# Supplementary material for: Using a system dynamics model to study the obesity transition by socioeconomic status in Colombia at the country, regional and department levels
Source: PubMed Central journal article supplement — BMJ Open. 2020 Jun 3;10(6):e036534. doi: 10.1136/bmjopen-2019-036534 (PMC7282389; doi:10.1136/bmjopen-2019-036534), 2020-06-03
Supplement: bmjopen-2019-036534.draft_revisions.pdf [file bmjopen-2019-036534.draft_revisions.pdf]

# BMJ Open

BMJ Open is committed to open peer review. As part of this commitment we make the peer review history of every article we publish publicly available.

When an article is published we post the peer reviewers' comments and the authors' responses online. We also post the versions of the paper that were used during peer review. These are the versions that the peer review comments apply to.

The versions of the paper that follow are the versions that were submitted during the peer review process. They are not the versions of record or the final published versions. They should not be cited or distributed as the published version of this manuscript.

BMJ Open is an open access journal and the full, final, typeset and author-corrected version of record of the manuscript is available on our site with no access controls, subscription charges or pay-per-view fees (<http://bmjopen.bmj.com>).

If you have any questions on BMJ Open's open peer review process please email [info.bmjopen@bmj.com](mailto:info.bmjopen@bmj.com)

# BMJ Open

## Understanding the obesity transition by socioeconomic status in Colombia at different spatial scales

|                               |                                                                                                                                                                                                                                                                                                                                                                                                                                                                                                                                                                                                                                                                                                                                                   |
|-------------------------------|---------------------------------------------------------------------------------------------------------------------------------------------------------------------------------------------------------------------------------------------------------------------------------------------------------------------------------------------------------------------------------------------------------------------------------------------------------------------------------------------------------------------------------------------------------------------------------------------------------------------------------------------------------------------------------------------------------------------------------------------------|
| Journal:                      | <i>BMJ Open</i>                                                                                                                                                                                                                                                                                                                                                                                                                                                                                                                                                                                                                                                                                                                                   |
| Manuscript ID                 | bmjopen-2019-036534                                                                                                                                                                                                                                                                                                                                                                                                                                                                                                                                                                                                                                                                                                                               |
| Article Type:                 | Original research                                                                                                                                                                                                                                                                                                                                                                                                                                                                                                                                                                                                                                                                                                                                 |
| Date Submitted by the Author: | 18-Dec-2019                                                                                                                                                                                                                                                                                                                                                                                                                                                                                                                                                                                                                                                                                                                                       |
| Complete List of Authors:     | Meisel, Jose; Universidad de Ibague, Facultad de Ingeniería<br>Ramirez, Angie; Universidad de Ibague, Facultad de Ingeniería<br>Esguerra, Valentina; Universidad de los Andes, Department of Industrial Engineering, Social and Health Complexity Center<br>Montes, Felipe; Universidad de los Andes, Department of Industrial Engineering, Social and Health Complexity Center<br>Stankov, Ivana; Drexel University, Urban Health Collaborative, Dornsife School of Public Health<br>Sarmiento, Olga ; Universidad de los Andes, Department of Public Health, School of Medicine<br>Valdivia, Juan; Universidad de Chile, Departamento de Física, Facultad de Ciencias; Centro para el Desarrollo de la Nanociencia y la Nanotecnología, CEDENNA |
| Keywords:                     | EPIDEMIOLOGY, PUBLIC HEALTH, STATISTICS & RESEARCH METHODS, NUTRITION & DIETETICS                                                                                                                                                                                                                                                                                                                                                                                                                                                                                                                                                                                                                                                                 |
|                               |                                                                                                                                                                                                                                                                                                                                                                                                                                                                                                                                                                                                                                                                                                                                                   |

SCHOLARONE™  
Manuscripts

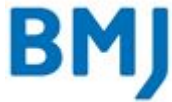

I, the Submitting Author has the right to grant and does grant on behalf of all authors of the Work (as defined in the below author licence), an exclusive licence and/or a non-exclusive licence for contributions from authors who are: i) UK Crown employees; ii) where BMJ has agreed a CC-BY licence shall apply, and/or iii) in accordance with the terms applicable for US Federal Government officers or employees acting as part of their official duties; on a worldwide, perpetual, irrevocable, royalty-free basis to BMJ Publishing Group Ltd ("BMJ") its licensees and where the relevant Journal is co-owned by BMJ to the co-owners of the Journal, to publish the Work in this journal and any other BMJ products and to exploit all rights, as set out in our [licence](#).

The Submitting Author accepts and understands that any supply made under these terms is made by BMJ to the Submitting Author unless you are acting as an employee on behalf of your employer or a postgraduate student of an affiliated institution which is paying any applicable article publishing charge ("APC") for Open Access articles. Where the Submitting Author wishes to make the Work available on an Open Access basis (and intends to pay the relevant APC), the terms of reuse of such Open Access shall be governed by a Creative Commons licence – details of these licences and which [Creative Commons](#) licence will apply to this Work are set out in our licence referred to above.

Other than as permitted in any relevant BMJ Author's Self Archiving Policies, I confirm this Work has not been accepted for publication elsewhere, is not being considered for publication elsewhere and does not duplicate material already published. I confirm all authors consent to publication of this Work and authorise the granting of this licence.

# Understanding the obesity transition by socioeconomic status in Colombia at different spatial scales

Jose D. Meisel<sup>1\*</sup>, Angie M. Ramirez<sup>2</sup>, Valentina Esguerra<sup>3</sup>, Felipe Montes<sup>4</sup>, Ivana Stankov<sup>5</sup>, Olga L. Sarmiento<sup>6</sup>, Juan A. Valdivia<sup>7,8</sup>

<sup>1</sup> Facultad de Ingeniería, Universidad de Ibagué, Carrera 22 Calle 67, 730001, Ibagué, Colombia. Ph: +57(8) 2760010. Fax: +57(8) 2760010. [jd.meisel28@gmail.com](mailto:jd.meisel28@gmail.com)

<sup>2</sup> Facultad de Ingeniería, Universidad de Ibagué, Carrera 22 Calle 67, 730001, Ibagué, Colombia. Ph: +57(8) 2760010. Fax: +57(8) 2760010. [angie.ramirez@unibague.edu.co](mailto:angie.ramirez@unibague.edu.co)

<sup>3</sup> Department of Industrial Engineering, Social and Health Complexity Center, Universidad de los Andes, Carrera 1 Este No. 19A-40, Bogotá, Colombia. [v.esguerra@uniandes.edu.co](mailto:v.esguerra@uniandes.edu.co)

<sup>4</sup> Department of Industrial Engineering, Social and Health Complexity Center, Universidad de los Andes, Carrera 1 Este No. 19A-40, Bogotá, Colombia. [v.esguerra@uniandes.edu.co](mailto:v.esguerra@uniandes.edu.co)

<sup>5</sup> Urban Health Collaborative, Dornsife School of Public Health, Drexel University, 3600 Market St, 7th floor, Philadelphia, PA 19104, USA. [is379@drexel.edu](mailto:is379@drexel.edu)

<sup>6</sup> Department of Public Health, School of Medicine, Universidad de los Andes, Carrera 1 Este No. 19A-40, Bogotá, Colombia. [osarmien@uniandes.edu.co](mailto:osarmien@uniandes.edu.co)

<sup>7</sup> Departamento de Física, Facultad de Ciencias, Universidad de Chile, Las Palmeras 3425, Ñuñoa Santiago, Chile. [alejo@macul.ciencias.uchile.cl](mailto:alejo@macul.ciencias.uchile.cl)

<sup>8</sup> Centro para el Desarrollo de la Nanociencia y la Nanotecnología, CEDENNA, Santiago, Chile.

\* Corresponding author: Jose D. Meisel, Carrera 22 Calle 67, Ibagué, Colombia. Ph: +57(8) 2760010 ext. 4006. Fax: +57(8) 2760010. [jd.meisel28@gmail.com](mailto:jd.meisel28@gmail.com)

## Key words

Epidemiology, Public Health, Obesity Transition, System Dynamics Model, Complex System, System Science

## ABSTRACT

1 **Objective:** We study the obesity dynamics by socioeconomic status (SES), sex, and age within the

Colombian urban population at the country, regional, and department level by developing a system dynamics (SD) model.

**Methods:** The SD model captures the dynamics of obesity at different spatial scales in an aging population model by body mass index (BMI) categories, sex and SES, where the transferences rates (TRs) are estimated by a heuristic based on governmental surveys.

**Results:** The heuristic results show that at a country-level estimated TRs towards overweight ( $\tau_1$ ) and obese ( $\tau_2$ ) have increased more rapidly among individuals adults in the lower SES group, particularly women (mean  $\tau_1 = 0.0195$  and mean  $\tau_2 = 0.0059$ , for men; and mean  $\tau_1 = 0.0245$  and mean  $\tau_2 = 0.0125$ , for women), suggesting that these groups will undergo an obesity transition by 2030.

The model projections indicate that the regions of Colombia are in different stages of the obesity transition. In the case of women, in five out of the six regions were expected to undergo an obesity transition by SES over time. For men, only in one region was expected to undergo an obesity transition. However, at the department-level, trends in the burden of obesity were diversified.

**Conclusions:**

Through our model, we evidence that Colombian population could be experiencing an obesity transition where the increase in the GDP could be related to shifts in the burden of obesity from higher to lower SES, especially in women. These patterns were consistently observed also across most regions in Colombia. However, inverse trends were observed in some departments. These patterns support the need for policy planning that considers SES and sex, at varying spatial scales, as important determinants of overweight and obesity among adults in Colombia.

**Article word count:** 4000

**Abstract word count:** 289

1  
2  
3 25 **Reference word count:** 1473

4  
5 26 **Number of References:** 53

6  
7 27 **Figures:** 5

8  
9 28 **Tables:** 1

## 11 12 29 **ARTICLE SUMMARY**

### 14 15 30 **Strengths and limitations**

- 18 31 • To our knowledge, this is the first Systems Dynamics (SD) model to explore the obesity  
19 32 transition by age, sex, and socioeconomic status (SES) across different spatial scales.
- 22 33 • The SD model has the capacity to incorporate a real-world ageing population structure from  
24 34 an upper middle-income country to dynamically explore the relationship between gross  
26 35 domestic product (GDP), and overweight and obesity prevalence, by sex and SES.
- 29 36 • Our study focuses only on GDP per capita as the main indicator of economic development at  
31 37 the country, region, and department-levels. This is the only indicator we had with available  
33 38 data across all time points and spatial scales.
- 35 39 • Transference rates (TRs) between BMI categories were estimated using two data points and  
37 40 we assumed no variation in mortality rates across BMI categories because these data were  
39 41 not available.
- 42 42 • Our model assumes that the estimated TRs between BMI categories do not change over  
43 43 time.

## 46 47 44 **INTRODUCTION**

48  
49  
50 45 Obesity has become a global epidemic with at least 2.8 million deaths each year attributable  
52 46 to overweight and obesity [1]. Obesity and overweight are associated with a range of non-  
54 47 communicable diseases (NCDs) including cardiovascular diseases, cancer, diabetes, and chronic

1  
2  
3 48 respiratory diseases. These NCDs are the leading global cause of death (70% of deaths worldwide)  
4  
5 49 [2], especially in low- and middle-income countries (LMIC) [3].  
6  
7

8 50 Studies of socioeconomic status (SES) and obesity have shown that LMIC are facing an  
9  
10 51 obesity transition, which sees the burden of obesity shift toward the lowest SES group, particularly  
11  
12 52 in women, as the economic development level of a country grows [4–7]. Growing evidence suggests  
13  
14 53 that several countries in Latin America and the Caribbean are experiencing an important and rapid  
15  
16 54 obesity transition [8,9](e.g. Chile [10], Brazil [11,12], Colombia [13–15], Mexico [16], Argentina  
17  
18 55 [17]). These findings have been echoed most recently by Jaacks et al. [18] who suggest that some  
19  
20 56 Latin-American countries (e.g., Mexico, Colombia, Brazil) have experienced an obesity transition. In  
21  
22 57 1975, these countries were in a stage characterized by a higher prevalence of obesity in women  
23  
24 58 compared with men. In 2016, these countries had entered to new stage that is characterized, mainly,  
25  
26 59 by a reduction in the difference of obesity prevalence by SES among women.  
27  
28  
29

30 60 This paper focuses on Colombia because it has experienced significant increases in the Gross  
31  
32 61 domestic product (GDP) over the decade (GDP increased from USD 146.566 billion in 2005 to USD  
33  
34 62 291.52 billion [19] in 2015). Moreover, there is evidence that Colombia may be undergoing an obesity  
35  
36 63 transition both at the country- and regional-level. According to the “Encuesta Nacional de la Situación  
37  
38 64 Nutricional en Colombia” (ENSIN) of 2005 and 2010 [20,21], at the country level there was a higher  
39  
40 65 increase in the prevalence of obesity in the lowest wealth index (WI) quintile compared to the highest  
41  
42 66 WI quintile for children, adolescents, and adults. These patterns, however, differ importantly by  
43  
44 67 region and department level, but have not been evaluated. Identifying, at different spatial scales the  
45  
46 68 patterns of obesity transition is key to develop more targeted and effective interventions  
47  
48  
49

50 69 Furthermore, obesity can be tackled as a complex adaptive system [22] due to the global  
51  
52 70 scope, heterogeneous patterns, wide-ranging causes and impacts, and the absence of a single solution.  
53  
54 71 Given the dynamic and complex nature of obesity, calls have been made for the use of complex  
55  
56  
57  
58  
59  
60

1  
2  
3 72 systems methods to better understand and address the public health challenges posed by the obesity  
4  
5 73 epidemic [23]. To date however, most studies focused on understanding the relationship between  
6  
7 74 economic development and obesity across the socioeconomic spectrum have applied statistical  
8  
9 75 models (regression-based approaches) [5–7]. To date, studies employing complex systems  
10  
11 76 approaches to understand obesity and its associated factors have used methods such as, system  
12  
13 77 dynamics (SD) [15,24–28], network analysis (NA) [29–33] and agent based modelling (ABM) [34–  
14  
15 78 37]. The body of literature applying complex system approaches to investigate the dynamics of  
16  
17 79 obesity by SES and sex on the other hand, remains limited and only one study has been conducted in  
18  
19 80 a Latin America country without accounting for the diversity at the subnational level[18,38].  
20  
21  
22

23 81 At the population-level, various SD models have been proposed to study the dynamics of  
24  
25 82 obesity, for example: the nutritional stage dynamics between body mass index (BMI) categories by  
26  
27 83 age and SES [15], the energy imbalance gap (EIG) by sex and racial subpopulations among US adults  
28  
29 84 [25], weight gain and obesity in women of reproductive age and its impact on family building [24],  
30  
31 85 the distributions of weight and SES and the transitions between these states over time in US [28], and  
32  
33 86 the effect of changes in the eating behavior of British children (aged 2 to 15 years) on weight and  
34  
35 87 obesity [26]. These studies were developed to monitor the impact of health interventions and evaluate  
36  
37 88 different scenarios and policies to deal with the obesity.  
38  
39  
40

41 89 Although different SD models have been developed to study obesity dynamics at the  
42  
43 90 population-level, to date there has been no attempt to understanding this complex system at different  
44  
45 91 spatial scales. This study seeks to bridge this gap by applying SD to investigating the obesity  
46  
47 92 dynamics by SES, sex, and age within the Colombian urban population at the country, regional, and  
48  
49 93 department level. Specifically, we seek to identify in which regions and departments of Colombia the  
50  
51 94 burden of obesity have shifted towards the lower SES.  
52  
53  
54

## 55 95 **Methods**

56  
57  
58  
59  
60



## 96 **Model overview**

97 To analyse the obesity dynamics at different spatial scales, we developed a population-level  
 98 SD model and used a heuristic to estimate the transition rates (TRs) between BMI categories by age,  
 99 sex, and SES, which were based on a validated and calibrated model [15,39]. We estimated the TRs  
 100 between BMI categories by age, sex, and SES and applied the SD model to investigate the obesity  
 101 dynamics by SES within the Colombian urban population. We only simulated the urban population  
 102 at different scales because the highest SES group in rural areas is poorly represented (i.e., less than  
 103 0.05% of the population) [40].

## 104 **Data**

105 The main data source used to simulate the models was the ENSIN [20,21]. The ENSIN used  
 106 a multistage, stratified, population-based cluster sampling design that included both household and  
 107 individual components. The questionnaire was administered in the home by female interviewers  
 108 equipped with computer-assisted personal interview technology. The sample for 2005 and 2010  
 109 comprised individuals aged 0 to 64 years for whom objective anthropometric measurement data were  
 110 available. All the protocols were reviewed and approved by the Profamilia Institutional Review Board  
 111 on Research Involving Human Subjects. All the data used in the model were obtained from public  
 112 sources and are fully available in S2 and S3 supplementary files. Table 1 describes the data sources  
 113 used in the model.

114 **Table 1. Data sources used in the model<sup>†</sup>**

| <i>Item</i>                                                                                    | <i>Data Source</i>                                                           |
|------------------------------------------------------------------------------------------------|------------------------------------------------------------------------------|
| <i>Prevalence rates by BMI category, age, and WI at country, regional and department level</i> |                                                                              |
| BMI for age and sex z-score for children and adolescents aged 0 to 17 years by WI              | National Nutrition Survey, 2005 [20]<br>National Nutrition Survey, 2010 [21] |
| BMI category prevalence by age, sex, and WI                                                    |                                                                              |

|                                                                                                                                                                                                                                                                                                                                                                               |                                                                                                                                                                                                                                                                                                                                |
|-------------------------------------------------------------------------------------------------------------------------------------------------------------------------------------------------------------------------------------------------------------------------------------------------------------------------------------------------------------------------------|--------------------------------------------------------------------------------------------------------------------------------------------------------------------------------------------------------------------------------------------------------------------------------------------------------------------------------|
| for adults                                                                                                                                                                                                                                                                                                                                                                    |                                                                                                                                                                                                                                                                                                                                |
| <b><i>Population composition at country, regional and department level</i></b>                                                                                                                                                                                                                                                                                                |                                                                                                                                                                                                                                                                                                                                |
| Population size by age, sex, and WI                                                                                                                                                                                                                                                                                                                                           | Colombian National Department of Statistics (DANE). Estimations and population projections for 1985–2020 [41]                                                                                                                                                                                                                  |
| Mortality rates by age group and sex                                                                                                                                                                                                                                                                                                                                          | DANE. Vital Statistics (2005) [42]                                                                                                                                                                                                                                                                                             |
| Fertility rate                                                                                                                                                                                                                                                                                                                                                                | World Data Bank. World Development Indicators (1960–2014) [43]<br><br>Projections for 2015–2030. Forecast series using the Holt-Winters no seasonal method in EViews 10 (Quantitative Micro Software, LLC)<br><br>DANE. Population series-Fertility estimations (1985-2005) y Projections (2005-2020) for Colombia states[41]. |
| Fraction of births by BMI category and sex                                                                                                                                                                                                                                                                                                                                    | National Nutrition Survey, 2005 [20]                                                                                                                                                                                                                                                                                           |
| <b><i>Classification of individuals by BMI category</i></b>                                                                                                                                                                                                                                                                                                                   |                                                                                                                                                                                                                                                                                                                                |
| Height-for-age z-score and BMI for age and sex z-score cutoff points for children and adolescents aged 0 to 17 years:<br><br>Not overweight: BMI for age and sex z-score $\leq 1$ standard deviation.<br>Overweight: BMI for age and sex z-score $> 1$ standard deviation and $\leq 2$ standard deviations.<br>Obese: BMI for age and sex z-scores $> 2$ standard deviations. | WHO child growth standards [44]<br><br>WHO child growth references [45]                                                                                                                                                                                                                                                        |
| BMI category cut-points for adults aged 18 to 64 years:<br><br>Not overweight: BMI $< 25$ kg/m <sup>2</sup><br>Overweight: BMI $\geq 25$ and $< 30$ kg/m <sup>2</sup><br>Obese: BMI $\geq 30$ kg/m <sup>2</sup>                                                                                                                                                               | WHO cut-off points [46]                                                                                                                                                                                                                                                                                                        |
| <b><i>SES indicator</i></b>                                                                                                                                                                                                                                                                                                                                                   |                                                                                                                                                                                                                                                                                                                                |
| Wealth index quintile                                                                                                                                                                                                                                                                                                                                                         | National Nutrition Survey, 2005 [20]                                                                                                                                                                                                                                                                                           |

|                                             |                                                                                                                                                                                              |
|---------------------------------------------|----------------------------------------------------------------------------------------------------------------------------------------------------------------------------------------------|
|                                             | National Nutrition Survey, 2010 [21]                                                                                                                                                         |
| <i>Economic development level indicator</i> |                                                                                                                                                                                              |
| GDP per capita at regional and state level  | DANE. Gross domestic product per capita [47]<br><br>Projections for 2017–2030. Forecast series using the double exponential smoothing method in EViews 10 (Quantitative Micro Software, LLC) |

115 †DHS = Demographic and Health Surveys; DANE = Colombian National Department of Statistics  
 116 (for the Spanish acronym); WHO = World Health Organization; BMI = body mass index; WI = wealth  
 117 index.

## 118 Patient and Public Involvement statement

119 Due to the very technical methods required to do the data analysis, patients or the public were  
 120 not involved in the design or dissemination plans of our research.

## 121 Model to assess the obesity dynamics

122 We used a population-level SD model to assess the obesity dynamics by SES at different  
 123 spatial scales. The population-level SD model includes ageing chains for three BMI categories (*not*  
 124 *overweight, overweight, and obese*); in which the population aged 0-59 years was divided into age  
 125 groups of 5 years. People in the 60 to 64 age group are not represented within the SD model. This is  
 126 because 2010 prevalence rates by BMI categories for the age group 65 to 69, which are required for  
 127 a reliable estimate of the TRs for this age group, are unavailable. Individuals were classified into the  
 128 three BMI categories based on WHO standards and references (Table 1) [44–46]. Additionally, in the  
 129 SD model structure we included births and deaths (the mortality rates differed among the age groups  
 130 and sex) for each cohort [39]. Given our interest in investigating the obesity dynamics by SES, we  
 131 assumed the same mortality rate for each BMI category in each age group. We did not include net

1  
2  
3 132 migration as a variable in the SD model because to date, there are no data for Colombia that relate to  
4  
5 133 mortality rates or net migration patterns by BMI category [40]. To stratify the population by SES  
6  
7 134 group we used the World Bank's Wealth Index (WI) [48]. It is a validated index that allows  
8  
9 135 categorization of the population into socio-economic groups and captures quality of life markers [49].  
10  
11 136 We grouped the WI quintiles into three socioeconomic groups: the lowest and second quintiles  
12  
13 137 (lowest SES group), the middle quintile (middle SES group), and the fourth and highest quintiles  
14  
15 138 (highest SES group).

16  
17  
18  
19 139 To examine the obesity transition by SES over time, we compared the lowest SES group with  
20  
21 140 the highest SES group using the simulated obesity prevalence ratio (PR), which is a measure of the  
22  
23 141 ratio of the probability for each sex  $j$  of being obese in the lowest SES group to the probability of  
24  
25 142 being obese in the highest SES group for individuals aged 20 to 59 years, according to the following  
26  
27 143 equation:

$$144 \quad PR_j(t) = \frac{\sum_{i=4}^{11} O_{i,j,1}(t)}{\sum_{i=4}^{11} (N_{i,j,1}(t) + W_{i,j,1}(t) + O_{i,j,1}(t))} \bigg/ \frac{\sum_{i=4}^{11} O_{i,j,3}(t)}{\sum_{i=4}^{11} (N_{i,j,3}(t) + W_{i,j,3}(t) + O_{i,j,3}(t))}$$

28  
29  
30  
31  
32  
33  
34  
35  
36  
37  
38  
39 145 where  $N_{i,j,1}$ ,  $W_{i,j,1}$ ,  $O_{i,j,1}$  represent *not overweight*, *overweight*, and *obese* individuals with the  
40  
41 146 lowest SES, respectively, in age group  $i$  and sex  $j$ , and  $N_{i,j,3}$ ,  $W_{i,j,3}$ ,  $O_{i,j,3}$  represent *not overweight*,  
42  
43 147 *overweight*, and *obese* individuals of higher SES, respectively, in age group  $i$  and sex  $j$ . A PR value  
44  
45 148 greater than one indicates that the obesity prevalence of the lowest SES group is greater than the  
46  
47 149 obesity prevalence of the highest SES group. We assumed that individuals did not change SES group  
48  
49 150 membership because there are no available data from which TRs between SES groups can be derived  
50  
51 151 for individuals in Colombia, at the country, regional, or department level. Additionally, we used the  
52  
53 152 GDP per capita to study the relation between the level of economic development, and obesity by SES  
54  
55  
56  
57  
58  
59  
60

1  
2  
3 153 over time. To analyse the relation between obesity PRs by SES and the economic development level  
4  
5 154 over time, we forecasted the GDP per capita from 2017 to 2030 by applying a double exponential  
6  
7 155 smoothing method to GDP data from the DANE [47]. The full description of the SD model is  
8  
9 156 available in the S1 appendix pp. 3-5.

11  
12 157 We used a similar SD model to simulate the obesity dynamics at the regional and department level.  
13  
14 158 At the regional level, we studied the obesity dynamics by SES and sex in six regions: Atlántica,  
15  
16 159 Bogotá, Central, Oriental, Orinoquía y Amazonia, and Pacífico. At the department level, we only  
17  
18 160 studied the obesity dynamics by SES in 29 of 32 states of Colombia. The model could not be used to  
19  
20 161 simulate Choco, Vaupes, and Vichada departments because reliable TR estimates could not be  
21  
22 162 generated for these departments due to limitations in the ENSIN data. Similarly, data sparsity for the  
23  
24 163 Putumayo, Amazonas, Guainía, and Guaviare departments, made it impossible to estimate the TRs  
25  
26 164 for the highest SES group. Therefore, for these departments, we assessed the obesity dynamics by  
27  
28 165 SES, by comparing the lowest SES group with the middle SES group using the PR of obesity.  
29  
30 166 Additionally, the forecasts of the GDP per capita for the Arauca, Casanare, Meta, and Putumayo  
31  
32 167 departments were not used because these departments had an unstable GDP per capita growth over  
33  
34 168 time and the forecasts therefore did not have a good fit. Finally, at department level, we did not  
35  
36 169 include sex to simulate the obesity dynamics and to estimate the TRs between BMI categories due to  
37  
38 170 limitations in the ENSIN data when we divided the population into BMI categories, sex, and SES.  
39  
40 171 The data processing was conducted using SAS 9.3 (SAS Institute Inc.) and Mathematica 11 (Wolfram  
41  
42 172 Research, Inc.), while all simulations were run on iThink 9.0.2 (ISEE Systems, Inc.).  
43  
44  
45  
46

## 47 173 **RESULTS**

### 48 174 **Obesity dynamics at country level by sex, age, and SES**

49  
50  
51 175 The results of the heuristic show that estimated TRs towards overweight ( $\tau_1$ ) and obese ( $\tau_2$ )  
52  
53 176 have increased more rapidly among individuals in the lower SES group, particularly women (mean  
54  
55  
56  
57  
58  
59  
60

1  
2  
3 177  $\tau_1 = 0.0195$  and mean  $\tau_2 = 0.0059$ , for men; and mean  $\tau_1 = 0.0245$  and mean  $\tau_2 = 0.0125$ , for women),  
4  
5 178 than among those in the middle (mean  $\tau_1 = 0.0159$  and mean  $\tau_2 = 0.0037$ , for men; and mean  $\tau_1 =$   
6  
7 179  $0.0164$  and mean  $\tau_2 = 0.0095$ , for women), or higher SES groups (mean  $\tau_1 = 0.0143$  and mean  $\tau_2 =$   
8  
9 180  $0.0061$ , for men; and mean  $\tau_1 = 0.0169$  and mean  $\tau_2 = 0.0041$ , for women) (Figures 1A, 1B, 1E and  
10  
11 181 1F). For boys aged 0 to 4 years, the TRs to overweight ( $\tau_1$ ) and obese ( $\tau_2$ ) appear to have increased  
12  
13 182 faster in the highest SES than the other SES groups (Figures 1A and 1B). For boys aged 10 to 14,  
14  
15 183 downward transitions in weight status from obese to overweight ( $\tau_3$ ) and from overweight to not  
16  
17 184 overweight ( $\tau_4$ ) have increased more rapidly in the middle and higher SES groups than in the lower  
18  
19 185 SES group according to heuristic estimates. For girls aged 5 to 9, on the other hand, downward  
20  
21 186 transitions in weight status from obese to overweight ( $\tau_3$ ) have increased more rapidly in the middle  
22  
23 187 and higher SES groups than in the lower SES group (Figure 1G).

24  
25  
26  
27 188 -----  
28  
29 189 Insert Figure 1 about here

30  
31 190 -----  
32  
33  
34 191 Simulation results show that the burden of obesity is shifting towards the lower SES  
35  
36 192 population, especially among adults (Figure 2). Between 2005 and 2030, the prevalence of  
37  
38 193 overweight among men aged 20 to 59 years in the lowest, middle, and highest SES groups increased  
39  
40 194 from 28.5% to 49%, 34.8% to 49.1%, and 40.8% to 50.6%, respectively (Figures 2D, 2E, and 2F).  
41  
42 195 While, in the case of women aged 20 to 59 years, the prevalence of overweight in the lowest, middle,  
43  
44 196 and highest SES groups increased from 32.6% to 46.8%, 34.2% to 43.8%, and 33.8% to 50.2%,  
45  
46 197 respectively (Figures 2M, 2N, and 2Ñ). Among obese adults aged 20 to 59 years, the differences  
47  
48 198 between SES groups were even more prominent with increases in men, from 7.9% to 13.6% for lower  
49  
50 199 SES and from 11.9% to 14% for middle SES groups (Figures 2G, and 2H) and, in women, from  
51  
52 200 13.8% to 29% for lower SES and from 19.1% to 26.6% for middle SES groups (Figures 2O, and 2P).  
53  
54  
55 201 Higher SES group on the other hand experienced a relatively small increase in obesity prevalence,  
56  
57  
58  
59

1  
2  
3 202 for both men and women (i.e., from 14.7% to 16.1% and from 18.3% to 19.8%, respectively) (Figures  
4  
5 203 2I, and 2Q).

6  
7  
8 204 -----  
9  
10 205 Insert Figure 2 about here

11  
12 206 -----  
13  
14

15 207 The simulated obesity prevalence ratios among urban men and women aged 20 to 59 years  
16  
17 208 (Figure 3) confirm that the burden of obesity among adults, especially women, tends to shift towards  
18  
19 209 those with lower SES. In fact, we confirmed that, for both men and women, the obese population of  
20  
21 210 lower SES is increasing faster than the obese population of higher SES suggesting that Colombia is  
22  
23 211 in the process of undergoing a very fast obesity transition. Despite these trends however, for men, the  
24  
25 212 burden of obesity is projected to remain greatest among individuals with high SES at least up to and  
26  
27 213 potentially beyond 2030.

28  
29  
30  
31 214 -----  
32  
33 215 Insert Figure 3 about here

34  
35 216 -----  
36  
37

## 38 217 **Obesity dynamics at region level by sex, age, and SES**

39  
40  
41 218 The model projections further indicate that the regions of Colombia are in different stages of  
42  
43 219 the obesity transition (Figure 4). For men, the only region that was projected to experience an obesity  
44  
45 220 transition, was Orinoquia y Amazonia. However, the GDP per capita within this region increased  
46  
47 221 only from 2005 to 2013 (percentage increase of 124.86%), followed by a small decrease in the period  
48  
49 222 between 2014 and 2016. In the Atlántica, Pacífica, and Central regions, the PR of obesity increased  
50  
51 223 more rapidly in the lowest SES group than the highest SES group as the GDP per capita increases.  
52  
53 224 Nevertheless, according to our model, these regions were unlikely to experience an obesity transition  
54  
55 225 by 2030. Bogotá and Oriental regions were also not expected to undergo an obesity transition. In fact,

1  
2  
3 226 the model's projections indicate that these two regions would likely follow an inverted trajectory  
4  
5 227 compared to other regions in Colombia (Figure 4A). In the case of women, in five out of the six  
6  
7 228 regions (i.e., Atlántica, Oriental, Central, Pacífico and Orinoquia y Amazonía) the burden of obesity  
8  
9 229 was projected to shift towards populations with lower SES, as the GDP per capita increased. Model  
10  
11 230 projections also suggest that these regions were likely to experience an obesity transition (Figure 4B).  
12  
13 231 While the burden of obesity was also observed to shift towards populations with lower SES in Bogotá,  
14  
15 232 women in this region were not projected to undergo an obesity transition, unlike those in the other  
16  
17 233 regions (Figure 4B).

18  
19  
20  
21 234 -----  
22  
23 235 Insert Figure 4 about here  
24  
25 236 -----  
26  
27

## 28 237 **Obesity dynamics at department-level by SES**

29  
30 238 Akin to the model projections at the regional-level, we observed that the departments of  
31  
32 239 Colombia are also at different stages of the obesity transition (Figure 5). In nine departments, we  
33  
34 240 observed that the obesity PR increased more rapidly in the lowest SES group than in the highest SES  
35  
36 241 group as the department's GDP per capita increased: Amazonas, Guanía, Cauca, Valle del Cauca,  
37  
38 242 Boyacá, Antioquia, Tolima, Caldas, and San Andres. In the states of Santander, Atlántico, Bolívar,  
39  
40 243 Norte de Santander, Cesar, La Guajira, Magdalena and Sucre , though these departments were  
41  
42 244 unlikely to experience an obesity transition according to model estimates. Similarly, in the  
43  
44 245 departments of Arauca, Casanare, and Putumayo, the PR of obesity increased more rapidly in the  
45  
46 246 lower SES group than in highest SES group (for the period with useable GDP estimates), though no  
47  
48 247 obesity transitions were apparent during the available years. On the other hand, in departments of  
49  
50 248 Cundinamarca, Córdoba, Huila, Nariño, Quindío, Risaralda, Caquetá, and Guaviare, the obesity PR  
51  
52 249 increased more rapidly in the highest SES group than in the lowest SES group, despite increases in  
53  
54 250 the GDP per capita (Figure 5). Similarly, in the Meta department, the obesity PR increased more  
55  
56  
57  
58  
59



1  
2  
3 251 rapidly in the higher SES group than in the lower SES group (for the period with useable GDP  
4  
5 252 estimates).

6  
7  
8 253 -----  
9  
10 254 Insert Figure 5 about here  
11  
12 255 -----  
13  
14

## 15 16 256 **Discussion**

17  
18  
19 257 The findings of this paper indicate that there exist substantial variations in the projected burden of  
20  
21 258 obesity by sex, age, and across the socioeconomic spectrum within and across the regions and  
22  
23 259 departments of Colombia. At the country-level, transitions from overweight to obesity were projected  
24  
25 260 to increase sharply among lower SES adults, particularly among women, suggesting that these groups  
26  
27 261 will undergo an obesity transition by 2030. These patterns were also observed across most regions of  
28  
29 262 Colombia where increases in GDP were predicted to shift the burden of obesity from higher to lower  
30  
31 263 SES groups, also being most evident for women. Although several regions were projected to  
32  
33 264 experience increases in GDP, men in only one region in Colombia (Orinoquia y Amazonia) were  
34  
35 265 expected to undergo an obesity transition by SES over time. At the department-level, trends in the  
36  
37 266 burden of obesity were mixed. For some departments, the burden was projected to shift from higher  
38  
39 267 to lower SES groups, with several of these departments expected to undergo an obesity transition.  
40  
41 268 However, inverse trends were observed in other departments where increases in GDP were  
42  
43 269 accompanied by more rapid increases in obesity prevalence among higher compared to lower SES  
44  
45 270 groups. These patterns support the need for policy planning that considers SES and sex, at varying  
46  
47 271 spatial scales, as important determinants of overweight and obesity among adults in Colombia.  
48  
49 272 Our overarching finding that the burden of obesity is projected to shift toward lower SES populations,  
50  
51 273 particularly among women, as GDP per capita increases, is consistent with previously published  
52  
53 274 studies focusing predominantly on country-level trends [5–7,9,18,28,50] . For example, a systematic  
54  
55  
56  
57  
58  
59  
60

1  
2  
3 275 review published in 2004, studying associations between SES and obesity in developing countries  
4  
5 276 found that the burden of obesity shifts to lower SES groups as a country's GNP increases [5].  
6  
7 277 Furthermore, our results also align with the findings of Jones-Smith et al's study [51]. The authors  
8  
9 278 observed that while overweight and obesity remained most prevalent among higher income  
10  
11 279 individuals in most countries, over time, the prevalence of obesity rose among those with the lowest  
12  
13 280 income as GDP per capita increased. Most recently, using evidence from over 30 countries, Jaacks  
14  
15 281 et al. [18] illustrated the obesity transition at different stages, demonstrating that as the level of  
16  
17 282 economic development increases, the prevalence of obesity is greater in the lower SES than in the  
18  
19 283 higher SES, especially in women.  
20  
21  
22 284 This paper also provides unique insights into how a system can demonstrate vastly different patterns  
23  
24 285 and behavior at different levels of aggregation. For example, increases in GDP were associated with  
25  
26 286 obesity transition by SES at the country-level and across most regions of Colombia, particularly  
27  
28 287 among women. This patterning however, was not consistently observed at the department-level where  
29  
30 288 seemingly only the departments that experienced sizeable increases in the level of economic  
31  
32 289 development, such as Amazonas, Guanía, Cauca, Valle del Cauca, Boyacá, Antioquia, Tolima,  
33  
34 290 Caldas, San Andres, Santander, Atlántico, Bolívar, Cesar, La Guajira, Magdalena, and Sucre, were  
35  
36 291 projected to undergo an obesity transition by SES, as the GDP per capita increased. These findings  
37  
38 292 are consistent with the study by Jaacks et al. [18] which suggested that variations in obesity transitions  
39  
40 293 at a subnational level may be explained by socioeconomic factors and inequalities. It is also possible  
41  
42 294 that the observed differences across country/ region and department-levels are an artifact of our  
43  
44 295 study's exclusive focus on GDP, the only indicator we had with available data across all time points  
45  
46 296 and spatial scales. Perhaps other indicators, such as the HDI or education level, have a more robust  
47  
48 297 relationship with the obesity transition across country, region, and department-levels [6]. Another  
49  
50 298 potential reason for the observed differences at the department-level could relate to the fact that we  
51  
52 299 were unable to model obesity dynamics by sex, due to data sparsity. Countries in LMIC particularly  
53  
54 300 LAC are very unequal and diverse[52]. As such the heterogeneity of obesity transition should be  
55  
56  
57  
58  
59  
60

1  
2  
3 301 taken into account for targeted interventions. This study provides for the first time a results at the  
4  
5 302 subnational level.

6  
7 303 The current analysis also has important policy implications. For Colombia, the results  
8  
9 304 provides patterns of transition by SES and sex that are crucial to monitor the implementation of  
10  
11 305 policies like the National Policy of Food and Nutrition Security and the obesity law. Both policies  
12  
13 306 have intersectorial actions to control the broad spectrum of malnutrition and non-communicable  
14  
15 307 diseases in Colombia. Furthermore, in regions like Amazonia & Orinoquia and Atlántica the target  
16  
17 308 has been mainly for implementing actions to tackle undernutrition, but our results also underscore the  
18  
19 309 importance to have programs aimed at controlling obesity transition. In fact, policies in Colombia  
20  
21 310 should account for the double burden mainly in low income communities[53]. In addition, our results  
22  
23 311 also underscores the importance of programs aimed at preventing obesity which could include PA  
24  
25 312 promotion, healthy eating, and taxes. In this context, programs of PA promotion like the program of  
26  
27 313 Hábitos y Estilos de Vida Saludable (HEVS; Healthy Life Habits) and the taxes to sugar beverages  
28  
29 314 are key programs. The program HEVS, in which women are more likely to participate, provides free  
30  
31 315 community-based physical activity classes for individuals across Colombia and has shown to have an  
32  
33 316 effect on decreasing BMI, waist circumference, and hypertension[54]. Lastly, simulations of the  
34  
35 317 potential impact of a tax on sugar sweetened beverages shows that it could reduce the overweight and  
36  
37 318 obesity prevalence particularly among low SES population[55].

38  
39  
40  
41 319 The findings of this study should be considered in light of a few limitations. First, the  
42  
43 320 accuracy of the model's predictions is somewhat limited given that the TRs between BMI categories  
44  
45 321 could only be estimated using two data points; the 2005 and 2010 ENSIN survey. Future studies  
46  
47 322 should validate model trends against survey data collected over a longer temporal window. Second,  
48  
49 323 we assumed no variation in mortality rates across BMI categories because these data were not  
50  
51 324 available. To this end, future data collection efforts should include more nuanced collection of  
52  
53 325 mortality data and regular assessments of BMI by age, sex, and wealth index at different spatial scales.  
54  
55 326 Third, our model assumes that the estimated TRs between BMI categories do not change over time.

1  
2  
3 327 Future extensions of the model should dynamically incorporate the impact of other factors, on  
4  
5 328 temporal changes in BMI TRs and their effects on obesity PR projections by SES. Fourth, our study  
6  
7 329 focuses on GDP per capita as the main indicator of economic development at the country, region, and  
8  
9 330 department-levels. Future studies should explore other measures, such as HDI or education level, that  
10  
11 331 may function as better indicators of social and economic development across all three spatial units.  
12  
13 332 Finally, given our finding that trends in obesity transition vary across spatial scales, future studies  
14  
15 333 should explore whether threshold effects in GDP could explain these observations, and whether  
16  
17 334 indeed, there exist different critical points for transitions at the country, region, and department-level.  
18  
19  
20 335

## 21 336 **Conclusion**

22  
23  
24 337 Our model suggests that increases in GDP may be associated with shifts in the burden of obesity from  
25  
26 338 higher to lower SES urban dwellers, especially lower SES women. According to the model's  
27  
28 339 projections, by 2030, these shifts could signal obesity transitions among lower SES women. These  
29  
30 340 patterns were consistently observed at the country-level and across most regions in Colombia. There  
31  
32 341 are several implications of these findings, including policy planning at different levels of government  
33  
34 342 and the potential need to target population subgroups at greatest risk of obesity transition in the  
35  
36 343 coming years.

## 39 400 **AUTHORS CONTRIBUTIONS**

41 401 All authors had substantial contributions in the article. Particularly, JDM and OLS designed the study.  
42  
43 402 JDM and VE did the analysis and interpretation of data. JDM, AMR, OLS, FM, IS and JAV led the  
44  
45 403 writing of the report. OLS, JAV, FM, IS and AMR contributed in the analysis and interpretation of  
46  
47 404 data. JDM and JAV developed the mathematical model fully described in the supplementary  
48  
49 405 appendix. OLS, IS, AMR and FM reviewed the mathematical model, and JDM implemented the  
50  
51 406 model under the direction of JAV. Finally, all authors drafted sections of the report, provided critical  
52  
53 407 review of the draft, and approved the final version of the manuscript.  
54  
55 408

## 352 FUNDING

353 This work was supported by project #19-528-ESP of the joint grant of Research Office at the  
354 Universidad de Los Andes and the Universidad de Ibagué. FM was funded by NIH FIC  
355 D43TW010540, and by FAPA grant PR.3.2017.4527 of Universidad de los Andes. OLS received  
356 funding from the Administrative Department of Science, Technology and Innovation (Colciencias  
357 grant number 726-2016) and Vicerrectoria de Investigaciones from Universidad de los Andes. JAV  
358 thanks Fondecyt grant 1190703 and the support of Centro para el Desarrollo de la Nanociencias y la  
359 Nanotecnología (CEDENNA).

## 360 COMPETING INTERESTS

361 The authors declare no conflict of interest.

## 362 DATA SHARING STATEMENT

363 All data used in this study are within the paper and its Supplementary files.

## 364 References

- 365 1 Ng M, Fleming T, Robinson M, *et al*. Global, regional, and national prevalence of overweight  
366 and obesity in children and adults during 1980-2013: a systematic analysis for the Global  
367 Burden of Disease Study 2013. *The Lancet* 2018;**384**:766–81. doi:10.1016/S0140-  
368 6736(14)60460-8
- 369 2 Forouzanfar MH, Afshin A, Alexander LT, *et al*. Global, regional, and national comparative  
370 risk assessment of 79 behavioural, environmental and occupational, and metabolic risks or  
371 clusters of risks, 1990–2015: a systematic analysis for the Global Burden of Disease Study  
372 2015. *The Lancet* 2016;**388**:1659–724. doi:10.1016/S0140-6736(16)31679-8
- 373 3 World Health Organization. *Global status report on noncommunicable diseases 2014*. WHO  
374 Library Cataloguing-in-Publication Data 2014.  
375 [http://apps.who.int/iris/bitstream/handle/10665/148114/9789241564854\\_eng.pdf;jsessionid=97](http://apps.who.int/iris/bitstream/handle/10665/148114/9789241564854_eng.pdf;jsessionid=97301FB348D75630E243392FDB4F5584?sequence=1)  
376 [301FB348D75630E243392FDB4F5584?sequence=1](http://apps.who.int/iris/bitstream/handle/10665/148114/9789241564854_eng.pdf;jsessionid=97301FB348D75630E243392FDB4F5584?sequence=1)
- 377 4 Monteiro CA, Conde WL, Lu B, *et al*. Obesity and inequities in health in the developing world.  
378 *Int J Obes* 2004;**28**:1181–6. doi:10.1038/sj.ijo.0802716

- 1  
2  
3 379 5 Monteiro CA, Moura EC, Conde WL, *et al.* Socioeconomic status and obesity in adult  
4 380 populations of developing countries : a review. *Public Health Rev* 2004;**82**.
- 6 381 6 Dinsa GD, Goryakin Y, Fumagalli E, *et al.* Obesity and socioeconomic status in developing  
7 382 countries: A systematic review. *Obes Rev* 2012;**13**:1067–79. doi:10.1111/j.1467-  
8 383 789X.2012.01017.x
- 10 384 7 McLaren L. Socioeconomic status and obesity. *Epidemiol Rev* 2007;**29**:29–48.  
11 385 doi:10.1093/epirev/mxm001
- 13 386 8 Abarca-Gómez L, Abdeen ZA, Hamid ZA, *et al.* Worldwide trends in body-mass index,  
14 387 underweight, overweight, and obesity from 1975 to 2016: a pooled analysis of 2416 population-  
15 388 based measurement studies in 128·9 million children, adolescents, and adults. *The Lancet*  
16 389 2017;**390**:2627–42. doi:10.1016/S0140-6736(17)32129-3
- 18 390 9 Jiwani SS, Carrillo-Larco RM, Hernández-Vásquez A, *et al.* The shift of obesity burden by  
19 391 socioeconomic status between 1998 and 2017 in Latin America and the Caribbean: a cross-  
20 392 sectional series study. *Lancet Glob Health* 2019;**7**:e1644–54. doi:10.1016/S2214-  
21 393 109X(19)30421-8
- 23 394 10 Zavala JP, Leraç L, Vio F, *et al.* Actividad física y dieta saludable , percepción de peso y estrés  
24 395 en población adulta de Chile : Análisis de la encuesta de calidad de vida y salud 2006. *Arch*  
25 396 *Latinoam Nutr* 2010;**60**:319–25.
- 27 397 11 Monteiro CA, Conde WL, Popkin BM. Income-specific trends in obesity in Brazil: 1975-2003.  
28 398 *Am J Public Health* 2007;**97**:1808–12. doi:10.2105/AJPH.2006.099630
- 30 399 12 Schmidt MI, Duncan BB, E Silva GA, *et al.* Chronic non-communicable diseases in Brazil:  
31 400 Burden and current challenges. *The Lancet* 2011;**377**:1949–61. doi:10.1016/S0140-  
32 401 6736(11)60135-9
- 34 402 13 Parra DC, Iannotti L, Gomez LF, *et al.* The nutrition transition in Colombia over a decade: a  
35 403 novel household classification system of anthropometric measures. *Arch Public Health*  
36 404 2015;**73**:12. doi:10.1186/s13690-014-0057-5
- 38 405 14 Olszowy KM, Dufour DL, Bender RL, *et al.* Socioeconomic status, stature, and obesity in  
39 406 women: 20-year trends in urban Colombia. *Am J Hum Biol* 2012;**24**:602–10.  
40 407 doi:10.1002/ajhb.22280
- 42 408 15 Meisel JD, Sarmiento OL, Olaya C, *et al.* Towards a novel model for studying the nutritional  
43 409 stage dynamics of the Colombian population by age and socioeconomic status. *PLoS ONE*  
44 410 2018;**13**:1–22. doi:10.1371/journal.pone.0191929
- 46 411 16 Pérez-Ferrer C, McMunn A, Zaninotto P, *et al.* The nutrition transition in Mexico 1988–2016:  
47 412 the role of wealth in the social patterning of obesity by education. *Public Health Nutr*  
48 413 2018;**21**:2394–2401. doi:10.1017/S1368980018001167
- 50 414 17 Tumas N, Junyent CR, Aballay LR, *et al.* Nutrition transition profiles and obesity burden in  
51 415 Argentina. *Public Health Nutr* undefined/ed;:1–11. doi:10.1017/S1368980019000429
- 53 416 18 Jaacks LM, Vandevijvere S, Pan A, *et al.* The obesity transition: stages of the global epidemic.  
54 417 *Lancet Diabetes Endocrinol* 2019;**7**:231–40. doi:10.1016/S2213-8587(19)30026-9

- 1  
2  
3 418 19 The World Bank Group. World Bank national accounts data, and OECD National Accounts  
4 419 data files. 2018.  
5  
6 420 20 Instituto Colombiano de Bienestar Familiar ICBF. Encuesta Nacional de la Situación  
7 421 Nutricional en Colombia ENSIN. Bogotá: : Instituto Colombiano de Bienestar Familiar ICBF  
8 422 2005.  
9  
10 423 21 Instituto Colombiano de Bienestar Familiar ICBF. Encuesta Nacional de la Situación  
11 424 Nutricional en Colombia ENSIN. Bogotá: : Instituto Colombiano de Bienestar Familiar ICBF  
12 425 2010.  
13  
14 426 22 Lee BY, Bartsch SM, Mui Y, *et al.* A systems approach to obesity. *Nutr Rev* 2017;**75**:94–106.  
15 427 doi:10.1093/nutrit/nuw049  
16  
17 428 23 Mabry PL, Bures RM. Systems science for obesity-related research questions: An introduction  
18 429 to the theme issue. *Am J Public Health* 2014;**104**:1157–9. doi:10.2105/AJPH.2014.302083  
19  
20 430 24 Sabounchi NS, Hovmand PS, Osgood ND, *et al.* A novel system dynamics model of female  
21 431 obesity and fertility. *Am J Public Health* 2014;**104**:1240–6. doi:10.2105/AJPH.2014.301898  
22  
23 432 25 Fallah-Fini S, Rahmandad H, Huang TTK, *et al.* Modeling US adult obesity trends: A system  
24 433 dynamics model for estimating energy imbalance gap. *Am J Public Health* 2014;**104**:1230–9.  
25 434 doi:10.2105/AJPH.2014.301882  
26  
27 435 26 Abidin NZ, Mamat M, Dangerfield B, *et al.* Combating obesity through healthy eating  
28 436 behavior: A call for system dynamics optimization. *PLoS ONE* 2014;**9**:1–17.  
29 437 doi:10.1371/journal.pone.0114135  
30  
31 438 27 Aktaş G, Tellioğlu N, Barlas Y, *et al.* Modeling the Long Term Dynamics of Obesity As a  
32 439 Societal Epidemic. In: *The 34th International System Dynamics Conference, July 2016, Delft,*  
33 440 *Netherlands MODELING.* 2016. 1–8.  
34  
35 441 28 Chen H-J, Xue H, Liu S, *et al.* Obesity trend in the United States and economic intervention  
36 442 options to change it: A simulation study linking ecological epidemiology and system dynamics  
37 443 modeling. *Public Health* 2018;**161**:20–8. doi:https://doi.org/10.1016/j.puhe.2018.01.013  
38  
39 444 29 Fletcher A, Bonell C, Sorhaindo A. You are what your friends eat: Systematic review of social  
40 445 network analyses of young people’s eating behaviours and bodyweight. *J Epidemiol*  
41 446 *Community Health* 2011;**65**:548–55. doi:10.1136/jech.2010.113936  
42  
43 447 30 Marks J, Barnett LM, Foulkes C, *et al.* Using social network analysis to identify key child care  
44 448 center staff for obesity prevention interventions: A pilot study. *J Obes* 2013;**2013**.  
45 449 doi:10.1155/2013/919287  
46  
47 450 31 Conte KP, Groen S, Loblay V, *et al.* Dynamics behind the scale up of evidence-based obesity  
48 451 prevention: Protocol for a multi-site case study of an electronic implementation monitoring  
49 452 system in health promotion practice. *Implement Sci* 2017;**12**. doi:10.1186/s13012-017-0686-5  
50  
51 453 32 Schaefer DR, Simpkins SD. Using social network analysis to clarify the role of obesity in  
52 454 selection of adolescent friends. *Am J Public Health* 2014;**104**:1223–9.  
53 455 doi:10.2105/AJPH.2013.301768  
54  
55  
56  
57  
58  
59  
60

- 1  
2  
3 456 33 Shin H-S, Valente TW, Riggs NR, *et al.* The interaction of social networks and child obesity  
4 457 prevention program effects: The pathways trial. *Obesity* 2014;**22**:1520–6.  
5 458 doi:10.1002/oby.20731  
6
- 7 459 34 Hennessy E, Ornstein JT, Economos CD, *et al.* Designing an Agent-Based Model for  
8 460 Childhood Obesity Interventions: A Case Study of ChildObesity180. *Prev Chronic Dis*  
9 461 2016;**13**:E04–E04. doi:10.5888/pcd13.150414  
10
- 11 462 35 Orr MG, Kaplan GA, Galea S. Neighbourhood food, physical activity, and educational  
12 463 environments and black/white disparities in obesity: A complex systems simulation analysis. *J*  
13 464 *Epidemiol Community Health* 2016;**70**:862–7. doi:10.1136/jech-2015-205621  
14
- 15 465 36 Hammond RA, Ornstein JT. A model of social influence on body mass index. *Ann N Y Acad*  
16 466 *Sci* 2014;**1331**:34–42. doi:10.1111/nyas.12344  
17
- 18 467 37 Beheshti R, Jalalpour M, Glass TA. Comparing methods of targeting obesity interventions in  
19 468 populations: An agent-based simulation. *SSM - Popul Health* 2017;**3**:211–8.  
20 469 doi:10.1016/j.ssmph.2017.01.006  
21
- 22 470 38 Morshed AB, Kasman M, Heuberger B, *et al.* A systematic review of system dynamics and  
23 471 agent-based obesity models: Evaluating obesity as part of the global syndemic. *Obes Rev*  
24 472 2019;**20**:161–78. doi:10.1111/obr.12877  
25
- 26 473 39 Meisel JD, Sarmiento OL, Olaya C, *et al.* A system dynamics model of the nutritional stages of  
27 474 the Colombian population. *Kybernetics* 2016;**45**:554–70. doi:http://dx.doi.org/10.1108/K-01-  
28 475 2015-0010  
29
- 30 476 40 Departamento Administrativo Nacional de Estadística. Series de población. 2017.  
31
- 32 477 41 Departamento Administrativo Nacional de Estadística. Proyecciones de población.  
33 478 2011.[https://www.dane.gov.co/index.php/estadisticas-por-tema/demografia-y-](https://www.dane.gov.co/index.php/estadisticas-por-tema/demografia-y-poblacion/proyecciones-de-poblacion)  
34 479 [poblacion/proyecciones-de-poblacion](https://www.dane.gov.co/index.php/estadisticas-por-tema/demografia-y-poblacion/proyecciones-de-poblacion) (accessed 20 Aug 2019).  
35
- 36 480 42 Departamento Administrativo Nacional de Estadística. Estadísticas Vitales.  
37 481 [https://www.dane.gov.co/index.php/estadisticas-por-tema/salud/nacimientos-y-](https://www.dane.gov.co/index.php/estadisticas-por-tema/salud/nacimientos-y-defunciones/defunciones-no-fetales/defunciones-no-fetales-2005?phpMyAdmin=3om27vamm65hhkhrtgc8rrn2g4)  
38 482 [defunciones/defunciones-no-fetales-](https://www.dane.gov.co/index.php/estadisticas-por-tema/salud/nacimientos-y-defunciones/defunciones-no-fetales/defunciones-no-fetales-2005?phpMyAdmin=3om27vamm65hhkhrtgc8rrn2g4)  
39 483 [2005?phpMyAdmin=3om27vamm65hhkhrtgc8rrn2g4](https://www.dane.gov.co/index.php/estadisticas-por-tema/salud/nacimientos-y-defunciones/defunciones-no-fetales/defunciones-no-fetales-2005?phpMyAdmin=3om27vamm65hhkhrtgc8rrn2g4) (accessed 9 Dec 2016).  
40
- 41 484 43 World Data Bank. World Development Indicators | DataBank.  
42 485 2018.[https://databank.worldbank.org/reports.aspx?source=World%20Development%20Indicato](https://databank.worldbank.org/reports.aspx?source=World%20Development%20Indicators)  
43 486 [rs](https://databank.worldbank.org/reports.aspx?source=World%20Development%20Indicators) (accessed 26 Aug 2019).  
44
- 45 487 44 World Health Organization. WHO Child Growth Standards: Length/height-for-age, weight-for-  
46 488 age, weight-for-length, weight-for-height and body mass index-for-age: Methods and  
47 489 development. Geneva: 2006.  
48 490 [http://www.who.int/childgrowth/standards/technical\\_report/en/index.html](http://www.who.int/childgrowth/standards/technical_report/en/index.html) (accessed 19 Feb  
49 491 2013).  
50
- 51 492 45 de Onis M, Onyango AW, Borghi E, *et al.* Development of a WHO growth reference for  
52 493 school-aged children and adolescents. *Bull World Health Organ* 2007;**85**:660–7.  
53  
54  
55  
56  
57  
58  
59  
60



- 1  
2  
3 494 46 Clinical guidelines on the identification, evaluation, and treatment of overweight and obesity in  
4 495 adults: executive summary. Expert Panel on the Identification, Evaluation, and Treatment of  
5 496 Overweight in Adults. *Am J Clin Nutr* 1998;**68**:899–917.
- 6  
7 497 47 Departamento Administrativo Nacional de Estadística. Gross domestic product per capita at  
8 498 current prices, base year 2005. Bogotá: 2018.
- 9  
10 499 48 Rutstein SO, Jonhson K. The DHS Wealth Index. DHS Comparative Reports no. 6. Calverton,  
11 500 MA: : ORC Macro 2004.
- 12  
13 501 49 Fotso J-C, Kuate-Defo B. Measuring socioeconomic status in health research in developing  
14 502 countries: Should we be focusing on households, communities or both? *Soc Indic Res*  
15 503 2005;**72**:189–237. doi:10.1007/s11205-004-5579-8
- 16  
17 504 50 Linando AY, Lee S-K. Socioeconomic, dietary, nutrition, body weight and epidemiologic  
18 505 transitions: three nations at different stage of development. *Prog Nutr* 2018;**20**:602–15.  
19 506 doi:10.23751/pn.v20i4.7274
- 20  
21 507 51 Jones-Smith JC, Gordon-Larsen P, Siddiqi A, *et al*. Is the burden of overweight shifting to the  
22 508 poor across the globe? Time trends among women in 39 low- and middle-income countries  
23 509 (1991–2008). *Int J Obes* 2012;**36**:1114–20. doi:10.1038/ijo.2011.179
- 24  
25 510 52 Diez Roux AV, Slesinski SC, Alazraqi M, *et al*. A Novel International Partnership for  
26 511 Actionable Evidence on Urban Health in Latin America: LAC-Urban Health and SALURBAL.  
27 512 *Glob Chall* 2019;**3**:1800013. doi:10.1002/gch2.201800013
- 28  
29 513 53 Sarmiento OL, Parra DC, González SA, *et al*. The dual burden of malnutrition in Colombia. *Am*  
30 514 *J Clin Nutr* 2014;**100**:1628S-1635S. doi:10.3945/ajcn.114.083816
- 31  
32 515 54 Gaffney LK, Lozano OD, Almanza A, *et al*. The Implementation of a National Physical  
33 516 Activity Intervention in Colombia. *J Phys Act Health* 2019;**16**:430–6. doi:10.1123/jpah.2018-  
34 517 0183
- 35  
36 518 55 Vecino-Ortiz AI, Arroyo-Ariza D. A tax on sugar sweetened beverages in Colombia:  
37 519 Estimating the impact on overweight and obesity prevalence across socio economic levels. *Soc*  
38 520 *Sci Med* 2018;**209**:111–6. doi:10.1016/j.socscimed.2018.05.043

521 **FIGURES LEGENDS**

522 **Figure 1. Estimated transference rates between BMI categories by age and SES for men and**  
523 **women at country level.** (A) Not overweight to overweight ( $\tau_1$ ) for men, (B) overweight to obese  
524 ( $\tau_2$ ) for men, (C) obese to overweight ( $\tau_3$ ) for men, and (D) overweight to not overweight ( $\tau_4$ ) for  
525 men. (E) Not overweight to overweight ( $\tau_1$ ) for women, (F) overweight to obese ( $\tau_2$ ) for women, (G)  
526 obese to overweight ( $\tau_3$ ) for women, and (H) overweight to not overweight ( $\tau_4$ ) for women.

527 **Figure 2. Estimated prevalence rates by BMI category, age, sex, and SES group.** For men: (A)  
528 *Not overweight*, lower SES; (B) *not overweight*, middle SES; (C) *not overweight*, higher SES; (D)  
529 *overweight*, lower SES; (E) *overweight*, middle SES; (F) *overweight*, higher SES; (G) *obese*, lower  
530 SES; (H) *obese*, middle SES; and (I) *obese*, higher SES. For women: (J) Not overweight, lower SES;  
531 (K) not overweight, middle SES; (L) not overweight, higher SES; (M) overweight, lower SES; (N)  
532 overweight, middle SES; (Ñ) overweight, higher SES; (O) *obese*, lower SES; (P) *obese*, middle SES;  
533 and (Q) *obese*, higher SES. Blue = 2005; Green = 2010; Red = 2020; Orange = 2030.

534 **Figure 3. Obesity prevalence ratio amongst urban adults aged 20 to 59 years. A) Men. B)**  
535 **Women**

536 **Figure 4. Prevalence ratio of obesity (Lower SES vs Higher SES) amongst urban adults aged**  
537 **20 to 59 years vs gross domestic product (GDP) per capita at regional level.** Obesity prevalence  
538 ratios greater than one signal obesity transitions by SES. Bubble size based on the total GDP per  
539 capita for each region. We calculated the forecast of the GDP per capita from 2017 to 2030. A) Men.  
540 B) Women

541 **Figure 5. Prevalence ratio of obesity (Lower SES vs Higher SES) amongst urban adults aged**  
542 **20 to 59 years vs gross domestic product per capita at department level.** Obesity prevalence ratios  
543 greater than one signal obesity transitions by SES. A) Atlántica region. B) Oriental region. C) Central  
544 region. D) Pacífica region. E) Orinoquia y Amazonia region. Bubble size based on the gross domestic  
545 product per capita. We calculated the forecast of the GNP per capita from 2017 to 2030.

1  
2  
3  
4  
5  
6  
7  
8  
9  
10  
11  
12  
13  
14  
15  
16  
17  
18  
19  
20  
21  
22  
23  
24  
25  
26  
27  
28  
29  
30  
31  
32  
33  
34  
35  
36  
37  
38  
39  
40  
41  
42  
43  
44  
45  
46  
47  
48  
49  
50  
51  
52  
53  
54  
55  
56  
57  
58  
59  
60

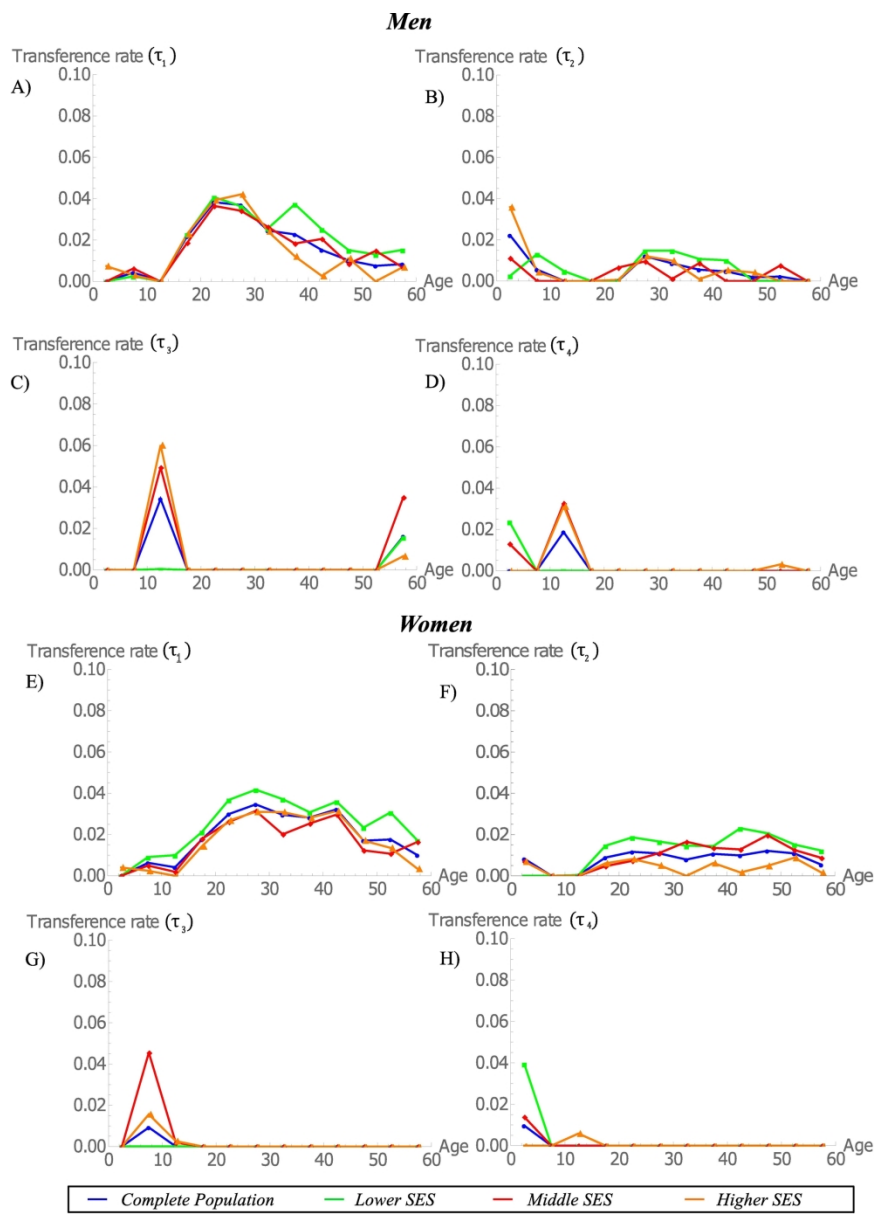

Figure 1. Estimated transference rates between BMI categories by age and SES for men and women at country level

189x262mm (300 x 300 DPI)

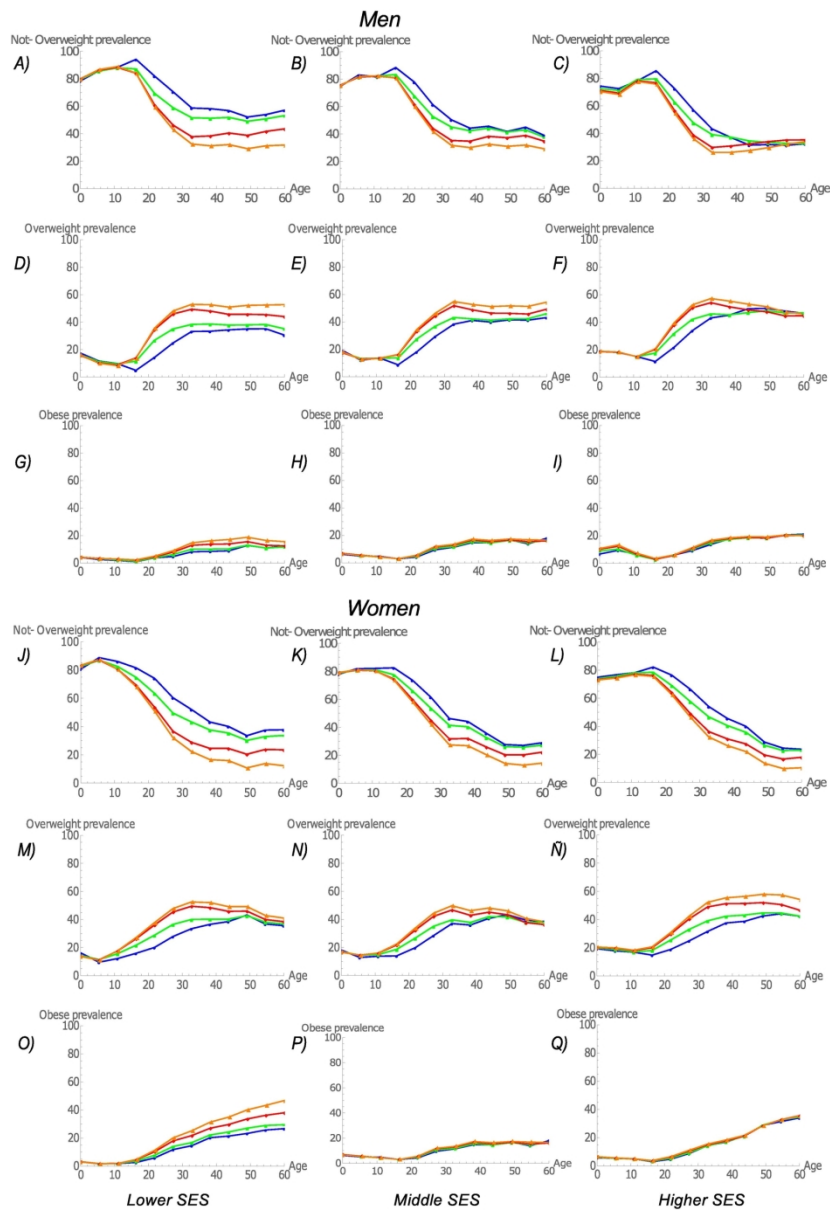

Figure 2. Estimated prevalence rates by BMI category, age, sex, and SES group

145x212mm (300 x 300 DPI)

1  
2  
3  
4  
5  
6  
7  
8  
9  
10  
11  
12  
13  
14  
15  
16  
17  
18  
19  
20  
21  
22  
23  
24  
25  
26  
27  
28  
29  
30  
31  
32  
33  
34  
35  
36  
37  
38  
39  
40  
41  
42  
43  
44  
45  
46  
47  
48  
49  
50  
51  
52  
53  
54  
55  
56  
57  
58  
59  
60

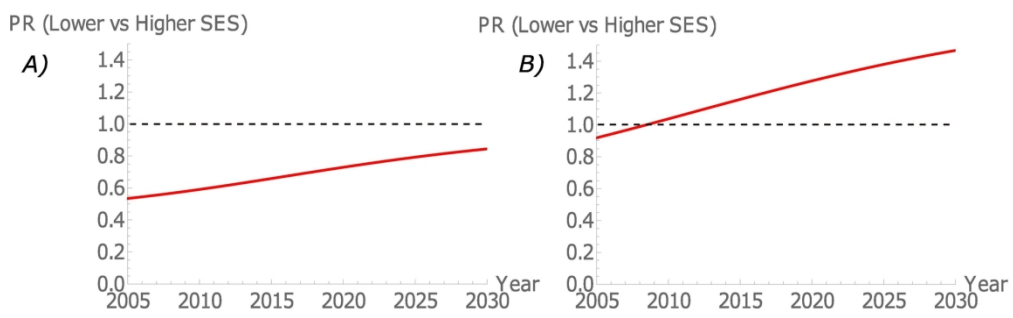

Figure 3. Obesity prevalence ratio amongst urban adults aged 20 to 59 years. A) Men. B) Women

167x50mm (300 x 300 DPI)

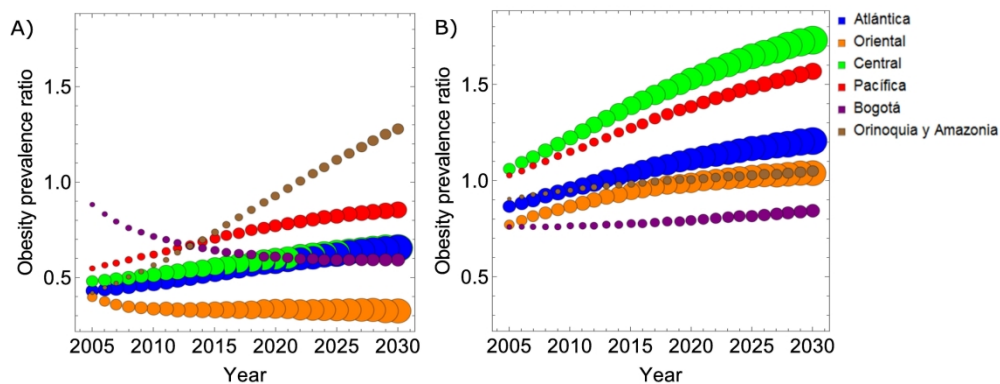

Figure 4. Prevalence ratio of obesity (Lower SES vs Higher SES) amongst urban adults aged 20 to 59 years vs gross domestic product (GDP) per capita at regional level

266x101mm (300 x 300 DPI)

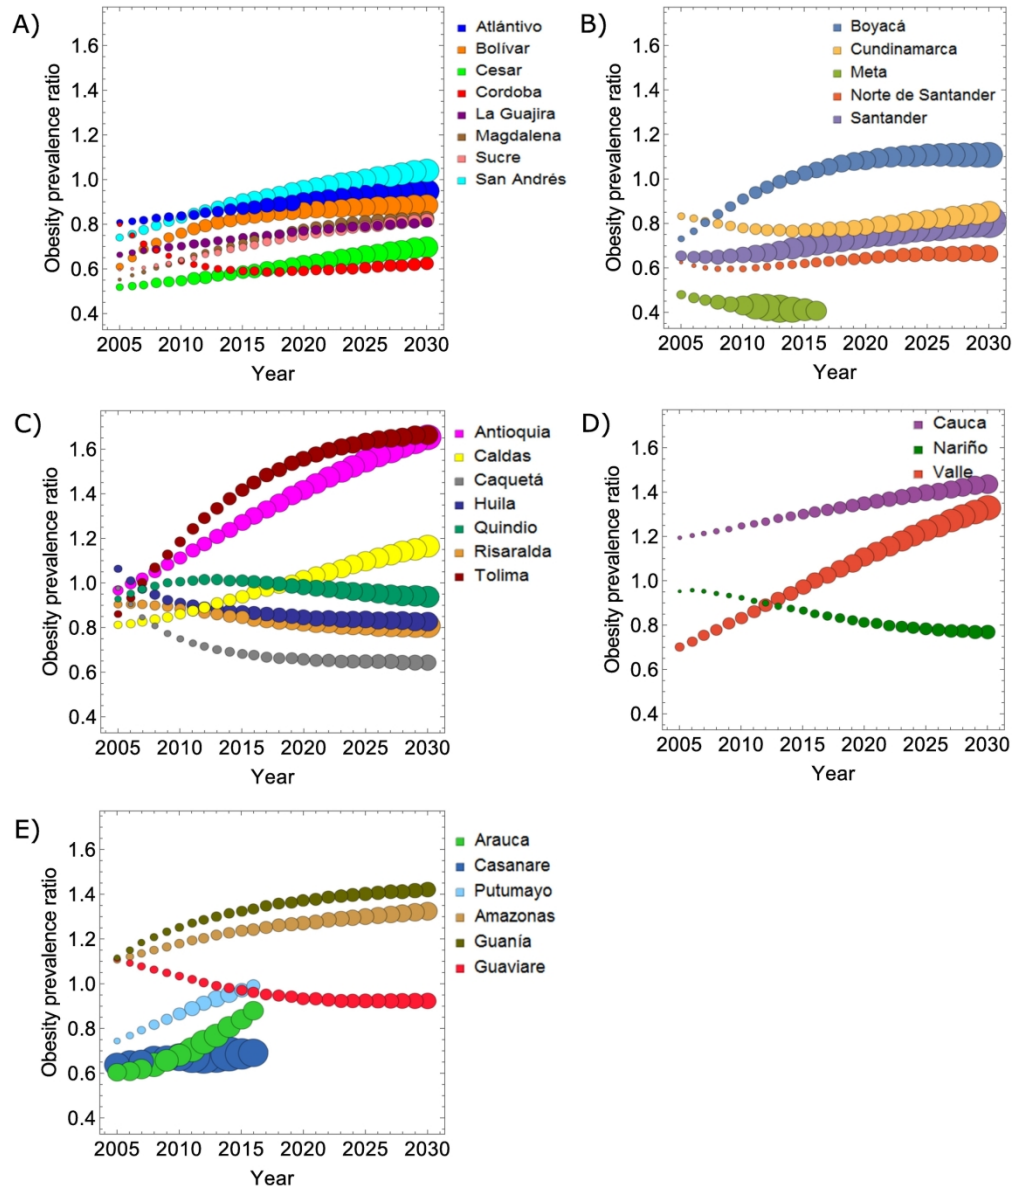

Figure 5. Prevalence ratio of obesity (Lower SES vs Higher SES) amongst urban adults aged 20 to 59 years vs gross domestic product per capita at department level

211x250mm (300 x 300 DPI)

1  
2  
3  
4  
5  
6  
7  
8  
9  
10  
11  
12  
13  
14  
15  
16  
17  
18  
19  
20  
21  
22  
23  
24  
25  
26  
27  
28  
29  
30  
31  
32  
33  
34  
35  
36  
37  
38  
39  
40  
41  
42  
43  
44  
45  
46  
47  
48  
49  
50  
51  
52  
53  
54  
55  
56  
57  
58  
59  
60

1 **Supplementary Information 1**

2 **Supplement to: Understanding the nutritional transition by socioeconomic status in**  
3 **Colombia at different spatial scales.**

For peer review only



1  
2  
3  
4  
5  
6  
7  
8  
9  
10  
11  
12  
13  
14  
15  
16  
17  
18  
19  
20  
21  
22  
23  
24  
25  
26  
27  
28  
29  
30  
31  
32  
33  
34  
35  
36  
37  
38  
39  
40  
41  
42  
43  
44  
45  
46  
47  
48  
49  
50  
51  
52  
53  
54  
55  
56  
57  
58  
59  
60

4 **Table of contents**

5 **Section 1. Model of nutritional stage dynamics** .....3

6 **Section 2. Estimation of transferences rates between nutritional stages by age group, sex, and**

7 **SES group**.....6

8 **References** .....8

For peer review only

## Section 1. Model of nutritional stage dynamics

We developed a population-level system dynamics (SD) model which was based on a validated and calibrated model [1,2]. We used the following set of mathematical forms to study the obesity dynamics by socioeconomic status (SES) and sex at the country level. Specifically, equations (1-3) which correspond to the net rate of change of the population in each body mass index (BMI) category for the age group of zero to four years and equations (4-6) which correspond to the net rate of change of the population in each BMI category for the rest of the age groups:

$$\frac{dN_{0,j,k}(t)}{dt} = B_{N,j,k}(t) + \tau_{4,0,j,k}W_{0,j,k}(t) - \tau_{1,0,j,k}N_{0,j,k}(t) - E_{0,j,k}^N(t)(1 - S_{0,j}) - E_{0,j,k}^N(t)S_{0,j} \quad (1)$$

$$\frac{dW_{0,j,k}(t)}{dt} = B_{W,j,k}(t) + \tau_{1,0,j,k}N_{0,j,k}(t) + \tau_{3,0,j,k}O_{0,j,k}(t) - W_{0,j,k}(t)(\tau_{2,0,j,k} + \tau_{4,0,j,k}) - E_{0,j,k}^W(t)(1 - S_{0,j}) - E_{0,j,k}^W(t)S_{0,j} \quad (2)$$

$$\frac{dO_{0,j,k}(t)}{dt} = B_{O,j,k}(t) + \tau_{2,0,j,k}W_{0,j,k}(t) - \tau_{3,0,j,k}O_{0,j,k}(t) - E_{0,j,k}^O(t)(1 - S_{0,j}) - E_{0,j,k}^O(t)S_{0,j} \quad (3)$$

$$\frac{dN_{i,j,k}(t)}{dt} = E_{i-1,j,k}^N(t)S_{i-1,j} + \tau_{4,i,j,k}W_{i,j,k}(t) - \tau_{1,i,j,k}N_{i,j,k}(t) - E_{i,j,k}^N(t)(1 - S_{i,j}) - E_{i,j,k}^N(t)S_{i,j} \quad (4)$$

$$\frac{dW_{i,j,k}(t)}{dt} = E_{i-1,j,k}^W(t)S_{i-1,j} + \tau_{1,i,j,k}N_{i,j,k}(t) + \tau_{3,i,j,k}O_{i,j,k}(t) - W_{i,j,k}(t)(\tau_{2,i,j,k} + \tau_{4,i,j,k}) - E_{i,j,k}^W(t)(1 - S_{i,j}) - E_{i,j,k}^W(t)S_{i,j} \quad (5)$$

$$\frac{dO_{i,j,k}(t)}{dt} = E_{i-1,j,k}^O(t)S_{i-1,j} + \tau_{2,i,j,k}W_{i,j,k}(t) - \tau_{3,i,j,k}O_{i,j,k}(t) - E_{i,j,k}^O(t)(1 - S_{i,j}) - E_{i,j,k}^O(t)S_{i,j} \quad (6)$$

where  $i \in (0, \dots, 11)$  represents the age groups, in intervals of 5 years,  $j \in (1=\text{men}, 2=\text{women})$  represents the sex, and  $k \in (1=\text{lower}, 2=\text{middle}, \text{and } 3=\text{higher SES})$  represents the SES group of the simulated population;  $N_{i,j,k}(t)$ ,  $W_{i,j,k}(t)$ , and  $O_{i,j,k}(t)$  are the populations of *not-overweight*, *overweight*, and *obese* individuals in the age group  $i$ , sex  $j$  and SES group  $k$ , respectively, at time  $t$  (unit: people);  $B_{N,j,k}(t)$ ,  $B_{W,j,k}(t)$ , and  $B_{O,j,k}(t)$  are the births for each BMI category, sex  $j$ , and SES group  $k$  at time  $t$  (unit: people per year); and  $E_{i,j,k}^N(t)$ ,  $E_{i,j,k}^W(t)$ , and  $E_{i,j,k}^O(t)$  are the exit rates, which correspond to the total number of individuals per year that leave each age group  $i$  for each sex  $j$ , SES group  $k$ , and BMI category at time  $t$  (unit: people per year).  $E_{i,j,k}^N(t)S_{i,j}$ ,  $E_{i,j,k}^W(t)S_{i,j}$ , and  $E_{i,j,k}^O(t)S_{i,j}$  are the individuals who mature into the next age group for each BMI category, age group  $i$ , sex  $j$ , and SES group  $k$ , respectively, at time  $t$  (unit: people per year), and  $E_{i,j,k}^N(t)(1 - S_{i,j})$ ,  $E_{i,j,k}^W(t)(1 - S_{i,j})$ , and  $E_{i,j,k}^O(t)(1 - S_{i,j})$  correspond to the individuals who die for each BMI category, age group  $i$ , sex  $j$ , and SES group  $k$ , respectively, at time  $t$  (unit: people per year).  $S_{i,j}$  is the survival fraction per year for each age group  $i$  and sex  $j$  (unit: % per year). The parameters  $\tau_{1,i,j,k}$  and  $\tau_{2,i,j,k}$  are the transference rates (TRs) that correspond to

1  
2  
3 34 the fraction of individuals per year from the *not overweight* and the *overweight* categories that become  
4  
5 35 *overweight* and *obese* for each age group  $i$ , sex  $j$ , and SES group  $k$ , respectively (unit: % per year). The  
6  
7 36 parameters  $\tau_{3,i,j,k}$  and  $\tau_{4,i,j,k}$  are the TRs of individuals from the *obese* to the *overweight* category and from the  
8  
9 37 *overweight* to the *not overweight* category, respectively, from each age group  $i$ , sex  $j$ , and SES group  $k$ ,  
10  
11 38 respectively (unit: % per year). We used a heuristic to estimate the TRs between BMI categories by age, sex,  
12  
13 39 and SES group using historical data from “Encuesta Nacional de la Situación Nutricional en Colombia”  
14  
15 40 (ENSIN) of 2005 and 2010. This heuristic identifies the TRs that minimize the difference between prevalence  
16  
17 41 rates by BMI category from 2010 ENSIN, and the model estimated prevalence rates by age, sex, and SES group.  
18  
19 42 It does this by comparing ENSIN data from at least two points in time. Figure 1 shows the global view of the  
20  
21 43 SD model structure at the country-level.

22  
23  
24 44 The number of births per year for each BMI category, sex, and SES group was determined using the  
25  
26 45 following equations:

$$27$$

$$28$$

$$29 \quad B_{N,j,k}(t) = \mu_j \theta_{N,j,k} \left( \frac{f(t)}{(Y_F - Y_I + 1)} \right) \sum_{i=Y_I}^{Y_F} (N_{i,2,k}(t) + W_{i,2,k}(t) + O_{i,2,k}(t)) \quad (7)$$

$$30$$

$$31$$

$$32 \quad B_{W,j,k}(t) = \mu_j \theta_{W,j,k} \left( \frac{f(t)}{(Y_F - Y_I + 1)} \right) \sum_{i=Y_I}^{Y_F} (N_{i,2,k}(t) + W_{i,2,k}(t) + O_{i,2,k}(t)) \quad (8)$$

$$33$$

$$34$$

$$35 \quad B_{O,j,k}(t) = \mu_j \theta_{O,j,k} \left( \frac{f(t)}{(Y_F - Y_I + 1)} \right) \sum_{i=Y_I}^{Y_F} (N_{i,2,k}(t) + W_{i,2,k}(t) + O_{i,2,k}(t)) \quad (9)$$

$$36$$

37 49 where  $\mu$  is the total fraction of births by sex  $j$  (unit: % per year);  $\theta_{N,j,k}$ ,  $\theta_{W,j,k}$  and  $\theta_{O,j,k}$  are the fraction  
38  
39 50 of births (percent per year) for each BMI category, sex  $j$ , and SES group  $k$ , respectively, (also assumed to be  
40  
41 51 the prevalence rates of children aged 0 to 12 months, by BMI category);  $\sum_{i=Y_I}^{Y_F} (N_{i,2,k}(t) + W_{i,2,k}(t) + O_{i,2,k}(t))$  is  
42  
43 52 the size of the female population of childbearing age at time  $t$ ;  $f$  is the total number of children born from each  
44  
45 53 woman during the childbearing years (fertility rate) at time  $t$ ; and  $Y_I$  and  $Y_F$  are the first and last childbearing  
46  
47 54 years considered, which we assumed to be 15 to 49, respectively.

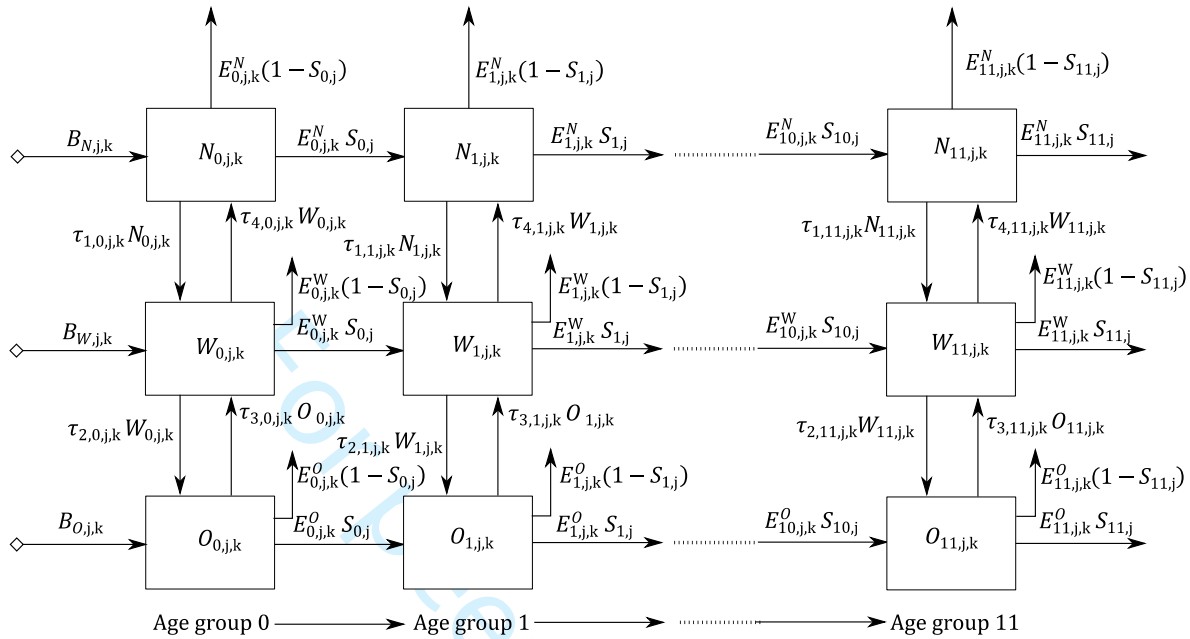

Figure 1. Overview of the SD model structure at country level.

The exit rates per year by BMI category, age group  $i$ , sex  $j$ , and SES group  $k$  were modelled using the following equations:

$$E_{0,j,k}^N(t) = \left( \frac{B_{N,j,k}(t) + \tau_{4,0,j,k}W_0(t) - \tau_{1,0,j,k}N_{0,j,k}(t)}{Y} \right) \quad (10)$$

$$E_{0,j,k}^W(t) = \left( \frac{B_{W,j,k}(t) + \tau_{1,0,j,k}N_{0,j,k}(t) + \tau_{3,0,j,k}O_{0,j,k}(t) - W_{0,j,k}(t)(\tau_{2,0,j,k} + \tau_{4,0,j,k})}{Y} \right) \quad (11)$$

$$E_{0,j,k}^O(t) = \left( \frac{B_{O,j,k}(t) + \tau_{2,0,j,k}W_{0,j,k}(t) - \tau_{3,0,j,k}O_{0,j,k}(t)}{Y} \right) \quad (12)$$

$$E_{i,j,k}^N(t) = \left( \frac{E_{i-1,j,k}^N S_{i-1,j} + \tau_{4,i,j,k}W_{i,j,k}(t) - \tau_{1,i,j,k}N_{i,j,k}(t)}{Y} \right) \quad (13)$$

$$E_{i,j,k}^W(t) = \left( \frac{E_{i-1,j,k}^W S_{i-1,j} + \tau_{1,i,j,k}N_{i,j,k}(t) + \tau_{3,i,j,k}O_{i,j,k}(t) - W_{i,j,k}(t)(\tau_{2,i,j,k} + \tau_{4,i,j,k})}{Y} \right) \quad (14)$$

$$E_{i,j,k}^O(t) = \left( \frac{E_{i-1,j,k}^O S_{i-1,j} + \tau_{2,i,j,k}W_{i,j,k}(t) - \tau_{3,i,j,k}O_{i,j,k}(t)}{Y} \right) \quad (15)$$

where  $Y = 5$  years, corresponding to the average time individuals spend in a given age group before maturing into the next age group. Equations (10-12) correspond to the exit rates per year by BMI category for the age group zero to four years. Finally, the survival fraction for each age group  $i$  and sex  $j$  is determined by:

$$S_{i,j} = \exp(R_{i,j}Y) \quad (16)$$

where,  $R_{i,j}$  is the mortality rate (percent per year) for each age group  $i$  and sex  $j$ .

## Section 2. Estimation of transfereces rates between nutritional stages by age group, sex, and SES group

We used a heuristic, which was based on previously published research [1,2], to estimate the TRs between nutritional stages by age, sex, and SES using historical data obtained from ENSIN of 2005 and 2010. For the purpose of the model, we assumed that the TRs are uniform within each five-year age group, but differed across age groups. The heuristic differs slightly depending on the level of analysis.

We adapted the heuristic to estimate the TRs using prevalence rates by nutritional stage grouped into age groups of 5 years. The heuristic did not use the prevalence rates by nutritional stage for each year between zero and 59 years to estimate the TRs by nutritional stage in 2010 for each age group, sex, and SES group. Instead, we adapted the heuristic to estimate the TRs by nutritional stage in 2010 using prevalence rates by nutritional stage grouped into age groups of five years. Using these estimates, the heuristic approximates the prevalence rates by nutritional stage in 2010 for each age group  $i$ , sex  $j$ , and SES group  $k$  independently using the following system of equations:

$$P'_{i+1,j,k} = A_{i,j,k} \cdot P_{j,k} \quad (1)$$

where

$$B_{i,j,k} = A_{i,j,k} \cdot (A_{i,j,k} \cdot (A_{i,j,k} \cdot (A_{i,j,k} \cdot A_{i,j,k})));$$

$$A_{i,j,k} = \begin{pmatrix} \alpha_{1,i,j,k} - \tau_{1,i,j,k} & \tau_{4,i,j,k} & 0 \\ \tau_{1,i,j,k} & \alpha_{2,i,j,k} - \tau_{2,i,j,k} - \tau_{4,i,j,k} & \tau_{3,i,j,k} \\ 0 & \tau_{2,i,j,k} & \alpha_{3,i,j,k} - \tau_{3,i,j,k} \end{pmatrix}; P'_{i+1,j,k} = \begin{pmatrix} p'_{N10,i+1,j,k} \\ p'_{W10,i+1,j,k} \\ p'_{O10,i+1,j,k} \end{pmatrix};$$

$$P_{i,j,k} = \begin{pmatrix} P_{N05,i,j,k} \\ P_{W05,i,j,k} \\ P_{O05,i,j,k} \end{pmatrix};$$

where  $i \in (0, \dots, 11)$  represents age groups of five years (0–4, 5–9, ..., 55–59);  $j \in (1, 2)$  represents sex (men and women, respectively);  $k \in (1, 2, 3)$  represents the SES groups (lower, middle, and higher SES., respectively);  $P_{N05,i,j,k}$ ,  $P_{W05,i,j,k}$ , and  $P_{O05,i,j,k}$  are the prevalence rates by nutritional stage in 2005 for age group  $i$ , sex  $j$ , and SES group  $k$ ;  $\alpha_{1,i,j,k}$ ,  $\alpha_{2,i,j,k}$ , and  $\alpha_{3,i,j,k}$  are the retention rates for individuals by nutritional stage, age group  $i$ , sex  $j$  and SES group  $k$ , corresponding to the fraction of individuals who remain in the same nutritional stage between 2005 and 2010;  $\tau_{1,i,j,k}$ ,  $\tau_{2,i,j,k}$ ,  $\tau_{3,i,j,k}$ , and  $\tau_{4,i,j,k}$  are the TRs that are used to run the SD model; and  $P'_{N10,i+1,j,k}$ ,  $P'_{W10,i+1,j,k}$ , and  $P'_{O10,i+1,j,k}$  are the estimated prevalence rates by nutritional stage in 2010 for age group  $i$ , sex  $j$ , and SES group  $k$  five years later. The matrix  $A_{i,j,k}$  represents the equations used to calculate the estimated prevalence rates by nutritional stage in the year  $t+1$  for age group  $i$ , sex  $j$ , and SES group  $k$ , where  $t$  is 2005. The heuristic estimates the TRs aggregated over five years.

Then, the heuristic calculates the TRs by nutritional stage for each age group, sex, and SES group by minimizing the difference between prevalence rates by nutritional stage reported in the 2010 ENSIN and the estimated 2010 prevalence rates informed by data from the 2005 ENSIN. Specifically, the TRs were estimated by solving the system of equations (1) for each age group  $i$ , sex  $j$ , and SES group  $k$  independently, and minimizing the following equation:

1  
2  
3  
4  
5  
6  
7

$$109 \quad \text{Min } QD_{i,j,k} = \left[ (P_{N10,i+1,j,k} - p'_{N10,i+1,j,k})^2 + (P_{W10,i+1,j,k} - p'_{W10,i+1,j,k})^2 + (P_{O10,i+1,j,k} - p'_{O10,i+1,j,k})^2 \right]$$

8  
9

110 with the restrictions

11  
12

$$111 \quad \alpha_{1,i,j,k} + \tau_{1,i,j,k} = 1$$

13  
14  
15

$$112 \quad \alpha_{2,i,j,k} + \tau_{2,i,j,k} + \tau_{4,i,j,k} = 1$$

16  
17  
18

$$113 \quad \alpha_{3,i,j,k} + \tau_{3,i,j,k} = 1 \quad (3)$$

19  
20  
21  
22

$$114 \quad 0 \leq \alpha_{l,i,j,k} \leq 1, \quad (l = 1, 2, 3)$$

23  
24  
25

$$115 \quad 0 \leq \tau_{m,i,j,k} \leq 1, \quad (m = 1, 2, 3, 4)$$

26  
27  
28

116

117 where  $P_{N10,i+1,i,j,k}$ ,  $P_{W10,i+1,i,j,k}$ , and  $P_{O10,i+1,i,j,k}$  are the prevalence rates by nutritional stage and age  $i$  in  
118 2010 for age group  $i+1$ , sex  $j$  and SES group  $k$ . At the department level, we did not include sex to estimate the  
119 TRs between nutritional stages; the sub index sex is therefore not included. We made these adaptations in the  
120 heuristic at the country, regional, and state levels because the ENSIN 2005 and 2010 data could not be used to  
121 generate good estimates of TRs by nutritional stage, age group, sex, and SES at the different spatial scales.

## References

- 1 Meisel JD, Sarmiento OL, Olaya C, *et al.* Towards a novel model for studying the nutritional stage dynamics of the Colombian population by age and socioeconomic status. *PLOS ONE* 2018;**13**:e0191929. doi:10.1371/journal.pone.0191929
- 2 Meisel JD, Sarmiento OL, Olaya C, *et al.* A system dynamics model of the nutritional stages of the Colombian population. *Kybernetics* 2016;**45**:554–70. doi:http://dx.doi.org/10.1108/K-01-2015-0010

For peer review only

1  
2  
3 **Supplementary Information 2**  
4

5 **Supplement to: Understanding the nutritional transition by socioeconomic status in**  
6 **Colombia at different spatial scales.**  
7  
8  
9

10  
11  
12  
13  
14  
15  
16  
17  
18  
19  
20  
21  
22  
23  
24  
25  
26  
27  
28  
29  
30  
31  
32  
33  
34  
35  
36  
37  
38  
39  
40  
41  
42  
43  
44  
45  
46  
47  
48  
49  
50  
51  
52  
53  
54  
55  
56  
57  
58  
59  
60

For peer review only



1  
2  
3  
4  
5  
6  
7  
8  
9  
10  
11  
12  
13  
14  
15  
16  
17  
18  
19  
20  
21  
22  
23  
24  
25  
26  
27  
28  
29  
30  
31  
32  
33  
34  
35  
36  
37  
38  
39  
40  
41  
42  
43  
44  
45  
46  
47  
48  
49  
50  
51  
52  
53  
54  
55  
56  
57  
58  
59  
60

**Table of contents**

**Section 1. Parameters and data used in the model** .....3

**References** .....9

For peer review only

## Section 1. Parameters and data used in the model at national level

The following tables describe the data and parameters used in the two system dynamics (SD) models: SD model of the entire urban population and SD model segregated by socioeconomic status (SES) and to estimate the transference rates (TRs) by age, body mass index (BMI) category, and socioeconomic status (SES) at national level.

**Table 1. Prevalent rates of entire population by age group, sex, and body mass index category in 2005**

| Age Group | Males         |           |         | Females       |           |         |
|-----------|---------------|-----------|---------|---------------|-----------|---------|
|           | Not-Overweigh | Overweigh | Obese   | Not-Overweigh | Overweigh | Obese   |
| 0-4       | 0.76105       | 0.18357   | 0.05537 | 0.76409       | 0.18858   | 0.04733 |
| 5-9       | 0.80877       | 0.13750   | 0.05373 | 0.79520       | 0.15043   | 0.05437 |
| 10-14     | 0.83260       | 0.12485   | 0.04255 | 0.78549       | 0.17204   | 0.04248 |
| 15-19     | 0.89431       | 0.08268   | 0.02301 | 0.79172       | 0.16285   | 0.04543 |
| 20-24     | 0.76938       | 0.18236   | 0.04825 | 0.69604       | 0.22307   | 0.08089 |
| 25-29     | 0.62451       | 0.29679   | 0.07870 | 0.56640       | 0.29998   | 0.13362 |
| 30-34     | 0.50047       | 0.38605   | 0.11349 | 0.45741       | 0.36278   | 0.17981 |
| 35-39     | 0.45259       | 0.40518   | 0.14223 | 0.38965       | 0.39887   | 0.21148 |
| 40-44     | 0.42614       | 0.42564   | 0.14822 | 0.34379       | 0.40650   | 0.24971 |
| 45-49     | 0.39921       | 0.43704   | 0.16375 | 0.28923       | 0.42900   | 0.28178 |
| 50-54     | 0.41231       | 0.42621   | 0.16148 | 0.25499       | 0.41586   | 0.32915 |
| 55-59     | 0.40721       | 0.41261   | 0.18018 | 0.24122       | 0.40478   | 0.35400 |

**Table 2. Prevalent rates of lower socioeconomic status population by age group, sex, and body mass index category in 2005**

| Age Group | Males         |           |         | Females       |           |         |
|-----------|---------------|-----------|---------|---------------|-----------|---------|
|           | Not-Overweigh | Overweigh | Obese   | Not-Overweigh | Overweigh | Obese   |
| 0-4       | 0.78395       | 0.17452   | 0.04153 | 0.80653       | 0.16199   | 0.03148 |
| 5-9       | 0.85783       | 0.11623   | 0.02594 | 0.88696       | 0.09565   | 0.01739 |
| 10-14     | 0.88310       | 0.09725   | 0.01965 | 0.85980       | 0.12157   | 0.01863 |
| 15-19     | 0.94111       | 0.04837   | 0.01052 | 0.81461       | 0.15890   | 0.02648 |
| 20-24     | 0.81901       | 0.14257   | 0.03842 | 0.74058       | 0.20072   | 0.05870 |
| 25-29     | 0.70429       | 0.24785   | 0.04785 | 0.60337       | 0.27862   | 0.11801 |
| 30-34     | 0.58651       | 0.33138   | 0.08211 | 0.52023       | 0.33430   | 0.14547 |
| 35-39     | 0.58167       | 0.33333   | 0.08500 | 0.43189       | 0.36529   | 0.20283 |
| 40-44     | 0.56743       | 0.34326   | 0.08932 | 0.40071       | 0.38526   | 0.21403 |
| 45-49     | 0.52083       | 0.35000   | 0.12917 | 0.33531       | 0.43175   | 0.23294 |
| 50-54     | 0.53915       | 0.35123   | 0.10962 | 0.37478       | 0.36778   | 0.25744 |
| 55-59     | 0.57049       | 0.30492   | 0.12459 | 0.37705       | 0.35597   | 0.26698 |

**Table 3. Prevalent rates of middle socioeconomic status population by age group, sex, and body mass index category in 2005**

| Age Group | Males         |           |         | Females       |           |         |
|-----------|---------------|-----------|---------|---------------|-----------|---------|
|           | Not-Overweigh | Overweigh | Obese   | Not-Overweigh | Overweigh | Obese   |
| 0-4       | 0.74688       | 0.19067   | 0.06245 | 0.77889       | 0.18121   | 0.03990 |
| 5-9       | 0.82955       | 0.12074   | 0.04972 | 0.81805       | 0.12870   | 0.05325 |
| 10-14     | 0.81556       | 0.13689   | 0.04755 | 0.82092       | 0.13725   | 0.04183 |
| 15-19     | 0.88358       | 0.08657   | 0.02985 | 0.82485       | 0.13964   | 0.03550 |
| 20-24     | 0.77792       | 0.18020   | 0.04188 | 0.73680       | 0.19760   | 0.06560 |
| 25-29     | 0.61250       | 0.29306   | 0.09444 | 0.61466       | 0.28448   | 0.10086 |
| 30-34     | 0.50252       | 0.38319   | 0.11429 | 0.46230       | 0.37004   | 0.16766 |
| 35-39     | 0.44158       | 0.41065   | 0.14777 | 0.44085       | 0.35996   | 0.19919 |
| 40-44     | 0.45601       | 0.39856   | 0.14542 | 0.35722       | 0.40728   | 0.23549 |

| Age Group | Males         |           |         | Females       |           |         |
|-----------|---------------|-----------|---------|---------------|-----------|---------|
|           | Not-Overweigh | Overweigh | Obese   | Not-Overweigh | Overweigh | Obese   |
| 45-49     | 0.41702       | 0.41489   | 0.16809 | 0.27633       | 0.43371   | 0.28996 |
| 50-54     | 0.44875       | 0.41274   | 0.13850 | 0.27040       | 0.39520   | 0.33440 |
| 55-59     | 0.38931       | 0.43130   | 0.17939 | 0.28884       | 0.38512   | 0.32604 |

**Table 4. Prevalent rates of higher socioeconomic status population by age group, sex, and body mass index category in 2005**

| Age Group | Males         |           |         | Females       |           |         |
|-----------|---------------|-----------|---------|---------------|-----------|---------|
|           | Not-Overweigh | Overweigh | Obese   | Not-Overweigh | Overweigh | Obese   |
| 0-4       | 0.74297       | 0.18935   | 0.06768 | 0.74901       | 0.19337   | 0.05762 |
| 5-9       | 0.72519       | 0.18066   | 0.09415 | 0.76679       | 0.17827   | 0.05495 |
| 10-14     | 0.78177       | 0.15019   | 0.06804 | 0.78082       | 0.16895   | 0.05023 |
| 15-19     | 0.85472       | 0.11453   | 0.03075 | 0.82160       | 0.14789   | 0.03052 |
| 20-24     | 0.72394       | 0.21580   | 0.06026 | 0.76407       | 0.18831   | 0.04762 |
| 25-29     | 0.56919       | 0.33857   | 0.09225 | 0.66329       | 0.24911   | 0.08760 |
| 30-34     | 0.43184       | 0.43070   | 0.13746 | 0.53989       | 0.31589   | 0.14422 |
| 35-39     | 0.37037       | 0.45139   | 0.17824 | 0.45560       | 0.37591   | 0.16849 |
| 40-44     | 0.31415       | 0.49712   | 0.18872 | 0.39926       | 0.38755   | 0.21319 |
| 45-49     | 0.31790       | 0.50061   | 0.18149 | 0.28693       | 0.42549   | 0.28758 |
| 50-54     | 0.31294       | 0.48080   | 0.20626 | 0.24415       | 0.44150   | 0.31435 |
| 55-59     | 0.32413       | 0.46409   | 0.21179 | 0.23613       | 0.42381   | 0.34006 |

**Table 5. Prevalent rates of entire population by age group, sex, and body mass index category in 2010**

| Age Group | Males         |           |         | Females       |           |         |
|-----------|---------------|-----------|---------|---------------|-----------|---------|
|           | Not-Overweigh | Overweigh | Obese   | Not-Overweigh | Overweigh | Obese   |
| 0-4       | 0.73680       | 0.20456   | 0.05864 | 0.76409       | 0.18858   | 0.04733 |
| 5-9       | 0.76332       | 0.15196   | 0.08472 | 0.79520       | 0.15043   | 0.05437 |
| 10-14     | 0.77794       | 0.15256   | 0.06950 | 0.78549       | 0.17204   | 0.04248 |
| 15-19     | 0.85366       | 0.11398   | 0.03236 | 0.79172       | 0.16285   | 0.04543 |
| 20-24     | 0.73185       | 0.20473   | 0.06342 | 0.69604       | 0.22307   | 0.08089 |
| 25-29     | 0.53510       | 0.34540   | 0.11950 | 0.56640       | 0.29998   | 0.13362 |
| 30-34     | 0.44255       | 0.39099   | 0.16646 | 0.45741       | 0.36278   | 0.17981 |
| 35-39     | 0.39937       | 0.42872   | 0.17191 | 0.38965       | 0.39887   | 0.21148 |
| 40-44     | 0.36702       | 0.44594   | 0.18704 | 0.34379       | 0.40650   | 0.24971 |
| 45-49     | 0.37109       | 0.44759   | 0.18132 | 0.28923       | 0.42900   | 0.28178 |
| 50-54     | 0.36376       | 0.45504   | 0.18120 | 0.25499       | 0.41586   | 0.32915 |
| 55-59     | 0.38500       | 0.43760   | 0.17739 | 0.24122       | 0.40478   | 0.35400 |

**Table 6. Prevalent rates of lower socioeconomic status population by age group, sex, and body mass index category in 2010**

| Age Group | Males         |           |         | Females       |           |         |
|-----------|---------------|-----------|---------|---------------|-----------|---------|
|           | Not-Overweigh | Overweigh | Obese   | Not-Overweigh | Overweigh | Obese   |
| 0-4       | 0.73872       | 0.21008   | 0.05120 | 0.76813       | 0.18952   | 0.04235 |
| 5-9       | 0.81081       | 0.13745   | 0.05174 | 0.84693       | 0.11389   | 0.03918 |
| 10-14     | 0.83917       | 0.11708   | 0.04375 | 0.81566       | 0.14739   | 0.03695 |
| 15-19     | 0.88342       | 0.09347   | 0.02312 | 0.78310       | 0.17442   | 0.04248 |
| 20-24     | 0.76115       | 0.17639   | 0.06246 | 0.66899       | 0.23826   | 0.09275 |
| 25-29     | 0.56088       | 0.33523   | 0.10390 | 0.52527       | 0.31441   | 0.16032 |
| 30-34     | 0.50181       | 0.35481   | 0.14338 | 0.40909       | 0.37216   | 0.21875 |
| 35-39     | 0.46410       | 0.37565   | 0.16025 | 0.36917       | 0.39763   | 0.23320 |
| 40-44     | 0.41073       | 0.42059   | 0.16867 | 0.32658       | 0.39517   | 0.27825 |
| 45-49     | 0.45012       | 0.39549   | 0.15439 | 0.29107       | 0.39097   | 0.31796 |
| 50-54     | 0.45231       | 0.39740   | 0.15029 | 0.27503       | 0.40484   | 0.32013 |
| 55-59     | 0.47929       | 0.39842   | 0.12229 | 0.28418       | 0.38556   | 0.33026 |

**Table 7. Prevalent rates of middle socioeconomic status population by age group, sex, and body mass index category in 2010**

| Age Group | Males         |           |         | Females       |           |         |
|-----------|---------------|-----------|---------|---------------|-----------|---------|
|           | Not-Overweigh | Overweigh | Obese   | Not-Overweigh | Overweigh | Obese   |
| 0-4       | 0.74826       | 0.19360   | 0.05814 | 0.77592       | 0.18416   | 0.03992 |
| 5-9       | 0.76653       | 0.15307   | 0.08041 | 0.79742       | 0.14988   | 0.05269 |
| 10-14     | 0.78466       | 0.15682   | 0.05852 | 0.78575       | 0.17370   | 0.04055 |
| 15-19     | 0.85288       | 0.11458   | 0.03254 | 0.80732       | 0.14946   | 0.04322 |
| 20-24     | 0.74719       | 0.19654   | 0.05628 | 0.69790       | 0.22132   | 0.08079 |
| 25-29     | 0.55112       | 0.32522   | 0.12366 | 0.57692       | 0.29487   | 0.12821 |
| 30-34     | 0.44526       | 0.38421   | 0.17053 | 0.45881       | 0.36490   | 0.17629 |
| 35-39     | 0.39230       | 0.45608   | 0.15162 | 0.38689       | 0.37377   | 0.23934 |
| 40-44     | 0.37437       | 0.42839   | 0.19724 | 0.35059       | 0.38285   | 0.26655 |
| 45-49     | 0.37736       | 0.45687   | 0.16577 | 0.27349       | 0.42326   | 0.30326 |
| 50-54     | 0.38679       | 0.43962   | 0.17358 | 0.25197       | 0.38583   | 0.36220 |
| 55-59     | 0.39286       | 0.42634   | 0.18080 | 0.24806       | 0.37209   | 0.37984 |

**Table 8. Prevalent rates of higher socioeconomic status population by age group, sex, and body mass index category in 2010**

| Age Group | Males         |           |         | Females       |           |         |
|-----------|---------------|-----------|---------|---------------|-----------|---------|
|           | Not-Overweigh | Overweigh | Obese   | Not-Overweigh | Overweigh | Obese   |
| 0-4       | 0.72199       | 0.20775   | 0.07026 | 0.74656       | 0.19149   | 0.06195 |
| 5-9       | 0.69791       | 0.17015   | 0.13194 | 0.72241       | 0.20088   | 0.07671 |
| 10-14     | 0.70526       | 0.18810   | 0.10664 | 0.75157       | 0.19821   | 0.05022 |
| 15-19     | 0.82515       | 0.13360   | 0.04126 | 0.78875       | 0.16144   | 0.04981 |
| 20-24     | 0.69251       | 0.23779   | 0.06971 | 0.71908       | 0.21069   | 0.07023 |
| 25-29     | 0.49887       | 0.37040   | 0.13073 | 0.59451       | 0.29121   | 0.11429 |
| 30-34     | 0.38442       | 0.43065   | 0.18493 | 0.49567       | 0.35355   | 0.15078 |
| 35-39     | 0.34673       | 0.45514   | 0.19813 | 0.40641       | 0.41729   | 0.17630 |
| 40-44     | 0.33097       | 0.47518   | 0.19385 | 0.35115       | 0.42872   | 0.22013 |
| 45-49     | 0.30837       | 0.48018   | 0.21145 | 0.29707       | 0.45293   | 0.25000 |
| 50-54     | 0.28793       | 0.50464   | 0.20743 | 0.24590       | 0.43735   | 0.31674 |
| 55-59     | 0.32332       | 0.46755   | 0.20913 | 0.21780       | 0.42909   | 0.35311 |

**Table 9. Fraction of births by body mass index category, sex, and socioeconomic status<sup>†</sup>**

| Population Group (%/year) | Males         |           |       | Females       |           |       |
|---------------------------|---------------|-----------|-------|---------------|-----------|-------|
|                           | Not-Overweigh | Overweigh | Obese | Not-Overweigh | Overweigh | Obese |
| Lower SES                 | 82.26         | 12.60     | 5.14  | 82.26         | 12.60     | 5.14  |
| Middle SES                | 77.87         | 13.11     | 9.02  | 77.87         | 13.11     | 9.02  |
| Higher SES                | 77.90         | 16.67     | 5.43  | 77.90         | 16.67     | 5.43  |
| Complete Urban Population | 79.76         | 13.97     | 6.27  | 79.76         | 13.97     | 6.27  |

<sup>†</sup> The fractions of births by each BMI category correspond to the prevalences by BMI category of children aged 0 to 12 months

**Table 10. Man mortality rates and population size by age group without segregate by socioeconomic status<sup>†</sup>**

| Age group | Mortality rates (R) (%/year) | Not- overweight men in 2005 (Number of people) <sup>1</sup> | Overweight men in 2005 (Number of people) <sup>2</sup> | Obese men in 2005 (Number of people) <sup>3</sup> |
|-----------|------------------------------|-------------------------------------------------------------|--------------------------------------------------------|---------------------------------------------------|
| 0-4       | 0,00357                      | 1165482                                                     | 281127                                                 | 84801                                             |
| 5-9       | 0,00032                      | 1289072                                                     | 219149                                                 | 85644                                             |
| 10-14     | 0,00033                      | 1359604                                                     | 203875                                                 | 69488                                             |
| 15-19     | 0,00155                      | 1374888                                                     | 127116                                                 | 35377                                             |
| 20-24     | 0,00293                      | 1058824                                                     | 250967                                                 | 66405                                             |
| 25-29     | 0,00305                      | 771818                                                      | 366795                                                 | 97264                                             |
| 30-34     | 0,00296                      | 541980                                                      | 418070                                                 | 122902                                            |
| 35-39     | 0,00284                      | 489080                                                      | 437848                                                 | 153696                                            |
| 40-44     | 0,00310                      | 436635                                                      | 436122                                                 | 151873                                            |
| 45-49     | 0,00384                      | 337634                                                      | 369630                                                 | 138492                                            |
| 50-54     | 0,00574                      | 276901                                                      | 286235                                                 | 108449                                            |
| 55-59     | 0,00798                      | 210765                                                      | 213563                                                 | 93259                                             |

†Values used in this table are for the urban population

<sup>1</sup> Initial value used in the stock of not-overweight population in 2005.

<sup>2</sup> Initial value used in the stock of overweight population in 2005.

<sup>3</sup> Initial value used in the stock of obese population in 2005.

**Table 11. Women mortality rates and population size by age group without segregate by socioeconomic status<sup>†</sup>**

| Age group | Mortality rates (R) (%/year) | Not- overweight women in 2005 (Number of people) <sup>1</sup> | Overweight women in 2005 (Number of people) <sup>2</sup> | Obese women in 2005 (Number of people) <sup>3</sup> |
|-----------|------------------------------|---------------------------------------------------------------|----------------------------------------------------------|-----------------------------------------------------|
| 0-4       | 0,00289                      | 1126474                                                       | 278023                                                   | 69772                                               |
| 5-9       | 0,00023                      | 1227412                                                       | 232199                                                   | 83921                                               |
| 10-14     | 0,00024                      | 1244635                                                       | 272604                                                   | 67304                                               |
| 15-19     | 0,00049                      | 1219614                                                       | 250871                                                   | 69976                                               |
| 20-24     | 0,00066                      | 1026858                                                       | 329092                                                   | 119328                                              |
| 25-29     | 0,00065                      | 762616                                                        | 403902                                                   | 179915                                              |
| 30-34     | 0,00085                      | 552648                                                        | 438307                                                   | 217248                                              |
| 35-39     | 0,00107                      | 480958                                                        | 492333                                                   | 261042                                              |
| 40-44     | 0,00146                      | 403077                                                        | 476607                                                   | 292781                                              |
| 45-49     | 0,00218                      | 285037                                                        | 422785                                                   | 277697                                              |
| 50-54     | 0,00337                      | 199382                                                        | 325166                                                   | 257368                                              |
| 55-59     | 0,00523                      | 146397                                                        | 245658                                                   | 214837                                              |

†Values used in this table are for the urban population

<sup>1</sup> Initial value used in the stock of not-overweight population in 2005.

<sup>2</sup> Initial value used in the stock of overweight population in 2005.

<sup>3</sup> Initial value used in the stock of obese population in 2005.

**Table 12. Man mortality rates and population size by age group for the lower socioeconomic status population<sup>†</sup>**

| Age group | Mortality rates (R) (%/year) | Not- overweight men in 2005 (Number of people) <sup>1</sup> | Overweight men in 2005 (Number of people) <sup>2</sup> | Obese men in 2005 (Number of people) <sup>3</sup> |
|-----------|------------------------------|-------------------------------------------------------------|--------------------------------------------------------|---------------------------------------------------|
| 0-4       | 0,00357                      | 497762                                                      | 110812                                                 | 26367                                             |
| 5-9       | 0,00032                      | 562355                                                      | 76198                                                  | 17003                                             |
| 10-14     | 0,00033                      | 589337                                                      | 64899                                                  | 13111                                             |
| 15-19     | 0,00155                      | 536644                                                      | 27582                                                  | 5996                                              |
| 20-24     | 0,00293                      | 370955                                                      | 64574                                                  | 17403                                             |
| 25-29     | 0,00305                      | 277758                                                      | 97748                                                  | 18872                                             |
| 30-34     | 0,00296                      | 201479                                                      | 113836                                                 | 28207                                             |
| 35-39     | 0,00284                      | 184329                                                      | 105633                                                 | 26936                                             |

|       |         |        |        |       |
|-------|---------|--------|--------|-------|
| 40-44 | 0,00310 | 166239 | 100565 | 26167 |
| 45-49 | 0,00384 | 119390 | 80230  | 29609 |
| 50-54 | 0,00574 | 107116 | 69781  | 21779 |
| 55-59 | 0,00798 | 497762 | 110812 | 26367 |

†Values used in this table are for the urban population

<sup>1</sup> Initial value used in the stock of not-overweight population in 2005 for lower SES.

<sup>2</sup> Initial value used in the stock of overweight population in 2005 for lower SES.

<sup>3</sup> Initial value used in the stock of obese population in 2005 for lower SES.

**Table 13. Women mortality rates and population size by age group for the lower socioeconomic status population†**

| Age group | Mortality rates (R) (%/year) | Not- overweight women in 2005 (Number of people) <sup>1</sup> | Overweight women in 2005 (Number of people) <sup>2</sup> | Obese women in 2005 (Number of people) <sup>3</sup> |
|-----------|------------------------------|---------------------------------------------------------------|----------------------------------------------------------|-----------------------------------------------------|
| 0-4       | 0,00289                      | 492988                                                        | 99017                                                    | 19244                                               |
| 5-9       | 0,00023                      | 563089                                                        | 60725                                                    | 11041                                               |
| 10-14     | 0,00024                      | 556772                                                        | 78723                                                    | 12062                                               |
| 15-19     | 0,00049                      | 465440                                                        | 90792                                                    | 15132                                               |
| 20-24     | 0,00066                      | 359582                                                        | 97460                                                    | 28499                                               |
| 25-29     | 0,00065                      | 259242                                                        | 119709                                                   | 50705                                               |
| 30-34     | 0,00085                      | 199380                                                        | 128120                                                   | 55753                                               |
| 35-39     | 0,00107                      | 156332                                                        | 132225                                                   | 73418                                               |
| 40-44     | 0,00146                      | 134336                                                        | 129154                                                   | 71752                                               |
| 45-49     | 0,00218                      | 89565                                                         | 115324                                                   | 62220                                               |
| 50-54     | 0,00337                      | 86692                                                         | 85072                                                    | 59550                                               |
| 55-59     | 0,00523                      | 62876                                                         | 59361                                                    | 44521                                               |

†Values used in this table are for the urban population

<sup>1</sup> Initial value used in the stock of not-overweight population in 2005 for lower SES.

<sup>2</sup> Initial value used in the stock of overweight population in 2005 for lower SES.

<sup>3</sup> Initial value used in the stock of obese population in 2005 for lower SES.

**Table 14. Man mortality rates and population size by age group for the middle socioeconomic status population†**

| Age group | Mortality rates (R) (%/year) | Not- overweight men in 2005 (Number of people) <sup>1</sup> | Overweight men in 2005 (Number of people) <sup>2</sup> | Obese men in 2005 (Number of people) <sup>3</sup> |
|-----------|------------------------------|-------------------------------------------------------------|--------------------------------------------------------|---------------------------------------------------|
| 0-4       | 0,00357                      | 319608                                                      | 81594                                                  | 26723                                             |
| 5-9       | 0,00032                      | 367767                                                      | 53528                                                  | 22041                                             |
| 10-14     | 0,00033                      | 371039                                                      | 62277                                                  | 21633                                             |
| 15-19     | 0,00155                      | 354964                                                      | 34777                                                  | 11992                                             |
| 20-24     | 0,00293                      | 280735                                                      | 65032                                                  | 15113                                             |
| 25-29     | 0,00305                      | 213399                                                      | 102103                                                 | 32905                                             |
| 30-34     | 0,00296                      | 150606                                                      | 114843                                                 | 34252                                             |
| 35-39     | 0,00284                      | 135738                                                      | 126231                                                 | 45422                                             |
| 40-44     | 0,00310                      | 130323                                                      | 113905                                                 | 41560                                             |
| 45-49     | 0,00384                      | 93601                                                       | 93124                                                  | 37727                                             |
| 50-54     | 0,00574                      | 72003                                                       | 66225                                                  | 22223                                             |
| 55-59     | 0,00798                      | 47562                                                       | 52691                                                  | 21916                                             |

†Values used in this table are for the urban population

<sup>1</sup> Initial value used in the stock of not-overweight population in 2005 for middle SES.

<sup>2</sup> Initial value used in the stock of overweight population in 2005 for middle SES.

<sup>3</sup> Initial value used in the stock of obese population in 2005 for middle SES.

**Table 15. Women mortality rates and population size by age group for the middle socioeconomic status population<sup>†</sup>**

| Age group | Mortality rates (R) (%/year) | Not- overweight women in 2005 (Number of people) <sup>1</sup> | Overweight women in 2005 (Number of people) <sup>2</sup> | Obese women in 2005 (Number of people) <sup>3</sup> |
|-----------|------------------------------|---------------------------------------------------------------|----------------------------------------------------------|-----------------------------------------------------|
| 0-4       | 0,00289                      | 320869                                                        | 74652                                                    | 16437                                               |
| 5-9       | 0,00023                      | 351216                                                        | 55255                                                    | 22864                                               |
| 10-14     | 0,00024                      | 362400                                                        | 60592                                                    | 18466                                               |
| 15-19     | 0,00049                      | 332035                                                        | 56212                                                    | 14291                                               |
| 20-24     | 0,00066                      | 285040                                                        | 76444                                                    | 25378                                               |
| 25-29     | 0,00065                      | 233307                                                        | 107982                                                   | 38285                                               |
| 30-34     | 0,00085                      | 154577                                                        | 123728                                                   | 56059                                               |
| 35-39     | 0,00107                      | 154789                                                        | 126387                                                   | 69939                                               |
| 40-44     | 0,00146                      | 116820                                                        | 133190                                                   | 77012                                               |
| 45-49     | 0,00218                      | 72273                                                         | 113433                                                   | 75838                                               |
| 50-54     | 0,00337                      | 50514                                                         | 73828                                                    | 62470                                               |
| 55-59     | 0,00523                      | 41376                                                         | 55168                                                    | 46705                                               |

<sup>†</sup>Values used in this table are for the urban population

<sup>1</sup> Initial value used in the stock of not-overweight population in 2005 for middle SES.

<sup>2</sup> Initial value used in the stock of overweight population in 2005 for middle SES.

<sup>3</sup> Initial value used in the stock of obese population in 2005 for middle SES.

**Table 16. Man mortality rates and population size by age group for the higher socioeconomic status population<sup>†</sup>**

| Age group | Mortality rates (R) (%/year) | Not- overweight men in 2005 (Number of people) <sup>1</sup> | Overweight men in 2005 (Number of people) <sup>2</sup> | Obese men in 2005 (Number of people) <sup>3</sup> |
|-----------|------------------------------|-------------------------------------------------------------|--------------------------------------------------------|---------------------------------------------------|
| 0-4       | 0,00357                      | 348113                                                      | 88721                                                  | 31711                                             |
| 5-9       | 0,00032                      | 358950                                                      | 89423                                                  | 46601                                             |
| 10-14     | 0,00033                      | 399228                                                      | 76699                                                  | 34744                                             |
| 15-19     | 0,00155                      | 483279                                                      | 64757                                                  | 17388                                             |
| 20-24     | 0,00293                      | 407134                                                      | 121362                                                 | 33890                                             |
| 25-29     | 0,00305                      | 280661                                                      | 166945                                                 | 45486                                             |
| 30-34     | 0,00296                      | 189894                                                      | 189391                                                 | 60444                                             |
| 35-39     | 0,00284                      | 169012                                                      | 205984                                                 | 81337                                             |
| 40-44     | 0,00310                      | 140072                                                      | 221653                                                 | 84146                                             |
| 45-49     | 0,00384                      | 124643                                                      | 196277                                                 | 71156                                             |
| 50-54     | 0,00574                      | 97782                                                       | 150229                                                 | 64447                                             |
| 55-59     | 0,00798                      | 82068                                                       | 117506                                                 | 53624                                             |

<sup>†</sup>Values used in this table are for the urban population

<sup>1</sup> Initial value used in the stock of not-overweight population in 2005 for higher SES.

<sup>2</sup> Initial value used in the stock of overweight population in 2005 for higher SES.

<sup>3</sup> Initial value used in the stock of obese population in 2005 for higher SES.

**Table 17. Women mortality rates and population size by age group for the higher socioeconomic status population<sup>†</sup>**

| Age group | Mortality rates (R) (%/year) | Not- overweight women in 2005 (Number of people) <sup>1</sup> | Overweight women in 2005 (Number of people) <sup>2</sup> | Obese women in 2005 (Number of people) <sup>3</sup> |
|-----------|------------------------------|---------------------------------------------------------------|----------------------------------------------------------|-----------------------------------------------------|
| 0-4       | 0,00289                      | 337851                                                        | 87222                                                    | 25989                                               |
| 5-9       | 0,00023                      | 367555                                                        | 85451                                                    | 26338                                               |
| 10-14     | 0,00024                      | 386919                                                        | 83719                                                    | 24890                                               |
| 15-19     | 0,00049                      | 465482                                                        | 83787                                                    | 17289                                               |
| 20-24     | 0,00066                      | 460639                                                        | 113529                                                   | 28708                                               |
| 25-29     | 0,00065                      | 356321                                                        | 133820                                                   | 47061                                               |

|              |         |        |        |        |
|--------------|---------|--------|--------|--------|
| <b>30-34</b> | 0,00085 | 264860 | 154972 | 70755  |
| <b>35-39</b> | 0,00107 | 237476 | 195942 | 87825  |
| <b>40-44</b> | 0,00146 | 203703 | 197731 | 108768 |
| <b>45-49</b> | 0,00218 | 131088 | 194393 | 131387 |
| <b>50-54</b> | 0,00337 | 88819  | 160613 | 114358 |
| <b>55-59</b> | 0,00523 | 70102  | 125824 | 100959 |

†Values used in this table are for the urban population

<sup>1</sup> Initial value used in the stock of not-overweight population in 2005 for higher SES.

<sup>2</sup> Initial value used in the stock of overweight population in 2005 for higher SES.

<sup>3</sup> Initial value used in the stock of obese population in 2005 for higher SES.

**Table 18. Data and projections of the Fertility rates†**

| <b>Year</b> | <b>Fertility rate</b> | <b>Year</b> | <b>Fertility rate</b> | <b>Year</b> | <b>Fertility rate</b> |
|-------------|-----------------------|-------------|-----------------------|-------------|-----------------------|
| 1960        | 6.807                 | 1985        | 3.420                 | 2010        | 2.010                 |
| 1961        | 6.801                 | 1986        | 3.320                 | 2011        | 1.978                 |
| 1962        | 6.779                 | 1987        | 3.227                 | 2012        | 1.948                 |
| 1963        | 6.736                 | 1988        | 3.142                 | 2013        | 1.921                 |
| 1964        | 6.668                 | 1989        | 3.065                 | 2014        | 1.897                 |
| 1965        | 6.567                 | 1990        | 2.994                 | 2015        | 1.874                 |
| 1966        | 6.425                 | 1991        | 2.927                 | 2016        | 1.851                 |
| 1967        | 6.246                 | 1992        | 2.860                 | 2017        | 1.828                 |
| 1968        | 6.034                 | 1993        | 2.794                 | 2018        | 1.805                 |
| 1969        | 5.797                 | 1994        | 2.727                 | 2019        | 1.782                 |
| 1970        | 5.548                 | 1995        | 2.660                 | 2020        | 1.759                 |
| 1971        | 5.300                 | 1996        | 2.596                 | 2021        | 1.736                 |
| 1972        | 5.067                 | 1997        | 2.535                 | 2022        | 1.713                 |
| 1973        | 4.857                 | 1998        | 2.481                 | 2023        | 1.690                 |
| 1974        | 4.675                 | 1999        | 2.432                 | 2024        | 1.667                 |
| 1975        | 4.523                 | 2000        | 2.389                 | 2025        | 1.644                 |
| 1976        | 4.396                 | 2001        | 2.349                 | 2026        | 1.621                 |
| 1977        | 4.284                 | 2002        | 2.311                 | 2027        | 1.598                 |
| 1978        | 4.177                 | 2003        | 2.274                 | 2028        | 1.575                 |
| 1979        | 4.071                 | 2004        | 2.236                 | 2029        | 1.552                 |
| 1980        | 3.965                 | 2005        | 2.197                 | 2030        | 1.529                 |
| 1981        | 3.855                 | 2006        | 2.157                 |             |                       |
| 1982        | 3.744                 | 2007        | 2.118                 |             |                       |
| 1983        | 3.634                 | 2008        | 2.080                 |             |                       |
| 1984        | 3.526                 | 2009        | 2.044                 |             |                       |

† Data of Fertility rate of world Data Bank(1960–2015)[1] was used to forecast the fertility rate from 2015 to 2030. Holt-Winters no seasonal method in EViews 5 (Quantitative Micro Software, LLC) was used to forecast the fertility rate. In the SD model we used data from 2005 to 2030.

## References

- 1 World Data Bank. World Development Indicators. <http://databank.worldbank.org/data/reports.aspx?source=World%20Development%20Indicators> (accessed 22 Aug 2019).



1  
2  
3  
4  
5  
6  
7  
8  
9  
10  
11  
12  
13  
14  
15  
16  
17  
18  
19  
20  
21  
22  
23  
24  
25  
26  
27  
28  
29  
30  
31  
32  
33  
34  
35  
36  
37  
38  
39  
40  
41  
42  
43  
44  
45  
46  
47  
48  
49  
50  
51  
52  
53  
54  
55  
56  
57  
58  
59  
60

**Supplementary Information 3**

**Supplement to: Understanding the nutritional transition by socioeconomic status in Colombia at different spatial scales.**

For peer review only

## Table of contents

|                                                                                        |     |
|----------------------------------------------------------------------------------------|-----|
| Section 1. Parameters and data used in the model at regional and department level..... | 3   |
| 1.1 Caribe region .....                                                                | 3   |
| 1.1.1 Data and model parameters used .....                                             | 3   |
| 1.2 Oriental region.....                                                               | 30  |
| 1.2.1 Data and model parameters used .....                                             | 30  |
| 1.3 Central region.....                                                                | 50  |
| 1.3.1 Data and model parameters used .....                                             | 50  |
| 1.4 Pacifica Region.....                                                               | 75  |
| 1.4.1 Data and model parameters used .....                                             | 75  |
| 1.5 Bogotá.....                                                                        | 93  |
| 1.5.1 Data and model parameters used .....                                             | 93  |
| 1.6 Orinoquia y Amazonia region .....                                                  | 100 |
| 1.6.1 Data and model parameters used .....                                             | 100 |
| References .....                                                                       | 124 |

## Section 1. Parameters and data used in the model at regional and department level

The following tables describe the data and parameters used in the two system dynamics (SD) models: SD model of the entire urban population and SD model segregated by socioeconomic status (SES) and to estimate the transference rates (TRs) by age, body mass index (BMI) category, and socioeconomic status (SES) at regional and department level.

### 1.1 Caribe region

The Caribbean region of Colombia is located in the north-western area of the national territory and consists of eight departments and the island region of San Andres, the departments are:

- Atlántico (08)
- Bolívar (13)
- Cesar (20)
- Córdoba (23)
- La Guajira (44)
- Magdalena (47)
- Sucre (70)
- San Andrés (88)

#### 1.1.1 Data and model parameters used

**Table 1. Prevalent rates of entire population by age group, sex, and body mass index category in 2005 (Caribe region)**

| Age Group | Nutritional State Males |           |         | Nutritional State Females |           |         |
|-----------|-------------------------|-----------|---------|---------------------------|-----------|---------|
|           | Not-Overweigh           | Overweigh | Obese   | Not-Overweigh             | Overweigh | Obese   |
| 0-4       | 0,74780                 | 0,20256   | 0,04964 | 0,80065                   | 0,16436   | 0,03499 |
| 5-9       | 0,83481                 | 0,10835   | 0,05684 | 0,84971                   | 0,11753   | 0,03276 |
| 10-14     | 0,87175                 | 0,09359   | 0,03466 | 0,85540                   | 0,12544   | 0,01916 |
| 15-19     | 0,90159                 | 0,07381   | 0,02460 | 0,85434                   | 0,12254   | 0,02312 |
| 20-24     | 0,76897                 | 0,18527   | 0,04576 | 0,78406                   | 0,16718   | 0,04876 |
| 25-29     | 0,63319                 | 0,28312   | 0,08368 | 0,64600                   | 0,25427   | 0,09973 |
| 30-34     | 0,50084                 | 0,38526   | 0,11390 | 0,51341                   | 0,33764   | 0,14896 |
| 35-39     | 0,46274                 | 0,39168   | 0,14558 | 0,47688                   | 0,35046   | 0,17266 |
| 40-44     | 0,45455                 | 0,40074   | 0,14471 | 0,41704                   | 0,38164   | 0,20133 |
| 45-49     | 0,42549                 | 0,39957   | 0,17495 | 0,32316                   | 0,42621   | 0,25064 |
| 50-54     | 0,46341                 | 0,35501   | 0,18157 | 0,33382                   | 0,38653   | 0,27965 |
| 55-59     | 0,45779                 | 0,37338   | 0,16883 | 0,33589                   | 0,38772   | 0,27639 |

**Table 2. Prevalent rates of lower socioeconomic status population by age group, sex, and body mass index category in 2005 (Caribe region)**

| Age Group | Nutritional State Males |           |         | Nutritional State Females |           |         |
|-----------|-------------------------|-----------|---------|---------------------------|-----------|---------|
|           | Not-Overweigh           | Overweigh | Obese   | Not-Overweigh             | Overweigh | Obese   |
| 0-4       | 0,76609                 | 0,20251   | 0,03140 | 0,83223                   | 0,14784   | 0,01993 |
| 5-9       | 0,90942                 | 0,06884   | 0,02174 | 0,90040                   | 0,08765   | 0,01195 |
| 10-14     | 0,92193                 | 0,06320   | 0,01487 | 0,90164                   | 0,08607   | 0,01230 |
| 15-19     | 0,95738                 | 0,04262   | 0,00000 | 0,86782                   | 0,10920   | 0,02299 |
| 20-24     | 0,83469                 | 0,13008   | 0,03523 | 0,78330                   | 0,17097   | 0,04573 |
| 25-29     | 0,70874                 | 0,24919   | 0,04207 | 0,65051                   | 0,25765   | 0,09184 |
| 30-34     | 0,63178                 | 0,29070   | 0,07752 | 0,55585                   | 0,30319   | 0,14096 |
| 35-39     | 0,57391                 | 0,34783   | 0,07826 | 0,48997                   | 0,33524   | 0,17479 |
| 40-44     | 0,58209                 | 0,32836   | 0,08955 | 0,48693                   | 0,34314   | 0,16993 |
| 45-49     | 0,57143                 | 0,32298   | 0,10559 | 0,36965                   | 0,40467   | 0,22568 |
| 50-54     | 0,58974                 | 0,29487   | 0,11538 | 0,44907                   | 0,33796   | 0,21296 |
| 55-59     | 0,62376                 | 0,24752   | 0,12871 | 0,48810                   | 0,30357   | 0,20833 |

**Table 3. Prevalent rates of middle socioeconomic status population by age group, sex, and body mass index category in 2005 (Caribe region)**

| Age Group | Nutritional State Males |           |         | Nutritional State Females |           |         |
|-----------|-------------------------|-----------|---------|---------------------------|-----------|---------|
|           | Not-Overweigh           | Overweigh | Obese   | Not-Overweigh             | Overweigh | Obese   |
| 0-4       | 0,72063                 | 0,22540   | 0,05397 | 0,77982                   | 0,17737   | 0,04281 |
| 5-9       | 0,86000                 | 0,09333   | 0,04667 | 0,82550                   | 0,10738   | 0,06711 |
| 10-14     | 0,87975                 | 0,08228   | 0,03797 | 0,86127                   | 0,13295   | 0,00578 |
| 15-19     | 0,88710                 | 0,05376   | 0,05914 | 0,84375                   | 0,12946   | 0,02679 |
| 20-24     | 0,79583                 | 0,17500   | 0,02917 | 0,79063                   | 0,16529   | 0,04408 |
| 25-29     | 0,63902                 | 0,27805   | 0,08293 | 0,62145                   | 0,25237   | 0,12618 |
| 30-34     | 0,44156                 | 0,44805   | 0,11039 | 0,51389                   | 0,35069   | 0,13542 |
| 35-39     | 0,43671                 | 0,37975   | 0,18354 | 0,48814                   | 0,34576   | 0,16610 |
| 40-44     | 0,45399                 | 0,39264   | 0,15337 | 0,37209                   | 0,43023   | 0,19767 |
| 45-49     | 0,39370                 | 0,37795   | 0,22835 | 0,31050                   | 0,45662   | 0,23288 |
| 50-54     | 0,49398                 | 0,31325   | 0,19277 | 0,33500                   | 0,39500   | 0,27000 |
| 55-59     | 0,45977                 | 0,39080   | 0,14943 | 0,30534                   | 0,38931   | 0,30534 |

**Table 4. Prevalent rates of higher socioeconomic status population by age group, sex, and body mass index category in 2005 (Caribe region)**

| Age Group | Nutritional State Males |           |         | Nutritional State Females |           |         |
|-----------|-------------------------|-----------|---------|---------------------------|-----------|---------|
|           | Not-Overweigh           | Overweigh | Obese   | Not-Overweigh             | Overweigh | Obese   |
| 0-4       | 0.73737                 | 0.17845   | 0.08418 | 0.76000                   | 0.18333   | 0.05667 |
| 5-9       | 0.65693                 | 0.20438   | 0.13869 | 0.77311                   | 0.19328   | 0.03361 |
| 10-14     | 0.77333                 | 0.16000   | 0.06667 | 0.77707                   | 0.17834   | 0.04459 |
| 15-19     | 0.83000                 | 0.14000   | 0.03000 | 0.84642                   | 0.13311   | 0.02048 |
| 20-24     | 0.66202                 | 0.26481   | 0.07317 | 0.77934                   | 0.16432   | 0.05634 |
| 25-29     | 0.51232                 | 0.33990   | 0.14778 | 0.66089                   | 0.25248   | 0.08663 |
| 30-34     | 0.36757                 | 0.46486   | 0.16757 | 0.46647                   | 0.36443   | 0.16910 |
| 35-39     | 0.34921                 | 0.45503   | 0.19577 | 0.45289                   | 0.37082   | 0.17629 |
| 40-44     | 0.30857                 | 0.49143   | 0.20000 | 0.38824                   | 0.37941   | 0.23235 |
| 45-49     | 0.31429                 | 0.48571   | 0.20000 | 0.29355                   | 0.42258   | 0.28387 |
| 50-54     | 0.29231                 | 0.45385   | 0.25385 | 0.23970                   | 0.41948   | 0.34082 |
| 55-59     | 0.31667                 | 0.46667   | 0.21667 | 0.23874                   | 0.45045   | 0.31081 |

**Table 5. Prevalent rates of entire population by age group, sex, and body mass index category in 2010 (Caribe region)**

| Age Group | Nutritional State Males |           |         | Nutritional State Females |           |         |
|-----------|-------------------------|-----------|---------|---------------------------|-----------|---------|
|           | Not-Overweigh           | Overweigh | Obese   | Not-Overweigh             | Overweigh | Obese   |
| 0-4       | 0.74984                 | 0.19572   | 0.05444 | 0.78199                   | 0.17084   | 0.04718 |
| 5-9       | 0.81667                 | 0.11923   | 0.06410 | 0.81776                   | 0.12989   | 0.05235 |
| 10-14     | 0.81581                 | 0.12345   | 0.06074 | 0.80601                   | 0.14958   | 0.04442 |
| 15-19     | 0.86134                 | 0.09872   | 0.03994 | 0.81877                   | 0.14296   | 0.03827 |
| 20-24     | 0.73229                 | 0.19167   | 0.07604 | 0.71296                   | 0.20463   | 0.08241 |
| 25-29     | 0.53554                 | 0.32108   | 0.14338 | 0.55194                   | 0.30804   | 0.14002 |
| 30-34     | 0.44954                 | 0.36566   | 0.18480 | 0.44521                   | 0.34834   | 0.20646 |
| 35-39     | 0.38959                 | 0.40788   | 0.20253 | 0.39918                   | 0.37769   | 0.22313 |
| 40-44     | 0.34884                 | 0.42151   | 0.22965 | 0.34736                   | 0.40215   | 0.25049 |
| 45-49     | 0.39465                 | 0.44969   | 0.15566 | 0.25573                   | 0.44725   | 0.29702 |
| 50-54     | 0.40234                 | 0.41016   | 0.18750 | 0.29475                   | 0.39569   | 0.30956 |
| 55-59     | 0.41422                 | 0.42402   | 0.16176 | 0.25291                   | 0.40266   | 0.34443 |

**Table 6. Prevalent rates of lower socioeconomic status population by age group, sex, and body mass index category in 2010 (Caribe region)**

| Age Group | Nutritional State Males |           |         | Nutritional State Females |           |         |
|-----------|-------------------------|-----------|---------|---------------------------|-----------|---------|
|           | Not-Overweigh           | Overweigh | Obese   | Not-Overweigh             | Overweigh | Obese   |
| 0-4       | 0.74797                 | 0.20209   | 0.04994 | 0.79267                   | 0.16941   | 0.03793 |
| 5-9       | 0.84961                 | 0.10213   | 0.04826 | 0.85615                   | 0.10325   | 0.04060 |
| 10-14     | 0.85993                 | 0.09501   | 0.04507 | 0.81165                   | 0.15242   | 0.03594 |
| 15-19     | 0.89886                 | 0.07407   | 0.02707 | 0.81686                   | 0.14680   | 0.03634 |
| 20-24     | 0.76459                 | 0.16298   | 0.07243 | 0.69811                   | 0.20755   | 0.09434 |
| 25-29     | 0.61330                 | 0.27586   | 0.11084 | 0.52495                   | 0.32163   | 0.15342 |
| 30-34     | 0.50505                 | 0.34848   | 0.14646 | 0.42520                   | 0.33858   | 0.23622 |
| 35-39     | 0.45580                 | 0.36464   | 0.17956 | 0.40889                   | 0.36889   | 0.22222 |

|       |         |         |         |         |         |         |
|-------|---------|---------|---------|---------|---------|---------|
| 40-44 | 0.37330 | 0.43324 | 0.19346 | 0.35700 | 0.38742 | 0.25558 |
| 45-49 | 0.43558 | 0.42331 | 0.14110 | 0.27569 | 0.40852 | 0.31579 |
| 50-54 | 0.48289 | 0.36502 | 0.15209 | 0.31686 | 0.38663 | 0.29651 |
| 55-59 | 0.51064 | 0.38298 | 0.10638 | 0.29412 | 0.38824 | 0.31765 |

**Table 7. Prevalent rates of middle socioeconomic status population by age group, sex, and body mass index category in 2010 (Caribe region)**

| Age Group | Nutritional State Males |           |         | Nutritional State Females |           |         |
|-----------|-------------------------|-----------|---------|---------------------------|-----------|---------|
|           | Not-Overweigh           | Overweigh | Obese   | Not-Overweigh             | Overweigh | Obese   |
| 0-4       | 0.80612                 | 0.15306   | 0.04082 | 0.80352                   | 0.14663   | 0.04985 |
| 5-9       | 0.81548                 | 0.13393   | 0.05060 | 0.85559                   | 0.11172   | 0.03270 |
| 10-14     | 0.81572                 | 0.15718   | 0.02710 | 0.83333                   | 0.13218   | 0.03448 |
| 15-19     | 0.86875                 | 0.10313   | 0.02813 | 0.84146                   | 0.10976   | 0.04878 |
| 20-24     | 0.76077                 | 0.17703   | 0.06220 | 0.72374                   | 0.21790   | 0.05837 |
| 25-29     | 0.57346                 | 0.27962   | 0.14692 | 0.60465                   | 0.29070   | 0.10465 |
| 30-34     | 0.48276                 | 0.33333   | 0.18391 | 0.45126                   | 0.37906   | 0.16968 |
| 35-39     | 0.34426                 | 0.43716   | 0.21858 | 0.42041                   | 0.33469   | 0.24490 |
| 40-44     | 0.36667                 | 0.39333   | 0.24000 | 0.35135                   | 0.40154   | 0.24710 |
| 45-49     | 0.41060                 | 0.45033   | 0.13907 | 0.21287                   | 0.47030   | 0.31683 |
| 50-54     | 0.45872                 | 0.38532   | 0.15596 | 0.36420                   | 0.35185   | 0.28395 |
| 55-59     | 0.43956                 | 0.41758   | 0.14286 | 0.27941                   | 0.34559   | 0.37500 |

**Table 8. Prevalent rates of higher socioeconomic status population by age group, sex, and body mass index category in 2010 (Caribe region)**

| Age Group | Nutritional State Males |           |         | Nutritional State Females |           |         |
|-----------|-------------------------|-----------|---------|---------------------------|-----------|---------|
|           | Not-Overweigh           | Overweigh | Obese   | Not-Overweigh             | Overweigh | Obese   |
| 0-4       | 0.67931                 | 0.23448   | 0.08621 | 0.72285                   | 0.20599   | 0.07116 |
| 5-9       | 0.72973                 | 0.15015   | 0.12012 | 0.65000                   | 0.23571   | 0.11429 |
| 10-14     | 0.70968                 | 0.15543   | 0.13490 | 0.76862                   | 0.15957   | 0.07181 |
| 15-19     | 0.76721                 | 0.15082   | 0.08197 | 0.80217                   | 0.16531   | 0.03252 |
| 20-24     | 0.64567                 | 0.25984   | 0.09449 | 0.73038                   | 0.18771   | 0.08191 |
| 25-29     | 0.33668                 | 0.45729   | 0.20603 | 0.55519                   | 0.29870   | 0.14610 |
| 30-34     | 0.30570                 | 0.43005   | 0.26425 | 0.48101                   | 0.33333   | 0.18565 |
| 35-39     | 0.29518                 | 0.46988   | 0.23494 | 0.36525                   | 0.42908   | 0.20567 |
| 40-44     | 0.28070                 | 0.42105   | 0.29825 | 0.32593                   | 0.42963   | 0.24444 |
| 45-49     | 0.29560                 | 0.50314   | 0.20126 | 0.25830                   | 0.48708   | 0.25461 |
| 50-54     | 0.20714                 | 0.51429   | 0.27857 | 0.21519                   | 0.43882   | 0.34599 |
| 55-59     | 0.25581                 | 0.48837   | 0.25581 | 0.18571                   | 0.45714   | 0.35714 |

**Table 9. Fraction of births for men by body mass index category, and socioeconomic status (Caribe region) †**

| Population group | Lower SES (%/year) | Middle SES (%/year) | Higher SES (%/year) | Complete Urban Population (%/year) |
|------------------|--------------------|---------------------|---------------------|------------------------------------|
| Not-overweight   | 84,96%             | 72,73%              | 75,86%              | 79,77%                             |
| Overweight       | 9,77%              | 18,18%              | 15,52%              | 13,23%                             |
| Obese            | 5,26%              | 9,09%               | 8,62%               | 7,00%                              |

† The fractions of births by each BMI category correspond to the prevalences by BMI category of children aged

0 to 12 months

**Table 10. Fraction of births for women by body mass index category and socioeconomic status (Caribe region) †**

| Population group | Lower SES (%/year) | Middle SES (%/year) | Higher SES (%/year) | Complete Urban Population (%/year) |
|------------------|--------------------|---------------------|---------------------|------------------------------------|
| Not- overweight  | 81,43%             | 75,68%              | 69,84%              | 77,26%                             |
| Overweight       | 17,86%             | 17,57%              | 22,22%              | 18,77%                             |
| Obese            | 0,71%              | 6,76%               | 7,94%               | 3,97%                              |

† The fractions of births by each BMI category correspond to the prevalences by BMI category of children aged 0 to 12 months

**Table 11. Mortality rates for men and population size by age group without segregate by socioeconomic status (Caribe region) †**

| Age group | Mortality rates (R) (%/year) | Not- overweight men in 2005 (Number of people) <sup>1</sup> | Overweight men in 2005 (Number of people) <sup>2</sup> | Obese men in 2005 (Number of people) <sup>3</sup> |
|-----------|------------------------------|-------------------------------------------------------------|--------------------------------------------------------|---------------------------------------------------|
| 0-4       | 0,00612                      | 269775                                                      | 73076                                                  | 17908                                             |
| 5-9       | 0,00046                      | 301926                                                      | 39186                                                  | 20557                                             |
| 10-14     | 0,00045                      | 310652                                                      | 33350                                                  | 12352                                             |
| 15-19     | 0,00161                      | 297832                                                      | 24381                                                  | 8127                                              |
| 20-24     | 0,00368                      | 218694                                                      | 52690                                                  | 13014                                             |
| 25-29     | 0,00423                      | 157427                                                      | 70391                                                  | 20805                                             |
| 30-34     | 0,00416                      | 108075                                                      | 83134                                                  | 24579                                             |
| 35-39     | 0,00403                      | 98567                                                       | 83431                                                  | 31010                                             |
| 40-44     | 0,00481                      | 90149                                                       | 79478                                                  | 28700                                             |
| 45-49     | 0,00574                      | 68289                                                       | 64129                                                  | 28078                                             |
| 50-54     | 0,00843                      | 58448                                                       | 44776                                                  | 22901                                             |
| 55-59     | 0,01214                      | 44561                                                       | 36344                                                  | 16434                                             |

† Values used in this table are for the urban population

<sup>1</sup> Initial value used in the stock of not-overweight population in 2005.

<sup>2</sup> Initial value used in the stock of overweight population in 2005.

<sup>3</sup> Initial value used in the stock of obese population in 2005.

**Table 12. Mortality rates for women and population size by age group without segregate by socioeconomic status (Caribe region) †**

| Age group | Mortality rates (R) (%/year) | Not- overweight men in 2005 (Number of people) <sup>1</sup> | Overweight men in 2005 (Number of people) <sup>2</sup> | Obese men in 2005 (Number of people) <sup>3</sup> |
|-----------|------------------------------|-------------------------------------------------------------|--------------------------------------------------------|---------------------------------------------------|
| 0-4       | 0,01083                      | 278590                                                      | 57190                                                  | 12174                                             |
| 5-9       | 0,00023                      | 297854                                                      | 41200                                                  | 11482                                             |
| 10-14     | 0,00022                      | 294633                                                      | 43205                                                  | 6601                                              |
| 15-19     | 0,00033                      | 281467                                                      | 40373                                                  | 7618                                              |
| 20-24     | 0,00048                      | 240108                                                      | 51198                                                  | 14933                                             |
| 25-29     | 0,00046                      | 175494                                                      | 69075                                                  | 27093                                             |
| 30-34     | 0,00060                      | 122749                                                      | 80725                                                  | 35614                                             |
| 35-39     | 0,00089                      | 114031                                                      | 83803                                                  | 41287                                             |
| 40-44     | 0,00113                      | 90818                                                       | 83110                                                  | 43843                                             |
| 45-49     | 0,00184                      | 57737                                                       | 76149                                                  | 44780                                             |
| 50-54     | 0,00239                      | 46299                                                       | 53610                                                  | 38786                                             |
| 55-59     | 0,00349                      | 36233                                                       | 41823                                                  | 29814                                             |

† Values used in this table are for the urban population

<sup>1</sup> Initial value used in the stock of not-overweight population in 2005.

<sup>2</sup> Initial value used in the stock of overweight population in 2005.

<sup>3</sup> Initial value used in the stock of obese population in 2005.

**Table 13. Man mortality rates and population size by age group for the lower socioeconomic status population (Caribe region) †**

| Age group | Mortality rates (R) (%/year) | Not- overweight men in 2005 (Number of people) <sup>1</sup> | Overweight men in 2005 (Number of people) <sup>2</sup> | Obese men in 2005 (Number of people) <sup>3</sup> |
|-----------|------------------------------|-------------------------------------------------------------|--------------------------------------------------------|---------------------------------------------------|
| 0-4       | 0,00612                      | 140953                                                      | 37260                                                  | 5777                                              |
| 5-9       | 0,00046                      | 161241                                                      | 12206                                                  | 3854                                              |
| 10-14     | 0,00045                      | 153164                                                      | 10499                                                  | 2470                                              |
| 15-19     | 0,00161                      | 139594                                                      | 6215                                                   | 0                                                 |
| 20-24     | 0,00368                      | 97762                                                       | 15236                                                  | 4126                                              |
| 25-29     | 0,00423                      | 75939                                                       | 26700                                                  | 4508                                              |
| 30-34     | 0,00416                      | 58917                                                       | 27109                                                  | 7229                                              |
| 35-39     | 0,00403                      | 48730                                                       | 29533                                                  | 6645                                              |
| 40-44     | 0,00481                      | 43051                                                       | 24285                                                  | 6623                                              |
| 45-49     | 0,00574                      | 31891                                                       | 18025                                                  | 5893                                              |
| 50-54     | 0,00843                      | 31446                                                       | 15723                                                  | 6152                                              |
| 55-59     | 0,01214                      | 19910                                                       | 7901                                                   | 4108                                              |

†Values used in this table are for the urban population

<sup>1</sup> Initial value used in the stock of not-overweight population in 2005 for lower SES.

<sup>2</sup> Initial value used in the stock of overweight population in 2005 for lower SES.

<sup>3</sup> Initial value used in the stock of obese population in 2005 for lower SES.

**Table 14. Women mortality rates and population size by age group for the lower socioeconomic status population (Caribe region) †**

| Age group | Mortality rates (R) (%/year) | Not- overweight women in 2005 (Number of people) <sup>1</sup> | Overweight women in 2005 (Number of people) <sup>2</sup> | Obese women in 2005 (Number of people) <sup>3</sup> |
|-----------|------------------------------|---------------------------------------------------------------|----------------------------------------------------------|-----------------------------------------------------|
| 0-4       | 0,01083                      | 147687                                                        | 26236                                                    | 3537                                                |
| 5-9       | 0,00023                      | 154728                                                        | 15062                                                    | 2054                                                |
| 10-14     | 0,00022                      | 144784                                                        | 13820                                                    | 1974                                                |
| 15-19     | 0,00033                      | 126197                                                        | 15879                                                    | 3343                                                |
| 20-24     | 0,00048                      | 98789                                                         | 21563                                                    | 5767                                                |
| 25-29     | 0,00046                      | 76159                                                         | 30165                                                    | 10752                                               |
| 30-34     | 0,00060                      | 57433                                                         | 31327                                                    | 14564                                               |
| 35-39     | 0,00089                      | 46702                                                         | 31954                                                    | 16660                                               |
| 40-44     | 0,00113                      | 39543                                                         | 27866                                                    | 13800                                               |
| 45-49     | 0,00184                      | 22966                                                         | 25141                                                    | 14021                                               |
| 50-54     | 0,00239                      | 26332                                                         | 19817                                                    | 12487                                               |
| 55-59     | 0,00349                      | 17265                                                         | 10738                                                    | 7369                                                |

†Values used in this table are for the urban population

<sup>1</sup> Initial value used in the stock of not-overweight population in 2005 for lower SES.

<sup>2</sup> Initial value used in the stock of overweight population in 2005 for lower SES.

<sup>3</sup> Initial value used in the stock of obese population in 2005 for lower SES.

**Table 15. Man mortality rates and population size by age group for the middle socioeconomic status population (Caribe region) †**

| Age group | Mortality rates (R) (%/year) | Not- overweight men in 2005 (Number of people) <sup>1</sup> | Overweight men in 2005 (Number of people) <sup>2</sup> | Obese men in 2005 (Number of people) <sup>3</sup> |
|-----------|------------------------------|-------------------------------------------------------------|--------------------------------------------------------|---------------------------------------------------|
| 0-4       | 0,00612                      | 65566                                                       | 20508                                                  | 4910                                              |
| 5-9       | 0,00046                      | 82869                                                       | 8994                                                   | 4497                                              |
| 10-14     | 0,00045                      | 85846                                                       | 8029                                                   | 3706                                              |



|       |         |       |       |       |
|-------|---------|-------|-------|-------|
| 15-19 | 0,00161 | 78880 | 4781  | 5259  |
| 20-24 | 0,00368 | 60625 | 13331 | 2222  |
| 25-29 | 0,00423 | 45425 | 19765 | 5895  |
| 30-34 | 0,00416 | 24579 | 24940 | 6145  |
| 35-39 | 0,00403 | 25472 | 22150 | 10706 |
| 40-44 | 0,00481 | 27229 | 23549 | 9199  |
| 45-49 | 0,00574 | 17332 | 16639 | 10053 |
| 50-54 | 0,00843 | 14014 | 8887  | 5469  |
| 55-59 | 0,01214 | 12641 | 10745 | 4108  |

†Values used in this table are for the urban population

1 Initial value used in the stock of not-overweight population in 2005 for middle SES.

2 Initial value used in the stock of overweight population in 2005 for middle SES.

3 Initial value used in the stock of obese population in 2005 for middle SES.

**Table 16. Women mortality rates and population size by age group for the middle socioeconomic status population (Caribe region) †**

| Age group | Mortality rates (R) (%/year) | Not- overweight women in 2005 (Number of people) <sup>1</sup> | Overweight women in 2005 (Number of people) <sup>2</sup> | Obese women in 2005 (Number of people) <sup>3</sup> |
|-----------|------------------------------|---------------------------------------------------------------|----------------------------------------------------------|-----------------------------------------------------|
| 0-4       | 0,01083                      | 68433                                                         | 15565                                                    | 3757                                                |
| 5-9       | 0,00023                      | 77096                                                         | 10029                                                    | 6268                                                |
| 10-14     | 0,00022                      | 81233                                                         | 12539                                                    | 545                                                 |
| 15-19     | 0,00033                      | 74825                                                         | 11481                                                    | 2375                                                |
| 20-24     | 0,00048                      | 64854                                                         | 13558                                                    | 3616                                                |
| 25-29     | 0,00046                      | 48269                                                         | 19602                                                    | 9801                                                |
| 30-34     | 0,00060                      | 31694                                                         | 21629                                                    | 8352                                                |
| 35-39     | 0,00089                      | 31962                                                         | 22640                                                    | 10876                                               |
| 40-44     | 0,00113                      | 24505                                                         | 28334                                                    | 13018                                               |
| 45-49     | 0,00184                      | 15217                                                         | 22378                                                    | 11413                                               |
| 50-54     | 0,00239                      | 10451                                                         | 12323                                                    | 8423                                                |
| 55-59     | 0,00349                      | 9304                                                          | 11862                                                    | 9304                                                |

†Values used in this table are for the urban population

1 Initial value used in the stock of not-overweight population in 2005 for middle SES.

2 Initial value used in the stock of overweight population in 2005 for middle SES.

3 Initial value used in the stock of obese population in 2005 for middle SES.

**Table 17. Man mortality rates and population size by age group for the higher socioeconomic status population (Caribe region) †**

| Age group | Mortality rates (R) (%/year) | Not- overweight men in 2005 (Number of people) <sup>1</sup> | Overweight men in 2005 (Number of people) <sup>2</sup> | Obese men in 2005 (Number of people) <sup>3</sup> |
|-----------|------------------------------|-------------------------------------------------------------|--------------------------------------------------------|---------------------------------------------------|
| 0-4       | 0,00612                      | 63256                                                       | 15308                                                  | 7221                                              |
| 5-9       | 0,00046                      | 57816                                                       | 17987                                                  | 12206                                             |
| 10-14     | 0,00045                      | 71641                                                       | 14822                                                  | 6176                                              |
| 15-19     | 0,00161                      | 79358                                                       | 13386                                                  | 2868                                              |
| 20-24     | 0,00368                      | 60308                                                       | 24123                                                  | 6666                                              |
| 25-29     | 0,00423                      | 36062                                                       | 23926                                                  | 10403                                             |
| 30-34     | 0,00416                      | 24579                                                       | 31085                                                  | 11205                                             |
| 35-39     | 0,00403                      | 24365                                                       | 31748                                                  | 13659                                             |
| 40-44     | 0,00481                      | 19869                                                       | 31644                                                  | 12878                                             |
| 45-49     | 0,00574                      | 19065                                                       | 29465                                                  | 12133                                             |
| 50-54     | 0,00843                      | 12988                                                       | 20166                                                  | 11279                                             |
| 55-59     | 0,01214                      | 12009                                                       | 17698                                                  | 8217                                              |

†Values used in this table are for the urban population

<sup>1</sup> Initial value used in the stock of not-overweight population in 2005 for higher SES.

<sup>2</sup> Initial value used in the stock of overweight population in 2005 for higher SES.

<sup>3</sup> Initial value used in the stock of obese population in 2005 for higher SES.

**Table 18. Women mortality rates and population size by age group for the higher socioeconomic status population (Caribe region) †**

| Age group | Mortality rates (R) (%/year) | Not- overweight women in 2005 (Number of people) <sup>1</sup> | Overweight women in 2005 (Number of people) <sup>2</sup> | Obese women in 2005 (Number of people) <sup>3</sup> |
|-----------|------------------------------|---------------------------------------------------------------|----------------------------------------------------------|-----------------------------------------------------|
| 0-4       | 0,01083                      | 62883                                                         | 15169                                                    | 4689                                                |
| 5-9       | 0,00023                      | 65946                                                         | 16486                                                    | 2867                                                |
| 10-14     | 0,00022                      | 69581                                                         | 15969                                                    | 3992                                                |
| 15-19     | 0,00033                      | 80711                                                         | 12693                                                    | 1953                                                |
| 20-24     | 0,00048                      | 76447                                                         | 16118                                                    | 5526                                                |
| 25-29     | 0,00046                      | 50832                                                         | 19419                                                    | 6663                                                |
| 30-34     | 0,00060                      | 34560                                                         | 27000                                                    | 12528                                               |
| 35-39     | 0,00089                      | 35473                                                         | 29045                                                    | 13808                                               |
| 40-44     | 0,00113                      | 27450                                                         | 26826                                                    | 16428                                               |
| 45-49     | 0,00184                      | 19823                                                         | 28537                                                    | 19170                                               |
| 50-54     | 0,00239                      | 11712                                                         | 20497                                                    | 16654                                               |
| 55-59     | 0,00349                      | 10034                                                         | 18931                                                    | 13063                                               |

†Values used in this table are for the urban population

<sup>1</sup> Initial value used in the stock of not-overweight population in 2005 for higher SES.

<sup>2</sup> Initial value used in the stock of overweight population in 2005 for higher SES.

<sup>3</sup> Initial value used in the stock of obese population in 2005 for higher SES.

**Table 19. Data and projections of the Fertility rates by department and Region (Caribe region) †**

| Year | Fecundity Rate Dept 08 | Fecundity Rate Dept 13 | Fecundity Rate Dept 20 | Fecundity Rate Dept 23 | Fecundity Rate Dept 44 | Fecundity Rate Dept 47 | Fecundity Rate Dept 70 | Fecundity Rate Dept 88 | Average Fecundity Rate |
|------|------------------------|------------------------|------------------------|------------------------|------------------------|------------------------|------------------------|------------------------|------------------------|
| 2005 | 2,4597                 | 2,9078                 | 3,2147                 | 3,1016                 | 4,0106                 | 3,2734                 | 2,9719                 | 2,3611                 | 3,038                  |
| 2006 | 2,4293                 | 2,8642                 | 3,1498                 | 3,0604                 | 3,9724                 | 3,2471                 | 2,9206                 | 2,3429                 | 2,998                  |
| 2007 | 2,3989                 | 2,8206                 | 3,0849                 | 3,0192                 | 3,9342                 | 3,2208                 | 2,8693                 | 2,3247                 | 2,959                  |
| 2008 | 2,3685                 | 2,777                  | 3,02                   | 2,978                  | 3,896                  | 3,1945                 | 2,818                  | 2,3065                 | 2,920                  |
| 2009 | 2,3467                 | 2,7432                 | 2,9725                 | 2,9384                 | 3,8417                 | 3,1575                 | 2,7801                 | 2,2935                 | 2,884                  |
| 2010 | 2,3249                 | 2,7094                 | 2,925                  | 2,8988                 | 3,7874                 | 3,1205                 | 2,7422                 | 2,2805                 | 2,849                  |
| 2011 | 2,3031                 | 2,6756                 | 2,8775                 | 2,8592                 | 3,7331                 | 3,0835                 | 2,7043                 | 2,2675                 | 2,813                  |
| 2012 | 2,2813                 | 2,6418                 | 2,83                   | 2,8196                 | 3,6788                 | 3,0465                 | 2,6664                 | 2,2545                 | 2,777                  |
| 2013 | 2,2595                 | 2,608                  | 2,7825                 | 2,78                   | 3,6245                 | 3,0095                 | 2,6285                 | 2,2415                 | 2,742                  |
| 2014 | 2,2456                 | 2,5863                 | 2,7528                 | 2,7494                 | 3,565                  | 2,9679                 | 2,6031                 | 2,2322                 | 2,713                  |
| 2015 | 2,2317                 | 2,5646                 | 2,7231                 | 2,7188                 | 3,5055                 | 2,9263                 | 2,5777                 | 2,2229                 | 2,684                  |
| 2016 | 2,2178                 | 2,5429                 | 2,6934                 | 2,6882                 | 3,446                  | 2,8847                 | 2,5523                 | 2,2136                 | 2,655                  |
| 2017 | 2,2039                 | 2,5212                 | 2,6637                 | 2,6576                 | 3,3865                 | 2,8431                 | 2,5269                 | 2,2043                 | 2,626                  |
| 2018 | 2,19                   | 2,4995                 | 2,634                  | 2,627                  | 3,327                  | 2,8015                 | 2,5015                 | 2,195                  | 2,597                  |
| 2019 | 2,1761                 | 2,4778                 | 2,6043                 | 2,5964                 | 3,2675                 | 2,7599                 | 2,4761                 | 2,1857                 | 2,568                  |
| 2020 | 2,1622                 | 2,4561                 | 2,5746                 | 2,5658                 | 3,208                  | 2,7183                 | 2,4507                 | 2,1764                 | 2,539                  |
| 2021 | 2,1483                 | 2,4344                 | 2,5449                 | 2,5352                 | 3,1485                 | 2,6767                 | 2,4253                 | 2,1671                 | 2,510                  |
| 2022 | 2,1344                 | 2,4127                 | 2,5152                 | 2,5046                 | 3,089                  | 2,6351                 | 2,3999                 | 2,1578                 | 2,481                  |
| 2023 | 2,1205                 | 2,391                  | 2,4855                 | 2,474                  | 3,0295                 | 2,5935                 | 2,3745                 | 2,1485                 | 2,452                  |

| Year | Fecundity Rate Dept 08 | Fecundity Rate Dept 13 | Fecundity Rate Dept 20 | Fecundity Rate Dept 23 | Fecundity Rate Dept 44 | Fecundity Rate Dept 47 | Fecundity Rate Dept 70 | Fecundity Rate Dept 88 | Average Fecundity Rate |
|------|------------------------|------------------------|------------------------|------------------------|------------------------|------------------------|------------------------|------------------------|------------------------|
| 2024 | 2,1066                 | 2,3693                 | 2,4558                 | 2,4434                 | 2,97                   | 2,5519                 | 2,3491                 | 2,1392                 | 2,423                  |
| 2025 | 2,0927                 | 2,3476                 | 2,4261                 | 2,4128                 | 2,9105                 | 2,5103                 | 2,3237                 | 2,1299                 | 2,394                  |
| 2026 | 2,0788                 | 2,3259                 | 2,3964                 | 2,3822                 | 2,851                  | 2,4687                 | 2,2983                 | 2,1206                 | 2,365                  |
| 2027 | 2,0649                 | 2,3042                 | 2,3667                 | 2,3516                 | 2,7915                 | 2,4271                 | 2,2729                 | 2,1113                 | 2,336                  |
| 2028 | 2,051                  | 2,2825                 | 2,337                  | 2,321                  | 2,732                  | 2,3855                 | 2,2475                 | 2,102                  | 2,307                  |
| 2029 | 2,0371                 | 2,2608                 | 2,3073                 | 2,2904                 | 2,6725                 | 2,3439                 | 2,2221                 | 2,0927                 | 2,278                  |
| 2030 | 2,0232                 | 2,2391                 | 2,2776                 | 2,2598                 | 2,613                  | 2,3023                 | 2,1967                 | 2,0834                 | 2,249                  |

† Data of Fertility rate of Colombian National Department of Statistics (DANE) [1] was used to forecast the department's fertility rate from 2005 to 2030. Holt-Winters no seasonal method in EVIEWS 5 (Quantitative Micro Software, LLC) was used to forecast the fertility rate. In the SD model we used data from 2005 to 2030 and the region fertility rate was calculated as the average of all departments' fertility rates.

**Table 20. Fraction of births by departments, body mass index category, and socioeconomic status†**

| Population group |                 | Lower SES (%/year) | Middle SES (%/year) | Higher SES (%/year) | Complete Urban Population (%/year) |
|------------------|-----------------|--------------------|---------------------|---------------------|------------------------------------|
| Department 08    | Not- overweight | 82,14%             | 73,68%              | 72,50%              | 76,87%                             |
|                  | Overweight      | 16,07%             | 18,42%              | 25,00%              | 19,40%                             |
|                  | Obese           | 1,79%              | 7,89%               | 2,50%               | 3,73%                              |
| Department 13    | Not- overweight | 84,00%             | 78,57%              | 70,59%              | 78,57%                             |
|                  | Overweight      | 12,00%             | 14,29%              | 11,76%              | 12,50%                             |
|                  | Obese           | 4,00%              | 7,14%               | 17,65%              | 8,93%                              |
| Department 20    | Not- overweight | 94,59%             | 79,17%              | 73,68%              | 85,00%                             |
|                  | Overweight      | 5,41%              | 20,83%              | 15,79%              | 12,50%                             |
|                  | Obese           | 0,00%              | 0,00%               | 10,53%              | 2,50%                              |
| Department 23    | Not- overweight | 75,00%             | 75,00%              | 55,56%              | 71,11%                             |
|                  | Overweight      | 25,00%             | 25,00%              | 22,22%              | 24,44%                             |
|                  | Obese           | 0,00%              | 0,00%               | 22,22%              | 4,44%                              |
| Department 44    | Not- overweight | 91,49%             | 69,23%              | 71,43%              | 81,61%                             |
|                  | Overweight      | 8,51%              | 23,08%              | 21,43%              | 14,94%                             |
|                  | Obese           | 0,00%              | 7,69%               | 7,14%               | 3,45%                              |
| Department 47    | Not- overweight | 76,47%             | 81,25%              | 90,00%              | 80,00%                             |
|                  | Overweight      | 14,71%             | 12,50%              | 10,00%              | 13,33%                             |
|                  | Obese           | 8,82%              | 6,25%               | 0,00%               | 6,67%                              |
| Department 70    | Not- overweight | 76,00%             | 64,29%              | 84,62%              | 75,32%                             |
|                  | Overweight      | 20,00%             | 14,29%              | 7,69%               | 16,88%                             |
|                  | Obese           | 4,00%              | 21,43%              | 7,69%               | 7,79%                              |
| Department 88    | Not- overweight | 60,00%             | 57,14%              | 60,00%              | 59,09%                             |
|                  | Overweight      | 30,00%             | 28,57%              | 40,00%              | 31,82%                             |
|                  | Obese           | 10,00%             | 14,29%              | 0,00%               | 9,09%                              |

† The fractions of births by each BMI category correspond to the prevalences by BMI category of children aged 0 to 12 months

**Table 21. Prevalent rates of entire population by age group, and body mass index category (Caribe region)**

| Departments  | Age group | Not- overweight in 2005 | Overweight in 2005 | Obese in 2005 | Not- overweight in 2010 | Overweight in 2010 | Obese in 2010 |
|--------------|-----------|-------------------------|--------------------|---------------|-------------------------|--------------------|---------------|
| Department 8 | 0-4       | 0.76748                 | 0.19187            | 0.04065       | 0.71498                 | 0.21824            | 0.06678       |
|              | 5-9       | 0.85308                 | 0.09005            | 0.05687       | 0.80705                 | 0.12584            | 0.06711       |
|              | 10-14     | 0.82573                 | 0.13278            | 0.04149       | 0.78130                 | 0.15693            | 0.06177       |
|              | 15-19     | 0.87772                 | 0.10326            | 0.01902       | 0.81031                 | 0.13260            | 0.05709       |

| Departments          | Age group | Not- overweight in 2005 | Overweight in 2005 | Obese in 2005 | Not- overweight in 2010 | Overweight in 2010 | Obese in 2010 |
|----------------------|-----------|-------------------------|--------------------|---------------|-------------------------|--------------------|---------------|
|                      | 20-24     | 0.78268                 | 0.16469            | 0.05263       | 0.74014                 | 0.20186            | 0.05800       |
|                      | 25-29     | 0.61024                 | 0.27394            | 0.11581       | 0.54717                 | 0.30728            | 0.14555       |
|                      | 30-34     | 0.52577                 | 0.32216            | 0.15206       | 0.43939                 | 0.32727            | 0.23333       |
|                      | 35-39     | 0.50535                 | 0.35027            | 0.14439       | 0.34824                 | 0.40575            | 0.24601       |
|                      | 40-44     | 0.42781                 | 0.37968            | 0.19251       | 0.33918                 | 0.40351            | 0.25731       |
|                      | 45-49     | 0.39308                 | 0.39623            | 0.21069       | 0.33550                 | 0.39739            | 0.26710       |
|                      | 50-54     | 0.37638                 | 0.36162            | 0.26199       | 0.36260                 | 0.40076            | 0.23664       |
|                      | 55-59     | 0.37879                 | 0.41919            | 0.20202       | 0.29126                 | 0.38835            | 0.32039       |
| <b>Department 13</b> | 0-4       | 0.81884                 | 0.14493            | 0.03623       | 0.73684                 | 0.21303            | 0.05013       |
|                      | 5-9       | 0.85821                 | 0.10448            | 0.03731       | 0.82339                 | 0.12615            | 0.05046       |
|                      | 10-14     | 0.84756                 | 0.10976            | 0.04268       | 0.80471                 | 0.15059            | 0.04471       |
|                      | 15-19     | 0.92593                 | 0.06349            | 0.01058       | 0.86768                 | 0.09415            | 0.03817       |
|                      | 20-24     | 0.84444                 | 0.10741            | 0.04815       | 0.75080                 | 0.16294            | 0.08626       |
|                      | 25-29     | 0.70936                 | 0.24631            | 0.04433       | 0.57143                 | 0.31579            | 0.11278       |
|                      | 30-34     | 0.53365                 | 0.33654            | 0.12981       | 0.42023                 | 0.40467            | 0.17510       |
|                      | 35-39     | 0.52083                 | 0.33854            | 0.14063       | 0.42373                 | 0.36441            | 0.21186       |
|                      | 40-44     | 0.49714                 | 0.34857            | 0.15429       | 0.34538                 | 0.40964            | 0.24498       |
|                      | 45-49     | 0.40341                 | 0.41477            | 0.18182       | 0.32105                 | 0.43158            | 0.24737       |
|                      | 50-54     | 0.48148                 | 0.29630            | 0.22222       | 0.36424                 | 0.36424            | 0.27152       |
|                      | 55-59     | 0.37615                 | 0.39450            | 0.22936       | 0.39860                 | 0.32168            | 0.27972       |
| <b>Department 20</b> | 0-4       | 0.82371                 | 0.16109            | 0.01520       | 0.81989                 | 0.13978            | 0.04032       |
|                      | 5-9       | 0.84138                 | 0.11724            | 0.04138       | 0.85286                 | 0.08719            | 0.05995       |
|                      | 10-14     | 0.92308                 | 0.04895            | 0.02797       | 0.82171                 | 0.13953            | 0.03876       |
|                      | 15-19     | 0.85586                 | 0.12613            | 0.01802       | 0.86869                 | 0.10438            | 0.02694       |
|                      | 20-24     | 0.77323                 | 0.18216            | 0.04461       | 0.71041                 | 0.21719            | 0.07240       |
|                      | 25-29     | 0.68085                 | 0.22128            | 0.09787       | 0.53744                 | 0.33480            | 0.12775       |
|                      | 30-34     | 0.51980                 | 0.37624            | 0.10396       | 0.42640                 | 0.39594            | 0.17766       |
|                      | 35-39     | 0.42157                 | 0.39216            | 0.18627       | 0.36898                 | 0.43850            | 0.19251       |
|                      | 40-44     | 0.44375                 | 0.39375            | 0.16250       | 0.35593                 | 0.37853            | 0.26554       |
|                      | 45-49     | 0.32432                 | 0.45270            | 0.22297       | 0.33553                 | 0.44079            | 0.22368       |
|                      | 50-54     | 0.42453                 | 0.34906            | 0.22642       | 0.25806                 | 0.49462            | 0.24731       |
|                      | 55-59     | 0.33333                 | 0.39583            | 0.27083       | 0.25843                 | 0.49438            | 0.24719       |
| <b>Department 23</b> | 0-4       | 0.81609                 | 0.15517            | 0.02874       | 0.76226                 | 0.17736            | 0.06038       |
|                      | 5-9       | 0.84259                 | 0.09259            | 0.06481       | 0.83667                 | 0.13000            | 0.03333       |
|                      | 10-14     | 0.90179                 | 0.08036            | 0.01786       | 0.85855                 | 0.11842            | 0.02303       |
|                      | 15-19     | 0.83007                 | 0.13725            | 0.03268       | 0.85430                 | 0.12252            | 0.02318       |
|                      | 20-24     | 0.80597                 | 0.15920            | 0.03483       | 0.72727                 | 0.20000            | 0.07273       |
|                      | 25-29     | 0.70073                 | 0.22628            | 0.07299       | 0.59574                 | 0.25000            | 0.15426       |
|                      | 30-34     | 0.57516                 | 0.33333            | 0.09150       | 0.48454                 | 0.34021            | 0.17526       |
|                      | 35-39     | 0.51471                 | 0.30882            | 0.17647       | 0.46465                 | 0.36364            | 0.17172       |
|                      | 40-44     | 0.43885                 | 0.39568            | 0.16547       | 0.39560                 | 0.40110            | 0.20330       |
|                      | 45-49     | 0.47059                 | 0.42157            | 0.10784       | 0.30573                 | 0.47134            | 0.22293       |
|                      | 50-54     | 0.32381                 | 0.46667            | 0.20952       | 0.35032                 | 0.34395            | 0.30573       |
|                      | 55-59     | 0.42500                 | 0.36250            | 0.21250       | 0.25000                 | 0.44167            | 0.30833       |
| <b>Department 44</b> | 0-4       | 0.69602                 | 0.24716            | 0.05682       | 0.80919                 | 0.16254            | 0.02827       |
|                      | 5-9       | 0.87283                 | 0.09827            | 0.02890       | 0.85030                 | 0.11976            | 0.02994       |

| Departments   | Age group | Not- overweight in 2005 | Overweight in 2005 | Obese in 2005 | Not- overweight in 2010 | Overweight in 2010 | Obese in 2010 |
|---------------|-----------|-------------------------|--------------------|---------------|-------------------------|--------------------|---------------|
|               | 10-14     | 0.81955                 | 0.16541            | 0.01504       | 0.87926                 | 0.09598            | 0.02477       |
|               | 15-19     | 0.90090                 | 0.07658            | 0.02252       | 0.85490                 | 0.11765            | 0.02745       |
|               | 20-24     | 0.68276                 | 0.25517            | 0.06207       | 0.68306                 | 0.24590            | 0.07104       |
|               | 25-29     | 0.63300                 | 0.27273            | 0.09428       | 0.49143                 | 0.32571            | 0.18286       |
|               | 30-34     | 0.46860                 | 0.38164            | 0.14976       | 0.41611                 | 0.28859            | 0.29530       |
|               | 35-39     | 0.43590                 | 0.39487            | 0.16923       | 0.29167                 | 0.41667            | 0.29167       |
|               | 40-44     | 0.38191                 | 0.42714            | 0.19095       | 0.39496                 | 0.43697            | 0.16807       |
|               | 45-49     | 0.31034                 | 0.41379            | 0.27586       | 0.32710                 | 0.44860            | 0.22430       |
|               | 50-54     | 0.30973                 | 0.42478            | 0.26549       | 0.33684                 | 0.37895            | 0.28421       |
|               | 55-59     | 0.36170                 | 0.36170            | 0.27660       | 0.31818                 | 0.45455            | 0.22727       |
| Department 47 | 0-4       | 0.76817                 | 0.17301            | 0.05882       | 0.80978                 | 0.15217            | 0.03804       |
|               | 5-9       | 0.83217                 | 0.11888            | 0.04895       | 0.83784                 | 0.10541            | 0.05676       |
|               | 10-14     | 0.90643                 | 0.08772            | 0.00585       | 0.82840                 | 0.13018            | 0.04142       |
|               | 15-19     | 0.88950                 | 0.08840            | 0.02210       | 0.83596                 | 0.14511            | 0.01893       |
|               | 20-24     | 0.80349                 | 0.16594            | 0.03057       | 0.72059                 | 0.18627            | 0.09314       |
|               | 25-29     | 0.59346                 | 0.29439            | 0.11215       | 0.64135                 | 0.24895            | 0.10970       |
|               | 30-34     | 0.47953                 | 0.38012            | 0.14035       | 0.51570                 | 0.32735            | 0.15695       |
|               | 35-39     | 0.45763                 | 0.37853            | 0.16384       | 0.48295                 | 0.32386            | 0.19318       |
|               | 40-44     | 0.45283                 | 0.36478            | 0.18239       | 0.32222                 | 0.35556            | 0.32222       |
|               | 45-49     | 0.30081                 | 0.46341            | 0.23577       | 0.35754                 | 0.48603            | 0.15642       |
| Department 70 | 50-54     | 0.41463                 | 0.34959            | 0.23577       | 0.33113                 | 0.47020            | 0.19868       |
|               | 55-59     | 0.41284                 | 0.31193            | 0.27523       | 0.40164                 | 0.40164            | 0.19672       |
|               | 0-4       | 0.79772                 | 0.15954            | 0.04274       | 0.78961                 | 0.17662            | 0.03377       |
|               | 5-9       | 0.83077                 | 0.14615            | 0.02308       | 0.86250                 | 0.10750            | 0.03000       |
|               | 10-14     | 0.89726                 | 0.08904            | 0.01370       | 0.84510                 | 0.10023            | 0.05467       |
|               | 15-19     | 0.88333                 | 0.08889            | 0.02778       | 0.88636                 | 0.10101            | 0.01263       |
|               | 20-24     | 0.78889                 | 0.17778            | 0.03333       | 0.80797                 | 0.13406            | 0.05797       |
|               | 25-29     | 0.66372                 | 0.28319            | 0.05310       | 0.54878                 | 0.32927            | 0.12195       |
|               | 30-34     | 0.50691                 | 0.36866            | 0.12442       | 0.48927                 | 0.38197            | 0.12876       |
|               | 35-39     | 0.45050                 | 0.40099            | 0.14851       | 0.43902                 | 0.40650            | 0.15447       |
| Department 88 | 40-44     | 0.42690                 | 0.42105            | 0.15205       | 0.39908                 | 0.43119            | 0.16972       |
|               | 45-49     | 0.32759                 | 0.37356            | 0.29885       | 0.31148                 | 0.46995            | 0.21858       |
|               | 50-54     | 0.34043                 | 0.43972            | 0.21986       | 0.38235                 | 0.37059            | 0.24706       |
|               | 55-59     | 0.43119                 | 0.34862            | 0.22018       | 0.40909                 | 0.36364            | 0.22727       |
|               | 0-4       | 0.65217                 | 0.26087            | 0.08696       | 0.70313                 | 0.20703            | 0.08984       |
|               | 5-9       | 0.65789                 | 0.23684            | 0.10526       | 0.62030                 | 0.22180            | 0.15789       |
|               | 10-14     | 0.68293                 | 0.24390            | 0.07317       | 0.64372                 | 0.20648            | 0.14980       |
|               | 15-19     | 0.65854                 | 0.21951            | 0.12195       | 0.69856                 | 0.17225            | 0.12919       |
|               | 20-24     | 0.68571                 | 0.21429            | 0.10000       | 0.55729                 | 0.28646            | 0.15625       |
|               | 25-29     | 0.49275                 | 0.31884            | 0.18841       | 0.40376                 | 0.39906            | 0.19718       |
|               | 30-34     | 0.32759                 | 0.41379            | 0.25862       | 0.37624                 | 0.36634            | 0.25743       |
|               | 35-39     | 0.41429                 | 0.34286            | 0.24286       | 0.32979                 | 0.39894            | 0.27128       |
|               | 40-44     | 0.33333                 | 0.37879            | 0.28788       | 0.27160                 | 0.45679            | 0.27160       |
|               | 45-49     | 0.31746                 | 0.46032            | 0.22222       | 0.23605                 | 0.47210            | 0.29185       |
|               | 50-54     | 0.32759                 | 0.31034            | 0.36207       | 0.27841                 | 0.42045            | 0.30114       |

| Departments | Age group | Not- overweight in 2005 | Overweight in 2005 | Obese in 2005 | Not- overweight in 2010 | Overweight in 2010 | Obese in 2010 |
|-------------|-----------|-------------------------|--------------------|---------------|-------------------------|--------------------|---------------|
|             | 55-59     | 0.23529                 | 0.52941            | 0.23529       | 0.20611                 | 0.49618            | 0.29771       |

**Table 22. Prevalent rates of lower socioeconomic status population by age group, and body mass index category (Caribe region)**

| Departments   | Age group | Not- overweight in 2005 | Overweight in 2005 | Obese in 2005 | Not- overweight in 2010 | Overweight in 2010 | Obese in 2010 |
|---------------|-----------|-------------------------|--------------------|---------------|-------------------------|--------------------|---------------|
| Department 8  | 0-4       | 0.76748                 | 0.19187            | 0.04065       | 0.74806                 | 0.20930            | 0.04264       |
|               | 5-9       | 0.85308                 | 0.09005            | 0.05687       | 0.87868                 | 0.08824            | 0.03309       |
|               | 10-14     | 0.82573                 | 0.13278            | 0.04149       | 0.84135                 | 0.12500            | 0.03365       |
|               | 15-19     | 0.87772                 | 0.10326            | 0.01902       | 0.89418                 | 0.07937            | 0.02646       |
|               | 20-24     | 0.78268                 | 0.16469            | 0.05263       | 0.77852                 | 0.16779            | 0.05369       |
|               | 25-29     | 0.61024                 | 0.27394            | 0.11581       | 0.58824                 | 0.29412            | 0.11765       |
|               | 30-34     | 0.52577                 | 0.32216            | 0.15206       | 0.48673                 | 0.28319            | 0.23009       |
|               | 35-39     | 0.50535                 | 0.35027            | 0.14439       | 0.41414                 | 0.39394            | 0.19192       |
|               | 40-44     | 0.42781                 | 0.37968            | 0.19251       | 0.41525                 | 0.33051            | 0.25424       |
|               | 45-49     | 0.39308                 | 0.39623            | 0.21069       | 0.44000                 | 0.34000            | 0.22000       |
|               | 50-54     | 0.37638                 | 0.36162            | 0.26199       | 0.48684                 | 0.31579            | 0.19737       |
|               | 55-59     | 0.37879                 | 0.41919            | 0.20202       | 0.38776                 | 0.30612            | 0.30612       |
| Department 13 | 0-4       | 0.86726                 | 0.11504            | 0.01770       | 0.74359                 | 0.20000            | 0.05641       |
|               | 5-9       | 0.85714                 | 0.11111            | 0.03175       | 0.87719                 | 0.08333            | 0.03947       |
|               | 10-14     | 0.88571                 | 0.08571            | 0.02857       | 0.83486                 | 0.14679            | 0.01835       |
|               | 15-19     | 0.96721                 | 0.01639            | 0.01639       | 0.88108                 | 0.09189            | 0.02703       |
|               | 20-24     | 0.79787                 | 0.12766            | 0.07447       | 0.77863                 | 0.15267            | 0.06870       |
|               | 25-29     | 0.74286                 | 0.20000            | 0.05714       | 0.62712                 | 0.27119            | 0.10169       |
|               | 30-34     | 0.59155                 | 0.28169            | 0.12676       | 0.34211                 | 0.50877            | 0.14912       |
|               | 35-39     | 0.57143                 | 0.34921            | 0.07937       | 0.50000                 | 0.29167            | 0.20833       |
|               | 40-44     | 0.57143                 | 0.28571            | 0.14286       | 0.36082                 | 0.35052            | 0.28866       |
|               | 45-49     | 0.50000                 | 0.38462            | 0.11538       | 0.38356                 | 0.36986            | 0.24658       |
|               | 50-54     | 0.71795                 | 0.25641            | 0.02564       | 0.34211                 | 0.34211            | 0.31579       |
|               | 55-59     | 0.58333                 | 0.33333            | 0.08333       | 0.48936                 | 0.21277            | 0.29787       |
| Department 20 | 0-4       | 0.87356                 | 0.12069            | 0.00575       | 0.83553                 | 0.14474            | 0.01974       |
|               | 5-9       | 0.89063                 | 0.09375            | 0.01563       | 0.92994                 | 0.05732            | 0.01274       |
|               | 10-14     | 0.95238                 | 0.03175            | 0.01587       | 0.83212                 | 0.14599            | 0.02190       |
|               | 15-19     | 0.86250                 | 0.11250            | 0.02500       | 0.89899                 | 0.08081            | 0.02020       |
|               | 20-24     | 0.78689                 | 0.16393            | 0.04918       | 0.80000                 | 0.15385            | 0.04615       |
|               | 25-29     | 0.69565                 | 0.20652            | 0.09783       | 0.50000                 | 0.34375            | 0.15625       |
|               | 30-34     | 0.63953                 | 0.25581            | 0.10465       | 0.51852                 | 0.29630            | 0.18519       |
|               | 35-39     | 0.48810                 | 0.36905            | 0.14286       | 0.49123                 | 0.33333            | 0.17544       |
|               | 40-44     | 0.56522                 | 0.34783            | 0.08696       | 0.39583                 | 0.43750            | 0.16667       |
|               | 45-49     | 0.36735                 | 0.53061            | 0.10204       | 0.36957                 | 0.41304            | 0.21739       |
|               | 50-54     | 0.55882                 | 0.35294            | 0.08824       | 0.47059                 | 0.47059            | 0.05882       |
|               | 55-59     | 0.58333                 | 0.20833            | 0.20833       | 0.33333                 | 0.51852            | 0.14815       |
| Department 23 | 0-4       | 0.83333                 | 0.14815            | 0.01852       | 0.75490                 | 0.19118            | 0.05392       |
|               | 5-9       | 0.85714                 | 0.10000            | 0.04286       | 0.85652                 | 0.11304            | 0.03043       |
|               | 10-14     | 0.95161                 | 0.03226            | 0.01613       | 0.87500                 | 0.10776            | 0.01724       |

| Departments   | Age group | Not- overweight in 2005 | Overweight in 2005 | Obese in 2005 | Not- overweight in 2010 | Overweight in 2010 | Obese in 2010 |
|---------------|-----------|-------------------------|--------------------|---------------|-------------------------|--------------------|---------------|
|               | 15-19     | 0.88158                 | 0.11842            | 0.00000       | 0.87019                 | 0.10096            | 0.02885       |
|               | 20-24     | 0.83333                 | 0.13725            | 0.02941       | 0.75862                 | 0.17241            | 0.06897       |
|               | 25-29     | 0.71429                 | 0.25714            | 0.02857       | 0.60000                 | 0.26667            | 0.13333       |
|               | 30-34     | 0.56790                 | 0.33333            | 0.09877       | 0.50000                 | 0.32394            | 0.17606       |
|               | 35-39     | 0.58904                 | 0.24658            | 0.16438       | 0.46575                 | 0.36986            | 0.16438       |
|               | 40-44     | 0.46032                 | 0.28571            | 0.25397       | 0.38281                 | 0.39844            | 0.21875       |
|               | 45-49     | 0.54000                 | 0.36000            | 0.10000       | 0.37374                 | 0.40404            | 0.22222       |
|               | 50-54     | 0.44828                 | 0.36207            | 0.18966       | 0.39048                 | 0.36190            | 0.24762       |
|               | 55-59     | 0.61765                 | 0.29412            | 0.08824       | 0.35526                 | 0.44737            | 0.19737       |
| Department 44 | 0-4       | 0.72872                 | 0.22340            | 0.04787       | 0.80392                 | 0.18301            | 0.01307       |
|               | 5-9       | 0.93204                 | 0.06796            | 0.00000       | 0.90643                 | 0.08187            | 0.01170       |
|               | 10-14     | 0.82540                 | 0.17460            | 0.00000       | 0.91824                 | 0.08176            | 0.00000       |
|               | 15-19     | 0.88776                 | 0.09184            | 0.02041       | 0.89063                 | 0.09375            | 0.01563       |
|               | 20-24     | 0.74167                 | 0.20833            | 0.05000       | 0.69663                 | 0.23596            | 0.06742       |
|               | 25-29     | 0.66906                 | 0.25180            | 0.07914       | 0.52857                 | 0.28571            | 0.18571       |
|               | 30-34     | 0.54023                 | 0.27586            | 0.18391       | 0.39706                 | 0.32353            | 0.27941       |
|               | 35-39     | 0.40789                 | 0.43421            | 0.15789       | 0.29231                 | 0.38462            | 0.32308       |
|               | 40-44     | 0.50000                 | 0.41429            | 0.08571       | 0.41176                 | 0.49020            | 0.09804       |
|               | 45-49     | 0.45652                 | 0.26087            | 0.28261       | 0.43590                 | 0.30769            | 0.25641       |
|               | 50-54     | 0.43590                 | 0.35897            | 0.20513       | 0.39024                 | 0.41463            | 0.19512       |
|               | 55-59     | 0.54545                 | 0.24242            | 0.21212       | 0.42857                 | 0.42857            | 0.14286       |
| Department 47 | 0-4       | 0.78344                 | 0.17197            | 0.04459       | 0.81304                 | 0.15217            | 0.03478       |
|               | 5-9       | 0.91892                 | 0.08108            | 0.00000       | 0.89593                 | 0.07692            | 0.02715       |
|               | 10-14     | 0.90588                 | 0.08235            | 0.01176       | 0.87500                 | 0.10500            | 0.02000       |
|               | 15-19     | 0.93617                 | 0.05319            | 0.01064       | 0.84884                 | 0.13372            | 0.01744       |
|               | 20-24     | 0.89423                 | 0.10577            | 0.00000       | 0.69298                 | 0.20175            | 0.10526       |
|               | 25-29     | 0.62791                 | 0.32558            | 0.04651       | 0.70161                 | 0.19355            | 0.10484       |
|               | 30-34     | 0.53165                 | 0.34177            | 0.12658       | 0.58955                 | 0.28358            | 0.12687       |
|               | 35-39     | 0.46479                 | 0.35211            | 0.18310       | 0.50000                 | 0.32955            | 0.17045       |
|               | 40-44     | 0.50000                 | 0.36538            | 0.13462       | 0.38372                 | 0.34884            | 0.26744       |
|               | 45-49     | 0.45098                 | 0.41176            | 0.13725       | 0.38554                 | 0.43373            | 0.18072       |
|               | 50-54     | 0.46667                 | 0.35000            | 0.18333       | 0.48387                 | 0.40323            | 0.11290       |
|               | 55-59     | 0.51163                 | 0.27907            | 0.20930       | 0.52941                 | 0.35294            | 0.11765       |
| Department 70 | 0-4       | 0.79024                 | 0.19024            | 0.01951       | 0.76860                 | 0.19835            | 0.03306       |
|               | 5-9       | 0.92308                 | 0.06154            | 0.01538       | 0.89362                 | 0.07660            | 0.02979       |
|               | 10-14     | 0.96053                 | 0.03947            | 0.00000       | 0.87600                 | 0.08000            | 0.04400       |
|               | 15-19     | 0.89691                 | 0.08247            | 0.02062       | 0.89545                 | 0.10455            | 0.00000       |
|               | 20-24     | 0.78632                 | 0.15385            | 0.05983       | 0.82051                 | 0.11538            | 0.06410       |
|               | 25-29     | 0.73737                 | 0.24242            | 0.02020       | 0.61029                 | 0.30882            | 0.08088       |
|               | 30-34     | 0.52727                 | 0.39091            | 0.08182       | 0.48276                 | 0.36207            | 0.15517       |
|               | 35-39     | 0.50000                 | 0.39024            | 0.10976       | 0.46465                 | 0.39394            | 0.14141       |
|               | 40-44     | 0.50000                 | 0.40278            | 0.09722       | 0.43860                 | 0.43860            | 0.12281       |
|               | 45-49     | 0.36709                 | 0.43038            | 0.20253       | 0.37500                 | 0.43182            | 0.19318       |
|               | 50-54     | 0.41176                 | 0.37255            | 0.21569       | 0.40789                 | 0.38158            | 0.21053       |
|               | 55-59     | 0.50000                 | 0.28261            | 0.21739       | 0.53448                 | 0.25862            | 0.20690       |

| Departments   | Age group | Not- overweight in 2005 | Overweight in 2005 | Obese in 2005 | Not- overweight in 2010 | Overweight in 2010 | Obese in 2010 |
|---------------|-----------|-------------------------|--------------------|---------------|-------------------------|--------------------|---------------|
| Department 88 | 0-4       | 0.69697                 | 0.27273            | 0.03030       | 0.71560                 | 0.19725            | 0.08716       |
|               | 5-9       | 0.88235                 | 0.05882            | 0.05882       | 0.62762                 | 0.22176            | 0.15063       |
|               | 10-14     | 0.76471                 | 0.17647            | 0.05882       | 0.65625                 | 0.19643            | 0.14732       |
|               | 15-19     | 0.73333                 | 0.26667            | 0.00000       | 0.70899                 | 0.17989            | 0.11111       |
|               | 20-24     | 0.69231                 | 0.23077            | 0.07692       | 0.56742                 | 0.27528            | 0.15730       |
|               | 25-29     | 0.78947                 | 0.15789            | 0.05263       | 0.37989                 | 0.41341            | 0.20670       |
|               | 30-34     | 0.61538                 | 0.23077            | 0.15385       | 0.37423                 | 0.34356            | 0.28221       |
|               | 35-39     | 0.61111                 | 0.22222            | 0.16667       | 0.33951                 | 0.40123            | 0.25926       |
|               | 40-44     | 0.29412                 | 0.35294            | 0.35294       | 0.26147                 | 0.45872            | 0.27982       |
|               | 45-49     | 0.44444                 | 0.27778            | 0.27778       | 0.22335                 | 0.48223            | 0.29442       |
|               | 50-54     | 0.50000                 | 0.10000            | 0.40000       | 0.30519                 | 0.40260            | 0.29221       |
| 55-59         | 0.33333   | 0.50000                 | 0.16667            | 0.21495       | 0.49533                 | 0.28972            |               |

**Table 23. Prevalent rates of middle socioeconomic status population by age group, and body mass index category (Caribe region)**

| Departments   | Age group | Not- overweight in 2005 | Overweight in 2005 | Obese in 2005 | Not- overweight in 2010 | Overweight in 2010 | Obese in 2010 |
|---------------|-----------|-------------------------|--------------------|---------------|-------------------------|--------------------|---------------|
| Department 8  | 0-4       | 0.78824                 | 0.17059            | 0.04118       | 0.75723                 | 0.17919            | 0.06358       |
|               | 5-9       | 0.89655                 | 0.08621            | 0.01724       | 0.80986                 | 0.13380            | 0.05634       |
|               | 10-14     | 0.89041                 | 0.08219            | 0.02740       | 0.76774                 | 0.19355            | 0.03871       |
|               | 15-19     | 0.86813                 | 0.12088            | 0.01099       | 0.76978                 | 0.14388            | 0.08633       |
|               | 20-24     | 0.81065                 | 0.12426            | 0.06509       | 0.73034                 | 0.22472            | 0.04494       |
|               | 25-29     | 0.63830                 | 0.24823            | 0.11348       | 0.57143                 | 0.27473            | 0.15385       |
|               | 30-34     | 0.53846                 | 0.36538            | 0.09615       | 0.46392                 | 0.31959            | 0.21649       |
|               | 35-39     | 0.56075                 | 0.30841            | 0.13084       | 0.29487                 | 0.39744            | 0.30769       |
|               | 40-44     | 0.35238                 | 0.45714            | 0.19048       | 0.27632                 | 0.51316            | 0.21053       |
|               | 45-49     | 0.37374                 | 0.45455            | 0.17172       | 0.28767                 | 0.39726            | 0.31507       |
|               | 50-54     | 0.37143                 | 0.37143            | 0.25714       | 0.45455                 | 0.39394            | 0.15152       |
| 55-59         | 0.54000   | 0.32000                 | 0.14000            | 0.41176       | 0.35294                 | 0.23529            |               |
| Department 13 | 0-4       | 0.80000                 | 0.18667            | 0.01333       | 0.77320                 | 0.19588            | 0.03093       |
|               | 5-9       | 0.90000                 | 0.06667            | 0.03333       | 0.80851                 | 0.17021            | 0.02128       |
|               | 10-14     | 0.87500                 | 0.09375            | 0.03125       | 0.75904                 | 0.21687            | 0.02410       |
|               | 15-19     | 1.00000                 | 0.00000            | 0.00000       | 0.88235                 | 0.09412            | 0.02353       |
|               | 20-24     | 0.84211                 | 0.12281            | 0.03509       | 0.74603                 | 0.15873            | 0.09524       |
|               | 25-29     | 0.72340                 | 0.25532            | 0.02128       | 0.58182                 | 0.30909            | 0.10909       |
|               | 30-34     | 0.42857                 | 0.44898            | 0.12245       | 0.51724                 | 0.29310            | 0.18966       |
|               | 35-39     | 0.49020                 | 0.29412            | 0.21569       | 0.34426                 | 0.44262            | 0.21311       |
|               | 40-44     | 0.55556                 | 0.25000            | 0.19444       | 0.37288                 | 0.42373            | 0.20339       |
|               | 45-49     | 0.48148                 | 0.44444            | 0.07407       | 0.32353                 | 0.44118            | 0.23529       |
|               | 50-54     | 0.40741                 | 0.29630            | 0.29630       | 0.62069                 | 0.20690            | 0.17241       |
| 55-59         | 0.25000   | 0.50000                 | 0.25000            | 0.40000       | 0.36667                 | 0.23333            |               |
| Department 20 | 0-4       | 0.76667                 | 0.22222            | 0.01111       | 0.81169                 | 0.14286            | 0.04545       |
|               | 5-9       | 0.81818                 | 0.12727            | 0.05455       | 0.86364                 | 0.07576            | 0.06061       |
|               | 10-14     | 0.90566                 | 0.07547            | 0.01887       | 0.85616                 | 0.10274            | 0.04110       |
|               | 15-19     | 0.84211                 | 0.14474            | 0.01316       | 0.86923                 | 0.10769            | 0.02308       |
|               | 20-24     | 0.77333                 | 0.18667            | 0.04000       | 0.70330                 | 0.23077            | 0.06593       |



| Departments              | Age group | Not- overweight<br>in 2005 | Overweight<br>in 2005 | Obese in<br>2005 | Not- overweight<br>in 2010 | Overweight<br>in 2010 | Obese in<br>2010 |
|--------------------------|-----------|----------------------------|-----------------------|------------------|----------------------------|-----------------------|------------------|
|                          | 25-29     | 0.66234                    | 0.24675               | 0.09091          | 0.61053                    | 0.28421               | 0.10526          |
|                          | 30-34     | 0.42373                    | 0.45763               | 0.11864          | 0.44048                    | 0.42857               | 0.13095          |
|                          | 35-39     | 0.44776                    | 0.37313               | 0.17910          | 0.36000                    | 0.41333               | 0.22667          |
|                          | 40-44     | 0.43636                    | 0.38182               | 0.18182          | 0.33333                    | 0.35556               | 0.31111          |
|                          | 45-49     | 0.32692                    | 0.42308               | 0.25000          | 0.33929                    | 0.42857               | 0.23214          |
|                          | 50-54     | 0.43590                    | 0.38462               | 0.17949          | 0.24242                    | 0.54545               | 0.21212          |
|                          | 55-59     | 0.32500                    | 0.40000               | 0.27500          | 0.22727                    | 0.45455               | 0.31818          |
| <b>Department<br/>23</b> | 0-4       | 0.81579                    | 0.15789               | 0.02632          | 0.75000                    | 0.18750               | 0.06250          |
|                          | 5-9       | 0.80000                    | 0.08000               | 0.12000          | 0.85714                    | 0.11429               | 0.02857          |
|                          | 10-14     | 0.83871                    | 0.12903               | 0.03226          | 0.85000                    | 0.10000               | 0.05000          |
|                          | 15-19     | 0.77143                    | 0.11429               | 0.11429          | 0.89362                    | 0.08511               | 0.02128          |
|                          | 20-24     | 0.80952                    | 0.19048               | 0.00000          | 0.71429                    | 0.20000               | 0.08571          |
|                          | 25-29     | 0.67568                    | 0.16216               | 0.16216          | 0.75000                    | 0.08333               | 0.16667          |
|                          | 30-34     | 0.64865                    | 0.27027               | 0.08108          | 0.41667                    | 0.37500               | 0.20833          |
|                          | 35-39     | 0.51613                    | 0.38710               | 0.09677          | 0.52000                    | 0.36000               | 0.12000          |
|                          | 40-44     | 0.35714                    | 0.50000               | 0.14286          | 0.43333                    | 0.40000               | 0.16667          |
|                          | 45-49     | 0.42105                    | 0.47368               | 0.10526          | 0.21739                    | 0.52174               | 0.26087          |
|                          | 50-54     | 0.33333                    | 0.46667               | 0.20000          | 0.45833                    | 0.25000               | 0.29167          |
|                          | 55-59     | 0.25000                    | 0.50000               | 0.25000          | 0.05556                    | 0.38889               | 0.55556          |
| <b>Department<br/>44</b> | 0-4       | 0.67677                    | 0.27273               | 0.05051          | 0.87952                    | 0.07229               | 0.04819          |
|                          | 5-9       | 0.88372                    | 0.06977               | 0.04651          | 0.85047                    | 0.13084               | 0.01869          |
|                          | 10-14     | 0.88235                    | 0.11765               | 0.00000          | 0.87619                    | 0.10476               | 0.01905          |
|                          | 15-19     | 0.91781                    | 0.04110               | 0.04110          | 0.83784                    | 0.12162               | 0.04054          |
|                          | 20-24     | 0.70588                    | 0.25490               | 0.03922          | 0.70968                    | 0.20968               | 0.08065          |
|                          | 25-29     | 0.61628                    | 0.25581               | 0.12791          | 0.51667                    | 0.35000               | 0.13333          |
|                          | 30-34     | 0.50000                    | 0.39394               | 0.10606          | 0.46000                    | 0.26000               | 0.28000          |
|                          | 35-39     | 0.40580                    | 0.40580               | 0.18841          | 0.33962                    | 0.37736               | 0.28302          |
|                          | 40-44     | 0.37705                    | 0.42623               | 0.19672          | 0.34884                    | 0.44186               | 0.20930          |
|                          | 45-49     | 0.25490                    | 0.41176               | 0.33333          | 0.27907                    | 0.48837               | 0.23256          |
|                          | 50-54     | 0.28205                    | 0.48718               | 0.23077          | 0.42308                    | 0.19231               | 0.38462          |
|                          | 55-59     | 0.34375                    | 0.40625               | 0.25000          | 0.35294                    | 0.35294               | 0.29412          |
| <b>Department<br/>47</b> | 0-4       | 0.74359                    | 0.16667               | 0.08974          | 0.87640                    | 0.11236               | 0.01124          |
|                          | 5-9       | 0.81395                    | 0.09302               | 0.09302          | 0.86517                    | 0.12360               | 0.01124          |
|                          | 10-14     | 0.91667                    | 0.08333               | 0.00000          | 0.86486                    | 0.12162               | 0.01351          |
|                          | 15-19     | 0.81818                    | 0.13636               | 0.04545          | 0.87952                    | 0.12048               | 0.00000          |
|                          | 20-24     | 0.76667                    | 0.21667               | 0.01667          | 0.81132                    | 0.15094               | 0.03774          |
|                          | 25-29     | 0.58000                    | 0.24000               | 0.18000          | 0.63636                    | 0.30303               | 0.06061          |
|                          | 30-34     | 0.45098                    | 0.45098               | 0.09804          | 0.47170                    | 0.33962               | 0.18868          |
|                          | 35-39     | 0.40816                    | 0.38776               | 0.20408          | 0.53333                    | 0.26667               | 0.20000          |
|                          | 40-44     | 0.43860                    | 0.38596               | 0.17544          | 0.34694                    | 0.30612               | 0.34694          |
|                          | 45-49     | 0.26667                    | 0.50000               | 0.23333          | 0.30189                    | 0.58491               | 0.11321          |
|                          | 50-54     | 0.38889                    | 0.27778               | 0.33333          | 0.28261                    | 0.45652               | 0.26087          |
|                          | 55-59     | 0.33333                    | 0.33333               | 0.33333          | 0.37500                    | 0.42500               | 0.20000          |
| <b>Department<br/>70</b> | 0-4       | 0.78689                    | 0.14754               | 0.06557          | 0.83544                    | 0.12658               | 0.03797          |
|                          | 5-9       | 0.82857                    | 0.14286               | 0.02857          | 0.87805                    | 0.09756               | 0.02439          |

| Departments   | Age group | Not- overweight in 2005 | Overweight in 2005 | Obese in 2005 | Not- overweight in 2010 | Overweight in 2010 | Obese in 2010 |
|---------------|-----------|-------------------------|--------------------|---------------|-------------------------|--------------------|---------------|
|               | 10-14     | 0.85714                 | 0.14286            | 0.00000       | 0.87629                 | 0.12371            | 0.00000       |
|               | 15-19     | 0.87179                 | 0.07692            | 0.05128       | 0.93421                 | 0.05263            | 0.01316       |
|               | 20-24     | 0.88000                 | 0.12000            | 0.00000       | 0.81538                 | 0.15385            | 0.03077       |
|               | 25-29     | 0.65517                 | 0.29310            | 0.05172       | 0.57407                 | 0.25926            | 0.16667       |
|               | 30-34     | 0.48148                 | 0.27778            | 0.24074       | 0.47458                 | 0.45763            | 0.06780       |
|               | 35-39     | 0.47059                 | 0.41176            | 0.11765       | 0.47222                 | 0.34722            | 0.18056       |
|               | 40-44     | 0.40000                 | 0.45000            | 0.15000       | 0.48889                 | 0.31111            | 0.20000       |
|               | 45-49     | 0.38776                 | 0.28571            | 0.32653       | 0.28261                 | 0.47826            | 0.23913       |
|               | 50-54     | 0.45652                 | 0.36957            | 0.17391       | 0.50000                 | 0.29412            | 0.20588       |
|               | 55-59     | 0.55556                 | 0.16667            | 0.27778       | 0.45161                 | 0.29032            | 0.25806       |
| Department 88 | 0-4       | 0.48387                 | 0.35484            | 0.16129       | 0.69231                 | 0.23077            | 0.07692       |
|               | 5-9       | 0.60000                 | 0.20000            | 0.20000       | 0.59091                 | 0.18182            | 0.22727       |
|               | 10-14     | 0.46154                 | 0.38462            | 0.15385       | 0.52941                 | 0.29412            | 0.17647       |
|               | 15-19     | 0.58333                 | 0.08333            | 0.33333       | 0.78571                 | 0.00000            | 0.21429       |
|               | 20-24     | 0.73913                 | 0.17391            | 0.08696       | 0.50000                 | 0.50000            | 0.00000       |
|               | 25-29     | 0.30769                 | 0.53846            | 0.15385       | 0.54167                 | 0.33333            | 0.12500       |
|               | 30-34     | 0.36364                 | 0.40909            | 0.22727       | 0.42308                 | 0.46154            | 0.11538       |
|               | 35-39     | 0.35714                 | 0.32143            | 0.32143       | 0.31579                 | 0.36842            | 0.31579       |
|               | 40-44     | 0.40000                 | 0.40000            | 0.20000       | 0.35294                 | 0.41176            | 0.23529       |
|               | 45-49     | 0.15789                 | 0.52632            | 0.31579       | 0.32000                 | 0.36000            | 0.32000       |
|               | 50-54     | 0.34483                 | 0.27586            | 0.37931       | 0.07692                 | 0.53846            | 0.38462       |
|               | 55-59     | 0.00000                 | 0.72727            | 0.27273       | 0.22222                 | 0.38889            | 0.38889       |

**Table 24. Prevalent rates of higher socioeconomic status population by age group, and body mass index category (Caribe region)**

| Departments   | Age group | Not- overweight in 2005 | Overweight in 2005 | Obese in 2005 | Not- overweight in 2010 | Overweight in 2010 | Obese in 2010 |
|---------------|-----------|-------------------------|--------------------|---------------|-------------------------|--------------------|---------------|
| Department 8  | 0-4       | 0.72826                 | 0.20652            | 0.06522       | 0.62842                 | 0.26776            | 0.10383       |
|               | 5-9       | 0.74390                 | 0.13415            | 0.12195       | 0.69780                 | 0.17582            | 0.12637       |
|               | 10-14     | 0.68132                 | 0.24176            | 0.07692       | 0.73729                 | 0.16102            | 0.10169       |
|               | 15-19     | 0.81379                 | 0.14483            | 0.04138       | 0.76279                 | 0.17209            | 0.06512       |
|               | 20-24     | 0.72961                 | 0.20601            | 0.06438       | 0.71503                 | 0.21762            | 0.06736       |
|               | 25-29     | 0.60989                 | 0.28022            | 0.10989       | 0.49306                 | 0.34028            | 0.16667       |
|               | 30-34     | 0.41808                 | 0.36158            | 0.22034       | 0.37500                 | 0.37500            | 0.25000       |
|               | 35-39     | 0.40000                 | 0.42581            | 0.17419       | 0.33088                 | 0.41912            | 0.25000       |
|               | 40-44     | 0.35526                 | 0.39474            | 0.25000       | 0.31081                 | 0.40541            | 0.28378       |
|               | 45-49     | 0.36301                 | 0.41781            | 0.21918       | 0.28358                 | 0.44030            | 0.27612       |
|               | 50-54     | 0.25833                 | 0.42500            | 0.31667       | 0.23333                 | 0.45833            | 0.30833       |
|               | 55-59     | 0.23762                 | 0.53465            | 0.22772       | 0.18868                 | 0.44340            | 0.36792       |
| Department 13 | 0-4       | 0.77273                 | 0.14773            | 0.07955       | 0.69159                 | 0.25234            | 0.05607       |
|               | 5-9       | 0.82927                 | 0.12195            | 0.04878       | 0.72807                 | 0.17544            | 0.09649       |
|               | 10-14     | 0.79032                 | 0.14516            | 0.06452       | 0.78226                 | 0.11290            | 0.10484       |
|               | 15-19     | 0.86364                 | 0.12500            | 0.01136       | 0.83740                 | 0.09756            | 0.06504       |
|               | 20-24     | 0.88235                 | 0.08403            | 0.03361       | 0.72269                 | 0.17647            | 0.10084       |

| Departments   | Age group     | Not- overweight in 2005 | Overweight in 2005 | Obese in 2005 | Not- overweight in 2010 | Overweight in 2010 | Obese in 2010 |         |
|---------------|---------------|-------------------------|--------------------|---------------|-------------------------|--------------------|---------------|---------|
|               | 25-29         | 0.67442                 | 0.27907            | 0.04651       | 0.49462                 | 0.37634            | 0.12903       |         |
|               | 30-34         | 0.54545                 | 0.31818            | 0.13636       | 0.45882                 | 0.34118            | 0.20000       |         |
|               | 35-39         | 0.50000                 | 0.35897            | 0.14103       | 0.39241                 | 0.39241            | 0.21519       |         |
|               | 40-44         | 0.39130                 | 0.46377            | 0.14493       | 0.31183                 | 0.46237            | 0.22581       |         |
|               | 45-49         | 0.32990                 | 0.42268            | 0.24742       | 0.26506                 | 0.48193            | 0.25301       |         |
|               | 50-54         | 0.37681                 | 0.31884            | 0.30435       | 0.23913                 | 0.50000            | 0.26087       |         |
|               | 55-59         | 0.28302                 | 0.39623            | 0.32075       | 0.33333                 | 0.37879            | 0.28788       |         |
| Department 20 | 0-4           | 0.76923                 | 0.18462            | 0.04615       | 0.80303                 | 0.12121            | 0.07576       |         |
|               | 5-9           | 0.76923                 | 0.15385            | 0.07692       | 0.67949                 | 0.16667            | 0.15385       |         |
|               | 10-14         | 0.88889                 | 0.03704            | 0.07407       | 0.75962                 | 0.18269            | 0.05769       |         |
|               | 15-19         | 0.86364                 | 0.12121            | 0.01515       | 0.82353                 | 0.13235            | 0.04412       |         |
|               | 20-24         | 0.75000                 | 0.20833            | 0.04167       | 0.63077                 | 0.26154            | 0.10769       |         |
|               | 25-29         | 0.68182                 | 0.21212            | 0.10606       | 0.47059                 | 0.39706            | 0.13235       |         |
|               | 30-34         | 0.43860                 | 0.47368            | 0.08772       | 0.32203                 | 0.44068            | 0.23729       |         |
|               | 35-39         | 0.28302                 | 0.45283            | 0.26415       | 0.25455                 | 0.58182            | 0.16364       |         |
|               | 40-44         | 0.35593                 | 0.44068            | 0.20339       | 0.35897                 | 0.35897            | 0.28205       |         |
|               | 45-49         | 0.27660                 | 0.40426            | 0.31915       | 0.30000                 | 0.48000            | 0.22000       |         |
|               | 50-54         | 0.27273                 | 0.30303            | 0.42424       | 0.18605                 | 0.46512            | 0.34884       |         |
|               | 55-59         | 0.15625                 | 0.53125            | 0.31250       | 0.22500                 | 0.50000            | 0.27500       |         |
|               | Department 23 | 0-4                     | 0.75000            | 0.17857       | 0.07143                 | 0.82759            | 0.06897       | 0.10345 |
|               |               | 5-9                     | 0.84615            | 0.07692       | 0.07692                 | 0.68571            | 0.25714       | 0.05714 |
| 10-14         |               | 0.84211                 | 0.15789            | 0.00000       | 0.75000                 | 0.21875            | 0.03125       |         |
| 15-19         |               | 0.78571                 | 0.19048            | 0.02381       | 0.74468                 | 0.25532            | 0.00000       |         |
| 20-24         |               | 0.75439                 | 0.17544            | 0.07018       | 0.62500                 | 0.30000            | 0.07500       |         |
| 25-29         |               | 0.70000                 | 0.23333            | 0.06667       | 0.50000                 | 0.29545            | 0.20455       |         |
| 30-34         |               | 0.51429                 | 0.40000            | 0.08571       | 0.46429                 | 0.39286            | 0.14286       |         |
| 35-39         |               | 0.34375                 | 0.37500            | 0.28125       | 0.40741                 | 0.33333            | 0.25926       |         |
| 40-44         |               | 0.50000                 | 0.47059            | 0.02941       | 0.41667                 | 0.41667            | 0.16667       |         |
| 45-49         |               | 0.39394                 | 0.48485            | 0.12121       | 0.17143                 | 0.62857            | 0.20000       |         |
| 50-54         |               | 0.09375                 | 0.65625            | 0.25000       | 0.10714                 | 0.35714            | 0.53571       |         |
| 55-59         |               | 0.30769                 | 0.34615            | 0.34615       | 0.07692                 | 0.46154            | 0.46154       |         |
| Department 44 |               | 0-4                     | 0.63077            | 0.27692       | 0.09231                 | 0.70213            | 0.25532       | 0.04255 |
|               |               | 5-9                     | 0.62963            | 0.25926       | 0.11111                 | 0.67857            | 0.21429       | 0.10714 |
|               | 10-14         | 0.75000                 | 0.19444            | 0.05556       | 0.77966                 | 0.11864            | 0.10169       |         |
|               | 15-19         | 0.90196                 | 0.09804            | 0.00000       | 0.79245                 | 0.16981            | 0.03774       |         |
|               | 20-24         | 0.54412                 | 0.33824            | 0.11765       | 0.59375                 | 0.34375            | 0.06250       |         |
|               | 25-29         | 0.58333                 | 0.33333            | 0.08333       | 0.40000                 | 0.35556            | 0.24444       |         |
|               | 30-34         | 0.31481                 | 0.53704            | 0.14815       | 0.38710                 | 0.25806            | 0.35484       |         |
|               | 35-39         | 0.52000                 | 0.32000            | 0.16000       | 0.19231                 | 0.57692            | 0.23077       |         |
|               | 40-44         | 0.26471                 | 0.44118            | 0.29412       | 0.44000                 | 0.32000            | 0.24000       |         |
|               | 45-49         | 0.22917                 | 0.56250            | 0.20833       | 0.24000                 | 0.60000            | 0.16000       |         |
|               | 50-54         | 0.20000                 | 0.42857            | 0.37143       | 0.17857                 | 0.50000            | 0.32143       |         |
|               | 55-59         | 0.17241                 | 0.44828            | 0.37931       | 0.14286                 | 0.57143            | 0.28571       |         |
|               | Department 47 | 0-4                     | 0.75926            | 0.18519       | 0.05556                 | 0.67347            | 0.22449       | 0.10204 |
|               |               | 5-9                     | 0.61538            | 0.26923       | 0.11538                 | 0.58333            | 0.18333       | 0.23333 |

| Departments   | Age group | Not- overweight in 2005 | Overweight in 2005 | Obese in 2005 | Not- overweight in 2010 | Overweight in 2010 | Obese in 2010 |
|---------------|-----------|-------------------------|--------------------|---------------|-------------------------|--------------------|---------------|
|               | 10-14     | 0.88462                 | 0.11538            | 0.00000       | 0.64063                 | 0.21875            | 0.14063       |
|               | 15-19     | 0.86047                 | 0.11628            | 0.02326       | 0.74194                 | 0.20968            | 0.04839       |
|               | 20-24     | 0.69231                 | 0.21538            | 0.09231       | 0.67568                 | 0.18919            | 0.13514       |
|               | 25-29     | 0.56410                 | 0.29487            | 0.14103       | 0.48936                 | 0.31915            | 0.19149       |
|               | 30-34     | 0.41463                 | 0.36585            | 0.21951       | 0.30556                 | 0.47222            | 0.22222       |
|               | 35-39     | 0.49123                 | 0.40351            | 0.10526       | 0.39535                 | 0.37209            | 0.23256       |
|               | 40-44     | 0.42000                 | 0.34000            | 0.24000       | 0.17778                 | 0.42222            | 0.40000       |
|               | 45-49     | 0.14286                 | 0.50000            | 0.35714       | 0.37209                 | 0.46512            | 0.16279       |
|               | 50-54     | 0.35556                 | 0.37778            | 0.26667       | 0.16279                 | 0.58140            | 0.25581       |
|               | 55-59     | 0.35897                 | 0.33333            | 0.30769       | 0.22581                 | 0.45161            | 0.32258       |
| Department 70 | 0-4       | 0.82353                 | 0.09412            | 0.08235       | 0.81250                 | 0.15625            | 0.03125       |
|               | 5-9       | 0.63333                 | 0.33333            | 0.03333       | 0.75904                 | 0.20482            | 0.03614       |
|               | 10-14     | 0.80000                 | 0.14286            | 0.05714       | 0.72826                 | 0.13043            | 0.14130       |
|               | 15-19     | 0.86364                 | 0.11364            | 0.02273       | 0.83000                 | 0.13000            | 0.04000       |
|               | 20-24     | 0.70513                 | 0.26923            | 0.02564       | 0.76364                 | 0.16364            | 0.07273       |
|               | 25-29     | 0.56522                 | 0.33333            | 0.10145       | 0.37500                 | 0.44643            | 0.17857       |
|               | 30-34     | 0.49057                 | 0.41509            | 0.09434       | 0.51724                 | 0.34483            | 0.13793       |
|               | 35-39     | 0.37681                 | 0.40580            | 0.21739       | 0.37333                 | 0.48000            | 0.14667       |
|               | 40-44     | 0.35593                 | 0.42373            | 0.22034       | 0.25424                 | 0.50847            | 0.23729       |
|               | 45-49     | 0.19565                 | 0.36957            | 0.43478       | 0.22449                 | 0.53061            | 0.24490       |
| Department 88 | 0-4       | 0.78571                 | 0.14286            | 0.07143       | 0.50000                 | 0.33333            | 0.16667       |
|               | 5-9       | 0.36364                 | 0.54545            | 0.09091       | 0.40000                 | 0.40000            | 0.20000       |
|               | 10-14     | 0.81818                 | 0.18182            | 0.00000       | 0.50000                 | 0.33333            | 0.16667       |
|               | 15-19     | 0.64286                 | 0.28571            | 0.07143       | 0.16667                 | 0.33333            | 0.50000       |
|               | 20-24     | 0.61905                 | 0.23810            | 0.14286       | 0.33333                 | 0.33333            | 0.33333       |
|               | 25-29     | 0.45833                 | 0.20833            | 0.33333       | 0.50000                 | 0.30000            | 0.20000       |
|               | 30-34     | 0.13043                 | 0.52174            | 0.34783       | 0.30769                 | 0.46154            | 0.23077       |
|               | 35-39     | 0.33333                 | 0.45833            | 0.20833       | 0.14286                 | 0.42857            | 0.42857       |
|               | 40-44     | 0.29167                 | 0.37500            | 0.33333       | 0.37500                 | 0.50000            | 0.12500       |
|               | 45-49     | 0.34615                 | 0.53846            | 0.11538       | 0.27273                 | 0.54545            | 0.18182       |
|               | 50-54     | 0.21053                 | 0.47368            | 0.31579       | 0.11111                 | 0.55556            | 0.33333       |
|               | 55-59     | 0.35294                 | 0.41176            | 0.23529       | 0.00000                 | 0.83333            | 0.16667       |

**Table 25. Mortality rates and population size by age group at the department level without segregate by socioeconomic status (Caribe region) †**

| Departments  | Age group | Mortality rates (R) (%/year) | Not- overweight population in 2005 (Number of people)1 | Overweight population in 2005 (Number of people)2 | Obese population in 2005 (Number of people)3 |
|--------------|-----------|------------------------------|--------------------------------------------------------|---------------------------------------------------|----------------------------------------------|
| Department 8 | 0-4       | 0.01938                      | 158802                                                 | 39701                                             | 8411                                         |
|              | 5-9       | 0.00050                      | 175670                                                 | 18543                                             | 11711                                        |
|              | 10-14     | 0.00045                      | 168986                                                 | 27174                                             | 8492                                         |
|              | 15-19     | 0.00144                      | 177237                                                 | 20851                                             | 3841                                         |

| Departments          | Age   | Mortality rates (R) | Not- overweight population in 2005 (Number of persons) | Overweight population in 2005 (Number of persons) | Obese population in 2005 |
|----------------------|-------|---------------------|--------------------------------------------------------|---------------------------------------------------|--------------------------|
|                      | 20-24 | 0.00314             | 151239                                                 | 31822                                             | 10170                    |
|                      | 25-29 | 0.00362             | 103166                                                 | 46312                                             | 19579                    |
|                      | 30-34 | 0.00373             | 76965                                                  | 47160                                             | 22259                    |
|                      | 35-39 | 0.00360             | 74259                                                  | 51470                                             | 21217                    |
|                      | 40-44 | 0.00450             | 60134                                                  | 53369                                             | 27060                    |
|                      | 45-49 | 0.00525             | 44781                                                  | 45139                                             | 24003                    |
|                      | 50-54 | 0.00763             | 33602                                                  | 32284                                             | 23390                    |
|                      | 55-59 | 0.01129             | 25793                                                  | 28544                                             | 13756                    |
| <b>Department 13</b> | 0-4   | 0.00398             | 121669                                                 | 21534                                             | 5384                     |
|                      | 5-9   | 0.00020             | 131004                                                 | 15948                                             | 5696                     |
|                      | 10-14 | 0.00024             | 127074                                                 | 16456                                             | 6399                     |
|                      | 15-19 | 0.00085             | 128558                                                 | 8815                                              | 1469                     |
|                      | 20-24 | 0.00129             | 106653                                                 | 13566                                             | 6081                     |
|                      | 25-29 | 0.00141             | 79035                                                  | 27443                                             | 4940                     |
|                      | 30-34 | 0.00144             | 52668                                                  | 33214                                             | 12811                    |
|                      | 35-39 | 0.00145             | 50616                                                  | 32900                                             | 13666                    |
|                      | 40-44 | 0.00193             | 44329                                                  | 31081                                             | 13757                    |
|                      | 45-49 | 0.00286             | 29328                                                  | 30154                                             | 13218                    |
|                      | 50-54 | 0.00338             | 27228                                                  | 16756                                             | 12567                    |
|                      | 55-59 | 0.00512             | 16764                                                  | 17582                                             | 10222                    |
| <b>Department 20</b> | 0-4   | 0.00407             | 61799                                                  | 12086                                             | 1140                     |
|                      | 5-9   | 0.00030             | 63879                                                  | 8901                                              | 3142                     |
|                      | 10-14 | 0.00028             | 69382                                                  | 3679                                              | 2102                     |
|                      | 15-19 | 0.00084             | 58173                                                  | 8573                                              | 1225                     |
|                      | 20-24 | 0.00215             | 42807                                                  | 10084                                             | 2470                     |
|                      | 25-29 | 0.00230             | 34014                                                  | 11055                                             | 4890                     |
|                      | 30-34 | 0.00230             | 23088                                                  | 16711                                             | 4618                     |
|                      | 35-39 | 0.00237             | 17984                                                  | 16729                                             | 7946                     |
|                      | 40-44 | 0.00281             | 16554                                                  | 14689                                             | 6062                     |
|                      | 45-49 | 0.00328             | 9691                                                   | 13528                                             | 6663                     |
|                      | 50-54 | 0.00504             | 9930                                                   | 8164                                              | 5296                     |
|                      | 55-59 | 0.00651             | 6095                                                   | 7238                                              | 4952                     |
| <b>Department 23</b> | 0-4   | 0.01525             | 65180                                                  | 12393                                             | 2295                     |
|                      | 5-9   | 0.00109             | 67508                                                  | 7418                                              | 5193                     |
|                      | 10-14 | 0.00110             | 75442                                                  | 6723                                              | 1494                     |
|                      | 15-19 | 0.00399             | 63497                                                  | 10499                                             | 2500                     |
|                      | 20-24 | 0.00906             | 53375                                                  | 10543                                             | 2306                     |
|                      | 25-29 | 0.01093             | 40139                                                  | 12961                                             | 4181                     |
|                      | 30-34 | 0.01080             | 28747                                                  | 16660                                             | 4573                     |
|                      | 35-39 | 0.01026             | 26376                                                  | 15825                                             | 9043                     |
|                      | 40-44 | 0.01329             | 20481                                                  | 18466                                             | 7722                     |
|                      | 45-49 | 0.01586             | 17831                                                  | 15974                                             | 4086                     |
|                      | 50-54 | 0.02344             | 9589                                                   | 13819                                             | 6205                     |
|                      | 55-59 | 0.03450             | 9510                                                   | 8111                                              | 4755                     |
| <b>Department 44</b> | 0-4   | 0.00440             | 34473                                                  | 12241                                             | 2814                     |
|                      | 5-9   | 0.00027             | 38220                                                  | 4303                                              | 1266                     |

| Departments          | Age   | Mortality rates (R) | Not- overweight population in 2005 (Number of persons) | Overweight population in 2005 (Number of persons) | Obese population in 2005 |
|----------------------|-------|---------------------|--------------------------------------------------------|---------------------------------------------------|--------------------------|
|                      | 10-14 | 0.00035             | 32445                                                  | 6549                                              | 595                      |
|                      | 15-19 | 0.00085             | 36989                                                  | 3144                                              | 925                      |
|                      | 20-24 | 0.00242             | 23393                                                  | 8743                                              | 2127                     |
|                      | 25-29 | 0.00217             | 18637                                                  | 8030                                              | 2776                     |
|                      | 30-34 | 0.00243             | 11175                                                  | 9101                                              | 3571                     |
|                      | 35-39 | 0.00260             | 10057                                                  | 9110                                              | 3904                     |
|                      | 40-44 | 0.00225             | 7802                                                   | 8726                                              | 3901                     |
|                      | 45-49 | 0.00271             | 5262                                                   | 7016                                              | 4678                     |
|                      | 50-54 | 0.00425             | 3792                                                   | 5201                                              | 3251                     |
|                      | 55-59 | 0.00544             | 3523                                                   | 3523                                              | 2694                     |
| <b>Department 47</b> | 0-4   | 0.00367             | 71559                                                  | 16117                                             | 5480                     |
|                      | 5-9   | 0.00045             | 78818                                                  | 11260                                             | 4636                     |
|                      | 10-14 | 0.00036             | 78621                                                  | 7609                                              | 507                      |
|                      | 15-19 | 0.00077             | 69426                                                  | 6899                                              | 1725                     |
|                      | 20-24 | 0.00126             | 54854                                                  | 11328                                             | 2087                     |
|                      | 25-29 | 0.00154             | 36590                                                  | 18151                                             | 6915                     |
|                      | 30-34 | 0.00157             | 26317                                                  | 20861                                             | 7702                     |
|                      | 35-39 | 0.00173             | 24083                                                  | 19920                                             | 8622                     |
|                      | 40-44 | 0.00215             | 21299                                                  | 17158                                             | 8579                     |
|                      | 45-49 | 0.00280             | 11704                                                  | 18031                                             | 9173                     |
|                      | 50-54 | 0.00451             | 12884                                                  | 10863                                             | 7326                     |
|                      | 55-59 | 0.00626             | 9886                                                   | 7469                                              | 6591                     |
| <b>Department 70</b> | 0-4   | 0.00295             | 40868                                                  | 8174                                              | 2189                     |
|                      | 5-9   | 0.00022             | 45197                                                  | 7951                                              | 1255                     |
|                      | 10-14 | 0.00029             | 50356                                                  | 4997                                              | 769                      |
|                      | 15-19 | 0.00047             | 44795                                                  | 4508                                              | 1409                     |
|                      | 20-24 | 0.00110             | 33633                                                  | 7579                                              | 1421                     |
|                      | 25-29 | 0.00139             | 24874                                                  | 10613                                             | 1990                     |
|                      | 30-34 | 0.00124             | 16823                                                  | 12235                                             | 4129                     |
|                      | 35-39 | 0.00178             | 15398                                                  | 13706                                             | 5076                     |
|                      | 40-44 | 0.00164             | 12988                                                  | 12811                                             | 4626                     |
|                      | 45-49 | 0.00281             | 8282                                                   | 9444                                              | 7556                     |
|                      | 50-54 | 0.00387             | 6860                                                   | 8861                                              | 4431                     |
|                      | 55-59 | 0.00514             | 7136                                                   | 5769                                              | 3644                     |
| <b>Department 88</b> | 0-4   | 0.00204             | 2873                                                   | 1149                                              | 383                      |
|                      | 5-9   | 0.00021             | 3082                                                   | 1110                                              | 493                      |
|                      | 10-14 | 0.00040             | 3376                                                   | 1206                                              | 362                      |
|                      | 15-19 | 0.00084             | 3121                                                   | 1040                                              | 578                      |
|                      | 20-24 | 0.00207             | 2988                                                   | 934                                               | 436                      |
|                      | 25-29 | 0.00075             | 1970                                                   | 1275                                              | 753                      |
|                      | 30-34 | 0.00086             | 1142                                                   | 1442                                              | 901                      |
|                      | 35-39 | 0.00190             | 1748                                                   | 1447                                              | 1025                     |
|                      | 40-44 | 0.00244             | 1501                                                   | 1705                                              | 1296                     |
|                      | 45-49 | 0.00359             | 1149                                                   | 1666                                              | 804                      |
|                      | 50-54 | 0.00436             | 826                                                    | 782                                               | 913                      |

| Departments | Age group | Mortality rates (R) | Not- overweight population in 2005 (Number of people) <sup>1</sup> | Overweight population in 2005 (Number of people) <sup>2</sup> | Obese population in 2005 (Number of people) <sup>3</sup> |
|-------------|-----------|---------------------|--------------------------------------------------------------------|---------------------------------------------------------------|----------------------------------------------------------|
|             | 55-59     | 0.00848             | 388                                                                | 874                                                           | 388                                                      |

†Values used in this table are for the urban population

<sup>1</sup> Initial value used in the stock of not-overweight population in 2005.

<sup>2</sup> Initial value used in the stock of overweight population in 2005.

<sup>3</sup> Initial value used in the stock of obese population in 2005.

**Table 26. Mortality rates and population size by age group at the department level for the lower socioeconomic status population (Caribe region) †**

| Departments   | Age group | Mortality rates (R) (%/year) | Not- overweight population in 2005 (Number of people) <sup>1</sup> | Overweight population in 2005 (Number of people) <sup>2</sup> | Obese population in 2005 (Number of people) <sup>3</sup> |
|---------------|-----------|------------------------------|--------------------------------------------------------------------|---------------------------------------------------------------|----------------------------------------------------------|
| Department 8  | 0-4       | 0.01938                      | 67394                                                              | 16849                                                         | 3570                                                     |
|               | 5-9       | 0.00050                      | 59112                                                              | 6240                                                          | 3941                                                     |
|               | 10-14     | 0.00045                      | 53991                                                              | 8682                                                          | 2713                                                     |
|               | 15-19     | 0.00144                      | 63574                                                              | 7479                                                          | 1378                                                     |
|               | 20-24     | 0.00314                      | 48016                                                              | 10103                                                         | 3229                                                     |
|               | 25-29     | 0.00362                      | 28951                                                              | 12996                                                         | 5494                                                     |
|               | 30-34     | 0.00373                      | 21225                                                              | 13005                                                         | 6139                                                     |
|               | 35-39     | 0.00360                      | 22238                                                              | 15414                                                         | 6354                                                     |
|               | 40-44     | 0.00450                      | 18812                                                              | 16696                                                         | 8465                                                     |
|               | 45-49     | 0.00525                      | 10280                                                              | 10362                                                         | 5510                                                     |
| Department 13 | 0-4       | 0.00398                      | 52759                                                              | 6999                                                          | 1077                                                     |
|               | 5-9       | 0.00020                      | 61515                                                              | 7974                                                          | 2278                                                     |
|               | 10-14     | 0.00024                      | 56680                                                              | 5485                                                          | 1828                                                     |
|               | 15-19     | 0.00085                      | 43343                                                              | 735                                                           | 735                                                      |
|               | 20-24     | 0.00129                      | 35083                                                              | 5613                                                          | 3274                                                     |
|               | 25-29     | 0.00141                      | 28540                                                              | 7684                                                          | 2195                                                     |
|               | 30-34     | 0.00144                      | 19929                                                              | 9490                                                          | 4270                                                     |
|               | 35-39     | 0.00145                      | 18222                                                              | 11135                                                         | 2531                                                     |
|               | 40-44     | 0.00193                      | 20381                                                              | 10191                                                         | 5095                                                     |
|               | 45-49     | 0.00286                      | 10740                                                              | 8261                                                          | 2478                                                     |
| Department 20 | 0-4       | 0.00407                      | 34662                                                              | 4789                                                          | 228                                                      |
|               | 5-9       | 0.00030                      | 29845                                                              | 3142                                                          | 524                                                      |
|               | 10-14     | 0.00028                      | 31537                                                              | 1051                                                          | 526                                                      |
|               | 15-19     | 0.00084                      | 21126                                                              | 2756                                                          | 612                                                      |
|               | 20-24     | 0.00215                      | 19757                                                              | 4116                                                          | 1235                                                     |
|               | 25-29     | 0.00230                      | 13606                                                              | 4039                                                          | 1913                                                     |
|               | 30-34     | 0.00230                      | 12094                                                              | 4837                                                          | 1979                                                     |
|               | 35-39     | 0.00237                      | 8574                                                               | 6482                                                          | 2509                                                     |
|               | 40-44     | 0.00281                      | 6062                                                               | 3730                                                          | 933                                                      |
| 45-49         | 0.00328   | 3634                         | 5250                                                               | 1010                                                          |                                                          |

| Departments   | Age     | Mortality rates (R) | Not- overweight population in 2005 (Number of persons) | Overweight population in 2005 (Number of persons) | Obese population in 2005 |
|---------------|---------|---------------------|--------------------------------------------------------|---------------------------------------------------|--------------------------|
|               | 50-54   | 0.00504             | 4193                                                   | 2648                                              | 662                      |
|               | 55-59   | 0.00651             | 2667                                                   | 952                                               | 952                      |
| Department 23 | 0-4     | 0.01525             | 41311                                                  | 7344                                              | 918                      |
|               | 5-9     | 0.00109             | 44511                                                  | 5193                                              | 2226                     |
|               | 10-14   | 0.00110             | 44070                                                  | 1494                                              | 747                      |
|               | 15-19   | 0.00399             | 33498                                                  | 4500                                              | 0                        |
|               | 20-24   | 0.00906             | 28005                                                  | 4613                                              | 988                      |
|               | 25-29   | 0.01093             | 20905                                                  | 7526                                              | 836                      |
|               | 30-34   | 0.01080             | 15027                                                  | 8820                                              | 2613                     |
|               | 35-39   | 0.01026             | 16202                                                  | 6782                                              | 4522                     |
|               | 40-44   | 0.01329             | 9737                                                   | 6043                                              | 5372                     |
|               | 45-49   | 0.01586             | 10030                                                  | 6687                                              | 1857                     |
|               | 50-54   | 0.02344             | 7333                                                   | 5923                                              | 3102                     |
| 55-59         | 0.03450 | 5874                | 2797                                                   | 839                                               |                          |
| Department 44 | 0-4     | 0.00440             | 19277                                                  | 5910                                              | 1266                     |
|               | 5-9     | 0.00027             | 24299                                                  | 1772                                              | 0                        |
|               | 10-14   | 0.00035             | 15478                                                  | 3274                                              | 0                        |
|               | 15-19   | 0.00085             | 16090                                                  | 1665                                              | 370                      |
|               | 20-24   | 0.00242             | 10515                                                  | 2954                                              | 709                      |
|               | 25-29   | 0.00217             | 9219                                                   | 3470                                              | 1090                     |
|               | 30-34   | 0.00243             | 5415                                                   | 2765                                              | 1843                     |
|               | 35-39   | 0.00260             | 3668                                                   | 3904                                              | 1420                     |
|               | 40-44   | 0.00225             | 3593                                                   | 2977                                              | 616                      |
|               | 45-49   | 0.00271             | 2456                                                   | 1403                                              | 1520                     |
|               | 50-54   | 0.00425             | 1842                                                   | 1517                                              | 867                      |
| 55-59         | 0.00544 | 1865                | 829                                                    | 725                                               |                          |
| Department 47 | 0-4     | 0.00367             | 39648                                                  | 8703                                              | 2256                     |
|               | 5-9     | 0.00045             | 45039                                                  | 3974                                              | 0                        |
|               | 10-14   | 0.00036             | 39057                                                  | 3551                                              | 507                      |
|               | 15-19   | 0.00077             | 37947                                                  | 2156                                              | 431                      |
|               | 20-24   | 0.00126             | 27725                                                  | 3279                                              | 0                        |
|               | 25-29   | 0.00154             | 15558                                                  | 8067                                              | 1152                     |
|               | 30-34   | 0.00157             | 13479                                                  | 8665                                              | 3209                     |
|               | 35-39   | 0.00173             | 9811                                                   | 7433                                              | 3865                     |
|               | 40-44   | 0.00215             | 7691                                                   | 5621                                              | 2071                     |
|               | 45-49   | 0.00280             | 7275                                                   | 6643                                              | 2214                     |
|               | 50-54   | 0.00451             | 7074                                                   | 5305                                              | 2779                     |
| 55-59         | 0.00626 | 4833                | 2636                                                   | 1977                                              |                          |
| Department 70 | 0-4     | 0.00295             | 23645                                                  | 5692                                              | 584                      |
|               | 5-9     | 0.00022             | 25110                                                  | 1674                                              | 418                      |
|               | 10-14   | 0.00029             | 28061                                                  | 1153                                              | 0                        |
|               | 15-19   | 0.00047             | 24510                                                  | 2254                                              | 563                      |
|               | 20-24   | 0.00110             | 14527                                                  | 2842                                              | 1105                     |
|               | 25-29   | 0.00139             | 12105                                                  | 3980                                              | 332                      |
|               | 30-34   | 0.00124             | 8870                                                   | 6576                                              | 1376                     |
|               | 35-39   | 0.00178             | 6938                                                   | 5415                                              | 1523                     |



| Departments   | Age group | Mortality rates (R) | Not- overweight population in 2005 (Number of people) <sup>1</sup> | Overweight population in 2005 (Number of people) <sup>2</sup> | Obese population in 2005 (Number of people) <sup>3</sup> |
|---------------|-----------|---------------------|--------------------------------------------------------------------|---------------------------------------------------------------|----------------------------------------------------------|
|               | 40-44     | 0.00164             | 6405                                                               | 5160                                                          | 1245                                                     |
|               | 45-49     | 0.00281             | 4214                                                               | 4940                                                          | 2325                                                     |
|               | 50-54     | 0.00387             | 3001                                                               | 2716                                                          | 1572                                                     |
|               | 55-59     | 0.00514             | 3492                                                               | 1974                                                          | 1518                                                     |
| Department 88 | 0-4       | 0.00204             | 1101                                                               | 431                                                           | 48                                                       |
|               | 5-9       | 0.00021             | 1849                                                               | 123                                                           | 123                                                      |
|               | 10-14     | 0.00040             | 1567                                                               | 362                                                           | 121                                                      |
|               | 15-19     | 0.00084             | 1271                                                               | 462                                                           | 0                                                        |
|               | 20-24     | 0.00207             | 1120                                                               | 373                                                           | 124                                                      |
|               | 25-29     | 0.00075             | 869                                                                | 174                                                           | 58                                                       |
|               | 30-34     | 0.00086             | 481                                                                | 180                                                           | 120                                                      |
|               | 35-39     | 0.00190             | 663                                                                | 241                                                           | 181                                                      |
|               | 40-44     | 0.00244             | 341                                                                | 409                                                           | 409                                                      |
|               | 45-49     | 0.00359             | 460                                                                | 287                                                           | 287                                                      |
|               | 50-54     | 0.00436             | 217                                                                | 43                                                            | 174                                                      |
|               | 55-59     | 0.00848             | 97                                                                 | 146                                                           | 49                                                       |

†Values used in this table are for the urban population

<sup>1</sup> Initial value used in the stock of not-overweight population in 2005 for lower SES.

<sup>2</sup> Initial value used in the stock of overweight population in 2005 for lower SES.

<sup>3</sup> Initial value used in the stock of obese population in 2005 for lower SES.

**Table 27. Mortality rates and population size by age group at the department level for the middle socioeconomic status population (Caribe region) †**

| Departments   | Age group | Mortality rates (R) (%/year) | Not- overweight population in 2005 (Number of people) <sup>1</sup> | Overweight population in 2005 (Number of people) <sup>2</sup> | Obese population in 2005 (Number of people) <sup>3</sup> |
|---------------|-----------|------------------------------|--------------------------------------------------------------------|---------------------------------------------------------------|----------------------------------------------------------|
| Department 8  | 0-4       | 0.01938                      | 45084                                                              | 9757                                                          | 2355                                                     |
|               | 5-9       | 0.00050                      | 50749                                                              | 4880                                                          | 976                                                      |
|               | 10-14     | 0.00045                      | 55196                                                              | 5095                                                          | 1698                                                     |
|               | 15-19     | 0.00144                      | 43349                                                              | 6036                                                          | 549                                                      |
|               | 20-24     | 0.00314                      | 44945                                                              | 6889                                                          | 3609                                                     |
|               | 25-29     | 0.00362                      | 33887                                                              | 13178                                                         | 6024                                                     |
|               | 30-34     | 0.00373                      | 21128                                                              | 14337                                                         | 3773                                                     |
|               | 35-39     | 0.00360                      | 23574                                                              | 12966                                                         | 5501                                                     |
|               | 40-44     | 0.00450                      | 13906                                                              | 18040                                                         | 7517                                                     |
|               | 45-49     | 0.00525                      | 13255                                                              | 16121                                                         | 6090                                                     |
|               | 50-54     | 0.00763                      | 8565                                                               | 8565                                                          | 5930                                                     |
|               | 55-59     | 0.01129                      | 9285                                                               | 5502                                                          | 2407                                                     |
| Department 13 | 0-4       | 0.00398                      | 32302                                                              | 7537                                                          | 538                                                      |
|               | 5-9       | 0.00020                      | 30757                                                              | 2278                                                          | 1139                                                     |
|               | 10-14     | 0.00024                      | 25598                                                              | 2743                                                          | 914                                                      |
|               | 15-19     | 0.00085                      | 29385                                                              | 0                                                             | 0                                                        |
|               | 20-24     | 0.00129                      | 22453                                                              | 3274                                                          | 936                                                      |
|               | 25-29     | 0.00141                      | 18661                                                              | 6586                                                          | 549                                                      |
|               | 30-34     | 0.00144                      | 9964                                                               | 10439                                                         | 2847                                                     |
|               | 35-39     | 0.00145                      | 12654                                                              | 7592                                                          | 5568                                                     |

| Departments   | Age     | Mortality rates (R) | Not- overweight population in 2005 (Number of persons) | Overweight population in 2005 (Number of persons) | Obese population in 2005 |
|---------------|---------|---------------------|--------------------------------------------------------|---------------------------------------------------|--------------------------|
|               | 40-44   | 0.00193             | 10191                                                  | 4586                                              | 3567                     |
|               | 45-49   | 0.00286             | 5370                                                   | 4957                                              | 826                      |
|               | 50-54   | 0.00338             | 4608                                                   | 3351                                              | 3351                     |
|               | 55-59   | 0.00512             | 2044                                                   | 4089                                              | 2044                     |
| Department 20 | 0-4     | 0.00407             | 15735                                                  | 4561                                              | 228                      |
|               | 5-9     | 0.00030             | 23562                                                  | 3665                                              | 1571                     |
|               | 10-14   | 0.00028             | 25230                                                  | 2102                                              | 526                      |
|               | 15-19   | 0.00084             | 19595                                                  | 3368                                              | 306                      |
|               | 20-24   | 0.00215             | 11937                                                  | 2881                                              | 617                      |
|               | 25-29   | 0.00230             | 10842                                                  | 4039                                              | 1488                     |
|               | 30-34   | 0.00230             | 5497                                                   | 5937                                              | 1539                     |
|               | 35-39   | 0.00237             | 6273                                                   | 5228                                              | 2509                     |
|               | 40-44   | 0.00281             | 5596                                                   | 4896                                              | 2332                     |
|               | 45-49   | 0.00328             | 3432                                                   | 4442                                              | 2625                     |
|               | 50-54   | 0.00504             | 3751                                                   | 3310                                              | 1545                     |
| 55-59         | 0.00651 | 2476                | 3048                                                   | 2095                                              |                          |
| Department 23 | 0-4     | 0.01525             | 14229                                                  | 2754                                              | 459                      |
|               | 5-9     | 0.00109             | 14837                                                  | 1484                                              | 2226                     |
|               | 10-14   | 0.00110             | 19421                                                  | 2988                                              | 747                      |
|               | 15-19   | 0.00399             | 13499                                                  | 2000                                              | 2000                     |
|               | 20-24   | 0.00906             | 11202                                                  | 2636                                              | 0                        |
|               | 25-29   | 0.01093             | 10453                                                  | 2509                                              | 2509                     |
|               | 30-34   | 0.01080             | 7840                                                   | 3267                                              | 980                      |
|               | 35-39   | 0.01026             | 6029                                                   | 4522                                              | 1130                     |
|               | 40-44   | 0.01329             | 5036                                                   | 7051                                              | 2014                     |
|               | 45-49   | 0.01586             | 2972                                                   | 3343                                              | 743                      |
|               | 50-54   | 0.02344             | 1410                                                   | 1974                                              | 846                      |
| 55-59         | 0.03450 | 1399                | 2797                                                   | 1399                                              |                          |
| Department 44 | 0-4     | 0.00440             | 9427                                                   | 3799                                              | 704                      |
|               | 5-9     | 0.00027             | 9618                                                   | 759                                               | 506                      |
|               | 10-14   | 0.00035             | 8930                                                   | 1191                                              | 0                        |
|               | 15-19   | 0.00085             | 12391                                                  | 555                                               | 555                      |
|               | 20-24   | 0.00242             | 8506                                                   | 3072                                              | 473                      |
|               | 25-29   | 0.00217             | 5254                                                   | 2181                                              | 1090                     |
|               | 30-34   | 0.00243             | 3802                                                   | 2995                                              | 806                      |
|               | 35-39   | 0.00260             | 3313                                                   | 3313                                              | 1538                     |
|               | 40-44   | 0.00225             | 2361                                                   | 2669                                              | 1232                     |
|               | 45-49   | 0.00271             | 1520                                                   | 2456                                              | 1988                     |
|               | 50-54   | 0.00425             | 1192                                                   | 2059                                              | 975                      |
| 55-59         | 0.00544 | 1140                | 1347                                                   | 829                                               |                          |
| Department 47 | 0-4     | 18696               | 4190                                                   | 2256                                              | 18696                    |
|               | 5-9     | 23182               | 2649                                                   | 2649                                              | 23182                    |
|               | 10-14   | 27898               | 2536                                                   | 0                                                 | 27898                    |
|               | 15-19   | 15524               | 2587                                                   | 862                                               | 15524                    |
|               | 20-24   | 13713               | 3876                                                   | 298                                               | 13713                    |
|               | 25-29   | 8355                | 3457                                                   | 2593                                              | 8355                     |

| Departments   | Age     | Mortality rates (R) | Not- overweight population in 2005 (Number of people)1 | Overweight population in 2005 (Number of people)2 | Obese population in 2005 (Number of people)3 |
|---------------|---------|---------------------|--------------------------------------------------------|---------------------------------------------------|----------------------------------------------|
|               | 30-34   | 7382                | 7382                                                   | 1605                                              | 7382                                         |
|               | 35-39   | 5946                | 5649                                                   | 2973                                              | 5946                                         |
|               | 40-44   | 7396                | 6508                                                   | 2958                                              | 7396                                         |
|               | 45-49   | 2531                | 4745                                                   | 2214                                              | 2531                                         |
|               | 50-54   | 1768                | 1263                                                   | 1516                                              | 1768                                         |
|               | 55-59   | 1977                | 1977                                                   | 1977                                              | 1977                                         |
| Department 70 | 0-4     | 0.00295             | 7006                                                   | 1314                                              | 584                                          |
|               | 5-9     | 0.00022             | 12136                                                  | 2092                                              | 418                                          |
|               | 10-14   | 0.00029             | 11532                                                  | 1922                                              | 0                                            |
|               | 15-19   | 0.00047             | 9579                                                   | 845                                               | 563                                          |
|               | 20-24   | 0.00110             | 10421                                                  | 1421                                              | 0                                            |
|               | 25-29   | 0.00139             | 6301                                                   | 2819                                              | 497                                          |
|               | 30-34   | 0.00124             | 3976                                                   | 2294                                              | 1988                                         |
|               | 35-39   | 0.00178             | 4061                                                   | 3553                                              | 1015                                         |
|               | 40-44   | 0.00164             | 2847                                                   | 3203                                              | 1068                                         |
|               | 45-49   | 0.00281             | 2761                                                   | 2034                                              | 2325                                         |
|               | 50-54   | 0.00387             | 3001                                                   | 2430                                              | 1143                                         |
| Department 88 | 0-4     | 0.00204             | 718                                                    | 527                                               | 239                                          |
|               | 5-9     | 0.00021             | 740                                                    | 247                                               | 247                                          |
|               | 10-14   | 0.00040             | 723                                                    | 603                                               | 241                                          |
|               | 15-19   | 0.00084             | 809                                                    | 116                                               | 462                                          |
|               | 20-24   | 0.00207             | 1058                                                   | 249                                               | 124                                          |
|               | 25-29   | 0.00075             | 464                                                    | 811                                               | 232                                          |
|               | 30-34   | 0.00086             | 481                                                    | 541                                               | 300                                          |
|               | 35-39   | 0.00190             | 603                                                    | 542                                               | 542                                          |
|               | 40-44   | 0.00244             | 682                                                    | 682                                               | 341                                          |
|               | 45-49   | 0.00359             | 172                                                    | 574                                               | 345                                          |
|               | 50-54   | 0.00436             | 435                                                    | 348                                               | 478                                          |
| 55-59         | 0.00848 | 0                   | 388                                                    | 146                                               |                                              |

†Values used in this table are for the urban population

1 Initial value used in the stock of not-overweight population in 2005 for middle SES.

2 Initial value used in the stock of overweight population in 2005 for middle SES.

3 Initial value used in the stock of obese population in 2005 for middle SES.

**Table 28. Mortality rates and population size by age group at the department level for the higher socioeconomic status population (Caribe region) †**

| Departments  | Age group | Mortality rates (R) (%/year) | Not- overweight population in 2005 (Number of people)1 | Overweight population in 2005 (Number of people)2 | Obese population in 2005 (Number of people)3 |
|--------------|-----------|------------------------------|--------------------------------------------------------|---------------------------------------------------|----------------------------------------------|
| Department 8 | 0-4       | 0.01938                      | 45084                                                  | 12785                                             | 4037                                         |
|              | 5-9       | 0.00050                      | 59533                                                  | 10735                                             | 9759                                         |
|              | 10-14     | 0.00045                      | 52649                                                  | 18682                                             | 5944                                         |
|              | 15-19     | 0.00144                      | 64749                                                  | 11523                                             | 3292                                         |
|              | 20-24     | 0.00314                      | 55771                                                  | 15747                                             | 4921                                         |

| Departments   | Age   | Mortality rates (R) | Not- overweight population in 2005 (Number of persons) | Overweight population in 2005 (Number of persons) | Obese population in 2005 |
|---------------|-------|---------------------|--------------------------------------------------------|---------------------------------------------------|--------------------------|
|               | 25-29 | 0.00362             | 41793                                                  | 19202                                             | 7530                     |
|               | 30-34 | 0.00373             | 27919                                                  | 24146                                             | 14714                    |
|               | 35-39 | 0.00360             | 24360                                                  | 25932                                             | 10608                    |
|               | 40-44 | 0.00450             | 20295                                                  | 22550                                             | 14282                    |
|               | 45-49 | 0.00525             | 18987                                                  | 21853                                             | 11464                    |
|               | 50-54 | 0.00763             | 10212                                                  | 16801                                             | 12518                    |
|               | 55-59 | 0.01129             | 8254                                                   | 18571                                             | 7910                     |
| Department 13 | 0-4   | 0.00398             | 36608                                                  | 6999                                              | 3769                     |
|               | 5-9   | 0.00020             | 38732                                                  | 5696                                              | 2278                     |
|               | 10-14 | 0.00024             | 44796                                                  | 8228                                              | 3657                     |
|               | 15-19 | 0.00085             | 55831                                                  | 8081                                              | 735                      |
|               | 20-24 | 0.00129             | 49117                                                  | 4678                                              | 1871                     |
|               | 25-29 | 0.00141             | 31833                                                  | 13172                                             | 2195                     |
|               | 30-34 | 0.00144             | 22776                                                  | 13286                                             | 5694                     |
|               | 35-39 | 0.00145             | 19740                                                  | 14172                                             | 5568                     |
|               | 40-44 | 0.00193             | 13757                                                  | 16305                                             | 5095                     |
|               | 45-49 | 0.00286             | 13218                                                  | 16936                                             | 9914                     |
| Department 20 | 50-54 | 0.00338             | 10891                                                  | 9216                                              | 8797                     |
|               | 55-59 | 0.00512             | 6133                                                   | 8586                                              | 6951                     |
|               | 0-4   | 0.00407             | 11402                                                  | 2736                                              | 684                      |
|               | 5-9   | 0.00030             | 10472                                                  | 2094                                              | 1047                     |
|               | 10-14 | 0.00028             | 12615                                                  | 526                                               | 1051                     |
|               | 15-19 | 0.00084             | 17452                                                  | 2449                                              | 306                      |
|               | 20-24 | 0.00215             | 11113                                                  | 3087                                              | 617                      |
|               | 25-29 | 0.00230             | 9566                                                   | 2976                                              | 1488                     |
|               | 30-34 | 0.00230             | 5497                                                   | 5937                                              | 1099                     |
|               | 35-39 | 0.00237             | 3137                                                   | 5019                                              | 2928                     |
| Department 23 | 40-44 | 0.00281             | 4896                                                   | 6062                                              | 2798                     |
|               | 45-49 | 0.00328             | 2625                                                   | 3836                                              | 3029                     |
|               | 50-54 | 0.00504             | 1986                                                   | 2207                                              | 3089                     |
|               | 55-59 | 0.00651             | 952                                                    | 3238                                              | 1905                     |
|               | 0-4   | 0.01525             | 9639                                                   | 2295                                              | 918                      |
|               | 5-9   | 0.00109             | 8160                                                   | 742                                               | 742                      |
|               | 10-14 | 0.00110             | 11951                                                  | 2241                                              | 0                        |
|               | 15-19 | 0.00399             | 16499                                                  | 4000                                              | 500                      |
|               | 20-24 | 0.00906             | 14167                                                  | 3295                                              | 1318                     |
|               | 25-29 | 0.01093             | 8780                                                   | 2927                                              | 836                      |
| Department 44 | 30-34 | 0.01080             | 5880                                                   | 4573                                              | 980                      |
|               | 35-39 | 0.01026             | 4145                                                   | 4522                                              | 3391                     |
|               | 40-44 | 0.01329             | 5708                                                   | 5372                                              | 336                      |
|               | 45-49 | 0.01586             | 4829                                                   | 5944                                              | 1486                     |
|               | 50-54 | 0.02344             | 846                                                    | 5923                                              | 2256                     |
|               | 55-59 | 0.03450             | 2238                                                   | 2517                                              | 2517                     |
|               | 0-4   | 0.00440             | 5769                                                   | 2533                                              | 844                      |
|               | 5-9   | 0.00027             | 4303                                                   | 1772                                              | 759                      |
|               | 10-14 | 0.00035             | 8037                                                   | 2084                                              | 595                      |

| Departments   | Age   | Mortality rates (R) | Not- overweight population in 2005 (Number of persons) | Overweight population in 2005 (Number of persons) | Obese population in 2005 |
|---------------|-------|---------------------|--------------------------------------------------------|---------------------------------------------------|--------------------------|
|               | 15-19 | 0.00085             | 8508                                                   | 925                                               | 0                        |
|               | 20-24 | 0.00242             | 4371                                                   | 2717                                              | 945                      |
|               | 25-29 | 0.00217             | 4164                                                   | 2379                                              | 595                      |
|               | 30-34 | 0.00243             | 1959                                                   | 3341                                              | 922                      |
|               | 35-39 | 0.00260             | 3076                                                   | 1893                                              | 947                      |
|               | 40-44 | 0.00225             | 1848                                                   | 3080                                              | 2053                     |
|               | 45-49 | 0.00271             | 1286                                                   | 3157                                              | 1169                     |
|               | 50-54 | 0.00425             | 758                                                    | 1625                                              | 1409                     |
|               | 55-59 | 0.00544             | 518                                                    | 1347                                              | 1140                     |
| Department 47 | 0-4   | 0.00367             | 13216                                                  | 3223                                              | 967                      |
|               | 5-9   | 0.00045             | 10597                                                  | 4636                                              | 1987                     |
|               | 10-14 | 0.00036             | 11666                                                  | 1522                                              | 0                        |
|               | 15-19 | 0.00077             | 15955                                                  | 2156                                              | 431                      |
|               | 20-24 | 0.00126             | 13415                                                  | 4174                                              | 1789                     |
|               | 25-29 | 0.00154             | 12677                                                  | 6627                                              | 3169                     |
|               | 30-34 | 0.00157             | 5456                                                   | 4814                                              | 2888                     |
|               | 35-39 | 0.00173             | 8325                                                   | 6838                                              | 1784                     |
|               | 40-44 | 0.00215             | 6212                                                   | 5029                                              | 3550                     |
|               | 45-49 | 0.00280             | 1898                                                   | 6643                                              | 4745                     |
| Department 70 | 0-4   | 0.00295             | 10217                                                  | 1168                                              | 1022                     |
|               | 5-9   | 0.00022             | 7951                                                   | 4185                                              | 418                      |
|               | 10-14 | 0.00029             | 10763                                                  | 1922                                              | 769                      |
|               | 15-19 | 0.00047             | 10706                                                  | 1409                                              | 282                      |
|               | 20-24 | 0.00110             | 8685                                                   | 3316                                              | 316                      |
|               | 25-29 | 0.00139             | 6467                                                   | 3814                                              | 1161                     |
|               | 30-34 | 0.00124             | 3976                                                   | 3365                                              | 765                      |
|               | 35-39 | 0.00178             | 4400                                                   | 4738                                              | 2538                     |
|               | 40-44 | 0.00164             | 3736                                                   | 4448                                              | 2313                     |
|               | 45-49 | 0.00281             | 1308                                                   | 2470                                              | 2906                     |
| Department 88 | 0-4   | 0.00387             | 858                                                    | 3716                                              | 1715                     |
|               | 5-9   | 0.00514             | 2126                                                   | 3340                                              | 1366                     |
|               | 10-14 | 0.00204             | 1053                                                   | 192                                               | 96                       |
|               | 15-19 | 0.00021             | 493                                                    | 740                                               | 123                      |
|               | 20-24 | 0.00040             | 1085                                                   | 241                                               | 0                        |
|               | 25-29 | 0.00084             | 1040                                                   | 462                                               | 116                      |
|               | 30-34 | 0.00207             | 809                                                    | 311                                               | 187                      |
|               | 35-39 | 0.00075             | 637                                                    | 290                                               | 464                      |
|               | 40-44 | 0.00086             | 180                                                    | 721                                               | 481                      |
|               | 45-49 | 0.00190             | 482                                                    | 663                                               | 301                      |
|               | 50-54 | 0.00244             | 477                                                    | 614                                               | 546                      |
|               | 55-59 | 0.00359             | 517                                                    | 804                                               | 172                      |
|               | 50-54 | 0.00436             | 174                                                    | 391                                               | 261                      |
|               | 55-59 | 0.00848             | 291                                                    | 340                                               | 194                      |

<sup>†</sup>Values used in this table are for the urban population

<sup>1</sup> Initial value used in the stock of not-overweight population in 2005 for higher SES.

<sup>2</sup> Initial value used in the stock of overweight population in 2005 for higher SES.

<sup>3</sup> Initial value used in the stock of obese population in 2005 for higher SES.

## 1.2 Oriental region

The Oriental region of Colombia is located in the central eastern part of the national territory and consists of five departments, these are:

- Boyacá (15)
- Cundinamarca (25)
- Meta (50)
- Norte De Santander (54)
- Santander (68)

### 1.2.1 Data and model parameters used

**Table 29. Prevalent rates of entire population by age group, sex, and body mass index category in 2005 (Oriental region)**

| Age Group | Nutritional State Males |           |         | Nutritional State Females |           |         |
|-----------|-------------------------|-----------|---------|---------------------------|-----------|---------|
|           | Not-Overweigh           | Overweigh | Obese   | Not-Overweigh             | Overweigh | Obese   |
| 0-4       | 0.72968                 | 0.19471   | 0.07561 | 0.76311                   | 0.19417   | 0.04272 |
| 5-9       | 0.77491                 | 0.15867   | 0.06642 | 0.83459                   | 0.11654   | 0.04887 |
| 10-14     | 0.80695                 | 0.11969   | 0.07336 | 0.81469                   | 0.16084   | 0.02448 |
| 15-19     | 0.91923                 | 0.06538   | 0.01538 | 0.83235                   | 0.13529   | 0.03235 |
| 20-24     | 0.73981                 | 0.21317   | 0.04702 | 0.72453                   | 0.22830   | 0.04717 |
| 25-29     | 0.58462                 | 0.31923   | 0.09615 | 0.62268                   | 0.29691   | 0.08041 |
| 30-34     | 0.51639                 | 0.36885   | 0.11475 | 0.48182                   | 0.37273   | 0.14545 |
| 35-39     | 0.42424                 | 0.43290   | 0.14286 | 0.47368                   | 0.36000   | 0.16632 |
| 40-44     | 0.42553                 | 0.42553   | 0.14894 | 0.36893                   | 0.37864   | 0.25243 |
| 45-49     | 0.35593                 | 0.45198   | 0.19209 | 0.26221                   | 0.47301   | 0.26478 |
| 50-54     | 0.37805                 | 0.42683   | 0.19512 | 0.27303                   | 0.43421   | 0.29276 |
| 55-59     | 0.39716                 | 0.41135   | 0.19149 | 0.24783                   | 0.44348   | 0.30870 |

**Table 30. Prevalent rates of lower socioeconomic status population by age group, sex, and body mass index category in 2005 (Oriental region)**

| Age Group | Nutritional State Males |           |         | Nutritional State Females |           |         |
|-----------|-------------------------|-----------|---------|---------------------------|-----------|---------|
|           | Not-Overweigh           | Overweigh | Obese   | Not-Overweigh             | Overweigh | Obese   |
| 0-4       | 0.77698                 | 0.17266   | 0.05036 | 0.77344                   | 0.17188   | 0.05469 |
| 5-9       | 0.82456                 | 0.15789   | 0.01754 | 0.91071                   | 0.03571   | 0.05357 |
| 10-14     | 0.90476                 | 0.09524   | 0.00000 | 0.83333                   | 0.14583   | 0.02083 |
| 15-19     | 0.96296                 | 0.01852   | 0.01852 | 0.86885                   | 0.11475   | 0.01639 |
| 20-24     | 0.80392                 | 0.17647   | 0.01961 | 0.68182                   | 0.28409   | 0.03409 |
| 25-29     | 0.78049                 | 0.14634   | 0.07317 | 0.63542                   | 0.27083   | 0.09375 |
| 30-34     | 0.57447                 | 0.40426   | 0.02128 | 0.51429                   | 0.42857   | 0.05714 |

|       |         |         |         |         |         |         |
|-------|---------|---------|---------|---------|---------|---------|
| 35-39 | 0.58974 | 0.38462 | 0.02564 | 0.50000 | 0.35294 | 0.14706 |
| 40-44 | 0.67442 | 0.23256 | 0.09302 | 0.40278 | 0.37500 | 0.22222 |
| 45-49 | 0.60000 | 0.30000 | 0.10000 | 0.28889 | 0.46667 | 0.24444 |
| 50-54 | 0.55556 | 0.27778 | 0.16667 | 0.40909 | 0.34091 | 0.25000 |
| 55-59 | 0.62963 | 0.25926 | 0.11111 | 0.31707 | 0.41463 | 0.26829 |

**Table 31. Prevalent rates of middle socioeconomic status population by age group, sex, and body mass index category in 2005 (Oriental region)**

| Age Group | Nutritional State Males |           |         | Nutritional State Females |           |         |
|-----------|-------------------------|-----------|---------|---------------------------|-----------|---------|
|           | Not-Overweigh           | Overweigh | Obese   | Not-Overweigh             | Overweigh | Obese   |
| 0-4       | 0.72826                 | 0.18478   | 0.08696 | 0.81215                   | 0.17127   | 0.01657 |
| 5-9       | 0.84337                 | 0.09639   | 0.06024 | 0.85897                   | 0.11538   | 0.02564 |
| 10-14     | 0.76667                 | 0.15556   | 0.07778 | 0.90588                   | 0.09412   | 0.00000 |
| 15-19     | 0.90123                 | 0.08642   | 0.01235 | 0.83333                   | 0.11765   | 0.04902 |
| 20-24     | 0.76596                 | 0.22340   | 0.01064 | 0.68047                   | 0.23669   | 0.08284 |
| 25-29     | 0.57143                 | 0.30952   | 0.11905 | 0.62000                   | 0.32667   | 0.05333 |
| 30-34     | 0.53425                 | 0.31507   | 0.15068 | 0.41606                   | 0.40146   | 0.18248 |
| 35-39     | 0.47761                 | 0.38806   | 0.13433 | 0.41830                   | 0.41176   | 0.16993 |
| 40-44     | 0.39189                 | 0.43243   | 0.17568 | 0.39394                   | 0.37374   | 0.23232 |
| 45-49     | 0.38182                 | 0.54545   | 0.07273 | 0.28814                   | 0.39831   | 0.31356 |
| 50-54     | 0.48000                 | 0.38000   | 0.14000 | 0.32051                   | 0.35897   | 0.32051 |
| 55-59     | 0.38462                 | 0.43590   | 0.17949 | 0.33333                   | 0.46032   | 0.20635 |

**Table 32. Prevalent rates of higher socioeconomic status population by age group, sex, and body mass index category in 2005 (Oriental region)**

| Age Group | Nutritional State Males |           |         | Nutritional State Females |           |         |
|-----------|-------------------------|-----------|---------|---------------------------|-----------|---------|
|           | Not-Overweigh           | Overweigh | Obese   | Not-Overweigh             | Overweigh | Obese   |
| 0-4       | 0.69903                 | 0.21845   | 0.08252 | 0.71359                   | 0.22816   | 0.05825 |
| 5-9       | 0.70992                 | 0.19847   | 0.09160 | 0.78788                   | 0.15152   | 0.06061 |
| 10-14     | 0.80315                 | 0.10236   | 0.09449 | 0.75817                   | 0.20261   | 0.03922 |
| 15-19     | 0.91200                 | 0.07200   | 0.01600 | 0.81921                   | 0.15254   | 0.02825 |
| 20-24     | 0.70690                 | 0.21839   | 0.07471 | 0.76557                   | 0.20513   | 0.02930 |
| 25-29     | 0.53333                 | 0.37778   | 0.08889 | 0.61925                   | 0.28870   | 0.09205 |
| 30-34     | 0.48387                 | 0.38710   | 0.12903 | 0.51073                   | 0.33906   | 0.15021 |
| 35-39     | 0.34400                 | 0.47200   | 0.18400 | 0.50000                   | 0.33071   | 0.16929 |
| 40-44     | 0.35593                 | 0.49153   | 0.15254 | 0.34855                   | 0.38174   | 0.26971 |
| 45-49     | 0.29412                 | 0.43137   | 0.27451 | 0.24336                   | 0.51327   | 0.24336 |
| 50-54     | 0.29167                 | 0.47917   | 0.22917 | 0.21978                   | 0.48901   | 0.29121 |
| 55-59     | 0.32000                 | 0.45333   | 0.22667 | 0.18254                   | 0.44444   | 0.37302 |

**Table 33. Prevalent rates of entire population by age group, sex, and body mass index category in 2010 (Oriental region)**

| Age Group | Nutritional State Males |           |         | Nutritional State Females |           |         |
|-----------|-------------------------|-----------|---------|---------------------------|-----------|---------|
|           | Not-Overweigh           | Overweigh | Obese   | Not-Overweigh             | Overweigh | Obese   |
| 0-4       | 0.75081                 | 0.19094   | 0.05825 | 0.79614                   | 0.16164   | 0.04222 |
| 5-9       | 0.75282                 | 0.16027   | 0.08691 | 0.81051                   | 0.14020   | 0.04929 |

|       |         |         |         |         |         |         |
|-------|---------|---------|---------|---------|---------|---------|
| 10-14 | 0.75161 | 0.16022 | 0.08817 | 0.78909 | 0.16579 | 0.04512 |
| 15-19 | 0.83222 | 0.12650 | 0.04128 | 0.78791 | 0.16484 | 0.04725 |
| 20-24 | 0.71358 | 0.21358 | 0.07285 | 0.68146 | 0.23238 | 0.08616 |
| 25-29 | 0.51866 | 0.34774 | 0.13360 | 0.60227 | 0.26278 | 0.13494 |
| 30-34 | 0.45244 | 0.35267 | 0.19490 | 0.47287 | 0.35349 | 0.17364 |
| 35-39 | 0.41534 | 0.40476 | 0.17989 | 0.39840 | 0.40320 | 0.19840 |
| 40-44 | 0.37907 | 0.43488 | 0.18605 | 0.35229 | 0.40284 | 0.24487 |
| 45-49 | 0.34933 | 0.47200 | 0.17867 | 0.30017 | 0.41791 | 0.28192 |
| 50-54 | 0.34074 | 0.45556 | 0.20370 | 0.21649 | 0.43299 | 0.35052 |
| 55-59 | 0.36444 | 0.42222 | 0.21333 | 0.23656 | 0.43548 | 0.32796 |

**Table 34. Prevalent rates of lower socioeconomic status population by age group, sex, and body mass index category in 2010 (Oriental region)**

| Age Group | Nutritional State Males |           |         | Nutritional State Females |           |         |
|-----------|-------------------------|-----------|---------|---------------------------|-----------|---------|
|           | Not-Overweigh           | Overweigh | Obese   | Not-Overweigh             | Overweigh | Obese   |
| 0-4       | 0.78523                 | 0.16779   | 0.04698 | 0.81818                   | 0.14015   | 0.04167 |
| 5-9       | 0.81028                 | 0.13834   | 0.05138 | 0.87405                   | 0.09542   | 0.03053 |
| 10-14     | 0.85366                 | 0.12602   | 0.02033 | 0.86000                   | 0.10800   | 0.03200 |
| 15-19     | 0.91358                 | 0.08025   | 0.00617 | 0.81780                   | 0.13983   | 0.04237 |
| 20-24     | 0.81944                 | 0.11111   | 0.06944 | 0.66489                   | 0.25532   | 0.07979 |
| 25-29     | 0.56552                 | 0.35862   | 0.07586 | 0.59551                   | 0.25281   | 0.15169 |
| 30-34     | 0.57143                 | 0.29524   | 0.13333 | 0.45070                   | 0.35915   | 0.19014 |
| 35-39     | 0.56180                 | 0.33708   | 0.10112 | 0.44262                   | 0.37705   | 0.18033 |
| 40-44     | 0.47222                 | 0.38889   | 0.13889 | 0.40909                   | 0.35606   | 0.23485 |
| 45-49     | 0.53012                 | 0.42169   | 0.04819 | 0.39000                   | 0.35000   | 0.26000 |
| 50-54     | 0.59259                 | 0.37037   | 0.03704 | 0.25882                   | 0.42353   | 0.31765 |
| 55-59     | 0.56098                 | 0.39024   | 0.04878 | 0.30000                   | 0.41667   | 0.28333 |

**Table 35. Prevalent rates of middle socioeconomic status population by age group, sex, and body mass index category in 2010 (Oriental region)**

| Age Group | Nutritional State Males |           |         | Nutritional State Females |           |         |
|-----------|-------------------------|-----------|---------|---------------------------|-----------|---------|
|           | Not-Overweigh           | Overweigh | Obese   | Not-Overweigh             | Overweigh | Obese   |
| 0-4       | 0.74843                 | 0.19497   | 0.05660 | 0.77528                   | 0.19101   | 0.03371 |
| 5-9       | 0.80132                 | 0.12914   | 0.06954 | 0.78041                   | 0.16892   | 0.05068 |
| 10-14     | 0.76923                 | 0.15050   | 0.08027 | 0.77852                   | 0.18456   | 0.03691 |
| 15-19     | 0.82258                 | 0.12903   | 0.04839 | 0.80077                   | 0.14943   | 0.04981 |
| 20-24     | 0.75342                 | 0.19178   | 0.05479 | 0.66288                   | 0.26136   | 0.07576 |
| 25-29     | 0.54545                 | 0.33117   | 0.12338 | 0.61927                   | 0.26606   | 0.11468 |
| 30-34     | 0.46203                 | 0.35443   | 0.18354 | 0.53589                   | 0.31579   | 0.14833 |
| 35-39     | 0.39716                 | 0.43972   | 0.16312 | 0.39524                   | 0.35238   | 0.25238 |
| 40-44     | 0.46400                 | 0.36000   | 0.17600 | 0.37173                   | 0.40314   | 0.22513 |
| 45-49     | 0.32759                 | 0.52586   | 0.14655 | 0.30952                   | 0.39524   | 0.29524 |
| 50-54     | 0.33333                 | 0.44444   | 0.22222 | 0.19084                   | 0.39695   | 0.41221 |
| 55-59     | 0.30357                 | 0.50000   | 0.19643 | 0.26667                   | 0.40000   | 0.33333 |

**Table 36. Prevalent rates of higher socioeconomic status population by age group, sex, and body mass index category in 2010 (Oriental region)**



| Age Group | Nutritional State Males |           |         | Nutritional State Females |           |         |
|-----------|-------------------------|-----------|---------|---------------------------|-----------|---------|
|           | Not-Overweigh           | Overweigh | Obese   | Not-Overweigh             | Overweigh | Obese   |
| 0-4       | 0.72026                 | 0.20900   | 0.07074 | 0.79530                   | 0.15436   | 0.05034 |
| 5-9       | 0.66465                 | 0.20544   | 0.12991 | 0.78873                   | 0.14930   | 0.06197 |
| 10-14     | 0.67273                 | 0.18961   | 0.13766 | 0.75309                   | 0.18765   | 0.05926 |
| 15-19     | 0.80059                 | 0.14663   | 0.05279 | 0.76271                   | 0.18886   | 0.04843 |
| 20-24     | 0.61411                 | 0.29461   | 0.09129 | 0.70701                   | 0.19427   | 0.09873 |
| 25-29     | 0.46667                 | 0.35238   | 0.18095 | 0.59416                   | 0.26623   | 0.13961 |
| 30-34     | 0.36905                 | 0.38690   | 0.24405 | 0.43878                   | 0.37755   | 0.18367 |
| 35-39     | 0.34459                 | 0.41216   | 0.24324 | 0.38225                   | 0.45051   | 0.16724 |
| 40-44     | 0.30472                 | 0.48927   | 0.20601 | 0.31613                   | 0.42258   | 0.26129 |
| 45-49     | 0.27841                 | 0.46023   | 0.26136 | 0.26280                   | 0.45734   | 0.27986 |
| 50-54     | 0.25000                 | 0.49306   | 0.25694 | 0.21561                   | 0.45353   | 0.33086 |
| 55-59     | 0.32813                 | 0.39844   | 0.27344 | 0.20290                   | 0.45894   | 0.33816 |

**Table 37. Fraction of births for men by body mass index category and socioeconomic status (Oriental region)<sup>†</sup>**

| Population group | Lower SES (%/year) | Middle SES (%/year) | Higher SES (%/year) | Complete Urban Population (%/year) |
|------------------|--------------------|---------------------|---------------------|------------------------------------|
| Not- overweight  | 84,62%             | 76,92%              | 72,22%              | 77,23%                             |
| Overweight       | 7,69%              | 7,69%               | 22,22%              | 12,87%                             |
| Obese            | 7,69%              | 15,38%              | 5,56%               | 9,90%                              |

<sup>†</sup> The fractions of births by each BMI category correspond to the prevalences by BMI category of children aged 0 to 12 months

**Table 38. Fraction of births for women by body mass index category and socioeconomic status (Oriental region)<sup>†</sup>**

| Population group | Lower SES (%/year) | Middle SES (%/year) | Higher SES (%/year) | Complete Urban Population (%/year) |
|------------------|--------------------|---------------------|---------------------|------------------------------------|
| Not- overweight  | 83,33%             | 84,85%              | 69,44%              | 78,49%                             |
| Overweight       | 8,33%              | 15,15%              | 27,78%              | 18,28%                             |
| Obese            | 8,33%              | 0,00%               | 2,78%               | 3,23%                              |

<sup>†</sup> The fractions of births by each BMI category correspond to the prevalences by BMI category of children aged 0 to 12 months

**Table 39. Mortality rates for men and population size by age group without segregate by socioeconomic status (Oriental region)<sup>†</sup>**

| Age group | Mortality rates (R) (%/year) | Not- overweight men in 2005 (Number of people) <sup>1</sup> | Overweight men in 2005 (Number of people) <sup>2</sup> | Obese men in 2005 (Number of people) <sup>3</sup> |
|-----------|------------------------------|-------------------------------------------------------------|--------------------------------------------------------|---------------------------------------------------|
| 0-4       | 0,00339                      | 176247                                                      | 47030                                                  | 18264                                             |
| 5-9       | 0,00029                      | 197520                                                      | 40445                                                  | 16930                                             |
| 10-14     | 0,00035                      | 210874                                                      | 31278                                                  | 19170                                             |
| 15-19     | 0,00119                      | 228039                                                      | 16220                                                  | 3817                                              |
| 20-24     | 0,00239                      | 159170                                                      | 45862                                                  | 10117                                             |
| 25-29     | 0,00273                      | 111185                                                      | 60713                                                  | 18287                                             |
| 30-34     | 0,00293                      | 86676                                                       | 61911                                                  | 19261                                             |
| 35-39     | 0,00283                      | 71920                                                       | 73388                                                  | 24218                                             |

|       |         |       |       |       |
|-------|---------|-------|-------|-------|
| 40-44 | 0,00288 | 68349 | 68349 | 23922 |
| 45-49 | 0,00380 | 46710 | 59314 | 25209 |
| 50-54 | 0,00630 | 39542 | 44644 | 20409 |
| 55-59 | 0,00831 | 32484 | 33644 | 15662 |

†Values used in this table are for the urban population

<sup>1</sup> Initial value used in the stock of not-overweight population in 2005.

<sup>2</sup> Initial value used in the stock of overweight population in 2005.

<sup>3</sup> Initial value used in the stock of obese population in 2005.

**Table 40. Mortality rates for women and population size by age group without segregate by socioeconomic status (Oriental region)†**

| Age group | Mortality rates (R) (%/year) | Not- overweight men in 2005 (Number of people) <sup>1</sup> | Overweight men in 2005 (Number of people) <sup>2</sup> | Obese men in 2005 (Number of people) <sup>3</sup> |
|-----------|------------------------------|-------------------------------------------------------------|--------------------------------------------------------|---------------------------------------------------|
| 0-4       | 0,00279                      | 177602                                                      | 45191                                                  | 9942                                              |
| 5-9       | 0,00025                      | 206793                                                      | 28877                                                  | 12110                                             |
| 10-14     | 0,00022                      | 208082                                                      | 41081                                                  | 6251                                              |
| 15-19     | 0,00048                      | 209006                                                      | 33973                                                  | 8124                                              |
| 20-24     | 0,00057                      | 164005                                                      | 51679                                                  | 10677                                             |
| 25-29     | 0,00062                      | 127221                                                      | 60662                                                  | 16429                                             |
| 30-34     | 0,00074                      | 90686                                                       | 70153                                                  | 27377                                             |
| 35-39     | 0,00093                      | 92379                                                       | 70208                                                  | 32435                                             |
| 40-44     | 0,00157                      | 67232                                                       | 69001                                                  | 46001                                             |
| 45-49     | 0,00211                      | 39405                                                       | 71084                                                  | 39791                                             |
| 50-54     | 0,00362                      | 32546                                                       | 51761                                                  | 34899                                             |
| 55-59     | 0,00537                      | 23408                                                       | 41889                                                  | 29158                                             |

†Values used in this table are for the urban population

<sup>1</sup> Initial value used in the stock of not-overweight population in 2005.

<sup>2</sup> Initial value used in the stock of overweight population in 2005.

<sup>3</sup> Initial value used in the stock of obese population in 2005.

**Table 41. Man mortality rates and population size by age group for the lower socioeconomic status population (Oriental region) †**

| Age group | Mortality rates (R) (%/year) | Not- overweight men in 2005 (Number of people) <sup>1</sup> | Overweight men in 2005 (Number of people) <sup>2</sup> | Obese men in 2005 (Number of people) <sup>3</sup> |
|-----------|------------------------------|-------------------------------------------------------------|--------------------------------------------------------|---------------------------------------------------|
| 0-4       | 0,00339                      | 49313                                                       | 10958                                                  | 3196                                              |
| 5-9       | 0,00029                      | 44207                                                       | 8465                                                   | 941                                               |
| 10-14     | 0,00035                      | 38341                                                       | 4036                                                   | 0                                                 |
| 15-19     | 0,00119                      | 49615                                                       | 954                                                    | 954                                               |
| 20-24     | 0,00239                      | 27652                                                       | 6070                                                   | 674                                               |
| 25-29     | 0,00273                      | 23407                                                       | 4389                                                   | 2194                                              |
| 30-34     | 0,00293                      | 18573                                                       | 13070                                                  | 688                                               |
| 35-39     | 0,00283                      | 16879                                                       | 11008                                                  | 734                                               |
| 40-44     | 0,00288                      | 19821                                                       | 6835                                                   | 2734                                              |
| 45-49     | 0,00380                      | 8897                                                        | 4449                                                   | 1483                                              |
| 50-54     | 0,00630                      | 6378                                                        | 3189                                                   | 1913                                              |
| 55-59     | 0,00831                      | 9861                                                        | 4060                                                   | 1740                                              |

†Values used in this table are for the urban population

<sup>1</sup> Initial value used in the stock of not-overweight population in 2005 for lower SES.

<sup>2</sup> Initial value used in the stock of overweight population in 2005 for lower SES.

<sup>3</sup> Initial value used in the stock of obese population in 2005 for lower SES.

**Table 42. Women mortality rates and population size by age group for the lower socioeconomic status population (Oriental region) †**

| Age group | Mortality rates (R) (%/year) | Not- overweight women in 2005 (Number of people) <sup>1</sup> | Overweight women in 2005 (Number of people) <sup>2</sup> | Obese women in 2005 (Number of people) <sup>3</sup> |
|-----------|------------------------------|---------------------------------------------------------------|----------------------------------------------------------|-----------------------------------------------------|
| 0-4       | 0,00279                      | 44740                                                         | 9942                                                     | 3163                                                |
| 5-9       | 0,00025                      | 47506                                                         | 1863                                                     | 2794                                                |
| 10-14     | 0,00022                      | 35722                                                         | 6251                                                     | 893                                                 |
| 15-19     | 0,00048                      | 39143                                                         | 5170                                                     | 739                                                 |
| 20-24     | 0,00057                      | 25626                                                         | 10677                                                    | 1281                                                |
| 25-29     | 0,00062                      | 25697                                                         | 10953                                                    | 3791                                                |
| 30-34     | 0,00074                      | 15399                                                         | 12833                                                    | 1711                                                |
| 35-39     | 0,00093                      | 13959                                                         | 9854                                                     | 4106                                                |
| 40-44     | 0,00157                      | 12827                                                         | 11943                                                    | 7077                                                |
| 45-49     | 0,00211                      | 5022                                                          | 8113                                                     | 4250                                                |
| 50-54     | 0,00362                      | 7058                                                          | 5882                                                     | 4313                                                |
| 55-59     | 0,00537                      | 5339                                                          | 6981                                                     | 4517                                                |

†Values used in this table are for the urban population

<sup>1</sup> Initial value used in the stock of not-overweight population in 2005 for lower SES.

<sup>2</sup> Initial value used in the stock of overweight population in 2005 for lower SES.

<sup>3</sup> Initial value used in the stock of obese population in 2005 for lower SES.

**Table 43. Man mortality rates and population size by age group for the middle socioeconomic status population (Oriental region) †**

| Age group | Mortality rates (R) (%/year) | Not- overweight men in 2005 (Number of people) <sup>1</sup> | Overweight men in 2005 (Number of people) <sup>2</sup> | Obese men in 2005 (Number of people) <sup>3</sup> |
|-----------|------------------------------|-------------------------------------------------------------|--------------------------------------------------------|---------------------------------------------------|
| 0-4       | 0,00339                      | 61184                                                       | 15524                                                  | 7306                                              |
| 5-9       | 0,00029                      | 65840                                                       | 7525                                                   | 4703                                              |
| 10-14     | 0,00035                      | 69619                                                       | 14126                                                  | 7063                                              |
| 15-19     | 0,00119                      | 69652                                                       | 6679                                                   | 954                                               |
| 20-24     | 0,00239                      | 48560                                                       | 14163                                                  | 674                                               |
| 25-29     | 0,00273                      | 35111                                                       | 19019                                                  | 7315                                              |
| 30-34     | 0,00293                      | 26828                                                       | 15822                                                  | 7567                                              |
| 35-39     | 0,00283                      | 23484                                                       | 19081                                                  | 6605                                              |
| 40-44     | 0,00288                      | 19821                                                       | 21872                                                  | 8885                                              |
| 45-49     | 0,00380                      | 15570                                                       | 22243                                                  | 2966                                              |
| 50-54     | 0,00630                      | 15307                                                       | 12118                                                  | 4464                                              |
| 55-59     | 0,00831                      | 8701                                                        | 9861                                                   | 4060                                              |

†Values used in this table are for the urban population

<sup>1</sup> Initial value used in the stock of not-overweight population in 2005 for middle SES.

<sup>2</sup> Initial value used in the stock of overweight population in 2005 for middle SES.

<sup>3</sup> Initial value used in the stock of obese population in 2005 for middle SES.

**Table 44. Women mortality rates and population size by age group for the middle socioeconomic status population (Oriental region) †**

| Age group | Mortality rates (R) (%/year) | Not- overweight women in 2005 (Number of people) <sup>1</sup> | Overweight women in 2005 (Number of people) <sup>2</sup> | Obese women in 2005 (Number of people) <sup>3</sup> |
|-----------|------------------------------|---------------------------------------------------------------|----------------------------------------------------------|-----------------------------------------------------|
| 0-4       | 0,00279                      | 66431                                                         | 14009                                                    | 1356                                                |
| 5-9       | 0,00025                      | 62410                                                         | 8383                                                     | 1863                                                |
| 10-14     | 0,00022                      | 68765                                                         | 7144                                                     | 0                                                   |
| 15-19     | 0,00048                      | 62776                                                         | 8862                                                     | 3693                                                |
| 20-24     | 0,00057                      | 49116                                                         | 17084                                                    | 5979                                                |

|       |         |       |       |       |
|-------|---------|-------|-------|-------|
| 25-29 | 0,00062 | 39177 | 20642 | 3370  |
| 30-34 | 0,00074 | 24383 | 23527 | 10694 |
| 35-39 | 0,00093 | 26277 | 25866 | 10675 |
| 40-44 | 0,00157 | 17250 | 16366 | 10173 |
| 45-49 | 0,00211 | 13135 | 18157 | 14294 |
| 50-54 | 0,00362 | 9803  | 10980 | 9803  |
| 55-59 | 0,00537 | 8624  | 11910 | 5339  |

†Values used in this table are for the urban population

1 Initial value used in the stock of not-overweight population in 2005 for middle SES.

2 Initial value used in the stock of overweight population in 2005 for middle SES.

3 Initial value used in the stock of obese population in 2005 for middle SES.

**Table 45. Man mortality rates and population size by age group for the higher socioeconomic status population (Oriental region) †**

| Age group | Mortality rates (R) (%/year) | Not- overweight men in 2005 (Number of people) <sup>1</sup> | Overweight men in 2005 (Number of people) <sup>2</sup> | Obese men in 2005 (Number of people) <sup>3</sup> |
|-----------|------------------------------|-------------------------------------------------------------|--------------------------------------------------------|---------------------------------------------------|
| 0-4       | 0,00339                      | 65750                                                       | 20547                                                  | 7762                                              |
| 5-9       | 0,00029                      | 87473                                                       | 24455                                                  | 11287                                             |
| 10-14     | 0,00035                      | 102914                                                      | 13117                                                  | 12108                                             |
| 15-19     | 0,00119                      | 108772                                                      | 8587                                                   | 1908                                              |
| 20-24     | 0,00239                      | 82957                                                       | 25629                                                  | 8768                                              |
| 25-29     | 0,00273                      | 52667                                                       | 37306                                                  | 8778                                              |
| 30-34     | 0,00293                      | 41274                                                       | 33019                                                  | 11006                                             |
| 35-39     | 0,00283                      | 31557                                                       | 43299                                                  | 16879                                             |
| 40-44     | 0,00288                      | 28707                                                       | 39642                                                  | 12303                                             |
| 45-49     | 0,00380                      | 22243                                                       | 32623                                                  | 20760                                             |
| 50-54     | 0,00630                      | 17858                                                       | 29338                                                  | 14031                                             |
| 55-59     | 0,00831                      | 13922                                                       | 19722                                                  | 9861                                              |

†Values used in this table are for the urban population

<sup>1</sup> Initial value used in the stock of not-overweight population in 2005 for higher SES.

<sup>2</sup> Initial value used in the stock of overweight population in 2005 for higher SES.

<sup>3</sup> Initial value used in the stock of obese population in 2005 for higher SES.

**Table 46. Women mortality rates and population size by age group for the higher socioeconomic status population (Oriental region) †**

| Age group | Mortality rates (R) (%/year) | Not- overweight women in 2005 (Number of people) <sup>1</sup> | Overweight women in 2005 (Number of people) <sup>2</sup> | Obese women in 2005 (Number of people) <sup>3</sup> |
|-----------|------------------------------|---------------------------------------------------------------|----------------------------------------------------------|-----------------------------------------------------|
| 0-4       | 0,00279                      | 66431                                                         | 21240                                                    | 5423                                                |
| 5-9       | 0,00025                      | 96876                                                         | 18630                                                    | 7452                                                |
| 10-14     | 0,00022                      | 103594                                                        | 27685                                                    | 5358                                                |
| 15-19     | 0,00048                      | 107088                                                        | 19941                                                    | 3693                                                |
| 20-24     | 0,00057                      | 89263                                                         | 23917                                                    | 3417                                                |
| 25-29     | 0,00062                      | 62347                                                         | 29067                                                    | 9268                                                |
| 30-34     | 0,00074                      | 50904                                                         | 33793                                                    | 14972                                               |
| 35-39     | 0,00093                      | 52143                                                         | 34488                                                    | 17655                                               |
| 40-44     | 0,00157                      | 37155                                                         | 40693                                                    | 28751                                               |
| 45-49     | 0,00211                      | 21248                                                         | 44814                                                    | 21248                                               |
| 50-54     | 0,00362                      | 15685                                                         | 34899                                                    | 20783                                               |
| 55-59     | 0,00537                      | 9445                                                          | 22998                                                    | 19302                                               |

†Values used in this table are for the urban population

<sup>1</sup> Initial value used in the stock of not-overweight population in 2005 for higher SES.

<sup>2</sup> Initial value used in the stock of overweight population in 2005 for higher SES.

<sup>3</sup> Initial value used in the stock of obese population in 2005 for higher SES.

**Table 47. Data and projections of the Fertility rates by department and Region (Oriental region)<sup>†</sup>**

| Year | Fecundity Rate Dept 15 | Fecundity Rate Depto 25 | Fecundity Rate Depto 50 | Fecundity Rate Depto 54 | Fecundity Rate Depto 68 | Region Average Fecundity Rate |
|------|------------------------|-------------------------|-------------------------|-------------------------|-------------------------|-------------------------------|
| 2005 | 2,8421                 | 2,6459                  | 2,7668                  | 2,7249                  | 2,2912                  | 1,659                         |
| 2006 | 2,7964                 | 2,5891                  | 2,7232                  | 2,6726                  | 2,2568                  | 1,630                         |
| 2007 | 2,7507                 | 2,5323                  | 2,6796                  | 2,6203                  | 2,2224                  | 1,601                         |
| 2008 | 2,705                  | 2,4755                  | 2,636                   | 2,568                   | 2,188                   | 1,572                         |
| 2009 | 2,6708                 | 2,4432                  | 2,6051                  | 2,5373                  | 2,172                   | 1,554                         |
| 2010 | 2,6366                 | 2,4109                  | 2,5742                  | 2,5066                  | 2,156                   | 1,536                         |
| 2011 | 2,6024                 | 2,3786                  | 2,5433                  | 2,4759                  | 2,14                    | 1,518                         |
| 2012 | 2,5682                 | 2,3463                  | 2,5124                  | 2,4452                  | 2,124                   | 1,500                         |
| 2013 | 2,534                  | 2,314                   | 2,4815                  | 2,4145                  | 2,108                   | 1,482                         |
| 2014 | 2,514                  | 2,2986                  | 2,4623                  | 2,3983                  | 2,1014                  | 1,472                         |
| 2015 | 2,494                  | 2,2832                  | 2,4431                  | 2,3821                  | 2,0948                  | 1,462                         |
| 2016 | 2,474                  | 2,2678                  | 2,4239                  | 2,3659                  | 2,0882                  | 1,452                         |
| 2017 | 2,454                  | 2,2524                  | 2,4047                  | 2,3497                  | 2,0816                  | 1,443                         |
| 2018 | 2,434                  | 2,237                   | 2,3855                  | 2,3335                  | 2,075                   | 1,433                         |
| 2019 | 2,414                  | 2,2216                  | 2,3663                  | 2,3173                  | 2,0684                  | 1,423                         |
| 2020 | 2,394                  | 2,2062                  | 2,3471                  | 2,3011                  | 2,0618                  | 1,414                         |
| 2021 | 2,374                  | 2,1908                  | 2,3279                  | 2,2849                  | 2,0552                  | 1,404                         |
| 2022 | 2,354                  | 2,1754                  | 2,3087                  | 2,2687                  | 2,0486                  | 1,394                         |
| 2023 | 2,334                  | 2,16                    | 2,2895                  | 2,2525                  | 2,042                   | 1,385                         |
| 2024 | 2,314                  | 2,1446                  | 2,2703                  | 2,2363                  | 2,0354                  | 1,375                         |
| 2025 | 2,294                  | 2,1292                  | 2,2511                  | 2,2201                  | 2,0288                  | 1,365                         |
| 2026 | 2,274                  | 2,1138                  | 2,2319                  | 2,2039                  | 2,0222                  | 1,356                         |
| 2027 | 2,254                  | 2,0984                  | 2,2127                  | 2,1877                  | 2,0156                  | 1,346                         |
| 2028 | 2,234                  | 2,083                   | 2,1935                  | 2,1715                  | 2,009                   | 1,336                         |
| 2029 | 2,214                  | 2,0676                  | 2,1743                  | 2,1553                  | 2,0024                  | 1,327                         |
| 2030 | 2,194                  | 2,0522                  | 2,1551                  | 2,1391                  | 1,9958                  | 1,317                         |

<sup>†</sup> Data of Fertility rate of DANE [1] was used to forecast the department's fertility rate from 2005 to 2030. Holt-Winters no seasonal method in EViews 5 (Quantitative Micro Software, LLC) was used to forecast the fertility rate. In the SD model we used data from 2005 to 2030 and the region fertility rate was calculated as the average of all departments' fertility rates.

**Table 48. Fraction of births by departments, body mass index category, and socioeconomic status (Oriental region)<sup>†</sup>**

| Population group |                | Lower SES (%/year) | Middle SES (%/year) | Higher SES (%/year) | Complete Urban Population (%/year) |
|------------------|----------------|--------------------|---------------------|---------------------|------------------------------------|
| Department 15    | Not-overweight | 80,00%             | 71,43%              | 77,78%              | 76,92%                             |
|                  | Overweight     | 0,00%              | 14,29%              | 11,11%              | 7,69%                              |
|                  | Obese          | 20,00%             | 14,29%              | 11,11%              | 15,38%                             |
| Department 25    | Not-overweight | 71,43%             | 66,67%              | 57,14%              | 63,33%                             |
|                  | Overweight     | 28,57%             | 33,33%              | 28,57%              | 30,00%                             |
|                  | Obese          | 0,00%              | 0,00%               | 14,29%              | 6,67%                              |
| Department 50    | Not-overweight | 93,33%             | 83,33%              | 65,00%              | 79,25%                             |
|                  | Overweight     | 6,67%              | 5,56%               | 30,00%              | 15,09%                             |
|                  | Obese          | 0,00%              | 11,11%              | 5,00%               | 5,66%                              |
| Department 54    | Not-overweight | 76,47%             | 88,89%              | 77,78%              | 82,26%                             |
|                  | Overweight     | 17,65%             | 3,70%               | 22,22%              | 12,90%                             |
|                  | Obese          | 5,88%              | 7,41%               | 0,00%               | 4,84%                              |
| Department 68    | Not-overweight | 82,14%             | 73,68%              | 72,50%              | 76,87%                             |
|                  | Overweight     | 16,07%             | 18,42%              | 25,00%              | 19,40%                             |
|                  | Obese          | 1,79%              | 7,89%               | 2,50%               | 3,73%                              |

† The fractions of births by each BMI category correspond to the prevalences by BMI category of children aged 0 to 12 months

**Table 49. Prevalent rates of entire population by age group, and body mass index category (Oriental region)**

| Departments   | Age group | Not- overweight in 2005 | Overweight in 2005 | Obese in 2005 | Not- overweight in 2010 | Overweight in 2010 | Obese in 2010 |
|---------------|-----------|-------------------------|--------------------|---------------|-------------------------|--------------------|---------------|
| Department 15 | 0-4       | 0.76978                 | 0.13669            | 0.09353       | 0.69362                 | 0.23404            | 0.07234       |
|               | 5-9       | 0.80000                 | 0.20000            | 0.00000       | 0.80000                 | 0.15094            | 0.04906       |
|               | 10-14     | 0.82667                 | 0.13333            | 0.04000       | 0.78623                 | 0.17391            | 0.03986       |
|               | 15-19     | 0.86842                 | 0.10526            | 0.02632       | 0.82533                 | 0.14410            | 0.03057       |
|               | 20-24     | 0.80000                 | 0.16471            | 0.03529       | 0.70000                 | 0.24706            | 0.05294       |
|               | 25-29     | 0.70238                 | 0.23810            | 0.05952       | 0.60759                 | 0.29114            | 0.10127       |
|               | 30-34     | 0.47436                 | 0.42308            | 0.10256       | 0.46099                 | 0.32624            | 0.21277       |
|               | 35-39     | 0.47297                 | 0.40541            | 0.12162       | 0.45255                 | 0.36496            | 0.18248       |
|               | 40-44     | 0.38889                 | 0.41667            | 0.19444       | 0.33333                 | 0.42963            | 0.23704       |
|               | 45-49     | 0.26667                 | 0.41667            | 0.31667       | 0.32283                 | 0.45669            | 0.22047       |
|               | 50-54     | 0.20000                 | 0.52000            | 0.28000       | 0.18349                 | 0.53211            | 0.28440       |
| 55-59         | 0.20755   | 0.50943                 | 0.28302            | 0.16438       | 0.53425                 | 0.30137            |               |
| Department 25 | 0-4       | 0.73295                 | 0.20455            | 0.06250       | 0.70070                 | 0.25000            | 0.04930       |
|               | 5-9       | 0.75556                 | 0.15556            | 0.08889       | 0.74257                 | 0.20792            | 0.04950       |
|               | 10-14     | 0.75862                 | 0.18391            | 0.05747       | 0.81056                 | 0.14907            | 0.04037       |
|               | 15-19     | 0.86585                 | 0.12195            | 0.01220       | 0.83883                 | 0.12454            | 0.03663       |
|               | 20-24     | 0.67939                 | 0.27481            | 0.04580       | 0.72381                 | 0.20476            | 0.07143       |
|               | 25-29     | 0.53175                 | 0.36508            | 0.10317       | 0.59694                 | 0.30102            | 0.10204       |
|               | 30-34     | 0.53659                 | 0.30894            | 0.15447       | 0.49045                 | 0.33758            | 0.17197       |
|               | 35-39     | 0.43119                 | 0.34862            | 0.22018       | 0.36054                 | 0.43537            | 0.20408       |

| Departments   | Age group     | Not- overweight in 2005 | Overweight in 2005 | Obese in 2005 | Not- overweight in 2010 | Overweight in 2010 | Obese in 2010 |
|---------------|---------------|-------------------------|--------------------|---------------|-------------------------|--------------------|---------------|
|               | 40-44         | 0.37037                 | 0.33333            | 0.29630       | 0.34091                 | 0.45455            | 0.20455       |
|               | 45-49         | 0.25581                 | 0.51163            | 0.23256       | 0.28571                 | 0.46429            | 0.25000       |
|               | 50-54         | 0.23881                 | 0.47761            | 0.28358       | 0.21014                 | 0.49275            | 0.29710       |
|               | 55-59         | 0.30303                 | 0.43939            | 0.25758       | 0.23750                 | 0.42500            | 0.33750       |
| Department 50 | 0-4           | 0.74545                 | 0.18636            | 0.06818       | 0.77429                 | 0.16286            | 0.06286       |
|               | 5-9           | 0.79661                 | 0.14407            | 0.05932       | 0.78981                 | 0.13694            | 0.07325       |
|               | 10-14         | 0.84167                 | 0.11667            | 0.04167       | 0.70056                 | 0.22034            | 0.07910       |
|               | 15-19         | 0.88618                 | 0.09756            | 0.01626       | 0.80634                 | 0.15845            | 0.03521       |
|               | 20-24         | 0.71508                 | 0.21788            | 0.06704       | 0.62295                 | 0.25000            | 0.12705       |
|               | 25-29         | 0.59649                 | 0.30994            | 0.09357       | 0.56915                 | 0.25532            | 0.17553       |
|               | 30-34         | 0.48092                 | 0.41985            | 0.09924       | 0.44920                 | 0.37433            | 0.17647       |
|               | 35-39         | 0.47059                 | 0.37908            | 0.15033       | 0.39785                 | 0.41935            | 0.18280       |
|               | 40-44         | 0.37302                 | 0.34127            | 0.28571       | 0.31844                 | 0.39106            | 0.29050       |
|               | 45-49         | 0.29167                 | 0.45833            | 0.25000       | 0.31875                 | 0.46250            | 0.21875       |
|               | 50-54         | 0.31532                 | 0.37838            | 0.30631       | 0.29245                 | 0.33962            | 0.36792       |
|               | 55-59         | 0.27632                 | 0.46053            | 0.26316       | 0.29412                 | 0.47059            | 0.23529       |
|               | Department 54 | 0-4                     | 0.72789            | 0.23129       | 0.04082                 | 0.82582            | 0.12090       |
| 5-9           |               | 0.86093                 | 0.06623            | 0.07285       | 0.81076                 | 0.12749            | 0.06175       |
| 10-14         |               | 0.87692                 | 0.09231            | 0.03077       | 0.79412                 | 0.12395            | 0.08193       |
| 15-19         |               | 0.85714                 | 0.11310            | 0.02976       | 0.80420                 | 0.15152            | 0.04429       |
| 20-24         |               | 0.71595                 | 0.23735            | 0.04669       | 0.69333                 | 0.22400            | 0.08267       |
| 25-29         |               | 0.62687                 | 0.28358            | 0.08955       | 0.57423                 | 0.28571            | 0.14006       |
| 30-34         |               | 0.52198                 | 0.34615            | 0.13187       | 0.46926                 | 0.31715            | 0.21359       |
| 35-39         |               | 0.44059                 | 0.43069            | 0.12871       | 0.40418                 | 0.39024            | 0.20557       |
| 40-44         |               | 0.42857                 | 0.40373            | 0.16770       | 0.42529                 | 0.39847            | 0.17625       |
| 45-49         |               | 0.29630                 | 0.47531            | 0.22840       | 0.35000                 | 0.41923            | 0.23077       |
| 50-54         |               | 0.35200                 | 0.38400            | 0.26400       | 0.31156                 | 0.43719            | 0.25126       |
| 55-59         |               | 0.40566                 | 0.33019            | 0.26415       | 0.30000                 | 0.44118            | 0.25882       |
| Department 68 |               | 0-4                     | 0.76744            | 0.18140       | 0.05116                 | 0.80201            | 0.17293       |
|               | 5-9           | 0.77670                 | 0.17476            | 0.04854       | 0.75904                 | 0.14458            | 0.09639       |
|               | 10-14         | 0.74436                 | 0.18797            | 0.06767       | 0.76264                 | 0.16264            | 0.07473       |
|               | 15-19         | 0.87417                 | 0.09272            | 0.03311       | 0.72414                 | 0.19540            | 0.08046       |
|               | 20-24         | 0.76650                 | 0.19797            | 0.03553       | 0.72776                 | 0.20755            | 0.06469       |
|               | 25-29         | 0.61350                 | 0.31288            | 0.07362       | 0.51911                 | 0.34076            | 0.14013       |
|               | 30-34         | 0.45294                 | 0.38235            | 0.16471       | 0.45745                 | 0.40071            | 0.14184       |
|               | 35-39         | 0.47619                 | 0.34524            | 0.17857       | 0.41057                 | 0.41057            | 0.17886       |
|               | 40-44         | 0.37778                 | 0.45556            | 0.16667       | 0.36218                 | 0.41667            | 0.22115       |
|               | 45-49         | 0.31884                 | 0.45652            | 0.22464       | 0.30798                 | 0.41825            | 0.27376       |
|               | 50-54         | 0.34783                 | 0.46957            | 0.18261       | 0.27094                 | 0.41379            | 0.31527       |
|               | 55-59         | 0.25714                 | 0.48571            | 0.25714       | 0.33333                 | 0.36508            | 0.30159       |

**Table 50. Prevalent rates of lower socioeconomic status population by age group, and body mass index category (Oriental region)**

| Departments   | Age group | Not- overweight in 2005 | Overweight in 2005 | Obese in 2005 | Not- overweight in 2010 | Overweight in 2010 | Obese in 2010 |
|---------------|-----------|-------------------------|--------------------|---------------|-------------------------|--------------------|---------------|
| Department 15 | 0-4       | 0.74468                 | 0.12766            | 0.12766       | 0.69697                 | 0.21212            | 0.09091       |
|               | 5-9       | 0.77778                 | 0.22222            | 0.00000       | 0.84444                 | 0.13333            | 0.02222       |
|               | 10-14     | 0.83333                 | 0.16667            | 0.00000       | 0.77778                 | 0.20000            | 0.02222       |
|               | 15-19     | 0.80000                 | 0.13333            | 0.06667       | 0.84615                 | 0.12821            | 0.02564       |
|               | 20-24     | 0.72222                 | 0.22222            | 0.05556       | 0.66667                 | 0.29630            | 0.03704       |
|               | 25-29     | 0.76471                 | 0.17647            | 0.05882       | 0.58824                 | 0.23529            | 0.17647       |
|               | 30-34     | 0.55556                 | 0.44444            | 0.00000       | 0.33333                 | 0.33333            | 0.33333       |
|               | 35-39     | 0.45455                 | 0.45455            | 0.09091       | 0.56522                 | 0.21739            | 0.21739       |
|               | 40-44     | 0.44444                 | 0.38889            | 0.16667       | 0.40000                 | 0.40000            | 0.20000       |
|               | 45-49     | 0.12500                 | 0.37500            | 0.50000       | 0.52941                 | 0.41176            | 0.05882       |
|               | 50-54     | 0.60000                 | 0.20000            | 0.20000       | 0.11111                 | 0.44444            | 0.44444       |
| 55-59         | 0.08333   | 0.66667                 | 0.25000            | 0.33333       | 0.33333                 | 0.33333            |               |
| Department 25 | 0-4       | 0.75000                 | 0.20000            | 0.05000       | 0.71642                 | 0.23881            | 0.04478       |
|               | 5-9       | 0.87500                 | 0.12500            | 0.00000       | 0.75000                 | 0.18750            | 0.06250       |
|               | 10-14     | 0.86667                 | 0.13333            | 0.00000       | 0.89091                 | 0.09091            | 0.01818       |
|               | 15-19     | 0.66667                 | 0.00000            | 0.33333       | 0.81818                 | 0.12121            | 0.06061       |
|               | 20-24     | 0.70588                 | 0.23529            | 0.05882       | 0.90909                 | 0.06061            | 0.03030       |
|               | 25-29     | 0.43478                 | 0.39130            | 0.17391       | 0.54545                 | 0.36364            | 0.09091       |
|               | 30-34     | 0.50000                 | 0.37500            | 0.12500       | 0.62963                 | 0.25926            | 0.11111       |
|               | 35-39     | 0.41176                 | 0.41176            | 0.17647       | 0.30000                 | 0.50000            | 0.20000       |
|               | 40-44     | 0.47059                 | 0.35294            | 0.17647       | 0.64706                 | 0.05882            | 0.29412       |
|               | 45-49     | 0.22222                 | 0.55556            | 0.22222       | 0.38889                 | 0.27778            | 0.33333       |
|               | 50-54     | 0.16667                 | 0.50000            | 0.33333       | 0.40000                 | 0.35000            | 0.25000       |
| 55-59         | 0.28571   | 0.28571                 | 0.42857            | 0.33333       | 0.50000                 | 0.16667            |               |
| Department 50 | 0-4       | 0.80328                 | 0.13115            | 0.06557       | 0.76866                 | 0.18657            | 0.04478       |
|               | 5-9       | 0.94737                 | 0.00000            | 0.05263       | 0.84167                 | 0.12500            | 0.03333       |
|               | 10-14     | 0.93750                 | 0.06250            | 0.00000       | 0.80672                 | 0.16807            | 0.02521       |
|               | 15-19     | 0.86364                 | 0.13636            | 0.00000       | 0.84404                 | 0.13761            | 0.01835       |
|               | 20-24     | 0.75000                 | 0.21875            | 0.03125       | 0.67647                 | 0.22059            | 0.10294       |
|               | 25-29     | 0.59459                 | 0.27027            | 0.13514       | 0.49254                 | 0.35821            | 0.14925       |
|               | 30-34     | 0.48148                 | 0.48148            | 0.03704       | 0.50000                 | 0.42593            | 0.07407       |
|               | 35-39     | 0.61905                 | 0.28571            | 0.09524       | 0.48077                 | 0.44231            | 0.07692       |
|               | 40-44     | 0.68421                 | 0.21053            | 0.10526       | 0.34000                 | 0.36000            | 0.30000       |
|               | 45-49     | 0.43750                 | 0.50000            | 0.06250       | 0.40426                 | 0.40426            | 0.19149       |
|               | 50-54     | 0.50000                 | 0.28571            | 0.21429       | 0.27273                 | 0.50000            | 0.22727       |
| 55-59         | 0.71429   | 0.21429                 | 0.07143            | 0.47619       | 0.42857                 | 0.09524            |               |
| Department 54 | 0-4       | 0.74713                 | 0.24138            | 0.01149       | 0.83544                 | 0.10970            | 0.05485       |
|               | 5-9       | 0.92857                 | 0.02381            | 0.04762       | 0.88889                 | 0.08213            | 0.02899       |
|               | 10-14     | 0.92593                 | 0.07407            | 0.00000       | 0.87879                 | 0.08081            | 0.04040       |
|               | 15-19     | 0.92857                 | 0.04762            | 0.02381       | 0.88194                 | 0.09722            | 0.02083       |
|               | 20-24     | 0.70833                 | 0.27083            | 0.02083       | 0.72603                 | 0.20548            | 0.06849       |
|               | 25-29     | 0.77778                 | 0.20000            | 0.02222       | 0.60000                 | 0.28750            | 0.11250       |
|               | 30-34     | 0.62162                 | 0.35135            | 0.02703       | 0.47706                 | 0.30275            | 0.22018       |
|               | 35-39     | 0.50000                 | 0.42500            | 0.07500       | 0.50000                 | 0.36585            | 0.13415       |
| 40-44         | 0.40000   | 0.40000                 | 0.20000            | 0.47297       | 0.36486                 | 0.16216            |               |



| Departments   | Age group | Not- overweight in 2005 | Overweight in 2005 | Obese in 2005 | Not- overweight in 2010 | Overweight in 2010 | Obese in 2010 |
|---------------|-----------|-------------------------|--------------------|---------------|-------------------------|--------------------|---------------|
|               | 45-49     | 0.43478                 | 0.30435            | 0.26087       | 0.43056                 | 0.44444            | 0.12500       |
|               | 50-54     | 0.45000                 | 0.35000            | 0.20000       | 0.46032                 | 0.44444            | 0.09524       |
|               | 55-59     | 0.46429                 | 0.32143            | 0.21429       | 0.35417                 | 0.43750            | 0.20833       |
| Department 68 | 0-4       | 0.87500                 | 0.09375            | 0.03125       | 0.85714                 | 0.14286            | 0.00000       |
|               | 5-9       | 0.72222                 | 0.22222            | 0.05556       | 0.78947                 | 0.13684            | 0.07368       |
|               | 10-14     | 0.75000                 | 0.20000            | 0.05000       | 0.89873                 | 0.10127            | 0.00000       |
|               | 15-19     | 0.96429                 | 0.03571            | 0.00000       | 0.84722                 | 0.11111            | 0.04167       |
|               | 20-24     | 0.75000                 | 0.25000            | 0.00000       | 0.74138                 | 0.15517            | 0.10345       |
|               | 25-29     | 0.86667                 | 0.06667            | 0.06667       | 0.67391                 | 0.23913            | 0.08696       |
|               | 30-34     | 0.47368                 | 0.47368            | 0.05263       | 0.53333                 | 0.33333            | 0.13333       |
|               | 35-39     | 0.66667                 | 0.22222            | 0.11111       | 0.55882                 | 0.23529            | 0.20588       |
|               | 40-44     | 0.61905                 | 0.19048            | 0.19048       | 0.39583                 | 0.47917            | 0.12500       |
|               | 45-49     | 0.55556                 | 0.44444            | 0.00000       | 0.58621                 | 0.24138            | 0.17241       |
|               | 50-54     | 0.47059                 | 0.29412            | 0.23529       | 0.40000                 | 0.24000            | 0.36000       |
|               | 55-59     | 0.57143                 | 0.28571            | 0.14286       | 0.50000                 | 0.30000            | 0.20000       |

**Table 51. Prevalent rates of middle socioeconomic status population by age group, and body mass index category (Oriental region)**

| Departments   | Age group | Not- overweight in 2005 | Overweight in 2005 | Obese in 2005 | Not- overweight in 2010 | Overweight in 2010 | Obese in 2010 |
|---------------|-----------|-------------------------|--------------------|---------------|-------------------------|--------------------|---------------|
| Department 15 | 0-4       | 0.76190                 | 0.14286            | 0.09524       | 0.67619                 | 0.26667            | 0.05714       |
|               | 5-9       | 0.83333                 | 0.16667            | 0.00000       | 0.77778                 | 0.17094            | 0.05128       |
|               | 10-14     | 0.80952                 | 0.14286            | 0.04762       | 0.84906                 | 0.11321            | 0.03774       |
|               | 15-19     | 0.95238                 | 0.00000            | 0.04762       | 0.82143                 | 0.13095            | 0.04762       |
|               | 20-24     | 0.70000                 | 0.25000            | 0.05000       | 0.71233                 | 0.27397            | 0.01370       |
|               | 25-29     | 0.70370                 | 0.25926            | 0.03704       | 0.67164                 | 0.29851            | 0.02985       |
|               | 30-34     | 0.41667                 | 0.45833            | 0.12500       | 0.47761                 | 0.28358            | 0.23881       |
|               | 35-39     | 0.47619                 | 0.42857            | 0.09524       | 0.47619                 | 0.28571            | 0.23810       |
|               | 40-44     | 0.37500                 | 0.43750            | 0.18750       | 0.34146                 | 0.48780            | 0.17073       |
|               | 45-49     | 0.42105                 | 0.21053            | 0.36842       | 0.30000                 | 0.46000            | 0.24000       |
|               | 50-54     | 0.42857                 | 0.57143            | 0.00000       | 0.25000                 | 0.43182            | 0.31818       |
|               | 55-59     | 0.37500                 | 0.50000            | 0.12500       | 0.13636                 | 0.45455            | 0.40909       |
| Department 25 | 0-4       | 0.72414                 | 0.22414            | 0.05172       | 0.70330                 | 0.26374            | 0.03297       |
|               | 5-9       | 0.78947                 | 0.15789            | 0.05263       | 0.74775                 | 0.18919            | 0.06306       |
|               | 10-14     | 0.77778                 | 0.14815            | 0.07407       | 0.78889                 | 0.18889            | 0.02222       |
|               | 15-19     | 0.95652                 | 0.04348            | 0.00000       | 0.84722                 | 0.13889            | 0.01389       |
|               | 20-24     | 0.71154                 | 0.25000            | 0.03846       | 0.69444                 | 0.20833            | 0.09722       |
|               | 25-29     | 0.58974                 | 0.35897            | 0.05128       | 0.54098                 | 0.36066            | 0.09836       |
|               | 30-34     | 0.48649                 | 0.32432            | 0.18919       | 0.52632                 | 0.31579            | 0.15789       |
|               | 35-39     | 0.40741                 | 0.37037            | 0.22222       | 0.35593                 | 0.40678            | 0.23729       |
|               | 40-44     | 0.40741                 | 0.37037            | 0.22222       | 0.39583                 | 0.45833            | 0.14583       |
|               | 45-49     | 0.23077                 | 0.61538            | 0.15385       | 0.33333                 | 0.42105            | 0.24561       |
|               | 50-54     | 0.48000                 | 0.36000            | 0.16000       | 0.26923                 | 0.50000            | 0.23077       |
|               | 55-59     | 0.33333                 | 0.44444            | 0.22222       | 0.22222                 | 0.44444            | 0.33333       |
| Department 50 | 0-4       | 0.77922                 | 0.15584            | 0.06494       | 0.79817                 | 0.15596            | 0.04587       |
|               | 5-9       | 0.75676                 | 0.13514            | 0.10811       | 0.81188                 | 0.11881            | 0.06931       |

| Departments   | Age group | Not- overweight in 2005 | Overweight in 2005 | Obese in 2005 | Not- overweight in 2010 | Overweight in 2010 | Obese in 2010 |
|---------------|-----------|-------------------------|--------------------|---------------|-------------------------|--------------------|---------------|
|               | 10-14     | 0.84211                 | 0.10526            | 0.05263       | 0.70732                 | 0.21951            | 0.07317       |
|               | 15-19     | 0.89474                 | 0.10526            | 0.00000       | 0.84146                 | 0.10976            | 0.04878       |
|               | 20-24     | 0.62500                 | 0.25000            | 0.12500       | 0.68421                 | 0.25263            | 0.06316       |
|               | 25-29     | 0.57407                 | 0.31481            | 0.11111       | 0.63793                 | 0.18966            | 0.17241       |
|               | 30-34     | 0.41379                 | 0.44828            | 0.13793       | 0.47273                 | 0.36364            | 0.16364       |
|               | 35-39     | 0.42553                 | 0.38298            | 0.19149       | 0.40000                 | 0.41538            | 0.18462       |
|               | 40-44     | 0.36111                 | 0.33333            | 0.30556       | 0.33929                 | 0.37500            | 0.28571       |
|               | 45-49     | 0.33333                 | 0.41026            | 0.25641       | 0.31915                 | 0.48936            | 0.19149       |
|               | 50-54     | 0.20000                 | 0.43333            | 0.36667       | 0.25926                 | 0.18519            | 0.55556       |
|               | 55-59     | 0.31818                 | 0.54545            | 0.13636       | 0.27273                 | 0.50000            | 0.22727       |
| Department 54 | 0-4       | 0.79091                 | 0.18182            | 0.02727       | 0.82682                 | 0.11732            | 0.05587       |
|               | 5-9       | 0.94444                 | 0.03704            | 0.01852       | 0.80645                 | 0.14516            | 0.04839       |
|               | 10-14     | 0.89286                 | 0.10714            | 0.00000       | 0.79070                 | 0.12791            | 0.08140       |
|               | 15-19     | 0.84127                 | 0.12698            | 0.03175       | 0.78363                 | 0.15789            | 0.05848       |
|               | 20-24     | 0.73118                 | 0.23656            | 0.03226       | 0.69014                 | 0.21127            | 0.09859       |
|               | 25-29     | 0.60606                 | 0.30303            | 0.09091       | 0.55738                 | 0.28689            | 0.15574       |
|               | 30-34     | 0.55882                 | 0.27941            | 0.16176       | 0.54032                 | 0.30645            | 0.15323       |
|               | 35-39     | 0.43421                 | 0.43421            | 0.13158       | 0.37879                 | 0.40152            | 0.21970       |
|               | 40-44     | 0.40000                 | 0.45455            | 0.14545       | 0.46226                 | 0.32075            | 0.21698       |
|               | 45-49     | 0.36364                 | 0.41818            | 0.21818       | 0.27184                 | 0.44660            | 0.28155       |
|               | 50-54     | 0.42105                 | 0.26316            | 0.31579       | 0.25000                 | 0.42647            | 0.32353       |
|               | 55-59     | 0.45455                 | 0.36364            | 0.18182       | 0.32308                 | 0.43077            | 0.24615       |
| Department 68 | 0-4       | 0.769231                | 0.179487           | 0.051282      | 0.74257                 | 0.22772            | 0.02970       |
|               | 5-9       | 0.851852                | 0.111111           | 0.037037      | 0.80723                 | 0.10843            | 0.08434       |
|               | 10-14     | 0.787879                | 0.151515           | 0.060606      | 0.73585                 | 0.20755            | 0.05660       |
|               | 15-19     | 0.763158                | 0.157895           | 0.078947      | 0.72603                 | 0.19178            | 0.08219       |
|               | 20-24     | 0.760000                | 0.180000           | 0.060000      | 0.74257                 | 0.21782            | 0.03960       |
|               | 25-29     | 0.583333                | 0.354167           | 0.062500      | 0.56250                 | 0.32813            | 0.10938       |
|               | 30-34     | 0.346154                | 0.442308           | 0.211538      | 0.46875                 | 0.42188            | 0.10938       |
|               | 35-39     | 0.448980                | 0.387755           | 0.163265      | 0.41509                 | 0.37736            | 0.20755       |
|               | 40-44     | 0.410256                | 0.384615           | 0.205128      | 0.43077                 | 0.38462            | 0.18462       |
|               | 45-49     | 0.235294                | 0.529412           | 0.235294      | 0.37681                 | 0.40580            | 0.21739       |
|               | 50-54     | 0.428571                | 0.392857           | 0.178571      | 0.18421                 | 0.47368            | 0.34211       |
|               | 55-59     | 0.153846                | 0.461538           | 0.384615      | 0.32353                 | 0.38235            | 0.29412       |

**Table 52. Prevalent rates of higher socioeconomic status population by age group, and body mass index category (Oriental region)**

| Departments   | Age group | Not- overweight in 2005 | Overweight in 2005 | Obese in 2005 | Not- overweight in 2010 | Overweight in 2010 | Obese in 2010 |
|---------------|-----------|-------------------------|--------------------|---------------|-------------------------|--------------------|---------------|
| Department 15 | 0-4       | 0.80000                 | 0.14000            | 0.06000       | 0.71134                 | 0.20619            | 0.08247       |
|               | 5-9       | 0.78788                 | 0.21212            | 0.00000       | 0.80583                 | 0.13592            | 0.05825       |
|               | 10-14     | 0.83333                 | 0.11905            | 0.04762       | 0.73600                 | 0.21600            | 0.04800       |
|               | 15-19     | 0.85000                 | 0.15000            | 0.00000       | 0.82075                 | 0.16038            | 0.01887       |

| Departments   | Age group | Not- overweight in 2005 | Overweight in 2005 | Obese in 2005 | Not- overweight in 2010 | Overweight in 2010 | Obese in 2010 |
|---------------|-----------|-------------------------|--------------------|---------------|-------------------------|--------------------|---------------|
|               | 20-24     | 0.87234                 | 0.10638            | 0.02128       | 0.70000                 | 0.20000            | 0.10000       |
|               | 25-29     | 0.67500                 | 0.25000            | 0.07500       | 0.55405                 | 0.29730            | 0.14865       |
|               | 30-34     | 0.47222                 | 0.38889            | 0.13889       | 0.46774                 | 0.37097            | 0.16129       |
|               | 35-39     | 0.47619                 | 0.38095            | 0.14286       | 0.40278                 | 0.45833            | 0.13889       |
|               | 40-44     | 0.36842                 | 0.42105            | 0.21053       | 0.31646                 | 0.40506            | 0.27848       |
|               | 45-49     | 0.21212                 | 0.54545            | 0.24242       | 0.28333                 | 0.46667            | 0.25000       |
|               | 50-54     | 0.10526                 | 0.55263            | 0.34211       | 0.14286                 | 0.62500            | 0.23214       |
|               | 55-59     | 0.16000                 | 0.44000            | 0.40000       | 0.15556                 | 0.60000            | 0.24444       |
| Department 25 | 0-4       | 0.73077                 | 0.19231            | 0.07692       | 0.69048                 | 0.24603            | 0.06349       |
|               | 5-9       | 0.70909                 | 0.16364            | 0.12727       | 0.73611                 | 0.22917            | 0.03472       |
|               | 10-14     | 0.71111                 | 0.22222            | 0.06667       | 0.79661                 | 0.14689            | 0.05650       |
|               | 15-19     | 0.80392                 | 0.17647            | 0.01961       | 0.83929                 | 0.11905            | 0.04167       |
|               | 20-24     | 0.64516                 | 0.30645            | 0.04839       | 0.68571                 | 0.24762            | 0.06667       |
|               | 25-29     | 0.53125                 | 0.35938            | 0.10938       | 0.64706                 | 0.24510            | 0.10784       |
|               | 30-34     | 0.57143                 | 0.28571            | 0.14286       | 0.41096                 | 0.38356            | 0.20548       |
|               | 35-39     | 0.44615                 | 0.32308            | 0.23077       | 0.38235                 | 0.44118            | 0.17647       |
|               | 40-44     | 0.32813                 | 0.31250            | 0.35938       | 0.27027                 | 0.51351            | 0.21622       |
|               | 45-49     | 0.27451                 | 0.45098            | 0.27451       | 0.23656                 | 0.52688            | 0.23656       |
|               | 50-54     | 0.08333                 | 0.55556            | 0.36111       | 0.15217                 | 0.52174            | 0.32609       |
|               | 55-59     | 0.29268                 | 0.46341            | 0.24390       | 0.23214                 | 0.41071            | 0.35714       |
| Department 50 | 0-4       | 0.67073                 | 0.25610            | 0.07317       | 0.75701                 | 0.14019            | 0.10280       |
|               | 5-9       | 0.77419                 | 0.19355            | 0.03226       | 0.69892                 | 0.17204            | 0.12903       |
|               | 10-14     | 0.81818                 | 0.13636            | 0.04545       | 0.58036                 | 0.27679            | 0.14286       |
|               | 15-19     | 0.90411                 | 0.06849            | 0.02740       | 0.73118                 | 0.22581            | 0.04301       |
|               | 20-24     | 0.74747                 | 0.20202            | 0.05051       | 0.50617                 | 0.27160            | 0.22222       |
|               | 25-29     | 0.61250                 | 0.32500            | 0.06250       | 0.58730                 | 0.20635            | 0.20635       |
|               | 30-34     | 0.50667                 | 0.38667            | 0.10667       | 0.39744                 | 0.34615            | 0.25641       |
|               | 35-39     | 0.45882                 | 0.40000            | 0.14118       | 0.33333                 | 0.40580            | 0.26087       |
|               | 40-44     | 0.29577                 | 0.38028            | 0.32394       | 0.28767                 | 0.42466            | 0.28767       |
|               | 45-49     | 0.23077                 | 0.47692            | 0.29231       | 0.25758                 | 0.48485            | 0.25758       |
|               | 50-54     | 0.32836                 | 0.37313            | 0.29851       | 0.31579                 | 0.35088            | 0.33333       |
|               | 55-59     | 0.10000                 | 0.50000            | 0.40000       | 0.21429                 | 0.47619            | 0.30952       |
| Department 54 | 0-4       | 0.63918                 | 0.27835            | 0.08247       | 0.79167                 | 0.16667            | 0.04167       |
|               | 5-9       | 0.72727                 | 0.12727            | 0.14545       | 0.66972                 | 0.18349            | 0.14679       |
|               | 10-14     | 0.82979                 | 0.08511            | 0.08511       | 0.64151                 | 0.19811            | 0.16038       |
|               | 15-19     | 0.82540                 | 0.14286            | 0.03175       | 0.73684                 | 0.21053            | 0.05263       |
|               | 20-24     | 0.70690                 | 0.22414            | 0.06897       | 0.64368                 | 0.27586            | 0.08046       |
|               | 25-29     | 0.56667                 | 0.31111            | 0.12222       | 0.54667                 | 0.28000            | 0.17333       |
|               | 30-34     | 0.44156                 | 0.40260            | 0.15584       | 0.34211                 | 0.35526            | 0.30263       |
|               | 35-39     | 0.41860                 | 0.43023            | 0.15116       | 0.34247                 | 0.39726            | 0.26027       |
|               | 40-44     | 0.46970                 | 0.36364            | 0.16667       | 0.33333                 | 0.53086            | 0.13580       |
|               | 45-49     | 0.21429                 | 0.55952            | 0.22619       | 0.37647                 | 0.36471            | 0.25882       |
|               | 50-54     | 0.28358                 | 0.46269            | 0.25373       | 0.23529                 | 0.44118            | 0.32353       |
|               | 55-59     | 0.33333                 | 0.31111            | 0.35556       | 0.22807                 | 0.45614            | 0.31579       |
| Department    | 0-4       | 0.73333                 | 0.20952            | 0.05714       | 0.80676                 | 0.15942            | 0.03382       |

| Departments | Age group | Not- overweight in 2005 | Overweight in 2005 | Obese in 2005 | Not- overweight in 2010 | Overweight in 2010 | Obese in 2010 |
|-------------|-----------|-------------------------|--------------------|---------------|-------------------------|--------------------|---------------|
| 68          | 5-9       | 0.75862                 | 0.18966            | 0.05172       | 0.72996                 | 0.16034            | 0.10970       |
|             | 10-14     | 0.72500                 | 0.20000            | 0.07500       | 0.73333                 | 0.16296            | 0.10370       |
|             | 15-19     | 0.89412                 | 0.08235            | 0.02353       | 0.69484                 | 0.21596            | 0.08920       |
|             | 20-24     | 0.77236                 | 0.19512            | 0.03252       | 0.71698                 | 0.21698            | 0.06604       |
|             | 25-29     | 0.59000                 | 0.33000            | 0.08000       | 0.47059                 | 0.36765            | 0.16176       |
|             | 30-34     | 0.50505                 | 0.33333            | 0.16162       | 0.43353                 | 0.41040            | 0.15607       |
|             | 35-39     | 0.45545                 | 0.34653            | 0.19802       | 0.37736                 | 0.45912            | 0.16352       |
|             | 40-44     | 0.32500                 | 0.52500            | 0.15000       | 0.33166                 | 0.41206            | 0.25628       |
|             | 45-49     | 0.32632                 | 0.43158            | 0.24211       | 0.23030                 | 0.45455            | 0.31515       |
|             | 50-54     | 0.28571                 | 0.54286            | 0.17143       | 0.27143                 | 0.42857            | 0.30000       |
|             | 55-59     | 0.24000                 | 0.52000            | 0.24000       | 0.31111                 | 0.37037            | 0.31852       |

**Table 53. Mortality rates for departments and population size by age group without segregate by socioeconomic status (Oriental region) †**

| Departments   | Age group | Mortality rates (R) (%/year) | Not- overweight population in 2005 (Number of people)1 | Overweight population in 2005 (Number of people)2 | Obese population in 2005 (Number of people)3 |
|---------------|-----------|------------------------------|--------------------------------------------------------|---------------------------------------------------|----------------------------------------------|
| Department 15 | 0-4       | 0.00348                      | 46632                                                  | 8280                                              | 5666                                         |
|               | 5-9       | 0.00037                      | 51323                                                  | 12831                                             | 0                                            |
|               | 10-14     | 0.00029                      | 54874                                                  | 8851                                              | 2655                                         |
|               | 15-19     | 0.00083                      | 53331                                                  | 6464                                              | 1616                                         |
|               | 20-24     | 0.00120                      | 42790                                                  | 8810                                              | 1888                                         |
|               | 25-29     | 0.00147                      | 33519                                                  | 11362                                             | 2841                                         |
|               | 30-34     | 0.00137                      | 21103                                                  | 18822                                             | 4563                                         |
|               | 35-39     | 0.00166                      | 21422                                                  | 18362                                             | 5509                                         |
|               | 40-44     | 0.00231                      | 16324                                                  | 17490                                             | 8162                                         |
|               | 45-49     | 0.00247                      | 9627                                                   | 15043                                             | 11433                                        |
|               | 50-54     | 0.00445                      | 6016                                                   | 15643                                             | 8423                                         |
| 55-59         | 0.00649   | 4990                         | 12248                                                  | 6805                                              |                                              |
| Department 25 | 0-4       | 0.00328                      | 99214                                                  | 27688                                             | 8460                                         |
|               | 5-9       | 0.00020                      | 106953                                                 | 22020                                             | 12583                                        |
|               | 10-14     | 0.00031                      | 112889                                                 | 27367                                             | 8552                                         |
|               | 15-19     | 0.00068                      | 128656                                                 | 18121                                             | 1812                                         |
|               | 20-24     | 0.00119                      | 83108                                                  | 33617                                             | 5603                                         |
|               | 25-29     | 0.00124                      | 57872                                                  | 39733                                             | 11229                                        |
|               | 30-34     | 0.00131                      | 53493                                                  | 30799                                             | 15400                                        |
|               | 35-39     | 0.00136                      | 46239                                                  | 37385                                             | 23611                                        |
|               | 40-44     | 0.00157                      | 38320                                                  | 34488                                             | 30656                                        |
|               | 45-49     | 0.00250                      | 21473                                                  | 42945                                             | 19520                                        |
|               | 50-54     | 0.00391                      | 15822                                                  | 31643                                             | 18788                                        |
| 55-59         | 0.00605   | 15582                        | 22594                                                  | 13245                                             |                                              |
| Department 50 | 0-4       | 0.00387                      | 43508                                                  | 10877                                             | 3979                                         |
|               | 5-9       | 0.00043                      | 46087                                                  | 8335                                              | 3432                                         |
|               | 10-14     | 0.00045                      | 50731                                                  | 7032                                              | 2511                                         |

|               | Age   | Mortality rates | Not- overweight population in | Overweight population in | Obese population in 2005 |
|---------------|-------|-----------------|-------------------------------|--------------------------|--------------------------|
|               | 15-19 | 0.00087         | 51970                         | 5721                     | 954                      |
|               | 20-24 | 0.00204         | 37181                         | 11329                    | 3486                     |
|               | 25-29 | 0.00231         | 28361                         | 14737                    | 4449                     |
|               | 30-34 | 0.00221         | 20217                         | 17650                    | 4172                     |
|               | 35-39 | 0.00245         | 19584                         | 15776                    | 6256                     |
|               | 40-44 | 0.00312         | 14121                         | 12919                    | 10816                    |
|               | 45-49 | 0.00332         | 8880                          | 13954                    | 7611                     |
|               | 50-54 | 0.00537         | 7335                          | 8803                     | 7126                     |
|               | 55-59 | 0.00707         | 4965                          | 8274                     | 4728                     |
| Department 54 | 0-4   | 0.00288         | 71295                         | 22654                    | 3998                     |
|               | 5-9   | 0.00027         | 89750                         | 6904                     | 7594                     |
|               | 10-14 | 0.00025         | 86793                         | 9136                     | 3045                     |
|               | 15-19 | 0.00112         | 79891                         | 10541                    | 2774                     |
|               | 20-24 | 0.00208         | 61394                         | 20353                    | 4004                     |
|               | 25-29 | 0.00221         | 46821                         | 21181                    | 6689                     |
|               | 30-34 | 0.00286         | 34368                         | 22791                    | 8682                     |
|               | 35-39 | 0.00251         | 28618                         | 27975                    | 8360                     |
|               | 40-44 | 0.00310         | 25813                         | 24316                    | 10101                    |
|               | 45-49 | 0.00390         | 14831                         | 23792                    | 11433                    |
| Department 68 | 0-4   | 0.00252         | 93646                         | 22135                    | 6243                     |
|               | 5-9   | 0.00024         | 104748                        | 23568                    | 6547                     |
|               | 10-14 | 0.00022         | 105922                        | 26748                    | 9629                     |
|               | 15-19 | 0.00079         | 120047                        | 12732                    | 4547                     |
|               | 20-24 | 0.00119         | 98073                         | 25330                    | 4546                     |
|               | 25-29 | 0.00143         | 70983                         | 36202                    | 8518                     |
|               | 30-34 | 0.00151         | 47108                         | 39766                    | 17130                    |
|               | 35-39 | 0.00166         | 50215                         | 36406                    | 18831                    |
|               | 40-44 | 0.00186         | 37523                         | 45249                    | 16554                    |
|               | 45-49 | 0.00273         | 25817                         | 36965                    | 18189                    |
|               | 50-54 | 0.00506         | 22356                         | 30181                    | 11737                    |
|               | 55-59 | 0.00666         | 13314                         | 25148                    | 13314                    |

†Values used in this table are for the urban population

<sup>1</sup> Initial value used in the stock of not-overweight population in 2005.

<sup>2</sup> Initial value used in the stock of overweight population in 2005.

<sup>3</sup> Initial value used in the stock of obese population in 2005.

**Table 54. Mortality rates and population size by age group at the department level for the lower socioeconomic status population (Oriental region) †**

| Departments   | Age group | Mortality rates (R) (%/year) | Not- overweight population in 2005 (Number of people) <sup>1</sup> | Overweight population in 2005 (Number of people) <sup>2</sup> | Obese population in 2005 (Number of people) <sup>3</sup> |
|---------------|-----------|------------------------------|--------------------------------------------------------------------|---------------------------------------------------------------|----------------------------------------------------------|
| Department 15 | 0-4       | 0.00348                      | 15253                                                              | 2615                                                          | 2615                                                     |
|               | 5-9       | 0.00037                      | 11975                                                              | 3422                                                          | 0                                                        |
|               | 10-14     | 0.00029                      | 8851                                                               | 1770                                                          | 0                                                        |

|                      | Age          | Mortality rates | Not- overweight population in | Overweight population in | Obese population in 2005 |
|----------------------|--------------|-----------------|-------------------------------|--------------------------|--------------------------|
|                      | 15-19        | 0.00083         | 9697                          | 1616                     | 808                      |
|                      | 20-24        | 0.00120         | 8180                          | 2517                     | 629                      |
|                      | 25-29        | 0.00147         | 7386                          | 1704                     | 568                      |
|                      | 30-34        | 0.00137         | 5704                          | 4563                     | 0                        |
|                      | 35-39        | 0.00166         | 3060                          | 3060                     | 612                      |
|                      | 40-44        | 0.00231         | 4664                          | 4081                     | 1749                     |
|                      | 45-49        | 0.00247         | 602                           | 1805                     | 2407                     |
|                      | 50-54        | 0.00445         | 1805                          | 602                      | 602                      |
|                      | 55-59        | 0.00649         | 454                           | 3629                     | 1361                     |
| <b>Department 25</b> | <b>0-4</b>   | <b>0.00328</b>  | <b>23073</b>                  | <b>6153</b>              | <b>1538</b>              |
|                      | <b>5-9</b>   | <b>0.00020</b>  | <b>22020</b>                  | <b>3146</b>              | <b>0</b>                 |
|                      | <b>10-14</b> | <b>0.00031</b>  | <b>22236</b>                  | <b>3421</b>              | <b>0</b>                 |
|                      | <b>15-19</b> | <b>0.00068</b>  | <b>13822</b>                  | <b>0</b>                 | <b>6911</b>              |
|                      | <b>20-24</b> | <b>0.00119</b>  | <b>11206</b>                  | <b>3735</b>              | <b>934</b>               |
|                      | <b>25-29</b> | <b>0.00124</b>  | <b>8638</b>                   | <b>7774</b>              | <b>3455</b>              |
|                      | <b>30-34</b> | <b>0.00131</b>  | <b>6484</b>                   | <b>4863</b>              | <b>1621</b>              |
|                      | <b>35-39</b> | <b>0.00136</b>  | <b>6887</b>                   | <b>6887</b>              | <b>2951</b>              |
|                      | <b>40-44</b> | <b>0.00157</b>  | <b>7664</b>                   | <b>5748</b>              | <b>2874</b>              |
|                      | <b>45-49</b> | <b>0.00250</b>  | <b>1952</b>                   | <b>4880</b>              | <b>1952</b>              |
|                      | <b>50-54</b> | <b>0.00391</b>  | <b>989</b>                    | <b>2967</b>              | <b>1978</b>              |
|                      | <b>55-59</b> | <b>0.00605</b>  | <b>1558</b>                   | <b>1558</b>              | <b>2337</b>              |
| <b>Department 50</b> | <b>0-4</b>   | <b>0.00387</b>  | <b>12999</b>                  | <b>2122</b>              | <b>1061</b>              |
|                      | <b>5-9</b>   | <b>0.00043</b>  | <b>8825</b>                   | <b>0</b>                 | <b>490</b>               |
|                      | <b>10-14</b> | <b>0.00045</b>  | <b>7534</b>                   | <b>502</b>               | <b>0</b>                 |
|                      | <b>15-19</b> | <b>0.00087</b>  | <b>8378</b>                   | <b>1323</b>              | <b>0</b>                 |
|                      | <b>20-24</b> | <b>0.00204</b>  | <b>6971</b>                   | <b>2033</b>              | <b>290</b>               |
|                      | <b>25-29</b> | <b>0.00231</b>  | <b>6117</b>                   | <b>2781</b>              | <b>1390</b>              |
|                      | <b>30-34</b> | <b>0.00221</b>  | <b>4172</b>                   | <b>4172</b>              | <b>321</b>               |
|                      | <b>35-39</b> | <b>0.00245</b>  | <b>3536</b>                   | <b>1632</b>              | <b>544</b>               |
|                      | <b>40-44</b> | <b>0.00312</b>  | <b>3906</b>                   | <b>1202</b>              | <b>601</b>               |
|                      | <b>45-49</b> | <b>0.00332</b>  | <b>1776</b>                   | <b>2030</b>              | <b>254</b>               |
|                      | <b>50-54</b> | <b>0.00537</b>  | <b>1467</b>                   | <b>838</b>               | <b>629</b>               |
|                      | <b>55-59</b> | <b>0.00707</b>  | <b>2364</b>                   | <b>709</b>               | <b>236</b>               |
| <b>Department 54</b> | <b>0-4</b>   | <b>0.00288</b>  | <b>21655</b>                  | <b>6996</b>              | <b>333</b>               |
|                      | <b>5-9</b>   | <b>0.00027</b>  | <b>26925</b>                  | <b>690</b>               | <b>1381</b>              |
|                      | <b>10-14</b> | <b>0.00025</b>  | <b>19034</b>                  | <b>1523</b>              | <b>0</b>                 |
|                      | <b>15-19</b> | <b>0.00112</b>  | <b>21637</b>                  | <b>1110</b>              | <b>555</b>               |
|                      | <b>20-24</b> | <b>0.00208</b>  | <b>11344</b>                  | <b>4338</b>              | <b>334</b>               |
|                      | <b>25-29</b> | <b>0.00221</b>  | <b>13006</b>                  | <b>3344</b>              | <b>372</b>               |
|                      | <b>30-34</b> | <b>0.00286</b>  | <b>8321</b>                   | <b>4703</b>              | <b>362</b>               |
|                      | <b>35-39</b> | <b>0.00251</b>  | <b>6431</b>                   | <b>5466</b>              | <b>965</b>               |
|                      | <b>40-44</b> | <b>0.00310</b>  | <b>5986</b>                   | <b>5986</b>              | <b>2993</b>              |
|                      | <b>45-49</b> | <b>0.00390</b>  | <b>3090</b>                   | <b>2163</b>              | <b>1854</b>              |
|                      | <b>50-54</b> | <b>0.00619</b>  | <b>2875</b>                   | <b>2236</b>              | <b>1278</b>              |
|                      | <b>55-59</b> | <b>0.00799</b>  | <b>3807</b>                   | <b>2635</b>              | <b>1757</b>              |

| Department    | Age group | Mortality rates | Not- overweight population in 2005 (Number of people) <sup>1</sup> | Overweight population in 2005 (Number of people) <sup>2</sup> | Obese population in 2005 (Number of people) <sup>3</sup> |
|---------------|-----------|-----------------|--------------------------------------------------------------------|---------------------------------------------------------------|----------------------------------------------------------|
| Department 68 | 0-4       | 0.00252         | 15891                                                              | 1703                                                          | 568                                                      |
|               | 5-9       | 0.00024         | 17022                                                              | 5237                                                          | 1309                                                     |
|               | 10-14     | 0.00022         | 16049                                                              | 4280                                                          | 1070                                                     |
|               | 15-19     | 0.00079         | 24555                                                              | 909                                                           | 0                                                        |
|               | 20-24     | 0.00119         | 11691                                                              | 3897                                                          | 0                                                        |
|               | 25-29     | 0.00143         | 9228                                                               | 710                                                           | 710                                                      |
|               | 30-34     | 0.00151         | 5506                                                               | 5506                                                          | 612                                                      |
|               | 35-39     | 0.00166         | 7532                                                               | 2511                                                          | 1255                                                     |
|               | 40-44     | 0.00186         | 7174                                                               | 2207                                                          | 2207                                                     |
|               | 45-49     | 0.00273         | 2934                                                               | 2347                                                          | 0                                                        |
|               | 50-54     | 0.00506         | 4471                                                               | 2795                                                          | 2236                                                     |
| 55-59         | 0.00666   | 2959            | 1479                                                               | 740                                                           |                                                          |

<sup>†</sup>Values used in this table are for the urban population

<sup>1</sup> Initial value used in the stock of not-overweight population in 2005 for lower SES.

<sup>2</sup> Initial value used in the stock of overweight population in 2005 for lower SES.

<sup>3</sup> Initial value used in the stock of obese population in 2005 for lower SES.

**Table 55. Mortality rates and population size by age group at the department level for the middle socioeconomic status population (Oriental region) <sup>†</sup>**

| Departments   | Age group | Mortality rates (R) (%/year) | Not- overweight population in 2005 (Number of people) <sup>1</sup> | Overweight population in 2005 (Number of people) <sup>2</sup> | Obese population in 2005 (Number of people) <sup>3</sup> |
|---------------|-----------|------------------------------|--------------------------------------------------------------------|---------------------------------------------------------------|----------------------------------------------------------|
| Department 15 | 0-4       | 0.00348                      | 13946                                                              | 2615                                                          | 1743                                                     |
|               | 5-9       | 0.00037                      | 17108                                                              | 3422                                                          | 0                                                        |
|               | 10-14     | 0.00029                      | 15046                                                              | 2655                                                          | 885                                                      |
|               | 15-19     | 0.00083                      | 16161                                                              | 0                                                             | 808                                                      |
|               | 20-24     | 0.00120                      | 8810                                                               | 3146                                                          | 629                                                      |
|               | 25-29     | 0.00147                      | 10794                                                              | 3977                                                          | 568                                                      |
|               | 30-34     | 0.00137                      | 5704                                                               | 6274                                                          | 1711                                                     |
|               | 35-39     | 0.00166                      | 6121                                                               | 5509                                                          | 1224                                                     |
|               | 40-44     | 0.00231                      | 3498                                                               | 4081                                                          | 1749                                                     |
|               | 45-49     | 0.00247                      | 4814                                                               | 2407                                                          | 4212                                                     |
|               | 50-54     | 0.00445                      | 1805                                                               | 2407                                                          | 0                                                        |
| 55-59         | 0.00649   | 2722                         | 3629                                                               | 907                                                           |                                                          |
| Department 25 | 0-4       | 0.00328                      | 32302                                                              | 9998                                                          | 2307                                                     |
|               | 5-9       | 0.00020                      | 23593                                                              | 4719                                                          | 1573                                                     |
|               | 10-14     | 0.00031                      | 35919                                                              | 6842                                                          | 3421                                                     |
|               | 15-19     | 0.00068                      | 38011                                                              | 1728                                                          | 0                                                        |
|               | 20-24     | 0.00119                      | 34550                                                              | 12139                                                         | 1868                                                     |
|               | 25-29     | 0.00124                      | 19867                                                              | 12093                                                         | 1728                                                     |
|               | 30-34     | 0.00131                      | 14589                                                              | 9726                                                          | 5674                                                     |
|               | 35-39     | 0.00136                      | 10822                                                              | 9838                                                          | 5903                                                     |
|               | 40-44     | 0.00157                      | 10538                                                              | 9580                                                          | 5748                                                     |
|               | 45-49     | 0.00250                      | 5856                                                               | 15616                                                         | 3904                                                     |
|               | 50-54     | 0.00391                      | 11866                                                              | 8900                                                          | 3955                                                     |
| 55-59         | 0.00605   | 4675                         | 6233                                                               | 3116                                                          |                                                          |

| Department    | Age group | Mortality rates | Not- overweight population in 2005 (Number of people)1 | Overweight population in 2005 (Number of people)2 | Obese population in 2005 (Number of people)3 |
|---------------|-----------|-----------------|--------------------------------------------------------|---------------------------------------------------|----------------------------------------------|
| Department 50 | 0-4       | 0.00387         | 15918                                                  | 3184                                              | 1326                                         |
|               | 5-9       | 0.00043         | 13728                                                  | 2451                                              | 1961                                         |
|               | 10-14     | 0.00045         | 16073                                                  | 2009                                              | 1005                                         |
|               | 15-19     | 0.00087         | 14992                                                  | 1764                                              | 0                                            |
|               | 20-24     | 0.00204         | 8714                                                   | 3486                                              | 1743                                         |
|               | 25-29     | 0.00231         | 8620                                                   | 4727                                              | 1668                                         |
|               | 30-34     | 0.00221         | 3851                                                   | 4172                                              | 1284                                         |
|               | 35-39     | 0.00245         | 5440                                                   | 4896                                              | 2448                                         |
|               | 40-44     | 0.00312         | 3906                                                   | 3605                                              | 3305                                         |
|               | 45-49     | 0.00332         | 3298                                                   | 4059                                              | 2537                                         |
|               | 50-54     | 0.00537         | 1258                                                   | 2725                                              | 2305                                         |
| Department 54 | 0-4       | 0.00288         | 28984                                                  | 6663                                              | 999                                          |
|               | 5-9       | 0.00027         | 35210                                                  | 1381                                              | 690                                          |
|               | 10-14     | 0.00025         | 38067                                                  | 4568                                              | 0                                            |
|               | 15-19     | 0.00112         | 29404                                                  | 4438                                              | 1110                                         |
|               | 20-24     | 0.00208         | 22689                                                  | 7341                                              | 1001                                         |
|               | 25-29     | 0.00221         | 14864                                                  | 7432                                              | 2230                                         |
|               | 30-34     | 0.00286         | 13747                                                  | 6874                                              | 3979                                         |
|               | 35-39     | 0.00251         | 10611                                                  | 10611                                             | 3215                                         |
|               | 40-44     | 0.00310         | 8230                                                   | 9352                                              | 2993                                         |
|               | 45-49     | 0.00390         | 6180                                                   | 7107                                              | 3708                                         |
|               | 50-54     | 0.00619         | 5111                                                   | 3194                                              | 3833                                         |
| Department 68 | 0-4       | 0.00252         | 34053                                                  | 7946                                              | 2270                                         |
|               | 5-9       | 0.00024         | 30115                                                  | 3928                                              | 1309                                         |
|               | 10-14     | 0.00022         | 27818                                                  | 5350                                              | 2140                                         |
|               | 15-19     | 0.00079         | 26374                                                  | 5457                                              | 2728                                         |
|               | 20-24     | 0.00119         | 24681                                                  | 5845                                              | 1948                                         |
|               | 25-29     | 0.00143         | 19875                                                  | 12067                                             | 2130                                         |
|               | 30-34     | 0.00151         | 11012                                                  | 14071                                             | 6730                                         |
|               | 35-39     | 0.00166         | 13809                                                  | 11926                                             | 5021                                         |
|               | 40-44     | 0.00186         | 8829                                                   | 8277                                              | 4414                                         |
|               | 45-49     | 0.00273         | 4694                                                   | 10561                                             | 4694                                         |
|               | 50-54     | 0.00506         | 6707                                                   | 6148                                              | 2795                                         |
|               | 55-59     | 0.00666         | 1479                                                   | 4438                                              | 3698                                         |

†Values used in this table are for the urban population

1 Initial value used in the stock of not-overweight population in 2005 for middle SES.

2 Initial value used in the stock of overweight population in 2005 for middle SES.

3 Initial value used in the stock of obese population in 2005 for middle SES.

**Table 56. Mortality rates and population size by age group at the department level for the higher socioeconomic status population (Oriental region) †**

| Departments | Age group | Mortality rates (R) (%/year) | Not- overweight population in 2005 (Number of people)1 | Overweight population in 2005 (Number of people)2 | Obese population in 2005 (Number of people)3 |
|-------------|-----------|------------------------------|--------------------------------------------------------|---------------------------------------------------|----------------------------------------------|
|-------------|-----------|------------------------------|--------------------------------------------------------|---------------------------------------------------|----------------------------------------------|



| Department    | Age     | Mortality rates | Not- overweight population in | Overweight population in | Obese population in 2005 |
|---------------|---------|-----------------|-------------------------------|--------------------------|--------------------------|
| Department 15 | 0-4     | 0.00348         | 17433                         | 3051                     | 1307                     |
|               | 5-9     | 0.00037         | 22240                         | 5988                     | 0                        |
|               | 10-14   | 0.00029         | 30977                         | 4425                     | 1770                     |
|               | 15-19   | 0.00083         | 27474                         | 4848                     | 0                        |
|               | 20-24   | 0.00120         | 25800                         | 3146                     | 629                      |
|               | 25-29   | 0.00147         | 15339                         | 5681                     | 1704                     |
|               | 30-34   | 0.00137         | 9696                          | 7985                     | 2852                     |
|               | 35-39   | 0.00166         | 12241                         | 9793                     | 3672                     |
|               | 40-44   | 0.00231         | 8162                          | 9328                     | 4664                     |
|               | 45-49   | 0.00247         | 4212                          | 10831                    | 4814                     |
|               | 50-54   | 0.00445         | 2407                          | 12634                    | 7821                     |
| Department 25 | 55-59   | 0.00649         | 1815                          | 4990                     | 4536                     |
|               | 0-4     | 0.00328         | 43839                         | 11537                    | 4615                     |
|               | 5-9     | 0.00020         | 61341                         | 14156                    | 11010                    |
|               | 10-14   | 0.00031         | 54734                         | 17104                    | 5131                     |
|               | 15-19   | 0.00068         | 70839                         | 15550                    | 1728                     |
|               | 20-24   | 0.00119         | 37352                         | 17742                    | 2801                     |
|               | 25-29   | 0.00124         | 29368                         | 19867                    | 6046                     |
|               | 30-34   | 0.00131         | 32420                         | 16210                    | 8105                     |
|               | 35-39   | 0.00136         | 28530                         | 20660                    | 14757                    |
|               | 40-44   | 0.00157         | 20118                         | 19160                    | 22034                    |
|               | 45-49   | 0.00250         | 13664                         | 22449                    | 13664                    |
| Department 50 | 50-54   | 0.00391         | 2967                          | 19777                    | 12855                    |
|               | 55-59   | 0.00605         | 9349                          | 14803                    | 7791                     |
|               | 0-4     | 0.00387         | 14591                         | 5571                     | 1592                     |
|               | 5-9     | 0.00043         | 23534                         | 5883                     | 981                      |
|               | 10-14   | 0.00045         | 27123                         | 4521                     | 1507                     |
|               | 15-19   | 0.00087         | 29102                         | 2205                     | 882                      |
|               | 20-24   | 0.00204         | 21495                         | 5809                     | 1452                     |
|               | 25-29   | 0.00231         | 13625                         | 7229                     | 1390                     |
|               | 30-34   | 0.00221         | 12195                         | 9306                     | 2567                     |
|               | 35-39   | 0.00245         | 10608                         | 9248                     | 3264                     |
|               | 40-44   | 0.00312         | 6309                          | 8112                     | 6910                     |
| Department 54 | 45-49   | 0.00332         | 3806                          | 7865                     | 4820                     |
|               | 50-54   | 0.00537         | 4611                          | 5240                     | 4192                     |
|               | 55-59   | 0.00707         | 946                           | 4728                     | 3783                     |
|               | 0-4     | 0.00288         | 20655                         | 8995                     | 2665                     |
|               | 5-9     | 0.00027         | 27615                         | 4833                     | 5523                     |
|               | 10-14   | 0.00025         | 29693                         | 3045                     | 3045                     |
|               | 15-19   | 0.00112         | 28849                         | 4993                     | 1110                     |
|               | 20-24   | 0.00208         | 27360                         | 8675                     | 2669                     |
|               | 25-29   | 0.00221         | 18951                         | 10405                    | 4088                     |
|               | 30-34   | 0.00286         | 12300                         | 11215                    | 4341                     |
|               | 35-39   | 0.00251         | 11576                         | 11897                    | 4180                     |
| 40-44         | 0.00310 | 11597           | 8978                          | 4115                     |                          |
| 45-49         | 0.00390 | 5562            | 14522                         | 5871                     |                          |

| Department    | Age     | Mortality rates | Not- overweight population in | Overweight population in | Obese population in 2005 |
|---------------|---------|-----------------|-------------------------------|--------------------------|--------------------------|
|               | 50-54   | 0.00619         | 6069                          | 9902                     | 5430                     |
| 55-59         | 0.00799 | 4392            | 4099                          | 4685                     |                          |
| Department 68 | 0-4     | 0.00252         | 43702                         | 12486                    | 3405                     |
|               | 5-9     | 0.00024         | 57611                         | 14403                    | 3928                     |
|               | 10-14   | 0.00022         | 62055                         | 17119                    | 6420                     |
|               | 15-19   | 0.00079         | 69118                         | 6366                     | 1819                     |
|               | 20-24   | 0.00119         | 61702                         | 15588                    | 2598                     |
|               | 25-29   | 0.00143         | 41880                         | 23425                    | 5679                     |
|               | 30-34   | 0.00151         | 30589                         | 20189                    | 9789                     |
|               | 35-39   | 0.00166         | 28873                         | 21969                    | 12554                    |
|               | 40-44   | 0.00186         | 21521                         | 34764                    | 9933                     |
|               | 45-49   | 0.00273         | 18189                         | 24057                    | 13495                    |
|               | 50-54   | 0.00506         | 11178                         | 21238                    | 6707                     |
|               | 55-59   | 0.00666         | 8876                          | 19231                    | 8876                     |

<sup>†</sup>Values used in this table are for the urban population

<sup>1</sup> Initial value used in the stock of not-overweight population in 2005 for higher SES.

<sup>2</sup> Initial value used in the stock of overweight population in 2005 for higher SES.

<sup>3</sup> Initial value used in the stock of obese population in 2005 for higher SES.

## 1.3 Central region

The Central region of Colombia is located in the central area of the national territory and consists of seven departments, these are:

- Antioquia (5)
- Caldas (17)
- Caquetá (18)
- Huila (41)
- Quindío (63)
- Risaralda (66)
- Tolima (73)

### 1.3.1 Data and model parameters used

**Table 57. Prevalent rates of entire population by age group, sex, and body mass index category in 2005 (Central region)**

| Age Group | Nutritional State Male |           |         | Nutritional State Female |           |         |
|-----------|------------------------|-----------|---------|--------------------------|-----------|---------|
|           | Not-Overweigh          | Overweigh | Obese   | Not-Overweigh            | Overweigh | Obese   |
| 0-4       | 0.76770                | 0.16770   | 0.06460 | 0.78267                  | 0.16933   | 0.04800 |
| 5-9       | 0.81472                | 0.13198   | 0.05330 | 0.82339                  | 0.14081   | 0.03580 |
| 10-14     | 0.82791                | 0.13488   | 0.03721 | 0.82725                  | 0.12652   | 0.04623 |
| 15-19     | 0.90638                | 0.07447   | 0.01915 | 0.83814                  | 0.13301   | 0.02885 |
| 20-24     | 0.80000                | 0.14959   | 0.05041 | 0.77162                  | 0.17295   | 0.05543 |
| 25-29     | 0.67008                | 0.26844   | 0.06148 | 0.66667                  | 0.24151   | 0.09182 |
| 30-34     | 0.51111                | 0.38519   | 0.10370 | 0.55686                  | 0.31895   | 0.12418 |
| 35-39     | 0.48931                | 0.39430   | 0.11639 | 0.47821                  | 0.35714   | 0.16465 |
| 40-44     | 0.46599                | 0.42569   | 0.10831 | 0.44226                  | 0.36745   | 0.19029 |

|       |         |         |         |         |         |         |
|-------|---------|---------|---------|---------|---------|---------|
| 45-49 | 0.46226 | 0.42689 | 0.11085 | 0.33725 | 0.40000 | 0.26275 |
| 50-54 | 0.44126 | 0.44986 | 0.10888 | 0.28033 | 0.41967 | 0.30000 |
| 55-59 | 0.41603 | 0.41221 | 0.17176 | 0.29211 | 0.42431 | 0.28358 |

**Table 58. Prevalent rates of lower socioeconomic status population by age group, sex, and body mass index category in 2005 (Central region)**

| Age Group | Nutritional State Male |           |         | Nutritional State Female |           |         |
|-----------|------------------------|-----------|---------|--------------------------|-----------|---------|
|           | Not-Overweigh          | Overweigh | Obese   | Not-Overweigh            | Overweigh | Obese   |
| 0-4       | 0.78008                | 0.17012   | 0.04979 | 0.84038                  | 0.13615   | 0.02347 |
| 5-9       | 0.84211                | 0.13158   | 0.02632 | 0.85882                  | 0.12941   | 0.01176 |
| 10-14     | 0.87640                | 0.11236   | 0.01124 | 0.87000                  | 0.10000   | 0.03000 |
| 15-19     | 0.94681                | 0.05319   | 0.00000 | 0.81395                  | 0.17829   | 0.00775 |
| 20-24     | 0.87736                | 0.06604   | 0.05660 | 0.77326                  | 0.16279   | 0.06395 |
| 25-29     | 0.75510                | 0.22449   | 0.02041 | 0.64706                  | 0.22794   | 0.12500 |
| 30-34     | 0.63636                | 0.27273   | 0.09091 | 0.51724                  | 0.39310   | 0.08966 |
| 35-39     | 0.71212                | 0.21212   | 0.07576 | 0.38235                  | 0.41176   | 0.20588 |
| 40-44     | 0.66667                | 0.26667   | 0.06667 | 0.36538                  | 0.33654   | 0.29808 |
| 45-49     | 0.56757                | 0.39189   | 0.04054 | 0.41489                  | 0.43617   | 0.14894 |
| 50-54     | 0.58209                | 0.40299   | 0.01493 | 0.41053                  | 0.34737   | 0.24211 |
| 55-59     | 0.58182                | 0.30909   | 0.10909 | 0.43548                  | 0.29032   | 0.27419 |

**Table 59. Prevalent rates of middle socioeconomic status population by age group, sex, and body mass index category in 2005 (Central region)**

| Age Group | Nutritional State Male |           |         | Nutritional State Female |           |         |
|-----------|------------------------|-----------|---------|--------------------------|-----------|---------|
|           | Not-Overweigh          | Overweigh | Obese   | Not-Overweigh            | Overweigh | Obese   |
| 0-4       | 0.77273                | 0.15909   | 0.06818 | 0.75104                  | 0.18257   | 0.06639 |
| 5-9       | 0.82963                | 0.11852   | 0.05185 | 0.84071                  | 0.10619   | 0.05310 |
| 10-14     | 0.84932                | 0.11644   | 0.03425 | 0.84000                  | 0.12800   | 0.03200 |
| 15-19     | 0.88636                | 0.09091   | 0.02273 | 0.87135                  | 0.09942   | 0.02924 |
| 20-24     | 0.86628                | 0.08140   | 0.05233 | 0.75290                  | 0.18147   | 0.06564 |
| 25-29     | 0.72180                | 0.21053   | 0.06767 | 0.62931                  | 0.26293   | 0.10776 |
| 30-34     | 0.57480                | 0.34646   | 0.07874 | 0.46117                  | 0.36893   | 0.16990 |
| 35-39     | 0.49600                | 0.40800   | 0.09600 | 0.46875                  | 0.34375   | 0.18750 |
| 40-44     | 0.51754                | 0.40351   | 0.07895 | 0.38378                  | 0.41081   | 0.20541 |
| 45-49     | 0.53571                | 0.33929   | 0.12500 | 0.28037                  | 0.46729   | 0.25234 |
| 50-54     | 0.52564                | 0.39744   | 0.07692 | 0.24823                  | 0.38298   | 0.36879 |
| 55-59     | 0.47273                | 0.40000   | 0.12727 | 0.29293                  | 0.42424   | 0.28283 |

**Table 60. Prevalent rates of higher socioeconomic status population by age group, sex, and body mass index category in 2005 (Central region)**

| Age Group | Nutritional State Male |              |              | Nutritional State Female |            |            |
|-----------|------------------------|--------------|--------------|--------------------------|------------|------------|
|           | Not-Overweigh          | Overweigh    | Obese        | Not-Overweigh            | Overweigh  | Obese      |
| 0-4       | 0,7533333333           | 0,1733333333 | 0,0733333333 | 0,76689189               | 0,18243243 | 0,05067568 |
| 5-9       | 0,792349727            | 0,142076503  | 0,065573770  | 0,80090498               | 0,16289593 | 0,0361991  |

|       |             |             |             |            |            |            |
|-------|-------------|-------------|-------------|------------|------------|------------|
| 10-14 | 0,789743590 | 0,158974359 | 0,051282051 | 0,79569892 | 0,13978495 | 0,06451613 |
| 15-19 | 0,901639344 | 0,073770492 | 0,024590164 | 0,83024691 | 0,13271605 | 0,03703704 |
| 20-24 | 0,741839763 | 0,210682493 | 0,047477745 | 0,78131635 | 0,17197452 | 0,04670913 |
| 25-29 | 0,610894942 | 0,315175097 | 0,073929961 | 0,69320843 | 0,23419204 | 0,07259953 |
| 30-34 | 0,433962264 | 0,443396226 | 0,122641509 | 0,61835749 | 0,26811594 | 0,11352657 |
| 35-39 | 0,421739130 | 0,439130435 | 0,139130435 | 0,51072961 | 0,34763948 | 0,1416309  |
| 40-44 | 0,385650224 | 0,479820628 | 0,134529148 | 0,4820296  | 0,35729387 | 0,16067653 |
| 45-49 | 0,394957983 | 0,478991597 | 0,126050420 | 0,34792123 | 0,36105033 | 0,29102845 |
| 50-54 | 0,362745098 | 0,485294118 | 0,151960784 | 0,25935829 | 0,45187166 | 0,28877005 |
| 55-59 | 0,335526316 | 0,453947368 | 0,210526316 | 0,26298701 | 0,4512987  | 0,28571429 |

**Table 61. Prevalent rates of entire population by age group, sex, and body mass index category in 2010 (Central region)**

| Age Group | Nutritional State Male |           |         | Nutritional State Female |           |         |
|-----------|------------------------|-----------|---------|--------------------------|-----------|---------|
|           | Not-Overweigh          | Overweigh | Obese   | Not-Overweigh            | Overweigh | Obese   |
| 0-4       | 0.75646                | 0.20204   | 0.04150 | 0.74368                  | 0.20573   | 0.05059 |
| 5-9       | 0.74457                | 0.15421   | 0.10122 | 0.78224                  | 0.15574   | 0.06202 |
| 10-14     | 0.77203                | 0.15971   | 0.06826 | 0.80088                  | 0.16206   | 0.03706 |
| 15-19     | 0.86534                | 0.10670   | 0.02796 | 0.80834                  | 0.14375   | 0.04792 |
| 20-24     | 0.75588                | 0.19216   | 0.05196 | 0.70886                  | 0.21296   | 0.07818 |
| 25-29     | 0.56257                | 0.33333   | 0.10410 | 0.57454                  | 0.29481   | 0.13065 |
| 30-34     | 0.44140                | 0.40274   | 0.15586 | 0.48689                  | 0.34003   | 0.17308 |
| 35-39     | 0.41395                | 0.43323   | 0.15282 | 0.40151                  | 0.39114   | 0.20735 |
| 40-44     | 0.41495                | 0.43428   | 0.15077 | 0.35678                  | 0.39365   | 0.24957 |
| 45-49     | 0.37926                | 0.44611   | 0.17462 | 0.32857                  | 0.42411   | 0.24732 |
| 50-54     | 0.36364                | 0.48963   | 0.14673 | 0.26022                  | 0.40799   | 0.33178 |
| 55-59     | 0.42214                | 0.43902   | 0.13884 | 0.26460                  | 0.38261   | 0.35280 |

**Table 62. Prevalent rates of lower socioeconomic status population by age group, sex, and body mass index category in 2010 (Central region)**

| Age Group | Nutritional State Male |           |         | Nutritional State Female |           |         |
|-----------|------------------------|-----------|---------|--------------------------|-----------|---------|
|           | Not-Overweigh          | Overweigh | Obese   | Not-Overweigh            | Overweigh | Obese   |
| 0-4       | 0.77744                | 0.18598   | 0.03659 | 0.74390                  | 0.20122   | 0.05488 |
| 5-9       | 0.82245                | 0.12010   | 0.05744 | 0.87216                  | 0.10227   | 0.02557 |
| 10-14     | 0.86006                | 0.10787   | 0.03207 | 0.86216                  | 0.10270   | 0.03514 |
| 15-19     | 0.87956                | 0.10219   | 0.01825 | 0.79630                  | 0.15432   | 0.04938 |
| 20-24     | 0.80000                | 0.13846   | 0.06154 | 0.72951                  | 0.18443   | 0.08607 |
| 25-29     | 0.65625                | 0.24375   | 0.10000 | 0.60699                  | 0.25764   | 0.13537 |
| 30-34     | 0.60843                | 0.28313   | 0.10843 | 0.40094                  | 0.36792   | 0.23113 |
| 35-39     | 0.52174                | 0.36522   | 0.11304 | 0.37436                  | 0.37436   | 0.25128 |
| 40-44     | 0.59016                | 0.33607   | 0.07377 | 0.29825                  | 0.39766   | 0.30409 |
| 45-49     | 0.47826                | 0.38261   | 0.13913 | 0.36000                  | 0.36000   | 0.28000 |
| 50-54     | 0.48598                | 0.41121   | 0.10280 | 0.25342                  | 0.39726   | 0.34932 |
| 55-59     | 0.60000                | 0.35789   | 0.04211 | 0.74390                  | 0.20122   | 0.05488 |

**Table 63. Prevalent rates of middle socioeconomic status population by age group, sex, and body mass index category in 2010 (Central region)**

| Age Group | Nutritional State Male |           |         | Nutritional State Female |           |         |
|-----------|------------------------|-----------|---------|--------------------------|-----------|---------|
|           | Not-Overweigh          | Overweigh | Obese   | Not-Overweigh            | Overweigh | Obese   |
| 0-4       | 0.75159                | 0.21444   | 0.03397 | 0.74641                  | 0.22249   | 0.03110 |
| 5-9       | 0.73814                | 0.16495   | 0.09691 | 0.79183                  | 0.14008   | 0.06809 |
| 10-14     | 0.78053                | 0.15076   | 0.06870 | 0.79779                  | 0.16544   | 0.03676 |
| 15-19     | 0.86019                | 0.10427   | 0.03555 | 0.82286                  | 0.13905   | 0.03810 |
| 20-24     | 0.78917                | 0.17379   | 0.03704 | 0.69167                  | 0.20833   | 0.10000 |
| 25-29     | 0.56610                | 0.34237   | 0.09153 | 0.55206                  | 0.27603   | 0.17191 |
| 30-34     | 0.42254                | 0.41549   | 0.16197 | 0.45902                  | 0.35792   | 0.18306 |
| 35-39     | 0.47210                | 0.42489   | 0.10300 | 0.36857                  | 0.40000   | 0.23143 |
| 40-44     | 0.37021                | 0.46383   | 0.16596 | 0.35150                  | 0.34877   | 0.29973 |
| 45-49     | 0.42678                | 0.43933   | 0.13389 | 0.30699                  | 0.41337   | 0.27964 |
| 50-54     | 0.39785                | 0.47312   | 0.12903 | 0.24847                  | 0.42025   | 0.33129 |
| 55-59     | 0.40506                | 0.42405   | 0.17089 | 0.27103                  | 0.35981   | 0.36916 |

**Table 64. Prevalent rates of higher socioeconomic status population by age group, sex, and body mass index category in 2010 (Central region)**

| Age Group | Nutritional State Male |           |         | Nutritional State Female |           |         |
|-----------|------------------------|-----------|---------|--------------------------|-----------|---------|
|           | Not-Overweigh          | Overweigh | Obese   | Not-Overweigh            | Overweigh | Obese   |
| 0-4       | 0.74686                | 0.20084   | 0.05230 | 0.74091                  | 0.19318   | 0.06591 |
| 5-9       | 0.70033                | 0.16722   | 0.13245 | 0.71609                  | 0.20434   | 0.07957 |
| 10-14     | 0.71807                | 0.19470   | 0.08723 | 0.76991                  | 0.19174   | 0.03835 |
| 15-19     | 0.86275                | 0.11011   | 0.02715 | 0.80343                  | 0.14248   | 0.05409 |
| 20-24     | 0.71308                | 0.22785   | 0.05907 | 0.71405                  | 0.22779   | 0.05816 |
| 25-29     | 0.52679                | 0.35938   | 0.11384 | 0.57790                  | 0.32428   | 0.09783 |
| 30-34     | 0.37784                | 0.44886   | 0.17330 | 0.53710                  | 0.31802   | 0.14488 |
| 35-39     | 0.33436                | 0.46319   | 0.20245 | 0.43411                  | 0.39147   | 0.17442 |
| 40-44     | 0.38902                | 0.44630   | 0.16468 | 0.37580                  | 0.41879   | 0.20541 |
| 45-49     | 0.31926                | 0.46966   | 0.21108 | 0.33229                  | 0.44462   | 0.22309 |
| 50-54     | 0.30539                | 0.52395   | 0.17066 | 0.26821                  | 0.40397   | 0.32781 |
| 55-59     | 0.37143                | 0.47500   | 0.15357 | 0.26122                  | 0.40000   | 0.33878 |

**Table 65 Fraction of births for men by body mass index category, sex, and socioeconomic status (Central region)†**

| Population group | Lower SES (%/year) | Middle SES (%/year) | Higher SES (%/year) | Complete Urban Population (%/year) |
|------------------|--------------------|---------------------|---------------------|------------------------------------|
| Not- overweight  | 85,48%             | 78,00%              | 85,51%              | 83,43%                             |
| Overweight       | 11,29%             | 12,00%              | 11,59%              | 11,60%                             |
| Obese            | 3,23%              | 10,00%              | 2,90%               | 4,97%                              |

† The fractions of births by each BMI category correspond to the prevalences by BMI category of children aged 0 to 12 months

**Table 66. Fraction of births for women by body mass index category and socioeconomic status (Central region)†**

| Population group | Lower SES (%/year) | Middle SES (%/year) | Higher SES (%/year) | Complete Urban Population (%/year) |
|------------------|--------------------|---------------------|---------------------|------------------------------------|
| Not- overweight  | 79,41%             | 82,22%              | 76,79%              | 79,26%                             |
| Overweight       | 17,65%             | 15,56%              | 19,64%              | 17,78%                             |
| Obese            | 2,94%              | 2,22%               | 3,57%               | 2,96%                              |

† The fractions of births by each BMI category correspond to the prevalences by BMI category of children aged 0 to 12 months

**Table 67. Mortality rates for men and population size by age group without segregate by socioeconomic status (Central region)†**

| Age group | Mortality rates (R) (%/year) | Not- overweight men in 2005 (Number of people) <sup>1</sup> | Overweight men in 2005 (Number of people) <sup>2</sup> | Obese men in 2005 (Number of people) <sup>3</sup> |
|-----------|------------------------------|-------------------------------------------------------------|--------------------------------------------------------|---------------------------------------------------|
| 0-4       | 0.00324                      | 273833                                                      | 59818                                                  | 23041                                             |
| 5-9       | 0.00036                      | 306621                                                      | 49671                                                  | 20059                                             |
| 10-14     | 0.00034                      | 328460                                                      | 53513                                                  | 14762                                             |
| 15-19     | 0.00167                      | 340495                                                      | 27975                                                  | 7194                                              |
| 20-24     | 0.00341                      | 257326                                                      | 48118                                                  | 16214                                             |
| 25-29     | 0.00337                      | 193447                                                      | 77497                                                  | 17747                                             |
| 30-34     | 0.00323                      | 130546                                                      | 98382                                                  | 26488                                             |
| 35-39     | 0.00309                      | 131476                                                      | 105947                                                 | 31273                                             |
| 40-44     | 0.00336                      | 122631                                                      | 112025                                                 | 28503                                             |
| 45-49     | 0.00443                      | 102487                                                      | 94643                                                  | 24576                                             |
| 50-54     | 0.00641                      | 79070                                                       | 80611                                                  | 19511                                             |
| 55-59     | 0.00895                      | 56890                                                       | 56368                                                  | 23487                                             |

† Values used in this table are for the urban population

<sup>1</sup> Initial value used in the stock of not-overweight population in 2005.

<sup>2</sup> Initial value used in the stock of overweight population in 2005.

<sup>3</sup> Initial value used in the stock of obese population in 2005.

**Table 68. Mortality rates for women and population size by age group without segregate by socioeconomic status (Central region)†**

| Age group | Mortality rates (R) (%/year) Female | Not- overweight women in 2005 (Number of people) <sup>1</sup> | Overweight women in 2005 (Number of people) <sup>2</sup> | Obese women in 2005 (Number of people) <sup>3</sup> |
|-----------|-------------------------------------|---------------------------------------------------------------|----------------------------------------------------------|-----------------------------------------------------|
| 0-4       | 0.00261                             | 268792                                                        | 58154                                                    | 16485                                               |
| 5-9       | 0.00024                             | 299977                                                        | 51300                                                    | 13042                                               |
| 10-14     | 0.00023                             | 319572                                                        | 48876                                                    | 17858                                               |
| 15-19     | 0.00047                             | 320020                                                        | 50787                                                    | 11014                                               |
| 20-24     | 0.00067                             | 267929                                                        | 60053                                                    | 19248                                               |
| 25-29     | 0.00058                             | 211777                                                        | 76719                                                    | 29169                                               |
| 30-34     | 0.00087                             | 161027                                                        | 92232                                                    | 35910                                               |
| 35-39     | 0.00113                             | 148473                                                        | 110885                                                   | 51120                                               |
| 40-44     | 0.00148                             | 134466                                                        | 111722                                                   | 57856                                               |
| 45-49     | 0.00232                             | 87754                                                         | 104080                                                   | 68366                                               |
| 50-54     | 0.00343                             | 58805                                                         | 88035                                                    | 62932                                               |
| 55-59     | 0.00585                             | 47432                                                         | 68897                                                    | 46047                                               |

† Values used in this table are for the urban population

<sup>1</sup> Initial value used in the stock of not-overweight population in 2005.

<sup>2</sup> Initial value used in the stock of overweight population in 2005.

<sup>3</sup> Initial value used in the stock of obese population in 2005.

**Table 69. Man mortality rates and population size by age group for the lower socioeconomic status population (Central region) †**

| Age group | Mortality rates (R) (%/year) | Not- overweight men in 2005 (Number of people) <sup>1</sup> | Overweight men in 2005 (Number of people) <sup>2</sup> | Obese men in 2005 (Number of people) <sup>3</sup> |
|-----------|------------------------------|-------------------------------------------------------------|--------------------------------------------------------|---------------------------------------------------|
| 0-4       | 0.00324                      | 83302                                                       | 18167                                                  | 5317                                              |
| 5-9       | 0.00036                      | 61133                                                       | 9552                                                   | 1910                                              |
| 10-14     | 0.00034                      | 71966                                                       | 9226                                                   | 923                                               |
| 15-19     | 0.00167                      | 71136                                                       | 3996                                                   | 0                                                 |
| 20-24     | 0.00341                      | 48641                                                       | 3661                                                   | 3138                                              |
| 25-29     | 0.00337                      | 43777                                                       | 13015                                                  | 1183                                              |
| 30-34     | 0.00323                      | 26488                                                       | 11352                                                  | 3784                                              |
| 35-39     | 0.00309                      | 29997                                                       | 8935                                                   | 3191                                              |
| 40-44     | 0.00336                      | 26515                                                       | 10606                                                  | 2651                                              |
| 45-49     | 0.00443                      | 21961                                                       | 15164                                                  | 1569                                              |
| 50-54     | 0.00641                      | 20024                                                       | 13863                                                  | 513                                               |
| 55-59     | 0.00895                      | 16702                                                       | 8873                                                   | 3132                                              |

†Values used in this table are for the urban population

<sup>1</sup> Initial value used in the stock of not-overweight population in 2005 for lower SES.

<sup>2</sup> Initial value used in the stock of overweight population in 2005 for lower SES.

<sup>3</sup> Initial value used in the stock of obese population in 2005 for lower SES.

**Table 70. Women mortality rates and population size by age group for the lower socioeconomic status population (Central region) †**

| Age group | Mortality rates (R) (%/year) | Not- overweight women in 2005 (Number of people) <sup>1</sup> | Overweight women in 2005 (Number of people) <sup>2</sup> | Obese women in 2005 (Number of people) <sup>3</sup> |
|-----------|------------------------------|---------------------------------------------------------------|----------------------------------------------------------|-----------------------------------------------------|
| 0-4       | 0.00261                      | 86404                                                         | 13998                                                    | 2414                                                |
| 5-9       | 0.00024                      | 60354                                                         | 9094                                                     | 827                                                 |
| 10-14     | 0.00023                      | 69562                                                         | 7996                                                     | 2399                                                |
| 15-19     | 0.00047                      | 62157                                                         | 13615                                                    | 592                                                 |
| 20-24     | 0.00067                      | 46278                                                         | 9743                                                     | 3827                                                |
| 25-29     | 0.00058                      | 41278                                                         | 14541                                                    | 7974                                                |
| 30-34     | 0.00087                      | 24374                                                         | 18525                                                    | 4225                                                |
| 35-39     | 0.00113                      | 18610                                                         | 20042                                                    | 10021                                               |
| 40-44     | 0.00148                      | 16790                                                         | 15464                                                    | 13697                                               |
| 45-49     | 0.00232                      | 18841                                                         | 19807                                                    | 6764                                                |
| 50-54     | 0.00343                      | 16532                                                         | 13989                                                    | 9750                                                |
| 55-59     | 0.00585                      | 14844                                                         | 9896                                                     | 9346                                                |

†Values used in this table are for the urban population

<sup>1</sup> Initial value used in the stock of not-overweight population in 2005 for lower SES.

<sup>2</sup> Initial value used in the stock of overweight population in 2005 for lower SES.

<sup>3</sup> Initial value used in the stock of obese population in 2005 for lower SES.

**Table 71. Man mortality rates and population size by age group for the middle socioeconomic status population (Central region) †**

| Age group | Mortality rates (R) (%/year) | Not- overweight men in 2005 (Number of people) <sup>1</sup> | Overweight men in 2005 (Number of people) <sup>2</sup> | Obese men in 2005 (Number of people) <sup>3</sup> |
|-----------|------------------------------|-------------------------------------------------------------|--------------------------------------------------------|---------------------------------------------------|
| 0-4       | 0.00324                      | 90392                                                       | 18610                                                  | 7976                                              |

|       |         |        |       |      |
|-------|---------|--------|-------|------|
| 5-9   | 0.00036 | 106983 | 15283 | 6686 |
| 10-14 | 0.00034 | 114407 | 15685 | 4613 |
| 15-19 | 0.00167 | 93516  | 9591  | 2398 |
| 20-24 | 0.00341 | 77930  | 7322  | 4707 |
| 25-29 | 0.00337 | 56792  | 16564 | 5324 |
| 30-34 | 0.00323 | 46038  | 27749 | 6307 |
| 35-39 | 0.00309 | 39570  | 32550 | 7659 |
| 40-44 | 0.00336 | 39109  | 30492 | 5966 |
| 45-49 | 0.00443 | 31373  | 19870 | 7320 |
| 50-54 | 0.00641 | 21051  | 15917 | 3081 |
| 55-59 | 0.00895 | 13570  | 11482 | 3653 |

†Values used in this table are for the urban population

1 Initial value used in the stock of not-overweight population in 2005 for middle SES.

2 Initial value used in the stock of overweight population in 2005 for middle SES.

3 Initial value used in the stock of obese population in 2005 for middle SES.

**Table 72. Women mortality rates and population size by age group for the middle socioeconomic status population (Central region) †**

| Age group | Mortality rates (R) (%/year) | Not- overweight women in 2005 (Number of people) <sup>1</sup> | Overweight women in 2005 (Number of people) <sup>2</sup> | Obese women in 2005 (Number of people) <sup>3</sup> |
|-----------|------------------------------|---------------------------------------------------------------|----------------------------------------------------------|-----------------------------------------------------|
| 0-4       | 0.00261                      | 84588                                                         | 20563                                                    | 7477                                                |
| 5-9       | 0.00024                      | 104946                                                        | 13256                                                    | 6628                                                |
| 10-14     | 0.00023                      | 110178                                                        | 16789                                                    | 4197                                                |
| 15-19     | 0.00047                      | 93439                                                         | 10661                                                    | 3136                                                |
| 20-24     | 0.00067                      | 73115                                                         | 17623                                                    | 6374                                                |
| 25-29     | 0.00058                      | 54484                                                         | 22764                                                    | 9329                                                |
| 30-34     | 0.00087                      | 41817                                                         | 33454                                                    | 15406                                               |
| 35-39     | 0.00113                      | 43211                                                         | 31688                                                    | 17285                                               |
| 40-44     | 0.00148                      | 33507                                                         | 35867                                                    | 17933                                               |
| 45-49     | 0.00232                      | 19271                                                         | 32118                                                    | 17344                                               |
| 50-54     | 0.00343                      | 11638                                                         | 17955                                                    | 17290                                               |
| 55-59     | 0.00585                      | 9985                                                          | 14461                                                    | 9641                                                |

†Values used in this table are for the urban population

1 Initial value used in the stock of not-overweight population in 2005 for middle SES.

2 Initial value used in the stock of overweight population in 2005 for middle SES.

3 Initial value used in the stock of obese population in 2005 for middle SES.

**Table 73. Man mortality rates and population size by age group for the higher socioeconomic status population (Central region) †**

| Age group | Mortality rates (R) (%/year) | Not- overweight men in 2005 (Number of people) <sup>1</sup> | Overweight men in 2005 (Number of people) <sup>2</sup> | Obese men in 2005 (Number of people) <sup>3</sup> |
|-----------|------------------------------|-------------------------------------------------------------|--------------------------------------------------------|---------------------------------------------------|
| 0-4       | 0.00324                      | 100140                                                      | 23041                                                  | 9748                                              |
| 5-9       | 0.00036                      | 138505                                                      | 24835                                                  | 11462                                             |
| 10-14     | 0.00034                      | 142086                                                      | 28602                                                  | 9226                                              |
| 15-19     | 0.00167                      | 175843                                                      | 14387                                                  | 4796                                              |
| 20-24     | 0.00341                      | 130755                                                      | 37135                                                  | 8368                                              |
| 25-29     | 0.00337                      | 92878                                                       | 47918                                                  | 11240                                             |
| 30-34     | 0.00323                      | 58020                                                       | 59282                                                  | 16397                                             |
| 35-39     | 0.00309                      | 61909                                                       | 64462                                                  | 20423                                             |
| 40-44     | 0.00336                      | 57007                                                       | 70927                                                  | 19886                                             |
| 45-49     | 0.00443                      | 49152                                                       | 59610                                                  | 15687                                             |
| 50-54     | 0.00641                      | 37995                                                       | 50831                                                  | 15917                                             |
| 55-59     | 0.00895                      | 26618                                                       | 36013                                                  | 16702                                             |



†Values used in this table are for the urban population

<sup>1</sup> Initial value used in the stock of not-overweight population in 2005 for higher SES.

<sup>2</sup> Initial value used in the stock of overweight population in 2005 for higher SES.

<sup>3</sup> Initial value used in the stock of obese population in 2005 for higher SES.

**Table 74. Women mortality rates and population size by age group for the higher socioeconomic status population (Central region) †**

| Age group | Mortality rates (R) (%/year) | Not- overweight women in 2005 (Number of people) <sup>1</sup> | Overweight women in 2005 (Number of people) <sup>2</sup> | Obese women in 2005 (Number of people) <sup>3</sup> |
|-----------|------------------------------|---------------------------------------------------------------|----------------------------------------------------------|-----------------------------------------------------|
| 0-4       | 0.00261                      | 98152                                                         | 23349                                                    | 6486                                                |
| 5-9       | 0.00024                      | 135525                                                        | 27564                                                    | 6125                                                |
| 10-14     | 0.00023                      | 139395                                                        | 24488                                                    | 11302                                               |
| 15-19     | 0.00047                      | 164573                                                        | 26307                                                    | 7342                                                |
| 20-24     | 0.00067                      | 148662                                                        | 32722                                                    | 8887                                                |
| 25-29     | 0.00058                      | 115971                                                        | 39179                                                    | 12146                                               |
| 30-34     | 0.00087                      | 93599                                                         | 40584                                                    | 17184                                               |
| 35-39     | 0.00113                      | 86630                                                         | 58966                                                    | 24023                                               |
| 40-44     | 0.00148                      | 82324                                                         | 61021                                                    | 27441                                               |
| 45-49     | 0.00232                      | 50816                                                         | 52733                                                    | 42506                                               |
| 50-54     | 0.00343                      | 31802                                                         | 55407                                                    | 35408                                               |
| 55-59     | 0.00585                      | 24774                                                         | 42514                                                    | 26915                                               |

†Values used in this table are for the urban population

<sup>1</sup> Initial value used in the stock of not-overweight population in 2005 for higher SES.

<sup>2</sup> Initial value used in the stock of overweight population in 2005 for higher SES.

<sup>3</sup> Initial value used in the stock of obese population in 2005 for higher SES.

**Table 75. Data and projections of the Fertility rates by department and Region (Central region) †**

| Year | Fecundity Rate Depto 05 | Fecundity Rate Depto 17 | Fecundity Rate Depto 18 | Fecundity Rate Depto 41 | Fecundity Rate Depto 63 | Fecundity Rate Depto 66 | Fecundity Rate Depto 73 | Average Fecundity Rate |
|------|-------------------------|-------------------------|-------------------------|-------------------------|-------------------------|-------------------------|-------------------------|------------------------|
| 2005 | 2,2791                  | 2,3096                  | 3,5656                  | 3,048                   | 2,2861                  | 2,2055                  | 2,7673                  | 2,637                  |
| 2006 | 2,2484                  | 2,2824                  | 3,5004                  | 2,9805                  | 2,2624                  | 2,182                   | 2,7292                  | 2,598                  |
| 2007 | 2,2177                  | 2,2552                  | 3,4352                  | 2,913                   | 2,2387                  | 2,1585                  | 2,6911                  | 2,558                  |
| 2008 | 2,187                   | 2,228                   | 3,37                    | 2,8455                  | 2,215                   | 2,135                   | 2,653                   | 2,519                  |
| 2009 | 2,1731                  | 2,2103                  | 3,3165                  | 2,8008                  | 2,2021                  | 2,125                   | 2,6222                  | 2,493                  |
| 2010 | 2,1592                  | 2,1926                  | 3,263                   | 2,7561                  | 2,1892                  | 2,115                   | 2,5914                  | 2,467                  |
| 2011 | 2,1453                  | 2,1749                  | 3,2095                  | 2,7114                  | 2,1763                  | 2,105                   | 2,5606                  | 2,440                  |
| 2012 | 2,1314                  | 2,1572                  | 3,156                   | 2,6667                  | 2,1634                  | 2,095                   | 2,5298                  | 2,414                  |
| 2013 | 2,1175                  | 2,1395                  | 3,1025                  | 2,622                   | 2,1505                  | 2,085                   | 2,499                   | 2,388                  |
| 2014 | 2,1117                  | 2,13                    | 3,0638                  | 2,5956                  | 2,1439                  | 2,0809                  | 2,478                   | 2,372                  |
| 2015 | 2,1059                  | 2,1205                  | 3,0251                  | 2,5692                  | 2,1373                  | 2,0768                  | 2,457                   | 2,356                  |
| 2016 | 2,1001                  | 2,111                   | 2,9864                  | 2,5428                  | 2,1307                  | 2,0727                  | 2,436                   | 2,340                  |
| 2017 | 2,0943                  | 2,1015                  | 2,9477                  | 2,5164                  | 2,1241                  | 2,0686                  | 2,415                   | 2,324                  |
| 2018 | 2,0885                  | 2,092                   | 2,909                   | 2,49                    | 2,1175                  | 2,0645                  | 2,394                   | 2,308                  |
| 2019 | 2,0827                  | 2,0825                  | 2,8703                  | 2,4636                  | 2,1109                  | 2,0604                  | 2,373                   | 2,292                  |
| 2020 | 2,0769                  | 2,073                   | 2,8316                  | 2,4372                  | 2,1043                  | 2,0563                  | 2,352                   | 2,276                  |
| 2021 | 2,0711                  | 2,0635                  | 2,7929                  | 2,4108                  | 2,0977                  | 2,0522                  | 2,331                   | 2,260                  |

| Year | Fecundity Rate Depto 05 | Fecundity Rate Depto 17 | Fecundity Rate Depto 18 | Fecundity Rate Depto 41 | Fecundity Rate Depto 63 | Fecundity Rate Depto 66 | Fecundity Rate Depto 73 | Average Fecundity Rate |
|------|-------------------------|-------------------------|-------------------------|-------------------------|-------------------------|-------------------------|-------------------------|------------------------|
| 2022 | 2,0653                  | 2,054                   | 2,7542                  | 2,3844                  | 2,0911                  | 2,0481                  | 2,31                    | 2,244                  |
| 2023 | 2,0595                  | 2,0445                  | 2,7155                  | 2,358                   | 2,0845                  | 2,044                   | 2,289                   | 2,228                  |
| 2024 | 2,0537                  | 2,035                   | 2,6768                  | 2,3316                  | 2,0779                  | 2,0399                  | 2,268                   | 2,212                  |
| 2025 | 2,0479                  | 2,0255                  | 2,6381                  | 2,3052                  | 2,0713                  | 2,0358                  | 2,247                   | 2,196                  |
| 2026 | 2,0421                  | 2,016                   | 2,5994                  | 2,2788                  | 2,0647                  | 2,0317                  | 2,226                   | 2,180                  |
| 2027 | 2,0363                  | 2,0065                  | 2,5607                  | 2,2524                  | 2,0581                  | 2,0276                  | 2,205                   | 2,164                  |
| 2028 | 2,0305                  | 1,997                   | 2,522                   | 2,226                   | 2,0515                  | 2,0235                  | 2,184                   | 2,148                  |
| 2029 | 2,0247                  | 1,9875                  | 2,4833                  | 2,1996                  | 2,0449                  | 2,0194                  | 2,163                   | 2,132                  |
| 2030 | 2,0189                  | 1,978                   | 2,4446                  | 2,1732                  | 2,0383                  | 2,0153                  | 2,142                   | 2,116                  |

† Data of Fertility rate of DANE [1] was used to forecast the department's fertility rate from 2005 to 2030. Holt-Winters no seasonal method in EViews 5 (Quantitative Micro Software, LLC) was used to forecast the fertility rate. In the SD model we used data from 2005 to 2030 and the region fertility rate was calculated as the average of all departments' fertility rates.

**Table 76. Fraction of births by departments, body mass index category, and socioeconomic status (Central region) †**

| Population group |                | Lower SES (%/year) | Middle SES (%/year) | Higher SES (%/year) | Complete Urban Population (%/year) |
|------------------|----------------|--------------------|---------------------|---------------------|------------------------------------|
| Department 5     | Not-overweight | 84,62%             | 76,19%              | 75,76%              | 78,75%                             |
|                  | Overweight     | 7,69%              | 19,05%              | 21,21%              | 16,25%                             |
|                  | Obese          | 7,69%              | 4,76%               | 3,03%               | 5,00%                              |
| Department 17    | Not-overweight | 83,33%             | 100,00%             | 88,89%              | 89,58%                             |
|                  | Overweight     | 16,67%             | 0,00%               | 11,11%              | 10,42%                             |
|                  | Obese          | 0,00%              | 0,00%               | 0,00%               | 0,00%                              |
| Department 18    | Not-overweight | 83,33%             | 100,00%             | 88,89%              | 89,58%                             |
|                  | Overweight     | 16,67%             | 0,00%               | 11,11%              | 10,42%                             |
|                  | Obese          | 0,00%              | 0,00%               | 0,00%               | 0,00%                              |
| Department 41    | Not-overweight | 93,33%             | 100,00%             | 100,00%             | 97,78%                             |
|                  | Overweight     | 6,67%              | 0,00%               | 0,00%               | 2,22%                              |
|                  | Obese          | 0,00%              | 0,00%               | 0,00%               | 0,00%                              |
| Department 63    | Not-overweight | 100,00%            | 86,67%              | 72,22%              | 82,50%                             |
|                  | Overweight     | 0,00%              | 13,33%              | 16,67%              | 12,50%                             |
|                  | Obese          | 0,00%              | 0,00%               | 11,11%              | 5,00%                              |
| Department 66    | Not-overweight | 84,62%             | 76,19%              | 75,76%              | 78,75%                             |
|                  | Overweight     | 7,69%              | 19,05%              | 21,21%              | 16,25%                             |
|                  | Obese          | 7,69%              | 4,76%               | 3,03%               | 5,00%                              |
| Department 73    | Not-overweight | 60,00%             | 69,57%              | 76,47%              | 69,09%                             |
|                  | Overweight     | 33,33%             | 17,39%              | 23,53%              | 23,64%                             |
|                  | Obese          | 6,67%              | 13,04%              | 0,00%               | 7,27%                              |

† The fractions of births by each BMI category correspond to the prevalences by BMI category of children aged 0 to 12 months

**Table 77. Prevalent rates of entire population by age group, and body mass index category (Central region)**

| Departments   | Age group | Not- overweight in 2005 | Overweight in 2005 | Obese in 2005 | Not- overweight in 2010 | Overweight in 2010 | Obese in 2010 |
|---------------|-----------|-------------------------|--------------------|---------------|-------------------------|--------------------|---------------|
| Department 5  | 0-4       | 0.83732                 | 0.11005            | 0.05263       | 0.74096                 | 0.22139            | 0.03765       |
|               | 5-9       | 0.83732                 | 0.11005            | 0.05263       | 0.74119                 | 0.17751            | 0.08130       |
|               | 10-14     | 0.83691                 | 0.11159            | 0.05150       | 0.79765                 | 0.14941            | 0.05294       |
|               | 15-19     | 0.86711                 | 0.11628            | 0.01661       | 0.83252                 | 0.12136            | 0.04612       |
|               | 20-24     | 0.78987                 | 0.16456            | 0.04557       | 0.75272                 | 0.18750            | 0.05978       |
|               | 25-29     | 0.69325                 | 0.23926            | 0.06748       | 0.59807                 | 0.31672            | 0.08521       |
|               | 30-34     | 0.55319                 | 0.33333            | 0.11348       | 0.46724                 | 0.38276            | 0.15000       |
|               | 35-39     | 0.46687                 | 0.40060            | 0.13253       | 0.40039                 | 0.43195            | 0.16765       |
|               | 40-44     | 0.52381                 | 0.34603            | 0.13016       | 0.37862                 | 0.42935            | 0.19203       |
|               | 45-49     | 0.43949                 | 0.38854            | 0.17197       | 0.40541                 | 0.41261            | 0.18198       |
|               | 50-54     | 0.40249                 | 0.39834            | 0.19917       | 0.30097                 | 0.45243            | 0.24660       |
| 55-59         | 0.40113   | 0.39548                 | 0.20339            | 0.36705       | 0.39306                 | 0.23988            |               |
| Department 17 | 0-4       | 0.71724                 | 0.15172            | 0.13103       | 0.77470                 | 0.18972            | 0.03557       |
|               | 5-9       | 0.87671                 | 0.10959            | 0.01370       | 0.74859                 | 0.15254            | 0.09887       |
|               | 10-14     | 0.81707                 | 0.17073            | 0.01220       | 0.80000                 | 0.15802            | 0.04198       |
|               | 15-19     | 0.88462                 | 0.07692            | 0.03846       | 0.86190                 | 0.11429            | 0.02381       |
|               | 20-24     | 0.79167                 | 0.15476            | 0.05357       | 0.74845                 | 0.21118            | 0.04037       |
|               | 25-29     | 0.75000                 | 0.16379            | 0.08621       | 0.55918                 | 0.33061            | 0.11020       |
|               | 30-34     | 0.62185                 | 0.28571            | 0.09244       | 0.47917                 | 0.35000            | 0.17083       |
|               | 35-39     | 0.53623                 | 0.33333            | 0.13043       | 0.39922                 | 0.42248            | 0.17829       |
|               | 40-44     | 0.39695                 | 0.48855            | 0.11450       | 0.45588                 | 0.33824            | 0.20588       |
|               | 45-49     | 0.41818                 | 0.40000            | 0.18182       | 0.35985                 | 0.43939            | 0.20076       |
|               | 50-54     | 0.31068                 | 0.51456            | 0.17476       | 0.32031                 | 0.45703            | 0.22266       |
| 55-59         | 0.37624   | 0.34653                 | 0.27723            | 0.39791       | 0.37696                 | 0.22513            |               |
| Department 18 | 0-4       | 0.80702                 | 0.17105            | 0.02193       | 0.76923                 | 0.20000            | 0.03077       |
|               | 5-9       | 0.81579                 | 0.14474            | 0.03947       | 0.79252                 | 0.12925            | 0.07823       |
|               | 10-14     | 0.86765                 | 0.10294            | 0.02941       | 0.79016                 | 0.15410            | 0.05574       |
|               | 15-19     | 0.81188                 | 0.14851            | 0.03960       | 0.79839                 | 0.14919            | 0.05242       |
|               | 20-24     | 0.77640                 | 0.13043            | 0.09317       | 0.63291                 | 0.28481            | 0.08228       |
|               | 25-29     | 0.66400                 | 0.22400            | 0.11200       | 0.52542                 | 0.32203            | 0.15254       |
|               | 30-34     | 0.50420                 | 0.30252            | 0.19328       | 0.36000                 | 0.40571            | 0.23429       |
|               | 35-39     | 0.37647                 | 0.34118            | 0.28235       | 0.30469                 | 0.45313            | 0.24219       |
|               | 40-44     | 0.40476                 | 0.35714            | 0.23810       | 0.25197                 | 0.49606            | 0.25197       |
|               | 45-49     | 0.31169                 | 0.36364            | 0.32468       | 0.26667                 | 0.33333            | 0.40000       |
|               | 50-54     | 0.22667                 | 0.44000            | 0.33333       | 0.17355                 | 0.43802            | 0.38843       |
| 55-59         | 0.34043   | 0.34043                 | 0.31915            | 0.26250       | 0.38750                 | 0.35000            |               |
| Department 41 | 0-4       | 0.67130                 | 0.24074            | 0.08796       | 0.77959                 | 0.17551            | 0.04490       |
|               | 5-9       | 0.78571                 | 0.15873            | 0.05556       | 0.76015                 | 0.14391            | 0.09594       |
|               | 10-14     | 0.76316                 | 0.15789            | 0.07895       | 0.73256                 | 0.17442            | 0.09302       |
|               | 15-19     | 0.78992                 | 0.18487            | 0.02521       | 0.81227                 | 0.14440            | 0.04332       |
|               | 20-24     | 0.70000                 | 0.22500            | 0.07500       | 0.67347                 | 0.20408            | 0.12245       |
|               | 25-29     | 0.56115                 | 0.33813            | 0.10072       | 0.51445                 | 0.30636            | 0.17919       |
| 30-34         | 0.48428   | 0.40881                 | 0.10692            | 0.45882       | 0.34118                 | 0.20000            |               |

| Departments      | Age group | Not- overweight<br>in 2005 | Overweight<br>in 2005 | Obese in<br>2005 | Not- overweight<br>in 2010 | Overweight<br>in 2010 | Obese in<br>2010 |
|------------------|-----------|----------------------------|-----------------------|------------------|----------------------------|-----------------------|------------------|
|                  | 35-39     | 0.40816                    | 0.40816               | 0.18367          | 0.38571                    | 0.37143               | 0.24286          |
|                  | 40-44     | 0.33813                    | 0.45324               | 0.20863          | 0.25984                    | 0.39370               | 0.34646          |
|                  | 45-49     | 0.23881                    | 0.45522               | 0.30597          | 0.18978                    | 0.53285               | 0.27737          |
|                  | 50-54     | 0.26786                    | 0.43750               | 0.29464          | 0.20930                    | 0.47287               | 0.31783          |
|                  | 55-59     | 0.25000                    | 0.43750               | 0.31250          | 0.25000                    | 0.41667               | 0.33333          |
| Department<br>63 | 0-4       | 0.76531                    | 0.17347               | 0.06122          | 0.74093                    | 0.20984               | 0.04922          |
|                  | 5-9       | 0.75893                    | 0.19643               | 0.04464          | 0.78497                    | 0.13987               | 0.07516          |
|                  | 10-14     | 0.85470                    | 0.12821               | 0.01709          | 0.78261                    | 0.17202               | 0.04537          |
|                  | 15-19     | 0.90604                    | 0.06040               | 0.03356          | 0.83559                    | 0.12959               | 0.03482          |
|                  | 20-24     | 0.81702                    | 0.15319               | 0.02979          | 0.73990                    | 0.18939               | 0.07071          |
|                  | 25-29     | 0.65652                    | 0.28261               | 0.06087          | 0.54593                    | 0.33333               | 0.12073          |
|                  | 30-34     | 0.59172                    | 0.32544               | 0.08284          | 0.50000                    | 0.38050               | 0.11950          |
|                  | 35-39     | 0.51208                    | 0.35749               | 0.13043          | 0.43599                    | 0.39100               | 0.17301          |
|                  | 40-44     | 0.52404                    | 0.29327               | 0.18269          | 0.39106                    | 0.38547               | 0.22346          |
|                  | 45-49     | 0.41627                    | 0.41148               | 0.17225          | 0.36792                    | 0.43082               | 0.20126          |
| Department<br>66 | 50-54     | 0.37126                    | 0.43713               | 0.19162          | 0.34516                    | 0.39677               | 0.25806          |
|                  | 55-59     | 0.30370                    | 0.47407               | 0.22222          | 0.30000                    | 0.41071               | 0.28929          |
|                  | 0-4       | 0.76531                    | 0.17347               | 0.06122          | 0.75146                    | 0.19298               | 0.05556          |
|                  | 5-9       | 0.75893                    | 0.19643               | 0.04464          | 0.75234                    | 0.15888               | 0.08879          |
|                  | 10-14     | 0.85470                    | 0.12821               | 0.01709          | 0.78959                    | 0.16742               | 0.04299          |
|                  | 15-19     | 0.90604                    | 0.06040               | 0.03356          | 0.85412                    | 0.11529               | 0.03059          |
|                  | 20-24     | 0.81702                    | 0.15319               | 0.02979          | 0.75068                    | 0.20000               | 0.04932          |
|                  | 25-29     | 0.65652                    | 0.28261               | 0.06087          | 0.60188                    | 0.28213               | 0.11599          |
|                  | 30-34     | 0.59172                    | 0.32544               | 0.08284          | 0.53974                    | 0.30795               | 0.15232          |
|                  | 35-39     | 0.51208                    | 0.35749               | 0.13043          | 0.47101                    | 0.38406               | 0.14493          |
| Department<br>73 | 40-44     | 0.52404                    | 0.29327               | 0.18269          | 0.42593                    | 0.41049               | 0.16358          |
|                  | 45-49     | 0.41627                    | 0.41148               | 0.17225          | 0.38276                    | 0.42759               | 0.18966          |
|                  | 50-54     | 0.37126                    | 0.43713               | 0.19162          | 0.36161                    | 0.41518               | 0.22321          |
|                  | 55-59     | 0.30841                    | 0.48598               | 0.20561          | 0.31579                    | 0.45175               | 0.23246          |
|                  | 0-4       | 0.67130                    | 0.24074               | 0.08796          | 0.72204                    | 0.20767               | 0.07029          |
|                  | 5-9       | 0.78571                    | 0.15873               | 0.05556          | 0.78593                    | 0.15596               | 0.05810          |
|                  | 10-14     | 0.76316                    | 0.15789               | 0.07895          | 0.78526                    | 0.16346               | 0.05128          |
|                  | 15-19     | 0.78992                    | 0.18487               | 0.02521          | 0.81961                    | 0.13725               | 0.04314          |
|                  | 20-24     | 0.70000                    | 0.22500               | 0.07500          | 0.67895                    | 0.22632               | 0.09474          |
|                  | 25-29     | 0.56115                    | 0.33813               | 0.10072          | 0.57222                    | 0.26667               | 0.16111          |
|                  | 30-34     | 0.48428                    | 0.40881               | 0.10692          | 0.38509                    | 0.39130               | 0.22360          |
|                  | 35-39     | 0.40816                    | 0.40816               | 0.18367          | 0.36496                    | 0.36496               | 0.27007          |
|                  | 40-44     | 0.33813                    | 0.45324               | 0.20863          | 0.34066                    | 0.45604               | 0.20330          |
|                  | 45-49     | 0.23881                    | 0.45522               | 0.30597          | 0.23913                    | 0.47826               | 0.28261          |
|                  | 50-54     | 0.26786                    | 0.43750               | 0.29464          | 0.23649                    | 0.44595               | 0.31757          |
|                  | 55-59     | 0.25000                    | 0.43750               | 0.31250          | 0.28682                    | 0.38760               | 0.32558          |

**Table 78. Prevalent rates of lower socioeconomic status population by age group, and body mass index category (Central region)**

| Departments   | Age group | Not- overweight in 2005 | Overweight in 2005 | Obese in 2005 | Not- overweight in 2010 | Overweight in 2010 | Obese in 2010 |
|---------------|-----------|-------------------------|--------------------|---------------|-------------------------|--------------------|---------------|
| Department 5  | 0-4       | 0.85294                 | 0.11765            | 0.02941       | 0.75978                 | 0.18994            | 0.05028       |
|               | 5-9       | 0.85294                 | 0.11765            | 0.02941       | 0.87425                 | 0.10778            | 0.01796       |
|               | 10-14     | 0.88235                 | 0.09804            | 0.01961       | 0.87166                 | 0.09626            | 0.03209       |
|               | 15-19     | 0.88406                 | 0.11594            | 0.00000       | 0.82609                 | 0.13043            | 0.04348       |
|               | 20-24     | 0.77778                 | 0.13889            | 0.08333       | 0.80000                 | 0.13600            | 0.06400       |
|               | 25-29     | 0.61404                 | 0.33333            | 0.05263       | 0.66337                 | 0.25743            | 0.07921       |
|               | 30-34     | 0.43902                 | 0.41463            | 0.14634       | 0.45745                 | 0.35106            | 0.19149       |
|               | 35-39     | 0.46939                 | 0.42857            | 0.10204       | 0.39241                 | 0.39241            | 0.21519       |
|               | 40-44     | 0.44000                 | 0.34000            | 0.22000       | 0.38667                 | 0.42667            | 0.18667       |
|               | 45-49     | 0.46000                 | 0.42000            | 0.12000       | 0.45714                 | 0.32857            | 0.21429       |
|               | 50-54     | 0.56522                 | 0.32609            | 0.10870       | 0.39655                 | 0.41379            | 0.18966       |
| 55-59         | 0.55556   | 0.25926                 | 0.18519            | 0.54902       | 0.33333                 | 0.11765            |               |
| Department 17 | 0-4       | 0.68421                 | 0.28947            | 0.02632       | 0.81538                 | 0.15385            | 0.03077       |
|               | 5-9       | 0.91667                 | 0.08333            | 0.00000       | 0.84158                 | 0.08911            | 0.06931       |
|               | 10-14     | 0.75000                 | 0.25000            | 0.00000       | 0.86735                 | 0.10204            | 0.03061       |
|               | 15-19     | 0.93750                 | 0.06250            | 0.00000       | 0.88372                 | 0.11628            | 0.00000       |
|               | 20-24     | 0.76000                 | 0.20000            | 0.04000       | 0.80822                 | 0.15068            | 0.04110       |
|               | 25-29     | 0.84000                 | 0.12000            | 0.04000       | 0.62791                 | 0.25581            | 0.11628       |
|               | 30-34     | 0.61111                 | 0.27778            | 0.11111       | 0.58696                 | 0.30435            | 0.10870       |
|               | 35-39     | 0.63158                 | 0.26316            | 0.10526       | 0.46000                 | 0.34000            | 0.20000       |
|               | 40-44     | 0.14286                 | 0.57143            | 0.28571       | 0.51020                 | 0.28571            | 0.20408       |
|               | 45-49     | 0.56000                 | 0.40000            | 0.04000       | 0.37500                 | 0.39583            | 0.22917       |
|               | 50-54     | 0.46154                 | 0.38462            | 0.15385       | 0.43182                 | 0.38636            | 0.18182       |
| 55-59         | 0.52381   | 0.19048                 | 0.28571            | 0.38710       | 0.35484                 | 0.25806            |               |
| Department 18 | 0-4       | 0.77778                 | 0.20000            | 0.02222       | 0.75362                 | 0.21014            | 0.03623       |
|               | 5-9       | 0.77273                 | 0.18182            | 0.04545       | 0.81646                 | 0.12658            | 0.05696       |
|               | 10-14     | 0.84000                 | 0.12000            | 0.04000       | 0.81395                 | 0.12791            | 0.05814       |
|               | 15-19     | 0.74074                 | 0.22222            | 0.03704       | 0.78358                 | 0.14925            | 0.06716       |
|               | 20-24     | 0.88000                 | 0.06000            | 0.06000       | 0.69118                 | 0.22059            | 0.08824       |
|               | 25-29     | 0.70000                 | 0.23333            | 0.06667       | 0.56250                 | 0.30000            | 0.13750       |
|               | 30-34     | 0.53125                 | 0.34375            | 0.12500       | 0.38947                 | 0.38947            | 0.22105       |
|               | 35-39     | 0.20000                 | 0.48000            | 0.32000       | 0.30159                 | 0.41270            | 0.28571       |
|               | 40-44     | 0.33333                 | 0.50000            | 0.16667       | 0.26923                 | 0.48077            | 0.25000       |
|               | 45-49     | 0.53846                 | 0.30769            | 0.15385       | 0.33333                 | 0.41667            | 0.25000       |
|               | 50-54     | 0.35000                 | 0.40000            | 0.25000       | 0.22951                 | 0.40984            | 0.36066       |
| 55-59         | 0.50000   | 0.35714                 | 0.14286            | 0.27273       | 0.48485                 | 0.24242            |               |
| Department 41 | 0-4       | 0.70769                 | 0.20000            | 0.09231       | 0.72308                 | 0.24615            | 0.03077       |
|               | 5-9       | 0.82609                 | 0.17391            | 0.00000       | 0.84211                 | 0.12281            | 0.03509       |
|               | 10-14     | 0.88889                 | 0.11111            | 0.00000       | 0.91667                 | 0.08333            | 0.00000       |
|               | 15-19     | 0.80769                 | 0.19231            | 0.00000       | 0.85714                 | 0.11905            | 0.02381       |
|               | 20-24     | 0.68966                 | 0.20690            | 0.10345       | 0.72222                 | 0.11111            | 0.16667       |
|               | 25-29     | 0.70370                 | 0.25926            | 0.03704       | 0.58621                 | 0.24138            | 0.17241       |
|               | 30-34     | 0.53333                 | 0.43333            | 0.03333       | 0.51613                 | 0.25806            | 0.22581       |
|               | 35-39     | 0.42105                 | 0.42105            | 0.15789       | 0.45000                 | 0.45000            | 0.10000       |
|               | 40-44     | 0.52941                 | 0.17647            | 0.29412       | 0.50000                 | 0.35714            | 0.14286       |

| Departments   | Age group | Not- overweight in 2005 | Overweight in 2005 | Obese in 2005 | Not- overweight in 2010 | Overweight in 2010 | Obese in 2010 |
|---------------|-----------|-------------------------|--------------------|---------------|-------------------------|--------------------|---------------|
|               | 45-49     | 0.29412                 | 0.58824            | 0.11765       | 0.25000                 | 0.50000            | 0.25000       |
|               | 50-54     | 0.26667                 | 0.53333            | 0.20000       | 0.14286                 | 0.57143            | 0.28571       |
|               | 55-59     | 0.45455                 | 0.27273            | 0.27273       | 0.35714                 | 0.14286            | 0.50000       |
| Department 63 | 0-4       | 0.92405                 | 0.05063            | 0.02532       | 0.77551                 | 0.16327            | 0.06122       |
|               | 5-9       | 0.87879                 | 0.12121            | 0.00000       | 0.85185                 | 0.09877            | 0.04938       |
|               | 10-14     | 0.96552                 | 0.03448            | 0.00000       | 0.85915                 | 0.11268            | 0.02817       |
|               | 15-19     | 0.87500                 | 0.12500            | 0.00000       | 0.87097                 | 0.11290            | 0.01613       |
|               | 20-24     | 0.89655                 | 0.10345            | 0.00000       | 0.77273                 | 0.22727            | 0.00000       |
|               | 25-29     | 0.63158                 | 0.23684            | 0.13158       | 0.59184                 | 0.30612            | 0.10204       |
|               | 30-34     | 0.59459                 | 0.35135            | 0.05405       | 0.55000                 | 0.35000            | 0.10000       |
|               | 35-39     | 0.58974                 | 0.28205            | 0.12821       | 0.51429                 | 0.37143            | 0.11429       |
|               | 40-44     | 0.43478                 | 0.26087            | 0.30435       | 0.45000                 | 0.35000            | 0.20000       |
|               | 45-49     | 0.45000                 | 0.45000            | 0.10000       | 0.41176                 | 0.35294            | 0.23529       |
|               | 50-54     | 0.54545                 | 0.36364            | 0.09091       | 0.43478                 | 0.30435            | 0.26087       |
|               | 55-59     | 0.28571                 | 0.42857            | 0.28571       | 0.42308                 | 0.30769            | 0.26923       |
| Department 66 | 0-4       | 0.92405                 | 0.05063            | 0.02532       | 0.78873                 | 0.18310            | 0.02817       |
|               | 5-9       | 0.87879                 | 0.12121            | 0.00000       | 0.83750                 | 0.12500            | 0.03750       |
|               | 10-14     | 0.96552                 | 0.03448            | 0.00000       | 0.92754                 | 0.07246            | 0.00000       |
|               | 15-19     | 0.87500                 | 0.12500            | 0.00000       | 0.86207                 | 0.10345            | 0.03448       |
|               | 20-24     | 0.89655                 | 0.10345            | 0.00000       | 0.77358                 | 0.15094            | 0.07547       |
|               | 25-29     | 0.63158                 | 0.23684            | 0.13158       | 0.67442                 | 0.23256            | 0.09302       |
|               | 30-34     | 0.59459                 | 0.35135            | 0.05405       | 0.65116                 | 0.20930            | 0.13953       |
|               | 35-39     | 0.58974                 | 0.28205            | 0.12821       | 0.58065                 | 0.35484            | 0.06452       |
|               | 40-44     | 0.43478                 | 0.26087            | 0.30435       | 0.61765                 | 0.32353            | 0.05882       |
|               | 45-49     | 0.45000                 | 0.45000            | 0.10000       | 0.50000                 | 0.30000            | 0.20000       |
|               | 50-54     | 0.54545                 | 0.36364            | 0.09091       | 0.57143                 | 0.33333            | 0.09524       |
|               | 55-59     | 0.28571                 | 0.42857            | 0.28571       | 0.43478                 | 0.43478            | 0.13043       |
| Department 73 | 0-4       | 0.70769                 | 0.20000            | 0.09231       | 0.73034                 | 0.19101            | 0.07865       |
|               | 5-9       | 0.82609                 | 0.17391            | 0.00000       | 0.85714                 | 0.10989            | 0.03297       |
|               | 10-14     | 0.88889                 | 0.11111            | 0.00000       | 0.83824                 | 0.11765            | 0.04412       |
|               | 15-19     | 0.80769                 | 0.19231            | 0.00000       | 0.81818                 | 0.16364            | 0.01818       |
|               | 20-24     | 0.68966                 | 0.20690            | 0.10345       | 0.67500                 | 0.17500            | 0.15000       |
|               | 25-29     | 0.70370                 | 0.25926            | 0.03704       | 0.68182                 | 0.11364            | 0.20455       |
|               | 30-34     | 0.53333                 | 0.43333            | 0.03333       | 0.44828                 | 0.34483            | 0.20690       |
|               | 35-39     | 0.42105                 | 0.42105            | 0.15789       | 0.46875                 | 0.25000            | 0.28125       |
|               | 40-44     | 0.52941                 | 0.17647            | 0.29412       | 0.31034                 | 0.27586            | 0.41379       |
|               | 45-49     | 0.29412                 | 0.58824            | 0.11765       | 0.45161                 | 0.38710            | 0.16129       |
|               | 50-54     | 0.26667                 | 0.53333            | 0.20000       | 0.28125                 | 0.43750            | 0.28125       |
|               | 55-59     | 0.45455                 | 0.27273            | 0.27273       | 0.50000                 | 0.27778            | 0.22222       |

**Table 79. Prevalent rates of middle socioeconomic status population by age group, and body mass index category (Central region)**

| Departments  | Age group | Not- overweight in 2005 | Overweight in 2005 | Obese in 2005 | Not- overweight in 2010 | Overweight in 2010 | Obese in 2010 |
|--------------|-----------|-------------------------|--------------------|---------------|-------------------------|--------------------|---------------|
| Department 5 | 0-4       | 0.85294                 | 0.11765            | 0.02941       | 0.72464                 | 0.26570            | 0.00966       |
|              | 5-9       | 0.85294                 | 0.11765            | 0.02941       | 0.72566                 | 0.18142            | 0.09292       |

| Departments   | Age group | Not- overweight in 2005 | Overweight in 2005 | Obese in 2005 | Not- overweight in 2010 | Overweight in 2010 | Obese in 2010 |
|---------------|-----------|-------------------------|--------------------|---------------|-------------------------|--------------------|---------------|
|               | 10-14     | 0.88235                 | 0.09804            | 0.01961       | 0.82022                 | 0.13483            | 0.04494       |
|               | 15-19     | 0.88406                 | 0.11594            | 0.00000       | 0.85774                 | 0.09623            | 0.04603       |
|               | 20-24     | 0.77778                 | 0.13889            | 0.08333       | 0.78509                 | 0.17544            | 0.03947       |
|               | 25-29     | 0.61404                 | 0.33333            | 0.05263       | 0.59896                 | 0.31250            | 0.08854       |
|               | 30-34     | 0.43902                 | 0.41463            | 0.14634       | 0.42623                 | 0.42623            | 0.14754       |
|               | 35-39     | 0.46939                 | 0.42857            | 0.10204       | 0.47682                 | 0.37748            | 0.14570       |
|               | 40-44     | 0.44000                 | 0.34000            | 0.22000       | 0.36306                 | 0.35032            | 0.28662       |
|               | 45-49     | 0.46000                 | 0.42000            | 0.12000       | 0.42857                 | 0.39456            | 0.17687       |
|               | 50-54     | 0.56522                 | 0.32609            | 0.10870       | 0.29861                 | 0.44444            | 0.25694       |
|               | 55-59     | 0.55556                 | 0.25926            | 0.18519       | 0.35526                 | 0.39474            | 0.25000       |
| Department 17 | 0-4       | 0.69231                 | 0.15385            | 0.15385       | 0.73034                 | 0.22472            | 0.04494       |
|               | 5-9       | 0.84000                 | 0.16000            | 0.00000       | 0.79439                 | 0.14019            | 0.06542       |
|               | 10-14     | 0.82143                 | 0.17857            | 0.00000       | 0.83471                 | 0.10744            | 0.05785       |
|               | 15-19     | 0.88000                 | 0.08000            | 0.04000       | 0.84559                 | 0.11765            | 0.03676       |
|               | 20-24     | 0.84783                 | 0.10870            | 0.04348       | 0.71765                 | 0.20000            | 0.08235       |
|               | 25-29     | 0.74194                 | 0.19355            | 0.06452       | 0.48684                 | 0.35526            | 0.15789       |
|               | 30-34     | 0.63636                 | 0.30303            | 0.06061       | 0.47826                 | 0.33696            | 0.18478       |
|               | 35-39     | 0.50000                 | 0.44444            | 0.05556       | 0.36364                 | 0.38961            | 0.24675       |
|               | 40-44     | 0.34483                 | 0.55172            | 0.10345       | 0.43590                 | 0.38462            | 0.17949       |
|               | 45-49     | 0.40000                 | 0.51429            | 0.08571       | 0.33766                 | 0.46753            | 0.19481       |
| Department 18 | 0-4       | 0.77778                 | 0.20000            | 0.02222       | 0.79048                 | 0.19048            | 0.01905       |
|               | 5-9       | 0.77273                 | 0.18182            | 0.04545       | 0.77273                 | 0.14545            | 0.08182       |
|               | 10-14     | 0.84000                 | 0.12000            | 0.04000       | 0.77679                 | 0.16964            | 0.05357       |
|               | 15-19     | 0.74074                 | 0.22222            | 0.03704       | 0.81395                 | 0.16279            | 0.02326       |
|               | 20-24     | 0.88000                 | 0.06000            | 0.06000       | 0.67164                 | 0.25373            | 0.07463       |
|               | 25-29     | 0.70000                 | 0.23333            | 0.06667       | 0.47945                 | 0.34247            | 0.17808       |
|               | 30-34     | 0.53125                 | 0.34375            | 0.12500       | 0.32258                 | 0.43548            | 0.24194       |
|               | 35-39     | 0.20000                 | 0.48000            | 0.32000       | 0.32692                 | 0.48077            | 0.19231       |
|               | 40-44     | 0.33333                 | 0.50000            | 0.16667       | 0.28070                 | 0.50877            | 0.21053       |
|               | 45-49     | 0.53846                 | 0.30769            | 0.15385       | 0.24074                 | 0.31481            | 0.44444       |
| Department 41 | 0-4       | 0.70769                 | 0.20000            | 0.09231       | 0.78571                 | 0.14286            | 0.07143       |
|               | 5-9       | 0.82609                 | 0.17391            | 0.00000       | 0.78641                 | 0.11650            | 0.09709       |
|               | 10-14     | 0.88889                 | 0.11111            | 0.00000       | 0.70297                 | 0.18812            | 0.10891       |
|               | 15-19     | 0.80769                 | 0.19231            | 0.00000       | 0.73636                 | 0.19091            | 0.07273       |
|               | 20-24     | 0.68966                 | 0.20690            | 0.10345       | 0.62791                 | 0.24419            | 0.12791       |
|               | 25-29     | 0.70370                 | 0.25926            | 0.03704       | 0.56250                 | 0.25000            | 0.18750       |
|               | 30-34     | 0.53333                 | 0.43333            | 0.03333       | 0.44898                 | 0.32653            | 0.22449       |
|               | 35-39     | 0.42105                 | 0.42105            | 0.15789       | 0.27660                 | 0.42553            | 0.29787       |
|               | 40-44     | 0.52941                 | 0.17647            | 0.29412       | 0.18000                 | 0.42000            | 0.40000       |
|               | 45-49     | 0.29412                 | 0.58824            | 0.11765       | 0.19608                 | 0.52941            | 0.27451       |
|               | 50-54     | 0.26667                 | 0.53333            | 0.20000       | 0.22222                 | 0.51111            | 0.26667       |

| Departments   | Age group | Not- overweight in 2005 | Overweight in 2005 | Obese in 2005 | Not- overweight in 2010 | Overweight in 2010 | Obese in 2010 |
|---------------|-----------|-------------------------|--------------------|---------------|-------------------------|--------------------|---------------|
|               | 55-59     | 0.45455                 | 0.27273            | 0.27273       | 0.19231                 | 0.46154            | 0.34615       |
| Department 63 | 0-4       | 0.92405                 | 0.05063            | 0.02532       | 0.74684                 | 0.20886            | 0.04430       |
|               | 5-9       | 0.87879                 | 0.12121            | 0.00000       | 0.77895                 | 0.14211            | 0.07895       |
|               | 10-14     | 0.96552                 | 0.03448            | 0.00000       | 0.78713                 | 0.17327            | 0.03960       |
|               | 15-19     | 0.87500                 | 0.12500            | 0.00000       | 0.87647                 | 0.10588            | 0.01765       |
|               | 20-24     | 0.89655                 | 0.10345            | 0.00000       | 0.72727                 | 0.16970            | 0.10303       |
|               | 25-29     | 0.63158                 | 0.23684            | 0.13158       | 0.48905                 | 0.35766            | 0.15328       |
|               | 30-34     | 0.59459                 | 0.35135            | 0.05405       | 0.44860                 | 0.40187            | 0.14953       |
|               | 35-39     | 0.58974                 | 0.28205            | 0.12821       | 0.42718                 | 0.42718            | 0.14563       |
|               | 40-44     | 0.43478                 | 0.26087            | 0.30435       | 0.37719                 | 0.39474            | 0.22807       |
|               | 45-49     | 0.45000                 | 0.45000            | 0.10000       | 0.41837                 | 0.40816            | 0.17347       |
|               | 50-54     | 0.54545                 | 0.36364            | 0.09091       | 0.42353                 | 0.38824            | 0.18824       |
|               | 55-59     | 0.28571                 | 0.42857            | 0.28571       | 0.25000                 | 0.40278            | 0.34722       |
| Department 66 | 0-4       | 0.85294                 | 0.11765            | 0.02941       | 0.71901                 | 0.25620            | 0.02479       |
|               | 5-9       | 0.85294                 | 0.11765            | 0.02941       | 0.76471                 | 0.16340            | 0.07190       |
|               | 10-14     | 0.88235                 | 0.09804            | 0.01961       | 0.76433                 | 0.19745            | 0.03822       |
|               | 15-19     | 0.88406                 | 0.11594            | 0.00000       | 0.85385                 | 0.11538            | 0.03077       |
|               | 20-24     | 0.77778                 | 0.13889            | 0.08333       | 0.77692                 | 0.16154            | 0.06154       |
|               | 25-29     | 0.61404                 | 0.33333            | 0.05263       | 0.65217                 | 0.21739            | 0.13043       |
|               | 30-34     | 0.43902                 | 0.41463            | 0.14634       | 0.51515                 | 0.28283            | 0.20202       |
|               | 35-39     | 0.46939                 | 0.42857            | 0.10204       | 0.48515                 | 0.38614            | 0.12871       |
|               | 40-44     | 0.44000                 | 0.34000            | 0.22000       | 0.40230                 | 0.36782            | 0.22989       |
|               | 45-49     | 0.46000                 | 0.42000            | 0.12000       | 0.46988                 | 0.37349            | 0.15663       |
|               | 50-54     | 0.56522                 | 0.32609            | 0.10870       | 0.36145                 | 0.31325            | 0.32530       |
|               | 55-59     | 0.55556                 | 0.25926            | 0.18519       | 0.28788                 | 0.48485            | 0.22727       |
| Department 73 | 0-4       | 0.70769                 | 0.20000            | 0.09231       | 0.77600                 | 0.18400            | 0.04000       |
|               | 5-9       | 0.82609                 | 0.17391            | 0.00000       | 0.77273                 | 0.14545            | 0.08182       |
|               | 10-14     | 0.88889                 | 0.11111            | 0.00000       | 0.79630                 | 0.14815            | 0.05556       |
|               | 15-19     | 0.80769                 | 0.19231            | 0.00000       | 0.82051                 | 0.15385            | 0.02564       |
|               | 20-24     | 0.68966                 | 0.20690            | 0.10345       | 0.70000                 | 0.24286            | 0.05714       |
|               | 25-29     | 0.70370                 | 0.25926            | 0.03704       | 0.58824                 | 0.25490            | 0.15686       |
|               | 30-34     | 0.53333                 | 0.43333            | 0.03333       | 0.43103                 | 0.44828            | 0.12069       |
|               | 35-39     | 0.42105                 | 0.42105            | 0.15789       | 0.30769                 | 0.46154            | 0.23077       |
|               | 40-44     | 0.52941                 | 0.17647            | 0.29412       | 0.37288                 | 0.42373            | 0.20339       |
|               | 45-49     | 0.29412                 | 0.58824            | 0.11765       | 0.18966                 | 0.55172            | 0.25862       |
|               | 50-54     | 0.26667                 | 0.53333            | 0.20000       | 0.39286                 | 0.46429            | 0.14286       |
|               | 55-59     | 0.45455                 | 0.27273            | 0.27273       | 0.35000                 | 0.30000            | 0.35000       |

**Table 80. Prevalent rates of higher socioeconomic status population by age group, and body mass index category (Central region)**

| Departments  | Age group | Not- overweight in 2005 | Overweight in 2005 | Obese in 2005 | Not- overweight in 2010 | Overweight in 2010 | Obese in 2010 |
|--------------|-----------|-------------------------|--------------------|---------------|-------------------------|--------------------|---------------|
| Department 5 | 0-4       | 0.85294                 | 0.11765            | 0.02941       | 0.74101                 | 0.20863            | 0.05036       |
|              | 5-9       | 0.85294                 | 0.11765            | 0.02941       | 0.68696                 | 0.20870            | 0.10435       |
|              | 10-14     | 0.88235                 | 0.09804            | 0.01961       | 0.74747                 | 0.18434            | 0.06818       |



| Departments   | Age group | Not- overweight in 2005 | Overweight in 2005 | Obese in 2005 | Not- overweight in 2010 | Overweight in 2010 | Obese in 2010 |
|---------------|-----------|-------------------------|--------------------|---------------|-------------------------|--------------------|---------------|
|               | 15-19     | 0.88406                 | 0.11594            | 0.00000       | 0.82075                 | 0.13208            | 0.04717       |
|               | 20-24     | 0.77778                 | 0.13889            | 0.08333       | 0.71802                 | 0.21149            | 0.07050       |
|               | 25-29     | 0.61404                 | 0.33333            | 0.05263       | 0.57751                 | 0.33739            | 0.08511       |
|               | 30-34     | 0.43902                 | 0.41463            | 0.14634       | 0.49505                 | 0.36634            | 0.13861       |
|               | 35-39     | 0.46939                 | 0.42857            | 0.10204       | 0.36101                 | 0.47292            | 0.16606       |
|               | 40-44     | 0.44000                 | 0.34000            | 0.22000       | 0.38438                 | 0.46875            | 0.14688       |
|               | 45-49     | 0.46000                 | 0.42000            | 0.12000       | 0.38462                 | 0.43787            | 0.17751       |
|               | 50-54     | 0.56522                 | 0.32609            | 0.10870       | 0.28435                 | 0.46326            | 0.25240       |
|               | 55-59     | 0.55556                 | 0.25926            | 0.18519       | 0.32877                 | 0.40639            | 0.26484       |
| Department 17 | 0-4       | 0.76364                 | 0.05455            | 0.18182       | 0.78788                 | 0.18182            | 0.03030       |
|               | 5-9       | 0.88889                 | 0.08333            | 0.02778       | 0.65068                 | 0.20548            | 0.14384       |
|               | 10-14     | 0.82609                 | 0.15217            | 0.02174       | 0.74194                 | 0.22043            | 0.03763       |
|               | 15-19     | 0.88060                 | 0.07463            | 0.04478       | 0.86364                 | 0.11111            | 0.02525       |
|               | 20-24     | 0.77320                 | 0.16495            | 0.06186       | 0.73780                 | 0.24390            | 0.01829       |
|               | 25-29     | 0.71667                 | 0.16667            | 0.11667       | 0.57937                 | 0.34127            | 0.07937       |
|               | 30-34     | 0.61765                 | 0.27941            | 0.10294       | 0.43137                 | 0.38235            | 0.18627       |
|               | 35-39     | 0.53012                 | 0.30120            | 0.16867       | 0.39695                 | 0.47328            | 0.12977       |
|               | 40-44     | 0.43158                 | 0.46316            | 0.10526       | 0.44828                 | 0.33103            | 0.22069       |
|               | 45-49     | 0.39048                 | 0.36190            | 0.24762       | 0.36691                 | 0.43885            | 0.19424       |
| 50-54         | 0.29851   | 0.56716                 | 0.13433            | 0.32283       | 0.44094                 | 0.23622            |               |
| 55-59         | 0.31884   | 0.37681                 | 0.30435            | 0.34653       | 0.43564                 | 0.21782            |               |
| Department 18 | 0-4       | 0.77778                 | 0.20000            | 0.02222       | 0.76471                 | 0.17647            | 0.05882       |
|               | 5-9       | 0.77273                 | 0.18182            | 0.04545       | 0.73077                 | 0.07692            | 0.19231       |
|               | 10-14     | 0.84000                 | 0.12000            | 0.04000       | 0.66667                 | 0.28571            | 0.04762       |
|               | 15-19     | 0.74074                 | 0.22222            | 0.03704       | 0.82143                 | 0.10714            | 0.07143       |
|               | 20-24     | 0.88000                 | 0.06000            | 0.06000       | 0.34783                 | 0.56522            | 0.08696       |
|               | 25-29     | 0.70000                 | 0.23333            | 0.06667       | 0.54167                 | 0.33333            | 0.12500       |
|               | 30-34     | 0.53125                 | 0.34375            | 0.12500       | 0.33333                 | 0.38889            | 0.27778       |
|               | 35-39     | 0.20000                 | 0.48000            | 0.32000       | 0.23077                 | 0.53846            | 0.23077       |
|               | 40-44     | 0.33333                 | 0.50000            | 0.16667       | 0.11111                 | 0.50000            | 0.38889       |
|               | 45-49     | 0.53846                 | 0.30769            | 0.15385       | 0.20000                 | 0.20000            | 0.60000       |
| 50-54         | 0.35000   | 0.40000                 | 0.25000            | 0.22222       | 0.33333                 | 0.44444            |               |
| 55-59         | 0.50000   | 0.35714                 | 0.14286            | 0.14286       | 0.21429                 | 0.64286            |               |
| Department 41 | 0-4       | 0.70769                 | 0.20000            | 0.09231       | 0.81250                 | 0.15625            | 0.03125       |
|               | 5-9       | 0.82609                 | 0.17391            | 0.00000       | 0.69369                 | 0.18018            | 0.12613       |
|               | 10-14     | 0.88889                 | 0.11111            | 0.00000       | 0.67890                 | 0.20183            | 0.11927       |
|               | 15-19     | 0.80769                 | 0.19231            | 0.00000       | 0.86400                 | 0.11200            | 0.02400       |
|               | 20-24     | 0.68966                 | 0.20690            | 0.10345       | 0.70270                 | 0.20270            | 0.09459       |
|               | 25-29     | 0.70370                 | 0.25926            | 0.03704       | 0.45000                 | 0.37500            | 0.17500       |
|               | 30-34     | 0.53333                 | 0.43333            | 0.03333       | 0.44444                 | 0.37778            | 0.17778       |
|               | 35-39     | 0.42105                 | 0.42105            | 0.15789       | 0.43836                 | 0.31507            | 0.24658       |
|               | 40-44     | 0.52941                 | 0.17647            | 0.29412       | 0.26984                 | 0.38095            | 0.34921       |
|               | 45-49     | 0.29412                 | 0.58824            | 0.11765       | 0.17143                 | 0.54286            | 0.28571       |
| 50-54         | 0.26667   | 0.53333                 | 0.20000            | 0.21429       | 0.42857                 | 0.35714            |               |
| 55-59         | 0.45455   | 0.27273                 | 0.27273            | 0.25000       | 0.47727                 | 0.27273            |               |

| Departments   | Age group | Not- overweight in 2005 | Overweight in 2005 | Obese in 2005 | Not- overweight in 2010 | Overweight in 2010 | Obese in 2010 |
|---------------|-----------|-------------------------|--------------------|---------------|-------------------------|--------------------|---------------|
| Department 63 | 0-4       | 0.92405                 | 0.05063            | 0.02532       | 0.72626                 | 0.22346            | 0.05028       |
|               | 5-9       | 0.87879                 | 0.12121            | 0.00000       | 0.76442                 | 0.15385            | 0.08173       |
|               | 10-14     | 0.96552                 | 0.03448            | 0.00000       | 0.75781                 | 0.18750            | 0.05469       |
|               | 15-19     | 0.87500                 | 0.12500            | 0.00000       | 0.80351                 | 0.14737            | 0.04912       |
|               | 20-24     | 0.89655                 | 0.10345            | 0.00000       | 0.74332                 | 0.19786            | 0.05882       |
|               | 25-29     | 0.63158                 | 0.23684            | 0.13158       | 0.57436                 | 0.32308            | 0.10256       |
|               | 30-34     | 0.59459                 | 0.35135            | 0.05405       | 0.52047                 | 0.37427            | 0.10526       |
|               | 35-39     | 0.58974                 | 0.28205            | 0.12821       | 0.42384                 | 0.37086            | 0.20530       |
|               | 40-44     | 0.43478                 | 0.26087            | 0.30435       | 0.38725                 | 0.38725            | 0.22549       |
|               | 45-49     | 0.45000                 | 0.45000            | 0.10000       | 0.33333                 | 0.45699            | 0.20968       |
|               | 50-54     | 0.54545                 | 0.36364            | 0.09091       | 0.30198                 | 0.41089            | 0.28713       |
| 55-59         | 0.28571   | 0.42857                 | 0.28571            | 0.30220       | 0.42857                 | 0.26923            |               |
| Department 66 | 0-4       | 0.85294                 | 0.11765            | 0.02941       | 0.76000                 | 0.14667            | 0.09333       |
|               | 5-9       | 0.85294                 | 0.11765            | 0.02941       | 0.70769                 | 0.16923            | 0.12308       |
|               | 10-14     | 0.88235                 | 0.09804            | 0.01961       | 0.76389                 | 0.17593            | 0.06019       |
|               | 15-19     | 0.88406                 | 0.11594            | 0.00000       | 0.84519                 | 0.12552            | 0.02929       |
|               | 20-24     | 0.77778                 | 0.13889            | 0.08333       | 0.72527                 | 0.24176            | 0.03297       |
|               | 25-29     | 0.61404                 | 0.33333            | 0.05263       | 0.54658                 | 0.34161            | 0.11180       |
|               | 30-34     | 0.43902                 | 0.41463            | 0.14634       | 0.52500                 | 0.35000            | 0.12500       |
|               | 35-39     | 0.46939                 | 0.42857            | 0.10204       | 0.43750                 | 0.38889            | 0.17361       |
|               | 40-44     | 0.44000                 | 0.34000            | 0.22000       | 0.40394                 | 0.44335            | 0.15271       |
|               | 45-49     | 0.46000                 | 0.42000            | 0.12000       | 0.32203                 | 0.47458            | 0.20339       |
|               | 50-54     | 0.56522                 | 0.32609            | 0.10870       | 0.32500                 | 0.50000            | 0.17500       |
| 55-59         | 0.55556   | 0.25926                 | 0.18519            | 0.30935       | 0.43885                 | 0.25180            |               |
| Department 73 | 0-4       | 0.70769                 | 0.20000            | 0.09231       | 0.64646                 | 0.25253            | 0.10101       |
|               | 5-9       | 0.82609                 | 0.17391            | 0.00000       | 0.74603                 | 0.19841            | 0.05556       |
|               | 10-14     | 0.88889                 | 0.11111            | 0.00000       | 0.75000                 | 0.19853            | 0.05147       |
|               | 15-19     | 0.80769                 | 0.19231            | 0.00000       | 0.81967                 | 0.11475            | 0.06557       |
|               | 20-24     | 0.68966                 | 0.20690            | 0.10345       | 0.66250                 | 0.23750            | 0.10000       |
|               | 25-29     | 0.70370                 | 0.25926            | 0.03704       | 0.50588                 | 0.35294            | 0.14118       |
|               | 30-34     | 0.53333                 | 0.43333            | 0.03333       | 0.32432                 | 0.36486            | 0.31081       |
|               | 35-39     | 0.42105                 | 0.42105            | 0.15789       | 0.35849                 | 0.33962            | 0.30189       |
|               | 40-44     | 0.52941                 | 0.17647            | 0.29412       | 0.32979                 | 0.53191            | 0.13830       |
|               | 45-49     | 0.29412                 | 0.58824            | 0.11765       | 0.20000                 | 0.46316            | 0.33684       |
|               | 50-54     | 0.26667                 | 0.53333            | 0.20000       | 0.17045                 | 0.44318            | 0.38636       |
| 55-59         | 0.45455   | 0.27273                 | 0.27273            | 0.19718       | 0.46479                 | 0.33803            |               |

**Table 81. Mortality rates and population size by age group at the department level without segregate by socioeconomic status (Central region) †**

| Departments  | Age group | Mortality rates (R) (%/year) | Not- overweight population in 2005 (Number of people)1 | Overweight population in 2005 (Number of people)2 | Obese population in 2005 (Number of people)3 |
|--------------|-----------|------------------------------|--------------------------------------------------------|---------------------------------------------------|----------------------------------------------|
| Department 5 | 0-4       | 0.00274                      | 313033                                                 | 41141                                             | 19676                                        |
|              | 5-9       | 0.00027                      | 330678                                                 | 43461                                             | 20785                                        |

| Departments          | Age group | Mortality rates (R) (%/year) | Not-overweight population in 2005 (Number of people)1 | Overweight population in 2005 (Number of people)2 | Obese population in 2005 (Number of people)3 |
|----------------------|-----------|------------------------------|-------------------------------------------------------|---------------------------------------------------|----------------------------------------------|
|                      | 10-14     | 0.00029                      | 352571                                                | 47009                                             | 21697                                        |
|                      | 15-19     | 0.00091                      | 359035                                                | 48147                                             | 6878                                         |
|                      | 20-24     | 0.00172                      | 298127                                                | 62110                                             | 17200                                        |
|                      | 25-29     | 0.00166                      | 237491                                                | 81966                                             | 23119                                        |
|                      | 30-34     | 0.00160                      | 168734                                                | 101673                                            | 34612                                        |
|                      | 35-39     | 0.00179                      | 152801                                                | 131113                                            | 43376                                        |
|                      | 40-44     | 0.00203                      | 168341                                                | 111207                                            | 41830                                        |
|                      | 45-49     | 0.00307                      | 118544                                                | 104800                                            | 46387                                        |
|                      | 50-54     | 0.00449                      | 85783                                                 | 84899                                             | 42450                                        |
|                      | 55-59     | 0.00687                      | 65323                                                 | 64403                                             | 33122                                        |
| <b>Department 17</b> | 0-4       | 0.00272                      | 10355                                                 | 2190                                              | 1892                                         |
|                      | 5-9       | 0.00040                      | 8204                                                  | 1026                                              | 128                                          |
|                      | 10-14     | 0.00024                      | 5073                                                  | 1060                                              | 76                                           |
|                      | 15-19     | 0.00143                      | 8998                                                  | 782                                               | 391                                          |
|                      | 20-24     | 0.00266                      | 6387                                                  | 1249                                              | 432                                          |
|                      | 25-29     | 0.00229                      | 7836                                                  | 1711                                              | 901                                          |
|                      | 30-34     | 0.00277                      | 4181                                                  | 1921                                              | 621                                          |
|                      | 35-39     | 0.00248                      | 3637                                                  | 2261                                              | 885                                          |
|                      | 40-44     | 0.00277                      | 1027                                                  | 1264                                              | 296                                          |
|                      | 45-49     | 0.00360                      | 2766                                                  | 2646                                              | 1203                                         |
|                      | 50-54     | 0.00511                      | 1434                                                  | 2376                                              | 807                                          |
|                      | 55-59     | 0.00835                      | 2174                                                  | 2002                                              | 1602                                         |
| <b>Department 18</b> | 0-4       | 0.00441                      | 22523                                                 | 4774                                              | 612                                          |
|                      | 5-9       | 0.00029                      | 22289                                                 | 3955                                              | 1079                                         |
|                      | 10-14     | 0.00030                      | 22984                                                 | 2727                                              | 779                                          |
|                      | 15-19     | 0.00125                      | 20161                                                 | 3688                                              | 983                                          |
|                      | 20-24     | 0.00239                      | 16251                                                 | 2730                                              | 1950                                         |
|                      | 25-29     | 0.00378                      | 12118                                                 | 4088                                              | 2044                                         |
|                      | 30-34     | 0.00310                      | 7959                                                  | 4776                                              | 3051                                         |
|                      | 35-39     | 0.00213                      | 5832                                                  | 5285                                              | 4374                                         |
|                      | 40-44     | 0.00341                      | 5454                                                  | 4813                                              | 3208                                         |
|                      | 45-49     | 0.00291                      | 3321                                                  | 3875                                              | 3459                                         |
|                      | 50-54     | 0.00529                      | 1926                                                  | 3740                                              | 2833                                         |
|                      | 55-59     | 0.00910                      | 2170                                                  | 2170                                              | 2034                                         |
| <b>Department 41</b> | 0-4       | 0.00354                      | 18555                                                 | 2274                                              | 455                                          |
|                      | 5-9       | 0.00027                      | 15103                                                 | 2568                                              | 604                                          |
|                      | 10-14     | 0.00039                      | 12900                                                 | 1947                                              | 487                                          |
|                      | 15-19     | 0.00111                      | 10406                                                 | 1076                                              | 215                                          |
|                      | 20-24     | 0.00165                      | 6043                                                  | 1171                                              | 378                                          |
|                      | 25-29     | 0.00183                      | 7270                                                  | 2491                                              | 1077                                         |
|                      | 30-34     | 0.00200                      | 5049                                                  | 4081                                              | 1107                                         |
|                      | 35-39     | 0.00232                      | 4631                                                  | 3741                                              | 1306                                         |
|                      | 40-44     | 0.00257                      | 2634                                                  | 2634                                              | 1044                                         |

| Departments   | Age group | Mortality rates (R) (%/year) | Not-overweight population in 2005 (Number of people) <sup>1</sup> | Overweight population in 2005 (Number of people) <sup>2</sup> | Obese population in 2005 (Number of people) <sup>3</sup> |
|---------------|-----------|------------------------------|-------------------------------------------------------------------|---------------------------------------------------------------|----------------------------------------------------------|
|               | 45-49     | 0.00325                      | 1567                                                              | 2229                                                          | 906                                                      |
|               | 50-54     | 0.00462                      | 1450                                                              | 2248                                                          | 798                                                      |
|               | 55-59     | 0.00735                      | 577                                                               | 742                                                           | 350                                                      |
| Department 63 | 0-4       | 0.00254                      | 29774                                                             | 6749                                                          | 2382                                                     |
|               | 5-9       | 0.00026                      | 32091                                                             | 8306                                                          | 1888                                                     |
|               | 10-14     | 0.00020                      | 38770                                                             | 5816                                                          | 775                                                      |
|               | 15-19     | 0.00127                      | 37171                                                             | 2478                                                          | 1377                                                     |
|               | 20-24     | 0.00218                      | 29989                                                             | 5623                                                          | 1093                                                     |
|               | 25-29     | 0.00192                      | 22264                                                             | 9584                                                          | 2064                                                     |
|               | 30-34     | 0.00218                      | 18734                                                             | 10304                                                         | 2623                                                     |
|               | 35-39     | 0.00295                      | 17555                                                             | 12255                                                         | 4471                                                     |
|               | 40-44     | 0.00288                      | 17667                                                             | 9887                                                          | 6159                                                     |
|               | 45-49     | 0.00379                      | 12311                                                             | 12169                                                         | 5094                                                     |
|               | 50-54     | 0.00557                      | 9258                                                              | 10901                                                         | 4778                                                     |
| 55-59         | 0.00799   | 5967                         | 9315                                                              | 4366                                                          |                                                          |
| Department 66 | 0-4       | 0.00305                      | 43510                                                             | 10360                                                         | 3108                                                     |
|               | 5-9       | 0.00038                      | 52740                                                             | 6511                                                          | 3256                                                     |
|               | 10-14     | 0.00029                      | 54062                                                             | 9230                                                          | 3296                                                     |
|               | 15-19     | 0.00177                      | 55410                                                             | 6013                                                          | 1289                                                     |
|               | 20-24     | 0.00316                      | 46481                                                             | 9960                                                          | 3018                                                     |
|               | 25-29     | 0.00291                      | 36477                                                             | 14414                                                         | 3824                                                     |
|               | 30-34     | 0.00349                      | 25721                                                             | 15765                                                         | 6638                                                     |
|               | 35-39     | 0.00260                      | 27832                                                             | 16235                                                         | 6668                                                     |
|               | 40-44     | 0.00295                      | 19870                                                             | 22310                                                         | 7669                                                     |
|               | 45-49     | 0.00403                      | 16641                                                             | 16923                                                         | 10154                                                    |
|               | 50-54     | 0.00560                      | 12491                                                             | 12491                                                         | 11428                                                    |
| 55-59         | 0.00803   | 8113                         | 12930                                                             | 6845                                                          |                                                          |
| Department 73 | 0-4       | 0.00309                      | 56623                                                             | 20306                                                         | 7420                                                     |
|               | 5-9       | 0.00032                      | 70476                                                             | 14238                                                         | 4983                                                     |
|               | 10-14     | 0.00027                      | 71019                                                             | 14694                                                         | 7347                                                     |
|               | 15-19     | 0.00083                      | 68411                                                             | 16011                                                         | 2183                                                     |
|               | 20-24     | 0.00197                      | 47268                                                             | 15193                                                         | 5064                                                     |
|               | 25-29     | 0.00165                      | 35075                                                             | 21135                                                         | 6296                                                     |
|               | 30-34     | 0.00171                      | 28379                                                             | 23956                                                         | 6265                                                     |
|               | 35-39     | 0.00185                      | 25168                                                             | 25168                                                         | 11325                                                    |
|               | 40-44     | 0.00256                      | 21033                                                             | 28194                                                         | 12978                                                    |
|               | 45-49     | 0.00339                      | 12616                                                             | 24049                                                         | 16164                                                    |
|               | 50-54     | 0.00497                      | 11802                                                             | 19276                                                         | 12982                                                    |
| 55-59         | 0.00686   | 8816                         | 15428                                                             | 11020                                                         |                                                          |

<sup>†</sup>Values used in this table are for the urban population

<sup>1</sup> Initial value used in the stock of not-overweight population in 2005.

<sup>2</sup> Initial value used in the stock of overweight population in 2005.

<sup>3</sup> Initial value used in the stock of obese population in 2005.

**Table 82. Mortality rates and population size by age group at the department level for the lower socioeconomic status population (Central region) †**

| Departments   | Age group | Mortality rates (R) (%/year) | Not-overweight population in 2005 (Number of people)1 | Overweight population in 2005 (Number of people)2 | Obese population in 2005 (Number of people)3 |
|---------------|-----------|------------------------------|-------------------------------------------------------|---------------------------------------------------|----------------------------------------------|
| Department 5  | 0-4       | 0.00274                      | 51874                                                 | 7155                                              | 1789                                         |
|               | 5-9       | 0.00027                      | 54798                                                 | 7558                                              | 1890                                         |
|               | 10-14     | 0.00029                      | 81363                                                 | 9040                                              | 1808                                         |
|               | 15-19     | 0.00091                      | 82005                                                 | 10755                                             | 0                                            |
|               | 20-24     | 0.00172                      | 53510                                                 | 9555                                              | 5733                                         |
|               | 25-29     | 0.00166                      | 36780                                                 | 19966                                             | 3153                                         |
|               | 30-34     | 0.00160                      | 19469                                                 | 18388                                             | 6490                                         |
|               | 35-39     | 0.00179                      | 22674                                                 | 20702                                             | 4929                                         |
|               | 40-44     | 0.00203                      | 22445                                                 | 17344                                             | 11223                                        |
|               | 45-49     | 0.00307                      | 19757                                                 | 18039                                             | 5154                                         |
|               | 50-54     | 0.00449                      | 22993                                                 | 13265                                             | 4422                                         |
|               | 55-59     | 0.00687                      | 13801                                                 | 6440                                              | 4600                                         |
| Department 17 | 0-4       | 0.00272                      | 9878                                                  | 4179                                              | 380                                          |
|               | 5-9       | 0.00040                      | 8578                                                  | 780                                               | 0                                            |
|               | 10-14     | 0.00024                      | 4657                                                  | 1552                                              | 0                                            |
|               | 15-19     | 0.00143                      | 9536                                                  | 636                                               | 0                                            |
|               | 20-24     | 0.00266                      | 6131                                                  | 1613                                              | 323                                          |
|               | 25-29     | 0.00229                      | 8776                                                  | 1254                                              | 418                                          |
|               | 30-34     | 0.00277                      | 4109                                                  | 1868                                              | 747                                          |
|               | 35-39     | 0.00248                      | 4284                                                  | 1785                                              | 714                                          |
|               | 40-44     | 0.00277                      | 370                                                   | 1479                                              | 739                                          |
|               | 45-49     | 0.00360                      | 3705                                                  | 2646                                              | 265                                          |
|               | 50-54     | 0.00511                      | 2131                                                  | 1776                                              | 710                                          |
|               | 55-59     | 0.00835                      | 2167                                                  | 2167                                              | 1444                                         |
| Department 18 | 0-4       | 0.00441                      | 8569                                                  | 2203                                              | 245                                          |
|               | 5-9       | 0.00029                      | 6112                                                  | 1438                                              | 360                                          |
|               | 10-14     | 0.00030                      | 8181                                                  | 1169                                              | 390                                          |
|               | 15-19     | 0.00125                      | 4917                                                  | 1475                                              | 246                                          |
|               | 20-24     | 0.00239                      | 5720                                                  | 390                                               | 390                                          |
|               | 25-29     | 0.00378                      | 3066                                                  | 1022                                              | 292                                          |
|               | 30-34     | 0.00310                      | 2255                                                  | 1459                                              | 531                                          |
|               | 35-39     | 0.00213                      | 911                                                   | 2187                                              | 1458                                         |
|               | 40-44     | 0.00341                      | 963                                                   | 1444                                              | 481                                          |
|               | 45-49     | 0.00291                      | 969                                                   | 554                                               | 277                                          |
|               | 50-54     | 0.00529                      | 793                                                   | 907                                               | 567                                          |
|               | 55-59     | 0.00910                      | 949                                                   | 678                                               | 271                                          |
| Department 41 | 0-4       | 0.00354                      | 13426                                                 | 3794                                              | 1751                                         |
|               | 5-9       | 0.00027                      | 10104                                                 | 2127                                              | 0                                            |
|               | 10-14     | 0.00039                      | 9351                                                  | 1169                                              | 0                                            |
|               | 15-19     | 0.00111                      | 10515                                                 | 2504                                              | 0                                            |
|               | 20-24     | 0.00165                      | 6577                                                  | 1973                                              | 987                                          |

| Departments          | Age group | Mortality rates (R) (%/year) | Not-overweight population in 2005 (Number of people)1 | Overweight population in 2005 (Number of people)2 | Obese population in 2005 (Number of people)3 |
|----------------------|-----------|------------------------------|-------------------------------------------------------|---------------------------------------------------|----------------------------------------------|
|                      | 25-29     | 0.00183                      | 6277                                                  | 2312                                              | 330                                          |
|                      | 30-34     | 0.00200                      | 4120                                                  | 3348                                              | 258                                          |
|                      | 35-39     | 0.00232                      | 2201                                                  | 2201                                              | 826                                          |
|                      | 40-44     | 0.00257                      | 2470                                                  | 823                                               | 1372                                         |
|                      | 45-49     | 0.00325                      | 1184                                                  | 2369                                              | 474                                          |
|                      | 50-54     | 0.00462                      | 905                                                   | 1810                                              | 679                                          |
|                      | 55-59     | 0.00735                      | 1207                                                  | 724                                               | 724                                          |
| <b>Department 63</b> | 0-4       | 0.00254                      | 12137                                                 | 665                                               | 333                                          |
|                      | 5-9       | 0.00026                      | 10134                                                 | 1398                                              | 0                                            |
|                      | 10-14     | 0.00020                      | 10080                                                 | 360                                               | 0                                            |
|                      | 15-19     | 0.00127                      | 7047                                                  | 1007                                              | 0                                            |
|                      | 20-24     | 0.00218                      | 4748                                                  | 548                                               | 0                                            |
|                      | 25-29     | 0.00192                      | 5055                                                  | 1896                                              | 1053                                         |
|                      | 30-34     | 0.00218                      | 4706                                                  | 2781                                              | 428                                          |
|                      | 35-39     | 0.00295                      | 4837                                                  | 2313                                              | 1052                                         |
|                      | 40-44     | 0.00288                      | 2425                                                  | 1455                                              | 1698                                         |
|                      | 45-49     | 0.00379                      | 1972                                                  | 1972                                              | 438                                          |
|                      | 50-54     | 0.00557                      | 2413                                                  | 1609                                              | 402                                          |
|                      | 55-59     | 0.00799                      | 485                                                   | 728                                               | 485                                          |
| <b>Department 66</b> | 0-4       | 0.00305                      | 17775                                                 | 974                                               | 487                                          |
|                      | 5-9       | 0.00038                      | 14981                                                 | 2066                                              | 0                                            |
|                      | 10-14     | 0.00029                      | 14797                                                 | 528                                               | 0                                            |
|                      | 15-19     | 0.00177                      | 10773                                                 | 1539                                              | 0                                            |
|                      | 20-24     | 0.00316                      | 7691                                                  | 887                                               | 0                                            |
|                      | 25-29     | 0.00291                      | 8156                                                  | 3059                                              | 1699                                         |
|                      | 30-34     | 0.00349                      | 7154                                                  | 4227                                              | 650                                          |
|                      | 35-39     | 0.00260                      | 7159                                                  | 3424                                              | 1556                                         |
|                      | 40-44     | 0.00295                      | 3586                                                  | 2152                                              | 2510                                         |
|                      | 45-49     | 0.00403                      | 2915                                                  | 2915                                              | 648                                          |
|                      | 50-54     | 0.00560                      | 3524                                                  | 2349                                              | 587                                          |
|                      | 55-59     | 0.00803                      | 689                                                   | 1033                                              | 689                                          |
| <b>Department 73</b> | 0-4       | 0.00309                      | 17963                                                 | 5077                                              | 2343                                         |
|                      | 5-9       | 0.00032                      | 13526                                                 | 2848                                              | 0                                            |
|                      | 10-14     | 0.00027                      | 13061                                                 | 1633                                              | 0                                            |
|                      | 15-19     | 0.00083                      | 15283                                                 | 3639                                              | 0                                            |
|                      | 20-24     | 0.00197                      | 8441                                                  | 2532                                              | 1266                                         |
|                      | 25-29     | 0.00165                      | 8544                                                  | 3148                                              | 450                                          |
|                      | 30-34     | 0.00171                      | 5897                                                  | 4791                                              | 369                                          |
|                      | 35-39     | 0.00185                      | 3356                                                  | 3356                                              | 1258                                         |
|                      | 40-44     | 0.00256                      | 4028                                                  | 1343                                              | 2238                                         |
|                      | 45-49     | 0.00339                      | 1971                                                  | 3942                                              | 788                                          |
|                      | 50-54     | 0.00497                      | 1574                                                  | 3147                                              | 1180                                         |
|                      | 55-59     | 0.00686                      | 2204                                                  | 1322                                              | 1322                                         |

†Values used in this table are for the urban population

<sup>1</sup> Initial value used in the stock of not-overweight population in 2005 for lower SES.

<sup>2</sup> Initial value used in the stock of overweight population in 2005 for lower SES.

<sup>3</sup> Initial value used in the stock of obese population in 2005 for lower SES.

**Table 83. Mortality rates and population size by age group at the department level for the middle socioeconomic status population (Central region) †**

| Departments   | Age group | Mortality rates (R) (%/year) | Not-overweight population in 2005 (Number of people) <sup>1</sup> | Overweight population in 2005 (Number of people) <sup>2</sup> | Obese population in 2005 (Number of people) <sup>3</sup> |
|---------------|-----------|------------------------------|-------------------------------------------------------------------|---------------------------------------------------------------|----------------------------------------------------------|
| Department 5  | 0-4       | 0.00274                      | 70183                                                             | 9680                                                          | 2420                                                     |
|               | 5-9       | 0.00027                      | 74139                                                             | 10226                                                         | 2557                                                     |
|               | 10-14     | 0.00029                      | 90935                                                             | 10104                                                         | 2021                                                     |
|               | 15-19     | 0.00091                      | 79628                                                             | 10443                                                         | 0                                                        |
|               | 20-24     | 0.00172                      | 68374                                                             | 12210                                                         | 7326                                                     |
|               | 25-29     | 0.00166                      | 44523                                                             | 24169                                                         | 3816                                                     |
|               | 30-34     | 0.00160                      | 26592                                                             | 25115                                                         | 8864                                                     |
|               | 35-39     | 0.00179                      | 31928                                                             | 29152                                                         | 6941                                                     |
|               | 40-44     | 0.00203                      | 27832                                                             | 21507                                                         | 13916                                                    |
|               | 45-49     | 0.00307                      | 26870                                                             | 24533                                                         | 7010                                                     |
| Department 17 | 50-54     | 0.00449                      | 23993                                                             | 13842                                                         | 4614                                                     |
|               | 55-59     | 0.00687                      | 15334                                                             | 7156                                                          | 5111                                                     |
|               | 0-4       | 0.00272                      | 13677                                                             | 3039                                                          | 3039                                                     |
|               | 5-9       | 0.00040                      | 16377                                                             | 3119                                                          | 0                                                        |
|               | 10-14     | 0.00024                      | 17851                                                             | 3881                                                          | 0                                                        |
|               | 15-19     | 0.00143                      | 13987                                                             | 1272                                                          | 636                                                      |
|               | 20-24     | 0.00266                      | 12585                                                             | 1613                                                          | 645                                                      |
|               | 25-29     | 0.00229                      | 9612                                                              | 2507                                                          | 836                                                      |
|               | 30-34     | 0.00277                      | 7844                                                              | 3735                                                          | 747                                                      |
|               | 35-39     | 0.00248                      | 6426                                                              | 5712                                                          | 714                                                      |
| Department 18 | 40-44     | 0.00277                      | 3697                                                              | 5916                                                          | 1109                                                     |
|               | 45-49     | 0.00360                      | 3705                                                              | 4763                                                          | 794                                                      |
|               | 50-54     | 0.00511                      | 2131                                                              | 3552                                                          | 2486                                                     |
|               | 55-59     | 0.00835                      | 1376                                                              | 1376                                                          | 275                                                      |
|               | 0-4       | 0.00441                      | 7521                                                              | 1934                                                          | 215                                                      |
|               | 5-9       | 0.00029                      | 5834                                                              | 1373                                                          | 343                                                      |
|               | 10-14     | 0.00030                      | 8835                                                              | 1262                                                          | 421                                                      |
|               | 15-19     | 0.00125                      | 8014                                                              | 2404                                                          | 401                                                      |
|               | 20-24     | 0.00239                      | 6178                                                              | 421                                                           | 421                                                      |
|               | 25-29     | 0.00378                      | 4803                                                              | 1601                                                          | 457                                                      |
| 30-34         | 0.00310   | 2537                         | 1642                                                              | 597                                                           |                                                          |
| 35-39         | 0.00213   | 948                          | 2274                                                              | 1516                                                          |                                                          |
| 40-44         | 0.00341   | 1658                         | 2486                                                              | 829                                                           |                                                          |
| 45-49         | 0.00291   | 2757                         | 1575                                                              | 788                                                           |                                                          |
| 50-54         | 0.00529   | 833                          | 952                                                               | 595                                                           |                                                          |
| 55-59         | 0.00910   | 1424                         | 1017                                                              | 407                                                           |                                                          |

| Departments   | Age group | Mortality rates (R) (%/year) | Not-overweight population in 2005 (Number of people)1 | Overweight population in 2005 (Number of people)2 | Obese population in 2005 (Number of people)3 |
|---------------|-----------|------------------------------|-------------------------------------------------------|---------------------------------------------------|----------------------------------------------|
| Department 41 | 0-4       | 0.00354                      | 17557                                                 | 4962                                              | 2290                                         |
|               | 5-9       | 0.00027                      | 25481                                                 | 5364                                              | 0                                            |
|               | 10-14     | 0.00039                      | 24935                                                 | 3117                                              | 0                                            |
|               | 15-19     | 0.00111                      | 14559                                                 | 3467                                              | 0                                            |
|               | 20-24     | 0.00165                      | 13608                                                 | 4082                                              | 2041                                         |
|               | 25-29     | 0.00183                      | 13948                                                 | 5139                                              | 734                                          |
|               | 30-34     | 0.00200                      | 8378                                                  | 6807                                              | 524                                          |
|               | 35-39     | 0.00232                      | 6025                                                  | 6025                                              | 2259                                         |
|               | 40-44     | 0.00257                      | 8136                                                  | 2712                                              | 4520                                         |
|               | 45-49     | 0.00325                      | 3274                                                  | 6548                                              | 1310                                         |
|               | 50-54     | 0.00462                      | 2474                                                  | 4948                                              | 1855                                         |
|               | 55-59     | 0.00735                      | 2853                                                  | 1712                                              | 1712                                         |
| Department 63 | 0-4       | 0.00254                      | 11522                                                 | 631                                               | 316                                          |
|               | 5-9       | 0.00026                      | 11977                                                 | 1652                                              | 0                                            |
|               | 10-14     | 0.00020                      | 17727                                                 | 633                                               | 0                                            |
|               | 15-19     | 0.00127                      | 15196                                                 | 2171                                              | 0                                            |
|               | 20-24     | 0.00218                      | 12115                                                 | 1398                                              | 0                                            |
|               | 25-29     | 0.00192                      | 6918                                                  | 2594                                              | 1441                                         |
|               | 30-34     | 0.00218                      | 6105                                                  | 3608                                              | 555                                          |
|               | 35-39     | 0.00295                      | 7566                                                  | 3618                                              | 1645                                         |
|               | 40-44     | 0.00288                      | 4324                                                  | 2594                                              | 3027                                         |
|               | 45-49     | 0.00379                      | 4239                                                  | 4239                                              | 942                                          |
|               | 50-54     | 0.00557                      | 3291                                                  | 2194                                              | 548                                          |
|               | 55-59     | 0.00799                      | 1594                                                  | 2391                                              | 1594                                         |
| Department 66 | 0-4       | 0.00305                      | 15577                                                 | 2148                                              | 537                                          |
|               | 5-9       | 0.00038                      | 17184                                                 | 2370                                              | 593                                          |
|               | 10-14     | 0.00029                      | 23781                                                 | 2642                                              | 528                                          |
|               | 15-19     | 0.00177                      | 23469                                                 | 3078                                              | 0                                            |
|               | 20-24     | 0.00316                      | 17026                                                 | 3040                                              | 1824                                         |
|               | 25-29     | 0.00291                      | 10851                                                 | 5891                                              | 930                                          |
|               | 30-34     | 0.00349                      | 6852                                                  | 6472                                              | 2284                                         |
|               | 35-39     | 0.00260                      | 8912                                                  | 8137                                              | 1937                                         |
|               | 40-44     | 0.00295                      | 6470                                                  | 4999                                              | 3235                                         |
|               | 45-49     | 0.00403                      | 6406                                                  | 5849                                              | 1671                                         |
|               | 50-54     | 0.00560                      | 4979                                                  | 2873                                              | 958                                          |
|               | 55-59     | 0.00803                      | 4399                                                  | 2053                                              | 1466                                         |
| Department 73 | 0-4       | 0.00309                      | 23490                                                 | 6639                                              | 3064                                         |
|               | 5-9       | 0.00032                      | 34108                                                 | 7181                                              | 0                                            |
|               | 10-14     | 0.00027                      | 34829                                                 | 4354                                              | 0                                            |
|               | 15-19     | 0.00083                      | 21162                                                 | 5038                                              | 0                                            |
|               | 20-24     | 0.00197                      | 17463                                                 | 5239                                              | 2620                                         |
|               | 25-29     | 0.00165                      | 18987                                                 | 6995                                              | 999                                          |
|               | 30-34     | 0.00171                      | 11990                                                 | 9742                                              | 749                                          |
|               | 35-39     | 0.00185                      | 9184                                                  | 9184                                              | 3444                                         |



| Departments | Age group | Mortality rates (R) (%/year) | Not-overweight population in 2005 (Number of people) <sup>1</sup> | Overweight population in 2005 (Number of people) <sup>2</sup> | Obese population in 2005 (Number of people) <sup>3</sup> |
|-------------|-----------|------------------------------|-------------------------------------------------------------------|---------------------------------------------------------------|----------------------------------------------------------|
|             | 40-44     | 0.00256                      | 13268                                                             | 4423                                                          | 7371                                                     |
|             | 45-49     | 0.00339                      | 5450                                                              | 10900                                                         | 2180                                                     |
|             | 50-54     | 0.00497                      | 4301                                                              | 8602                                                          | 3226                                                     |
|             | 55-59     | 0.00686                      | 5209                                                              | 3126                                                          | 3126                                                     |

†Values used in this table are for the urban population

1 Initial value used in the stock of not-overweight population in 2005 for middle SES.

2 Initial value used in the stock of overweight population in 2005 for middle SES.

3 Initial value used in the stock of obese population in 2005 for middle SES.

**Table 84. Mortality rates and population size by age group at the department level for the higher socioeconomic status population (Central region) †**

| Departments   | Age group | Mortality rates (R) (%/year) | Not-overweight population in 2005 (Number of people) <sup>1</sup> | Overweight population in 2005 (Number of people) <sup>2</sup> | Obese population in 2005 (Number of people) <sup>3</sup> |
|---------------|-----------|------------------------------|-------------------------------------------------------------------|---------------------------------------------------------------|----------------------------------------------------------|
| Department 5  | 0-4       | 0.00274                      | 196816                                                            | 27147                                                         | 6787                                                     |
|               | 5-9       | 0.00027                      | 207910                                                            | 28677                                                         | 7169                                                     |
|               | 10-14     | 0.00029                      | 199418                                                            | 22158                                                         | 4432                                                     |
|               | 15-19     | 0.00091                      | 204419                                                            | 26809                                                         | 0                                                        |
|               | 20-24     | 0.00172                      | 171678                                                            | 30657                                                         | 18394                                                    |
|               | 25-29     | 0.00166                      | 129051                                                            | 70056                                                         | 11062                                                    |
|               | 30-34     | 0.00160                      | 87850                                                             | 82969                                                         | 29283                                                    |
|               | 35-39     | 0.00179                      | 99024                                                             | 90413                                                         | 21527                                                    |
|               | 40-44     | 0.00203                      | 91129                                                             | 70417                                                         | 45564                                                    |
|               | 45-49     | 0.00307                      | 77449                                                             | 70714                                                         | 20204                                                    |
| Department 17 | 0-4       | 0.00272                      | 15957                                                             | 1140                                                          | 3799                                                     |
|               | 5-9       | 0.00040                      | 24955                                                             | 2340                                                          | 780                                                      |
|               | 10-14     | 0.00024                      | 29493                                                             | 5433                                                          | 776                                                      |
|               | 15-19     | 0.00143                      | 37510                                                             | 3179                                                          | 1907                                                     |
|               | 20-24     | 0.00266                      | 24202                                                             | 5163                                                          | 1936                                                     |
|               | 25-29     | 0.00229                      | 17970                                                             | 4179                                                          | 2925                                                     |
|               | 30-34     | 0.00277                      | 15688                                                             | 7097                                                          | 2615                                                     |
|               | 35-39     | 0.00248                      | 15708                                                             | 8925                                                          | 4998                                                     |
|               | 40-44     | 0.00277                      | 15160                                                             | 16269                                                         | 3697                                                     |
|               | 45-49     | 0.00360                      | 10849                                                             | 10055                                                         | 6880                                                     |
| Department 18 | 0-4       | 0.00441                      | 5617                                                              | 1444                                                          | 160                                                      |
|               | 5-9       | 0.00029                      | 9167                                                              | 2157                                                          | 539                                                      |
|               | 10-14     | 0.00030                      | 5236                                                              | 748                                                           | 249                                                      |
|               | 15-19     | 0.00125                      | 5464                                                              | 1639                                                          | 273                                                      |
|               | 20-24     | 0.00239                      | 6521                                                              | 445                                                           | 445                                                      |

| Departments   | Age group | Mortality rates (R) (%/year) | Not-overweight population in 2005 (Number of people)1 | Overweight population in 2005 (Number of people)2 | Obese population in 2005 (Number of people)3 |
|---------------|-----------|------------------------------|-------------------------------------------------------|---------------------------------------------------|----------------------------------------------|
|               | 25-29     | 0.00378                      | 4906                                                  | 1635                                              | 467                                          |
|               | 30-34     | 0.00310                      | 3594                                                  | 2326                                              | 846                                          |
|               | 35-39     | 0.00213                      | 1239                                                  | 2974                                              | 1983                                         |
|               | 40-44     | 0.00341                      | 1872                                                  | 2807                                              | 936                                          |
|               | 45-49     | 0.00291                      | 2012                                                  | 1150                                              | 575                                          |
|               | 50-54     | 0.00529                      | 1349                                                  | 1541                                              | 963                                          |
|               | 55-59     | 0.00910                      | 814                                                   | 581                                               | 232                                          |
| Department 41 | 0-4       | 0.00354                      | 13633                                                 | 3853                                              | 1778                                         |
|               | 5-9       | 0.00027                      | 19769                                                 | 4162                                              | 0                                            |
|               | 10-14     | 0.00039                      | 24935                                                 | 3117                                              | 0                                            |
|               | 15-19     | 0.00111                      | 23053                                                 | 5489                                              | 0                                            |
|               | 20-24     | 0.00165                      | 16103                                                 | 4831                                              | 2415                                         |
|               | 25-29     | 0.00183                      | 12088                                                 | 4454                                              | 636                                          |
|               | 30-34     | 0.00200                      | 9340                                                  | 7589                                              | 584                                          |
|               | 35-39     | 0.00232                      | 8805                                                  | 8805                                              | 3302                                         |
|               | 40-44     | 0.00257                      | 9588                                                  | 3196                                              | 5327                                         |
|               | 45-49     | 0.00325                      | 4876                                                  | 9753                                              | 1951                                         |
| Department 63 | 0-4       | 0.00254                      | 12291                                                 | 673                                               | 337                                          |
|               | 5-9       | 0.00026                      | 15048                                                 | 2076                                              | 0                                            |
|               | 10-14     | 0.00020                      | 15989                                                 | 571                                               | 0                                            |
|               | 15-19     | 0.00127                      | 13654                                                 | 1951                                              | 0                                            |
|               | 20-24     | 0.00218                      | 16045                                                 | 1851                                              | 0                                            |
|               | 25-29     | 0.00192                      | 9445                                                  | 3542                                              | 1968                                         |
|               | 30-34     | 0.00218                      | 8013                                                  | 4735                                              | 728                                          |
|               | 35-39     | 0.00295                      | 7814                                                  | 3737                                              | 1699                                         |
|               | 40-44     | 0.00288                      | 7909                                                  | 4745                                              | 5536                                         |
|               | 45-49     | 0.00379                      | 7098                                                  | 7098                                              | 1577                                         |
| Department 66 | 0-4       | 0.00305                      | 16615                                                 | 2292                                              | 573                                          |
|               | 5-9       | 0.00038                      | 21590                                                 | 2978                                              | 744                                          |
|               | 10-14     | 0.00029                      | 21450                                                 | 2383                                              | 477                                          |
|               | 15-19     | 0.00177                      | 21088                                                 | 2766                                              | 0                                            |
|               | 20-24     | 0.00316                      | 22548                                                 | 4026                                              | 2416                                         |
|               | 25-29     | 0.00291                      | 14816                                                 | 8043                                              | 1270                                         |
|               | 30-34     | 0.00349                      | 8994                                                  | 8494                                              | 2998                                         |
|               | 35-39     | 0.00260                      | 9204                                                  | 8404                                              | 2001                                         |
|               | 40-44     | 0.00295                      | 11835                                                 | 9145                                              | 5917                                         |
|               | 45-49     | 0.00403                      | 10726                                                 | 9793                                              | 2798                                         |
|               | 50-54     | 0.00560                      | 11950                                                 | 6894                                              | 2298                                         |
|               | 55-59     | 0.00803                      | 9755                                                  | 4553                                              | 3252                                         |

| Departments   | Age group | Mortality rates (R) (%/year) | Not-overweight population in 2005 (Number of people) <sup>1</sup> | Overweight population in 2005 (Number of people) <sup>2</sup> | Obese population in 2005 (Number of people) <sup>3</sup> |
|---------------|-----------|------------------------------|-------------------------------------------------------------------|---------------------------------------------------------------|----------------------------------------------------------|
| Department 73 | 0-4       | 0.00309                      | 18239                                                             | 5155                                                          | 2379                                                     |
|               | 5-9       | 0.00032                      | 26463                                                             | 5571                                                          | 0                                                        |
|               | 10-14     | 0.00027                      | 34829                                                             | 4354                                                          | 0                                                        |
|               | 15-19     | 0.00083                      | 33506                                                             | 7978                                                          | 0                                                        |
|               | 20-24     | 0.00197                      | 20665                                                             | 6199                                                          | 3100                                                     |
|               | 25-29     | 0.00165                      | 16455                                                             | 6062                                                          | 866                                                      |
|               | 30-34     | 0.00171                      | 13366                                                             | 10860                                                         | 835                                                      |
|               | 35-39     | 0.00185                      | 13423                                                             | 13423                                                         | 5034                                                     |
|               | 40-44     | 0.00256                      | 15637                                                             | 5212                                                          | 8687                                                     |
|               | 45-49     | 0.00339                      | 8117                                                              | 16233                                                         | 3247                                                     |
|               | 50-54     | 0.00497                      | 5875                                                              | 11749                                                         | 4406                                                     |
| 55-59         | 0.00686   | 8616                         | 5169                                                              | 5169                                                          |                                                          |

<sup>†</sup>Values used in this table are for the urban population

<sup>1</sup> Initial value used in the stock of not-overweight population in 2005 for higher SES.

<sup>2</sup> Initial value used in the stock of overweight population in 2005 for higher SES.

<sup>3</sup> Initial value used in the stock of obese population in 2005 for higher SES.

## 1.4 Pacifica Region

The Pacifica region of Colombia is located in the eastern part of the national territory and consists of four departments, these are:

- Cauca (19)
- Chocó (27)
- Nariño (52)
- Valle Del Cauca (76)

### 1.4.1 Data and model parameters used

**Table 85. Prevalent rates of entire population by age group, sex, and body mass index category in 2005 (Pacifica region)**

| Age Group | Nutritional State Male |           |         | Nutritional State Female |           |         |
|-----------|------------------------|-----------|---------|--------------------------|-----------|---------|
|           | Not-Overweigh          | Overweigh | Obese   | Not-Overweigh            | Overweigh | Obese   |
| 0-4       | 0.78558                | 0.15595   | 0.05848 | 0.75569                  | 0.19048   | 0.05383 |
| 5-9       | 0.81818                | 0.13439   | 0.04743 | 0.80658                  | 0.13169   | 0.06173 |
| 10-14     | 0.83539                | 0.12757   | 0.03704 | 0.82474                  | 0.12027   | 0.05498 |
| 15-19     | 0.89286                | 0.08631   | 0.02083 | 0.78109                  | 0.19154   | 0.02736 |
| 20-24     | 0.79104                | 0.16667   | 0.04229 | 0.76214                  | 0.19741   | 0.04045 |
| 25-29     | 0.62500                | 0.28889   | 0.08611 | 0.59848                  | 0.28598   | 0.11553 |
| 30-34     | 0.53618                | 0.34539   | 0.11842 | 0.49791                  | 0.33682   | 0.16527 |
| 35-39     | 0.48454                | 0.38144   | 0.13402 | 0.42443                  | 0.39130   | 0.18427 |
| 40-44     | 0.41852                | 0.43333   | 0.14815 | 0.33781                  | 0.41611   | 0.24609 |
| 45-49     | 0.37500                | 0.47321   | 0.15179 | 0.25373                  | 0.41791   | 0.32836 |
| 50-54     | 0.44206                | 0.42489   | 0.13305 | 0.27072                  | 0.39227   | 0.33702 |

|       |         |         |         |         |         |         |
|-------|---------|---------|---------|---------|---------|---------|
| 55-59 | 0.38194 | 0.47222 | 0.14583 | 0.23551 | 0.36957 | 0.39493 |
|-------|---------|---------|---------|---------|---------|---------|

**Table 86. Prevalent rates of lower socioeconomic status population by age group, sex, and body mass index category in 2005 (Pacifica region)**

| Age Group | Nutritional State -Male |           |         | Nutritional State -Female |           |         |
|-----------|-------------------------|-----------|---------|---------------------------|-----------|---------|
|           | Not-Overweigh           | Overweigh | Obese   | Not-Overweigh             | Overweigh | Obese   |
| 0-4       | 0.80588                 | 0.13529   | 0.05882 | 0.80952                   | 0.13690   | 0.05357 |
| 5-9       | 0.87324                 | 0.11268   | 0.01408 | 0.90476                   | 0.06349   | 0.03175 |
| 10-14     | 0.91398                 | 0.06452   | 0.02151 | 0.87013                   | 0.12987   | 0.00000 |
| 15-19     | 1.00000                 | 0.00000   | 0.00000 | 0.74528                   | 0.21698   | 0.03774 |
| 20-24     | 0.86325                 | 0.11111   | 0.02564 | 0.73759                   | 0.20567   | 0.05674 |
| 25-29     | 0.76923                 | 0.15385   | 0.07692 | 0.53906                   | 0.31250   | 0.14844 |
| 30-34     | 0.69444                 | 0.19444   | 0.11111 | 0.49091                   | 0.34545   | 0.16364 |
| 35-39     | 0.68056                 | 0.26389   | 0.05556 | 0.44915                   | 0.35593   | 0.19492 |
| 40-44     | 0.56061                 | 0.33333   | 0.10606 | 0.38043                   | 0.36957   | 0.25000 |
| 45-49     | 0.63636                 | 0.25455   | 0.10909 | 0.22500                   | 0.46250   | 0.31250 |
| 50-54     | 0.76087                 | 0.15217   | 0.08696 | 0.27941                   | 0.41176   | 0.30882 |
| 55-59     | 0.64706                 | 0.26471   | 0.08824 | 0.21739                   | 0.43478   | 0.34783 |

**Table 87. Prevalent rates of middle socioeconomic status population by age group, sex, and body mass index category in 2005 (Pacifica region)**

| Age Group | Nutritional State Male |           |         | Nutritional State Female |           |         |
|-----------|------------------------|-----------|---------|--------------------------|-----------|---------|
|           | Not-Overweigh          | Overweigh | Obese   | Not-Overweigh            | Overweigh | Obese   |
| 0-4       | 0.77273                | 0.15152   | 0.07576 | 0.73973                  | 0.22603   | 0.03425 |
| 5-9       | 0.87013                | 0.11688   | 0.01299 | 0.85915                  | 0.11268   | 0.02817 |
| 10-14     | 0.80328                | 0.14754   | 0.04918 | 0.77477                  | 0.13514   | 0.09009 |
| 15-19     | 0.90000                | 0.07778   | 0.02222 | 0.84112                  | 0.14019   | 0.01869 |
| 20-24     | 0.74528                | 0.20755   | 0.04717 | 0.74118                  | 0.21765   | 0.04118 |
| 25-29     | 0.62281                | 0.28070   | 0.09649 | 0.58710                  | 0.30968   | 0.10323 |
| 30-34     | 0.52577                | 0.38144   | 0.09278 | 0.45522                  | 0.35821   | 0.18657 |
| 35-39     | 0.52874                | 0.36782   | 0.10345 | 0.40909                  | 0.32727   | 0.26364 |
| 40-44     | 0.53125                | 0.37500   | 0.09375 | 0.28682                  | 0.39535   | 0.31783 |
| 45-49     | 0.42857                | 0.44643   | 0.12500 | 0.24444                  | 0.36667   | 0.38889 |
| 50-54     | 0.43333                | 0.46667   | 0.10000 | 0.26667                  | 0.41333   | 0.32000 |
| 55-59     | 0.22581                | 0.54839   | 0.22581 | 0.21918                  | 0.31507   | 0.46575 |

**Table 88. Prevalent rates of higher socioeconomic status population by age group, sex, and body mass index category in 2005 (Pacifica region)**

| Age Group | Nutritional State Male |           |         | Nutritional State Female |           |         |
|-----------|------------------------|-----------|---------|--------------------------|-----------|---------|
|           | Not-Overweigh          | Overweigh | Obese   | Not-Overweigh            | Overweigh | Obese   |
| 0-4       | 0.77725                | 0.17536   | 0.04739 | 0.71598                  | 0.21302   | 0.07101 |
| 5-9       | 0.74286                | 0.16190   | 0.09524 | 0.71560                  | 0.18349   | 0.10092 |
| 10-14     | 0.77528                | 0.17978   | 0.04494 | 0.84466                  | 0.09709   | 0.05825 |
| 15-19     | 0.81379                | 0.15172   | 0.03448 | 0.76720                  | 0.20635   | 0.02646 |
| 20-24     | 0.77095                | 0.17877   | 0.05028 | 0.78502                  | 0.18241   | 0.03257 |
| 25-29     | 0.55952                | 0.35714   | 0.08333 | 0.63673                  | 0.25714   | 0.10612 |
| 30-34     | 0.45926                | 0.40000   | 0.14074 | 0.52564                  | 0.32051   | 0.15385 |

|       |         |         |         |         |         |         |
|-------|---------|---------|---------|---------|---------|---------|
| 35-39 | 0.34848 | 0.45455 | 0.19697 | 0.41961 | 0.43529 | 0.14510 |
| 40-44 | 0.30000 | 0.50714 | 0.19286 | 0.34956 | 0.44690 | 0.20354 |
| 45-49 | 0.22124 | 0.59292 | 0.18584 | 0.26724 | 0.42241 | 0.31034 |
| 50-54 | 0.33071 | 0.50394 | 0.16535 | 0.26941 | 0.37900 | 0.35160 |
| 55-59 | 0.32911 | 0.53165 | 0.13924 | 0.24841 | 0.37580 | 0.37580 |

**Table 89. Prevalent rates of entire population by age group, sex, and body mass index category in 2010 (Pacifica region)**

| Age Group | Nutritional State Male |           |         | Nutritional State Female |           |         |
|-----------|------------------------|-----------|---------|--------------------------|-----------|---------|
|           | Not-Overweigh          | Overweigh | Obese   | Not-Overweigh            | Overweigh | Obese   |
| 0-4       | 0.72851                | 0.19236   | 0.07913 | 0.75176                  | 0.19887   | 0.04937 |
| 5-9       | 0.75553                | 0.15848   | 0.08600 | 0.76800                  | 0.16667   | 0.06533 |
| 10-14     | 0.73949                | 0.17407   | 0.08645 | 0.76089                  | 0.18883   | 0.05028 |
| 15-19     | 0.82404                | 0.14746   | 0.02850 | 0.77235                  | 0.17759   | 0.05006 |
| 20-24     | 0.73607                | 0.20000   | 0.06393 | 0.69525                  | 0.22164   | 0.08311 |
| 25-29     | 0.56920                | 0.33723   | 0.09357 | 0.55601                  | 0.30055   | 0.14344 |
| 30-34     | 0.46764                | 0.40501   | 0.12735 | 0.40194                  | 0.40357   | 0.19449 |
| 35-39     | 0.40000                | 0.41772   | 0.18228 | 0.36799                  | 0.37789   | 0.25413 |
| 40-44     | 0.35648                | 0.48148   | 0.16204 | 0.34231                  | 0.41204   | 0.24564 |
| 45-49     | 0.42746                | 0.40933   | 0.16321 | 0.26847                  | 0.39099   | 0.34054 |
| 50-54     | 0.42089                | 0.41139   | 0.16772 | 0.23314                  | 0.38728   | 0.37958 |
| 55-59     | 0.39416                | 0.43796   | 0.16788 | 0.19471                  | 0.42067   | 0.38462 |

**Table 90. Prevalent rates of lower socioeconomic status population by age group, sex, and body mass index category in 2010 (Pacifica region)**

| Age Group | Nutritional State -Male |           |         | Nutritional State -Female |           |         |
|-----------|-------------------------|-----------|---------|---------------------------|-----------|---------|
|           | Not-Overweigh           | Overweigh | Obese   | Not-Overweigh             | Overweigh | Obese   |
| 0-4       | 0.73129                 | 0.22109   | 0.04762 | 0.74747                   | 0.21212   | 0.04040 |
| 5-9       | 0.84112                 | 0.12773   | 0.03115 | 0.82540                   | 0.13016   | 0.04444 |
| 10-14     | 0.79667                 | 0.15000   | 0.05333 | 0.79751                   | 0.15888   | 0.04361 |
| 15-19     | 0.86643                 | 0.11913   | 0.01444 | 0.73958                   | 0.20833   | 0.05208 |
| 20-24     | 0.79439                 | 0.15888   | 0.04673 | 0.64015                   | 0.25379   | 0.10606 |
| 25-29     | 0.61333                 | 0.33333   | 0.05333 | 0.46479                   | 0.31925   | 0.21596 |
| 30-34     | 0.45455                 | 0.40496   | 0.14050 | 0.32927                   | 0.42683   | 0.24390 |
| 35-39     | 0.47009                 | 0.33333   | 0.19658 | 0.33333                   | 0.35948   | 0.30719 |
| 40-44     | 0.48246                 | 0.42982   | 0.08772 | 0.32000                   | 0.38667   | 0.29333 |
| 45-49     | 0.55056                 | 0.30337   | 0.14607 | 0.19697                   | 0.38636   | 0.41667 |
| 50-54     | 0.53409                 | 0.35227   | 0.11364 | 0.30435                   | 0.34783   | 0.34783 |
| 55-59     | 0.47458                 | 0.40678   | 0.11864 | 0.25000                   | 0.37500   | 0.37500 |

**Table 91. Prevalent rates of middle socioeconomic status population by age group, sex, and body mass index category in 2010 (Pacifica region)**

| Age Group | Nutritional State Male |           |         | Nutritional State Female |           |         |
|-----------|------------------------|-----------|---------|--------------------------|-----------|---------|
|           | Not-Overweigh          | Overweigh | Obese   | Not-Overweigh            | Overweigh | Obese   |
| 0-4       | 0.71226                | 0.18396   | 0.10377 | 0.73711                  | 0.22165   | 0.04124 |
| 5-9       | 0.75983                | 0.17467   | 0.06550 | 0.76923                  | 0.14872   | 0.08205 |

|       |         |         |         |         |         |         |
|-------|---------|---------|---------|---------|---------|---------|
| 10-14 | 0.75000 | 0.17672 | 0.07328 | 0.75099 | 0.20158 | 0.04743 |
| 15-19 | 0.82328 | 0.15948 | 0.01724 | 0.78802 | 0.17512 | 0.03687 |
| 20-24 | 0.72185 | 0.21854 | 0.05960 | 0.70918 | 0.21939 | 0.07143 |
| 25-29 | 0.52083 | 0.34028 | 0.13889 | 0.53913 | 0.33043 | 0.13043 |
| 30-34 | 0.52448 | 0.36364 | 0.11189 | 0.41361 | 0.38743 | 0.19895 |
| 35-39 | 0.37615 | 0.49541 | 0.12844 | 0.32065 | 0.39674 | 0.28261 |
| 40-44 | 0.37398 | 0.44715 | 0.17886 | 0.38217 | 0.36943 | 0.24841 |
| 45-49 | 0.40187 | 0.46729 | 0.13084 | 0.24060 | 0.40602 | 0.35338 |
| 50-54 | 0.45588 | 0.35294 | 0.19118 | 0.19708 | 0.32847 | 0.47445 |
| 55-59 | 0.45833 | 0.36111 | 0.18056 | 0.16129 | 0.43011 | 0.40860 |

**Table 92. Prevalent rates of higher socioeconomic status population by age group, sex, and body mass index category in 2010 (Pacifica region)**

| Age Group | Nutritional State Male |           |         | Nutritional State Female |           |         |
|-----------|------------------------|-----------|---------|--------------------------|-----------|---------|
|           | Not-Overweigh          | Overweigh | Obese   | Not-Overweigh            | Overweigh | Obese   |
| 0-4       | 0.65882                | 0.16300   | 0.09692 | 0.77064                  | 0.16055   | 0.06881 |
| 5-9       | 0.66537                | 0.18182   | 0.17045 | 0.69167                  | 0.22917   | 0.07917 |
| 10-14     | 0.71895                | 0.19444   | 0.12654 | 0.73209                  | 0.20872   | 0.05919 |
| 15-19     | 0.82979                | 0.16443   | 0.05034 | 0.79042                  | 0.15269   | 0.05689 |
| 20-24     | 0.75893                | 0.22449   | 0.08163 | 0.73490                  | 0.19463   | 0.07047 |
| 25-29     | 0.64103                | 0.33790   | 0.09132 | 0.63668                  | 0.26298   | 0.10035 |
| 30-34     | 0.54971                | 0.43256   | 0.13023 | 0.43893                  | 0.40076   | 0.16031 |
| 35-39     | 0.45588                | 0.42604   | 0.20710 | 0.42007                  | 0.37546   | 0.20446 |
| 40-44     | 0.37857                | 0.53333   | 0.19487 | 0.33333                  | 0.44444   | 0.22222 |
| 45-49     | 0.53676                | 0.42632   | 0.18947 | 0.31379                  | 0.38621   | 0.30000 |
| 50-54     | 0.47414                | 0.46875   | 0.18750 | 0.22097                  | 0.43446   | 0.34457 |
| 55-59     | 0.48454                | 0.48951   | 0.18182 | 0.18723                  | 0.43404   | 0.37872 |

**Table 93. Fraction of births for men by body mass index category, and socioeconomic status (Pacifica region)†**

| Population group | Lower SES (%/year) | Middle SES (%/year) | Higher SES (%/year) | Complete Urban Population (%/year) |
|------------------|--------------------|---------------------|---------------------|------------------------------------|
| Not- overweight  | 72,41%             | 85,19%              | 76,09%              | 77,45%                             |
| Overweight       | 17,24%             | 7,41%               | 19,57%              | 15,69%                             |
| Obese            | 10,34%             | 7,41%               | 4,35%               | 6,86%                              |

† The fractions of births by each BMI category correspond to the prevalences by BMI category of children aged 0 to 12 months

**Table 94. Fraction of births for women by body mass index category and socioeconomic status (Pacifica region)†**

| Population group | Lower SES (%/year) | Middle SES (%/year) | Higher SES (%/year) | Complete Urban Population (%/year) |
|------------------|--------------------|---------------------|---------------------|------------------------------------|
| Not- overweight  | 84,09%             | 75,00%              | 72,41%              | 78,10%                             |
| Overweight       | 11,36%             | 25,00%              | 27,59%              | 20,00%                             |

|              |       |       |       |       |
|--------------|-------|-------|-------|-------|
| <b>Obese</b> | 4,55% | 0,00% | 0,00% | 1,90% |
|--------------|-------|-------|-------|-------|

† The fractions of births by each BMI category correspond to the prevalences by BMI category of children aged 0 to 12 months

**Table 95. Mortality rates for men and population size by age group without segregate by socioeconomic status (Pacifica region) †**

| Age group | Mortality rates (R) (%/year) Male | Not- overweight men in 2005 (Number of people) <sup>1</sup> | Overweight men in 2005 (Number of people) <sup>2</sup> | Obese men in 2005 (Number of people) <sup>3</sup> |
|-----------|-----------------------------------|-------------------------------------------------------------|--------------------------------------------------------|---------------------------------------------------|
| 0-4       | 0.00307                           | 184596                                                      | 36644                                                  | 13742                                             |
| 5-9       | 0.00033                           | 203636                                                      | 33447                                                  | 11805                                             |
| 10-14     | 0.00038                           | 218566                                                      | 33377                                                  | 9690                                              |
| 15-19     | 0.00275                           | 226037                                                      | 21850                                                  | 5274                                              |
| 20-24     | 0.00451                           | 176846                                                      | 37260                                                  | 9454                                              |
| 25-29     | 0.00478                           | 123731                                                      | 57191                                                  | 17047                                             |
| 30-34     | 0.00447                           | 93277                                                       | 60086                                                  | 20601                                             |
| 35-39     | 0.00378                           | 84070                                                       | 66183                                                  | 23254                                             |
| 40-44     | 0.00398                           | 68393                                                       | 70814                                                  | 24210                                             |
| 45-49     | 0.00447                           | 51185                                                       | 64590                                                  | 20718                                             |
| 50-54     | 0.00621                           | 48842                                                       | 46945                                                  | 14700                                             |
| 55-59     | 0.00823                           | 32748                                                       | 40488                                                  | 12504                                             |

† Values used in this table are for the urban population

<sup>1</sup> Initial value used in the stock of not-overweight population in 2005.

<sup>2</sup> Initial value used in the stock of overweight population in 2005.

<sup>3</sup> Initial value used in the stock of obese population in 2005.

**Table 96. Mortality rates for women and population size by age group without segregate by socioeconomic status (Pacifica region) †**

| Age group | Mortality rates (R) (%/year) | Not- overweight women in 2005 (Number of people) <sup>1</sup> | Overweight women in 2005 (Number of people) <sup>2</sup> | Obese women in 2005 (Number of people) <sup>3</sup> |
|-----------|------------------------------|---------------------------------------------------------------|----------------------------------------------------------|-----------------------------------------------------|
| 0-4       | 0,00252                      | 171187                                                        | 43149                                                    | 12194                                               |
| 5-9       | 0,00019                      | 194155                                                        | 31699                                                    | 14859                                               |
| 10-14     | 0,00028                      | 209050                                                        | 30486                                                    | 13937                                               |
| 15-19     | 0,00059                      | 198205                                                        | 48604                                                    | 6943                                                |
| 20-24     | 0,00085                      | 181109                                                        | 46912                                                    | 9613                                                |
| 25-29     | 0,00095                      | 129444                                                        | 61855                                                    | 24988                                               |
| 30-34     | 0,00101                      | 97854                                                         | 66196                                                    | 32481                                               |
| 35-39     | 0,00132                      | 86582                                                         | 79824                                                    | 37589                                               |
| 40-44     | 0,00157                      | 65676                                                         | 80899                                                    | 47844                                               |
| 45-49     | 0,00235                      | 42021                                                         | 69211                                                    | 54380                                               |
| 50-54     | 0,00354                      | 36458                                                         | 52827                                                    | 45386                                               |
| 55-59     | 0,00526                      | 24456                                                         | 38377                                                    | 41010                                               |

† Values used in this table are for the urban population

<sup>1</sup> Initial value used in the stock of not-overweight population in 2005.

<sup>2</sup> Initial value used in the stock of overweight population in 2005.

<sup>3</sup> Initial value used in the stock of obese population in 2005.

**Table 97. Man mortality rates and population size by age group for the lower socioeconomic status population (Pacifica region) †**

| Age group | Mortality rates (R) (%/year) | Not- overweight men in 2005 (Number of people) <sup>1</sup> | Overweight men in 2005 (Number of people) <sup>2</sup> | Obese men 2005 (Number of people) <sup>3</sup> |
|-----------|------------------------------|-------------------------------------------------------------|--------------------------------------------------------|------------------------------------------------|
| 0-4       | 0.00307                      | 62753                                                       | 10535                                                  | 4581                                           |
| 5-9       | 0.00033                      | 60992                                                       | 7870                                                   | 984                                            |
| 10-14     | 0.00038                      | 91518                                                       | 6460                                                   | 2153                                           |
| 15-19     | 0.00275                      | 76099                                                       | 0                                                      | 0                                              |
| 20-24     | 0.00451                      | 56168                                                       | 7230                                                   | 1668                                           |
| 25-29     | 0.00478                      | 32995                                                       | 6599                                                   | 3299                                           |
| 30-34     | 0.00447                      | 28613                                                       | 8011                                                   | 4578                                           |
| 35-39     | 0.00378                      | 29216                                                       | 11329                                                  | 2385                                           |
| 40-44     | 0.00398                      | 22394                                                       | 13315                                                  | 4237                                           |
| 45-49     | 0.00447                      | 21327                                                       | 8531                                                   | 3656                                           |
| 50-54     | 0.00621                      | 16597                                                       | 3319                                                   | 1897                                           |
| 55-59     | 0.00823                      | 13099                                                       | 5359                                                   | 1786                                           |

†Values used in this table are for the urban population

<sup>1</sup> Initial value used in the stock of not-overweight population in 2005 for lower SES.

<sup>2</sup> Initial value used in the stock of overweight population in 2005 for lower SES.

<sup>3</sup> Initial value used in the stock of obese population in 2005 for lower SES.

**Table 98. Women mortality rates and population size by age group for the lower socioeconomic status population (Pacifica region) †**

| Age group | Mortality rates (R) (%/year) | Not- overweight women in 2005 (Number of people) <sup>1</sup> | Overweight women in 2005 (Number of people) <sup>2</sup> | Obese women in 2005 (Number of people) <sup>3</sup> |
|-----------|------------------------------|---------------------------------------------------------------|----------------------------------------------------------|-----------------------------------------------------|
| 0-4       | 0.00252                      | 60770                                                         | 10277                                                    | 4022                                                |
| 5-9       | 0.00019                      | 61118                                                         | 4289                                                     | 2145                                                |
| 10-14     | 0.00028                      | 84410                                                         | 12598                                                    | 0                                                   |
| 15-19     | 0.00059                      | 56848                                                         | 16551                                                    | 2878                                                |
| 20-24     | 0.00085                      | 51013                                                         | 14225                                                    | 3924                                                |
| 25-29     | 0.00095                      | 25262                                                         | 14644                                                    | 6956                                                |
| 30-34     | 0.00101                      | 22850                                                         | 16080                                                    | 7617                                                |
| 35-39     | 0.00132                      | 22670                                                         | 17965                                                    | 9838                                                |
| 40-44     | 0.00157                      | 18080                                                         | 17563                                                    | 11881                                               |
| 45-49     | 0.00235                      | 9149                                                          | 18807                                                    | 12707                                               |
| 50-54     | 0.00354                      | 7429                                                          | 10948                                                    | 8211                                                |
| 55-59     | 0.00526                      | 5330                                                          | 10660                                                    | 8528                                                |

†Values used in this table are for the urban population

<sup>1</sup> Initial value used in the stock of not-overweight population in 2005 for lower SES.

<sup>2</sup> Initial value used in the stock of overweight population in 2005 for lower SES.

<sup>3</sup> Initial value used in the stock of obese population in 2005 for lower SES.

**Table 99. Man mortality rates and population size by age group for the middle socioeconomic status population (Pacifica region) †**

| Age group | Mortality rates (R) (%/year) | Not- overweight men in 2005 (Number of people) <sup>1</sup> | Overweight men in 2005 (Number of people) <sup>2</sup> | Obese men 2005 (Number of people) <sup>3</sup> |
|-----------|------------------------------|-------------------------------------------------------------|--------------------------------------------------------|------------------------------------------------|
| 0-4       | 0.00307                      | 46722                                                       | 9161                                                   | 4581                                           |
| 5-9       | 0.00033                      | 65911                                                       | 8854                                                   | 984                                            |
| 10-14     | 0.00038                      | 52757                                                       | 9690                                                   | 3230                                           |
| 15-19     | 0.00275                      | 61030                                                       | 5274                                                   | 1507                                           |
| 20-24     | 0.00451                      | 43933                                                       | 12235                                                  | 2781                                           |
| 25-29     | 0.00478                      | 39044                                                       | 17597                                                  | 6049                                           |
| 30-34     | 0.00447                      | 29185                                                       | 21173                                                  | 5150                                           |
| 35-39     | 0.00378                      | 27427                                                       | 19080                                                  | 5366                                           |



|       |         |       |       |      |
|-------|---------|-------|-------|------|
| 40-44 | 0.00398 | 20578 | 14526 | 3631 |
| 45-49 | 0.00447 | 14624 | 15234 | 4265 |
| 50-54 | 0.00621 | 12329 | 13277 | 2845 |
| 55-59 | 0.00823 | 4168  | 10122 | 4168 |

†Values used in this table are for the urban population

1 Initial value used in the stock of not-overweight population in 2005 for middle SES.

2 Initial value used in the stock of overweight population in 2005 for middle SES.

3 Initial value used in the stock of obese population in 2005 for middle SES.

**Table 100. Women mortality rates and population size by age group for the middle socioeconomic status population (Pacifica region) †**

| Age group | Mortality rates (R) (%/year) | Not- overweight women in 2005 (Number of people) <sup>1</sup> | Overweight women in 2005 (Number of people) <sup>2</sup> | Obese women in 2005 (Number of people) <sup>3</sup> |
|-----------|------------------------------|---------------------------------------------------------------|----------------------------------------------------------|-----------------------------------------------------|
| 0-4       | 0.00252                      | 43117                                                         | 13175                                                    | 1996                                                |
| 5-9       | 0.00019                      | 62942                                                         | 8255                                                     | 2064                                                |
| 10-14     | 0.00028                      | 49298                                                         | 8599                                                     | 5732                                                |
| 15-19     | 0.00059                      | 57171                                                         | 9528                                                     | 1270                                                |
| 20-24     | 0.00085                      | 46442                                                         | 13638                                                    | 2580                                                |
| 25-29     | 0.00095                      | 40211                                                         | 21210                                                    | 7070                                                |
| 30-34     | 0.00101                      | 28547                                                         | 22463                                                    | 11699                                               |
| 35-39     | 0.00132                      | 24950                                                         | 19960                                                    | 16079                                               |
| 40-44     | 0.00157                      | 13218                                                         | 18219                                                    | 14647                                               |
| 45-49     | 0.00235                      | 10121                                                         | 15181                                                    | 16101                                               |
| 50-54     | 0.00354                      | 9248                                                          | 14334                                                    | 11097                                               |
| 55-59     | 0.00526                      | 4900                                                          | 7043                                                     | 10412                                               |

†Values used in this table are for the urban population

1 Initial value used in the stock of not-overweight population in 2005 for middle SES.

2 Initial value used in the stock of overweight population in 2005 for middle SES.

3 Initial value used in the stock of obese population in 2005 for middle SES.

**Table 101. Man mortality rates and population size by age group for the higher socioeconomic status population (Pacifica region) †**

| Age group | Mortality rates (R) (%/year) | Not- overweight men in 2005 (Number of people) <sup>1</sup> | Overweight men in 2005 (Number of people) <sup>2</sup> | Obese men in 2005 (Number of people) <sup>3</sup> |
|-----------|------------------------------|-------------------------------------------------------------|--------------------------------------------------------|---------------------------------------------------|
| 0-4       | 0.00307                      | 75121                                                       | 16948                                                  | 4581                                              |
| 5-9       | 0.00033                      | 76732                                                       | 16724                                                  | 9837                                              |
| 10-14     | 0.00038                      | 74291                                                       | 17227                                                  | 4307                                              |
| 15-19     | 0.00275                      | 88908                                                       | 16576                                                  | 3767                                              |
| 20-24     | 0.00451                      | 76744                                                       | 17796                                                  | 5005                                              |
| 25-29     | 0.00478                      | 51692                                                       | 32995                                                  | 7699                                              |
| 30-34     | 0.00447                      | 35480                                                       | 30902                                                  | 10873                                             |
| 35-39     | 0.00378                      | 27427                                                       | 35775                                                  | 15502                                             |
| 40-44     | 0.00398                      | 25420                                                       | 42972                                                  | 16342                                             |
| 45-49     | 0.00447                      | 15234                                                       | 40826                                                  | 12796                                             |
| 50-54     | 0.00621                      | 19916                                                       | 30348                                                  | 9958                                              |
| 55-59     | 0.00823                      | 15481                                                       | 25008                                                  | 6550                                              |

†Values used in this table are for the urban population

<sup>1</sup> Initial value used in the stock of not-overweight population in 2005 for higher SES.

<sup>2</sup> Initial value used in the stock of overweight population in 2005 for higher SES.

<sup>3</sup> Initial value used in the stock of obese population in 2005 for higher SES.

**Table 102. Women mortality rates and population size by age group for the higher socioeconomic status population (Pacifica region)†**

| Age group | Mortality rates (R) (%/year) | Not- overweight women in 2005 (Number of people) <sup>1</sup> | Overweight women in 2005 (Number of people) <sup>2</sup> | Obese women in 2005 (Number of people) <sup>3</sup> |
|-----------|------------------------------|---------------------------------------------------------------|----------------------------------------------------------|-----------------------------------------------------|
| 0-4       | 0.00252                      | 66710                                                         | 19848                                                    | 6616                                                |
| 5-9       | 0.00019                      | 71489                                                         | 18330                                                    | 10082                                               |
| 10-14     | 0.00028                      | 78415                                                         | 9013                                                     | 5408                                                |
| 15-19     | 0.00059                      | 84013                                                         | 22597                                                    | 2897                                                |
| 20-24     | 0.00085                      | 83064                                                         | 19301                                                    | 3447                                                |
| 25-29     | 0.00095                      | 64268                                                         | 25954                                                    | 10711                                               |
| 30-34     | 0.00101                      | 45875                                                         | 27973                                                    | 13427                                               |
| 35-39     | 0.00132                      | 38828                                                         | 40279                                                    | 13426                                               |
| 40-44     | 0.00157                      | 35239                                                         | 45052                                                    | 20519                                               |
| 45-49     | 0.00235                      | 22327                                                         | 35291                                                    | 25928                                               |
| 50-54     | 0.00354                      | 19776                                                         | 27820                                                    | 25809                                               |
| 55-59     | 0.00526                      | 14152                                                         | 21409                                                    | 21409                                               |

†Values used in this table are for the urban population

<sup>1</sup> Initial value used in the stock of not-overweight population in 2005 for higher SES.

<sup>2</sup> Initial value used in the stock of overweight population in 2005 for higher SES.

<sup>3</sup> Initial value used in the stock of obese population in 2005 for higher SES.

**Table 103. Data and projections of the Fertility rates by department and Region (Pacifica region)†**

| Year | Fecundity Rate Depto 19 | Fecundity Rate Depto 27 | Fecundity Rate Depto 52 | Fecundity Rate Depto 76 | Average Region Fecundity Rate |
|------|-------------------------|-------------------------|-------------------------|-------------------------|-------------------------------|
| 2005 | 2,9221                  | 4,2998                  | 2,8307                  | 2,1453                  | 3,049                         |
| 2006 | 2,8724                  | 4,2157                  | 2,7773                  | 2,1232                  | 2,997                         |
| 2007 | 2,8227                  | 4,1316                  | 2,7239                  | 2,1011                  | 2,945                         |
| 2008 | 2,773                   | 4,0475                  | 2,6705                  | 2,079                   | 2,893                         |
| 2009 | 2,7509                  | 3,9639                  | 2,6396                  | 2,0708                  | 2,856                         |
| 2010 | 2,7288                  | 3,8803                  | 2,6087                  | 2,0626                  | 2,820                         |
| 2011 | 2,7067                  | 3,7967                  | 2,5778                  | 2,0544                  | 2,784                         |
| 2012 | 2,6846                  | 3,7131                  | 2,5469                  | 2,0462                  | 2,748                         |
| 2013 | 2,6625                  | 3,6295                  | 2,516                   | 2,038                   | 2,712                         |
| 2014 | 2,6518                  | 3,5632                  | 2,4997                  | 2,035                   | 2,687                         |
| 2015 | 2,6411                  | 3,4969                  | 2,4834                  | 2,032                   | 2,663                         |
| 2016 | 2,6304                  | 3,4306                  | 2,4671                  | 2,029                   | 2,639                         |
| 2017 | 2,6197                  | 3,3643                  | 2,4508                  | 2,026                   | 2,615                         |
| 2018 | 2,609                   | 3,298                   | 2,4345                  | 2,023                   | 2,591                         |
| 2019 | 2,5983                  | 3,2317                  | 2,4182                  | 2,02                    | 2,567                         |
| 2020 | 2,5876                  | 3,1654                  | 2,4019                  | 2,017                   | 2,543                         |

| Year | Fecundity Rate Depto 19 | Fecundity Rate Depto 27 | Fecundity Rate Depto 52 | Fecundity Rate Depto 76 | Average Region Fecundity Rate |
|------|-------------------------|-------------------------|-------------------------|-------------------------|-------------------------------|
| 2021 | 2,5769                  | 3,0991                  | 2,3856                  | 2,014                   | 2,519                         |
| 2022 | 2,5662                  | 3,0328                  | 2,3693                  | 2,011                   | 2,495                         |
| 2023 | 2,5555                  | 2,9665                  | 2,353                   | 2,008                   | 2,471                         |
| 2024 | 2,5448                  | 2,9002                  | 2,3367                  | 2,005                   | 2,447                         |
| 2025 | 2,5341                  | 2,8339                  | 2,3204                  | 2,002                   | 2,423                         |
| 2026 | 2,5234                  | 2,7676                  | 2,3041                  | 1,999                   | 2,399                         |
| 2027 | 2,5127                  | 2,7013                  | 2,2878                  | 1,996                   | 2,374                         |
| 2028 | 2,502                   | 2,635                   | 2,2715                  | 1,993                   | 2,350                         |
| 2029 | 2,4913                  | 2,5687                  | 2,2552                  | 1,99                    | 2,326                         |
| 2030 | 2,4806                  | 2,5024                  | 2,2389                  | 1,987                   | 2,302                         |

† Data of Fertility rate of DANE [1] was used to forecast the department's fertility rate from 2005 to 2030. Holt-Winters no seasonal method in EViews 5 (Quantitative Micro Software, LLC) was used to forecast the fertility rate. In the SD model we used data from 2005 to 2030 and the region fertility rate was calculated as the average of all departments' fertility rates.

**Table 104. Fraction of births by departments, body mass index category, and socioeconomic status (Pacifica region) †**

| Population group |                 | Lower SES (%/year) | Middle SES (%/year) | Higher SES (%/year) | Complete Urban Population (%/year) |
|------------------|-----------------|--------------------|---------------------|---------------------|------------------------------------|
| Department 19    | Not- overweight | 83,33%             | 75,00%              | 72,73%              | 78,05%                             |
|                  | Overweight      | 11,11%             | 25,00%              | 27,27%              | 19,51%                             |
|                  | Obese           | 5,56%              | 0,00%               | 0,00%               | 2,44%                              |
| Department 27    | Not- overweight | 75,00%             | 60,00%              | 80,00%              | 73,08%                             |
|                  | Overweight      | 18,75%             | 0,00%               | 20,00%              | 15,38%                             |
|                  | Obese           | 6,25%              | 40,00%              | 0,00%               | 11,54%                             |
| Department 52    | Not- overweight | 69,23%             | 83,33%              | 68,75%              | 73,17%                             |
|                  | Overweight      | 23,08%             | 8,33%               | 31,25%              | 21,95%                             |
|                  | Obese           | 7,69%              | 8,33%               | 0,00%               | 4,88%                              |
| Department 76    | Not- overweight | 84,38%             | 81,82%              | 80,00%              | 81,74%                             |
|                  | Overweight      | 9,38%              | 18,18%              | 16,00%              | 14,78%                             |
|                  | Obese           | 6,25%              | 0,00%               | 4,00%               | 3,48%                              |

† The fractions of births by each BMI category correspond to the prevalences by BMI category of children aged 0 to 12 months

**Table 105. Prevalent rates of entire population by age group, and body mass index category (Pacifica region)**

| Departments   | Age group | Not- overweight in 2005 | Overweight in 2005 | Obese in 2005 | Not- overweight in 2010 | Overweight in 2010 | Obese in 2010 |
|---------------|-----------|-------------------------|--------------------|---------------|-------------------------|--------------------|---------------|
| Department 19 | 0-4       | 0.75172                 | 0.19310            | 0.05517       | 0.68485                 | 0.23030            | 0.08485       |
|               | 5-9       | 0.84524                 | 0.10714            | 0.04762       | 0.73418                 | 0.19620            | 0.06962       |
|               | 10-14     | 0.82143                 | 0.16667            | 0.01190       | 0.70202                 | 0.21717            | 0.08081       |
|               | 15-19     | 0.80000                 | 0.17692            | 0.02308       | 0.76471                 | 0.20321            | 0.03209       |
|               | 20-24     | 0.80226                 | 0.19209            | 0.00565       | 0.72789                 | 0.19048            | 0.08163       |
|               | 25-29     | 0.67717                 | 0.22047            | 0.10236       | 0.56338                 | 0.29577            | 0.14085       |
|               | 30-34     | 0.59184                 | 0.29592            | 0.11224       | 0.42975                 | 0.41322            | 0.15702       |
|               | 35-39     | 0.50420                 | 0.33613            | 0.15966       | 0.38983                 | 0.40678            | 0.20339       |
| 40-44         | 0.51429   | 0.35238                 | 0.13333            | 0.28704       | 0.50000                 | 0.21296            |               |

| Departments   | Age group | Not- overweight in 2005 | Overweight in 2005 | Obese in 2005 | Not- overweight in 2010 | Overweight in 2010 | Obese in 2010 |
|---------------|-----------|-------------------------|--------------------|---------------|-------------------------|--------------------|---------------|
|               | 45-49     | 0.40260                 | 0.33766            | 0.25974       | 0.36190                 | 0.34286            | 0.29524       |
|               | 50-54     | 0.40230                 | 0.33333            | 0.26437       | 0.29885                 | 0.42529            | 0.27586       |
|               | 55-59     | 0.31944                 | 0.41667            | 0.26389       | 0.26744                 | 0.45349            | 0.27907       |
| Department 27 | 0-4       | 0.78992                 | 0.16807            | 0.04202       | 0.75899                 | 0.20144            | 0.03957       |
|               | 5-9       | 0.93023                 | 0.06977            | 0.00000       | 0.85315                 | 0.10140            | 0.04545       |
|               | 10-14     | 0.77500                 | 0.18750            | 0.03750       | 0.83730                 | 0.11508            | 0.04762       |
|               | 15-19     | 0.84071                 | 0.14159            | 0.01770       | 0.81538                 | 0.14615            | 0.03846       |
|               | 20-24     | 0.69231                 | 0.21538            | 0.09231       | 0.73077                 | 0.18803            | 0.08120       |
|               | 25-29     | 0.54128                 | 0.30275            | 0.15596       | 0.51705                 | 0.32386            | 0.15909       |
|               | 30-34     | 0.48936                 | 0.37234            | 0.13830       | 0.37903                 | 0.39516            | 0.22581       |
|               | 35-39     | 0.44048                 | 0.33333            | 0.22619       | 0.38393                 | 0.33036            | 0.28571       |
|               | 40-44     | 0.30159                 | 0.36508            | 0.33333       | 0.33600                 | 0.41600            | 0.24800       |
|               | 45-49     | 0.17105                 | 0.51316            | 0.31579       | 0.25773                 | 0.41237            | 0.32990       |
|               | 50-54     | 0.24194                 | 0.41935            | 0.33871       | 0.39796                 | 0.33673            | 0.26531       |
|               | 55-59     | 0.21277                 | 0.40426            | 0.38298       | 0.36486                 | 0.32432            | 0.31081       |
| Department 52 | 0-4       | 0.73118                 | 0.19355            | 0.07527       | 0.70051                 | 0.24365            | 0.05584       |
|               | 5-9       | 0.75556                 | 0.18889            | 0.05556       | 0.78764                 | 0.15830            | 0.05405       |
|               | 10-14     | 0.85000                 | 0.10000            | 0.05000       | 0.74161                 | 0.21812            | 0.04027       |
|               | 15-19     | 0.87200                 | 0.10400            | 0.02400       | 0.80672                 | 0.16387            | 0.02941       |
|               | 20-24     | 0.77515                 | 0.19527            | 0.02959       | 0.71642                 | 0.23881            | 0.04478       |
|               | 25-29     | 0.56395                 | 0.37209            | 0.06395       | 0.56742                 | 0.33708            | 0.09551       |
|               | 30-34     | 0.42553                 | 0.47518            | 0.09929       | 0.41860                 | 0.45349            | 0.12791       |
|               | 35-39     | 0.39735                 | 0.47682            | 0.12583       | 0.39306                 | 0.37572            | 0.23121       |
|               | 40-44     | 0.31250                 | 0.46875            | 0.21875       | 0.28571                 | 0.45455            | 0.25974       |
|               | 45-49     | 0.25191                 | 0.37405            | 0.37405       | 0.31690                 | 0.43662            | 0.24648       |
|               | 50-54     | 0.34653                 | 0.36634            | 0.28713       | 0.26471                 | 0.45098            | 0.28431       |
|               | 55-59     | 0.23596                 | 0.37079            | 0.39326       | 0.17073                 | 0.43902            | 0.39024       |
| Department 76 | 0-4       | 0.78571                 | 0.16117            | 0.05311       | 0.75436                 | 0.17456            | 0.07107       |
|               | 5-9       | 0.80287                 | 0.13262            | 0.06452       | 0.72822                 | 0.17770            | 0.09408       |
|               | 10-14     | 0.84074                 | 0.10000            | 0.05926       | 0.74078                 | 0.18046            | 0.07876       |
|               | 15-19     | 0.82703                 | 0.14595            | 0.02703       | 0.79709                 | 0.15921            | 0.04370       |
|               | 20-24     | 0.78309                 | 0.17279            | 0.04412       | 0.70483                 | 0.21628            | 0.07888       |
|               | 25-29     | 0.62292                 | 0.27083            | 0.10625       | 0.57009                 | 0.31242            | 0.11749       |
|               | 30-34     | 0.52784                 | 0.30067            | 0.17149       | 0.44330                 | 0.39175            | 0.16495       |
|               | 35-39     | 0.45000                 | 0.38095            | 0.16905       | 0.37458                 | 0.40803            | 0.21739       |
|               | 40-44     | 0.35867                 | 0.43468            | 0.20665       | 0.37426                 | 0.43195            | 0.19379       |
|               | 45-49     | 0.31871                 | 0.46784            | 0.21345       | 0.34506                 | 0.39698            | 0.25796       |
|               | 50-54     | 0.33623                 | 0.43188            | 0.23188       | 0.29562                 | 0.39234            | 0.31204       |
|               | 55-59     | 0.31132                 | 0.41509            | 0.27358       | 0.27902                 | 0.43750            | 0.28348       |

**Table 106. Prevalent rates of lower socioeconomic status population by age group, and body mass index category (Pacifica region)**

| Departments   | Age group | Not- overweight in 2005 | Overweight in 2005 | Obese in 2005 | Not- overweight in 2010 | Overweight in 2010 | Obese in 2010 |
|---------------|-----------|-------------------------|--------------------|---------------|-------------------------|--------------------|---------------|
| Department 19 | 0-4       | 0.82353                 | 0.10294            | 0.07353       | 0.71014                 | 0.21739            | 0.07246       |
|               | 5-9       | 0.93103                 | 0.06897            | 0.00000       | 0.77193                 | 0.17544            | 0.05263       |

| Departments   | Age group | Not- overweight in 2005 | Overweight in 2005 | Obese in 2005 | Not- overweight in 2010 | Overweight in 2010 | Obese in 2010 |
|---------------|-----------|-------------------------|--------------------|---------------|-------------------------|--------------------|---------------|
|               | 10-14     | 0.85294                 | 0.14706            | 0.00000       | 0.70886                 | 0.18987            | 0.10127       |
|               | 15-19     | 0.87805                 | 0.12195            | 0.00000       | 0.77419                 | 0.22581            | 0.00000       |
|               | 20-24     | 0.83333                 | 0.16667            | 0.00000       | 0.68333                 | 0.23333            | 0.08333       |
|               | 25-29     | 0.59459                 | 0.21622            | 0.18919       | 0.52273                 | 0.34091            | 0.13636       |
|               | 30-34     | 0.58974                 | 0.20513            | 0.20513       | 0.35714                 | 0.42857            | 0.21429       |
|               | 35-39     | 0.52381                 | 0.35714            | 0.11905       | 0.39394                 | 0.36364            | 0.24242       |
|               | 40-44     | 0.62500                 | 0.18750            | 0.18750       | 0.31250                 | 0.50000            | 0.18750       |
|               | 45-49     | 0.66667                 | 0.16667            | 0.16667       | 0.41667                 | 0.29167            | 0.29167       |
|               | 50-54     | 0.57143                 | 0.17857            | 0.25000       | 0.40741                 | 0.37037            | 0.22222       |
|               | 55-59     | 0.38462                 | 0.30769            | 0.30769       | 0.33333                 | 0.40000            | 0.26667       |
| Department 27 | 0-4       | 0.80952                 | 0.15476            | 0.03571       | 0.76226                 | 0.20000            | 0.03774       |
|               | 5-9       | 0.96875                 | 0.03125            | 0.00000       | 0.85348                 | 0.09890            | 0.04762       |
|               | 10-14     | 0.83333                 | 0.14583            | 0.02083       | 0.82759                 | 0.12069            | 0.05172       |
|               | 15-19     | 0.85246                 | 0.13115            | 0.01639       | 0.81667                 | 0.15417            | 0.02917       |
|               | 20-24     | 0.74684                 | 0.17722            | 0.07595       | 0.72646                 | 0.19283            | 0.08072       |
|               | 25-29     | 0.63043                 | 0.21739            | 0.15217       | 0.49677                 | 0.33548            | 0.16774       |
|               | 30-34     | 0.57692                 | 0.34615            | 0.07692       | 0.37719                 | 0.41228            | 0.21053       |
|               | 35-39     | 0.54167                 | 0.31250            | 0.14583       | 0.39048                 | 0.31429            | 0.29524       |
|               | 40-44     | 0.41379                 | 0.31034            | 0.27586       | 0.35088                 | 0.40351            | 0.24561       |
|               | 45-49     | 0.23404                 | 0.46809            | 0.29787       | 0.24731                 | 0.43011            | 0.32258       |
|               | 50-54     | 0.28571                 | 0.50000            | 0.21429       | 0.37931                 | 0.36782            | 0.25287       |
|               | 55-59     | 0.26087                 | 0.43478            | 0.30435       | 0.38095                 | 0.31746            | 0.30159       |
| Department 52 | 0-4       | 0.68852                 | 0.18033            | 0.13115       | 0.70370                 | 0.24074            | 0.05556       |
|               | 5-9       | 0.77778                 | 0.14815            | 0.07407       | 0.80986                 | 0.14789            | 0.04225       |
|               | 10-14     | 0.93750                 | 0.03125            | 0.03125       | 0.74324                 | 0.22297            | 0.03378       |
|               | 15-19     | 0.91892                 | 0.05405            | 0.02703       | 0.76471                 | 0.19118            | 0.04412       |
|               | 20-24     | 0.78125                 | 0.18750            | 0.03125       | 0.70787                 | 0.25843            | 0.03371       |
|               | 25-29     | 0.60870                 | 0.28261            | 0.10870       | 0.58904                 | 0.28767            | 0.12329       |
|               | 30-34     | 0.46429                 | 0.46429            | 0.07143       | 0.35714                 | 0.48571            | 0.15714       |
|               | 35-39     | 0.51351                 | 0.32432            | 0.16216       | 0.38806                 | 0.41791            | 0.19403       |
|               | 40-44     | 0.39286                 | 0.39286            | 0.21429       | 0.31034                 | 0.46552            | 0.22414       |
|               | 45-49     | 0.35714                 | 0.32143            | 0.32143       | 0.32558                 | 0.37209            | 0.30233       |
|               | 50-54     | 0.56250                 | 0.12500            | 0.31250       | 0.38462                 | 0.28205            | 0.33333       |
|               | 55-59     | 0.53333                 | 0.26667            | 0.20000       | 0.20690                 | 0.48276            | 0.31034       |
| Department 76 | 0-4       | 0.85600                 | 0.12000            | 0.02400       | 0.73826                 | 0.22819            | 0.03356       |
|               | 5-9       | 0.86957                 | 0.10870            | 0.02174       | 0.84146                 | 0.14634            | 0.01220       |
|               | 10-14     | 0.94643                 | 0.05357            | 0.00000       | 0.84568                 | 0.12346            | 0.03086       |
|               | 15-19     | 0.85294                 | 0.11765            | 0.02941       | 0.82677                 | 0.12598            | 0.04724       |
|               | 20-24     | 0.81609                 | 0.13793            | 0.04598       | 0.68868                 | 0.19811            | 0.11321       |
|               | 25-29     | 0.64935                 | 0.27273            | 0.07792       | 0.52747                 | 0.32967            | 0.14286       |
|               | 30-34     | 0.60317                 | 0.20635            | 0.19048       | 0.42466                 | 0.35616            | 0.21918       |
|               | 35-39     | 0.55556                 | 0.30159            | 0.14286       | 0.40000                 | 0.32308            | 0.27692       |
|               | 40-44     | 0.42029                 | 0.43478            | 0.14493       | 0.58333                 | 0.30000            | 0.11667       |
|               | 45-49     | 0.47619                 | 0.40476            | 0.11905       | 0.45902                 | 0.24590            | 0.29508       |
|               | 50-54     | 0.50000                 | 0.33333            | 0.16667       | 0.46000                 | 0.36000            | 0.18000       |

| Departments | Age group | Not- overweight in 2005 | Overweight in 2005 | Obese in 2005 | Not- overweight in 2010 | Overweight in 2010 | Obese in 2010 |
|-------------|-----------|-------------------------|--------------------|---------------|-------------------------|--------------------|---------------|
|             | 55-59     | 0.44828                 | 0.37931            | 0.17241       | 0.37500                 | 0.42500            | 0.20000       |

**Table 107. Prevalent rates of middle socioeconomic status population by age group, and body mass index category (Pacifica region)**

| Departments   | Age group | Not- overweight in 2005 | Overweight in 2005 | Obese in 2005 | Not- overweight in 2010 | Overweight in 2010 | Obese in 2010 |
|---------------|-----------|-------------------------|--------------------|---------------|-------------------------|--------------------|---------------|
| Department 19 | 0-4       | 0.74359                 | 0.23077            | 0.02564       | 0.68354                 | 0.21519            | 0.10127       |
|               | 5-9       | 0.85714                 | 0.10714            | 0.03571       | 0.69014                 | 0.25352            | 0.05634       |
|               | 10-14     | 0.80769                 | 0.19231            | 0.00000       | 0.67500                 | 0.27500            | 0.05000       |
|               | 15-19     | 0.77143                 | 0.20000            | 0.02857       | 0.75510                 | 0.20408            | 0.04082       |
|               | 20-24     | 0.78378                 | 0.21622            | 0.00000       | 0.75000                 | 0.15625            | 0.09375       |
|               | 25-29     | 0.63158                 | 0.28947            | 0.07895       | 0.52239                 | 0.28358            | 0.19403       |
|               | 30-34     | 0.68000                 | 0.28000            | 0.04000       | 0.50769                 | 0.36923            | 0.12308       |
|               | 35-39     | 0.50000                 | 0.26923            | 0.23077       | 0.28571                 | 0.50000            | 0.21429       |
|               | 40-44     | 0.44000                 | 0.40000            | 0.16000       | 0.23404                 | 0.46809            | 0.29787       |
|               | 45-49     | 0.43478                 | 0.30435            | 0.26087       | 0.31481                 | 0.33333            | 0.35185       |
|               | 50-54     | 0.35294                 | 0.35294            | 0.29412       | 0.23529                 | 0.44118            | 0.32353       |
| 55-59         | 0.32000   | 0.40000                 | 0.28000            | 0.28947       | 0.42105                 | 0.28947            |               |
| Department 27 | 0-4       | 0.73684                 | 0.15789            | 0.10526       | 0.75000                 | 0.16667            | 0.08333       |
|               | 5-9       | 0.88889                 | 0.11111            | 0.00000       | 0.84615                 | 0.15385            | 0.00000       |
|               | 10-14     | 0.60000                 | 0.32000            | 0.08000       | 0.94737                 | 0.05263            | 0.00000       |
|               | 15-19     | 0.77778                 | 0.18519            | 0.03704       | 0.78947                 | 0.05263            | 0.15789       |
|               | 20-24     | 0.55172                 | 0.27586            | 0.17241       | 0.75000                 | 0.12500            | 0.12500       |
|               | 25-29     | 0.48571                 | 0.34286            | 0.17143       | 0.70588                 | 0.17647            | 0.11765       |
|               | 30-34     | 0.44828                 | 0.34483            | 0.20690       | 0.44444                 | 0.11111            | 0.44444       |
|               | 35-39     | 0.31818                 | 0.31818            | 0.36364       | 0.33333                 | 0.66667            | 0.00000       |
|               | 40-44     | 0.17391                 | 0.47826            | 0.34783       | 0.10000                 | 0.60000            | 0.30000       |
|               | 45-49     | 0.11111                 | 0.50000            | 0.38889       | 0.50000                 | 0.00000            | 0.50000       |
|               | 50-54     | 0.16667                 | 0.41667            | 0.41667       | 0.54545                 | 0.09091            | 0.36364       |
| 55-59         | 0.18182   | 0.18182                 | 0.63636            | 0.30000       | 0.40000                 | 0.30000            |               |
| Department 52 | 0-4       | 0.70909                 | 0.23636            | 0.05455       | 0.67143                 | 0.25714            | 0.07143       |
|               | 5-9       | 0.80645                 | 0.19355            | 0.00000       | 0.76087                 | 0.16304            | 0.07609       |
|               | 10-14     | 0.81579                 | 0.10526            | 0.07895       | 0.75000                 | 0.20370            | 0.04630       |
|               | 15-19     | 0.91892                 | 0.08108            | 0.00000       | 0.84810                 | 0.13924            | 0.01266       |
|               | 20-24     | 0.75610                 | 0.21951            | 0.02439       | 0.70423                 | 0.25352            | 0.04225       |
|               | 25-29     | 0.54902                 | 0.43137            | 0.01961       | 0.53750                 | 0.36250            | 0.10000       |
|               | 30-34     | 0.37255                 | 0.54902            | 0.07843       | 0.46875                 | 0.40625            | 0.12500       |
|               | 35-39     | 0.43902                 | 0.39024            | 0.17073       | 0.38554                 | 0.38554            | 0.22892       |
|               | 40-44     | 0.27027                 | 0.40541            | 0.32432       | 0.30159                 | 0.42857            | 0.26984       |
|               | 45-49     | 0.25000                 | 0.32143            | 0.42857       | 0.34848                 | 0.42424            | 0.22727       |
|               | 50-54     | 0.28000                 | 0.44000            | 0.28000       | 0.19444                 | 0.55556            | 0.25000       |
| 55-59         | 0.18519   | 0.37037                 | 0.44444            | 0.19355       | 0.35484                 | 0.45161            |               |
| Department 76 | 0-4       | 0.77576                 | 0.16970            | 0.05455       | 0.75102                 | 0.18367            | 0.06531       |
|               | 5-9       | 0.88750                 | 0.08750            | 0.02500       | 0.78226                 | 0.13710            | 0.08065       |
|               | 10-14     | 0.81928                 | 0.08434            | 0.09639       | 0.75899                 | 0.16906            | 0.07194       |
|               | 15-19     | 0.90816                 | 0.07143            | 0.02041       | 0.81423                 | 0.16996            | 0.01581       |

| Departments | Age group | Not- overweight in 2005 | Overweight in 2005 | Obese in 2005 | Not- overweight in 2010 | Overweight in 2010 | Obese in 2010 |
|-------------|-----------|-------------------------|--------------------|---------------|-------------------------|--------------------|---------------|
|             | 20-24     | 0.76331                 | 0.20118            | 0.03550       | 0.70588                 | 0.23039            | 0.06373       |
|             | 25-29     | 0.64138                 | 0.24138            | 0.11724       | 0.51905                 | 0.35238            | 0.12857       |
|             | 30-34     | 0.50000                 | 0.31746            | 0.18254       | 0.44388                 | 0.38265            | 0.17347       |
|             | 35-39     | 0.49074                 | 0.35185            | 0.15741       | 0.33784                 | 0.42568            | 0.23649       |
|             | 40-44     | 0.42593                 | 0.36111            | 0.21296       | 0.46875                 | 0.36250            | 0.16875       |
|             | 45-49     | 0.35065                 | 0.42857            | 0.22078       | 0.28448                 | 0.50000            | 0.21552       |
|             | 50-54     | 0.38272                 | 0.45679            | 0.16049       | 0.29839                 | 0.26613            | 0.43548       |
|             | 55-59     | 0.19512                 | 0.43902            | 0.36585       | 0.32558                 | 0.40698            | 0.26744       |

**Table 108. Prevalent rates of higher socioeconomic status population by age group, and body mass index category (Pacifica region)**

| Departments   | Age group | Not- overweight in 2005 | Overweight in 2005 | Obese in 2005 | Not- overweight in 2010 | Overweight in 2010 | Obese in 2010 |
|---------------|-----------|-------------------------|--------------------|---------------|-------------------------|--------------------|---------------|
| Department 19 | 0-4       | 0.63158                 | 0.31579            | 0.05263       | 0.58824                 | 0.35294            | 0.05882       |
|               | 5-9       | 0.74074                 | 0.14815            | 0.11111       | 0.76667                 | 0.10000            | 0.13333       |
|               | 10-14     | 0.79167                 | 0.16667            | 0.04167       | 0.74359                 | 0.15385            | 0.10256       |
|               | 15-19     | 0.75926                 | 0.20370            | 0.03704       | 0.77778                 | 0.14815            | 0.07407       |
|               | 20-24     | 0.78750                 | 0.20000            | 0.01250       | 0.78261                 | 0.17391            | 0.04348       |
|               | 25-29     | 0.76923                 | 0.17308            | 0.05769       | 0.70968                 | 0.25806            | 0.03226       |
|               | 30-34     | 0.52941                 | 0.41176            | 0.05882       | 0.32143                 | 0.50000            | 0.17857       |
|               | 35-39     | 0.49020                 | 0.35294            | 0.15686       | 0.58621                 | 0.27586            | 0.13793       |
|               | 40-44     | 0.47917                 | 0.43750            | 0.08333       | 0.34483                 | 0.55172            | 0.10345       |
|               | 45-49     | 0.25000                 | 0.44444            | 0.30556       | 0.40741                 | 0.40741            | 0.18519       |
|               | 50-54     | 0.30952                 | 0.42857            | 0.26190       | 0.26923                 | 0.46154            | 0.26923       |
| Department 52 | 0-4       | 0.29412                 | 0.47059            | 0.23529       | 0.21212                 | 0.51515            | 0.27273       |
|               | 5-9       | 0.78571                 | 0.17143            | 0.04286       | 0.78947                 | 0.21053            | 0.00000       |
|               | 10-14     | 0.68750                 | 0.21875            | 0.09375       | 0.76000                 | 0.20000            | 0.04000       |
|               | 15-19     | 0.80000                 | 0.16667            | 0.03333       | 0.71429                 | 0.23810            | 0.04762       |
|               | 20-24     | 0.80392                 | 0.15686            | 0.03922       | 0.91304                 | 0.08696            | 0.00000       |
|               | 25-29     | 0.78125                 | 0.18750            | 0.03125       | 0.75610                 | 0.17073            | 0.07317       |
|               | 30-34     | 0.54667                 | 0.38667            | 0.06667       | 0.60000                 | 0.40000            | 0.00000       |
|               | 35-39     | 0.45161                 | 0.41935            | 0.12903       | 0.44737                 | 0.47368            | 0.07895       |
|               | 40-44     | 0.31507                 | 0.60274            | 0.08219       | 0.43478                 | 0.21739            | 0.34783       |
|               | 45-49     | 0.30159                 | 0.53968            | 0.15873       | 0.21212                 | 0.48485            | 0.30303       |
|               | 50-54     | 0.21333                 | 0.41333            | 0.37333       | 0.24242                 | 0.54545            | 0.21212       |
| Department 76 | 55-59     | 0.31667                 | 0.40000            | 0.28333       | 0.18519                 | 0.55556            | 0.25926       |
|               | 0-4       | 0.17021                 | 0.40426            | 0.42553       | 0.09091                 | 0.50000            | 0.40909       |
|               | 5-9       | 0.75781                 | 0.17578            | 0.06641       | 0.75781                 | 0.17578            | 0.06641       |
|               | 10-14     | 0.73856                 | 0.16340            | 0.09804       | 0.73856                 | 0.16340            | 0.09804       |
|               | 15-19     | 0.80916                 | 0.12977            | 0.06107       | 0.80916                 | 0.12977            | 0.06107       |
|               | 20-24     | 0.77941                 | 0.19118            | 0.02941       | 0.77941                 | 0.19118            | 0.02941       |
|               | 25-29     | 0.78472                 | 0.16667            | 0.04861       | 0.78472                 | 0.16667            | 0.04861       |
| 30-34         | 0.60465   | 0.28682                 | 0.10853            | 0.60465       | 0.28682                 | 0.10853            |               |
|               | 35-34     | 0.52308                 | 0.31538            | 0.16154       | 0.52308                 | 0.31538            | 0.16154       |

| Departments | Age group | Not- overweight in 2005 | Overweight in 2005 | Obese in 2005 | Not- overweight in 2010 | Overweight in 2010 | Obese in 2010 |
|-------------|-----------|-------------------------|--------------------|---------------|-------------------------|--------------------|---------------|
|             | 35-39     | 0.40562                 | 0.41365            | 0.18072       | 0.40562                 | 0.41365            | 0.18072       |
|             | 40-44     | 0.31148                 | 0.46721            | 0.22131       | 0.31148                 | 0.46721            | 0.22131       |
|             | 45-49     | 0.27803                 | 0.49327            | 0.22870       | 0.27803                 | 0.49327            | 0.22870       |
|             | 50-54     | 0.28829                 | 0.44144            | 0.27027       | 0.28829                 | 0.44144            | 0.27027       |
|             | 55-59     | 0.31690                 | 0.41549            | 0.26761       | 0.31690                 | 0.41549            | 0.26761       |

**Table 109. Mortality rates and population size by age group at the department level without segregate by socioeconomic status (Pacifica region) †**

| Departments   | Age group | Mortality rates (R) (%/year) | Not- overweight population in 2005 (Number of people)1 | Overweight population in 2005 (Number of people)2 | Obese population in 2005 (Number of people)3 |
|---------------|-----------|------------------------------|--------------------------------------------------------|---------------------------------------------------|----------------------------------------------|
| Department 19 | 0-4       | 0.00309                      | 36437                                                  | 9360                                              | 2674                                         |
|               | 5-9       | 0.00028                      | 44819                                                  | 5681                                              | 2525                                         |
|               | 10-14     | 0.00024                      | 44884                                                  | 9107                                              | 650                                          |
|               | 15-19     | 0.00181                      | 40556                                                  | 8969                                              | 1170                                         |
|               | 20-24     | 0.00250                      | 37846                                                  | 9062                                              | 267                                          |
|               | 25-29     | 0.00302                      | 26260                                                  | 8550                                              | 3970                                         |
|               | 30-34     | 0.00294                      | 18296                                                  | 9148                                              | 3470                                         |
|               | 35-39     | 0.00275                      | 15428                                                  | 10285                                             | 4886                                         |
|               | 40-44     | 0.00321                      | 15055                                                  | 10316                                             | 3903                                         |
|               | 45-49     | 0.00387                      | 10094                                                  | 8466                                              | 6512                                         |
|               | 50-54     | 0.00425                      | 8229                                                   | 6818                                              | 5408                                         |
| 55-59         | 0.00776   | 4814                         | 6280                                                   | 3977                                              |                                              |
| Department 27 | 0-4       | 0.00440                      | 22963                                                  | 4886                                              | 1221                                         |
|               | 5-9       | 0.00059                      | 26607                                                  | 1996                                              | 0                                            |
|               | 10-14     | 0.00065                      | 22659                                                  | 5482                                              | 1096                                         |
|               | 15-19     | 0.00136                      | 23515                                                  | 3960                                              | 495                                          |
|               | 20-24     | 0.00206                      | 13767                                                  | 4283                                              | 1836                                         |
|               | 25-29     | 0.00235                      | 8285                                                   | 4634                                              | 2387                                         |
|               | 30-34     | 0.00185                      | 5809                                                   | 4420                                              | 1642                                         |
|               | 35-39     | 0.00216                      | 4900                                                   | 3708                                              | 2516                                         |
|               | 40-44     | 0.00200                      | 3016                                                   | 3650                                              | 3333                                         |
|               | 45-49     | 0.00381                      | 1573                                                   | 4719                                              | 2904                                         |
|               | 50-54     | 0.00436                      | 1608                                                   | 2787                                              | 2251                                         |
| 55-59         | 0.00591   | 1044                         | 1983                                                   | 1879                                              |                                              |
| Department 52 | 0-4       | 0.00270                      | 52291                                                  | 13842                                             | 5383                                         |
|               | 5-9       | 0.00015                      | 55525                                                  | 13881                                             | 4083                                         |
|               | 10-14     | 0.00019                      | 62976                                                  | 7409                                              | 3704                                         |
|               | 15-19     | 0.00074                      | 63642                                                  | 7590                                              | 1752                                         |
|               | 20-24     | 0.00147                      | 53883                                                  | 13574                                             | 2057                                         |
|               | 25-29     | 0.00133                      | 33581                                                  | 22157                                             | 3808                                         |
|               | 30-34     | 0.00144                      | 20726                                                  | 23144                                             | 4836                                         |
|               | 35-39     | 0.00134                      | 19595                                                  | 23514                                             | 6205                                         |
| 40-44         | 0.00181   | 13464                        | 20196                                                  | 9425                                              |                                              |



| Departments   | Age group | Mortality rates (R) (%/year) | Not- overweight population in 2005 (Number of people) <sup>1</sup> | Overweight population in 2005 (Number of people) <sup>2</sup> | Obese population in 2005 (Number of people) <sup>3</sup> |
|---------------|-----------|------------------------------|--------------------------------------------------------------------|---------------------------------------------------------------|----------------------------------------------------------|
|               | 45-49     | 0.00200                      | 8963                                                               | 13308                                                         | 13308                                                    |
|               | 50-54     | 0.00261                      | 10100                                                              | 10678                                                         | 8369                                                     |
|               | 55-59     | 0.00450                      | 5403                                                               | 8491                                                          | 9006                                                     |
| Department 76 | 0-4       | 0.00269                      | 240302                                                             | 49293                                                         | 16244                                                    |
|               | 5-9       | 0.00025                      | 265413                                                             | 43840                                                         | 21328                                                    |
|               | 10-14     | 0.00035                      | 292694                                                             | 34814                                                         | 20630                                                    |
|               | 15-19     | 0.00196                      | 278955                                                             | 49227                                                         | 9116                                                     |
|               | 20-24     | 0.00299                      | 248696                                                             | 54876                                                         | 14011                                                    |
|               | 25-29     | 0.00317                      | 181222                                                             | 78792                                                         | 30911                                                    |
|               | 30-34     | 0.00298                      | 140126                                                             | 79819                                                         | 45526                                                    |
|               | 35-39     | 0.00280                      | 120509                                                             | 102018                                                        | 45270                                                    |
|               | 40-44     | 0.00298                      | 91932                                                              | 111415                                                        | 52968                                                    |
|               | 45-49     | 0.00373                      | 68100                                                              | 99963                                                         | 45608                                                    |
|               | 50-54     | 0.00562                      | 58095                                                              | 74622                                                         | 40065                                                    |
| 55-59         | 0.00749   | 41714                        | 55618                                                              | 36657                                                         |                                                          |

†Values used in this table are for the urban population

<sup>1</sup> Initial value used in the stock of not-overweight population in 2005.

<sup>2</sup> Initial value used in the stock of overweight population in 2005.

<sup>3</sup> Initial value used in the stock of obese population in 2005.

**Table 110. Mortality rates and population size by age group at the department level for the lower socioeconomic status population (Pacifica region) †**

| Departments   | Age group | Mortality rates (R) (%/year) | Not- overweight population in 2005 (Number of people) <sup>1</sup> | Overweight population in 2005 (Number of people) <sup>2</sup> | Obese population in 2005 (Number of people) <sup>3</sup> |
|---------------|-----------|------------------------------|--------------------------------------------------------------------|---------------------------------------------------------------|----------------------------------------------------------|
| Department 19 | 0-4       | 0.00309                      | 18720                                                              | 2340                                                          | 1671                                                     |
|               | 5-9       | 0.00028                      | 17044                                                              | 1263                                                          | 0                                                        |
|               | 10-14     | 0.00024                      | 18864                                                              | 3252                                                          | 0                                                        |
|               | 15-19     | 0.00181                      | 14039                                                              | 1950                                                          | 0                                                        |
|               | 20-24     | 0.00250                      | 13326                                                              | 2665                                                          | 0                                                        |
|               | 25-29     | 0.00302                      | 6718                                                               | 2443                                                          | 2137                                                     |
|               | 30-34     | 0.00294                      | 7255                                                               | 2524                                                          | 2524                                                     |
|               | 35-39     | 0.00275                      | 5657                                                               | 3857                                                          | 1286                                                     |
|               | 40-44     | 0.00321                      | 5576                                                               | 1673                                                          | 1673                                                     |
|               | 45-49     | 0.00387                      | 3907                                                               | 977                                                           | 977                                                      |
|               | 50-54     | 0.00425                      | 3762                                                               | 1176                                                          | 1646                                                     |
| Department 27 | 0-4       | 0.00440                      | 5388                                                               | 1030                                                          | 238                                                      |
|               | 5-9       | 0.00059                      | 4569                                                               | 147                                                           | 0                                                        |
|               | 10-14     | 0.00065                      | 5053                                                               | 884                                                           | 126                                                      |
|               | 15-19     | 0.00136                      | 4382                                                               | 674                                                           | 84                                                       |
|               | 20-24     | 0.00206                      | 2375                                                               | 564                                                           | 242                                                      |
|               | 25-29     | 0.00235                      | 1548                                                               | 534                                                           | 374                                                      |
|               | 30-34     | 0.00185                      | 961                                                                | 577                                                           | 128                                                      |

| Departments   | Age group | Mortality rates (R) (%/year) | Not- overweight population in 2005 (Number of people) <sup>1</sup> | Overweight population in 2005 (Number of people) <sup>2</sup> | Obese population in 2005 (Number of people) <sup>3</sup> |
|---------------|-----------|------------------------------|--------------------------------------------------------------------|---------------------------------------------------------------|----------------------------------------------------------|
|               | 35-39     | 0.00216                      | 904                                                                | 521                                                           | 243                                                      |
|               | 40-44     | 0.00200                      | 678                                                                | 509                                                           | 452                                                      |
|               | 45-49     | 0.00381                      | 264                                                                | 529                                                           | 336                                                      |
|               | 50-54     | 0.00436                      | 231                                                                | 405                                                           | 173                                                      |
|               | 55-59     | 0.00591                      | 175                                                                | 292                                                           | 204                                                      |
| Department 52 | 0-4       | 0.00270                      | 16149                                                              | 4229                                                          | 3076                                                     |
|               | 5-9       | 0.00015                      | 17147                                                              | 3266                                                          | 1633                                                     |
|               | 10-14     | 0.00019                      | 22227                                                              | 741                                                           | 741                                                      |
|               | 15-19     | 0.00074                      | 19852                                                              | 1168                                                          | 584                                                      |
|               | 20-24     | 0.00147                      | 10283                                                              | 2468                                                          | 411                                                      |
|               | 25-29     | 0.00133                      | 9694                                                               | 4501                                                          | 1731                                                     |
|               | 30-34     | 0.00144                      | 4491                                                               | 4491                                                          | 691                                                      |
|               | 35-39     | 0.00134                      | 6205                                                               | 3919                                                          | 1960                                                     |
|               | 40-44     | 0.00181                      | 3703                                                               | 3703                                                          | 2020                                                     |
|               | 45-49     | 0.00200                      | 2716                                                               | 2444                                                          | 2444                                                     |
|               | 50-54     | 0.00261                      | 2597                                                               | 577                                                           | 1443                                                     |
| 55-59         | 0.00450   | 2058                         | 1029                                                               | 772                                                           |                                                          |
| Department 76 | 0-4       | 0.00269                      | 59935                                                              | 8402                                                          | 1680                                                     |
|               | 5-9       | 0.00025                      | 47395                                                              | 5924                                                          | 1185                                                     |
|               | 10-14     | 0.00035                      | 68338                                                              | 3868                                                          | 0                                                        |
|               | 15-19     | 0.00196                      | 52874                                                              | 7293                                                          | 1823                                                     |
|               | 20-24     | 0.00299                      | 41449                                                              | 7006                                                          | 2335                                                     |
|               | 25-29     | 0.00317                      | 30305                                                              | 12728                                                         | 3637                                                     |
|               | 30-34     | 0.00298                      | 22467                                                              | 7686                                                          | 7095                                                     |
|               | 35-39     | 0.00280                      | 22316                                                              | 12115                                                         | 5739                                                     |
|               | 40-44     | 0.00298                      | 17656                                                              | 18265                                                         | 6088                                                     |
|               | 45-49     | 0.00373                      | 12495                                                              | 10621                                                         | 3124                                                     |
|               | 50-54     | 0.00562                      | 10517                                                              | 7011                                                          | 3506                                                     |
|               | 55-59     | 0.00749                      | 8216                                                               | 6952                                                          | 3160                                                     |

†Values used in this table are for the urban population

<sup>1</sup> Initial value used in the stock of not-overweight population in 2005 for lower SES.

<sup>2</sup> Initial value used in the stock of overweight population in 2005 for lower SES.

<sup>3</sup> Initial value used in the stock of obese population in 2005 for lower SES.

**Table 111. Mortality rates and population size by age group at the department level for the middle socioeconomic status population (Pacifica region) †**

| Departments   | Age group | Mortality rates (R) (%/year) | Not- overweight population in 2005 (Number of people) <sup>1</sup> | Overweight population in 2005 (Number of people) <sup>2</sup> | Obese population in 2005 (Number of people) <sup>3</sup> |
|---------------|-----------|------------------------------|--------------------------------------------------------------------|---------------------------------------------------------------|----------------------------------------------------------|
| Department 19 | 0-4       | 0.00309                      | 9694                                                               | 3009                                                          | 334                                                      |
|               | 5-9       | 0.00028                      | 15150                                                              | 1894                                                          | 631                                                      |
|               | 10-14     | 0.00024                      | 13660                                                              | 3252                                                          | 0                                                        |
|               | 15-19     | 0.00181                      | 10529                                                              | 2730                                                          | 390                                                      |
|               | 20-24     | 0.00250                      | 7729                                                               | 2132                                                          | 0                                                        |

| Departments   | Age group | Mortality rates (R) (%/year) | Not- overweight population in 2005 (Number of people)1 | Overweight population in 2005 (Number of people)2 | Obese population in 2005 (Number of people)3 |
|---------------|-----------|------------------------------|--------------------------------------------------------|---------------------------------------------------|----------------------------------------------|
|               | 25-29     | 0.00302                      | 7329                                                   | 3359                                              | 916                                          |
|               | 30-34     | 0.00294                      | 5363                                                   | 2208                                              | 315                                          |
|               | 35-39     | 0.00275                      | 3343                                                   | 1800                                              | 1543                                         |
|               | 40-44     | 0.00321                      | 3067                                                   | 2788                                              | 1115                                         |
|               | 45-49     | 0.00387                      | 3256                                                   | 2279                                              | 1954                                         |
|               | 50-54     | 0.00425                      | 1411                                                   | 1411                                              | 1176                                         |
|               | 55-59     | 0.00776                      | 1675                                                   | 2093                                              | 1465                                         |
| Department 27 | 0-4       | 0.00440                      | 6473                                                   | 1387                                              | 925                                          |
|               | 5-9       | 0.00059                      | 7290                                                   | 911                                               | 0                                            |
|               | 10-14     | 0.00065                      | 5393                                                   | 2876                                              | 719                                          |
|               | 15-19     | 0.00136                      | 5762                                                   | 1372                                              | 274                                          |
|               | 20-24     | 0.00206                      | 3408                                                   | 1704                                              | 1065                                         |
|               | 25-29     | 0.00235                      | 2246                                                   | 1585                                              | 793                                          |
|               | 30-34     | 0.00185                      | 1493                                                   | 1149                                              | 689                                          |
|               | 35-39     | 0.00216                      | 910                                                    | 910                                               | 1040                                         |
|               | 40-44     | 0.00200                      | 446                                                    | 1227                                              | 892                                          |
|               | 45-49     | 0.00381                      | 230                                                    | 1035                                              | 805                                          |
|               | 50-54     | 0.00436                      | 260                                                    | 650                                               | 650                                          |
|               | 55-59     | 0.00591                      | 173                                                    | 173                                               | 604                                          |
| Department 52 | 0-4       | 0.00270                      | 14995                                                  | 4998                                              | 1153                                         |
|               | 5-9       | 0.00015                      | 20414                                                  | 4899                                              | 0                                            |
|               | 10-14     | 0.00019                      | 22968                                                  | 2964                                              | 2223                                         |
|               | 15-19     | 0.00074                      | 19852                                                  | 1752                                              | 0                                            |
|               | 20-24     | 0.00147                      | 12751                                                  | 3702                                              | 411                                          |
|               | 25-29     | 0.00133                      | 9694                                                   | 7616                                              | 346                                          |
|               | 30-34     | 0.00144                      | 6563                                                   | 9672                                              | 1382                                         |
|               | 35-39     | 0.00134                      | 5879                                                   | 5225                                              | 2286                                         |
|               | 40-44     | 0.00181                      | 3366                                                   | 5049                                              | 4039                                         |
|               | 45-49     | 0.00200                      | 1901                                                   | 2444                                              | 3259                                         |
|               | 50-54     | 0.00261                      | 2020                                                   | 3174                                              | 2020                                         |
|               | 55-59     | 0.00450                      | 1287                                                   | 2573                                              | 3088                                         |
| Department 76 | 0-4       | 0.00269                      | 71699                                                  | 15684                                             | 5041                                         |
|               | 5-9       | 0.00025                      | 84126                                                  | 8294                                              | 2370                                         |
|               | 10-14     | 0.00035                      | 87679                                                  | 9026                                              | 10315                                        |
|               | 15-19     | 0.00196                      | 81134                                                  | 6381                                              | 1823                                         |
|               | 20-24     | 0.00299                      | 75309                                                  | 19849                                             | 3503                                         |
|               | 25-29     | 0.00317                      | 56367                                                  | 21213                                             | 10304                                        |
|               | 30-34     | 0.00298                      | 37249                                                  | 23650                                             | 13599                                        |
|               | 35-39     | 0.00280                      | 33793                                                  | 24229                                             | 10839                                        |
|               | 40-44     | 0.00298                      | 28006                                                  | 23744                                             | 14003                                        |
|               | 45-49     | 0.00373                      | 16869                                                  | 20617                                             | 10621                                        |
|               | 50-54     | 0.00562                      | 15525                                                  | 18530                                             | 6511                                         |
|               | 55-59     | 0.00749                      | 5056                                                   | 11376                                             | 9480                                         |

†Values used in this table are for the urban population

1 Initial value used in the stock of not-overweight population in 2005 for middle SES.

2 Initial value used in the stock of overweight population in 2005 for middle SES.

3 Initial value used in the stock of obese population in 2005 for middle SES.

**Table 112. Mortality rates and population size by age group at the department level for the higher socioeconomic status population (Pacifica region) †**

| Departments   | Age group | Mortality rates (R) (%/year) | Not- overweight population in 2005 (Number of people) <sup>1</sup> | Overweight population in 2005 (Number of people) <sup>2</sup> | Obese population in 2005 (Number of people) <sup>3</sup> |
|---------------|-----------|------------------------------|--------------------------------------------------------------------|---------------------------------------------------------------|----------------------------------------------------------|
| Department 19 | 0-4       | 0.00309                      | 8023                                                               | 4011                                                          | 669                                                      |
|               | 5-9       | 0.00028                      | 12625                                                              | 2525                                                          | 1894                                                     |
|               | 10-14     | 0.00024                      | 12359                                                              | 2602                                                          | 650                                                      |
|               | 15-19     | 0.00181                      | 15988                                                              | 4290                                                          | 780                                                      |
|               | 20-24     | 0.00250                      | 16791                                                              | 4264                                                          | 267                                                      |
|               | 25-29     | 0.00302                      | 12214                                                              | 2748                                                          | 916                                                      |
|               | 30-34     | 0.00294                      | 5678                                                               | 4416                                                          | 631                                                      |
|               | 35-39     | 0.00275                      | 6428                                                               | 4628                                                          | 2057                                                     |
|               | 40-44     | 0.00321                      | 6412                                                               | 5855                                                          | 1115                                                     |
|               | 45-49     | 0.00387                      | 2931                                                               | 5210                                                          | 3582                                                     |
|               | 50-54     | 0.00425                      | 3056                                                               | 4232                                                          | 2586                                                     |
|               | 55-59     | 0.00776                      | 2093                                                               | 3349                                                          | 1675                                                     |
| Department 52 | 0-4       | 0.00270                      | 21147                                                              | 4614                                                          | 1153                                                     |
|               | 5-9       | 0.00015                      | 17964                                                              | 5716                                                          | 2450                                                     |
|               | 10-14     | 0.00019                      | 17781                                                              | 3704                                                          | 741                                                      |
|               | 15-19     | 0.00074                      | 23939                                                              | 4671                                                          | 1168                                                     |
|               | 20-24     | 0.00147                      | 30849                                                              | 7404                                                          | 1234                                                     |
|               | 25-29     | 0.00133                      | 14194                                                              | 10040                                                         | 1731                                                     |
|               | 30-34     | 0.00144                      | 9672                                                               | 8981                                                          | 2763                                                     |
|               | 35-39     | 0.00134                      | 7512                                                               | 14370                                                         | 1960                                                     |
|               | 40-44     | 0.00181                      | 6395                                                               | 11444                                                         | 3366                                                     |
|               | 45-49     | 0.00200                      | 4346                                                               | 8419                                                          | 7605                                                     |
|               | 50-54     | 0.00261                      | 5483                                                               | 6926                                                          | 4906                                                     |
|               | 55-59     | 0.00450                      | 2058                                                               | 4889                                                          | 5146                                                     |
| Department 76 | 0-4       | 0.00269                      | 108668                                                             | 25207                                                         | 9522                                                     |
|               | 5-9       | 0.00025                      | 133891                                                             | 29622                                                         | 17773                                                    |
|               | 10-14     | 0.00035                      | 136676                                                             | 21920                                                         | 10315                                                    |
|               | 15-19     | 0.00196                      | 144947                                                             | 35553                                                         | 5470                                                     |
|               | 20-24     | 0.00299                      | 131937                                                             | 28022                                                         | 8173                                                     |
|               | 25-29     | 0.00317                      | 94551                                                              | 44851                                                         | 16971                                                    |
|               | 30-34     | 0.00298                      | 80410                                                              | 48482                                                         | 24832                                                    |
|               | 35-39     | 0.00280                      | 64399                                                              | 65674                                                         | 28693                                                    |
|               | 40-44     | 0.00298                      | 46271                                                              | 69406                                                         | 32877                                                    |
| 45-49         | 0.00373   | 38735                        | 68724                                                              | 31863                                                         |                                                          |

| Departments | Age group | Mortality rates (R) (%/year) | Not- overweight population in 2005 (Number of people) <sup>1</sup> | Overweight population in 2005 (Number of people) <sup>2</sup> | Obese population in 2005 (Number of people) <sup>3</sup> |
|-------------|-----------|------------------------------|--------------------------------------------------------------------|---------------------------------------------------------------|----------------------------------------------------------|
|             | 50-54     | 0.00562                      | 32052                                                              | 49080                                                         | 30049                                                    |
|             | 55-59     | 0.00749                      | 28441                                                              | 37289                                                         | 24017                                                    |

†Values used in this table are for the urban population

<sup>1</sup> Initial value used in the stock of not-overweight population in 2005 for higher SES.

<sup>2</sup> Initial value used in the stock of overweight population in 2005 for higher SES.

<sup>3</sup> Initial value used in the stock of obese population in 2005 for higher SES.

## 1.5 Bogotá

### 1.5.1 Data and model parameters used

**Table 113. Prevalent rates of entire population by age group, sex, and body mass index category in 2005 (Bogotá)**

| Age Group | Nutritional State Male |           |         | Nutritional State Female |           |         |
|-----------|------------------------|-----------|---------|--------------------------|-----------|---------|
|           | Not-Overweigh          | Overweigh | Obese   | Not-Overweigh            | Overweigh | Obese   |
| 0-4       | 0.73188                | 0.21377   | 0.05435 | 0.74203                  | 0.20580   | 0.05217 |
| 5-9       | 0.82781                | 0.13245   | 0.03974 | 0.74675                  | 0.20779   | 0.04545 |
| 10-14     | 0.81197                | 0.13675   | 0.05128 | 0.82313                  | 0.16327   | 0.01361 |
| 15-19     | 0.89051                | 0.10219   | 0.00730 | 0.77340                  | 0.20197   | 0.02463 |
| 20-24     | 0.81780                | 0.14407   | 0.03814 | 0.71429                  | 0.24490   | 0.04082 |
| 25-29     | 0.67164                | 0.29851   | 0.02985 | 0.64537                  | 0.28435   | 0.07029 |
| 30-34     | 0.58599                | 0.36306   | 0.05096 | 0.54198                  | 0.32443   | 0.13359 |
| 35-39     | 0.50365                | 0.38686   | 0.10949 | 0.43798                  | 0.36822   | 0.19380 |
| 40-44     | 0.43511                | 0.44275   | 0.12214 | 0.38956                  | 0.42169   | 0.18876 |
| 45-49     | 0.35433                | 0.52756   | 0.11811 | 0.24180                  | 0.49180   | 0.26639 |
| 50-54     | 0.35000                | 0.46000   | 0.19000 | 0.22632                  | 0.43158   | 0.34211 |
| 55-59     | 0.41026                | 0.46154   | 0.12821 | 0.24800                  | 0.37600   | 0.37600 |

**Table 114. Prevalent rates of lower socioeconomic status population by age group, sex, and body mass index category in 2005 (Bogotá)**

| Age Group | Nutritional State Male |           |         | Nutritional State Female |           |         |
|-----------|------------------------|-----------|---------|--------------------------|-----------|---------|
|           | Not-Overweigh          | Overweigh | Obese   | Not-Overweigh            | Overweigh | Obese   |
| 0-4       | 0.68519                | 0.24074   | 0.07407 | 0.72727                  | 0.22727   | 0.04545 |
| 5-9       | 1.00000                | 0.00000   | 0.00000 | 0.64706                  | 0.29412   | 0.05882 |
| 10-14     | 1.00000                | 0.00000   | 0.00000 | 1.00000                  | 0.00000   | 0.00000 |
| 15-19     | 1.00000                | 0.00000   | 0.00000 | 0.76923                  | 0.23077   | 0.00000 |
| 20-24     | 0.82759                | 0.17241   | 0.00000 | 0.78846                  | 0.21154   | 0.00000 |
| 25-29     | 0.73077                | 0.23077   | 0.03846 | 0.58621                  | 0.31034   | 0.10345 |
| 30-34     | 0.46154                | 0.53846   | 0.00000 | 0.54167                  | 0.33333   | 0.12500 |
| 35-39     | 0.57143                | 0.35714   | 0.07143 | 0.41176                  | 0.38235   | 0.20588 |
| 40-44     | 0.64286                | 0.21429   | 0.14286 | 0.25000                  | 0.58333   | 0.16667 |
| 45-49     | 0.55556                | 0.44444   | 0.00000 | 0.52632                  | 0.36842   | 0.10526 |
| 50-54     | 0.58333                | 0.33333   | 0.08333 | 0.28571                  | 0.28571   | 0.42857 |

|       |         |         |         |         |         |         |
|-------|---------|---------|---------|---------|---------|---------|
| 55-59 | 0.50000 | 0.00000 | 0.50000 | 0.50000 | 0.50000 | 0.00000 |
|-------|---------|---------|---------|---------|---------|---------|

**Table 115. Prevalent rates of middle socioeconomic status population by age group, sex, and body mass index category in 2005 (Bogotá)**

| Age Group | Nutritional State Male |           |         | Nutritional State Female |           |         |
|-----------|------------------------|-----------|---------|--------------------------|-----------|---------|
|           | Not- Overweigh         | Overweigh | Obese   | Not-Overweigh            | Overweigh | Obese   |
| 0-4       | 0.76623                | 0.19481   | 0.03896 | 0.72477                  | 0.22936   | 0.04587 |
| 5-9       | 0.83333                | 0.14286   | 0.02381 | 0.73529                  | 0.23529   | 0.02941 |
| 10-14     | 0.87500                | 0.12500   | 0.00000 | 0.75000                  | 0.22500   | 0.02500 |
| 15-19     | 0.93333                | 0.06667   | 0.00000 | 0.64583                  | 0.29167   | 0.06250 |
| 20-24     | 0.83333                | 0.11111   | 0.05556 | 0.67073                  | 0.26829   | 0.06098 |
| 25-29     | 0.68182                | 0.31818   | 0.00000 | 0.60000                  | 0.33684   | 0.06316 |
| 30-34     | 0.69697                | 0.30303   | 0.00000 | 0.58929                  | 0.32143   | 0.08929 |
| 35-39     | 0.51852                | 0.29630   | 0.18519 | 0.42623                  | 0.40984   | 0.16393 |
| 40-44     | 0.66667                | 0.29630   | 0.03704 | 0.44444                  | 0.53333   | 0.02222 |
| 45-49     | 0.30769                | 0.46154   | 0.23077 | 0.22222                  | 0.46667   | 0.31111 |
| 50-54     | 0.35714                | 0.50000   | 0.14286 | 0.15385                  | 0.33333   | 0.51282 |
| 55-59     | 0.38462                | 0.46154   | 0.15385 | 0.36364                  | 0.36364   | 0.27273 |

**Table 116. Prevalent rates of higher socioeconomic status population by age group, sex, and body mass index category in 2005 (Bogotá)**

| Age Group | Nutritional State Male |           |         | Nutritional State Female |           |         |
|-----------|------------------------|-----------|---------|--------------------------|-----------|---------|
|           | Not-Overweigh          | Overweigh | Obese   | Not-Overweigh            | Overweigh | Obese   |
| 0-4       | 0.73103                | 0.21379   | 0.05517 | 0.75882                  | 0.18235   | 0.05882 |
| 5-9       | 0.79787                | 0.14894   | 0.05319 | 0.76699                  | 0.18447   | 0.04854 |
| 10-14     | 0.75000                | 0.16667   | 0.08333 | 0.83505                  | 0.15464   | 0.01031 |
| 15-19     | 0.85870                | 0.13043   | 0.01087 | 0.81690                  | 0.16901   | 0.01408 |
| 20-24     | 0.81046                | 0.15033   | 0.03922 | 0.71292                  | 0.24402   | 0.04306 |
| 25-29     | 0.65649                | 0.30534   | 0.03817 | 0.67725                  | 0.25397   | 0.06878 |
| 30-34     | 0.56757                | 0.36036   | 0.07207 | 0.52747                  | 0.32418   | 0.14835 |
| 35-39     | 0.48958                | 0.41667   | 0.09375 | 0.44785                  | 0.34969   | 0.20245 |
| 40-44     | 0.33333                | 0.52222   | 0.14444 | 0.38542                  | 0.38542   | 0.22917 |
| 45-49     | 0.34783                | 0.55435   | 0.09783 | 0.21667                  | 0.51111   | 0.27222 |
| 50-54     | 0.31081                | 0.47297   | 0.21622 | 0.24306                  | 0.46528   | 0.29167 |
| 55-59     | 0.41270                | 0.47619   | 0.11111 | 0.21782                  | 0.37624   | 0.40594 |

**Table 117. Prevalent rates of entire population by age group, sex, and body mass index category in 2010 (Bogotá)**

| Age Group | Nutritional State Male |           |         | Nutritional State Female |           |         |
|-----------|------------------------|-----------|---------|--------------------------|-----------|---------|
|           | Not-Overweigh          | Overweigh | Obese   | Not-Overweigh            | Overweigh | Obese   |
| 0-4       | 0.69499                | 0.23747   | 0.06754 | 0.72785                  | 0.21308   | 0.05907 |
| 5-9       | 0.72990                | 0.15876   | 0.11134 | 0.74215                  | 0.20404   | 0.05381 |
| 10-14     | 0.75618                | 0.18198   | 0.06184 | 0.75388                  | 0.21705   | 0.02907 |
| 15-19     | 0.88367                | 0.10067   | 0.01566 | 0.78835                  | 0.17476   | 0.03689 |
| 20-24     | 0.79200                | 0.17333   | 0.03467 | 0.72187                  | 0.22293   | 0.05520 |

| Age Group | Nutritional State Male |           |         | Nutritional State Female |           |         |
|-----------|------------------------|-----------|---------|--------------------------|-----------|---------|
|           | Not-Overweigh          | Overweigh | Obese   | Not-Overweigh            | Overweigh | Obese   |
| 25-29     | 0.61538                | 0.29808   | 0.08654 | 0.61483                  | 0.29426   | 0.09091 |
| 30-34     | 0.50996                | 0.39044   | 0.09960 | 0.53598                  | 0.36228   | 0.10174 |
| 35-39     | 0.45652                | 0.43841   | 0.10507 | 0.45340                  | 0.41310   | 0.13350 |
| 40-44     | 0.41107                | 0.45455   | 0.13439 | 0.36203                  | 0.45316   | 0.18481 |
| 45-49     | 0.33929                | 0.48214   | 0.17857 | 0.30296                  | 0.46925   | 0.22779 |
| 50-54     | 0.34197                | 0.49741   | 0.16062 | 0.27640                  | 0.48447   | 0.23913 |
| 55-59     | 0.30519                | 0.47403   | 0.22078 | 0.20248                  | 0.41322   | 0.38430 |

**Table 118. Prevalent rates of lower socioeconomic status population by age group, sex, and body mass index category in 2010 (Bogotá)**

| Age Group | Nutritional State Male |           |         | Nutritional State Female |           |         |
|-----------|------------------------|-----------|---------|--------------------------|-----------|---------|
|           | Not-Overweigh          | Overweigh | Obese   | Not-Overweigh            | Overweigh | Obese   |
| 0-4       | 0.56000                | 0.32000   | 0.12000 | 0.68966                  | 0.24138   | 0.06897 |
| 5-9       | 0.77419                | 0.19355   | 0.03226 | 0.84211                  | 0.15789   | 0.00000 |
| 10-14     | 0.94444                | 0.05556   | 0.00000 | 0.87500                  | 0.12500   | 0.00000 |
| 15-19     | 0.93750                | 0.06250   | 0.00000 | 0.84211                  | 0.10526   | 0.05263 |
| 20-24     | 0.86667                | 0.13333   | 0.00000 | 0.75000                  | 0.16667   | 0.08333 |
| 25-29     | 0.62500                | 0.37500   | 0.00000 | 0.68182                  | 0.18182   | 0.13636 |
| 30-34     | 0.90000                | 0.10000   | 0.00000 | 0.45455                  | 0.45455   | 0.09091 |
| 35-39     | 0.66667                | 0.33333   | 0.00000 | 0.54545                  | 0.18182   | 0.27273 |
| 40-44     | 0.40000                | 0.20000   | 0.40000 | 0.28571                  | 0.71429   | 0.00000 |
| 45-49     | 0.50000                | 0.37500   | 0.12500 | 0.23077                  | 0.38462   | 0.38462 |
| 50-54     | 0.71429                | 0.28571   | 0.00000 | 1.00000                  | 0.00000   | 0.00000 |
| 55-59     | 0.50000                | 0.50000   | 0.00000 | 0.00000                  | 0.40000   | 0.60000 |

**Table 119. Prevalent rates of middle socioeconomic status population by age group, sex, and body mass index category in 2010 (Bogotá)**

| Age Group | Nutritional State Male |           |         | Nutritional State Female |           |         |
|-----------|------------------------|-----------|---------|--------------------------|-----------|---------|
|           | Not-Overweigh          | Overweigh | Obese   | Not-Overweigh            | Overweigh | Obese   |
| 0-4       | 0.69925                | 0.23308   | 0.06767 | 0.81746                  | 0.11905   | 0.06349 |
| 5-9       | 0.75258                | 0.11340   | 0.13402 | 0.76724                  | 0.18966   | 0.04310 |
| 10-14     | 0.81301                | 0.16260   | 0.02439 | 0.78788                  | 0.18182   | 0.03030 |
| 15-19     | 0.94203                | 0.04348   | 0.01449 | 0.75000                  | 0.24107   | 0.00893 |
| 20-24     | 0.82278                | 0.13924   | 0.03797 | 0.71963                  | 0.22430   | 0.05607 |
| 25-29     | 0.72941                | 0.20000   | 0.07059 | 0.53846                  | 0.37363   | 0.08791 |
| 30-34     | 0.57143                | 0.38776   | 0.04082 | 0.51250                  | 0.37500   | 0.11250 |
| 35-39     | 0.51923                | 0.42308   | 0.05769 | 0.48438                  | 0.34375   | 0.17188 |
| 40-44     | 0.48980                | 0.42857   | 0.08163 | 0.32394                  | 0.43662   | 0.23944 |
| 45-49     | 0.53125                | 0.34375   | 0.12500 | 0.38806                  | 0.40299   | 0.20896 |
| 50-54     | 0.36364                | 0.48485   | 0.15152 | 0.28947                  | 0.47368   | 0.23684 |
| 55-59     | 0.33333                | 0.52381   | 0.14286 | 0.21429                  | 0.21429   | 0.57143 |

**Table 120. Prevalent rates of higher socioeconomic status population by age group, sex, and body mass index category in 2010 (Bogotá)**

| Age Group | Nutritional State Male |           |         | Nutritional State Female |           |         |
|-----------|------------------------|-----------|---------|--------------------------|-----------|---------|
|           | Not-Overweigh          | Overweigh | Obese   | Not-Overweigh            | Overweigh | Obese   |
| 0-4       | 0.70432                | 0.23256   | 0.06312 | 0.69592                  | 0.24765   | 0.05643 |
| 5-9       | 0.71989                | 0.16807   | 0.11204 | 0.72669                  | 0.21222   | 0.06109 |
| 10-14     | 0.73176                | 0.19294   | 0.07529 | 0.73333                  | 0.23611   | 0.03056 |
| 15-19     | 0.87017                | 0.11326   | 0.01657 | 0.79688                  | 0.15885   | 0.04427 |
| 20-24     | 0.77936                | 0.18505   | 0.03559 | 0.72059                  | 0.22647   | 0.05294 |
| 25-29     | 0.57078                | 0.33333   | 0.09589 | 0.63279                  | 0.27869   | 0.08852 |
| 30-34     | 0.47396                | 0.40625   | 0.11979 | 0.54487                  | 0.35577   | 0.09936 |
| 35-39     | 0.43578                | 0.44495   | 0.11927 | 0.44410                  | 0.43478   | 0.12112 |
| 40-44     | 0.39196                | 0.46734   | 0.14070 | 0.37224                  | 0.45110   | 0.17666 |
| 45-49     | 0.29891                | 0.51087   | 0.19022 | 0.28969                  | 0.48468   | 0.22563 |
| 50-54     | 0.32026                | 0.50980   | 0.16993 | 0.26950                  | 0.48936   | 0.24113 |
| 55-59     | 0.29771                | 0.46565   | 0.23664 | 0.20574                  | 0.44019   | 0.35407 |

**Table 121. Fraction of births for men by body mass index category, and socioeconomic status (Bogotá) †**

| Population group | Lower SES (%/year) | Middle SES (%/year) | Higher SES (%/year) | Complete Urban Population (%/year) |
|------------------|--------------------|---------------------|---------------------|------------------------------------|
| Not- overweight  | 50,00%             | 77,27%              | 78,57%              | 73,33%                             |
| Overweight       | 40,00%             | 13,64%              | 14,29%              | 18,33%                             |
| Obese            | 10,00%             | 9,09%               | 7,14%               | 8,33%                              |

† The fractions of births by each BMI category correspond to the prevalences by BMI category of children aged 0 to 12 months

**Table 122. Fraction of births for women by body mass index category and socioeconomic status (Bogotá) †**

| Population group | Lower SES (%/year) | Middle SES (%/year) | Higher SES (%/year) | Complete Urban Population (%/year) |
|------------------|--------------------|---------------------|---------------------|------------------------------------|
| Not- overweight  | 63,64%             | 81,25%              | 83,72%              | 80,00%                             |
| Overweight       | 18,18%             | 18,75%              | 11,63%              | 14,29%                             |
| Obese            | 18,18%             | 0,00%               | 4,65%               | 5,71%                              |

† The fractions of births by each BMI category correspond to the prevalences by BMI category of children aged 0 to 12 months

**Table 123. Mortality rates for men and population size by age group without segregate by socioeconomic status (Bogotá) †**

| Age group | Mortality rates (R) (%/year) | Not- overweight men in 2005 (Number of people)1 | Overweight men in 2005 (Number of people)2 | Obese men in 2005 (Number of people)3 |
|-----------|------------------------------|-------------------------------------------------|--------------------------------------------|---------------------------------------|
| 0-4       | 0.00307                      | 221907                                          | 64814                                      | 16478                                 |
| 5-9       | 0.00033                      | 262469                                          | 41995                                      | 12599                                 |
| 10-14     | 0.00038                      | 263573                                          | 44391                                      | 16647                                 |
| 15-19     | 0.00275                      | 273307                                          | 31363                                      | 2240                                  |
| 20-24     | 0.00451                      | 251792                                          | 44357                                      | 11742                                 |
| 25-29     | 0.00478                      | 196181                                          | 87192                                      | 8719                                  |
| 30-34     | 0.00447                      | 150111                                          | 93004                                      | 13053                                 |
| 35-39     | 0.00378                      | 123651                                          | 94978                                      | 26881                                 |
| 40-44     | 0.00398                      | 100731                                          | 102498                                     | 28275                                 |



|       |         |       |        |       |
|-------|---------|-------|--------|-------|
| 45-49 | 0.00447 | 67880 | 101066 | 22627 |
| 50-54 | 0.00621 | 52065 | 68428  | 28264 |
| 55-59 | 0.00823 | 47031 | 52910  | 14697 |

†Values used in this table are for the urban population

<sup>1</sup> Initial value used in the stock of not-overweight population in 2005.

<sup>2</sup> Initial value used in the stock of overweight population in 2005.

<sup>3</sup> Initial value used in the stock of obese population in 2005.

**Table 124. Mortality rates for women and population size by age group without segregate by socioeconomic status (Bogotá) †**

| Age group | Mortality rates (R) (%/year) | Not- overweight women in 2005 (Number of people) <sup>1</sup> | Overweight women in 2005 (Number of people) <sup>2</sup> | Obese women in 2005 (Number of people) <sup>3</sup> |
|-----------|------------------------------|---------------------------------------------------------------|----------------------------------------------------------|-----------------------------------------------------|
| 0-4       | 0.00252                      | 215154                                                        | 59672                                                    | 15128                                               |
| 5-9       | 0.00019                      | 227389                                                        | 63274                                                    | 13841                                               |
| 10-14     | 0.00028                      | 256595                                                        | 50895                                                    | 4241                                                |
| 15-19     | 0.00059                      | 231695                                                        | 60506                                                    | 7379                                                |
| 20-24     | 0.00085                      | 239490                                                        | 82111                                                    | 13685                                               |
| 25-29     | 0.00095                      | 205086                                                        | 90359                                                    | 22336                                               |
| 30-34     | 0.00101                      | 151898                                                        | 90925                                                    | 37440                                               |
| 35-39     | 0.00132                      | 120719                                                        | 101489                                                   | 53415                                               |
| 40-44     | 0.00157                      | 103922                                                        | 112493                                                   | 50354                                               |
| 45-49     | 0.00235                      | 54921                                                         | 111704                                                   | 60506                                               |
| 50-54     | 0.00354                      | 40398                                                         | 77037                                                    | 61066                                               |
| 55-59     | 0.00526                      | 34180                                                         | 51821                                                    | 51821                                               |

†Values used in this table are for the urban population

<sup>1</sup> Initial value used in the stock of not-overweight population in 2005.

<sup>2</sup> Initial value used in the stock of overweight population in 2005.

<sup>3</sup> Initial value used in the stock of obese population in 2005.

**Table 125. Man mortality rates and population size by age group for the lower socioeconomic status population (Bogotá) †**

| Age group | Mortality rates (R) (%/year) | Not- overweight men in 2005 (Number of people) <sup>1</sup> | Overweight men in 2005 (Number of people) <sup>2</sup> | Obese men in 2005 (Number of people) <sup>3</sup> |
|-----------|------------------------------|-------------------------------------------------------------|--------------------------------------------------------|---------------------------------------------------|
| 0-4       | 0.00307                      | 40646                                                       | 14281                                                  | 4394                                              |
| 5-9       | 0.00033                      | 31496                                                       | 0                                                      | 0                                                 |
| 10-14     | 0.00038                      | 36068                                                       | 0                                                      | 0                                                 |
| 15-19     | 0.00275                      | 33603                                                       | 0                                                      | 0                                                 |
| 20-24     | 0.00451                      | 31311                                                       | 6523                                                   | 0                                                 |
| 25-29     | 0.00478                      | 27611                                                       | 8719                                                   | 1453                                              |
| 30-34     | 0.00447                      | 9790                                                        | 11422                                                  | 0                                                 |
| 35-39     | 0.00378                      | 14336                                                       | 8960                                                   | 1792                                              |
| 40-44     | 0.00398                      | 15905                                                       | 5302                                                   | 3534                                              |
| 45-49     | 0.00447                      | 7542                                                        | 6034                                                   | 0                                                 |
| 50-54     | 0.00621                      | 10413                                                       | 5950                                                   | 1488                                              |
| 55-59     | 0.00823                      | 1470                                                        | 0                                                      | 1470                                              |

†Values used in this table are for the urban population

<sup>1</sup> Initial value used in the stock of not-overweight population in 2005 for lower SES.

<sup>2</sup> Initial value used in the stock of overweight population in 2005 for lower SES.

<sup>3</sup> Initial value used in the stock of obese population in 2005 for lower SES.

**Table 126. Women mortality rates and population size by age group for the lower socioeconomic status population (Bogotá) †**

| Age group | Mortality rates (R) (%/year) | Not- overweight women in 2005 (Number of people) <sup>1</sup> | Overweight women in 2005 (Number of people) <sup>2</sup> | Obese women in 2005 (Number of people) <sup>3</sup> |
|-----------|------------------------------|---------------------------------------------------------------|----------------------------------------------------------|-----------------------------------------------------|
| 0-4       | 0.00252                      | 41258                                                         | 12893                                                    | 2579                                                |
| 5-9       | 0.00019                      | 19573                                                         | 8897                                                     | 1779                                                |
| 10-14     | 0.00028                      | 34637                                                         | 0                                                        | 0                                                   |
| 15-19     | 0.00059                      | 25231                                                         | 7569                                                     | 0                                                   |
| 20-24     | 0.00085                      | 32485                                                         | 8715                                                     | 0                                                   |
| 25-29     | 0.00095                      | 24097                                                         | 12757                                                    | 4252                                                |
| 30-34     | 0.00101                      | 12570                                                         | 7735                                                     | 2901                                                |
| 35-39     | 0.00132                      | 11598                                                         | 10769                                                    | 5799                                                |
| 40-44     | 0.00157                      | 7127                                                          | 16631                                                    | 4752                                                |
| 45-49     | 0.00235                      | 8472                                                          | 5930                                                     | 1694                                                |
| 50-54     | 0.00354                      | 6120                                                          | 6120                                                     | 9180                                                |
| 55-59     | 0.00526                      | 1767                                                          | 1767                                                     | 0                                                   |

†Values used in this table are for the urban population

<sup>1</sup> Initial value used in the stock of not-overweight population in 2005 for lower SES.

<sup>2</sup> Initial value used in the stock of overweight population in 2005 for lower SES.

<sup>3</sup> Initial value used in the stock of obese population in 2005 for lower SES.

**Table 127. Man mortality rates and population size by age group for the middle socioeconomic status population (Bogotá) †**

| Age group | Mortality rates (R) (%/year) | Not- overweight men in 2005 (Number of people) <sup>1</sup> | Overweight men in 2005 (Number of people) <sup>2</sup> | Obese men in 2005 (Number of people) <sup>3</sup> |
|-----------|------------------------------|-------------------------------------------------------------|--------------------------------------------------------|---------------------------------------------------|
| 0-4       | 0.00307                      | 64814                                                       | 16478                                                  | 3296                                              |
| 5-9       | 0.00033                      | 73491                                                       | 12599                                                  | 2100                                              |
| 10-14     | 0.00038                      | 77685                                                       | 11098                                                  | 0                                                 |
| 15-19     | 0.00275                      | 62726                                                       | 4480                                                   | 0                                                 |
| 20-24     | 0.00451                      | 58708                                                       | 7828                                                   | 3914                                              |
| 25-29     | 0.00478                      | 43596                                                       | 20345                                                  | 0                                                 |
| 30-34     | 0.00447                      | 37528                                                       | 16316                                                  | 0                                                 |
| 35-39     | 0.00378                      | 25089                                                       | 14336                                                  | 8960                                              |
| 40-44     | 0.00398                      | 31810                                                       | 14138                                                  | 1767                                              |
| 45-49     | 0.00447                      | 12068                                                       | 18101                                                  | 9051                                              |
| 50-54     | 0.00621                      | 7438                                                        | 10413                                                  | 2975                                              |
| 55-59     | 0.00823                      | 7349                                                        | 8818                                                   | 2939                                              |

†Values used in this table are for the urban population

<sup>1</sup> Initial value used in the stock of not-overweight population in 2005 for middle SES.

<sup>2</sup> Initial value used in the stock of overweight population in 2005 for middle SES.

<sup>3</sup> Initial value used in the stock of obese population in 2005 for middle SES.

**Table 128. Women mortality rates and population size by age group for the middle socioeconomic status population (Bogotá) †**

| Age group | Mortality rates (R) (%/year) | Not- overweight women in 2005 (Number of people) <sup>1</sup> | Overweight women in 2005 (Number of people) <sup>2</sup> | Obese women in 2005 (Number of people) <sup>3</sup> |
|-----------|------------------------------|---------------------------------------------------------------|----------------------------------------------------------|-----------------------------------------------------|
| 0-4       | 0.00252                      | 58629                                                         | 18553                                                    | 3711                                                |
| 5-9       | 0.00019                      | 62277                                                         | 19929                                                    | 2491                                                |
| 10-14     | 0.00028                      | 63945                                                         | 19183                                                    | 2131                                                |
| 15-19     | 0.00059                      | 42368                                                         | 19134                                                    | 4100                                                |
| 20-24     | 0.00085                      | 51457                                                         | 20583                                                    | 4678                                                |
| 25-29     | 0.00095                      | 41738                                                         | 23432                                                    | 4394                                                |
| 30-34     | 0.00101                      | 34714                                                         | 18935                                                    | 5260                                                |
| 35-39     | 0.00132                      | 23153                                                         | 22262                                                    | 8905                                                |

|       |         |       |       |       |
|-------|---------|-------|-------|-------|
| 40-44 | 0.00157 | 24437 | 29324 | 1222  |
| 45-49 | 0.00235 | 10333 | 21700 | 14466 |
| 50-54 | 0.00354 | 3845  | 8330  | 12815 |
| 55-59 | 0.00526 | 8353  | 8353  | 6265  |

†Values used in this table are for the urban population

1 Initial value used in the stock of not-overweight population in 2005 for middle SES.

2 Initial value used in the stock of overweight population in 2005 for middle SES.

3 Initial value used in the stock of obese population in 2005 for middle SES.

**Table 129. Man mortality rates and population size by age group for the higher socioeconomic status population (Bogotá) †**

| Age group | Mortality rates (R) (%/year) | Not- overweight men in 2005 (Number of people) <sup>1</sup> | Overweight men in 2005 (Number of people) <sup>2</sup> | Obese men in 2005 (Number of people) <sup>3</sup> |
|-----------|------------------------------|-------------------------------------------------------------|--------------------------------------------------------|---------------------------------------------------|
| 0-4       | 0.00307                      | 116446                                                      | 34055                                                  | 8788                                              |
| 5-9       | 0.00033                      | 157482                                                      | 29397                                                  | 10499                                             |
| 10-14     | 0.00038                      | 149820                                                      | 33293                                                  | 16647                                             |
| 15-19     | 0.00275                      | 176977                                                      | 26883                                                  | 2240                                              |
| 20-24     | 0.00451                      | 161773                                                      | 30006                                                  | 7828                                              |
| 25-29     | 0.00478                      | 124975                                                      | 58128                                                  | 7266                                              |
| 30-34     | 0.00447                      | 102794                                                      | 65266                                                  | 13053                                             |
| 35-39     | 0.00378                      | 84226                                                       | 71682                                                  | 16128                                             |
| 40-44     | 0.00398                      | 53016                                                       | 83059                                                  | 22974                                             |
| 45-49     | 0.00447                      | 48270                                                       | 76931                                                  | 13576                                             |
| 50-54     | 0.00621                      | 34214                                                       | 52065                                                  | 23801                                             |
| 55-59     | 0.00823                      | 38213                                                       | 44092                                                  | 10288                                             |

†Values used in this table are for the urban population

<sup>1</sup> Initial value used in the stock of not-overweight population in 2005 for higher SES.

<sup>2</sup> Initial value used in the stock of overweight population in 2005 for higher SES.

<sup>3</sup> Initial value used in the stock of obese population in 2005 for higher SES.

**Table 130. Women mortality rates and population size by age group for the higher socioeconomic status population (Bogotá) †**

| Age group | Mortality rates (R) (%/year) | Not- overweight women in 2005 (Number of people) <sup>1</sup> | Overweight women in 2005 (Number of people) <sup>2</sup> | Obese women in 2005 (Number of people) <sup>3</sup> |
|-----------|------------------------------|---------------------------------------------------------------|----------------------------------------------------------|-----------------------------------------------------|
| 0-4       | 0.00252                      | 115592                                                        | 27778                                                    | 8961                                                |
| 5-9       | 0.00019                      | 145390                                                        | 34967                                                    | 9202                                                |
| 10-14     | 0.00028                      | 160192                                                        | 29665                                                    | 1978                                                |
| 15-19     | 0.00059                      | 164342                                                        | 34002                                                    | 2833                                                |
| 20-24     | 0.00085                      | 154965                                                        | 53042                                                    | 9360                                                |
| 25-29     | 0.00095                      | 140266                                                        | 52600                                                    | 14246                                               |
| 30-34     | 0.00101                      | 104517                                                        | 64235                                                    | 29396                                               |
| 35-39     | 0.00132                      | 86497                                                         | 67539                                                    | 39101                                               |
| 40-44     | 0.00157                      | 70638                                                         | 70638                                                    | 42001                                               |
| 45-49     | 0.00235                      | 35649                                                         | 84096                                                    | 44790                                               |
| 50-54     | 0.00354                      | 32105                                                         | 61459                                                    | 38526                                               |
| 55-59     | 0.00526                      | 24247                                                         | 41882                                                    | 45188                                               |

†Values used in this table are for the urban population

<sup>1</sup> Initial value used in the stock of not-overweight population in 2005 for higher SES.

<sup>2</sup> Initial value used in the stock of overweight population in 2005 for higher SES.

<sup>3</sup> Initial value used in the stock of obese population in 2005 for higher SES.

**Table 131. Data and projections of the Fertility rates (Bogotá) †**

| Year | Average Region Fecundity Rate | Year | Average Region Fecundity Rate | Year | Average Region Fecundity Rate |
|------|-------------------------------|------|-------------------------------|------|-------------------------------|
| 2005 | 1,985                         | 2014 | 1,908                         | 2023 | 1,896                         |
| 2006 | 1,968                         | 2015 | 1,907                         | 2024 | 1,894                         |
| 2007 | 1,951                         | 2016 | 1,905                         | 2025 | 1,893                         |
| 2008 | 1,934                         | 2017 | 1,904                         | 2026 | 1,891                         |
| 2009 | 1,929                         | 2018 | 1,903                         | 2027 | 1,890                         |
| 2010 | 1,924                         | 2019 | 1,901                         | 2028 | 1,889                         |
| 2011 | 1,919                         | 2020 | 1,900                         | 2029 | 1,887                         |
| 2012 | 1,914                         | 2021 | 1,898                         | 2030 | 1,886                         |
| 2013 | 1,910                         | 2022 | 1,897                         |      |                               |

† Data of Fertility rate of DANE [1] was used to forecast the fertility rate from 2005 to 2030. Holt-Winters no seasonal method in EViews 5 (Quantitative Micro Software, LLC) was used to forecast the fertility rate. In the SD model we used data from 2005 to 2030.

## 1.6 Orinoquia y Amazonia region

The Orinoquia y Amazonia region of Colombia is located in the south of the national territory and consists of eight departments, these are:

- Arauca (81)
- Casanare (85)
- Putumayo (86)
- Amazonas (91)
- Guainía (94)
- Guaviare (95)
- Vaupés (97)
- Vichada (99)

### 1.6.1 Data and model parameters used

**Table 132. Prevalent rates of entire population by age group, sex, and body mass index category in 2005 (Orinoquia y Amazonia region)**

| Age Group | Nutritional State Male |           |         | Nutritional State Female |           |         |
|-----------|------------------------|-----------|---------|--------------------------|-----------|---------|
|           | Not-Overweigh          | Overweigh | Obese   | Not-Overweigh            | Overweigh | Obese   |
| 0-4       | 0.78618                | 0.17171   | 0.04212 | 0.79330                  | 0.17207   | 0.03464 |
| 5-9       | 0.79037                | 0.15615   | 0.05348 | 0.83559                  | 0.13007   | 0.03434 |
| 10-14     | 0.81679                | 0.13959   | 0.04362 | 0.78942                  | 0.16667   | 0.04391 |
| 15-19     | 0.86639                | 0.10127   | 0.03235 | 0.75000                  | 0.20668   | 0.04332 |
| 20-24     | 0.71508                | 0.22533   | 0.05959 | 0.68852                  | 0.21816   | 0.09332 |
| 25-29     | 0.57197                | 0.33523   | 0.09280 | 0.59781                  | 0.27770   | 0.12449 |
| 30-34     | 0.42664                | 0.43341   | 0.13995 | 0.47958                  | 0.33434   | 0.18608 |
| 35-39     | 0.37275                | 0.44473   | 0.18252 | 0.34647                  | 0.40230   | 0.25123 |
| 40-44     | 0.35529                | 0.44706   | 0.19765 | 0.32513                  | 0.42004   | 0.25483 |
| 45-49     | 0.34270                | 0.43539   | 0.22191 | 0.26588                  | 0.42118   | 0.31294 |
| 50-54     | 0.33108                | 0.47635   | 0.19257 | 0.22188                  | 0.44681   | 0.33131 |
| 55-59     | 0.33333                | 0.41243   | 0.25424 | 0.24409                  | 0.37795   | 0.37795 |

**Table 133. Prevalent rates of lower socioeconomic status population by age group, sex, and body mass index category in 2005 (Orinoquia y Amazonia region)**

| Age Group | Nutritional State Male |           |         | Nutritional State Female |           |         |
|-----------|------------------------|-----------|---------|--------------------------|-----------|---------|
|           | Not-Overweigh          | Overweigh | Obese   | Not-Overweigh            | Overweigh | Obese   |
| 0-4       | 0.81146                | 0.14972   | 0.03882 | 0.78246                  | 0.18421   | 0.03333 |
| 5-9       | 0.82648                | 0.14132   | 0.03220 | 0.87674                  | 0.10764   | 0.01563 |
| 10-14     | 0.85199                | 0.12334   | 0.02467 | 0.82011                  | 0.15344   | 0.02646 |
| 15-19     | 0.90226                | 0.07519   | 0.02256 | 0.73933                  | 0.22472   | 0.03596 |
| 20-24     | 0.76656                | 0.18612   | 0.04732 | 0.68396                  | 0.23113   | 0.08491 |
| 25-29     | 0.64639                | 0.30038   | 0.05323 | 0.54913                  | 0.30925   | 0.14162 |
| 30-34     | 0.49558                | 0.41150   | 0.09292 | 0.48882                  | 0.31949   | 0.19169 |
| 35-39     | 0.50279                | 0.37430   | 0.12291 | 0.36364                  | 0.38462   | 0.25175 |
| 40-44     | 0.49198                | 0.42246   | 0.08556 | 0.32549                  | 0.45490   | 0.21961 |
| 45-49     | 0.39752                | 0.39130   | 0.21118 | 0.28492                  | 0.45251   | 0.26257 |
| 50-54     | 0.39189                | 0.45946   | 0.14865 | 0.27660                  | 0.41844   | 0.30496 |
| 55-59     | 0.45349                | 0.40698   | 0.13953 | 0.25926                  | 0.41667   | 0.32407 |

**Table 134. Prevalent rates of middle socioeconomic status population by age group, sex, and body mass index category in 2005 (Orinoquia y Amazonia region)**

| Age Group | Nutritional State Male |           |         | Nutritional State Female |           |         |
|-----------|------------------------|-----------|---------|--------------------------|-----------|---------|
|           | Not-Overweigh          | Overweigh | Obese   | Not-Overweigh            | Overweigh | Obese   |
| 0-4       | 0.74672                | 0.20524   | 0.04803 | 0.83920                  | 0.13568   | 0.02513 |
| 5-9       | 0.78667                | 0.15111   | 0.06222 | 0.79079                  | 0.14644   | 0.06276 |
| 10-14     | 0.76652                | 0.17181   | 0.06167 | 0.77459                  | 0.15574   | 0.06967 |
| 15-19     | 0.84242                | 0.12727   | 0.03030 | 0.74747                  | 0.20707   | 0.04545 |
| 20-24     | 0.63115                | 0.30328   | 0.06557 | 0.69082                  | 0.19807   | 0.11111 |
| 25-29     | 0.46429                | 0.38571   | 0.15000 | 0.61137                  | 0.28436   | 0.10427 |
| 30-34     | 0.40541                | 0.40541   | 0.18919 | 0.38503                  | 0.40107   | 0.21390 |
| 35-39     | 0.28814                | 0.52542   | 0.18644 | 0.35616                  | 0.36301   | 0.28082 |
| 40-44     | 0.34783                | 0.41739   | 0.23478 | 0.31288                  | 0.36196   | 0.32515 |
| 45-49     | 0.35106                | 0.44681   | 0.20213 | 0.23967                  | 0.40496   | 0.35537 |
| 50-54     | 0.32895                | 0.50000   | 0.17105 | 0.17391                  | 0.45652   | 0.36957 |
| 55-59     | 0.24324                | 0.45946   | 0.29730 | 0.26087                  | 0.33333   | 0.40580 |

**Table 135. Prevalent rates of higher socioeconomic status population by age group, sex, and body mass index category in 2005 (Orinoquia y Amazonia region)**

| Age Group | Nutritional State Male |           |         | Nutritional State Female |           |         |
|-----------|------------------------|-----------|---------|--------------------------|-----------|---------|
|           | Not-Overweigh          | Overweigh | Obese   | Not-Overweigh            | Overweigh | Obese   |
| 0-4       | 0.75641                | 0.19872   | 0.04487 | 0.76984                  | 0.17460   | 0.05556 |
| 5-9       | 0.66225                | 0.21854   | 0.11921 | 0.74658                  | 0.19178   | 0.06164 |
| 10-14     | 0.77301                | 0.14724   | 0.07975 | 0.71728                  | 0.21990   | 0.06283 |
| 15-19     | 0.79592                | 0.14286   | 0.06122 | 0.78182                  | 0.15758   | 0.06061 |
| 20-24     | 0.65306                | 0.25510   | 0.09184 | 0.69753                  | 0.20988   | 0.09259 |
| 25-29     | 0.53600                | 0.35200   | 0.11200 | 0.67816                  | 0.20690   | 0.11494 |
| 30-34     | 0.30189                | 0.50943   | 0.18868 | 0.57143                  | 0.28571   | 0.14286 |

|       |         |         |         |         |         |         |
|-------|---------|---------|---------|---------|---------|---------|
| 35-39 | 0.22826 | 0.47826 | 0.29348 | 0.31073 | 0.46328 | 0.22599 |
| 40-44 | 0.15447 | 0.51220 | 0.33333 | 0.33775 | 0.42384 | 0.23841 |
| 45-49 | 0.24752 | 0.49505 | 0.25743 | 0.26400 | 0.39200 | 0.34400 |
| 50-54 | 0.20833 | 0.48611 | 0.30556 | 0.18750 | 0.47917 | 0.33333 |
| 55-59 | 0.20370 | 0.38889 | 0.40741 | 0.20779 | 0.36364 | 0.42857 |

**Table 136. Prevalent rates of entire population by age group, sex, and body mass index category in 2010 (Orinoquia y Amazonia region)**

| Age Group | Nutritional State Male |           |         | Nutritional State Female |           |         |
|-----------|------------------------|-----------|---------|--------------------------|-----------|---------|
|           | Not-Overweigh          | Overweigh | Obese   | Not-Overweigh            | Overweigh | Obese   |
| 0-4       | 0.69989                | 0.23068   | 0.06943 | 0.76251                  | 0.19702   | 0.04047 |
| 5-9       | 0.73990                | 0.18325   | 0.07685 | 0.81022                  | 0.14703   | 0.04275 |
| 10-14     | 0.79958                | 0.14376   | 0.05666 | 0.76560                  | 0.18904   | 0.04537 |
| 15-19     | 0.85432                | 0.11358   | 0.03210 | 0.74685                  | 0.20273   | 0.05042 |
| 20-24     | 0.66436                | 0.26471   | 0.07093 | 0.64390                  | 0.26308   | 0.09302 |
| 25-29     | 0.42458                | 0.43575   | 0.13966 | 0.51935                  | 0.33780   | 0.14286 |
| 30-34     | 0.36640                | 0.43117   | 0.20243 | 0.41021                  | 0.39868   | 0.19110 |
| 35-39     | 0.34112                | 0.48131   | 0.17757 | 0.31979                  | 0.45760   | 0.22261 |
| 40-44     | 0.27569                | 0.47870   | 0.24561 | 0.28544                  | 0.40613   | 0.30843 |
| 45-49     | 0.29589                | 0.44110   | 0.26301 | 0.25285                  | 0.42825   | 0.31891 |
| 50-54     | 0.26374                | 0.47985   | 0.25641 | 0.22161                  | 0.43767   | 0.34072 |
| 55-59     | 0.29534                | 0.45078   | 0.25389 | 0.26033                  | 0.40083   | 0.33884 |

**Table 137.**

**Prevalent rates of lower socioeconomic status population by age group, sex, and body mass index category in 2010 (Orinoquia y Amazonia region)**

| Age Group | Nutritional State Male |           |         | Nutritional State Female |           |         |
|-----------|------------------------|-----------|---------|--------------------------|-----------|---------|
|           | Not-Overweigh          | Overweigh | Obese   | Not-Overweigh            | Overweigh | Obese   |
| 0-4       | 0.69618                | 0.24275   | 0.06107 | 0.74408                  | 0.21450   | 0.04142 |
| 5-9       | 0.74402                | 0.19269   | 0.06329 | 0.82132                  | 0.13213   | 0.04655 |
| 10-14     | 0.81399                | 0.13244   | 0.05357 | 0.78691                  | 0.17409   | 0.03900 |
| 15-19     | 0.86404                | 0.10555   | 0.03041 | 0.74620                  | 0.21277   | 0.04103 |
| 20-24     | 0.69388                | 0.24745   | 0.05867 | 0.61895                  | 0.28842   | 0.09263 |
| 25-29     | 0.43526                | 0.43251   | 0.13223 | 0.47381                  | 0.36667   | 0.15952 |
| 30-34     | 0.42105                | 0.41118   | 0.16776 | 0.40970                  | 0.39892   | 0.19137 |
| 35-39     | 0.41176                | 0.42647   | 0.16176 | 0.29641                  | 0.48204   | 0.22156 |
| 40-44     | 0.32189                | 0.45494   | 0.22318 | 0.26667                  | 0.41818   | 0.31515 |
| 45-49     | 0.38462                | 0.38914   | 0.22624 | 0.28745                  | 0.40081   | 0.31174 |
| 50-54     | 0.28902                | 0.47399   | 0.23699 | 0.20737                  | 0.46544   | 0.32719 |
| 55-59     | 0.31148                | 0.45082   | 0.23770 | 0.30282                  | 0.40141   | 0.29577 |

**Table 138. Prevalent rates of middle socioeconomic status population by age group, sex, and body mass index category in 2010 (Orinoquia y Amazonia region)**

| Age Group | Nutritional State Male |           |         | Nutritional State Female |           |         |
|-----------|------------------------|-----------|---------|--------------------------|-----------|---------|
|           | Not-Overweigh          | Overweigh | Obese   | Not-Overweigh            | Overweigh | Obese   |
| 0-4       | 0.69588                | 0.20619   | 0.09794 | 0.80193                  | 0.16425   | 0.03382 |
| 5-9       | 0.72174                | 0.18261   | 0.09565 | 0.77727                  | 0.19091   | 0.03182 |
| 10-14     | 0.78404                | 0.15493   | 0.06103 | 0.73600                  | 0.20400   | 0.06000 |
| 15-19     | 0.85326                | 0.10870   | 0.03804 | 0.77578                  | 0.16143   | 0.06278 |
| 20-24     | 0.60274                | 0.29452   | 0.10274 | 0.70414                  | 0.20118   | 0.09467 |
| 25-29     | 0.41304                | 0.41304   | 0.17391 | 0.60825                  | 0.29381   | 0.09794 |
| 30-34     | 0.30282                | 0.43662   | 0.26056 | 0.40341                  | 0.38636   | 0.21023 |
| 35-39     | 0.25664                | 0.54867   | 0.19469 | 0.40120                  | 0.38922   | 0.20958 |
| 40-44     | 0.24561                | 0.45614   | 0.29825 | 0.29323                  | 0.39850   | 0.30827 |
| 45-49     | 0.18557                | 0.45361   | 0.36082 | 0.20149                  | 0.44776   | 0.35075 |
| 50-54     | 0.22581                | 0.50000   | 0.27419 | 0.22105                  | 0.35789   | 0.42105 |
| 55-59     | 0.30000                | 0.42000   | 0.28000 | 0.21739                  | 0.40580   | 0.37681 |

**Table 139. Prevalent rates of higher socioeconomic status population by age group, sex, and body mass index category in 2010 (Orinoquia y Amazonia region)**

| Age Group | Nutritional State Male |           |         | Nutritional State Female |           |         |
|-----------|------------------------|-----------|---------|--------------------------|-----------|---------|
|           | Not-Overweigh          | Overweigh | Obese   | Not-Overweigh            | Overweigh | Obese   |
| 0-4       | 0.77273                | 0.15909   | 0.06818 | 0.83929                  | 0.10714   | 0.05357 |
| 5-9       | 0.75676                | 0.09459   | 0.14865 | 0.80822                  | 0.15068   | 0.04110 |
| 10-14     | 0.70588                | 0.22059   | 0.07353 | 0.67778                  | 0.26667   | 0.05556 |
| 15-19     | 0.77612                | 0.19403   | 0.02985 | 0.66197                  | 0.23944   | 0.09859 |
| 20-24     | 0.60000                | 0.32500   | 0.07500 | 0.68182                  | 0.22727   | 0.09091 |
| 25-29     | 0.36111                | 0.55556   | 0.08333 | 0.55172                  | 0.27586   | 0.17241 |
| 30-34     | 0.20833                | 0.54167   | 0.25000 | 0.43333                  | 0.43333   | 0.13333 |
| 35-39     | 0.11628                | 0.65116   | 0.23256 | 0.23077                  | 0.50769   | 0.26154 |
| 40-44     | 0.13462                | 0.63462   | 0.23077 | 0.37288                  | 0.35593   | 0.27119 |
| 45-49     | 0.10638                | 0.65957   | 0.23404 | 0.22414                  | 0.50000   | 0.27586 |
| 50-54     | 0.21053                | 0.47368   | 0.31579 | 0.28571                  | 0.46939   | 0.24490 |
| 55-59     | 0.19048                | 0.52381   | 0.28571 | 0.16129                  | 0.38710   | 0.45161 |

**Table 140. Fraction of births for men by body mass index category, and socioeconomic status (Orinoquia y Amazonia region) †**

| Population group | Lower SES (%/year) | Middle SES (%/year) | Higher SES (%/year) | Complete Urban Population (%/year) |
|------------------|--------------------|---------------------|---------------------|------------------------------------|
| Not- overweight  | 82,17%             | 82,50%              | 74,36%              | 80,77%                             |
| Overweight       | 13,95%             | 15,00%              | 20,51%              | 15,38%                             |
| Obese            | 3,88%              | 2,50%               | 5,13%               | 3,85%                              |

† The fractions of births by each BMI category correspond to the prevalences by BMI category of children aged 0 to 12 months

**Table 141. Fraction of births for women by body mass index category and socioeconomic status (Orinoquia y Amazonia region) †**

| Population group | Lower SES (%/year) | Middle SES (%/year) | Higher SES (%/year) | Complete Urban Population (%/year) |
|------------------|--------------------|---------------------|---------------------|------------------------------------|
| Not- overweight  | 82,35%             | 86,44%              | 67,74%              | 81,34%                             |
| Overweight       | 14,29%             | 13,56%              | 25,81%              | 15,79%                             |
| Obese            | 3,36%              | 0,00%               | 6,45%               | 2,87%                              |

† The fractions of births by each BMI category correspond to the prevalences by BMI category of children aged 0 to 12 months

**Table 142. Mortality rates for men and population size by age group without segregate by socioeconomic status (Orinoquia y Amazonia region) †**

| Age group | Mortality rates (R) (%/year) | Not- overweight men in 2005 (Number of people) <sup>1</sup> | Overweight men in 2005 (Number of people) <sup>2</sup> | Obese men in 2005 (Number of people) <sup>3</sup> |
|-----------|------------------------------|-------------------------------------------------------------|--------------------------------------------------------|---------------------------------------------------|
| 0-4       | 0.00350                      | 29652                                                       | 6476                                                   | 1589                                              |
| 5-9       | 0.00043                      | 29523                                                       | 5833                                                   | 1997                                              |
| 10-14     | 0.00022                      | 30309                                                       | 5180                                                   | 1619                                              |
| 15-19     | 0.00174                      | 27827                                                       | 3252                                                   | 1039                                              |
| 20-24     | 0.00513                      | 18532                                                       | 5840                                                   | 1544                                              |
| 25-29     | 0.00426                      | 12877                                                       | 7547                                                   | 2089                                              |
| 30-34     | 0.00426                      | 8514                                                        | 8649                                                   | 2793                                              |
| 35-39     | 0.00307                      | 6927                                                        | 8264                                                   | 3392                                              |
| 40-44     | 0.00421                      | 5822                                                        | 7326                                                   | 3239                                              |
| 45-49     | 0.00342                      | 4415                                                        | 5609                                                   | 2859                                              |
| 50-54     | 0.00538                      | 3202                                                        | 4606                                                   | 1862                                              |
| 55-59     | 0.00882                      | 2380                                                        | 2945                                                   | 1815                                              |

† Values used in this table are for the urban population

<sup>1</sup> Initial value used in the stock of not-overweight population in 2005.

<sup>2</sup> Initial value used in the stock of overweight population in 2005.

<sup>3</sup> Initial value used in the stock of obese population in 2005.

**Table 143. Mortality rates for women and population size by age group without segregate by socioeconomic status (Orinoquia y Amazonia region) †**

| Age group | Mortality rates (R) (%/year) | Not- overweight women in 2005 (Number of people) <sup>1</sup> | Overweight women in 2005 (Number of people) <sup>2</sup> | Obese women in 2005 (Number of people) <sup>3</sup> |
|-----------|------------------------------|---------------------------------------------------------------|----------------------------------------------------------|-----------------------------------------------------|
| 0-4       | 0.00359                      | 29193                                                         | 6332                                                     | 1275                                                |
| 5-9       | 0.00032                      | 31109                                                         | 4843                                                     | 1278                                                |
| 10-14     | 0.00043                      | 29513                                                         | 6231                                                     | 1642                                                |
| 15-19     | 0.00089                      | 25369                                                         | 6991                                                     | 1465                                                |
| 20-24     | 0.00129                      | 18722                                                         | 5932                                                     | 2537                                                |
| 25-29     | 0.00132                      | 14483                                                         | 6728                                                     | 3016                                                |
| 30-34     | 0.00175                      | 10686                                                         | 7450                                                     | 4146                                                |
| 35-39     | 0.00126                      | 7122                                                          | 8270                                                     | 5164                                                |
| 40-44     | 0.00136                      | 5725                                                          | 7396                                                     | 4487                                                |
| 45-49     | 0.00243                      | 3613                                                          | 5724                                                     | 4253                                                |
| 50-54     | 0.00472                      | 2210                                                          | 4450                                                     | 3299                                                |
| 55-59     | 0.00699                      | 1815                                                          | 2811                                                     | 2811                                                |

† Values used in this table are for the urban population

<sup>1</sup> Initial value used in the stock of not-overweight population in 2005.

<sup>2</sup> Initial value used in the stock of overweight population in 2005.

<sup>3</sup> Initial value used in the stock of obese population in 2005.



**Table 144. Man mortality rates and population size by age group for the lower socioeconomic status population (Orinoquia y Amazonia region) †**

| Age group | Mortality rates (R) (%/year) | Not- overweight men in 2005 (Number of people) <sup>1</sup> | Overweight men in 2005 (Number of people) <sup>2</sup> | Obese men in 2005 (Number of people) <sup>3</sup> |
|-----------|------------------------------|-------------------------------------------------------------|--------------------------------------------------------|---------------------------------------------------|
| 0-4       | 0.00350                      | 17881                                                       | 3299                                                   | 855                                               |
| 5-9       | 0.00043                      | 18457                                                       | 3156                                                   | 719                                               |
| 10-14     | 0.00022                      | 18169                                                       | 2630                                                   | 526                                               |
| 15-19     | 0.00174                      | 16262                                                       | 1355                                                   | 407                                               |
| 20-24     | 0.00513                      | 11727                                                       | 2847                                                   | 724                                               |
| 25-29     | 0.00426                      | 7249                                                        | 3368                                                   | 597                                               |
| 30-34     | 0.00426                      | 5045                                                        | 4189                                                   | 946                                               |
| 35-39     | 0.00307                      | 4299                                                        | 3201                                                   | 1051                                              |
| 40-44     | 0.00421                      | 3547                                                        | 3046                                                   | 617                                               |
| 45-49     | 0.00342                      | 2316                                                        | 2280                                                   | 1230                                              |
| 50-54     | 0.00538                      | 1895                                                        | 2221                                                   | 719                                               |
| 55-59     | 0.00882                      | 1573                                                        | 1412                                                   | 484                                               |

†Values used in this table are for the urban population

<sup>1</sup> Initial value used in the stock of not-overweight population in 2005 for lower SES.

<sup>2</sup> Initial value used in the stock of overweight population in 2005 for lower SES.

<sup>3</sup> Initial value used in the stock of obese population in 2005 for lower SES.

**Table 145. Women mortality rates and population size by age group for the lower socioeconomic status population (Orinoquia y Amazonia region) †**

| Age group | Mortality rates (R) (%/year) | Not- overweight women in 2005 (Number of people) <sup>1</sup> | Overweight women in 2005 (Number of people) <sup>2</sup> | Obese women in 2005 (Number of people) <sup>3</sup> |
|-----------|------------------------------|---------------------------------------------------------------|----------------------------------------------------------|-----------------------------------------------------|
| 0-4       | 0.00359                      | 16823                                                         | 3960                                                     | 717                                                 |
| 5-9       | 0.00032                      | 19515                                                         | 2396                                                     | 348                                                 |
| 10-14     | 0.00043                      | 17621                                                         | 3297                                                     | 568                                                 |
| 15-19     | 0.00089                      | 14034                                                         | 4266                                                     | 682                                                 |
| 20-24     | 0.00129                      | 10978                                                         | 3710                                                     | 1363                                                |
| 25-29     | 0.00132                      | 6627                                                          | 3732                                                     | 1709                                                |
| 30-34     | 0.00175                      | 5557                                                          | 3632                                                     | 2179                                                |
| 35-39     | 0.00126                      | 3440                                                          | 3638                                                     | 2381                                                |
| 40-44     | 0.00136                      | 2522                                                          | 3524                                                     | 1701                                                |
| 45-49     | 0.00243                      | 1751                                                          | 2781                                                     | 1614                                                |
| 50-54     | 0.00472                      | 1377                                                          | 2084                                                     | 1519                                                |
| 55-59     | 0.00699                      | 937                                                           | 1506                                                     | 1171                                                |

†Values used in this table are for the urban population

<sup>1</sup> Initial value used in the stock of not-overweight population in 2005 for lower SES.

<sup>2</sup> Initial value used in the stock of overweight population in 2005 for lower SES.

<sup>3</sup> Initial value used in the stock of obese population in 2005 for lower SES.

**Table 146. Man mortality rates and population size by age group for the middle socioeconomic status population (Orinoquia y Amazonia region) †**

| Age group | Mortality rates (R) (%/year) | Not- overweight men in 2005 (Number of people) <sup>1</sup> | Overweight men in 2005 (Number of people) <sup>2</sup> | Obese men in 2005 (Number of people) <sup>3</sup> |
|-----------|------------------------------|-------------------------------------------------------------|--------------------------------------------------------|---------------------------------------------------|
| 0-4       | 0.00350                      | 6965                                                        | 1914                                                   | 448                                               |
| 5-9       | 0.00043                      | 7071                                                        | 1358                                                   | 559                                               |
| 10-14     | 0.00022                      | 7041                                                        | 1578                                                   | 567                                               |
| 15-19     | 0.00174                      | 6279                                                        | 949                                                    | 226                                               |
| 20-24     | 0.00513                      | 3716                                                        | 1786                                                   | 386                                               |

|       |         |      |      |      |
|-------|---------|------|------|------|
| 25-29 | 0.00426 | 2771 | 2302 | 895  |
| 30-34 | 0.00426 | 2027 | 2027 | 946  |
| 35-39 | 0.00307 | 1624 | 2962 | 1051 |
| 40-44 | 0.00421 | 1542 | 1851 | 1041 |
| 45-49 | 0.00342 | 1194 | 1520 | 688  |
| 50-54 | 0.00538 | 817  | 1241 | 425  |
| 55-59 | 0.00882 | 363  | 686  | 444  |

†Values used in this table are for the urban population

1 Initial value used in the stock of not-overweight population in 2005 for middle SES.

2 Initial value used in the stock of overweight population in 2005 for middle SES.

3 Initial value used in the stock of obese population in 2005 for middle SES.

**Table 147. Women mortality rates and population size by age group for the middle socioeconomic status population (Orinoquia y Amazonia region) †**

| Age group | Mortality rates (R) (%/year) | Not- overweight women in 2005 (Number of people) <sup>1</sup> | Overweight women in 2005 (Number of people) <sup>2</sup> | Obese women in 2005 (Number of people) <sup>3</sup> |
|-----------|------------------------------|---------------------------------------------------------------|----------------------------------------------------------|-----------------------------------------------------|
| 0-4       | 0.00359                      | 7637                                                          | 1235                                                     | 229                                                 |
| 5-9       | 0.00032                      | 7085                                                          | 1312                                                     | 562                                                 |
| 10-14     | 0.00043                      | 7169                                                          | 1441                                                     | 645                                                 |
| 15-19     | 0.00089                      | 5867                                                          | 1625                                                     | 357                                                 |
| 20-24     | 0.00129                      | 4268                                                          | 1224                                                     | 686                                                 |
| 25-29     | 0.00132                      | 3927                                                          | 1827                                                     | 670                                                 |
| 30-34     | 0.00175                      | 2150                                                          | 2239                                                     | 1194                                                |
| 35-39     | 0.00126                      | 2221                                                          | 2264                                                     | 1751                                                |
| 40-44     | 0.00136                      | 1491                                                          | 1725                                                     | 1549                                                |
| 45-49     | 0.00243                      | 860                                                           | 1453                                                     | 1275                                                |
| 50-54     | 0.00472                      | 445                                                           | 1167                                                     | 945                                                 |
| 55-59     | 0.00699                      | 406                                                           | 518                                                      | 631                                                 |

†Values used in this table are for the urban population

1 Initial value used in the stock of not-overweight population in 2005 for middle SES.

2 Initial value used in the stock of overweight population in 2005 for middle SES.

3 Initial value used in the stock of obese population in 2005 for middle SES.

**Table 148. Man mortality rates and population size by age group for the higher socioeconomic status population (Orinoquia y Amazonia region) †**

| Age group | Mortality rates (R) (%/year) | Not- overweight men in 2005 (Number of people) <sup>1</sup> | Overweight men in 2005 (Number of people) <sup>2</sup> | Obese men in 2005 (Number of people) <sup>3</sup> |
|-----------|------------------------------|-------------------------------------------------------------|--------------------------------------------------------|---------------------------------------------------|
| 0-4       | 0.00350                      | 4806                                                        | 1263                                                   | 285                                               |
| 5-9       | 0.00043                      | 3995                                                        | 1318                                                   | 719                                               |
| 10-14     | 0.00022                      | 5099                                                        | 971                                                    | 526                                               |
| 15-19     | 0.00174                      | 5285                                                        | 949                                                    | 407                                               |
| 20-24     | 0.00513                      | 3089                                                        | 1207                                                   | 434                                               |
| 25-29     | 0.00426                      | 2857                                                        | 1876                                                   | 597                                               |
| 30-34     | 0.00426                      | 1442                                                        | 2433                                                   | 901                                               |
| 35-39     | 0.00307                      | 1003                                                        | 2102                                                   | 1290                                              |
| 40-44     | 0.00421                      | 733                                                         | 2429                                                   | 1581                                              |
| 45-49     | 0.00342                      | 905                                                         | 1809                                                   | 941                                               |
| 50-54     | 0.00538                      | 490                                                         | 1143                                                   | 719                                               |
| 55-59     | 0.00882                      | 444                                                         | 847                                                    | 887                                               |

†Values used in this table are for the urban population

1 Initial value used in the stock of not-overweight population in 2005 for higher SES.

2 Initial value used in the stock of overweight population in 2005 for higher SES.

3 Initial value used in the stock of obese population in 2005 for higher SES.

**Table 149. Women mortality rates and population size by age group for the higher socioeconomic status population (Orinoquia y Amazonia region) †**

| Age group | Mortality rates (R) (%/year) | Not- overweight women in 2005 (Number of people) <sup>1</sup> | Overweight women in 2005 (Number of people) <sup>2</sup> | Obese women in 2005 (Number of people) <sup>3</sup> |
|-----------|------------------------------|---------------------------------------------------------------|----------------------------------------------------------|-----------------------------------------------------|
| 0-4       | 0.00359                      | 4773                                                          | 1082                                                     | 344                                                 |
| 5-9       | 0.00032                      | 4489                                                          | 1153                                                     | 371                                                 |
| 10-14     | 0.00043                      | 4767                                                          | 1461                                                     | 418                                                 |
| 15-19     | 0.00089                      | 5468                                                          | 1102                                                     | 424                                                 |
| 20-24     | 0.00129                      | 3461                                                          | 1041                                                     | 459                                                 |
| 25-29     | 0.00132                      | 3890                                                          | 1187                                                     | 659                                                 |
| 30-34     | 0.00175                      | 3047                                                          | 1523                                                     | 762                                                 |
| 35-39     | 0.00126                      | 1511                                                          | 2252                                                     | 1099                                                |
| 40-44     | 0.00136                      | 1721                                                          | 2160                                                     | 1215                                                |
| 45-49     | 0.00243                      | 1018                                                          | 1511                                                     | 1326                                                |
| 50-54     | 0.00472                      | 454                                                           | 1161                                                     | 807                                                 |
| 55-59     | 0.00699                      | 471                                                           | 825                                                      | 972                                                 |

†Values used in this table are for the urban population

<sup>1</sup> Initial value used in the stock of not-overweight population in 2005 for higher SES.

<sup>2</sup> Initial value used in the stock of overweight population in 2005 for higher SES.

<sup>3</sup> Initial value used in the stock of obese population in 2005 for higher SES.

**Table 150. Data and projections of the Fertility rates by department and Region (Orinoquia y Amazonia region) †**

| Year | Fecundity Rate Depto 81 | Fecundity Rate Depto 85 | Fecundity Rate Depto 86 | Fecundity Rate Depto 91 | Fecundity Rate Depto 94 | Fecundity Rate Depto 95 | Fecundity Rate Depto 97 | Fecundity Rate Depto 99 | Average Region Fecundity Rate |
|------|-------------------------|-------------------------|-------------------------|-------------------------|-------------------------|-------------------------|-------------------------|-------------------------|-------------------------------|
| 2005 | 4,0058                  | 3,1197                  | 3,5644                  | 4,3448                  | 4,3448                  | 4,3448                  | 4,3448                  | 4,3448                  | 4,052                         |
| 2006 | 3,9757                  | 3,0478                  | 3,4811                  | 4,2532                  | 4,2532                  | 4,2532                  | 4,2532                  | 4,2532                  | 3,971                         |
| 2007 | 3,9456                  | 2,9759                  | 3,3978                  | 4,1616                  | 4,1616                  | 4,1616                  | 4,1616                  | 4,1616                  | 3,891                         |
| 2008 | 3,9155                  | 2,904                   | 3,3145                  | 4,07                    | 4,07                    | 4,07                    | 4,07                    | 4,07                    | 3,811                         |
| 2009 | 3,862                   | 2,8585                  | 3,262                   | 3,9922                  | 3,9922                  | 3,9922                  | 3,9922                  | 3,9922                  | 3,743                         |
| 2010 | 3,8085                  | 2,813                   | 3,2095                  | 3,9144                  | 3,9144                  | 3,9144                  | 3,9144                  | 3,9144                  | 3,675                         |
| 2011 | 3,755                   | 2,7675                  | 3,157                   | 3,8366                  | 3,8366                  | 3,8366                  | 3,8366                  | 3,8366                  | 3,608                         |
| 2012 | 3,7015                  | 2,722                   | 3,1045                  | 3,7588                  | 3,7588                  | 3,7588                  | 3,7588                  | 3,7588                  | 3,540                         |
| 2013 | 3,648                   | 2,6765                  | 3,052                   | 3,681                   | 3,681                   | 3,681                   | 3,681                   | 3,681                   | 3,473                         |
| 2014 | 3,5732                  | 2,6495                  | 3,0211                  | 3,6205                  | 3,6205                  | 3,6205                  | 3,6205                  | 3,6205                  | 3,418                         |
| 2015 | 3,4984                  | 2,6225                  | 2,9902                  | 3,56                    | 3,56                    | 3,56                    | 3,56                    | 3,56                    | 3,364                         |
| 2016 | 3,4236                  | 2,5955                  | 2,9593                  | 3,4995                  | 3,4995                  | 3,4995                  | 3,4995                  | 3,4995                  | 3,309                         |
| 2017 | 3,3488                  | 2,5685                  | 2,9284                  | 3,439                   | 3,439                   | 3,439                   | 3,439                   | 3,439                   | 3,255                         |
| 2018 | 3,274                   | 2,5415                  | 2,8975                  | 3,3785                  | 3,3785                  | 3,3785                  | 3,3785                  | 3,3785                  | 3,201                         |
| 2019 | 3,1992                  | 2,5145                  | 2,8666                  | 3,318                   | 3,318                   | 3,318                   | 3,318                   | 3,318                   | 3,146                         |

|      |        |        |        |        |        |        |        |        |       |
|------|--------|--------|--------|--------|--------|--------|--------|--------|-------|
| 2020 | 3,1244 | 2,4875 | 2,8357 | 3,2575 | 3,2575 | 3,2575 | 3,2575 | 3,2575 | 3,092 |
| 2021 | 3,0496 | 2,4605 | 2,8048 | 3,197  | 3,197  | 3,197  | 3,197  | 3,197  | 3,037 |
| 2022 | 2,9748 | 2,4335 | 2,7739 | 3,1365 | 3,1365 | 3,1365 | 3,1365 | 3,1365 | 2,983 |
| 2023 | 2,9    | 2,4065 | 2,743  | 3,076  | 3,076  | 3,076  | 3,076  | 3,076  | 2,929 |
| 2024 | 2,8252 | 2,3795 | 2,7121 | 3,0155 | 3,0155 | 3,0155 | 3,0155 | 3,0155 | 2,874 |
| 2025 | 2,7504 | 2,3525 | 2,6812 | 2,955  | 2,955  | 2,955  | 2,955  | 2,955  | 2,820 |
| 2026 | 2,6756 | 2,3255 | 2,6503 | 2,8945 | 2,8945 | 2,8945 | 2,8945 | 2,8945 | 2,765 |
| 2027 | 2,6008 | 2,2985 | 2,6194 | 2,834  | 2,834  | 2,834  | 2,834  | 2,834  | 2,711 |
| 2028 | 2,526  | 2,2715 | 2,5885 | 2,7735 | 2,7735 | 2,7735 | 2,7735 | 2,7735 | 2,657 |
| 2029 | 2,4512 | 2,2445 | 2,5576 | 2,713  | 2,713  | 2,713  | 2,713  | 2,713  | 2,602 |
| 2030 | 2,3764 | 2,2175 | 2,5267 | 2,6525 | 2,6525 | 2,6525 | 2,6525 | 2,6525 | 2,548 |

† Data of Fertility rate of DANE [1] was used to forecast the department's fertility rate from 2005 to 2030. Holt-Winters no seasonal method in EViews 5 (Quantitative Micro Software, LLC) was used to forecast the fertility rate. In the SD model we used data from 2005 to 2030 and the region fertility rate was calculated as the average of all departments' fertility rates.

**Table 151. Fraction of births by departments, body mass index category, and socioeconomic status (Orinoquia y Amazonia region)†**

| Population group |                 | Lower SES (%/year) | Middle SES (%/year) | Higher SES (%/year) | Complete Urban Population (%/year) |
|------------------|-----------------|--------------------|---------------------|---------------------|------------------------------------|
| Department 81    | Not- overweight | 75,00%             | 75,00%              | 88,89%              | 79,63%                             |
|                  | Overweight      | 25,00%             | 25,00%              | 11,11%              | 20,37%                             |
|                  | Obese           | 0,00%              | 0,00%               | 0,00%               | 0,00%                              |
| Department 85    | Not- overweight | 68,75%             | 95,24%              | 71,43%              | 80,39%                             |
|                  | Overweight      | 25,00%             | 0,00%               | 21,43%              | 13,73%                             |
|                  | Obese           | 6,25%              | 4,76%               | 7,14%               | 5,88%                              |
| Department 86    | Not- overweight | 90,91%             | 94,44%              | 35,71%              | 74,42%                             |
|                  | Overweight      | 0,00%              | 5,56%               | 57,14%              | 20,93%                             |
|                  | Obese           | 9,09%              | 0,00%               | 7,14%               | 4,65%                              |
| Department 91    | Not- overweight | 90,70%             | 88,24%              | 81,82%              | 88,73%                             |
|                  | Overweight      | 9,30%              | 11,76%              | 9,09%               | 9,86%                              |
|                  | Obese           | 0,00%              | 0,00%               | 9,09%               | 1,41%                              |
| Department 94    | Not- overweight | 78,95%             | 72,73%              | 66,67%              | 76,36%                             |
|                  | Overweight      | 10,53%             | 27,27%              | 33,33%              | 16,36%                             |
|                  | Obese           | 10,53%             | 0,00%               | 0,00%               | 7,27%                              |
| Department 95    | Not- overweight | 88,89%             | 92,86%              | 80,00%              | 89,09%                             |
|                  | Overweight      | 11,11%             | 7,14%               | 0,00%               | 9,09%                              |
|                  | Obese           | 0,00%              | 0,00%               | 20,00%              | 1,82%                              |
| Department 97    | Not- overweight | 79,31%             | 66,67%              | 100,00%             | 79,03%                             |
|                  | Overweight      | 17,24%             | 33,33%              | 0,00%               | 17,74%                             |
|                  | Obese           | 3,45%              | 0,00%               | 0,00%               | 3,23%                              |
| Department 99    | Not- overweight | 76,19%             | 50,00%              | 100,00%             | 76,00%                             |
|                  | Overweight      | 19,05%             | 50,00%              | 0,00%               | 20,00%                             |
|                  | Obese           | 4,76%              | 0,00%               | 0,00%               | 4,00%                              |

† The fractions of births by each BMI category correspond to the prevalences by BMI category of children aged 0 to 12 months

**Table 152. Prevalent rates of entire population by age group, and body mass index category (Orinoquia y Amazonia region)**

| Departments | Age group | Not- overweight in 2005 | Overweight in 2005 | Obese in 2005 | Not- overweight in 2010 | Overweight in 2010 | Obese in 2010 |
|-------------|-----------|-------------------------|--------------------|---------------|-------------------------|--------------------|---------------|
| Department  | 0-4       | 0.76991                 | 0.21239            | 0.01770       | 0.75099                 | 0.18577            | 0.06324       |

| Departments   | Age group | Not- overweight in 2005 | Overweight in 2005 | Obese in 2005 | Not- overweight in 2010 | Overweight in 2010 | Obese in 2010 |
|---------------|-----------|-------------------------|--------------------|---------------|-------------------------|--------------------|---------------|
| 81            | 5-9       | 0.82266                 | 0.13793            | 0.03941       | 0.82313                 | 0.12245            | 0.05442       |
|               | 10-14     | 0.80711                 | 0.13706            | 0.05584       | 0.79110                 | 0.16438            | 0.04452       |
|               | 15-19     | 0.77714                 | 0.17143            | 0.05143       | 0.78295                 | 0.14729            | 0.06977       |
|               | 20-24     | 0.73864                 | 0.18750            | 0.07386       | 0.66667                 | 0.20000            | 0.13333       |
|               | 25-29     | 0.54651                 | 0.31977            | 0.13372       | 0.47929                 | 0.38462            | 0.13609       |
|               | 30-34     | 0.44138                 | 0.38621            | 0.17241       | 0.37278                 | 0.41420            | 0.21302       |
|               | 35-39     | 0.37226                 | 0.37956            | 0.24818       | 0.37821                 | 0.40385            | 0.21795       |
|               | 40-44     | 0.27737                 | 0.40146            | 0.32117       | 0.31325                 | 0.47590            | 0.21084       |
|               | 45-49     | 0.25714                 | 0.46667            | 0.27619       | 0.28571                 | 0.43651            | 0.27778       |
|               | 50-54     | 0.24675                 | 0.44156            | 0.31169       | 0.30108                 | 0.37634            | 0.32258       |
|               | 55-59     | 0.28571                 | 0.30612            | 0.40816       | 0.30357                 | 0.32143            | 0.37500       |
| Department 85 | 0-4       | 0.80447                 | 0.16760            | 0.02793       | 0.80370                 | 0.16296            | 0.03333       |
|               | 5-9       | 0.84848                 | 0.10909            | 0.04242       | 0.80259                 | 0.13916            | 0.05825       |
|               | 10-14     | 0.82353                 | 0.14379            | 0.03268       | 0.79538                 | 0.15842            | 0.04620       |
|               | 15-19     | 0.81250                 | 0.16250            | 0.02500       | 0.81423                 | 0.15020            | 0.03557       |
|               | 20-24     | 0.74725                 | 0.19231            | 0.06044       | 0.69849                 | 0.23116            | 0.07035       |
|               | 25-29     | 0.60920                 | 0.28161            | 0.10920       | 0.50962                 | 0.34135            | 0.14904       |
|               | 30-34     | 0.54867                 | 0.33628            | 0.11504       | 0.35870                 | 0.42391            | 0.21739       |
|               | 35-39     | 0.28846                 | 0.55769            | 0.15385       | 0.28804                 | 0.50000            | 0.21196       |
|               | 40-44     | 0.28889                 | 0.38889            | 0.32222       | 0.31034                 | 0.38621            | 0.30345       |
|               | 45-49     | 0.27273                 | 0.50649            | 0.22078       | 0.21488                 | 0.54545            | 0.23967       |
|               | 50-54     | 0.24615                 | 0.50769            | 0.24615       | 0.23077                 | 0.45192            | 0.31731       |
| Department 86 | 55-59     | 0.24444                 | 0.40000            | 0.35556       | 0.19118                 | 0.47059            | 0.33824       |
|               | 0-4       | 0.78788                 | 0.16667            | 0.04545       | 0.76923                 | 0.18750            | 0.04327       |
|               | 5-9       | 0.75862                 | 0.18966            | 0.05172       | 0.80451                 | 0.12782            | 0.06767       |
|               | 10-14     | 0.79630                 | 0.12963            | 0.07407       | 0.83122                 | 0.15190            | 0.01688       |
|               | 15-19     | 0.68889                 | 0.15556            | 0.15556       | 0.83505                 | 0.11340            | 0.05155       |
|               | 20-24     | 0.73333                 | 0.11111            | 0.15556       | 0.66851                 | 0.27624            | 0.05525       |
|               | 25-29     | 0.59091                 | 0.34091            | 0.06818       | 0.54211                 | 0.35263            | 0.10526       |
|               | 30-34     | 0.43590                 | 0.48718            | 0.07692       | 0.43151                 | 0.41781            | 0.15068       |
|               | 35-39     | 0.44828                 | 0.41379            | 0.13793       | 0.39831                 | 0.43220            | 0.16949       |
|               | 40-44     | 0.33333                 | 0.50000            | 0.16667       | 0.37190                 | 0.39669            | 0.23140       |
|               | 45-49     | 0.36842                 | 0.42105            | 0.21053       | 0.25275                 | 0.48352            | 0.26374       |
| Department 91 | 50-54     | 0.33333                 | 0.46667            | 0.20000       | 0.25806                 | 0.51613            | 0.22581       |
|               | 55-59     | 0.00000                 | 0.33333            | 0.66667       | 0.26415                 | 0.50943            | 0.22642       |
|               | 0-4       | 0.80556                 | 0.14931            | 0.04514       | 0.75000                 | 0.21000            | 0.04000       |
|               | 5-9       | 0.80756                 | 0.16151            | 0.03093       | 0.81385                 | 0.14286            | 0.04329       |
|               | 10-14     | 0.75986                 | 0.18638            | 0.05376       | 0.75000                 | 0.15761            | 0.09239       |
|               | 15-19     | 0.81356                 | 0.13983            | 0.04661       | 0.82051                 | 0.15897            | 0.02051       |
|               | 20-24     | 0.65700                 | 0.24638            | 0.09662       | 0.61146                 | 0.29936            | 0.08917       |
|               | 25-29     | 0.50955                 | 0.32484            | 0.16561       | 0.45185                 | 0.41481            | 0.13333       |
|               | 30-34     | 0.38462                 | 0.38462            | 0.23077       | 0.40580                 | 0.39855            | 0.19565       |
|               | 35-39     | 0.33846                 | 0.40000            | 0.26154       | 0.37255                 | 0.46078            | 0.16667       |
|               | 40-44     | 0.30882                 | 0.47059            | 0.22059       | 0.32000                 | 0.45000            | 0.23000       |
| 45-49         | 0.23232   | 0.41414                 | 0.35354            | 0.11905       | 0.52381                 | 0.35714            |               |

| Departments   | Age group     | Not- overweight in 2005 | Overweight in 2005 | Obese in 2005 | Not- overweight in 2010 | Overweight in 2010 | Obese in 2010 |
|---------------|---------------|-------------------------|--------------------|---------------|-------------------------|--------------------|---------------|
|               | 50-54         | 0.20879                 | 0.49451            | 0.29670       | 0.21333                 | 0.42667            | 0.36000       |
|               | 55-59         | 0.33784                 | 0.35135            | 0.31081       | 0.27451                 | 0.43137            | 0.29412       |
| Department 94 | 0-4           | 0.79741                 | 0.15948            | 0.04310       | 0.74089                 | 0.21457            | 0.04453       |
|               | 5-9           | 0.73333                 | 0.18333            | 0.08333       | 0.71233                 | 0.20548            | 0.08219       |
|               | 10-14         | 0.79389                 | 0.17939            | 0.02672       | 0.74060                 | 0.16541            | 0.09398       |
|               | 15-19         | 0.78421                 | 0.18421            | 0.03158       | 0.72772                 | 0.22277            | 0.04950       |
|               | 20-24         | 0.63190                 | 0.26994            | 0.09816       | 0.60563                 | 0.30282            | 0.09155       |
|               | 25-29         | 0.56098                 | 0.34146            | 0.09756       | 0.37975                 | 0.41139            | 0.20886       |
|               | 30-34         | 0.52414                 | 0.33793            | 0.13793       | 0.35417                 | 0.43750            | 0.20833       |
|               | 35-39         | 0.40940                 | 0.39597            | 0.19463       | 0.32258                 | 0.41935            | 0.25806       |
|               | 40-44         | 0.36029                 | 0.46324            | 0.17647       | 0.20690                 | 0.44828            | 0.34483       |
|               | 45-49         | 0.35238                 | 0.36190            | 0.28571       | 0.30526                 | 0.35789            | 0.33684       |
|               | 50-54         | 0.28395                 | 0.54321            | 0.17284       | 0.19540                 | 0.49425            | 0.31034       |
|               | 55-59         | 0.36620                 | 0.42254            | 0.21127       | 0.30303                 | 0.42424            | 0.27273       |
|               | Department 95 | 0-4                     | 0.76494            | 0.19522       | 0.03984                 | 0.66667            | 0.25490       |
| 5-9           |               | 0.82869                 | 0.15139            | 0.01992       | 0.71498                 | 0.17391            | 0.11111       |
| 10-14         |               | 0.85294                 | 0.13725            | 0.00980       | 0.78889                 | 0.16667            | 0.04444       |
| 15-19         |               | 0.83186                 | 0.15044            | 0.01770       | 0.79574                 | 0.14894            | 0.05532       |
| 20-24         |               | 0.75325                 | 0.21429            | 0.03247       | 0.63309                 | 0.26619            | 0.10072       |
| 25-29         |               | 0.66667                 | 0.29167            | 0.04167       | 0.45370                 | 0.38889            | 0.15741       |
| 30-34         |               | 0.42063                 | 0.42063            | 0.15873       | 0.35238                 | 0.40000            | 0.24762       |
| 35-39         |               | 0.46364                 | 0.40000            | 0.13636       | 0.27586                 | 0.50000            | 0.22414       |
| 40-44         |               | 0.48529                 | 0.41912            | 0.09559       | 0.14151                 | 0.43396            | 0.42453       |
| 45-49         |               | 0.39252                 | 0.42991            | 0.17757       | 0.31731                 | 0.31731            | 0.36538       |
| 50-54         |               | 0.35065                 | 0.51948            | 0.12987       | 0.15584                 | 0.41558            | 0.42857       |
| 55-59         |               | 0.41176                 | 0.39216            | 0.19608       | 0.26415                 | 0.35849            | 0.37736       |
| Department 97 |               | 0-4                     | 0.76494            | 0.19522       | 0.03984                 | 0.48792            | 0.40097       |
|               | 5-9           | 0.82869                 | 0.15139            | 0.01992       | 0.71186                 | 0.25000            | 0.03814       |
|               | 10-14         | 0.85294                 | 0.13725            | 0.00980       | 0.78070                 | 0.20614            | 0.01316       |
|               | 15-19         | 0.83186                 | 0.15044            | 0.01770       | 0.78922                 | 0.20588            | 0.00490       |
|               | 20-24         | 0.75325                 | 0.21429            | 0.03247       | 0.72951                 | 0.21311            | 0.05738       |
|               | 25-29         | 0.66667                 | 0.29167            | 0.04167       | 0.49495                 | 0.39394            | 0.11111       |
|               | 30-34         | 0.42063                 | 0.42063            | 0.15873       | 0.45652                 | 0.40217            | 0.14130       |
|               | 35-39         | 0.46364                 | 0.40000            | 0.13636       | 0.33750                 | 0.50000            | 0.16250       |
|               | 40-44         | 0.48529                 | 0.41912            | 0.09559       | 0.28169                 | 0.52113            | 0.19718       |
|               | 45-49         | 0.39252                 | 0.42991            | 0.17757       | 0.37500                 | 0.41250            | 0.21250       |
|               | 50-54         | 0.35065                 | 0.51948            | 0.12987       | 0.29487                 | 0.50000            | 0.20513       |
|               | 55-59         | 0.41176                 | 0.39216            | 0.19608       | 0.26316                 | 0.44737            | 0.28947       |
|               | Department 99 | 0-4                     | 0.76699            | 0.19417       | 0.03883                 | 0.83951            | 0.12757       |
| 5-9           |               | 0.84064                 | 0.12351            | 0.03586       | 0.77358                 | 0.19340            | 0.03302       |
| 10-14         |               | 0.80349                 | 0.14847            | 0.04803       | 0.76623                 | 0.17316            | 0.06061       |
| 15-19         |               | 0.79888                 | 0.13408            | 0.06704       | 0.80543                 | 0.15385            | 0.04072       |
| 20-24         |               | 0.73077                 | 0.19231            | 0.07692       | 0.60274                 | 0.33562            | 0.06164       |
| 25-29         |               | 0.57554                 | 0.30216            | 0.12230       | 0.47887                 | 0.39437            | 0.12676       |
| 30-34         |               | 0.45455                 | 0.37121            | 0.17424       | 0.42276                 | 0.39837            | 0.17886       |

| Departments | Age group | Not- overweight in 2005 | Overweight in 2005 | Obese in 2005 | Not- overweight in 2010 | Overweight in 2010 | Obese in 2010 |
|-------------|-----------|-------------------------|--------------------|---------------|-------------------------|--------------------|---------------|
|             | 35-39     | 0.33043                 | 0.40000            | 0.26957       | 0.27193                 | 0.54386            | 0.18421       |
|             | 40-44     | 0.28846                 | 0.38462            | 0.32692       | 0.27083                 | 0.41667            | 0.31250       |
|             | 45-49     | 0.29000                 | 0.42000            | 0.29000       | 0.31068                 | 0.38835            | 0.30097       |
|             | 50-54     | 0.34118                 | 0.36471            | 0.29412       | 0.27586                 | 0.50000            | 0.22414       |
|             | 55-59     | 0.16279                 | 0.62791            | 0.20930       | 0.36000                 | 0.42000            | 0.22000       |

**Table 153. Prevalent rates of lower socioeconomic status population by age group, and body mass index category (Orinoquia y Amazonia region)**

| Departments   | Age group | Not- overweight in 2005 | Overweight in 2005 | Obese in 2005 | Not- overweight in 2010 | Overweight in 2010 | Obese in 2010 |
|---------------|-----------|-------------------------|--------------------|---------------|-------------------------|--------------------|---------------|
| Department 81 | 0-4       | 0.74684                 | 0.25316            | 0.00000       | 0.74576                 | 0.20339            | 0.05085       |
|               | 5-9       | 0.89706                 | 0.08824            | 0.01471       | 0.87591                 | 0.09489            | 0.02920       |
|               | 10-14     | 0.83871                 | 0.14516            | 0.01613       | 0.88034                 | 0.07692            | 0.04274       |
|               | 15-19     | 0.82692                 | 0.17308            | 0.00000       | 0.79000                 | 0.12000            | 0.09000       |
|               | 20-24     | 0.79032                 | 0.11290            | 0.09677       | 0.75362                 | 0.10145            | 0.14493       |
|               | 25-29     | 0.65116                 | 0.23256            | 0.11628       | 0.50704                 | 0.38028            | 0.11268       |
|               | 30-34     | 0.56757                 | 0.32432            | 0.10811       | 0.42857                 | 0.39286            | 0.17857       |
|               | 35-39     | 0.51515                 | 0.24242            | 0.24242       | 0.42553                 | 0.27660            | 0.29787       |
|               | 40-44     | 0.34211                 | 0.52632            | 0.13158       | 0.40299                 | 0.38806            | 0.20896       |
|               | 45-49     | 0.50000                 | 0.25000            | 0.25000       | 0.43243                 | 0.37838            | 0.18919       |
|               | 50-54     | 0.20000                 | 0.50000            | 0.30000       | 0.35714                 | 0.35714            | 0.28571       |
| Department 85 | 0-4       | 0.42857                 | 0.28571            | 0.28571       | 0.43750                 | 0.25000            | 0.31250       |
|               | 5-9       | 0.77778                 | 0.20635            | 0.01587       | 0.80822                 | 0.17808            | 0.01370       |
|               | 10-14     | 0.95122                 | 0.04878            | 0.00000       | 0.85366                 | 0.10976            | 0.03659       |
|               | 15-19     | 0.86111                 | 0.13889            | 0.00000       | 0.89189                 | 0.08108            | 0.02703       |
|               | 20-24     | 0.78261                 | 0.17391            | 0.04348       | 0.87037                 | 0.12963            | 0.00000       |
|               | 25-29     | 0.75000                 | 0.20000            | 0.05000       | 0.71667                 | 0.25000            | 0.03333       |
|               | 30-34     | 0.77273                 | 0.13636            | 0.09091       | 0.51020                 | 0.36735            | 0.12245       |
|               | 35-39     | 0.51724                 | 0.34483            | 0.13793       | 0.33333                 | 0.41667            | 0.25000       |
|               | 40-44     | 0.39130                 | 0.47826            | 0.13043       | 0.38095                 | 0.50000            | 0.11905       |
|               | 45-49     | 0.36364                 | 0.45455            | 0.18182       | 0.40741                 | 0.40741            | 0.18519       |
|               | 50-54     | 0.50000                 | 0.50000            | 0.00000       | 0.50000                 | 0.37500            | 0.12500       |
| Department 86 | 55-59     | 0.33333                 | 0.40000            | 0.26667       | 0.21053                 | 0.47368            | 0.31579       |
|               | 0-4       | 0.33333                 | 0.33333            | 0.33333       | 0.18182                 | 0.45455            | 0.36364       |
|               | 5-9       | 0.78788                 | 0.16667            | 0.04545       | 0.78125                 | 0.18750            | 0.03125       |
|               | 10-14     | 0.75862                 | 0.18966            | 0.05172       | 0.81818                 | 0.12121            | 0.06061       |
|               | 15-19     | 0.79630                 | 0.12963            | 0.07407       | 0.86667                 | 0.12000            | 0.01333       |
|               | 20-24     | 0.68889                 | 0.15556            | 0.15556       | 0.84685                 | 0.11712            | 0.03604       |
|               | 25-29     | 0.73333                 | 0.11111            | 0.15556       | 0.67593                 | 0.26852            | 0.05556       |
|               | 30-34     | 0.59091                 | 0.34091            | 0.06818       | 0.49505                 | 0.37624            | 0.12871       |
|               | 35-39     | 0.43590                 | 0.48718            | 0.07692       | 0.48684                 | 0.40789            | 0.10526       |
|               | 40-44     | 0.44828                 | 0.41379            | 0.13793       | 0.48438                 | 0.37500            | 0.14063       |
|               | 45-49     | 0.33333                 | 0.50000            | 0.16667       | 0.42105                 | 0.28070            | 0.29825       |
|               |           | 0.36842                 | 0.42105            | 0.21053       | 0.22500                 | 0.47500            | 0.30000       |

| Departments   | Age group | Not- overweight in 2005 | Overweight in 2005 | Obese in 2005 | Not- overweight in 2010 | Overweight in 2010 | Obese in 2010 |
|---------------|-----------|-------------------------|--------------------|---------------|-------------------------|--------------------|---------------|
|               | 50-54     | 0.33333                 | 0.46667            | 0.20000       | 0.25806                 | 0.54839            | 0.19355       |
|               | 55-59     | 0.00000                 | 0.33333            | 0.66667       | 0.26667                 | 0.50000            | 0.23333       |
| Department 91 | 0-4       | 0.76748                 | 0.19187            | 0.04065       | 0.73006                 | 0.23313            | 0.03681       |
|               | 5-9       | 0.85308                 | 0.09005            | 0.05687       | 0.85789                 | 0.10526            | 0.03684       |
|               | 10-14     | 0.82573                 | 0.13278            | 0.04149       | 0.76119                 | 0.15672            | 0.08209       |
|               | 15-19     | 0.87772                 | 0.10326            | 0.01902       | 0.83784                 | 0.14865            | 0.01351       |
|               | 20-24     | 0.78268                 | 0.16469            | 0.05263       | 0.57600                 | 0.36000            | 0.06400       |
|               | 25-29     | 0.61024                 | 0.27394            | 0.11581       | 0.44554                 | 0.40594            | 0.14851       |
|               | 30-34     | 0.52577                 | 0.32216            | 0.15206       | 0.44211                 | 0.40000            | 0.15789       |
|               | 35-39     | 0.50535                 | 0.35027            | 0.14439       | 0.38889                 | 0.47222            | 0.13889       |
|               | 40-44     | 0.42781                 | 0.37968            | 0.19251       | 0.32000                 | 0.46667            | 0.21333       |
|               | 45-49     | 0.39308                 | 0.39623            | 0.21069       | 0.13043                 | 0.56522            | 0.30435       |
|               | 50-54     | 0.37638                 | 0.36162            | 0.26199       | 0.30952                 | 0.35714            | 0.33333       |
|               | 55-59     | 0.37879                 | 0.41919            | 0.20202       | 0.32258                 | 0.41935            | 0.25806       |
| Department 94 | 0-4       | 0.76748                 | 0.19187            | 0.04065       | 0.69231                 | 0.30769            | 0.00000       |
|               | 5-9       | 0.85308                 | 0.09005            | 0.05687       | 0.66667                 | 0.22222            | 0.11111       |
|               | 10-14     | 0.82573                 | 0.13278            | 0.04149       | 0.52174                 | 0.26087            | 0.21739       |
|               | 15-19     | 0.87772                 | 0.10326            | 0.01902       | 0.76923                 | 0.23077            | 0.00000       |
|               | 20-24     | 0.78268                 | 0.16469            | 0.05263       | 0.37500                 | 0.50000            | 0.12500       |
|               | 25-29     | 0.61024                 | 0.27394            | 0.11581       | 0.50000                 | 0.40000            | 0.10000       |
|               | 30-34     | 0.52577                 | 0.32216            | 0.15206       | 0.46667                 | 0.26667            | 0.26667       |
|               | 35-39     | 0.50535                 | 0.35027            | 0.14439       | 0.26316                 | 0.57895            | 0.15789       |
|               | 40-44     | 0.42781                 | 0.37968            | 0.19251       | 0.25000                 | 0.43750            | 0.31250       |
|               | 45-49     | 0.39308                 | 0.39623            | 0.21069       | 0.08333                 | 0.25000            | 0.66667       |
|               | 50-54     | 0.37638                 | 0.36162            | 0.26199       | 0.27273                 | 0.27273            | 0.45455       |
|               | 55-59     | 0.37879                 | 0.41919            | 0.20202       | 0.30000                 | 0.30000            | 0.40000       |
| Department 95 | 0-4       | 0.76748                 | 0.19187            | 0.04065       | 0.68681                 | 0.24725            | 0.06593       |
|               | 5-9       | 0.85308                 | 0.09005            | 0.05687       | 0.71345                 | 0.16959            | 0.11696       |
|               | 10-14     | 0.82573                 | 0.13278            | 0.04149       | 0.79237                 | 0.17373            | 0.03390       |
|               | 15-19     | 0.87772                 | 0.10326            | 0.01902       | 0.80303                 | 0.15152            | 0.04545       |
|               | 20-24     | 0.78268                 | 0.16469            | 0.05263       | 0.62609                 | 0.26087            | 0.11304       |
|               | 25-29     | 0.61024                 | 0.27394            | 0.11581       | 0.44681                 | 0.39362            | 0.15957       |
|               | 30-34     | 0.52577                 | 0.32216            | 0.15206       | 0.37079                 | 0.35955            | 0.26966       |
|               | 35-39     | 0.50535                 | 0.35027            | 0.14439       | 0.28000                 | 0.51000            | 0.21000       |
|               | 40-44     | 0.42781                 | 0.37968            | 0.19251       | 0.15000                 | 0.43750            | 0.41250       |
|               | 45-49     | 0.39308                 | 0.39623            | 0.21069       | 0.36364                 | 0.29870            | 0.33766       |
|               | 50-54     | 0.37638                 | 0.36162            | 0.26199       | 0.14286                 | 0.39683            | 0.46032       |
|               | 55-59     | 0.37879                 | 0.41919            | 0.20202       | 0.29268                 | 0.34146            | 0.36585       |
| Department 97 | 0-4       | 0.76793                 | 0.18987            | 0.04219       | 0.49000                 | 0.40500            | 0.10500       |
|               | 5-9       | 0.83043                 | 0.15217            | 0.01739       | 0.71739                 | 0.24348            | 0.03913       |
|               | 10-14     | 0.86347                 | 0.12915            | 0.00738       | 0.78995                 | 0.19635            | 0.01370       |
|               | 15-19     | 0.84264                 | 0.13706            | 0.02030       | 0.79000                 | 0.20500            | 0.00500       |
|               | 20-24     | 0.76471                 | 0.20588            | 0.02941       | 0.73109                 | 0.21008            | 0.05882       |
|               | 25-29     | 0.64894                 | 0.29787            | 0.05319       | 0.49451                 | 0.38462            | 0.12088       |
|               | 30-34     | 0.44898                 | 0.38776            | 0.16327       | 0.46914                 | 0.40741            | 0.12346       |



| Departments   | Age group | Not- overweight in 2005 | Overweight in 2005 | Obese in 2005 | Not- overweight in 2010 | Overweight in 2010 | Obese in 2010 |
|---------------|-----------|-------------------------|--------------------|---------------|-------------------------|--------------------|---------------|
|               | 35-39     | 0.46237                 | 0.39785            | 0.13978       | 0.33784                 | 0.50000            | 0.16216       |
|               | 40-44     | 0.50000                 | 0.41667            | 0.08333       | 0.27941                 | 0.54412            | 0.17647       |
|               | 45-49     | 0.35714                 | 0.45238            | 0.19048       | 0.38961                 | 0.40260            | 0.20779       |
|               | 50-54     | 0.36667                 | 0.48333            | 0.15000       | 0.28571                 | 0.50649            | 0.20779       |
|               | 55-59     | 0.41463                 | 0.34146            | 0.24390       | 0.27273                 | 0.48485            | 0.24242       |
| Department 99 | 0-4       | 0.78125                 | 0.18125            | 0.03750       | 0.84120                 | 0.12876            | 0.03004       |
|               | 5-9       | 0.85714                 | 0.11111            | 0.03175       | 0.78109                 | 0.18408            | 0.03483       |
|               | 10-14     | 0.82635                 | 0.13772            | 0.03593       | 0.76498                 | 0.17512            | 0.05991       |
|               | 15-19     | 0.79200                 | 0.12800            | 0.08000       | 0.81106                 | 0.14747            | 0.04147       |
|               | 20-24     | 0.72152                 | 0.20253            | 0.07595       | 0.61314                 | 0.32117            | 0.06569       |
|               | 25-29     | 0.55446                 | 0.32673            | 0.11881       | 0.46094                 | 0.42188            | 0.11719       |
|               | 30-34     | 0.46429                 | 0.38095            | 0.15476       | 0.43860                 | 0.37719            | 0.18421       |
|               | 35-39     | 0.36000                 | 0.40000            | 0.24000       | 0.27451                 | 0.54902            | 0.17647       |
|               | 40-44     | 0.37097                 | 0.35484            | 0.27419       | 0.29213                 | 0.43820            | 0.26966       |
|               | 45-49     | 0.25862                 | 0.41379            | 0.32759       | 0.33333                 | 0.38710            | 0.27957       |
|               | 50-54     | 0.36667                 | 0.35000            | 0.28333       | 0.27778                 | 0.51852            | 0.20370       |
|               | 55-59     | 0.17857                 | 0.67857            | 0.14286       | 0.34783                 | 0.43478            | 0.21739       |

**Table 154. Prevalent rates of middle socioeconomic status population by age group, and body mass index category (Orinoquia y Amazonia region)**

| Departments   | Age group | Not- overweight in 2005 | Overweight in 2005 | Obese in 2005 | Not- overweight in 2010 | Overweight in 2010 | Obese in 2010 |
|---------------|-----------|-------------------------|--------------------|---------------|-------------------------|--------------------|---------------|
| Department 81 | 0-4       | 0.74444                 | 0.24444            | 0.01111       | 0.76860                 | 0.16529            | 0.06612       |
|               | 5-9       | 0.79070                 | 0.16279            | 0.04651       | 0.80451                 | 0.13534            | 0.06015       |
|               | 10-14     | 0.77632                 | 0.17105            | 0.05263       | 0.76056                 | 0.19014            | 0.04930       |
|               | 15-19     | 0.77465                 | 0.16901            | 0.05634       | 0.80000                 | 0.14615            | 0.05385       |
|               | 20-24     | 0.71014                 | 0.21739            | 0.07246       | 0.62366                 | 0.24731            | 0.12903       |
|               | 25-29     | 0.50000                 | 0.37500            | 0.12500       | 0.45882                 | 0.38824            | 0.15294       |
|               | 30-34     | 0.35714                 | 0.48214            | 0.16071       | 0.35106                 | 0.41489            | 0.23404       |
|               | 35-39     | 0.31481                 | 0.40741            | 0.27778       | 0.40506                 | 0.40506            | 0.18987       |
|               | 40-44     | 0.33333                 | 0.30952            | 0.35714       | 0.26761                 | 0.50704            | 0.22535       |
|               | 45-49     | 0.16667                 | 0.58333            | 0.25000       | 0.23881                 | 0.43284            | 0.32836       |
|               | 50-54     | 0.30769                 | 0.50000            | 0.19231       | 0.26190                 | 0.45238            | 0.28571       |
|               | 55-59     | 0.40000                 | 0.26667            | 0.33333       | 0.26667                 | 0.33333            | 0.40000       |
| Department 85 | 0-4       | 0.84615                 | 0.13846            | 0.01538       | 0.77419                 | 0.18548            | 0.04032       |
|               | 5-9       | 0.82609                 | 0.13043            | 0.04348       | 0.75000                 | 0.20833            | 0.04167       |
|               | 10-14     | 0.81034                 | 0.12069            | 0.06897       | 0.79688                 | 0.15625            | 0.04688       |
|               | 15-19     | 0.80000                 | 0.18000            | 0.02000       | 0.82243                 | 0.13084            | 0.04673       |
|               | 20-24     | 0.66667                 | 0.24074            | 0.09259       | 0.69231                 | 0.20513            | 0.10256       |
|               | 25-29     | 0.48387                 | 0.38710            | 0.12903       | 0.52222                 | 0.31111            | 0.16667       |

| Departments   | Age group     | Not- overweight in 2005 | Overweight in 2005 | Obese in 2005 | Not- overweight in 2010 | Overweight in 2010 | Obese in 2010 |
|---------------|---------------|-------------------------|--------------------|---------------|-------------------------|--------------------|---------------|
|               | 30-34         | 0.68421                 | 0.21053            | 0.10526       | 0.35065                 | 0.40260            | 0.24675       |
|               | 35-39         | 0.32258                 | 0.58065            | 0.09677       | 0.33766                 | 0.46753            | 0.19481       |
|               | 40-44         | 0.36000                 | 0.36000            | 0.28000       | 0.29630                 | 0.33333            | 0.37037       |
|               | 45-49         | 0.16667                 | 0.58333            | 0.25000       | 0.19048                 | 0.52381            | 0.28571       |
|               | 50-54         | 0.22222                 | 0.44444            | 0.33333       | 0.26471                 | 0.26471            | 0.47059       |
|               | 55-59         | 0.29412                 | 0.23529            | 0.47059       | 0.24138                 | 0.44828            | 0.31034       |
| Department 86 | 0-4           | 0.76190                 | 0.15873            | 0.07937       | 0.76389                 | 0.18056            | 0.05556       |
|               | 5-9           | 0.85294                 | 0.11765            | 0.02941       | 0.75824                 | 0.15385            | 0.08791       |
|               | 10-14         | 0.72222                 | 0.19444            | 0.08333       | 0.74026                 | 0.23377            | 0.02597       |
|               | 15-19         | 0.77273                 | 0.18182            | 0.04545       | 0.83784                 | 0.10811            | 0.05405       |
|               | 20-24         | 0.60000                 | 0.28889            | 0.11111       | 0.64789                 | 0.29577            | 0.05634       |
|               | 25-29         | 0.62745                 | 0.25490            | 0.11765       | 0.59524                 | 0.33333            | 0.07143       |
|               | 30-34         | 0.31111                 | 0.44444            | 0.24444       | 0.37705                 | 0.40984            | 0.21311       |
|               | 35-39         | 0.31707                 | 0.48780            | 0.19512       | 0.29787                 | 0.48936            | 0.21277       |
|               | 40-44         | 0.33333                 | 0.40741            | 0.25926       | 0.32075                 | 0.50943            | 0.16981       |
|               | 45-49         | 0.30000                 | 0.45000            | 0.25000       | 0.25581                 | 0.48837            | 0.25581       |
|               | 50-54         | 0.17391                 | 0.39130            | 0.43478       | 0.25000                 | 0.46429            | 0.28571       |
|               | 55-59         | 0.11111                 | 0.38889            | 0.50000       | 0.26667                 | 0.60000            | 0.13333       |
|               | Department 91 | 0-4                     | 0.78824            | 0.17059       | 0.04118                 | 0.81250            | 0.12500       |
| 5-9           |               | 0.89655                 | 0.08621            | 0.01724       | 0.66667                 | 0.25000            | 0.08333       |
| 10-14         |               | 0.89041                 | 0.08219            | 0.02740       | 0.78049                 | 0.12195            | 0.09756       |
| 15-19         |               | 0.86813                 | 0.12088            | 0.01099       | 0.85000                 | 0.12500            | 0.02500       |
| 20-24         |               | 0.81065                 | 0.12426            | 0.06509       | 0.77419                 | 0.06452            | 0.16129       |
| 25-29         |               | 0.63830                 | 0.24823            | 0.11348       | 0.51724                 | 0.37931            | 0.10345       |
| 30-34         |               | 0.53846                 | 0.36538            | 0.09615       | 0.36842                 | 0.34211            | 0.28947       |
| 35-39         |               | 0.56075                 | 0.30841            | 0.13084       | 0.40000                 | 0.40000            | 0.20000       |
| 40-44         |               | 0.35238                 | 0.45714            | 0.19048       | 0.38889                 | 0.33333            | 0.27778       |
| 45-49         |               | 0.37374                 | 0.45455            | 0.17172       | 0.13793                 | 0.48276            | 0.37931       |
| 50-54         |               | 0.37143                 | 0.37143            | 0.25714       | 0.07692                 | 0.50000            | 0.42308       |
| 55-59         |               | 0.54000                 | 0.32000            | 0.14000       | 0.20000                 | 0.53333            | 0.26667       |
| Department 94 |               | 0-4                     | 0.78824            | 0.17059       | 0.04118                 | 0.74359            | 0.20940       |
|               | 5-9           | 0.89655                 | 0.08621            | 0.01724       | 0.71642                 | 0.20398            | 0.07960       |
|               | 10-14         | 0.89041                 | 0.08219            | 0.02740       | 0.76132                 | 0.15638            | 0.08230       |
|               | 15-19         | 0.86813                 | 0.12088            | 0.01099       | 0.72487                 | 0.22222            | 0.05291       |
|               | 20-24         | 0.81065                 | 0.12426            | 0.06509       | 0.61940                 | 0.29104            | 0.08955       |
|               | 25-29         | 0.63830                 | 0.24823            | 0.11348       | 0.37162                 | 0.41216            | 0.21622       |
|               | 30-34         | 0.53846                 | 0.36538            | 0.09615       | 0.34375                 | 0.46094            | 0.19531       |
|               | 35-39         | 0.56075                 | 0.30841            | 0.13084       | 0.33333                 | 0.39048            | 0.27619       |
|               | 40-44         | 0.35238                 | 0.45714            | 0.19048       | 0.20000                 | 0.45000            | 0.35000       |
|               | 45-49         | 0.37374                 | 0.45455            | 0.17172       | 0.34146                 | 0.36585            | 0.29268       |
|               | 50-54         | 0.37143                 | 0.37143            | 0.25714       | 0.18421                 | 0.52632            | 0.28947       |
|               | 55-59         | 0.54000                 | 0.32000            | 0.14000       | 0.30357                 | 0.44643            | 0.25000       |
|               | Department 95 | 0-4                     | 0.78824            | 0.17059       | 0.04118                 | 0.50000            | 0.31818       |
| 5-9           |               | 0.89655                 | 0.08621            | 0.01724       | 0.71429                 | 0.20000            | 0.08571       |
| 10-14         |               | 0.89041                 | 0.08219            | 0.02740       | 0.77419                 | 0.12903            | 0.09677       |

| Departments   | Age group | Not- overweight in 2005 | Overweight in 2005 | Obese in 2005 | Not- overweight in 2010 | Overweight in 2010 | Obese in 2010 |
|---------------|-----------|-------------------------|--------------------|---------------|-------------------------|--------------------|---------------|
|               | 15-19     | 0.86813                 | 0.12088            | 0.01099       | 0.77778                 | 0.11111            | 0.11111       |
|               | 20-24     | 0.81065                 | 0.12426            | 0.06509       | 0.69565                 | 0.26087            | 0.04348       |
|               | 25-29     | 0.63830                 | 0.24823            | 0.11348       | 0.46154                 | 0.38462            | 0.15385       |
|               | 30-34     | 0.53846                 | 0.36538            | 0.09615       | 0.28571                 | 0.57143            | 0.14286       |
|               | 35-39     | 0.56075                 | 0.30841            | 0.13084       | 0.26667                 | 0.40000            | 0.33333       |
|               | 40-44     | 0.35238                 | 0.45714            | 0.19048       | 0.12000                 | 0.40000            | 0.48000       |
|               | 45-49     | 0.37374                 | 0.45455            | 0.17172       | 0.16000                 | 0.36000            | 0.48000       |
|               | 50-54     | 0.37143                 | 0.37143            | 0.25714       | 0.08333                 | 0.58333            | 0.33333       |
|               | 55-59     | 0.54000                 | 0.32000            | 0.14000       | 0.18182                 | 0.36364            | 0.45455       |
| Department 97 | 0-4       | 0.66667                 | 0.33333            | 0.00000       | 0.42857                 | 0.28571            | 0.28571       |
|               | 5-9       | 0.76471                 | 0.17647            | 0.05882       | 0.50000                 | 0.50000            | 0.00000       |
|               | 10-14     | 0.84615                 | 0.15385            | 0.00000       | 0.71429                 | 0.28571            | 0.00000       |
|               | 15-19     | 0.75000                 | 0.25000            | 0.00000       | 0.66667                 | 0.33333            | 0.00000       |
|               | 20-24     | 0.76923                 | 0.23077            | 0.00000       | 1.00000                 | 0.00000            | 0.00000       |
|               | 25-29     | 0.66667                 | 0.33333            | 0.00000       | 0.57143                 | 0.42857            | 0.00000       |
|               | 30-34     | 0.30000                 | 0.55000            | 0.15000       | 0.40000                 | 0.40000            | 0.20000       |
|               | 35-39     | 0.50000                 | 0.35714            | 0.14286       | 0.33333                 | 0.50000            | 0.16667       |
|               | 40-44     | 0.45000                 | 0.35000            | 0.20000       | 0.33333                 | 0.00000            | 0.66667       |
|               | 45-49     | 0.52632                 | 0.31579            | 0.15789       | 0.00000                 | 0.66667            | 0.33333       |
|               | 50-54     | 0.22222                 | 0.77778            | 0.00000       | 1.00000                 | 0.00000            | 0.00000       |
| Department 99 | 0-4       | 0.73529                 | 0.20588            | 0.05882       | 0.80000                 | 0.10000            | 0.10000       |
|               | 5-9       | 0.80000                 | 0.14000            | 0.06000       | 0.63636                 | 0.36364            | 0.00000       |
|               | 10-14     | 0.75000                 | 0.15385            | 0.09615       | 0.78571                 | 0.14286            | 0.07143       |
|               | 15-19     | 0.82927                 | 0.14634            | 0.02439       | 0.50000                 | 0.50000            | 0.00000       |
|               | 20-24     | 0.80000                 | 0.15000            | 0.05000       | 0.44444                 | 0.55556            | 0.00000       |
|               | 25-29     | 0.51724                 | 0.31034            | 0.17241       | 0.64286                 | 0.14286            | 0.21429       |
|               | 30-34     | 0.39394                 | 0.39394            | 0.21212       | 0.22222                 | 0.66667            | 0.11111       |
|               | 35-39     | 0.25806                 | 0.38710            | 0.35484       | 0.25000                 | 0.50000            | 0.25000       |
|               | 40-44     | 0.14706                 | 0.38235            | 0.47059       | 0.00000                 | 0.14286            | 0.85714       |
|               | 45-49     | 0.35294                 | 0.38235            | 0.26471       | 0.10000                 | 0.40000            | 0.50000       |
|               | 50-54     | 0.27273                 | 0.40909            | 0.31818       | 0.33333                 | 0.33333            | 0.33333       |
| 55-59         | 0.20000   | 0.60000                 | 0.20000            | 0.50000       | 0.25000                 | 0.25000            |               |

**Table 155. Prevalent rates of higher socioeconomic status population by age group, and body mass index category (Orinoquia y Amazonia region)**

| Departments   | Age group | Not- overweight in 2005 | Overweight in 2005 | Obese in 2005 | Not- overweight in 2010 | Overweight in 2010 | Obese in 2010 |
|---------------|-----------|-------------------------|--------------------|---------------|-------------------------|--------------------|---------------|
| Department 81 | 0-4       | 0.84211                 | 0.10526            | 0.05263       | 0.64286                 | 0.21429            | 0.14286       |
|               | 5-9       | 0.77551                 | 0.16327            | 0.06122       | 0.62500                 | 0.20833            | 0.16667       |
|               | 10-14     | 0.81356                 | 0.08475            | 0.10169       | 0.60606                 | 0.36364            | 0.03030       |
|               | 15-19     | 0.73077                 | 0.17308            | 0.09615       | 0.67857                 | 0.25000            | 0.07143       |
|               | 20-24     | 0.71111                 | 0.24444            | 0.04444       | 0.55556                 | 0.33333            | 0.11111       |
|               | 25-29     | 0.52632                 | 0.31579            | 0.15789       | 0.46154                 | 0.38462            | 0.15385       |

| Departments   | Age group | Not- overweight in 2005 | Overweight in 2005 | Obese in 2005 | Not- overweight in 2010 | Overweight in 2010 | Obese in 2010 |
|---------------|-----------|-------------------------|--------------------|---------------|-------------------------|--------------------|---------------|
|               | 30-34     | 0.44231                 | 0.32692            | 0.23077       | 0.31579                 | 0.47368            | 0.21053       |
|               | 35-39     | 0.34000                 | 0.44000            | 0.22000       | 0.23333                 | 0.60000            | 0.16667       |
|               | 40-44     | 0.19298                 | 0.38596            | 0.42105       | 0.21429                 | 0.60714            | 0.17857       |
|               | 45-49     | 0.22449                 | 0.46939            | 0.30612       | 0.18182                 | 0.54545            | 0.27273       |
|               | 50-54     | 0.22581                 | 0.35484            | 0.41935       | 0.30435                 | 0.26087            | 0.43478       |
|               | 55-59     | 0.10000                 | 0.35000            | 0.55000       | 0.20000                 | 0.40000            | 0.40000       |
| Department 85 | 0-4       | 0.78431                 | 0.15686            | 0.05882       | 0.84932                 | 0.10959            | 0.04110       |
|               | 5-9       | 0.80000                 | 0.12727            | 0.07273       | 0.82243                 | 0.08411            | 0.09346       |
|               | 10-14     | 0.81356                 | 0.16949            | 0.01695       | 0.72277                 | 0.21782            | 0.05941       |
|               | 15-19     | 0.84375                 | 0.14063            | 0.01563       | 0.77174                 | 0.18478            | 0.04348       |
|               | 20-24     | 0.80882                 | 0.14706            | 0.04412       | 0.68852                 | 0.24590            | 0.06557       |
|               | 25-29     | 0.61765                 | 0.27941            | 0.10294       | 0.49275                 | 0.36232            | 0.14493       |
|               | 30-34     | 0.45652                 | 0.43478            | 0.10870       | 0.38028                 | 0.45070            | 0.16901       |
|               | 35-39     | 0.22000                 | 0.58000            | 0.20000       | 0.16923                 | 0.53846            | 0.29231       |
|               | 40-44     | 0.20930                 | 0.37209            | 0.41860       | 0.28125                 | 0.42188            | 0.29688       |
|               | 45-49     | 0.27907                 | 0.46512            | 0.25581       | 0.15873                 | 0.60317            | 0.23810       |
|               | 50-54     | 0.21875                 | 0.59375            | 0.18750       | 0.21569                 | 0.56863            | 0.21569       |
|               | 55-59     | 0.18182                 | 0.54545            | 0.27273       | 0.14286                 | 0.50000            | 0.35714       |
| Department 91 | 0-4       | 0.72826                 | 0.20652            | 0.06522       | 1.00000                 | 0.00000            | 0.00000       |
|               | 5-9       | 0.74390                 | 0.13415            | 0.12195       | 0.20000                 | 0.80000            | 0.00000       |
|               | 10-14     | 0.68132                 | 0.24176            | 0.07692       | 0.44444                 | 0.33333            | 0.22222       |
|               | 15-19     | 0.81379                 | 0.14483            | 0.04138       | 0.28571                 | 0.57143            | 0.14286       |
|               | 20-24     | 0.72961                 | 0.20601            | 0.06438       | 0.00000                 | 0.00000            | 1.00000       |
|               | 25-29     | 0.60989                 | 0.28022            | 0.10989       | 0.20000                 | 0.80000            | 0.00000       |
|               | 30-34     | 0.41808                 | 0.36158            | 0.22034       | 0.00000                 | 0.80000            | 0.20000       |
|               | 35-39     | 0.40000                 | 0.42581            | 0.17419       | 0.00000                 | 0.60000            | 0.40000       |
|               | 40-44     | 0.35526                 | 0.39474            | 0.25000       | 0.14286                 | 0.57143            | 0.28571       |
|               | 45-49     | 0.36301                 | 0.41781            | 0.21918       | 0.00000                 | 0.44444            | 0.55556       |
|               | 50-54     | 0.25833                 | 0.42500            | 0.31667       | 0.14286                 | 0.57143            | 0.28571       |
|               | 55-59     | 0.23762                 | 0.53465            | 0.22772       | 0.20000                 | 0.20000            | 0.60000       |

**Table 156. Mortality rates and population size by age group at the department level without segregate by socioeconomic status (Orinoquia y Amazonia region) †**

| Departments   | Age group | Mortality rates (R) (%/year) | Not-overweight population in 2005 (Number of people) <sup>1</sup> | Overweight population in 2005 (Number of people) <sup>2</sup> | Obese population in 2005 (Number of people) <sup>3</sup> |
|---------------|-----------|------------------------------|-------------------------------------------------------------------|---------------------------------------------------------------|----------------------------------------------------------|
| Department 81 | 0-4       | 0.00364                      | 14605                                                             | 4029                                                          | 336                                                      |
|               | 5-9       | 0.00035                      | 14077                                                             | 2360                                                          | 674                                                      |
|               | 10-14     | 0.00038                      | 12903                                                             | 2191                                                          | 893                                                      |
|               | 15-19     | 0.00192                      | 10916                                                             | 2408                                                          | 722                                                      |
|               | 20-24     | 0.00369                      | 9600                                                              | 2437                                                          | 960                                                      |
|               | 25-29     | 0.00263                      | 6017                                                              | 3521                                                          | 1472                                                     |

|    |  |                   |              |         |       |      |      |
|----|--|-------------------|--------------|---------|-------|------|------|
| 1  |  |                   |              |         |       |      |      |
| 2  |  |                   |              |         |       |      |      |
| 3  |  | <b>30-34</b>      | 0.00211      | 4383    | 3835  | 1712 |      |
| 4  |  | <b>35-39</b>      | 0.00198      | 3385    | 3452  | 2257 |      |
| 5  |  | <b>40-44</b>      | 0.00268      | 2274    | 3291  | 2633 |      |
| 6  |  | <b>45-49</b>      | 0.00276      | 1675    | 3040  | 1799 |      |
| 7  |  | <b>50-54</b>      | 0.00547      | 1128    | 2018  | 1425 |      |
| 8  |  | <b>55-59</b>      | 0.00801      | 999     | 1071  | 1427 |      |
| 9  |  |                   |              |         |       |      |      |
| 10 |  | <b>Department</b> |              |         |       |      |      |
| 11 |  | <b>85</b>         | <b>0-4</b>   | 0.00325 | 18069 | 3764 | 627  |
| 12 |  |                   | <b>5-9</b>   | 0.00026 | 19677 | 2530 | 984  |
| 13 |  |                   | <b>10-14</b> | 0.00047 | 19071 | 3330 | 757  |
| 14 |  |                   | <b>15-19</b> | 0.00114 | 17111 | 3422 | 527  |
| 15 |  |                   | <b>20-24</b> | 0.00246 | 13078 | 3366 | 1058 |
| 16 |  |                   | <b>25-29</b> | 0.00259 | 10354 | 4786 | 1856 |
| 17 |  |                   | <b>30-34</b> | 0.00271 | 8511  | 5216 | 1785 |
| 18 |  |                   | <b>35-39</b> | 0.00228 | 4173  | 8068 | 2226 |
| 19 |  |                   | <b>40-44</b> | 0.00230 | 3519  | 4737 | 3925 |
| 20 |  |                   | <b>45-49</b> | 0.00254 | 2577  | 4786 | 2086 |
| 21 |  |                   | <b>50-54</b> | 0.00430 | 1776  | 3664 | 1776 |
| 22 |  |                   | <b>55-59</b> | 0.00946 | 1344  | 2199 | 1955 |
| 23 |  |                   |              |         |       |      |      |
| 24 |  | <b>Department</b> | <b>0-4</b>   | 0.00300 | 12885 | 2726 | 743  |
| 25 |  | <b>86</b>         | <b>5-9</b>   | 0.00024 | 12709 | 3177 | 867  |
| 26 |  |                   | <b>10-14</b> | 0.00012 | 13359 | 2175 | 1243 |
| 27 |  |                   | <b>15-19</b> | 0.00175 | 10227 | 2309 | 2309 |
| 28 |  |                   | <b>20-24</b> | 0.00407 | 9901  | 1500 | 2100 |
| 29 |  |                   | <b>25-29</b> | 0.00274 | 6891  | 3975 | 795  |
| 30 |  |                   | <b>30-34</b> | 0.00449 | 4081  | 4561 | 720  |
| 31 |  |                   | <b>35-39</b> | 0.00185 | 3885  | 3586 | 1195 |
| 32 |  |                   | <b>40-44</b> | 0.00284 | 2349  | 3524 | 1175 |
| 33 |  |                   | <b>45-49</b> | 0.00373 | 2073  | 2369 | 1185 |
| 34 |  |                   | <b>50-54</b> | 0.00636 | 1416  | 1982 | 850  |
| 35 |  |                   | <b>55-59</b> | 0.00633 | 0     | 1053 | 2105 |
| 36 |  |                   |              |         |       |      |      |
| 37 |  | <b>Department</b> | <b>0-4</b>   | 0.01074 | 2249  | 417  | 126  |
| 38 |  | <b>91</b>         | <b>5-9</b>   | 0.00087 | 2795  | 559  | 107  |
| 39 |  |                   | <b>10-14</b> | 0.00080 | 2857  | 701  | 202  |
| 40 |  |                   | <b>15-19</b> | 0.00107 | 3027  | 520  | 173  |
| 41 |  |                   | <b>20-24</b> | 0.00129 | 1529  | 573  | 225  |
| 42 |  |                   | <b>25-29</b> | 0.00428 | 834   | 532  | 271  |
| 43 |  |                   | <b>30-34</b> | 0.00412 | 654   | 654  | 393  |
| 44 |  |                   | <b>35-39</b> | 0.00183 | 553   | 654  | 428  |
| 45 |  |                   | <b>40-44</b> | 0.00280 | 442   | 673  | 315  |
| 46 |  |                   | <b>45-49</b> | 0.00286 | 244   | 435  | 371  |
| 47 |  |                   | <b>50-54</b> | 0.00626 | 167   | 395  | 237  |
| 48 |  |                   | <b>55-59</b> | 0.00954 | 177   | 184  | 163  |
| 49 |  |                   |              |         |       |      |      |
| 50 |  | <b>Department</b> | <b>0-4</b>   | 0.00661 | 1086  | 217  | 59   |
| 51 |  | <b>94</b>         | <b>5-9</b>   | 0.00182 | 1206  | 301  | 137  |
| 52 |  |                   | <b>10-14</b> | 0.00000 | 1355  | 306  | 46   |
| 53 |  |                   | <b>15-19</b> | 0.00073 | 1070  | 251  | 43   |
| 54 |  |                   | <b>20-24</b> | 0.00531 | 476   | 203  | 74   |
| 55 |  |                   |              |         |       |      |      |
| 56 |  |                   |              |         |       |      |      |
| 57 |  |                   |              |         |       |      |      |
| 58 |  |                   |              |         |       |      |      |
| 59 |  |                   |              |         |       |      |      |
| 60 |  |                   |              |         |       |      |      |

|                      |              |         |      |      |     |
|----------------------|--------------|---------|------|------|-----|
|                      | <b>25-29</b> | 0.00139 | 403  | 245  | 70  |
|                      | <b>30-34</b> | 0.00145 | 363  | 234  | 95  |
|                      | <b>35-39</b> | 0.00151 | 271  | 262  | 129 |
|                      | <b>40-44</b> | 0.00333 | 216  | 278  | 106 |
|                      | <b>45-49</b> | 0.00437 | 161  | 166  | 131 |
|                      | <b>50-54</b> | 0.00797 | 71   | 136  | 43  |
|                      | <b>55-59</b> | 0.01266 | 87   | 100  | 50  |
| <b>Department 95</b> | <b>0-4</b>   | 0.00299 | 5634 | 1438 | 293 |
|                      | <b>5-9</b>   | 0.00041 | 6132 | 1120 | 147 |
|                      | <b>10-14</b> | 0.00013 | 6800 | 1094 | 78  |
|                      | <b>15-19</b> | 0.00065 | 5108 | 924  | 109 |
|                      | <b>20-24</b> | 0.00296 | 2547 | 725  | 110 |
|                      | <b>25-29</b> | 0.00424 | 1889 | 826  | 118 |
|                      | <b>30-34</b> | 0.00303 | 1248 | 1248 | 471 |
|                      | <b>35-39</b> | 0.00339 | 1230 | 1062 | 362 |
|                      | <b>40-44</b> | 0.00437 | 1333 | 1151 | 262 |
|                      | <b>45-49</b> | 0.00423 | 742  | 813  | 336 |
|                      | <b>50-54</b> | 0.00466 | 526  | 780  | 195 |
|                      | <b>55-59</b> | 0.00302 | 409  | 389  | 195 |
| <b>Department 97</b> | <b>0-4</b>   | 0.00092 | 1671 | 427  | 87  |
|                      | <b>5-9</b>   | 0.00100 | 1659 | 303  | 40  |
|                      | <b>10-14</b> | 0.00050 | 1697 | 273  | 20  |
|                      | <b>15-19</b> | 0.00000 | 1512 | 274  | 32  |
|                      | <b>20-24</b> | 0.00096 | 783  | 223  | 34  |
|                      | <b>25-29</b> | 0.00000 | 486  | 213  | 30  |
|                      | <b>30-34</b> | 0.00122 | 346  | 346  | 130 |
|                      | <b>35-39</b> | 0.00127 | 364  | 314  | 107 |
|                      | <b>40-44</b> | 0.00402 | 363  | 313  | 71  |
|                      | <b>45-49</b> | 0.00000 | 236  | 258  | 107 |
|                      | <b>50-54</b> | 0.00233 | 151  | 223  | 56  |
|                      | <b>55-59</b> | 0.00424 | 97   | 93   | 46  |
| <b>Department 99</b> | <b>0-4</b>   | 0.00330 | 2322 | 588  | 118 |
|                      | <b>5-9</b>   | 0.00033 | 2540 | 373  | 108 |
|                      | <b>10-14</b> | 0.00000 | 2525 | 466  | 151 |
|                      | <b>15-19</b> | 0.00000 | 2354 | 395  | 198 |
|                      | <b>20-24</b> | 0.00249 | 1173 | 309  | 123 |
|                      | <b>25-29</b> | 0.00260 | 665  | 349  | 141 |
|                      | <b>30-34</b> | 0.00080 | 570  | 465  | 218 |
|                      | <b>35-39</b> | 0.00170 | 389  | 470  | 317 |
|                      | <b>40-44</b> | 0.00192 | 301  | 401  | 341 |
|                      | <b>45-49</b> | 0.00113 | 256  | 370  | 256 |
|                      | <b>50-54</b> | 0.00163 | 209  | 223  | 180 |
|                      | <b>55-59</b> | 0.00691 | 71   | 273  | 91  |

†Values used in this table are for the urban population

<sup>1</sup> Initial value used in the stock of not-overweight population in 2005.

<sup>2</sup> Initial value used in the stock of overweight population in 2005.

<sup>3</sup> Initial value used in the stock of obese population in 2005.

**Table 157. Mortality rates and population size by age group at the department level for the lower socioeconomic status population (Orinoquia y Amazonia region) †**

| Departments   | Age group | Mortality rates (R) (%/year) | Not-overweight population in 2005 (Number of people)1 | Overweight population in 2005 (Number of people)2 | Obese population in 2005 (Number of people)3 |
|---------------|-----------|------------------------------|-------------------------------------------------------|---------------------------------------------------|----------------------------------------------|
| Department 81 | 0-4       | 0.00364                      | 4952                                                  | 1679                                              | 0                                            |
|               | 5-9       | 0.00035                      | 5142                                                  | 506                                               | 84                                           |
|               | 10-14     | 0.00038                      | 4220                                                  | 730                                               | 81                                           |
|               | 15-19     | 0.00192                      | 3451                                                  | 722                                               | 0                                            |
|               | 20-24     | 0.00369                      | 3618                                                  | 517                                               | 443                                          |
|               | 25-29     | 0.00263                      | 1792                                                  | 640                                               | 320                                          |
|               | 30-34     | 0.00211                      | 1438                                                  | 822                                               | 274                                          |
|               | 35-39     | 0.00198                      | 1128                                                  | 531                                               | 531                                          |
|               | 40-44     | 0.00268                      | 778                                                   | 1197                                              | 299                                          |
|               | 45-49     | 0.00276                      | 620                                                   | 310                                               | 310                                          |
|               | 50-54     | 0.00547                      | 237                                                   | 594                                               | 356                                          |
| Department 85 | 0-4       | 0.00325                      | 6149                                                  | 1631                                              | 125                                          |
|               | 5-9       | 0.00026                      | 5482                                                  | 281                                               | 0                                            |
|               | 10-14     | 0.00047                      | 4692                                                  | 757                                               | 0                                            |
|               | 15-19     | 0.00114                      | 4739                                                  | 1053                                              | 263                                          |
|               | 20-24     | 0.00246                      | 4327                                                  | 1154                                              | 288                                          |
|               | 25-29     | 0.00259                      | 3321                                                  | 586                                               | 391                                          |
|               | 30-34     | 0.00271                      | 2059                                                  | 1373                                              | 549                                          |
|               | 35-39     | 0.00228                      | 1252                                                  | 1530                                              | 417                                          |
|               | 40-44     | 0.00230                      | 1083                                                  | 1354                                              | 541                                          |
|               | 45-49     | 0.00254                      | 614                                                   | 614                                               | 0                                            |
|               | 50-54     | 0.00430                      | 555                                                   | 666                                               | 444                                          |
| Department 86 | 0-4       | 0.00300                      | 5468                                                  | 1157                                              | 315                                          |
|               | 5-9       | 0.00024                      | 4277                                                  | 1069                                              | 292                                          |
|               | 10-14     | 0.00012                      | 4268                                                  | 695                                               | 397                                          |
|               | 15-19     | 0.00175                      | 3668                                                  | 828                                               | 828                                          |
|               | 20-24     | 0.00407                      | 3144                                                  | 476                                               | 667                                          |
|               | 25-29     | 0.00274                      | 1934                                                  | 1116                                              | 223                                          |
|               | 30-34     | 0.00449                      | 1125                                                  | 1258                                              | 199                                          |
|               | 35-39     | 0.00185                      | 1163                                                  | 1074                                              | 358                                          |
|               | 40-44     | 0.00284                      | 735                                                   | 1102                                              | 367                                          |
|               | 45-49     | 0.00373                      | 476                                                   | 544                                               | 272                                          |
|               | 50-54     | 0.00636                      | 423                                                   | 593                                               | 254                                          |
| Department 91 | 0-4       | 0.01074                      | 909                                                   | 227                                               | 48                                           |
|               | 5-9       | 0.00087                      | 993                                                   | 105                                               | 66                                           |
|               | 10-14     | 0.00080                      | 992                                                   | 160                                               | 50                                           |
|               | 15-19     | 0.00107                      | 1171                                                  | 138                                               | 25                                           |

|  |                      |              |         |      |     |     |
|--|----------------------|--------------|---------|------|-----|-----|
|  |                      | <b>20-24</b> | 0.00129 | 578  | 122 | 39  |
|  |                      | <b>25-29</b> | 0.00428 | 280  | 126 | 53  |
|  |                      | <b>30-34</b> | 0.00412 | 247  | 151 | 71  |
|  |                      | <b>35-39</b> | 0.00183 | 247  | 171 | 71  |
|  |                      | <b>40-44</b> | 0.00280 | 191  | 170 | 86  |
|  |                      | <b>45-49</b> | 0.00286 | 95   | 96  | 51  |
|  |                      | <b>50-54</b> | 0.00626 | 90   | 86  | 63  |
|  |                      | <b>55-59</b> | 0.00954 | 47   | 52  | 25  |
|  | <b>Department 94</b> | <b>0-4</b>   | 0.00661 | 444  | 111 | 23  |
|  |                      | <b>5-9</b>   | 0.00182 | 472  | 50  | 31  |
|  |                      | <b>10-14</b> | 0.00000 | 450  | 72  | 23  |
|  |                      | <b>15-19</b> | 0.00073 | 430  | 51  | 9   |
|  |                      | <b>20-24</b> | 0.00531 | 187  | 39  | 13  |
|  |                      | <b>25-29</b> | 0.00139 | 123  | 55  | 23  |
|  |                      | <b>30-34</b> | 0.00145 | 100  | 61  | 29  |
|  |                      | <b>35-39</b> | 0.00151 | 100  | 69  | 29  |
|  |                      | <b>40-44</b> | 0.00333 | 80   | 71  | 36  |
|  |                      | <b>45-49</b> | 0.00437 | 41   | 42  | 22  |
|  |                      | <b>50-54</b> | 0.00797 | 28   | 27  | 20  |
|  |                      | <b>55-59</b> | 0.01266 | 21   | 24  | 11  |
|  | <b>Department 95</b> | <b>0-4</b>   | 0.00299 | 2399 | 600 | 127 |
|  |                      | <b>5-9</b>   | 0.00041 | 2124 | 224 | 142 |
|  |                      | <b>10-14</b> | 0.00013 | 2103 | 338 | 106 |
|  |                      | <b>15-19</b> | 0.00065 | 1933 | 227 | 42  |
|  |                      | <b>20-24</b> | 0.00296 | 840  | 177 | 57  |
|  |                      | <b>25-29</b> | 0.00424 | 485  | 218 | 92  |
|  |                      | <b>30-34</b> | 0.00303 | 430  | 264 | 124 |
|  |                      | <b>35-39</b> | 0.00339 | 402  | 278 | 115 |
|  |                      | <b>40-44</b> | 0.00437 | 368  | 326 | 165 |
|  |                      | <b>45-49</b> | 0.00423 | 171  | 172 | 91  |
|  |                      | <b>50-54</b> | 0.00466 | 169  | 162 | 118 |
|  |                      | <b>55-59</b> | 0.00302 | 89   | 99  | 48  |
|  | <b>Department 97</b> | <b>0-4</b>   | 0.00092 | 1584 | 392 | 87  |
|  |                      | <b>5-9</b>   | 0.00100 | 1523 | 279 | 32  |
|  |                      | <b>10-14</b> | 0.00050 | 1522 | 228 | 13  |
|  |                      | <b>15-19</b> | 0.00000 | 1335 | 217 | 32  |
|  |                      | <b>20-24</b> | 0.00096 | 702  | 189 | 27  |
|  |                      | <b>25-29</b> | 0.00000 | 371  | 170 | 30  |
|  |                      | <b>30-34</b> | 0.00122 | 287  | 248 | 104 |
|  |                      | <b>35-39</b> | 0.00127 | 307  | 264 | 93  |
|  |                      | <b>40-44</b> | 0.00402 | 297  | 247 | 49  |
|  |                      | <b>45-49</b> | 0.00000 | 169  | 213 | 90  |
|  |                      | <b>50-54</b> | 0.00233 | 123  | 162 | 50  |
|  |                      | <b>55-59</b> | 0.00424 | 79   | 65  | 46  |
|  | <b>Department 99</b> | <b>0-4</b>   | 0.00330 | 1004 | 233 | 48  |
|  |                      | <b>5-9</b>   | 0.00033 | 871  | 113 | 32  |
|  |                      | <b>10-14</b> | 0.00000 | 830  | 138 | 36  |



|  |       |         |     |     |    |
|--|-------|---------|-----|-----|----|
|  | 15-19 | 0.00000 | 837 | 135 | 85 |
|  | 20-24 | 0.00249 | 368 | 103 | 39 |
|  | 25-29 | 0.00260 | 180 | 106 | 39 |
|  | 30-34 | 0.00080 | 160 | 132 | 53 |
|  | 35-39 | 0.00170 | 127 | 141 | 85 |
|  | 40-44 | 0.00192 | 121 | 116 | 89 |
|  | 45-49 | 0.00113 | 52  | 84  | 66 |
|  | 50-54 | 0.00163 | 67  | 64  | 52 |
|  | 55-59 | 0.00691 | 18  | 70  | 15 |

†Values used in this table are for the urban population

<sup>1</sup> Initial value used in the stock of not-overweight population in 2005 for lower SES.

<sup>2</sup> Initial value used in the stock of overweight population in 2005 for lower SES.

<sup>3</sup> Initial value used in the stock of obese population in 2005 for lower SES.

**Table 158. Mortality rates and population size by age group at the department level for the middle socioeconomic status population (Orinoquia y Amazonia region) †**

| Departments   | Age group | Mortality rates (R) (%/year) | Not-overweight population in 2005 (Number of people) <sup>1</sup> | Overweight population in 2005 (Number of people) <sup>2</sup> | Obese population in 2005 (Number of people) <sup>3</sup> |
|---------------|-----------|------------------------------|-------------------------------------------------------------------|---------------------------------------------------------------|----------------------------------------------------------|
| Department 81 | 0-4       | 0.00364                      | 5624                                                              | 1847                                                          | 84                                                       |
|               | 5-9       | 0.00035                      | 5732                                                              | 1180                                                          | 337                                                      |
|               | 10-14     | 0.00038                      | 4788                                                              | 1055                                                          | 325                                                      |
|               | 15-19     | 0.00192                      | 4414                                                              | 963                                                           | 321                                                      |
|               | 20-24     | 0.00369                      | 3618                                                              | 1108                                                          | 369                                                      |
|               | 25-29     | 0.00263                      | 2304                                                              | 1728                                                          | 576                                                      |
|               | 30-34     | 0.00211                      | 1370                                                              | 1849                                                          | 616                                                      |
|               | 35-39     | 0.00198                      | 1128                                                              | 1460                                                          | 996                                                      |
|               | 40-44     | 0.00268                      | 838                                                               | 778                                                           | 898                                                      |
|               | 45-49     | 0.00276                      | 372                                                               | 1303                                                          | 558                                                      |
|               | 50-54     | 0.00547                      | 475                                                               | 772                                                           | 297                                                      |
| Department 85 | 0-4       | 0.00325                      | 6901                                                              | 1129                                                          | 125                                                      |
|               | 5-9       | 0.00026                      | 8011                                                              | 1265                                                          | 422                                                      |
|               | 10-14     | 0.00047                      | 7114                                                              | 1060                                                          | 605                                                      |
|               | 15-19     | 0.00114                      | 5265                                                              | 1185                                                          | 132                                                      |
|               | 20-24     | 0.00246                      | 3462                                                              | 1250                                                          | 481                                                      |
|               | 25-29     | 0.00259                      | 2930                                                              | 2344                                                          | 781                                                      |
|               | 30-34     | 0.00271                      | 3569                                                              | 1098                                                          | 549                                                      |
|               | 35-39     | 0.00228                      | 1391                                                              | 2504                                                          | 417                                                      |
|               | 40-44     | 0.00230                      | 1218                                                              | 1218                                                          | 947                                                      |
|               | 45-49     | 0.00254                      | 491                                                               | 1718                                                          | 736                                                      |
|               | 50-54     | 0.00430                      | 444                                                               | 888                                                           | 666                                                      |
| Department 86 | 0-4       | 0.00946                      | 611                                                               | 489                                                           | 977                                                      |
|               | 5-9       | 0.00300                      | 3444                                                              | 718                                                           | 359                                                      |
|               | 10-14     | 0.00024                      | 3928                                                              | 542                                                           | 135                                                      |
|               |           | 0.00012                      | 3670                                                              | 988                                                           | 423                                                      |

|                      |              |         |      |      |     |
|----------------------|--------------|---------|------|------|-----|
|                      | <b>15-19</b> | 0.00175 | 2837 | 667  | 167 |
|                      | <b>20-24</b> | 0.00407 | 2324 | 1119 | 430 |
|                      | <b>25-29</b> | 0.00274 | 2298 | 933  | 431 |
|                      | <b>30-34</b> | 0.00449 | 781  | 1115 | 613 |
|                      | <b>35-39</b> | 0.00185 | 786  | 1209 | 484 |
|                      | <b>40-44</b> | 0.00284 | 660  | 806  | 513 |
|                      | <b>45-49</b> | 0.00373 | 526  | 788  | 438 |
|                      | <b>50-54</b> | 0.00636 | 191  | 429  | 477 |
|                      | <b>55-59</b> | 0.00633 | 89   | 310  | 399 |
| <b>Department 91</b> | <b>0-4</b>   | 0.01074 | 608  | 132  | 32  |
|                      | <b>5-9</b>   | 0.00087 | 853  | 82   | 16  |
|                      | <b>10-14</b> | 0.00080 | 1014 | 94   | 31  |
|                      | <b>15-19</b> | 0.00107 | 799  | 111  | 10  |
|                      | <b>20-24</b> | 0.00129 | 541  | 83   | 43  |
|                      | <b>25-29</b> | 0.00428 | 328  | 128  | 58  |
|                      | <b>30-34</b> | 0.00412 | 246  | 167  | 44  |
|                      | <b>35-39</b> | 0.00183 | 262  | 144  | 61  |
|                      | <b>40-44</b> | 0.00280 | 141  | 184  | 76  |
|                      | <b>45-49</b> | 0.00286 | 122  | 149  | 56  |
|                      | <b>50-54</b> | 0.00626 | 77   | 77   | 53  |
|                      | <b>55-59</b> | 0.00954 | 71   | 42   | 19  |
| <b>Department 94</b> | <b>0-4</b>   | 0.00661 | 297  | 64   | 16  |
|                      | <b>5-9</b>   | 0.00182 | 405  | 39   | 8   |
|                      | <b>10-14</b> | 0.00000 | 460  | 42   | 14  |
|                      | <b>15-19</b> | 0.00073 | 293  | 41   | 4   |
|                      | <b>20-24</b> | 0.00531 | 175  | 27   | 14  |
|                      | <b>25-29</b> | 0.00139 | 144  | 56   | 26  |
|                      | <b>30-34</b> | 0.00145 | 100  | 68   | 18  |
|                      | <b>35-39</b> | 0.00151 | 106  | 58   | 25  |
|                      | <b>40-44</b> | 0.00333 | 59   | 77   | 32  |
|                      | <b>45-49</b> | 0.00437 | 53   | 65   | 24  |
|                      | <b>50-54</b> | 0.00797 | 24   | 24   | 17  |
|                      | <b>55-59</b> | 0.01266 | 32   | 19   | 8   |
| <b>Department 95</b> | <b>0-4</b>   | 0.00299 | 1605 | 347  | 84  |
|                      | <b>5-9</b>   | 0.00041 | 1824 | 175  | 35  |
|                      | <b>10-14</b> | 0.00013 | 2150 | 198  | 66  |
|                      | <b>15-19</b> | 0.00065 | 1318 | 184  | 17  |
|                      | <b>20-24</b> | 0.00296 | 787  | 121  | 63  |
|                      | <b>25-29</b> | 0.00424 | 568  | 221  | 101 |
|                      | <b>30-34</b> | 0.00303 | 428  | 291  | 76  |
|                      | <b>35-39</b> | 0.00339 | 426  | 234  | 99  |
|                      | <b>40-44</b> | 0.00437 | 272  | 352  | 147 |
|                      | <b>45-49</b> | 0.00423 | 220  | 268  | 101 |
|                      | <b>50-54</b> | 0.00466 | 144  | 144  | 100 |
|                      | <b>55-59</b> | 0.00302 | 135  | 80   | 35  |
| <b>Department 97</b> | <b>0-4</b>   | 0.00092 | 52   | 26   | 0   |
|                      | <b>5-9</b>   | 0.00100 | 104  | 24   | 8   |

|                      |              |         |     |     |     |
|----------------------|--------------|---------|-----|-----|-----|
|                      | <b>10-14</b> | 0.00050 | 143 | 26  | 0   |
|                      | <b>15-19</b> | 0.00000 | 145 | 48  | 0   |
|                      | <b>20-24</b> | 0.00096 | 67  | 20  | 0   |
|                      | <b>25-29</b> | 0.00000 | 61  | 30  | 0   |
|                      | <b>30-34</b> | 0.00122 | 39  | 72  | 20  |
|                      | <b>35-39</b> | 0.00127 | 50  | 36  | 14  |
|                      | <b>40-44</b> | 0.00402 | 49  | 38  | 22  |
|                      | <b>45-49</b> | 0.00000 | 56  | 34  | 17  |
|                      | <b>50-54</b> | 0.00233 | 11  | 39  | 0   |
|                      | <b>55-59</b> | 0.00424 | 14  | 23  | 0   |
| <b>Department 99</b> | <b>0-4</b>   | 0.00330 | 615 | 172 | 49  |
|                      | <b>5-9</b>   | 0.00033 | 664 | 116 | 50  |
|                      | <b>10-14</b> | 0.00000 | 714 | 146 | 92  |
|                      | <b>15-19</b> | 0.00000 | 604 | 107 | 18  |
|                      | <b>20-24</b> | 0.00249 | 368 | 69  | 23  |
|                      | <b>25-29</b> | 0.00260 | 188 | 113 | 63  |
|                      | <b>30-34</b> | 0.00080 | 132 | 132 | 71  |
|                      | <b>35-39</b> | 0.00170 | 87  | 130 | 119 |
|                      | <b>40-44</b> | 0.00192 | 43  | 112 | 138 |
|                      | <b>45-49</b> | 0.00113 | 97  | 105 | 73  |
|                      | <b>50-54</b> | 0.00163 | 43  | 65  | 50  |
|                      | <b>55-59</b> | 0.00691 | 22  | 66  | 22  |

†Values used in this table are for the urban population

1 Initial value used in the stock of not-overweight population in 2005 for middle SES.

2 Initial value used in the stock of overweight population in 2005 for middle SES.

3 Initial value used in the stock of obese population in 2005 for middle SES.

**Table 159. Mortality rates and population size by age group at the department level for the higher socioeconomic status population (Orinoquia y Amazonia region) †**

| Departments          | Age group    | Mortality rates (R) (%/year) | Not-overweight population in 2005 (Number of people) <sup>1</sup> | Overweight population in 2005 (Number of people) <sup>2</sup> | Obese population in 2005 (Number of people) <sup>3</sup> |
|----------------------|--------------|------------------------------|-------------------------------------------------------------------|---------------------------------------------------------------|----------------------------------------------------------|
| <b>Department 81</b> | <b>0-4</b>   | 0.00364                      | 4029                                                              | 504                                                           | 252                                                      |
|                      | <b>5-9</b>   | 0.00035                      | 3203                                                              | 674                                                           | 253                                                      |
|                      | <b>10-14</b> | 0.00038                      | 3895                                                              | 406                                                           | 487                                                      |
|                      | <b>15-19</b> | 0.00192                      | 3050                                                              | 722                                                           | 401                                                      |
|                      | <b>20-24</b> | 0.00369                      | 2363                                                              | 812                                                           | 148                                                      |
|                      | <b>25-29</b> | 0.00263                      | 1920                                                              | 1152                                                          | 576                                                      |
|                      | <b>30-34</b> | 0.00211                      | 1575                                                              | 1164                                                          | 822                                                      |
|                      | <b>35-39</b> | 0.00198                      | 1128                                                              | 1460                                                          | 730                                                      |
|                      | <b>40-44</b> | 0.00268                      | 658                                                               | 1316                                                          | 1436                                                     |
|                      | <b>45-49</b> | 0.00276                      | 683                                                               | 1427                                                          | 931                                                      |
|                      | <b>50-54</b> | 0.00547                      | 416                                                               | 653                                                           | 772                                                      |
|                      | <b>55-59</b> | 0.00801                      | 143                                                               | 500                                                           | 785                                                      |
| <b>Department 85</b> | <b>0-4</b>   | 0.00325                      | 5019                                                              | 1004                                                          | 376                                                      |
|                      | <b>5-9</b>   | 0.00026                      | 6184                                                              | 984                                                           | 562                                                      |
|                      | <b>10-14</b> | 0.00047                      | 7265                                                              | 1514                                                          | 151                                                      |

|                          |              |         |      |      |      |
|--------------------------|--------------|---------|------|------|------|
|                          | <b>15-19</b> | 0.00114 | 7108 | 1185 | 132  |
|                          | <b>20-24</b> | 0.00246 | 5289 | 962  | 288  |
|                          | <b>25-29</b> | 0.00259 | 4102 | 1856 | 684  |
|                          | <b>30-34</b> | 0.00271 | 2883 | 2745 | 686  |
|                          | <b>35-39</b> | 0.00228 | 1530 | 4034 | 1391 |
|                          | <b>40-44</b> | 0.00230 | 1218 | 2166 | 2436 |
|                          | <b>45-49</b> | 0.00254 | 1473 | 2454 | 1350 |
|                          | <b>50-54</b> | 0.00430 | 777  | 2110 | 666  |
|                          | <b>55-59</b> | 0.00946 | 489  | 1466 | 733  |
| <b>Department<br/>91</b> | <b>0-4</b>   | 0.01074 | 608  | 173  | 54   |
|                          | <b>5-9</b>   | 0.00087 | 1001 | 180  | 164  |
|                          | <b>10-14</b> | 0.00080 | 967  | 343  | 109  |
|                          | <b>15-19</b> | 0.00107 | 1193 | 212  | 61   |
|                          | <b>20-24</b> | 0.00129 | 672  | 190  | 59   |
|                          | <b>25-29</b> | 0.00428 | 405  | 186  | 73   |
|                          | <b>30-34</b> | 0.00412 | 324  | 281  | 171  |
|                          | <b>35-39</b> | 0.00183 | 271  | 289  | 118  |
|                          | <b>40-44</b> | 0.00280 | 206  | 229  | 145  |
|                          | <b>45-49</b> | 0.00286 | 175  | 201  | 106  |
|                          | <b>50-54</b> | 0.00626 | 91   | 150  | 112  |
|                          | <b>55-59</b> | 0.00954 | 64   | 143  | 61   |

†Values used in this table are for the urban population

<sup>1</sup> Initial value used in the stock of not-overweight population in 2005 for higher SES.

<sup>2</sup> Initial value used in the stock of overweight population in 2005 for higher SES.

<sup>3</sup> Initial value used in the stock of obese population in 2005 for higher SES.

## References

- 1 Departamento Administrativo Nacional de Estadística. Series de población. <http://www.dane.gov.co/index.php/estadisticas-por-tema/demografia-y-poblacion/series-de-poblacion> (accessed 11 Jul 2017).

# BMJ Open

## Using a system dynamics model to study the obesity transition by socioeconomic status in Colombia at the country, regional, and department level

|                                 |                                                                                                                                                                                                                                                                                                                                                                                                                                                                                                                                                                                                                                                                                                                                                   |
|---------------------------------|---------------------------------------------------------------------------------------------------------------------------------------------------------------------------------------------------------------------------------------------------------------------------------------------------------------------------------------------------------------------------------------------------------------------------------------------------------------------------------------------------------------------------------------------------------------------------------------------------------------------------------------------------------------------------------------------------------------------------------------------------|
| Journal:                        | <i>BMJ Open</i>                                                                                                                                                                                                                                                                                                                                                                                                                                                                                                                                                                                                                                                                                                                                   |
| Manuscript ID                   | bmjopen-2019-036534.R1                                                                                                                                                                                                                                                                                                                                                                                                                                                                                                                                                                                                                                                                                                                            |
| Article Type:                   | Original research                                                                                                                                                                                                                                                                                                                                                                                                                                                                                                                                                                                                                                                                                                                                 |
| Date Submitted by the Author:   | 13-Mar-2020                                                                                                                                                                                                                                                                                                                                                                                                                                                                                                                                                                                                                                                                                                                                       |
| Complete List of Authors:       | Meisel, Jose; Universidad de Ibague, Facultad de Ingeniería<br>Ramirez, Angie; Universidad de Ibague, Facultad de Ingeniería<br>Esguerra, Valentina; Universidad de los Andes, Department of Industrial Engineering, Social and Health Complexity Center<br>Montes, Felipe; Universidad de los Andes, Department of Industrial Engineering, Social and Health Complexity Center<br>Stankov, Ivana; Drexel University, Urban Health Collaborative, Dornsife School of Public Health<br>Sarmiento, Olga ; Universidad de los Andes, Department of Public Health, School of Medicine<br>Valdivia, Juan; Universidad de Chile, Departamento de Física, Facultad de Ciencias; Centro para el Desarrollo de la Nanociencia y la Nanotecnología, CEDENNA |
| <b>Primary Subject Heading</b>: | Public health                                                                                                                                                                                                                                                                                                                                                                                                                                                                                                                                                                                                                                                                                                                                     |
| Secondary Subject Heading:      | Public health                                                                                                                                                                                                                                                                                                                                                                                                                                                                                                                                                                                                                                                                                                                                     |
| Keywords:                       | EPIDEMIOLOGY, PUBLIC HEALTH, STATISTICS & RESEARCH METHODS, NUTRITION & DIETETICS                                                                                                                                                                                                                                                                                                                                                                                                                                                                                                                                                                                                                                                                 |
|                                 |                                                                                                                                                                                                                                                                                                                                                                                                                                                                                                                                                                                                                                                                                                                                                   |

SCHOLARONE™  
Manuscripts

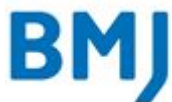

I, the Submitting Author has the right to grant and does grant on behalf of all authors of the Work (as defined in the below author licence), an exclusive licence and/or a non-exclusive licence for contributions from authors who are: i) UK Crown employees; ii) where BMJ has agreed a CC-BY licence shall apply, and/or iii) in accordance with the terms applicable for US Federal Government officers or employees acting as part of their official duties; on a worldwide, perpetual, irrevocable, royalty-free basis to BMJ Publishing Group Ltd ("BMJ") its licensees and where the relevant Journal is co-owned by BMJ to the co-owners of the Journal, to publish the Work in this journal and any other BMJ products and to exploit all rights, as set out in our [licence](#).

The Submitting Author accepts and understands that any supply made under these terms is made by BMJ to the Submitting Author unless you are acting as an employee on behalf of your employer or a postgraduate student of an affiliated institution which is paying any applicable article publishing charge ("APC") for Open Access articles. Where the Submitting Author wishes to make the Work available on an Open Access basis (and intends to pay the relevant APC), the terms of reuse of such Open Access shall be governed by a Creative Commons licence – details of these licences and which [Creative Commons](#) licence will apply to this Work are set out in our licence referred to above.

Other than as permitted in any relevant BMJ Author's Self Archiving Policies, I confirm this Work has not been accepted for publication elsewhere, is not being considered for publication elsewhere and does not duplicate material already published. I confirm all authors consent to publication of this Work and authorise the granting of this licence.

# Using a system dynamics model to study the obesity transition by socioeconomic status in Colombia at the country, regional, and department level

Jose D. Meisel<sup>1,2\*</sup>, Angie M. Ramirez<sup>3</sup>, Valentina Esguerra<sup>4</sup>, Felipe Montes<sup>5</sup>, Ivana Stankov<sup>6</sup>, Olga L. Sarmiento<sup>7</sup>, Juan A. Valdivia<sup>8,9</sup>

<sup>1</sup> Facultad de Ingeniería, Universidad de Ibagué, Carrera 22 Calle 67, 730001, Ibagué, Colombia. Ph: +57(8) 2760010. Fax: +57(8) 2760010. [jd.meisel28@uniandes.edu.co](mailto:jd.meisel28@uniandes.edu.co)

<sup>2</sup> Social and Health Complexity Center, Bogotá, Colombia

<sup>3</sup> Facultad de Ingeniería, Universidad de Ibagué, Carrera 22 Calle 67, 730001, Ibagué, Colombia. Ph: +57(8) 2760010. Fax: +57(8) 2760010. [angie.ramirez@unibague.edu.co](mailto:angie.ramirez@unibague.edu.co)

<sup>4</sup> Department of Industrial Engineering, Universidad de los Andes, Social and Health Complexity Center, Carrera 1 Este No. 19A-40, Bogotá, Colombia. [v.esguerra@uniandes.edu.co](mailto:v.esguerra@uniandes.edu.co)

<sup>5</sup> Department of Industrial Engineering, Universidad de los Andes, Social and Health Complexity Center, Bogotá, Colombia. Carrera 1 Este No. 19A-40, Bogotá, Colombia. [felmont@uniandes.edu.co](mailto:felmont@uniandes.edu.co)

<sup>6</sup> Urban Health Collaborative, Dornsife School of Public Health, Drexel University, 3600 Market St, 7th floor, Philadelphia, PA 19104, USA. [is379@drexel.edu](mailto:is379@drexel.edu)

<sup>7</sup> Department of Public Health, School of Medicine, Universidad de los Andes, Carrera 1 Este No. 19A-40, Bogotá, Colombia. [osarmien@uniandes.edu.co](mailto:osarmien@uniandes.edu.co)

<sup>8</sup> Departamento de Física, Facultad de Ciencias, Universidad de Chile, Las Palmeras 3425, Ñuñoa Santiago, Chile. [alejo@macul.ciencias.uchile.cl](mailto:alejo@macul.ciencias.uchile.cl)

<sup>9</sup> Centro para el Desarrollo de la Nanociencia y la Nanotecnología, CEDENNA, Santiago, Chile.

\* Corresponding author: Jose D. Meisel, Carrera 22 Calle 67, Ibagué, Colombia. Ph: +57(8) 2760010 ext. 4006. Fax: +57(8) 2760010. [jd.meisel28@uniandes.edu.co](mailto:jd.meisel28@uniandes.edu.co)

## Key words

Epidemiology, Public Health, Obesity Transition, System Dynamics Model, Complex System, System Science

## ABSTRACT

1 **Objective:** We study the obesity transition by socioeconomic status (SES), sex, and age within the  
2 Colombian urban population at the country, regional, and department level.

3 **Design:** The study is informed by cross-sectional data from the 2005 and 2010 ENSIN survey. We  
4 used these data to develop a system dynamics model that simulates the dynamics of obesity by body  
5 mass index (BMI) categories, sex, and SES at the country, regional, and department level from 2005  
6 to 2030.

7 **Participants:** The sample size of the 2005 ENSIN comprised 8,515 children younger than five years,  
8 32,009 children and adolescents aged 5–17 years, and 48,056 adults aged 18–64 years. In 2010 the  
9 corresponding numbers were 11,368, 32,524, and 64,425, respectively.

10 **Primary and secondary outcome measure:** The obesity prevalence ratio and prevalence rates for  
11 each BMI category.

12 **Results:** The results show, at the country-level, transitions from overweight to obesity were projected  
13 to increase sharply among lower SES adults, particularly among women, suggesting that these groups  
14 will undergo an obesity transition by 2030. The model projections also indicate that the regions of  
15 Colombia are in different stages of the obesity transition. In the case of women, five out of the six  
16 regions were expected to undergo an obesity transition by SES over time. For men, only one region  
17 was expected to undergo an obesity transition. However, at the department-level, trends in the burden  
18 of obesity varied.

19 **Conclusions:** We evidence that the Colombian population could be experiencing an obesity transition  
20 where the increase in the GDP could be related to shifts in the burden of obesity from higher to lower  
21 SES, especially in women. These patterns support the need for policy planning that considers SES  
22 and sex, at the national and sub-national level, as important determinants of overweight and obesity



23 among adults in Colombia.

24 **Article word count:** 4546

25 **Abstract word count:** 298

26 **Reference word count:** 1540

27 **Number of References:** 57

28 **Figures:** 5

29 **Tables:** 1

## 30 **ARTICLE SUMMARY**

### 31 **Strengths and limitations**

- 32 • To our knowledge, this is the first Systems Dynamics (SD) model to explore the obesity  
33 transition by age, sex, and socioeconomic status (SES) at the national and sub-national level.
- 34 • The SD model has the capacity to incorporate a real-world ageing population structure from  
35 an upper middle-income country to dynamically explore the relationship between gross  
36 domestic product (GDP), and overweight and obesity prevalence, by sex and SES.
- 37 • Our study focuses only on GDP per capita as the main indicator of economic development at  
38 the country, region, and department-levels. This is the only indicator we had with available  
39 data across all time points and at both the national and subnational level.
- 40 • Transference rates (TRs) between BMI categories were estimated using two data points and  
41 we assumed no variation in mortality rates across BMI categories because these data were  
42 not available.
- 43 • Our model assumes that the estimated TRs between BMI categories do not change over  
44 time.

## 45 **INTRODUCTION**

1  
2  
3 46 Obesity has become a global epidemic with at least 2.8 million deaths each year attributable  
4  
5 47 to overweight and obesity [1]. Obesity and overweight are associated with a range of non-  
6  
7 48 communicable diseases (NCDs) including cardiovascular diseases, cancer, diabetes, and chronic  
8  
9 49 respiratory diseases. These NCDs are the leading global cause of death (70% of deaths worldwide)  
10  
11 50 [2], especially in low- and middle-income countries (LMIC) [3].  
12  
13

14  
15 51 Studies of socioeconomic status (SES) and obesity have shown that LMIC are facing an  
16  
17 52 obesity transition, which sees the burden of obesity shift toward the lowest SES group, particularly  
18  
19 53 in women, as the economic development level of a country increases [4–7]. Growing evidence  
20  
21 54 suggests that several countries in Latin America and the Caribbean are experiencing an important and  
22  
23 55 rapid obesity transition [8,9](e.g. Chile [10], Brazil [11,12], Colombia [13–15], Mexico [16],  
24  
25 56 Argentina [17]). These findings have been echoed most recently by Jaacks et al. [18] who suggest  
26  
27 57 that some Latin-American countries (e.g., Mexico, Colombia, Brazil) have experienced an obesity  
28  
29 58 transition. In 1975, these countries were in a stage characterized by a higher prevalence of obesity in  
30  
31 59 women compared with men. In 2016, these countries had entered a new stage that is characterized,  
32  
33 60 mainly, by a reduction in the difference in obesity prevalence, by SES, among women.  
34  
35

36  
37 61 This paper focuses on Colombia because it has experienced significant increases in the Gross  
38  
39 62 domestic product (GDP) over the past decade (GDP increased from USD 145.181 billion in 2005 to  
40  
41 63 USD 293.482 billion [19] in 2015). Additionally, Colombia has high social inequality that allows for  
42  
43 64 the categorization of the population into differentiated socioeconomic groups. This socioeconomic  
44  
45 65 differentiation makes it especially relevant for the study of obesity transition patterns. According to  
46  
47 66 the World Bank's GINI index, Colombia is ranked the fourth most unequal country in Latin  
48  
49 67 America[20]. Moreover, there is evidence that Colombia may be undergoing an obesity transition  
50  
51 68 both at the country- and regional-level. According to the 2005 and 2010 “Encuesta Nacional de la  
52  
53 69 Situación Nutricional en Colombia” (ENSIN) survey [21,22], at the country-level there was a higher  
54  
55 70 increase in the prevalence of obesity in the lowest wealth index (WI) quintile compared to the highest  
56  
57  
58  
59  
60

1  
2  
3 71 WI quintile for children, adolescents, and adults. These patterns, however, differ importantly by  
4  
5 72 region- and department-level, but have not been evaluated. Identifying obesity transition patterns at  
6  
7 73 the national- and sub-national levels is key to developing more targeted and effective interventions.  
8  
9

10 74 Furthermore, obesity can be tackled as a complex adaptive system [23] due to the global  
11  
12 75 scope, heterogeneous patterns, wide-ranging causes and impacts, and the absence of a single solution.  
13  
14 76 Given the dynamic and complex nature of obesity, calls have been made for the use of complex  
15  
16 77 systems methods to better understand and address the public health challenges posed by the obesity  
17  
18 78 epidemic [24]. To date however, most studies focused on understanding the relationship between  
19  
20 79 economic development and obesity across the socioeconomic spectrum have applied statistical  
21  
22 80 models (regression-based approaches) [5–7]. Studies employing complex systems approaches to  
23  
24 81 understand obesity and its associated factors have used methods such as, system dynamics (SD)  
25  
26 82 [15,25–29], network analysis (NA) [30–34] and agent based modelling (ABM) [35–38]. The body of  
27  
28 83 literature applying complex system approaches to investigate the dynamics of obesity by SES and sex  
29  
30 84 on the other hand, remains limited. The only such study that has been conducted in a Latin America  
31  
32 85 country has not accounted for diversity at the sub-national-level [18,39].  
33  
34  
35

36 86 At the population-level, various SD models have been proposed to study the dynamics of  
37  
38 87 obesity, for example: the nutritional stage dynamics between body mass index (BMI) categories by  
39  
40 88 age and SES [15], the energy imbalance gap (EIG) by sex and racial subpopulations among US adults  
41  
42 89 [26], weight gain and obesity in women of reproductive age and its impact on family building [25],  
43  
44 90 the distributions of weight and SES and the transitions between these states over time in US [29], and  
45  
46 91 the effect of changes in the eating behavior of British children (aged 2 to 15 years) on weight and  
47  
48 92 obesity [27]. These studies were developed to monitor the impact of health interventions and to  
49  
50 93 evaluate different policy scenarios seeking to curb obesity prevalence.  
51  
52  
53

54 94 Although different SD models have been developed to study obesity dynamics at the  
55  
56  
57  
58  
59  
60

1  
2  
3 95 population-level, to date there has been no attempt to understand this complex system at the national-  
4  
5 96 and sub-national-level. Characterizing obesity dynamics at these levels could afford important  
6  
7 97 insights relevant to the development of targeted obesity prevention initiatives that low SES and female  
8  
9 98 gender can create ‘a double burden of intersecting disadvantages’ that have been linked not just to  
10  
11 99 higher rates of obesity (as was shown in this study) but also other health-related at different levels of  
12  
13  
14 100 government. This study seeks to bridge this gap by applying SD modelling to investigate obesity  
15  
16 101 transitions by SES, sex, and age, along with their relationship to GDP, within the Colombian urban  
17  
18 102 population at the country-, regional-, and department-level over time. Specifically, we seek to identify  
19  
20 103 in which regions and departments of Colombia the burden of obesity have shifted towards the lower  
21  
22 104 SES populations, and how these shifts relate to regional and department-level GDP.  
23  
24

## 105 **Methods**

### 106 **Model overview**

107 To analyse the obesity dynamics at the national and sub-national levels, we developed a  
108 population-level SD model and used a heuristic to estimate the transition rates (TRs) between BMI  
109 categories by age, sex, and SES using data obtained, mainly from the 2005 and 2010 ENSIN for  
110 individuals aged 0 to 64 years, which were based on a validated and calibrated model [15,40].  
111 Specifically, tests assessing the suitability of the SD model showed that the model was robust and  
112 that the simulated behaviour was consistent with the expected results for the estimated prevalence  
113 rates for each BMI category and age [15]. We estimated the TRs between BMI categories by age,  
114 sex, and SES and applied the SD model to simulate and investigate the obesity dynamics by SES  
115 within the Colombian urban population from 2005 to 2030. We only simulated the urban population  
116 because the highest SES group in rural areas is poorly represented (i.e., less than 0.05% of the  
117 population) [41].  
118  
119  
120  
121  
122  
123  
124  
125  
126  
127  
128  
129  
130  
131  
132  
133  
134  
135  
136  
137  
138  
139  
140  
141  
142  
143  
144  
145  
146  
147  
148  
149  
150  
151  
152  
153  
154  
155  
156  
157  
158  
159  
160

## 118 Data

119 The study is based on cross-sectional data obtained from the 2005 and 2010 ENSIN [21,22].  
 120 The ENSIN used a multistage, stratified, population-based cluster sampling design that included both  
 121 household and individual components. The questionnaire was administered in the home by female  
 122 interviewers equipped with computer-assisted personal interview technology. The sample for 2005  
 123 comprised 8,515 children younger than five years, 32,009 children and adolescents aged 5–17 years,  
 124 and 48,056 adults aged 18–64 years. In 2010 the corresponding numbers for the sample were 11,368,  
 125 32,524, and 64,425, respectively. All the protocols were reviewed and approved by the Profamilia  
 126 Institutional Review Board on Research Involving Human Subjects. All the data used in the model  
 127 were obtained from public sources and are fully available in S1 and S2 supplementary files. Table 1  
 128 describes the data sources used in the model.

129 **Table 1. Data sources used in the model†**

| <i>Item</i>                                                                                            | <i>Data Source</i>                                                                                                                                            |
|--------------------------------------------------------------------------------------------------------|---------------------------------------------------------------------------------------------------------------------------------------------------------------|
| <b><i>Prevalence rates by BMI category, age, and WI at country, regional, and department level</i></b> |                                                                                                                                                               |
| BMI for age and sex z-score for children and adolescents aged 0 to 17 years by WI                      | National Nutrition Survey (ENSIN), 2005 [21]                                                                                                                  |
| BMI category prevalence by age, sex, and WI for adults                                                 | National Nutrition Survey (ENSIN), 2010 [22]                                                                                                                  |
| <b><i>Population composition at country, regional, and department level</i></b>                        |                                                                                                                                                               |
| Population size by age, sex, and WI                                                                    | Colombian National Department of Statistics (DANE). Estimations and population projections for 1985–2020 [42]                                                 |
| Mortality rates by age group and sex                                                                   | DANE. Vital Statistics (2005) [43]                                                                                                                            |
| Fertility rate                                                                                         | World Data Bank. World Development Indicators (1960–2014) [44]<br><br>Projections for 2015–2030. Forecast series using the Holt-Winters no seasonal method in |

|                                                                                                                                                                                                                                                                                                                                                                               |                                                                                                                                                                                              |
|-------------------------------------------------------------------------------------------------------------------------------------------------------------------------------------------------------------------------------------------------------------------------------------------------------------------------------------------------------------------------------|----------------------------------------------------------------------------------------------------------------------------------------------------------------------------------------------|
|                                                                                                                                                                                                                                                                                                                                                                               | EViews 10 (Quantitative Micro Software, LLC)<br><br>DANE. Population series-Fertility estimations (1985-2005) y Projections (2005-2020) for Colombia departments[42].                        |
| Fraction of births by BMI category and sex                                                                                                                                                                                                                                                                                                                                    | National Nutrition Survey (ENSIN), 2005 [21]                                                                                                                                                 |
| <b><i>Classification of individuals by BMI category</i></b>                                                                                                                                                                                                                                                                                                                   |                                                                                                                                                                                              |
| Height-for-age z-score and BMI for age and sex z-score cutoff points for children and adolescents aged 0 to 17 years:<br><br>Not overweight: BMI for age and sex z-score $\leq 1$ standard deviation.<br>Overweight: BMI for age and sex z-score $> 1$ standard deviation and $\leq 2$ standard deviations.<br>Obese: BMI for age and sex z-scores $> 2$ standard deviations. | WHO child growth standards [45]<br><br>WHO child growth references [46]                                                                                                                      |
| BMI category cut-points for adults aged 18 to 64 years:<br><br>Not overweight: BMI $< 25$ kg/m <sup>2</sup><br>Overweight: BMI $\geq 25$ and $< 30$ kg/m <sup>2</sup><br>Obese: BMI $\geq 30$ kg/m <sup>2</sup>                                                                                                                                                               | WHO cut-off points [47]                                                                                                                                                                      |
| <b><i>SES indicator</i></b>                                                                                                                                                                                                                                                                                                                                                   |                                                                                                                                                                                              |
| Wealth index quintile                                                                                                                                                                                                                                                                                                                                                         | National Nutrition Survey (ENSIN), 2005 [21]<br><br>National Nutrition Survey (ENSIN), 2010 [22]                                                                                             |
| <b><i>Economic development level indicator</i></b>                                                                                                                                                                                                                                                                                                                            |                                                                                                                                                                                              |
| GDP per capita at regional and department level                                                                                                                                                                                                                                                                                                                               | DANE. Gross domestic product per capita [48]<br><br>Projections for 2017–2030. Forecast series using the double exponential smoothing method in EViews 10 (Quantitative Micro Software, LLC) |

130 †DHS = Demographic and Health Surveys; DANE = Colombian National Department of Statistics

131 (for the Spanish acronym); WHO = World Health Organization; BMI = body mass index; WI = wealth

132 index.

## 133 **Patient and Public Involvement statement**

134           Due to the very technical methods required to do the data analysis, patients or the public were  
135 not involved in the design or dissemination plans of our research.

## 136 **Model to assess the obesity dynamics**

137           We used a population-level SD model to assess the obesity dynamics by SES at the national-  
138 and sub-national levels. The model is characterised by ageing chains, which are robust structures  
139 commonly used in SD models to understand the evolution of ageing in a population. They are  
140 especially important when population data are sparse. Our population-level SD model includes ageing  
141 chains for three BMI categories (*not overweight*, *overweight*, and *obese*); in which the population  
142 aged 0-59 years was divided into age groups of 5 years. People in the 60 to 64 age group are not  
143 represented in the SD model. This is because 2010 prevalence rates by BMI categories for the age  
144 group 65 to 69, which are required for a reliable estimate of the TRs for this age group, are  
145 unavailable. Individuals were classified into the three BMI categories based on WHO standards and  
146 references (Table 1) [45–47]. Additionally, in the SD model structure we included births and deaths  
147 (the mortality rates differed among the age groups and sex) for each cohort [40]. Given our interest  
148 in investigating the obesity dynamics by SES, we assumed the same mortality rate for each BMI  
149 category in each age group. The net migration rate (NMR) is another variable that could be included  
150 in an ageing chain structure. At the country-level, NMR ranges from -0.23% to -2.65% for the  
151 different age groups of 5 years. At the department-level, the NMR ranges from -0,18% to -1,47% for  
152 negative values and from 0,18% to 1,38% for positive values among the different age groups and  
153 departments. Nevertheless, we did not include net migration as a variable in the SD model because  
154 to date, there are no data for Colombia that relate to mortality rates or net migration patterns by BMI  
155 category [43,49].

1  
2  
3 156 To stratify the population by SES group we used the World Bank's Wealth Index (WI) [50].  
4  
5 157 It is a validated index that allows categorization of the population into socio-economic groups and  
6  
7 158 captures quality of life markers [51]. We grouped the WI quintiles into three socioeconomic groups:  
8  
9 159 the lowest and second quintiles (lowest SES group), the middle quintile (middle SES group), and the  
10  
11 160 fourth and highest quintiles (highest SES group).  
12  
13

14  
15 161 To examine the obesity transition by SES over time, we compared the lowest SES group with  
16  
17 162 the highest SES group using the simulated obesity prevalence ratio (PR), which is a measure of the  
18  
19 163 ratio of the probability, for each sex  $j$ , of being obese in the lowest SES group to the probability of  
20  
21 164 being obese in the highest SES group for individuals aged 20 to 59 years, according to the following  
22  
23 165 equation:  
24  
25

$$166 \quad PR_j(t) = \frac{\sum_{i=4}^{11} O_{ij,1}(t)}{\sum_{i=4}^{11} (N_{ij,1}(t) + W_{ij,1}(t) + O_{ij,1}(t))} \bigg/ \frac{\sum_{i=4}^{11} O_{ij,3}(t)}{\sum_{i=4}^{11} (N_{ij,3}(t) + W_{ij,3}(t) + O_{ij,3}(t))}$$

26  
27  
28  
29  
30  
31  
32  
33  
34

35 167 Where  $t$  represents the time in years of the simulation;  $N_{i,j,1}$ ,  $W_{i,j,1}$ ,  $O_{i,j,1}$  represent *not*  
36  
37 168 *overweight*, *overweight*, and *obese* individuals with the lowest SES, respectively, in age group  $i$  and  
38  
39 169 sex  $j$ , and  $N_{i,j,3}$ ,  $W_{i,j,3}$ ,  $O_{i,j,3}$  represent *not overweight*, *overweight*, and *obese* individuals of higher SES,  
40  
41 170 respectively, in age group  $i$  and sex  $j$ . A PR value greater than one indicates that the obesity prevalence  
42  
43 171 of the lowest SES group is greater than the obesity prevalence of the highest SES group. We assumed  
44  
45 172 that individuals did not change SES group membership because there are no available data from  
46  
47 173 which TRs between SES groups can be derived for individuals in Colombia at the country, regional,  
48  
49 174 or department level. Additionally, we used the GDP per capita to study the relation between the level  
50  
51 175 of economic development, and obesity by SES over time. To analyse the relation between obesity  
52  
53 176 PRs by SES and the economic development level over time, we forecasted the GDP per capita from  
54  
55  
56  
57  
58  
59  
60



1  
2  
3 177 2017 to 2030 by applying a double exponential smoothing method to GDP data from the DANE[48].

4  
5 178 The full description of the SD model is available in the S3 appendix pp. 3-5.

6  
7  
8 179 We used a similar SD model to simulate the obesity dynamics at the regional and department  
9  
10 180 level. At the regional level, we studied the obesity dynamics by SES and sex in six regions: Atlántica,  
11  
12 181 Bogotá, Central, Oriental, Orinoquía y Amazonia, and Pacífico. At the department level, we only  
13  
14 182 studied the obesity dynamics by SES in 29 of 32 departments of Colombia (a map of Colombia by  
15  
16 183 regions and departments is available in the S3 appendix pp. 8). The model could not be used to  
17  
18 184 simulate Choco, Vaupes, and Vichada departments because reliable TR estimates could not be  
19  
20 185 generated for these departments due to limitations in the ENSIN data. Similarly, data sparsity for the  
21  
22 186 Putumayo, Amazonas, Guainía, and Guaviare departments, made it impossible to estimate the TRs  
23  
24 187 for the highest SES group. Therefore, for these departments, we assessed the obesity dynamics by  
25  
26 188 SES, by comparing the lowest SES group with the middle SES group using the PR of obesity.  
27  
28 189 Additionally, the forecasts of the GDP per capita for the Arauca, Casanare, Meta, and Putumayo  
29  
30 190 departments were not used because these departments had an unstable GDP per capita growth over  
31  
32 191 time and the forecasts therefore did not have a good fit. Finally, at the department level, we did not  
33  
34 192 include sex to simulate the obesity dynamics and to estimate the TRs between BMI categories due to  
35  
36 193 limitations in the ENSIN data when we divided the population into BMI categories, sex, and SES.  
37  
38 194 The data processing was conducted using SAS 9.3 (SAS Institute Inc.) and Mathematica 11 (Wolfram  
39  
40 195 Research, Inc.), while all simulations were run on iThink 9.0.2 (ISEE Systems, Inc.).  
41  
42  
43  
44

## 45 196 **RESULTS**

### 46 47 48 197 **Obesity dynamics at country level by sex, age, and SES**

49  
50  
51 198 The results of the heuristic show that estimated TRs towards overweight ( $\tau_1$ ) and obese ( $\tau_2$ )  
52  
53 199 were larger among individuals in the lower SES group, particularly women (mean  $\tau_1 = 0.0195$  and  
54  
55 200 mean  $\tau_2 = 0.0059$ , for men; and mean  $\tau_1 = 0.0245$  and mean  $\tau_2 = 0.0125$ , for women), than among  
56  
57  
58  
59  
60

1  
2  
3 201 those in the middle (mean  $\tau_1 = 0.0159$  and mean  $\tau_2 = 0.0037$ , for men; and mean  $\tau_1 = 0.0164$  and  
4  
5 202 mean  $\tau_2 = 0.0095$ , for women), or higher SES groups (mean  $\tau_1 = 0.0143$  and mean  $\tau_2 = 0.0061$ , for  
6  
7 203 men; and mean  $\tau_1 = 0.0169$  and mean  $\tau_2 = 0.0041$ , for women) (Figures 1A, 1B, 1C, and 1D). For  
8  
9 204 boys aged 0 to 4 years, the TRs to overweight ( $\tau_1$ ) and obese ( $\tau_2$ ) were larger in the highest SES than  
10  
11 205 the other SES groups (Figures 1A and 1C). For boys aged 10 to 14, the TR from obese to overweight  
12  
13 206 ( $\tau_3$ ) and from overweight to not overweight ( $\tau_4$ ) were larger in the middle and higher SES groups  
14  
15 207 than in the lower SES group according to heuristic estimates. For girls aged 5 to 9, on the other hand,  
16  
17 208 the TR from obese to overweight ( $\tau_3$ ) were larger in the middle and higher SES groups than in the  
18  
19 209 lower SES group. For girls aged 0 to 4, the TR from overweight to not overweight ( $\tau_4$ ) were larger  
20  
21 210 in the lower SES group than the other SES groups (Figures 1E, 1F, 1G, and 1H).

22  
23  
24  
25 211 -----  
26  
27 212 Insert Figure 1 about here  
28

29 213 -----  
30  
31  
32 214 Simulation results show that children and adolescents aged 0 to 14 (both boys and girls) will  
33  
34 215 show no major changes in their BMI category distribution over time, across all SES populations.  
35  
36 216 However, the burden of obesity is shifting towards the lower SES populations, especially among  
37  
38 217 adults (Figure 2). Between 2005 and 2030, men aged 14 to 59 years are moving towards overweight  
39  
40 218 and obesity categories (Figures 2A, 2B, 2C). Specifically, the prevalence of overweight among men  
41  
42 219 aged 20 to 59 years in the lowest, middle, and highest SES groups increased from 28.5% to 49%,  
43  
44 220 34.8% to 49.1%, and 40.8% to 50.6%, respectively (Figures 2D, 2E, and 2F). Among obese men aged  
45  
46 221 20 to 59 years, the differences between SES groups were also striking with a lower, middle, and  
47  
48 222 higher SES increased from 7.9% to 13.6%, 11.9% to 14%, and 14.7% to 16.1%, respectively (Figures  
49  
50 223 2G, 2H, and 2I). In the case of women aged 14 to 59 years, they are also moving towards overweight  
51  
52 224 and obesity categories (Figures 2J, 2K, 2L). Specifically, the prevalence of overweight among women  
53  
54 225 aged 20 to 59 years in the lowest, middle, and highest SES groups increased from 32.6% to 46.8%,  
55  
56  
57  
58  
59  
60

1  
2  
3 226 34.2% to 43.8%, and 33.8% to 50.2%, respectively (Figures 2M, 2N, and 2Ñ). Among obese women  
4  
5 227 aged 20 to 59 years, the differences between SES groups were even more prominent than in men with  
6  
7 228 a lower, middle, and higher SES increased from 13.8% to 29%, 19.1% to 26.6%, and 18.3% to 19.8%,  
8  
9 229 respectively (Figures 2O, 2P, and 2Q).

10  
11  
12 230 -----  
13  
14 231 Insert Figure 2 about here

15  
16 232 -----  
17  
18  
19  
20 233 The simulated obesity prevalence ratios among urban men and women aged 20 to 59 years  
21  
22 234 (Figure 3) confirm that the burden of obesity among adults, especially women, tends to shift towards  
23  
24 235 those with lower SES. In fact, we confirmed, for both men and women, that obesity in the lower SES  
25  
26 236 population is increasing faster than obesity in higher SES populations. Despite these trends however,  
27  
28 237 for men, the burden of obesity is projected to remain greatest among individuals with higher SES, at  
29  
30 238 least up to and potentially beyond 2030.

31  
32  
33 239 -----  
34  
35 240 Insert Figure 3 about here

36  
37 241 -----  
38  
39  
40

## 41 242 **Obesity dynamics at region level by sex, age, and SES**

42  
43 243 The model projections further indicate that the regions of Colombia are in different stages of  
44  
45 244 the obesity transition (Figure 4). For men, the only region that was projected to experience an obesity  
46  
47 245 transition, was Orinoquia y Amazonia. However, the GDP per capita within this region increased  
48  
49 246 only from 2005 to 2013 (percentage increase of 124.86%), followed by a small decrease in the period  
50  
51 247 between 2014 and 2016. In the Atlántica, Pacífica, and Central regions, the PR of obesity increased  
52  
53 248 more rapidly in the lowest SES group than the highest SES group as the GDP per capita increases.  
54  
55 249 Nevertheless, according to our model, these regions were unlikely to experience an obesity transition

1  
2  
3 250 by 2030. Bogotá and Oriental regions were also not expected to undergo an obesity transition. In fact,  
4  
5 251 the model's projections indicate that these two regions would likely follow an inverted trajectory  
6  
7 252 compared to other regions in Colombia (Figure 4A). In the case of women, in five out of the six  
8  
9 253 regions (i.e., Atlántica, Oriental, Central, Pacífico and Orinoquia y Amazonía) the burden of obesity  
10  
11 254 was projected to shift towards populations with lower SES, as the GDP per capita increased. Our  
12  
13 255 model projections also suggest that these regions were likely to experience an obesity transition  
14  
15 256 (Figure 4B). While the burden of obesity was also observed to shift towards populations with lower  
16  
17 257 SES in Bogotá, women in this region were not projected to undergo an obesity transition, unlike those  
18  
19 258 in the other regions (Figure 4B).

22  
23 259 -----  
24  
25 260 Insert Figure 4 about here

26  
27 261 -----  
28  
29

## 30 262 **Obesity dynamics at department-level by SES**

31  
32  
33 263 Akin to the model projections at the regional-level, we observed that the departments of  
34  
35 264 Colombia are also at different stages of the obesity transition (Figure 5). In nine departments, we  
36  
37 265 observed that the obesity PR increased more rapidly in the lowest SES group than in the highest SES  
38  
39 266 group as the department's GDP per capita increased: Amazonas, Guanía, Cauca, Valle del Cauca,  
40  
41 267 Boyacá, Antioquia, Tolima, Caldas, and San Andres. In the departments of Santander, Atlántico,  
42  
43 268 Bolívar, Norte de Santander, Cesar, La Guajira, Magdalena and Sucre, though these departments were  
44  
45 269 unlikely to experience an obesity transition according to model estimates. Similarly, in the  
46  
47 270 departments of Arauca, Casanare, and Putumayo, the PR of obesity increased more rapidly in the  
48  
49 271 lower SES group than in highest SES group (for the period with useable GDP estimates), though no  
50  
51 272 obesity transitions were apparent during the available years. On the other hand, in departments of  
52  
53 273 Cundinamarca, Córdoba, Huila, Nariño, Quindío, Risaralda, Caquetá, and Guaviare, the obesity PR  
54  
55 274 increased more rapidly in the highest SES group than in the lowest SES group, despite increases in

1  
2  
3 275 the GDP per capita (Figure 5). Similarly, in the Meta department, the obesity PR increased more  
4  
5 276 rapidly in the higher SES group than in the lower SES group (for the period with useable GDP  
6  
7 277 estimates).

8  
9  
10 278 -----  
11  
12 279 Insert Figure 5 about here

13  
14 280 -----  
15  
16

## 17 281 **Discussion**

18  
19  
20  
21 282 The findings of this paper indicate that there exist substantial variations in the projected  
22  
23 283 burden of obesity by sex, age, and across the socioeconomic spectrum within and across the regions  
24  
25 284 and departments of Colombia. At the country-level, transitions from overweight to obesity were  
26  
27 285 projected to increase sharply among lower SES adults, particularly among women, suggesting that  
28  
29 286 these groups will undergo an obesity transition by 2030. These patterns were also observed across  
30  
31 287 most regions of Colombia where increases in GDP were predicted to shift the burden of obesity from  
32  
33 288 higher to lower SES groups, also being most evident for women. Although several regions were  
34  
35 289 projected to experience increases in GDP, men in only one region in Colombia (Orinoquia y  
36  
37 290 Amazonia) were expected to undergo an obesity transition by SES over time. At the department-level,  
38  
39 291 trends in the burden of obesity were mixed. For some departments, the burden was projected to shift  
40  
41 292 from higher to lower SES groups, with several of these departments expected to undergo an obesity  
42  
43 293 transition. However, inverse trends were observed in other departments where increases in GDP were  
44  
45 294 accompanied by more rapid increases in obesity prevalence among higher compared to lower SES  
46  
47 295 groups. These patterns support the need for policy planning that considers SES and sex, at the  
48  
49 296 national- and sub-national levels as important determinants of overweight and obesity among adults  
50  
51 297 in Colombia.  
52  
53  
54  
55  
56  
57  
58  
59  
60

1  
2  
3 298 Our overarching finding that the burden of obesity is projected to shift toward lower SES  
4  
5 299 populations, particularly among women, as GDP per capita increases, is consistent with previously  
6  
7 300 published studies focusing predominantly on country-level trends [5–7,9,18,29,52]. For example, a  
8  
9 301 systematic review published in 2004, studying associations between SES and obesity in developing  
10  
11 302 countries found that the burden of obesity shifts to lower SES groups as a country's gross national  
12  
13 303 product (GNP) increases [5]. Furthermore, our results also align with the findings of Jones-Smith et  
14  
15 304 al's study [53]. The authors observed that while overweight and obesity remained most prevalent  
16  
17 305 among higher income individuals in most countries, over time, the prevalence of obesity rose among  
18  
19 306 those with the lowest income as GDP per capita increased. Most recently, using evidence from over  
20  
21 307 30 countries, Jaacks et al. [18] illustrated the different stages of the obesity transition, demonstrating  
22  
23 308 that as the level of economic development increases, the prevalence of obesity is greater in  
24  
25 309 populations with lower SES than in the higher SES, especially in women.

26  
27  
28 310 This paper also provides unique insights into how a system can demonstrate vastly different  
29  
30 311 patterns and behavior at different levels of aggregation. For example, increases in GDP were  
31  
32 312 associated with obesity transition by SES at the country-level and across most regions of Colombia,  
33  
34 313 particularly among women. This patterning however, was not consistently observed at the  
35  
36 314 department-level where seemingly only the departments that experienced sizeable increases in  
37  
38 315 economic development, such as Amazonas, Guanía, Cauca, Valle del Cauca, Boyacá, Antioquia,  
39  
40 316 Tolima, Caldas, San Andres, Santander, Atlántico, Bolívar, Cesar, La Guajira, Magdalena, and Sucre,  
41  
42 317 were projected to undergo an obesity transition by SES, as the GDP per capita increased. These  
43  
44 318 findings are consistent with the study by Jaacks et al. [18] which suggested that variations in obesity  
45  
46 319 transitions at a subnational level may be explained by socioeconomic factors and inequalities. It is  
47  
48 320 also possible that the observed differences across country/ region and department-levels are an artifact  
49  
50 321 of our study's exclusive focus on GDP, the only indicator we had with available data across all time  
51  
52 322 points and at the national- and sub-national levels. Perhaps other indicators, such as the Human  
53  
54 323 Development Index (HDI) or education level, have a more robust relationship with the obesity

1  
2  
3 324 transition across country-, region-, and department-levels [6]. Another potential reason for the  
4  
5 325 observed differences at the department-level could relate to the fact that we were unable to model  
6  
7 326 obesity dynamics by sex, due to data sparsity. Countries in LMIC particularly Latin American  
8  
9 327 countries are very unequal and diverse [54]. As such, the heterogeneity in obesity transitions should  
10  
11 328 be taken into account in the planning of targeted interventions. This study is the first to provide  
12  
13 329 insights at the sub-national-level.

14  
15 330 The current analysis also has important policy implications. For Colombia, the results  
16  
17 331 provides patterns of transition by SES and sex that are crucial to monitor the implementation of  
18  
19 332 policies like the National Policy of Food and Nutrition Security and the obesity law (National law  
20  
21 333 1355/2009), which stipulates that schools should ensure fruit and vegetable availability, implement  
22  
23 334 food education programs, and regulate the consumption of highly caloric foods and beverages. Both  
24  
25 335 policies have intersectoral actions to control the broad spectrum of malnutrition and non-  
26  
27 336 communicable diseases in Colombia. Furthermore, in regions like Amazonia & Orinoquia and  
28  
29 337 Atlántica policies have principally been directed towards tackling undernutrition, but our results also  
30  
31 338 underscore the potential importance of programs aimed at controlling obesity transitions. In fact,  
32  
33 339 policies in Colombia should account for the double burden mainly in low income communities [55].  
34  
35 340 In addition, our results also underscore the importance of programs aimed at preventing obesity which  
36  
37 341 could include physical activity (PA) promotion, healthy eating, and tax schemes for sugar-sweetened  
38  
39 342 beverages and ultra-processed foods. In this context, PA promotion programs like the Hábitos y  
40  
41 343 Estilos de Vida Saludable (HEVS; Healthy Life Habits) program and the taxes on sugar-sweetened  
42  
43 344 beverages are key initiatives. The HEVS program, in which women are more likely to participate,  
44  
45 345 provides free community-based physical activity classes for individuals across Colombia, and has  
46  
47 346 been shown to decrease BMI, waist circumference, and hypertension [56]. Lastly, simulations of the  
48  
49 347 potential impact of a tax on sugar-sweetened beverages shows that it could reduce overweight and  
50  
51 348 obesity prevalence particularly among low SES populations [57].  
52  
53  
54  
55  
56  
57  
58  
59  
60

1  
2  
3 349 The findings of this study should be considered in light of a few limitations. First, the  
4  
5 350 accuracy of the model's predictions is limited given that the TRs between BMI categories could only  
6  
7 351 be estimated using two data points; the 2005 and 2010 ENSIN survey. Future studies should validate  
8  
9 352 model trends against survey data collected over a longer temporal window. Second, we assumed no  
10  
11 353 variation in mortality rates across BMI categories because these data were not available. To this end,  
12  
13 354 future data collection efforts should include more nuanced collection of mortality data and regular  
14  
15 355 assessments of BMI by age, sex, and wealth index at the national- and sub-national levels. Third, our  
16  
17 356 model assumes that the estimated TRs between BMI categories do not change over time. Future  
18  
19 357 extensions of the model should dynamically incorporate the impact of other factors, on temporal  
20  
21 358 changes in BMI TRs and their effects on obesity PR projections by SES. Fourth, our study focuses  
22  
23 359 on GDP per capita as the main indicator of economic development at the country, region, and  
24  
25 360 department-levels. Future studies should explore other measures, such as HDI or education level, that  
26  
27 361 may function as better indicators of social and economic development across all three spatial units.  
28  
29 362 Fifth, given the purpose of the study and aims defined for the SD model, we focus on characterize  
30  
31 363 obesity transition patterns by SES, sex, and age at different levels over time. Nevertheless, it is  
32  
33 364 important to study the effect that the intersectionality between SES and sex could generate in the  
34  
35 365 dynamics of obesity and in the health system. Particularly, it could be important to study and  
36  
37 366 characterize vulnerable population subgroups such as lower SES women who, based on the findings  
38  
39 367 of our study, are increasingly transitioning from overweight to obesity. Therefore, future studies  
40  
41 368 should focus on assess the overlapping categories of inequality that could be involved in the  
42  
43 369 relationship between BMI categories, SES, and sex. Finally, given our finding that trends in obesity  
44  
45 370 transition vary across the national and subnational level, future studies should explore whether  
46  
47 371 threshold effects in GDP could explain these observations, and whether indeed, there exist different  
48  
49 372 critical points for transitions at the country, region, and department-level.  
50  
51  
52  
53  
54 373

## 374 **Conclusion**



1  
2  
3 375 Our model suggests that increases in GDP may be associated with shifts in the burden of obesity from  
4  
5 376 higher to lower SES urban dwellers, especially lower SES women. According to the model's  
6  
7 377 projections, by 2030, these shifts could signal obesity transitions among lower SES women. These  
8  
9 378 patterns were consistently observed at the country-level and across most regions in Colombia. There  
10  
11 379 are several implications of these findings, including policy planning at different levels of government  
12  
13 380 and the potential need to target population subgroups at greatest risk of obesity transition in the  
14  
15 381 coming years.

## 18 382 **AUTHORS CONTRIBUTIONS**

20 383 All authors had substantial contributions in the article. Particularly, JDM and OLS designed the study.  
21  
22 384 JDM and VE did the analysis and interpretation of data. JDM, AMR, OLS, FM, IS and JAV led the  
23  
24 385 writing of the report. OLS, JAV, FM, IS and AMR contributed in the analysis and interpretation of  
25  
26 386 data. JDM and JAV developed the mathematical model fully described in the supplementary  
27  
28 387 appendix. OLS, IS, AMR, VE and FM reviewed the mathematical model, and JDM implemented the  
29  
30 388 model under the direction of JAV. Finally, all authors drafted sections of the report, provided critical  
31  
32 389 review of the draft, and approved the final version of the manuscript.

## 36 390 **FUNDING**

38  
39 391 This work was supported by project #19-528-ESP of the joint grant of Research Offices at the  
40  
41 392 Universidad de Los Andes and the Universidad de Ibagué. FM was funded by NIH FIC  
42  
43 393 D43TW010540, and by FAPA grant PR.3.2017.4527 of Universidad de los Andes. OLS received  
44  
45 394 funding from the Administrative Department of Science, Technology and Innovation (Colciencias  
46  
47 395 grant number 726-2016) and Vicerrectoria de Investigaciones from Universidad de los Andes. JAV  
48  
49 396 thanks Fondecyt grant 1190703 and the support of Centro para el Desarrollo de la Nanociencias y la  
50  
51 397 Nanotecnología (CEDENNA).

## 54 398 **COMPETING INTERESTS**

399 The authors declare no conflict of interest.

## 400 DATA SHARING STATEMENT

401 All data used in this study are within the paper and its Supplementary files.

## 402 References

- 403 1 Ng M, Fleming T, Robinson M, *et al.* Global, regional, and national prevalence of overweight  
404 and obesity in children and adults during 1980-2013: a systematic analysis for the Global  
405 Burden of Disease Study 2013. *The Lancet* 2018;**384**:766–81. doi:10.1016/S0140-  
406 6736(14)60460-8
- 407 2 Forouzanfar MH, Afshin A, Alexander LT, *et al.* Global, regional, and national comparative  
408 risk assessment of 79 behavioural, environmental and occupational, and metabolic risks or  
409 clusters of risks, 1990–2015: a systematic analysis for the Global Burden of Disease Study  
410 2015. *The Lancet* 2016;**388**:1659–724. doi:10.1016/S0140-6736(16)31679-8
- 411 3 World Health Organization. *Global status report on noncommunicable diseases 2014*. WHO  
412 Library Cataloguing-in-Publication Data 2014.  
413 [http://apps.who.int/iris/bitstream/handle/10665/148114/9789241564854\\_eng.pdf;jsessionid=97](http://apps.who.int/iris/bitstream/handle/10665/148114/9789241564854_eng.pdf;jsessionid=97301FB348D75630E243392FDB4F5584?sequence=1)  
414 [301FB348D75630E243392FDB4F5584?sequence=1](http://apps.who.int/iris/bitstream/handle/10665/148114/9789241564854_eng.pdf;jsessionid=97301FB348D75630E243392FDB4F5584?sequence=1)
- 415 4 Monteiro CA, Conde WL, Lu B, *et al.* Obesity and inequities in health in the developing world.  
416 *Int J Obes* 2004;**28**:1181–6. doi:10.1038/sj.ijo.0802716
- 417 5 Monteiro CA, Moura EC, Conde WL, *et al.* Socioeconomic status and obesity in adult  
418 populations of developing countries : a review. *Public Health Rev* 2004;**82**.
- 419 6 Dinsa GD, Goryakin Y, Fumagalli E, *et al.* Obesity and socioeconomic status in developing  
420 countries: A systematic review. *Obes Rev* 2012;**13**:1067–79. doi:10.1111/j.1467-  
421 789X.2012.01017.x
- 422 7 McLaren L. Socioeconomic status and obesity. *Epidemiol Rev* 2007;**29**:29–48.  
423 doi:10.1093/epirev/mxm001
- 424 8 Abarca-Gómez L, Abdeen ZA, Hamid ZA, *et al.* Worldwide trends in body-mass index,  
425 underweight, overweight, and obesity from 1975 to 2016: a pooled analysis of 2416 population-  
426 based measurement studies in 128·9 million children, adolescents, and adults. *The Lancet*  
427 2017;**390**:2627–42. doi:10.1016/S0140-6736(17)32129-3
- 428 9 Jiwani SS, Carrillo-Larco RM, Hernández-Vásquez A, *et al.* The shift of obesity burden by  
429 socioeconomic status between 1998 and 2017 in Latin America and the Caribbean: a cross-  
430 sectional series study. *Lancet Glob Health* 2019;**7**:e1644–54. doi:10.1016/S2214-  
431 109X(19)30421-8

- 1  
2  
3 432 10 Zavala JP, Leraç L, Vio F, *et al.* Actividad física y dieta saludable , percepción de peso y estrés  
4 433 en población adulta de Chile : Análisis de la encuesta de calidad de vida y salud 2006. *Arch*  
5 434 *Latinoam Nutr* 2010;**60**:319–25.
- 6  
7 435 11 Monteiro CA, Conde WL, Popkin BM. Income-specific trends in obesity in Brazil: 1975-2003.  
8 436 *Am J Public Health* 2007;**97**:1808–12. doi:10.2105/AJPH.2006.099630
- 9  
10 437 12 Schmidt MI, Duncan BB, E Silva GA, *et al.* Chronic non-communicable diseases in Brazil:  
11 438 Burden and current challenges. *The Lancet* 2011;**377**:1949–61. doi:10.1016/S0140-  
12 439 6736(11)60135-9
- 13  
14 440 13 Parra DC, Iannotti L, Gomez LF, *et al.* The nutrition transition in Colombia over a decade: a  
15 441 novel household classification system of anthropometric measures. *Arch Public Health*  
16 442 2015;**73**:12. doi:10.1186/s13690-014-0057-5
- 17  
18 443 14 Olszowy KM, Dufour DL, Bender RL, *et al.* Socioeconomic status, stature, and obesity in  
19 444 women: 20-year trends in urban Colombia. *Am J Hum Biol* 2012;**24**:602–10.  
20 445 doi:10.1002/ajhb.22280
- 21  
22 446 15 Meisel JD, Sarmiento OL, Olaya C, *et al.* Towards a novel model for studying the nutritional  
23 447 stage dynamics of the Colombian population by age and socioeconomic status. *PLoS ONE*  
24 448 2018;**13**:1–22. doi:10.1371/journal.pone.0191929
- 25  
26 449 16 Pérez-Ferrer C, McMunn A, Zaninotto P, *et al.* The nutrition transition in Mexico 1988–2016:  
27 450 the role of wealth in the social patterning of obesity by education. *Public Health Nutr*  
28 451 2018;**21**:2394–2401. doi:10.1017/S1368980018001167
- 29  
30 452 17 Tumas N, Junyent CR, Aballay LR, *et al.* Nutrition transition profiles and obesity burden in  
31 453 Argentina. *Public Health Nutr* undefined/ed;:1–11. doi:10.1017/S1368980019000429
- 32  
33 454 18 Jaacks LM, Vandevijvere S, Pan A, *et al.* The obesity transition: stages of the global epidemic.  
34 455 *Lancet Diabetes Endocrinol* 2019;**7**:231–40. doi:10.1016/S2213-8587(19)30026-9
- 35  
36 456 19 The World Bank Group. World Bank national accounts data, and OECD National Accounts  
37 457 data files. GDP (current US\$) - Colombia | Data.  
38 458 2018. <https://data.worldbank.org/indicator/NY.GDP.MKTP.CD?locations=CO> (accessed 24 Feb  
39 459 2020).
- 40  
41 460 20 The World Bank Group. GINI index (World Bank estimate) - Colombia | Data.  
42 461 2017. [https://data.worldbank.org/indicator/SI.POV.GINI?contextual=region&end=2017&locatio  
43 462 ns=CO&most\\_recent\\_value\\_desc=true&start=2017&type=shaded&view=bar](https://data.worldbank.org/indicator/SI.POV.GINI?contextual=region&end=2017&locations=CO&most_recent_value_desc=true&start=2017&type=shaded&view=bar) (accessed 24 Feb  
44 463 2020).
- 45  
46 464 21 Instituto Colombiano de Bienestar Familiar ICBF. Encuesta Nacional de la Situación  
47 465 Nutricional en Colombia ENSIN. Bogotá: : Instituto Colombiano de Bienestar Familiar ICBF  
48 466 2005.
- 49  
50 467 22 Instituto Colombiano de Bienestar Familiar ICBF. Encuesta Nacional de la Situación  
51 468 Nutricional en Colombia ENSIN. Bogotá: : Instituto Colombiano de Bienestar Familiar ICBF  
52 469 2010.
- 53  
54  
55  
56  
57  
58  
59

- 1  
2  
3 470 23 Lee BY, Bartsch SM, Mui Y, *et al.* A systems approach to obesity. *Nutr Rev* 2017;**75**:94–106.  
4 471 doi:10.1093/nutrit/nuw049  
5  
6 472 24 Mabry PL, Bures RM. Systems science for obesity-related research questions: An introduction  
7 473 to the theme issue. *Am J Public Health* 2014;**104**:1157–9. doi:10.2105/AJPH.2014.302083  
8  
9 474 25 Sabounchi NS, Hovmand PS, Osgood ND, *et al.* A novel system dynamics model of female  
10 475 obesity and fertility. *Am J Public Health* 2014;**104**:1240–6. doi:10.2105/AJPH.2014.301898  
11  
12 476 26 Fallah-Fini S, Rahmandad H, Huang TTK, *et al.* Modeling US adult obesity trends: A system  
13 477 dynamics model for estimating energy imbalance gap. *Am J Public Health* 2014;**104**:1230–9.  
14 478 doi:10.2105/AJPH.2014.301882  
15  
16 479 27 Abidin NZ, Mamat M, Dangerfield B, *et al.* Combating obesity through healthy eating  
17 480 behavior: A call for system dynamics optimization. *PLoS ONE* 2014;**9**:1–17.  
18 481 doi:10.1371/journal.pone.0114135  
19  
20 482 28 Aktaş G, Tellioğlu N, Barlas Y, *et al.* Modeling the Long Term Dynamics of Obesity As a  
21 483 Societal Epidemic. In: *The 34th International System Dynamics Conference, July 2016, Delft,*  
22 484 *Netherlands MODELING.* 2016. 1–8.  
23  
24 485 29 Chen H-J, Xue H, Liu S, *et al.* Obesity trend in the United States and economic intervention  
25 486 options to change it: A simulation study linking ecological epidemiology and system dynamics  
26 487 modeling. *Public Health* 2018;**161**:20–8. doi:https://doi.org/10.1016/j.puhe.2018.01.013  
27  
28 488 30 Fletcher A, Bonell C, Sorhaindo A. You are what your friends eat: Systematic review of social  
29 489 network analyses of young people’s eating behaviours and bodyweight. *J Epidemiol*  
30 490 *Community Health* 2011;**65**:548–55. doi:10.1136/jech.2010.113936  
31  
32 491 31 Marks J, Barnett LM, Foulkes C, *et al.* Using social network analysis to identify key child care  
33 492 center staff for obesity prevention interventions: A pilot study. *J Obes* 2013;**2013**.  
34 493 doi:10.1155/2013/919287  
35  
36 494 32 Conte KP, Groen S, Loblay V, *et al.* Dynamics behind the scale up of evidence-based obesity  
37 495 prevention: Protocol for a multi-site case study of an electronic implementation monitoring  
38 496 system in health promotion practice. *Implement Sci* 2017;**12**. doi:10.1186/s13012-017-0686-5  
39  
40 497 33 Schaefer DR, Simpkins SD. Using social network analysis to clarify the role of obesity in  
41 498 selection of adolescent friends. *Am J Public Health* 2014;**104**:1223–9.  
42 499 doi:10.2105/AJPH.2013.301768  
43  
44 500 34 Shin H-S, Valente TW, Riggs NR, *et al.* The interaction of social networks and child obesity  
45 501 prevention program effects: The pathways trial. *Obesity* 2014;**22**:1520–6.  
46 502 doi:10.1002/oby.20731  
47  
48 503 35 Hennessy E, Ornstein JT, Economos CD, *et al.* Designing an Agent-Based Model for  
49 504 Childhood Obesity Interventions: A Case Study of ChildObesity180. *Prev Chronic Dis*  
50 505 2016;**13**:E04–E04. doi:10.5888/pcd13.150414  
51  
52 506 36 Orr MG, Kaplan GA, Galea S. Neighbourhood food, physical activity, and educational  
53 507 environments and black/white disparities in obesity: A complex systems simulation analysis. *J*  
54 508 *Epidemiol Community Health* 2016;**70**:862–7. doi:10.1136/jech-2015-205621  
55  
56  
57  
58  
59  
60

- 1  
2  
3 509 37 Hammond RA, Ornstein JT. A model of social influence on body mass index. *Ann N Y Acad*  
4 510 *Sci* 2014;**1331**:34–42. doi:10.1111/nyas.12344
- 5  
6 511 38 Beheshti R, Jalalpour M, Glass TA. Comparing methods of targeting obesity interventions in  
7 512 populations: An agent-based simulation. *SSM - Popul Health* 2017;**3**:211–8.  
8 513 doi:10.1016/j.ssmph.2017.01.006
- 9  
10 514 39 Morshed AB, Kasman M, Heuberger B, *et al.* A systematic review of system dynamics and  
11 515 agent-based obesity models: Evaluating obesity as part of the global syndemic. *Obes Rev*  
12 516 2019;**20**:161–78. doi:10.1111/obr.12877
- 13  
14 517 40 Meisel JD, Sarmiento OL, Olaya C, *et al.* A system dynamics model of the nutritional stages of  
15 518 the Colombian population. *Kybernetics* 2016;**45**:554–70. doi:http://dx.doi.org/10.1108/K-01-  
16 519 2015-0010
- 17  
18 520 41 Departamento Administrativo Nacional de Estadística. Series de población 1985-2020.  
19 521 [https://www.dane.gov.co/index.php/estadisticas-por-tema/demografia-y-poblacion/series-de-](https://www.dane.gov.co/index.php/estadisticas-por-tema/demografia-y-poblacion/series-de-poblacion)  
20 522 [poblacion](https://www.dane.gov.co/index.php/estadisticas-por-tema/demografia-y-poblacion/series-de-poblacion) (accessed 24 Feb 2020).
- 21  
22 523 42 Departamento Administrativo Nacional de Estadística. Proyecciones de población.  
23 524 2011.[https://www.dane.gov.co/index.php/estadisticas-por-tema/demografia-y-](https://www.dane.gov.co/index.php/estadisticas-por-tema/demografia-y-poblacion/proyecciones-de-poblacion)  
24 525 [poblacion/proyecciones-de-poblacion](https://www.dane.gov.co/index.php/estadisticas-por-tema/demografia-y-poblacion/proyecciones-de-poblacion) (accessed 20 Aug 2019).
- 25  
26 526 43 Departamento Administrativo Nacional de Estadística. Estadísticas Vitales.  
27 527 <https://www.dane.gov.co/index.php/estadisticas-por-tema/salud/nacimientos-y-defunciones>  
28 528 (accessed 24 Feb 2020).
- 29  
30 529 44 World Data Bank. World Development Indicators | DataBank.  
31 530 2018.[https://databank.worldbank.org/reports.aspx?source=World%20Development%20Indicato-](https://databank.worldbank.org/reports.aspx?source=World%20Development%20Indicators)  
32 531 [rs](https://databank.worldbank.org/reports.aspx?source=World%20Development%20Indicators) (accessed 26 Aug 2019).
- 33  
34 532 45 World Health Organization. WHO Child Growth Standards: Length/height-for-age, weight-for-  
35 533 age, weight-for-length, weight-for-height and body mass index-for-age: Methods and  
36 534 development. Geneva: 2006.  
37 535 [http://www.who.int/childgrowth/standards/technical\\_report/en/index.html](http://www.who.int/childgrowth/standards/technical_report/en/index.html) (accessed 19 Feb  
38 536 2013).
- 39  
40 537 46 de Onis M, Onyango AW, Borghi E, *et al.* Development of a WHO growth reference for  
41 538 school-aged children and adolescents. *Bull World Health Organ* 2007;**85**:660–7.
- 42  
43 539 47 Clinical guidelines on the identification, evaluation, and treatment of overweight and obesity in  
44 540 adults: executive summary. Expert Panel on the Identification, Evaluation, and Treatment of  
45 541 Overweight in Adults. *Am J Clin Nutr* 1998;**68**:899–917.
- 46  
47 542 48 Departamento Administrativo Nacional de Estadística. Gross domestic product per capita at  
48 543 current prices, base year 2005. Bogotá: 2018.
- 49  
50 544 49 Departamento Administrativo Nacional de Estadística (DANE). Movilidad y migración.  
51 545 [https://www.dane.gov.co/index.php/estadisticas-por-tema/demografia-y-poblacion/movilidad-](https://www.dane.gov.co/index.php/estadisticas-por-tema/demografia-y-poblacion/movilidad-y-migracion)  
52 546 [y-migracion](https://www.dane.gov.co/index.php/estadisticas-por-tema/demografia-y-poblacion/movilidad-y-migracion) (accessed 17 Feb 2020).

- 1  
2  
3 547 50 Rutstein SO, Jonhson K. The DHS Wealth Index. DHS Comparative Reports no. 6. Calverton,  
4 548 MA: : ORC Macro 2004.
- 6 549 51 Fotso J-C, Kuate-Defo B. Measuring socioeconomic status in health research in developing  
7 550 countries: Should we be focusing on households, communities or both? *Soc Indic Res*  
8 551 2005;**72**:189–237. doi:10.1007/s11205-004-5579-8
- 10 552 52 Linando AY, Lee S-K. Socioeconomic, dietary, nutrition, body weight and epidemiologic  
11 553 transitions: three nations at different stage of development. *Prog Nutr* 2018;**20**:602–15.  
12 554 doi:10.23751/pn.v20i4.7274
- 14 555 53 Jones-Smith JC, Gordon-Larsen P, Siddiqi A, *et al*. Is the burden of overweight shifting to the  
15 556 poor across the globe? Time trends among women in 39 low- and middle-income countries  
16 557 (1991–2008). *Int J Obes* 2012;**36**:1114–20. doi:10.1038/ijo.2011.179
- 18 558 54 Diez Roux AV, Slesinski SC, Alazraqui M, *et al*. A Novel International Partnership for  
19 559 Actionable Evidence on Urban Health in Latin America: LAC-Urban Health and SALURBAL.  
20 560 *Glob Chall* 2019;**3**:1800013. doi:10.1002/gch2.201800013
- 22 561 55 Sarmiento OL, Parra DC, González SA, *et al*. The dual burden of malnutrition in Colombia. *Am*  
23 562 *J Clin Nutr* 2014;**100**:1628S-1635S. doi:10.3945/ajcn.114.083816
- 25 563 56 Gaffney LK, Lozano OD, Almanza A, *et al*. The Implementation of a National Physical  
26 564 Activity Intervention in Colombia. *J Phys Act Health* 2019;**16**:430–6. doi:10.1123/jpah.2018-  
27 565 0183
- 29 566 57 Vecino-Ortiz AI, Arroyo-Ariza D. A tax on sugar sweetened beverages in Colombia:  
30 567 Estimating the impact on overweight and obesity prevalence across socio economic levels. *Soc*  
31 568 *Sci Med* 2018;**209**:111–6. doi:10.1016/j.socscimed.2018.05.043

## 569 FIGURES LEGENDS

570 **Figure 1. Estimated transference rates between BMI categories by age and SES for men and**  
571 **women at country level.** (A) Not overweight to overweight ( $\tau_1$ ) for men, (B) overweight to obese  
572 ( $\tau_2$ ) for men, (C) obese to overweight ( $\tau_3$ ) for men, and (D) overweight to not overweight ( $\tau_4$ ) for  
573 men. (E) Not overweight to overweight ( $\tau_1$ ) for women, (F) overweight to obese ( $\tau_2$ ) for women, (G)  
574 obese to overweight ( $\tau_3$ ) for women, and (H) overweight to not overweight ( $\tau_4$ ) for women.

575 **Figure 2. Estimated prevalence rates by BMI category, age, sex, and SES group.** For men: (A)  
576 *Not overweight*, lower SES; (B) *not overweight*, middle SES; (C) *not overweight*, higher SES; (D)  
577 *overweight*, lower SES; (E) *overweight*, middle SES; (F) *overweight*, higher SES; (G) *obese*, lower  
578 SES; (H) *obese*, middle SES; and (I) *obese*, higher SES. For women: (J) Not overweight, lower SES;  
579 (K) not overweight, middle SES; (L) not overweight, higher SES; (M) overweight, lower SES; (N)  
580 overweight, middle SES; (Ñ) overweight, higher SES; (O) *obese*, lower SES; (P) *obese*, middle SES;  
581 and (Q) *obese*, higher SES. Blue = 2005; Green = 2010; Red = 2020; Orange = 2030.

582 **Figure 3. Obesity prevalence ratio amongst urban adults aged 20 to 59 years. A) Men. B)**  
583 **Women**

1  
2  
3 584 **Figure 4. Prevalence ratio of obesity (Lower SES vs Higher SES) amongst urban adults aged**  
4 585 **20 to 59 years vs gross domestic product (GDP) per capita at regional level.** Obesity prevalence  
5 586 ratios greater than one signal obesity transitions by SES. Bubble size based on the total GDP per  
6 587 capita for each region. We calculated the forecast of the GDP per capita from 2017 to 2030. A) Men.  
7 588 B) Women  
8

9 589 **Figure 5. Prevalence ratio of obesity (Lower SES vs Higher SES) amongst urban adults aged**  
10 590 **20 to 59 years vs gross domestic product per capita at department level.** Obesity prevalence ratios  
11 591 greater than one signal obesity transitions by SES. A) Atlántica region. B) Oriental region. C) Central  
12 592 region. D) Pacífica region. E) Orinoquia y Amazonia region. Bubble size based on the gross domestic  
13 593 product per capita. We calculated the forecast of the GNP per capita from 2017 to 2030.  
14  
15  
16  
17  
18  
19  
20  
21  
22  
23  
24  
25  
26  
27  
28  
29  
30  
31  
32  
33  
34  
35  
36  
37  
38  
39  
40  
41  
42  
43  
44  
45  
46  
47  
48  
49  
50  
51  
52  
53  
54  
55  
56  
57  
58  
59  
60

Transference rate ( $\tau_1$ )

A)

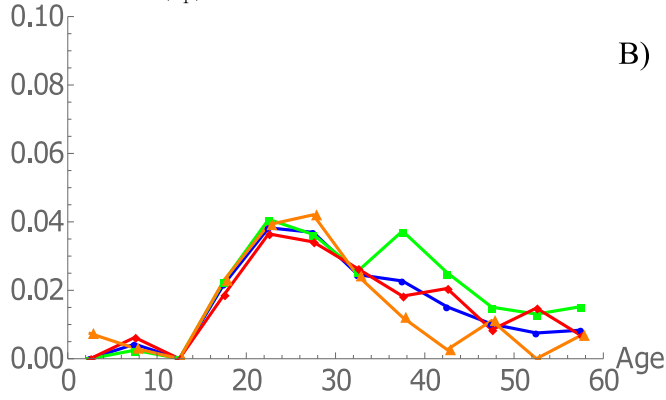

Transference rate ( $\tau_1$ )

B)

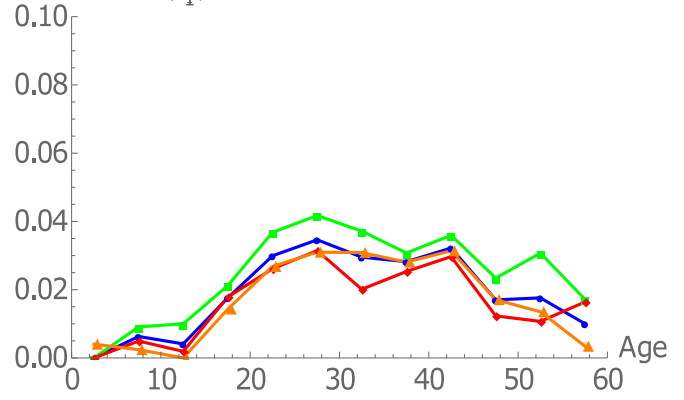

Transference rate ( $\tau_2$ )

C)

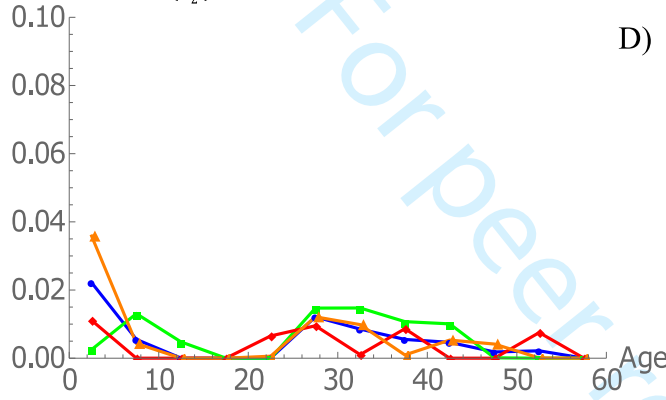

Transference rate ( $\tau_2$ )

D)

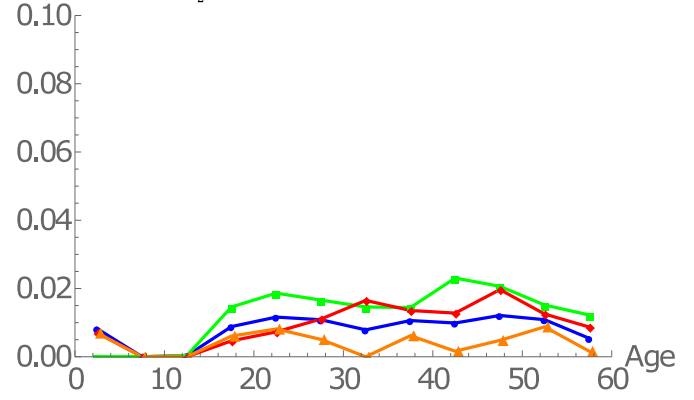

Transference rate ( $\tau_3$ )

E)

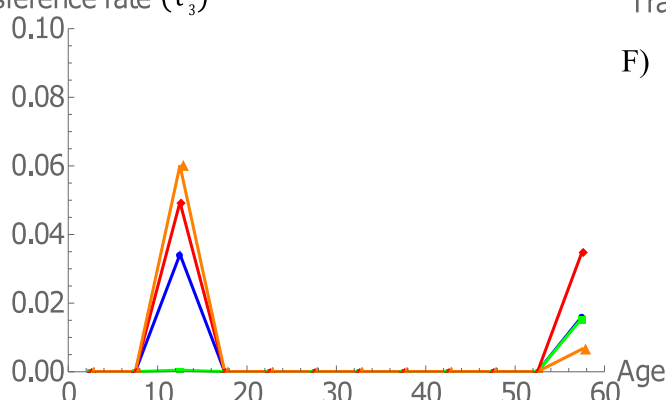

Transference rate ( $\tau_3$ )

F)

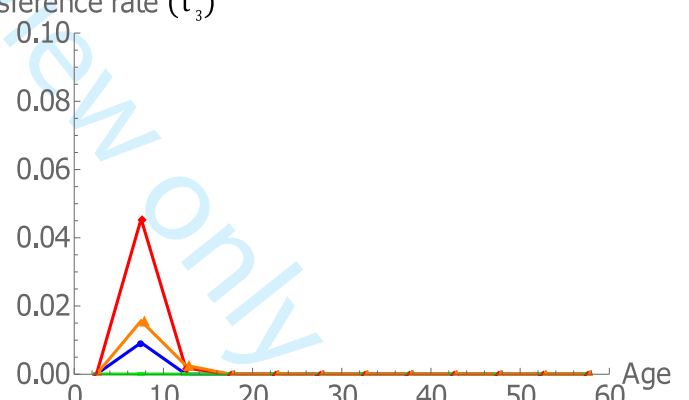

Transference rate ( $\tau_4$ )

G)

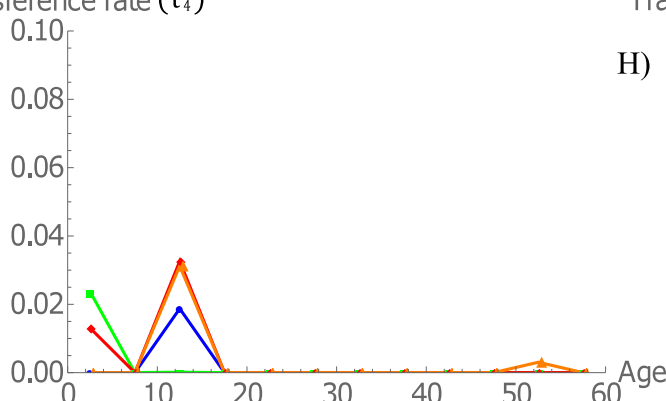

Transference rate ( $\tau_4$ )

H)

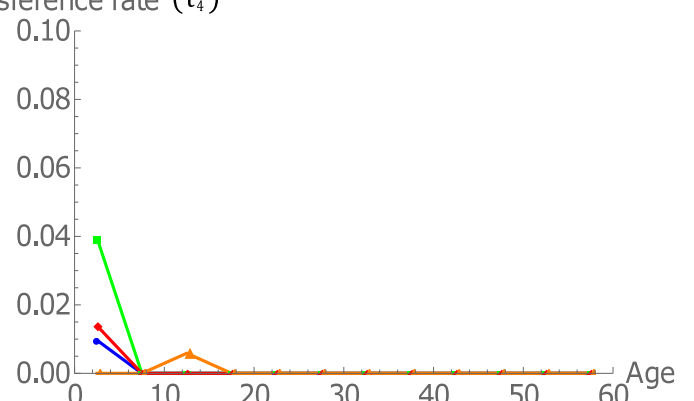

— Complete Population — Lower SES — Middle SES — Higher SES



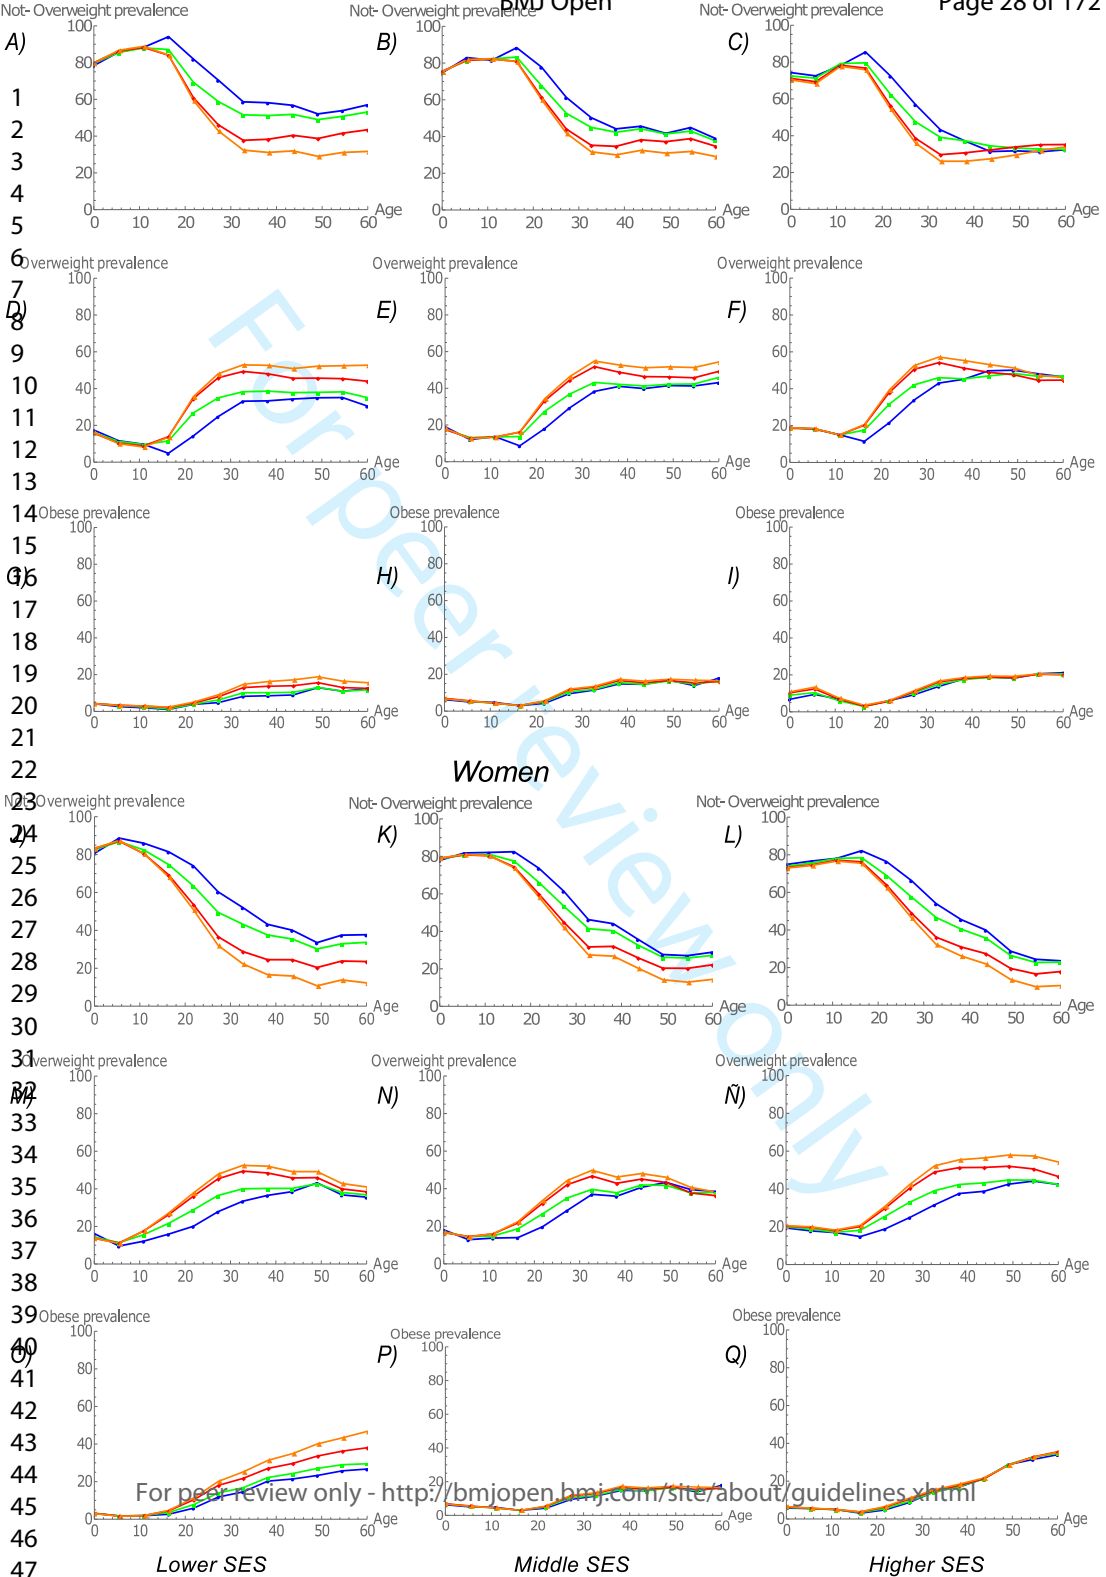

For peer review only - <http://bmjopen.bmj.com/site/about/guidelines.xhtml>

Lower SES

Middle SES

Higher SES

A)

1  
2  
3  
4  
5  
6  
7  
8  
9

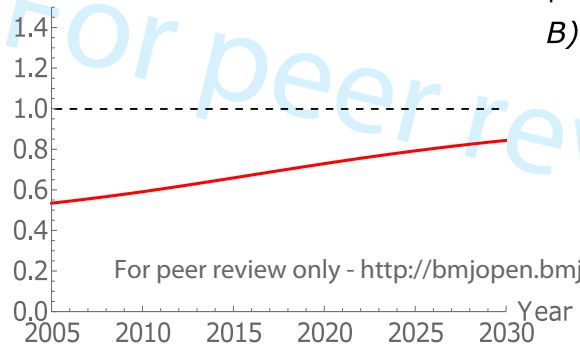

B)

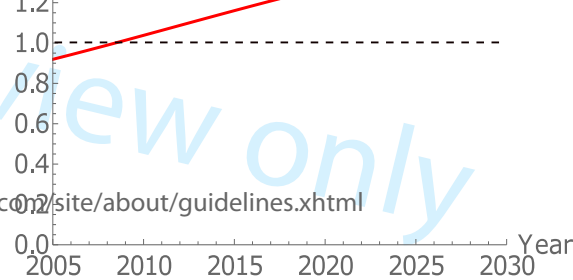

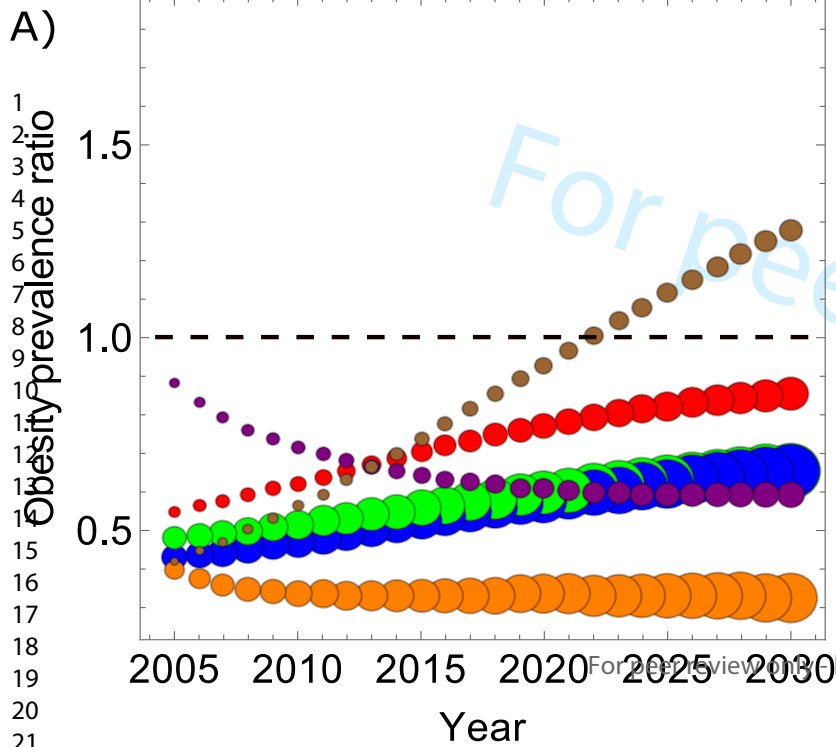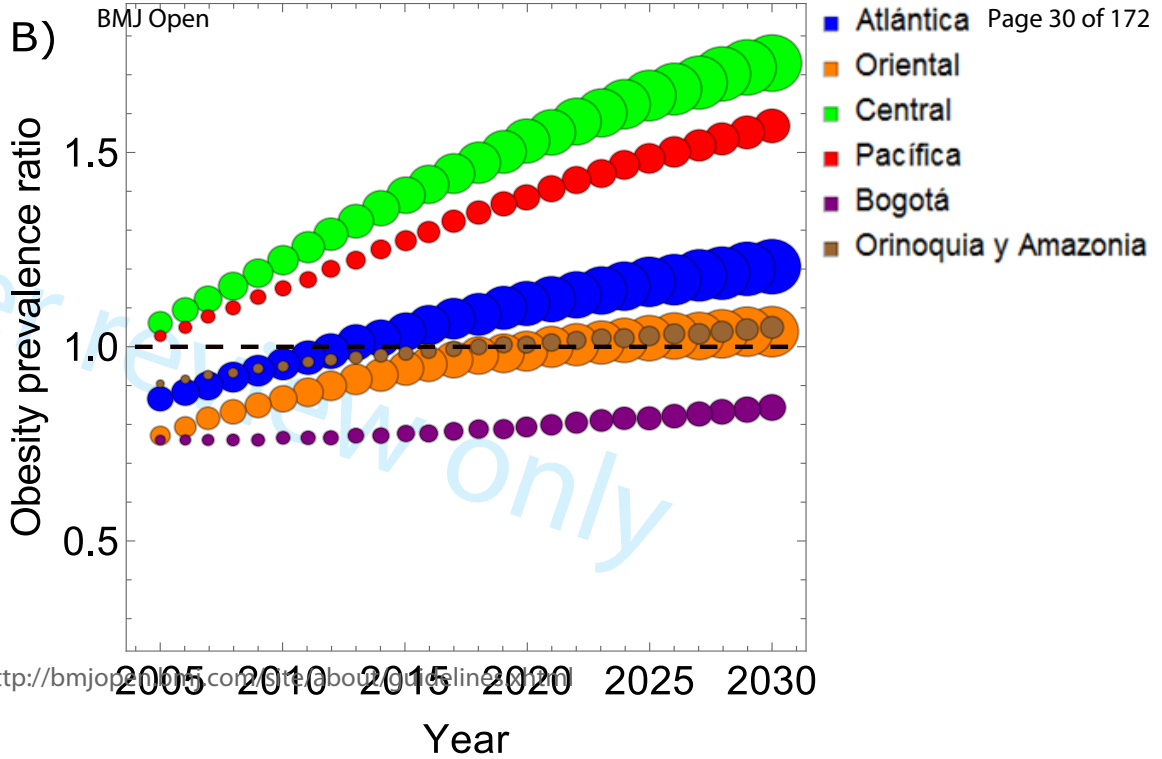

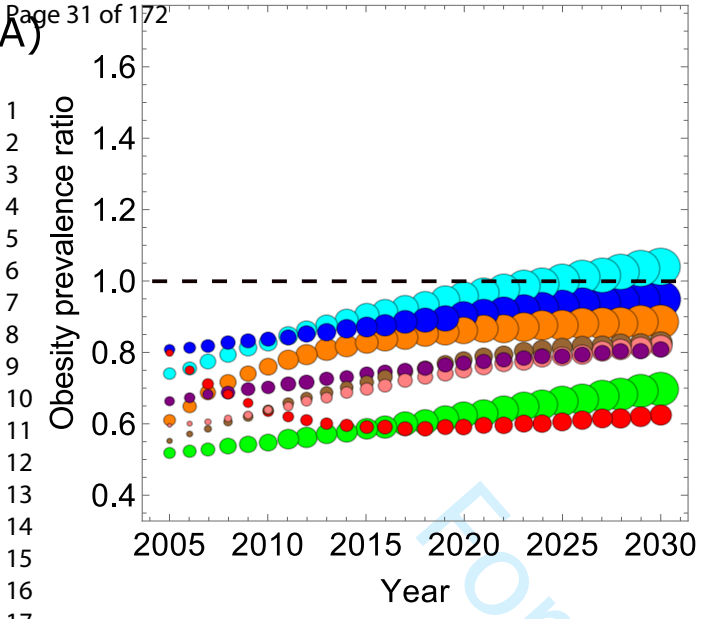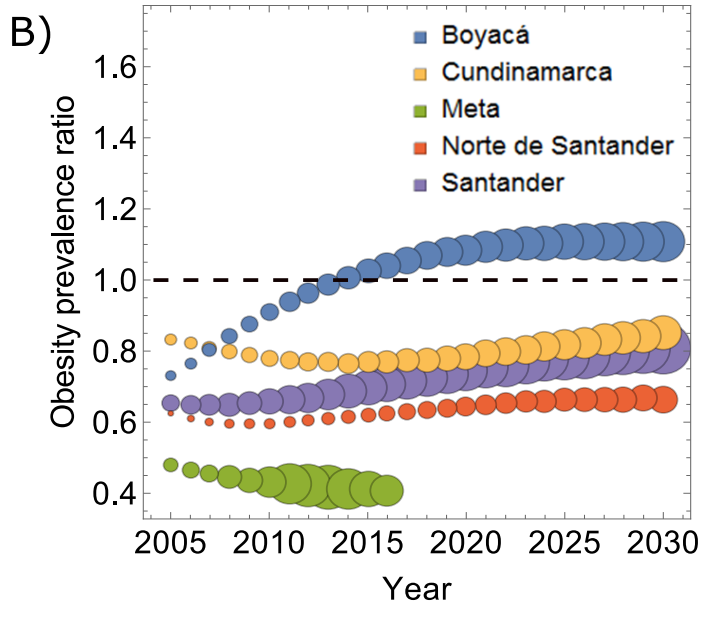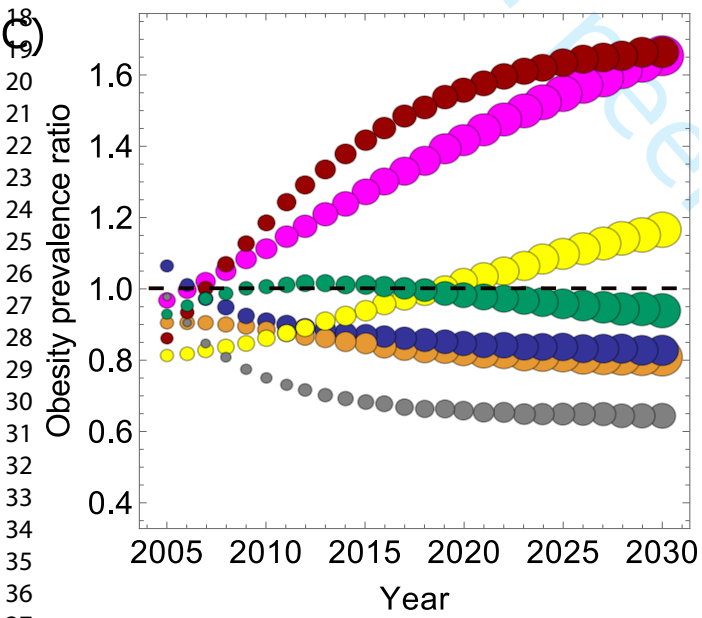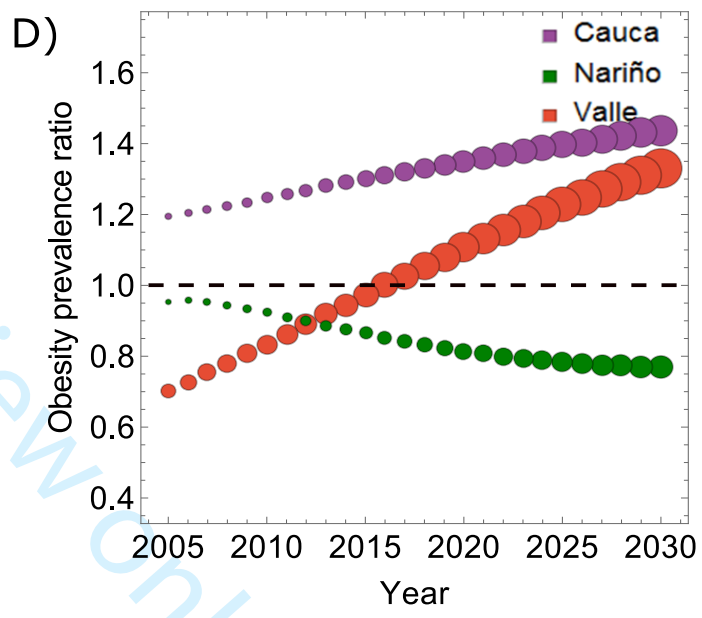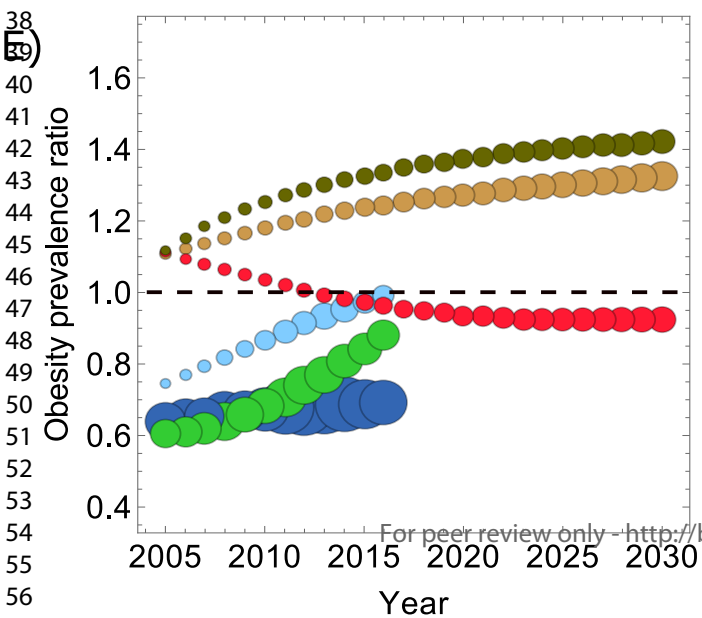

1  
2  
3 **Supplementary Information 1**  
4

5 **Supplement to: Using a system dynamics model to understand the obesity transition**  
6 **by socioeconomic status in Colombia at the country, regional, and department**  
7 **level.**  
8  
9

10  
11  
12  
13  
14  
15  
16  
17  
18  
19  
20  
21  
22  
23  
24  
25  
26  
27  
28  
29  
30  
31  
32  
33  
34  
35  
36  
37  
38  
39  
40  
41  
42  
43  
44  
45  
46  
47  
48  
49  
50  
51  
52  
53  
54  
55  
56  
57  
58  
59  
60

For peer review only

1  
2  
3  
4  
5  
6  
7  
8  
9  
10  
11  
12  
13  
14  
15  
16  
17  
18  
19  
20  
21  
22  
23  
24  
25  
26  
27  
28  
29  
30  
31  
32  
33  
34  
35  
36  
37  
38  
39  
40  
41  
42  
43  
44  
45  
46  
47  
48  
49  
50  
51  
52  
53  
54  
55  
56  
57  
58  
59  
60

**Table of contents**

**Section 1. Parameters and data used in the model at national level** ..... 3

**References** ..... 9

For peer review only

## Section 1. Parameters and data used in the model at national level

The following tables describe the data and parameters used in the two system dynamics (SD) models: SD model of the entire urban population and SD model segregated by socioeconomic status (SES) and to estimate the transference rates (TRs) by age, body mass index (BMI) category, and socioeconomic status (SES) at national level.

**Table 1. Prevalent rates of entire population by age group, sex, and body mass index category in 2005**

| Age Group | Males         |           |         | Females       |           |         |
|-----------|---------------|-----------|---------|---------------|-----------|---------|
|           | Not-Overweigh | Overweigh | Obese   | Not-Overweigh | Overweigh | Obese   |
| 0-4       | 0.76105       | 0.18357   | 0.05537 | 0.76409       | 0.18858   | 0.04733 |
| 5-9       | 0.80877       | 0.13750   | 0.05373 | 0.79520       | 0.15043   | 0.05437 |
| 10-14     | 0.83260       | 0.12485   | 0.04255 | 0.78549       | 0.17204   | 0.04248 |
| 15-19     | 0.89431       | 0.08268   | 0.02301 | 0.79172       | 0.16285   | 0.04543 |
| 20-24     | 0.76938       | 0.18236   | 0.04825 | 0.69604       | 0.22307   | 0.08089 |
| 25-29     | 0.62451       | 0.29679   | 0.07870 | 0.56640       | 0.29998   | 0.13362 |
| 30-34     | 0.50047       | 0.38605   | 0.11349 | 0.45741       | 0.36278   | 0.17981 |
| 35-39     | 0.45259       | 0.40518   | 0.14223 | 0.38965       | 0.39887   | 0.21148 |
| 40-44     | 0.42614       | 0.42564   | 0.14822 | 0.34379       | 0.40650   | 0.24971 |
| 45-49     | 0.39921       | 0.43704   | 0.16375 | 0.28923       | 0.42900   | 0.28178 |
| 50-54     | 0.41231       | 0.42621   | 0.16148 | 0.25499       | 0.41586   | 0.32915 |
| 55-59     | 0.40721       | 0.41261   | 0.18018 | 0.24122       | 0.40478   | 0.35400 |

**Table 2. Prevalent rates of lower socioeconomic status population by age group, sex, and body mass index category in 2005**

| Age Group | Males         |           |         | Females       |           |         |
|-----------|---------------|-----------|---------|---------------|-----------|---------|
|           | Not-Overweigh | Overweigh | Obese   | Not-Overweigh | Overweigh | Obese   |
| 0-4       | 0.78395       | 0.17452   | 0.04153 | 0.80653       | 0.16199   | 0.03148 |
| 5-9       | 0.85783       | 0.11623   | 0.02594 | 0.88696       | 0.09565   | 0.01739 |
| 10-14     | 0.88310       | 0.09725   | 0.01965 | 0.85980       | 0.12157   | 0.01863 |
| 15-19     | 0.94111       | 0.04837   | 0.01052 | 0.81461       | 0.15890   | 0.02648 |
| 20-24     | 0.81901       | 0.14257   | 0.03842 | 0.74058       | 0.20072   | 0.05870 |
| 25-29     | 0.70429       | 0.24785   | 0.04785 | 0.60337       | 0.27862   | 0.11801 |
| 30-34     | 0.58651       | 0.33138   | 0.08211 | 0.52023       | 0.33430   | 0.14547 |
| 35-39     | 0.58167       | 0.33333   | 0.08500 | 0.43189       | 0.36529   | 0.20283 |
| 40-44     | 0.56743       | 0.34326   | 0.08932 | 0.40071       | 0.38526   | 0.21403 |
| 45-49     | 0.52083       | 0.35000   | 0.12917 | 0.33531       | 0.43175   | 0.23294 |
| 50-54     | 0.53915       | 0.35123   | 0.10962 | 0.37478       | 0.36778   | 0.25744 |
| 55-59     | 0.57049       | 0.30492   | 0.12459 | 0.37705       | 0.35597   | 0.26698 |

**Table 3. Prevalent rates of middle socioeconomic status population by age group, sex, and body mass index category in 2005**

| Age Group | Males         |           |         | Females       |           |         |
|-----------|---------------|-----------|---------|---------------|-----------|---------|
|           | Not-Overweigh | Overweigh | Obese   | Not-Overweigh | Overweigh | Obese   |
| 0-4       | 0.74688       | 0.19067   | 0.06245 | 0.77889       | 0.18121   | 0.03990 |
| 5-9       | 0.82955       | 0.12074   | 0.04972 | 0.81805       | 0.12870   | 0.05325 |
| 10-14     | 0.81556       | 0.13689   | 0.04755 | 0.82092       | 0.13725   | 0.04183 |
| 15-19     | 0.88358       | 0.08657   | 0.02985 | 0.82485       | 0.13964   | 0.03550 |
| 20-24     | 0.77792       | 0.18020   | 0.04188 | 0.73680       | 0.19760   | 0.06560 |
| 25-29     | 0.61250       | 0.29306   | 0.09444 | 0.61466       | 0.28448   | 0.10086 |
| 30-34     | 0.50252       | 0.38319   | 0.11429 | 0.46230       | 0.37004   | 0.16766 |
| 35-39     | 0.44158       | 0.41065   | 0.14777 | 0.44085       | 0.35996   | 0.19919 |
| 40-44     | 0.45601       | 0.39856   | 0.14542 | 0.35722       | 0.40728   | 0.23549 |

| Age Group | Males         |           |         | Females       |           |         |
|-----------|---------------|-----------|---------|---------------|-----------|---------|
|           | Not-Overweigh | Overweigh | Obese   | Not-Overweigh | Overweigh | Obese   |
| 45-49     | 0.41702       | 0.41489   | 0.16809 | 0.27633       | 0.43371   | 0.28996 |
| 50-54     | 0.44875       | 0.41274   | 0.13850 | 0.27040       | 0.39520   | 0.33440 |
| 55-59     | 0.38931       | 0.43130   | 0.17939 | 0.28884       | 0.38512   | 0.32604 |

**Table 4. Prevalent rates of higher socioeconomic status population by age group, sex, and body mass index category in 2005**

| Age Group | Males         |           |         | Females       |           |         |
|-----------|---------------|-----------|---------|---------------|-----------|---------|
|           | Not-Overweigh | Overweigh | Obese   | Not-Overweigh | Overweigh | Obese   |
| 0-4       | 0.74297       | 0.18935   | 0.06768 | 0.74901       | 0.19337   | 0.05762 |
| 5-9       | 0.72519       | 0.18066   | 0.09415 | 0.76679       | 0.17827   | 0.05495 |
| 10-14     | 0.78177       | 0.15019   | 0.06804 | 0.78082       | 0.16895   | 0.05023 |
| 15-19     | 0.85472       | 0.11453   | 0.03075 | 0.82160       | 0.14789   | 0.03052 |
| 20-24     | 0.72394       | 0.21580   | 0.06026 | 0.76407       | 0.18831   | 0.04762 |
| 25-29     | 0.56919       | 0.33857   | 0.09225 | 0.66329       | 0.24911   | 0.08760 |
| 30-34     | 0.43184       | 0.43070   | 0.13746 | 0.53989       | 0.31589   | 0.14422 |
| 35-39     | 0.37037       | 0.45139   | 0.17824 | 0.45560       | 0.37591   | 0.16849 |
| 40-44     | 0.31415       | 0.49712   | 0.18872 | 0.39926       | 0.38755   | 0.21319 |
| 45-49     | 0.31790       | 0.50061   | 0.18149 | 0.28693       | 0.42549   | 0.28758 |
| 50-54     | 0.31294       | 0.48080   | 0.20626 | 0.24415       | 0.44150   | 0.31435 |
| 55-59     | 0.32413       | 0.46409   | 0.21179 | 0.23613       | 0.42381   | 0.34006 |

**Table 5. Prevalent rates of entire population by age group, sex, and body mass index category in 2010**

| Age Group | Males         |           |         | Females       |           |         |
|-----------|---------------|-----------|---------|---------------|-----------|---------|
|           | Not-Overweigh | Overweigh | Obese   | Not-Overweigh | Overweigh | Obese   |
| 0-4       | 0.73680       | 0.20456   | 0.05864 | 0.76409       | 0.18858   | 0.04733 |
| 5-9       | 0.76332       | 0.15196   | 0.08472 | 0.79520       | 0.15043   | 0.05437 |
| 10-14     | 0.77794       | 0.15256   | 0.06950 | 0.78549       | 0.17204   | 0.04248 |
| 15-19     | 0.85366       | 0.11398   | 0.03236 | 0.79172       | 0.16285   | 0.04543 |
| 20-24     | 0.73185       | 0.20473   | 0.06342 | 0.69604       | 0.22307   | 0.08089 |
| 25-29     | 0.53510       | 0.34540   | 0.11950 | 0.56640       | 0.29998   | 0.13362 |
| 30-34     | 0.44255       | 0.39099   | 0.16646 | 0.45741       | 0.36278   | 0.17981 |
| 35-39     | 0.39937       | 0.42872   | 0.17191 | 0.38965       | 0.39887   | 0.21148 |
| 40-44     | 0.36702       | 0.44594   | 0.18704 | 0.34379       | 0.40650   | 0.24971 |
| 45-49     | 0.37109       | 0.44759   | 0.18132 | 0.28923       | 0.42900   | 0.28178 |
| 50-54     | 0.36376       | 0.45504   | 0.18120 | 0.25499       | 0.41586   | 0.32915 |
| 55-59     | 0.38500       | 0.43760   | 0.17739 | 0.24122       | 0.40478   | 0.35400 |

**Table 6. Prevalent rates of lower socioeconomic status population by age group, sex, and body mass index category in 2010**

| Age Group | Males         |           |         | Females       |           |         |
|-----------|---------------|-----------|---------|---------------|-----------|---------|
|           | Not-Overweigh | Overweigh | Obese   | Not-Overweigh | Overweigh | Obese   |
| 0-4       | 0.73872       | 0.21008   | 0.05120 | 0.76813       | 0.18952   | 0.04235 |
| 5-9       | 0.81081       | 0.13745   | 0.05174 | 0.84693       | 0.11389   | 0.03918 |
| 10-14     | 0.83917       | 0.11708   | 0.04375 | 0.81566       | 0.14739   | 0.03695 |
| 15-19     | 0.88342       | 0.09347   | 0.02312 | 0.78310       | 0.17442   | 0.04248 |
| 20-24     | 0.76115       | 0.17639   | 0.06246 | 0.66899       | 0.23826   | 0.09275 |
| 25-29     | 0.56088       | 0.33523   | 0.10390 | 0.52527       | 0.31441   | 0.16032 |
| 30-34     | 0.50181       | 0.35481   | 0.14338 | 0.40909       | 0.37216   | 0.21875 |
| 35-39     | 0.46410       | 0.37565   | 0.16025 | 0.36917       | 0.39763   | 0.23320 |
| 40-44     | 0.41073       | 0.42059   | 0.16867 | 0.32658       | 0.39517   | 0.27825 |
| 45-49     | 0.45012       | 0.39549   | 0.15439 | 0.29107       | 0.39097   | 0.31796 |
| 50-54     | 0.45231       | 0.39740   | 0.15029 | 0.27503       | 0.40484   | 0.32013 |
| 55-59     | 0.47929       | 0.39842   | 0.12229 | 0.28418       | 0.38556   | 0.33026 |



**Table 7. Prevalent rates of middle socioeconomic status population by age group, sex, and body mass index category in 2010**

| Age Group | Males         |           |         | Females       |           |         |
|-----------|---------------|-----------|---------|---------------|-----------|---------|
|           | Not-Overweigh | Overweigh | Obese   | Not-Overweigh | Overweigh | Obese   |
| 0-4       | 0.74826       | 0.19360   | 0.05814 | 0.77592       | 0.18416   | 0.03992 |
| 5-9       | 0.76653       | 0.15307   | 0.08041 | 0.79742       | 0.14988   | 0.05269 |
| 10-14     | 0.78466       | 0.15682   | 0.05852 | 0.78575       | 0.17370   | 0.04055 |
| 15-19     | 0.85288       | 0.11458   | 0.03254 | 0.80732       | 0.14946   | 0.04322 |
| 20-24     | 0.74719       | 0.19654   | 0.05628 | 0.69790       | 0.22132   | 0.08079 |
| 25-29     | 0.55112       | 0.32522   | 0.12366 | 0.57692       | 0.29487   | 0.12821 |
| 30-34     | 0.44526       | 0.38421   | 0.17053 | 0.45881       | 0.36490   | 0.17629 |
| 35-39     | 0.39230       | 0.45608   | 0.15162 | 0.38689       | 0.37377   | 0.23934 |
| 40-44     | 0.37437       | 0.42839   | 0.19724 | 0.35059       | 0.38285   | 0.26655 |
| 45-49     | 0.37736       | 0.45687   | 0.16577 | 0.27349       | 0.42326   | 0.30326 |
| 50-54     | 0.38679       | 0.43962   | 0.17358 | 0.25197       | 0.38583   | 0.36220 |
| 55-59     | 0.39286       | 0.42634   | 0.18080 | 0.24806       | 0.37209   | 0.37984 |

**Table 8. Prevalent rates of higher socioeconomic status population by age group, sex, and body mass index category in 2010**

| Age Group | Males         |           |         | Females       |           |         |
|-----------|---------------|-----------|---------|---------------|-----------|---------|
|           | Not-Overweigh | Overweigh | Obese   | Not-Overweigh | Overweigh | Obese   |
| 0-4       | 0.72199       | 0.20775   | 0.07026 | 0.74656       | 0.19149   | 0.06195 |
| 5-9       | 0.69791       | 0.17015   | 0.13194 | 0.72241       | 0.20088   | 0.07671 |
| 10-14     | 0.70526       | 0.18810   | 0.10664 | 0.75157       | 0.19821   | 0.05022 |
| 15-19     | 0.82515       | 0.13360   | 0.04126 | 0.78875       | 0.16144   | 0.04981 |
| 20-24     | 0.69251       | 0.23779   | 0.06971 | 0.71908       | 0.21069   | 0.07023 |
| 25-29     | 0.49887       | 0.37040   | 0.13073 | 0.59451       | 0.29121   | 0.11429 |
| 30-34     | 0.38442       | 0.43065   | 0.18493 | 0.49567       | 0.35355   | 0.15078 |
| 35-39     | 0.34673       | 0.45514   | 0.19813 | 0.40641       | 0.41729   | 0.17630 |
| 40-44     | 0.33097       | 0.47518   | 0.19385 | 0.35115       | 0.42872   | 0.22013 |
| 45-49     | 0.30837       | 0.48018   | 0.21145 | 0.29707       | 0.45293   | 0.25000 |
| 50-54     | 0.28793       | 0.50464   | 0.20743 | 0.24590       | 0.43735   | 0.31674 |
| 55-59     | 0.32332       | 0.46755   | 0.20913 | 0.21780       | 0.42909   | 0.35311 |

**Table 9. Fraction of births by body mass index category, sex, and socioeconomic status<sup>†</sup>**

| Population Group (%/year) | Males         |           |       | Females       |           |       |
|---------------------------|---------------|-----------|-------|---------------|-----------|-------|
|                           | Not-Overweigh | Overweigh | Obese | Not-Overweigh | Overweigh | Obese |
| Lower SES                 | 82.26         | 12.60     | 5.14  | 82.26         | 12.60     | 5.14  |
| Middle SES                | 77.87         | 13.11     | 9.02  | 77.87         | 13.11     | 9.02  |
| Higher SES                | 77.90         | 16.67     | 5.43  | 77.90         | 16.67     | 5.43  |
| Complete Urban Population | 79.76         | 13.97     | 6.27  | 79.76         | 13.97     | 6.27  |

<sup>†</sup> The fractions of births by each BMI category correspond to the prevalences by BMI category of children aged 0 to 12 months

**Table 10. Man mortality rates and population size by age group without segregate by socioeconomic status<sup>†</sup>**

| Age group | Mortality rates (R) (%/year) | Not- overweight men in 2005 (Number of people) <sup>1</sup> | Overweight men in 2005 (Number of people) <sup>2</sup> | Obese men in 2005 (Number of people) <sup>3</sup> |
|-----------|------------------------------|-------------------------------------------------------------|--------------------------------------------------------|---------------------------------------------------|
| 0-4       | 0,00357                      | 1165482                                                     | 281127                                                 | 84801                                             |
| 5-9       | 0,00032                      | 1289072                                                     | 219149                                                 | 85644                                             |
| 10-14     | 0,00033                      | 1359604                                                     | 203875                                                 | 69488                                             |
| 15-19     | 0,00155                      | 1374888                                                     | 127116                                                 | 35377                                             |
| 20-24     | 0,00293                      | 1058824                                                     | 250967                                                 | 66405                                             |
| 25-29     | 0,00305                      | 771818                                                      | 366795                                                 | 97264                                             |
| 30-34     | 0,00296                      | 541980                                                      | 418070                                                 | 122902                                            |
| 35-39     | 0,00284                      | 489080                                                      | 437848                                                 | 153696                                            |
| 40-44     | 0,00310                      | 436635                                                      | 436122                                                 | 151873                                            |
| 45-49     | 0,00384                      | 337634                                                      | 369630                                                 | 138492                                            |
| 50-54     | 0,00574                      | 276901                                                      | 286235                                                 | 108449                                            |
| 55-59     | 0,00798                      | 210765                                                      | 213563                                                 | 93259                                             |

<sup>†</sup>Values used in this table are for the urban population

<sup>1</sup> Initial value used in the stock of not-overweight population in 2005.

<sup>2</sup> Initial value used in the stock of overweight population in 2005.

<sup>3</sup> Initial value used in the stock of obese population in 2005.

**Table 11. Women mortality rates and population size by age group without segregate by socioeconomic status<sup>†</sup>**

| Age group | Mortality rates (R) (%/year) | Not- overweight women in 2005 (Number of people) <sup>1</sup> | Overweight women in 2005 (Number of people) <sup>2</sup> | Obese women in 2005 (Number of people) <sup>3</sup> |
|-----------|------------------------------|---------------------------------------------------------------|----------------------------------------------------------|-----------------------------------------------------|
| 0-4       | 0,00289                      | 1126474                                                       | 278023                                                   | 69772                                               |
| 5-9       | 0,00023                      | 1227412                                                       | 232199                                                   | 83921                                               |
| 10-14     | 0,00024                      | 1244635                                                       | 272604                                                   | 67304                                               |
| 15-19     | 0,00049                      | 1219614                                                       | 250871                                                   | 69976                                               |
| 20-24     | 0,00066                      | 1026858                                                       | 329092                                                   | 119328                                              |
| 25-29     | 0,00065                      | 762616                                                        | 403902                                                   | 179915                                              |
| 30-34     | 0,00085                      | 552648                                                        | 438307                                                   | 217248                                              |
| 35-39     | 0,00107                      | 480958                                                        | 492333                                                   | 261042                                              |
| 40-44     | 0,00146                      | 403077                                                        | 476607                                                   | 292781                                              |
| 45-49     | 0,00218                      | 285037                                                        | 422785                                                   | 277697                                              |
| 50-54     | 0,00337                      | 199382                                                        | 325166                                                   | 257368                                              |
| 55-59     | 0,00523                      | 146397                                                        | 245658                                                   | 214837                                              |

<sup>†</sup>Values used in this table are for the urban population

<sup>1</sup> Initial value used in the stock of not-overweight population in 2005.

<sup>2</sup> Initial value used in the stock of overweight population in 2005.

<sup>3</sup> Initial value used in the stock of obese population in 2005.

**Table 12. Man mortality rates and population size by age group for the lower socioeconomic status population<sup>†</sup>**

| Age group | Mortality rates (R) (%/year) | Not- overweight men in 2005 (Number of people) <sup>1</sup> | Overweight men in 2005 (Number of people) <sup>2</sup> | Obese men in 2005 (Number of people) <sup>3</sup> |
|-----------|------------------------------|-------------------------------------------------------------|--------------------------------------------------------|---------------------------------------------------|
| 0-4       | 0,00357                      | 497762                                                      | 110812                                                 | 26367                                             |
| 5-9       | 0,00032                      | 562355                                                      | 76198                                                  | 17003                                             |
| 10-14     | 0,00033                      | 589337                                                      | 64899                                                  | 13111                                             |
| 15-19     | 0,00155                      | 536644                                                      | 27582                                                  | 5996                                              |
| 20-24     | 0,00293                      | 370955                                                      | 64574                                                  | 17403                                             |
| 25-29     | 0,00305                      | 277758                                                      | 97748                                                  | 18872                                             |
| 30-34     | 0,00296                      | 201479                                                      | 113836                                                 | 28207                                             |
| 35-39     | 0,00284                      | 184329                                                      | 105633                                                 | 26936                                             |

|       |         |        |        |       |
|-------|---------|--------|--------|-------|
| 40-44 | 0,00310 | 166239 | 100565 | 26167 |
| 45-49 | 0,00384 | 119390 | 80230  | 29609 |
| 50-54 | 0,00574 | 107116 | 69781  | 21779 |
| 55-59 | 0,00798 | 497762 | 110812 | 26367 |

†Values used in this table are for the urban population

<sup>1</sup> Initial value used in the stock of not-overweight population in 2005 for lower SES.

<sup>2</sup> Initial value used in the stock of overweight population in 2005 for lower SES.

<sup>3</sup> Initial value used in the stock of obese population in 2005 for lower SES.

**Table 13. Women mortality rates and population size by age group for the lower socioeconomic status population<sup>†</sup>**

| Age group | Mortality rates (R) (%/year) | Not- overweight women in 2005 (Number of people) <sup>1</sup> | Overweight women in 2005 (Number of people) <sup>2</sup> | Obese women in 2005 (Number of people) <sup>3</sup> |
|-----------|------------------------------|---------------------------------------------------------------|----------------------------------------------------------|-----------------------------------------------------|
| 0-4       | 0,00289                      | 492988                                                        | 99017                                                    | 19244                                               |
| 5-9       | 0,00023                      | 563089                                                        | 60725                                                    | 11041                                               |
| 10-14     | 0,00024                      | 556772                                                        | 78723                                                    | 12062                                               |
| 15-19     | 0,00049                      | 465440                                                        | 90792                                                    | 15132                                               |
| 20-24     | 0,00066                      | 359582                                                        | 97460                                                    | 28499                                               |
| 25-29     | 0,00065                      | 259242                                                        | 119709                                                   | 50705                                               |
| 30-34     | 0,00085                      | 199380                                                        | 128120                                                   | 55753                                               |
| 35-39     | 0,00107                      | 156332                                                        | 132225                                                   | 73418                                               |
| 40-44     | 0,00146                      | 134336                                                        | 129154                                                   | 71752                                               |
| 45-49     | 0,00218                      | 89565                                                         | 115324                                                   | 62220                                               |
| 50-54     | 0,00337                      | 86692                                                         | 85072                                                    | 59550                                               |
| 55-59     | 0,00523                      | 62876                                                         | 59361                                                    | 44521                                               |

†Values used in this table are for the urban population

<sup>1</sup> Initial value used in the stock of not-overweight population in 2005 for lower SES.

<sup>2</sup> Initial value used in the stock of overweight population in 2005 for lower SES.

<sup>3</sup> Initial value used in the stock of obese population in 2005 for lower SES.

**Table 14. Man mortality rates and population size by age group for the middle socioeconomic status population<sup>†</sup>**

| Age group | Mortality rates (R) (%/year) | Not- overweight men in 2005 (Number of people) <sup>1</sup> | Overweight men in 2005 (Number of people) <sup>2</sup> | Obese men in 2005 (Number of people) <sup>3</sup> |
|-----------|------------------------------|-------------------------------------------------------------|--------------------------------------------------------|---------------------------------------------------|
| 0-4       | 0,00357                      | 319608                                                      | 81594                                                  | 26723                                             |
| 5-9       | 0,00032                      | 367767                                                      | 53528                                                  | 22041                                             |
| 10-14     | 0,00033                      | 371039                                                      | 62277                                                  | 21633                                             |
| 15-19     | 0,00155                      | 354964                                                      | 34777                                                  | 11992                                             |
| 20-24     | 0,00293                      | 280735                                                      | 65032                                                  | 15113                                             |
| 25-29     | 0,00305                      | 213399                                                      | 102103                                                 | 32905                                             |
| 30-34     | 0,00296                      | 150606                                                      | 114843                                                 | 34252                                             |
| 35-39     | 0,00284                      | 135738                                                      | 126231                                                 | 45422                                             |
| 40-44     | 0,00310                      | 130323                                                      | 113905                                                 | 41560                                             |
| 45-49     | 0,00384                      | 93601                                                       | 93124                                                  | 37727                                             |
| 50-54     | 0,00574                      | 72003                                                       | 66225                                                  | 22223                                             |
| 55-59     | 0,00798                      | 47562                                                       | 52691                                                  | 21916                                             |

†Values used in this table are for the urban population

<sup>1</sup> Initial value used in the stock of not-overweight population in 2005 for middle SES.

<sup>2</sup> Initial value used in the stock of overweight population in 2005 for middle SES.

<sup>3</sup> Initial value used in the stock of obese population in 2005 for middle SES.

**Table 15. Women mortality rates and population size by age group for the middle socioeconomic status population<sup>†</sup>**

| Age group | Mortality rates (R) (%/year) | Not- overweight women in 2005 (Number of people) <sup>1</sup> | Overweight women in 2005 (Number of people) <sup>2</sup> | Obese women in 2005 (Number of people) <sup>3</sup> |
|-----------|------------------------------|---------------------------------------------------------------|----------------------------------------------------------|-----------------------------------------------------|
| 0-4       | 0,00289                      | 320869                                                        | 74652                                                    | 16437                                               |
| 5-9       | 0,00023                      | 351216                                                        | 55255                                                    | 22864                                               |
| 10-14     | 0,00024                      | 362400                                                        | 60592                                                    | 18466                                               |
| 15-19     | 0,00049                      | 332035                                                        | 56212                                                    | 14291                                               |
| 20-24     | 0,00066                      | 285040                                                        | 76444                                                    | 25378                                               |
| 25-29     | 0,00065                      | 233307                                                        | 107982                                                   | 38285                                               |
| 30-34     | 0,00085                      | 154577                                                        | 123728                                                   | 56059                                               |
| 35-39     | 0,00107                      | 154789                                                        | 126387                                                   | 69939                                               |
| 40-44     | 0,00146                      | 116820                                                        | 133190                                                   | 77012                                               |
| 45-49     | 0,00218                      | 72273                                                         | 113433                                                   | 75838                                               |
| 50-54     | 0,00337                      | 50514                                                         | 73828                                                    | 62470                                               |
| 55-59     | 0,00523                      | 41376                                                         | 55168                                                    | 46705                                               |

<sup>†</sup>Values used in this table are for the urban population

<sup>1</sup> Initial value used in the stock of not-overweight population in 2005 for middle SES.

<sup>2</sup> Initial value used in the stock of overweight population in 2005 for middle SES.

<sup>3</sup> Initial value used in the stock of obese population in 2005 for middle SES.

**Table 16. Man mortality rates and population size by age group for the higher socioeconomic status population<sup>†</sup>**

| Age group | Mortality rates (R) (%/year) | Not- overweight men in 2005 (Number of people) <sup>1</sup> | Overweight men in 2005 (Number of people) <sup>2</sup> | Obese men in 2005 (Number of people) <sup>3</sup> |
|-----------|------------------------------|-------------------------------------------------------------|--------------------------------------------------------|---------------------------------------------------|
| 0-4       | 0,00357                      | 348113                                                      | 88721                                                  | 31711                                             |
| 5-9       | 0,00032                      | 358950                                                      | 89423                                                  | 46601                                             |
| 10-14     | 0,00033                      | 399228                                                      | 76699                                                  | 34744                                             |
| 15-19     | 0,00155                      | 483279                                                      | 64757                                                  | 17388                                             |
| 20-24     | 0,00293                      | 407134                                                      | 121362                                                 | 33890                                             |
| 25-29     | 0,00305                      | 280661                                                      | 166945                                                 | 45486                                             |
| 30-34     | 0,00296                      | 189894                                                      | 189391                                                 | 60444                                             |
| 35-39     | 0,00284                      | 169012                                                      | 205984                                                 | 81337                                             |
| 40-44     | 0,00310                      | 140072                                                      | 221653                                                 | 84146                                             |
| 45-49     | 0,00384                      | 124643                                                      | 196277                                                 | 71156                                             |
| 50-54     | 0,00574                      | 97782                                                       | 150229                                                 | 64447                                             |
| 55-59     | 0,00798                      | 82068                                                       | 117506                                                 | 53624                                             |

<sup>†</sup>Values used in this table are for the urban population

<sup>1</sup> Initial value used in the stock of not-overweight population in 2005 for higher SES.

<sup>2</sup> Initial value used in the stock of overweight population in 2005 for higher SES.

<sup>3</sup> Initial value used in the stock of obese population in 2005 for higher SES.

**Table 17. Women mortality rates and population size by age group for the higher socioeconomic status population<sup>†</sup>**

| Age group | Mortality rates (R) (%/year) | Not- overweight women in 2005 (Number of people) <sup>1</sup> | Overweight women in 2005 (Number of people) <sup>2</sup> | Obese women in 2005 (Number of people) <sup>3</sup> |
|-----------|------------------------------|---------------------------------------------------------------|----------------------------------------------------------|-----------------------------------------------------|
| 0-4       | 0,00289                      | 337851                                                        | 87222                                                    | 25989                                               |
| 5-9       | 0,00023                      | 367555                                                        | 85451                                                    | 26338                                               |
| 10-14     | 0,00024                      | 386919                                                        | 83719                                                    | 24890                                               |
| 15-19     | 0,00049                      | 465482                                                        | 83787                                                    | 17289                                               |
| 20-24     | 0,00066                      | 460639                                                        | 113529                                                   | 28708                                               |
| 25-29     | 0,00065                      | 356321                                                        | 133820                                                   | 47061                                               |

|              |         |        |        |        |
|--------------|---------|--------|--------|--------|
| <b>30-34</b> | 0,00085 | 264860 | 154972 | 70755  |
| <b>35-39</b> | 0,00107 | 237476 | 195942 | 87825  |
| <b>40-44</b> | 0,00146 | 203703 | 197731 | 108768 |
| <b>45-49</b> | 0,00218 | 131088 | 194393 | 131387 |
| <b>50-54</b> | 0,00337 | 88819  | 160613 | 114358 |
| <b>55-59</b> | 0,00523 | 70102  | 125824 | 100959 |

†Values used in this table are for the urban population

<sup>1</sup> Initial value used in the stock of not-overweight population in 2005 for higher SES.

<sup>2</sup> Initial value used in the stock of overweight population in 2005 for higher SES.

<sup>3</sup> Initial value used in the stock of obese population in 2005 for higher SES.

**Table 18. Data and projections of the Fertility rates†**

| <b>Year</b> | <b>Fertility rate</b> | <b>Year</b> | <b>Fertility rate</b> | <b>Year</b> | <b>Fertility rate</b> |
|-------------|-----------------------|-------------|-----------------------|-------------|-----------------------|
| 1960        | 6.807                 | 1985        | 3.420                 | 2010        | 2.010                 |
| 1961        | 6.801                 | 1986        | 3.320                 | 2011        | 1.978                 |
| 1962        | 6.779                 | 1987        | 3.227                 | 2012        | 1.948                 |
| 1963        | 6.736                 | 1988        | 3.142                 | 2013        | 1.921                 |
| 1964        | 6.668                 | 1989        | 3.065                 | 2014        | 1.897                 |
| 1965        | 6.567                 | 1990        | 2.994                 | 2015        | 1.874                 |
| 1966        | 6.425                 | 1991        | 2.927                 | 2016        | 1.851                 |
| 1967        | 6.246                 | 1992        | 2.860                 | 2017        | 1.828                 |
| 1968        | 6.034                 | 1993        | 2.794                 | 2018        | 1.805                 |
| 1969        | 5.797                 | 1994        | 2.727                 | 2019        | 1.782                 |
| 1970        | 5.548                 | 1995        | 2.660                 | 2020        | 1.759                 |
| 1971        | 5.300                 | 1996        | 2.596                 | 2021        | 1.736                 |
| 1972        | 5.067                 | 1997        | 2.535                 | 2022        | 1.713                 |
| 1973        | 4.857                 | 1998        | 2.481                 | 2023        | 1.690                 |
| 1974        | 4.675                 | 1999        | 2.432                 | 2024        | 1.667                 |
| 1975        | 4.523                 | 2000        | 2.389                 | 2025        | 1.644                 |
| 1976        | 4.396                 | 2001        | 2.349                 | 2026        | 1.621                 |
| 1977        | 4.284                 | 2002        | 2.311                 | 2027        | 1.598                 |
| 1978        | 4.177                 | 2003        | 2.274                 | 2028        | 1.575                 |
| 1979        | 4.071                 | 2004        | 2.236                 | 2029        | 1.552                 |
| 1980        | 3.965                 | 2005        | 2.197                 | 2030        | 1.529                 |
| 1981        | 3.855                 | 2006        | 2.157                 |             |                       |
| 1982        | 3.744                 | 2007        | 2.118                 |             |                       |
| 1983        | 3.634                 | 2008        | 2.080                 |             |                       |
| 1984        | 3.526                 | 2009        | 2.044                 |             |                       |

† Data of Fertility rate of world Data Bank(1960–2015)[1] was used to forecast the fertility rate from 2015 to 2030. Holt-Winters no seasonal method in EViews 5 (Quantitative Micro Software, LLC) was used to forecast the fertility rate. In the SD model we used data from 2005 to 2030.

## References

- 1 World Data Bank. World Development Indicators. <http://databank.worldbank.org/data/reports.aspx?source=World%20Development%20Indicators> (accessed 22 Aug 2019).

1  
2  
3  
4  
5  
6  
7  
8  
9  
10  
11  
12  
13  
14  
15  
16  
17  
18  
19  
20  
21  
22  
23  
24  
25  
26  
27  
28  
29  
30  
31  
32  
33  
34  
35  
36  
37  
38  
39  
40  
41  
42  
43  
44  
45  
46  
47  
48  
49  
50  
51  
52  
53  
54  
55  
56  
57  
58  
59  
60

**Supplementary Information 2**

**Supplement to: Using a system dynamics model to Uunderstand the obesity transition by socioeconomic status in Colombia at the country, regional, and department level.**

For peer review only

## Table of contents

|                                                                                        |     |
|----------------------------------------------------------------------------------------|-----|
| Section 1. Parameters and data used in the model at regional and department level..... | 3   |
| 1.1 Caribe region.....                                                                 | 3   |
| 1.1.1 Data and model parameters used.....                                              | 3   |
| 1.2 Oriental region.....                                                               | 30  |
| 1.2.1 Data and model parameters used.....                                              | 30  |
| 1.3 Central region.....                                                                | 50  |
| 1.3.1 Data and model parameters used.....                                              | 50  |
| 1.4 Pacifica Region.....                                                               | 75  |
| 1.4.1 Data and model parameters used.....                                              | 75  |
| 1.5 Bogotá.....                                                                        | 93  |
| 1.5.1 Data and model parameters used.....                                              | 93  |
| 1.6 Orinoquia y Amazonia region.....                                                   | 100 |
| 1.6.1 Data and model parameters used.....                                              | 100 |
| References.....                                                                        | 124 |

## Section 1. Parameters and data used in the model at regional and department level

The following tables describe the data and parameters used in the two system dynamics (SD) models: SD model of the entire urban population and SD model segregated by socioeconomic status (SES) and to estimate the transference rates (TRs) by age, body mass index (BMI) category, and socioeconomic status (SES) at regional and department level.

### 1.1 Caribe region

The Caribbean region of Colombia is located in the north-western area of the national territory and consists of eight departments and the island region of San Andres, the departments are:

- Atlántico (08)
- Bolívar (13)
- Cesar (20)
- Córdoba (23)
- La Guajira (44)
- Magdalena (47)
- Sucre (70)
- San Andrés (88)

#### 1.1.1 Data and model parameters used

**Table 1. Prevalent rates of entire population by age group, sex, and body mass index category in 2005 (Caribe region)**

| Age Group | Nutritional State Males |           |         | Nutritional State Females |           |         |
|-----------|-------------------------|-----------|---------|---------------------------|-----------|---------|
|           | Not-Overweigh           | Overweigh | Obese   | Not-Overweigh             | Overweigh | Obese   |
| 0-4       | 0,74780                 | 0,20256   | 0,04964 | 0,80065                   | 0,16436   | 0,03499 |
| 5-9       | 0,83481                 | 0,10835   | 0,05684 | 0,84971                   | 0,11753   | 0,03276 |
| 10-14     | 0,87175                 | 0,09359   | 0,03466 | 0,85540                   | 0,12544   | 0,01916 |
| 15-19     | 0,90159                 | 0,07381   | 0,02460 | 0,85434                   | 0,12254   | 0,02312 |
| 20-24     | 0,76897                 | 0,18527   | 0,04576 | 0,78406                   | 0,16718   | 0,04876 |
| 25-29     | 0,63319                 | 0,28312   | 0,08368 | 0,64600                   | 0,25427   | 0,09973 |
| 30-34     | 0,50084                 | 0,38526   | 0,11390 | 0,51341                   | 0,33764   | 0,14896 |
| 35-39     | 0,46274                 | 0,39168   | 0,14558 | 0,47688                   | 0,35046   | 0,17266 |
| 40-44     | 0,45455                 | 0,40074   | 0,14471 | 0,41704                   | 0,38164   | 0,20133 |
| 45-49     | 0,42549                 | 0,39957   | 0,17495 | 0,32316                   | 0,42621   | 0,25064 |
| 50-54     | 0,46341                 | 0,35501   | 0,18157 | 0,33382                   | 0,38653   | 0,27965 |
| 55-59     | 0,45779                 | 0,37338   | 0,16883 | 0,33589                   | 0,38772   | 0,27639 |



**Table 2. Prevalent rates of lower socioeconomic status population by age group, sex, and body mass index category in 2005 (Caribe region)**

| Age Group | Nutritional State Males |           |         | Nutritional State Females |           |         |
|-----------|-------------------------|-----------|---------|---------------------------|-----------|---------|
|           | Not-Overweigh           | Overweigh | Obese   | Not-Overweigh             | Overweigh | Obese   |
| 0-4       | 0,76609                 | 0,20251   | 0,03140 | 0,83223                   | 0,14784   | 0,01993 |
| 5-9       | 0,90942                 | 0,06884   | 0,02174 | 0,90040                   | 0,08765   | 0,01195 |
| 10-14     | 0,92193                 | 0,06320   | 0,01487 | 0,90164                   | 0,08607   | 0,01230 |
| 15-19     | 0,95738                 | 0,04262   | 0,00000 | 0,86782                   | 0,10920   | 0,02299 |
| 20-24     | 0,83469                 | 0,13008   | 0,03523 | 0,78330                   | 0,17097   | 0,04573 |
| 25-29     | 0,70874                 | 0,24919   | 0,04207 | 0,65051                   | 0,25765   | 0,09184 |
| 30-34     | 0,63178                 | 0,29070   | 0,07752 | 0,55585                   | 0,30319   | 0,14096 |
| 35-39     | 0,57391                 | 0,34783   | 0,07826 | 0,48997                   | 0,33524   | 0,17479 |
| 40-44     | 0,58209                 | 0,32836   | 0,08955 | 0,48693                   | 0,34314   | 0,16993 |
| 45-49     | 0,57143                 | 0,32298   | 0,10559 | 0,36965                   | 0,40467   | 0,22568 |
| 50-54     | 0,58974                 | 0,29487   | 0,11538 | 0,44907                   | 0,33796   | 0,21296 |
| 55-59     | 0,62376                 | 0,24752   | 0,12871 | 0,48810                   | 0,30357   | 0,20833 |

**Table 3. Prevalent rates of middle socioeconomic status population by age group, sex, and body mass index category in 2005 (Caribe region)**

| Age Group | Nutritional State Males |           |         | Nutritional State Females |           |         |
|-----------|-------------------------|-----------|---------|---------------------------|-----------|---------|
|           | Not-Overweigh           | Overweigh | Obese   | Not-Overweigh             | Overweigh | Obese   |
| 0-4       | 0,72063                 | 0,22540   | 0,05397 | 0,77982                   | 0,17737   | 0,04281 |
| 5-9       | 0,86000                 | 0,09333   | 0,04667 | 0,82550                   | 0,10738   | 0,06711 |
| 10-14     | 0,87975                 | 0,08228   | 0,03797 | 0,86127                   | 0,13295   | 0,00578 |
| 15-19     | 0,88710                 | 0,05376   | 0,05914 | 0,84375                   | 0,12946   | 0,02679 |
| 20-24     | 0,79583                 | 0,17500   | 0,02917 | 0,79063                   | 0,16529   | 0,04408 |
| 25-29     | 0,63902                 | 0,27805   | 0,08293 | 0,62145                   | 0,25237   | 0,12618 |
| 30-34     | 0,44156                 | 0,44805   | 0,11039 | 0,51389                   | 0,35069   | 0,13542 |
| 35-39     | 0,43671                 | 0,37975   | 0,18354 | 0,48814                   | 0,34576   | 0,16610 |
| 40-44     | 0,45399                 | 0,39264   | 0,15337 | 0,37209                   | 0,43023   | 0,19767 |
| 45-49     | 0,39370                 | 0,37795   | 0,22835 | 0,31050                   | 0,45662   | 0,23288 |
| 50-54     | 0,49398                 | 0,31325   | 0,19277 | 0,33500                   | 0,39500   | 0,27000 |
| 55-59     | 0,45977                 | 0,39080   | 0,14943 | 0,30534                   | 0,38931   | 0,30534 |

**Table 4. Prevalent rates of higher socioeconomic status population by age group, sex, and body mass index category in 2005 (Caribe region)**

| Age Group | Nutritional State Males |           |         | Nutritional State Females |           |         |
|-----------|-------------------------|-----------|---------|---------------------------|-----------|---------|
|           | Not-Overweigh           | Overweigh | Obese   | Not-Overweigh             | Overweigh | Obese   |
| 0-4       | 0.73737                 | 0.17845   | 0.08418 | 0.76000                   | 0.18333   | 0.05667 |
| 5-9       | 0.65693                 | 0.20438   | 0.13869 | 0.77311                   | 0.19328   | 0.03361 |
| 10-14     | 0.77333                 | 0.16000   | 0.06667 | 0.77707                   | 0.17834   | 0.04459 |
| 15-19     | 0.83000                 | 0.14000   | 0.03000 | 0.84642                   | 0.13311   | 0.02048 |
| 20-24     | 0.66202                 | 0.26481   | 0.07317 | 0.77934                   | 0.16432   | 0.05634 |
| 25-29     | 0.51232                 | 0.33990   | 0.14778 | 0.66089                   | 0.25248   | 0.08663 |
| 30-34     | 0.36757                 | 0.46486   | 0.16757 | 0.46647                   | 0.36443   | 0.16910 |
| 35-39     | 0.34921                 | 0.45503   | 0.19577 | 0.45289                   | 0.37082   | 0.17629 |
| 40-44     | 0.30857                 | 0.49143   | 0.20000 | 0.38824                   | 0.37941   | 0.23235 |
| 45-49     | 0.31429                 | 0.48571   | 0.20000 | 0.29355                   | 0.42258   | 0.28387 |
| 50-54     | 0.29231                 | 0.45385   | 0.25385 | 0.23970                   | 0.41948   | 0.34082 |
| 55-59     | 0.31667                 | 0.46667   | 0.21667 | 0.23874                   | 0.45045   | 0.31081 |

**Table 5. Prevalent rates of entire population by age group, sex, and body mass index category in 2010 (Caribe region)**

| Age Group | Nutritional State Males |           |         | Nutritional State Females |           |         |
|-----------|-------------------------|-----------|---------|---------------------------|-----------|---------|
|           | Not-Overweigh           | Overweigh | Obese   | Not-Overweigh             | Overweigh | Obese   |
| 0-4       | 0.74984                 | 0.19572   | 0.05444 | 0.78199                   | 0.17084   | 0.04718 |
| 5-9       | 0.81667                 | 0.11923   | 0.06410 | 0.81776                   | 0.12989   | 0.05235 |
| 10-14     | 0.81581                 | 0.12345   | 0.06074 | 0.80601                   | 0.14958   | 0.04442 |
| 15-19     | 0.86134                 | 0.09872   | 0.03994 | 0.81877                   | 0.14296   | 0.03827 |
| 20-24     | 0.73229                 | 0.19167   | 0.07604 | 0.71296                   | 0.20463   | 0.08241 |
| 25-29     | 0.53554                 | 0.32108   | 0.14338 | 0.55194                   | 0.30804   | 0.14002 |
| 30-34     | 0.44954                 | 0.36566   | 0.18480 | 0.44521                   | 0.34834   | 0.20646 |
| 35-39     | 0.38959                 | 0.40788   | 0.20253 | 0.39918                   | 0.37769   | 0.22313 |
| 40-44     | 0.34884                 | 0.42151   | 0.22965 | 0.34736                   | 0.40215   | 0.25049 |
| 45-49     | 0.39465                 | 0.44969   | 0.15566 | 0.25573                   | 0.44725   | 0.29702 |
| 50-54     | 0.40234                 | 0.41016   | 0.18750 | 0.29475                   | 0.39569   | 0.30956 |
| 55-59     | 0.41422                 | 0.42402   | 0.16176 | 0.25291                   | 0.40266   | 0.34443 |

**Table 6. Prevalent rates of lower socioeconomic status population by age group, sex, and body mass index category in 2010 (Caribe region)**

| Age Group | Nutritional State Males |           |         | Nutritional State Females |           |         |
|-----------|-------------------------|-----------|---------|---------------------------|-----------|---------|
|           | Not-Overweigh           | Overweigh | Obese   | Not-Overweigh             | Overweigh | Obese   |
| 0-4       | 0.74797                 | 0.20209   | 0.04994 | 0.79267                   | 0.16941   | 0.03793 |
| 5-9       | 0.84961                 | 0.10213   | 0.04826 | 0.85615                   | 0.10325   | 0.04060 |
| 10-14     | 0.85993                 | 0.09501   | 0.04507 | 0.81165                   | 0.15242   | 0.03594 |
| 15-19     | 0.89886                 | 0.07407   | 0.02707 | 0.81686                   | 0.14680   | 0.03634 |
| 20-24     | 0.76459                 | 0.16298   | 0.07243 | 0.69811                   | 0.20755   | 0.09434 |
| 25-29     | 0.61330                 | 0.27586   | 0.11084 | 0.52495                   | 0.32163   | 0.15342 |
| 30-34     | 0.50505                 | 0.34848   | 0.14646 | 0.42520                   | 0.33858   | 0.23622 |
| 35-39     | 0.45580                 | 0.36464   | 0.17956 | 0.40889                   | 0.36889   | 0.22222 |

|       |         |         |         |         |         |         |
|-------|---------|---------|---------|---------|---------|---------|
| 40-44 | 0.37330 | 0.43324 | 0.19346 | 0.35700 | 0.38742 | 0.25558 |
| 45-49 | 0.43558 | 0.42331 | 0.14110 | 0.27569 | 0.40852 | 0.31579 |
| 50-54 | 0.48289 | 0.36502 | 0.15209 | 0.31686 | 0.38663 | 0.29651 |
| 55-59 | 0.51064 | 0.38298 | 0.10638 | 0.29412 | 0.38824 | 0.31765 |

**Table 7. Prevalent rates of middle socioeconomic status population by age group, sex, and body mass index category in 2010 (Caribe region)**

| Age Group | Nutritional State Males |           |         | Nutritional State Females |           |         |
|-----------|-------------------------|-----------|---------|---------------------------|-----------|---------|
|           | Not-Overweigh           | Overweigh | Obese   | Not-Overweigh             | Overweigh | Obese   |
| 0-4       | 0.80612                 | 0.15306   | 0.04082 | 0.80352                   | 0.14663   | 0.04985 |
| 5-9       | 0.81548                 | 0.13393   | 0.05060 | 0.85559                   | 0.11172   | 0.03270 |
| 10-14     | 0.81572                 | 0.15718   | 0.02710 | 0.83333                   | 0.13218   | 0.03448 |
| 15-19     | 0.86875                 | 0.10313   | 0.02813 | 0.84146                   | 0.10976   | 0.04878 |
| 20-24     | 0.76077                 | 0.17703   | 0.06220 | 0.72374                   | 0.21790   | 0.05837 |
| 25-29     | 0.57346                 | 0.27962   | 0.14692 | 0.60465                   | 0.29070   | 0.10465 |
| 30-34     | 0.48276                 | 0.33333   | 0.18391 | 0.45126                   | 0.37906   | 0.16968 |
| 35-39     | 0.34426                 | 0.43716   | 0.21858 | 0.42041                   | 0.33469   | 0.24490 |
| 40-44     | 0.36667                 | 0.39333   | 0.24000 | 0.35135                   | 0.40154   | 0.24710 |
| 45-49     | 0.41060                 | 0.45033   | 0.13907 | 0.21287                   | 0.47030   | 0.31683 |
| 50-54     | 0.45872                 | 0.38532   | 0.15596 | 0.36420                   | 0.35185   | 0.28395 |
| 55-59     | 0.43956                 | 0.41758   | 0.14286 | 0.27941                   | 0.34559   | 0.37500 |

**Table 8. Prevalent rates of higher socioeconomic status population by age group, sex, and body mass index category in 2010 (Caribe region)**

| Age Group | Nutritional State Males |           |         | Nutritional State Females |           |         |
|-----------|-------------------------|-----------|---------|---------------------------|-----------|---------|
|           | Not-Overweigh           | Overweigh | Obese   | Not-Overweigh             | Overweigh | Obese   |
| 0-4       | 0.67931                 | 0.23448   | 0.08621 | 0.72285                   | 0.20599   | 0.07116 |
| 5-9       | 0.72973                 | 0.15015   | 0.12012 | 0.65000                   | 0.23571   | 0.11429 |
| 10-14     | 0.70968                 | 0.15543   | 0.13490 | 0.76862                   | 0.15957   | 0.07181 |
| 15-19     | 0.76721                 | 0.15082   | 0.08197 | 0.80217                   | 0.16531   | 0.03252 |
| 20-24     | 0.64567                 | 0.25984   | 0.09449 | 0.73038                   | 0.18771   | 0.08191 |
| 25-29     | 0.33668                 | 0.45729   | 0.20603 | 0.55519                   | 0.29870   | 0.14610 |
| 30-34     | 0.30570                 | 0.43005   | 0.26425 | 0.48101                   | 0.33333   | 0.18565 |
| 35-39     | 0.29518                 | 0.46988   | 0.23494 | 0.36525                   | 0.42908   | 0.20567 |
| 40-44     | 0.28070                 | 0.42105   | 0.29825 | 0.32593                   | 0.42963   | 0.24444 |
| 45-49     | 0.29560                 | 0.50314   | 0.20126 | 0.25830                   | 0.48708   | 0.25461 |
| 50-54     | 0.20714                 | 0.51429   | 0.27857 | 0.21519                   | 0.43882   | 0.34599 |
| 55-59     | 0.25581                 | 0.48837   | 0.25581 | 0.18571                   | 0.45714   | 0.35714 |

**Table 9. Fraction of births for men by body mass index category, and socioeconomic status (Caribe region) †**

| Population group | Lower SES (%/year) | Middle SES (%/year) | Higher SES (%/year) | Complete Urban Population (%/year) |
|------------------|--------------------|---------------------|---------------------|------------------------------------|
| Not- overweight  | 84,96%             | 72,73%              | 75,86%              | 79,77%                             |
| Overweight       | 9,77%              | 18,18%              | 15,52%              | 13,23%                             |
| Obese            | 5,26%              | 9,09%               | 8,62%               | 7,00%                              |

† The fractions of births by each BMI category correspond to the prevalences by BMI category of children aged

0 to 12 months

**Table 10. Fraction of births for women by body mass index category and socioeconomic status (Caribe region) †**

| Population group | Lower SES (%/year) | Middle SES (%/year) | Higher SES (%/year) | Complete Urban Population (%/year) |
|------------------|--------------------|---------------------|---------------------|------------------------------------|
| Not- overweight  | 81,43%             | 75,68%              | 69,84%              | 77,26%                             |
| Overweight       | 17,86%             | 17,57%              | 22,22%              | 18,77%                             |
| Obese            | 0,71%              | 6,76%               | 7,94%               | 3,97%                              |

† The fractions of births by each BMI category correspond to the prevalences by BMI category of children aged 0 to 12 months

**Table 11. Mortality rates for men and population size by age group without segregate by socioeconomic status (Caribe region) †**

| Age group | Mortality rates (R) (%/year) | Not- overweight men in 2005 (Number of people) <sup>1</sup> | Overweight men in 2005 (Number of people) <sup>2</sup> | Obese men in 2005 (Number of people) <sup>3</sup> |
|-----------|------------------------------|-------------------------------------------------------------|--------------------------------------------------------|---------------------------------------------------|
| 0-4       | 0,00612                      | 269775                                                      | 73076                                                  | 17908                                             |
| 5-9       | 0,00046                      | 301926                                                      | 39186                                                  | 20557                                             |
| 10-14     | 0,00045                      | 310652                                                      | 33350                                                  | 12352                                             |
| 15-19     | 0,00161                      | 297832                                                      | 24381                                                  | 8127                                              |
| 20-24     | 0,00368                      | 218694                                                      | 52690                                                  | 13014                                             |
| 25-29     | 0,00423                      | 157427                                                      | 70391                                                  | 20805                                             |
| 30-34     | 0,00416                      | 108075                                                      | 83134                                                  | 24579                                             |
| 35-39     | 0,00403                      | 98567                                                       | 83431                                                  | 31010                                             |
| 40-44     | 0,00481                      | 90149                                                       | 79478                                                  | 28700                                             |
| 45-49     | 0,00574                      | 68289                                                       | 64129                                                  | 28078                                             |
| 50-54     | 0,00843                      | 58448                                                       | 44776                                                  | 22901                                             |
| 55-59     | 0,01214                      | 44561                                                       | 36344                                                  | 16434                                             |

† Values used in this table are for the urban population

<sup>1</sup> Initial value used in the stock of not-overweight population in 2005.

<sup>2</sup> Initial value used in the stock of overweight population in 2005.

<sup>3</sup> Initial value used in the stock of obese population in 2005.

**Table 12. Mortality rates for women and population size by age group without segregate by socioeconomic status (Caribe region) †**

| Age group | Mortality rates (R) (%/year) | Not- overweight men in 2005 (Number of people) <sup>1</sup> | Overweight men in 2005 (Number of people) <sup>2</sup> | Obese men in 2005 (Number of people) <sup>3</sup> |
|-----------|------------------------------|-------------------------------------------------------------|--------------------------------------------------------|---------------------------------------------------|
| 0-4       | 0,01083                      | 278590                                                      | 57190                                                  | 12174                                             |
| 5-9       | 0,00023                      | 297854                                                      | 41200                                                  | 11482                                             |
| 10-14     | 0,00022                      | 294633                                                      | 43205                                                  | 6601                                              |
| 15-19     | 0,00033                      | 281467                                                      | 40373                                                  | 7618                                              |
| 20-24     | 0,00048                      | 240108                                                      | 51198                                                  | 14933                                             |
| 25-29     | 0,00046                      | 175494                                                      | 69075                                                  | 27093                                             |
| 30-34     | 0,00060                      | 122749                                                      | 80725                                                  | 35614                                             |
| 35-39     | 0,00089                      | 114031                                                      | 83803                                                  | 41287                                             |
| 40-44     | 0,00113                      | 90818                                                       | 83110                                                  | 43843                                             |
| 45-49     | 0,00184                      | 57737                                                       | 76149                                                  | 44780                                             |
| 50-54     | 0,00239                      | 46299                                                       | 53610                                                  | 38786                                             |
| 55-59     | 0,00349                      | 36233                                                       | 41823                                                  | 29814                                             |

† Values used in this table are for the urban population

<sup>1</sup> Initial value used in the stock of not-overweight population in 2005.

<sup>2</sup> Initial value used in the stock of overweight population in 2005.

<sup>3</sup> Initial value used in the stock of obese population in 2005.

**Table 13. Man mortality rates and population size by age group for the lower socioeconomic status population (Caribe region) †**

| Age group | Mortality rates (R) (%/year) | Not- overweight men in 2005 (Number of people) <sup>1</sup> | Overweight men in 2005 (Number of people) <sup>2</sup> | Obese men in 2005 (Number of people) <sup>3</sup> |
|-----------|------------------------------|-------------------------------------------------------------|--------------------------------------------------------|---------------------------------------------------|
| 0-4       | 0,00612                      | 140953                                                      | 37260                                                  | 5777                                              |
| 5-9       | 0,00046                      | 161241                                                      | 12206                                                  | 3854                                              |
| 10-14     | 0,00045                      | 153164                                                      | 10499                                                  | 2470                                              |
| 15-19     | 0,00161                      | 139594                                                      | 6215                                                   | 0                                                 |
| 20-24     | 0,00368                      | 97762                                                       | 15236                                                  | 4126                                              |
| 25-29     | 0,00423                      | 75939                                                       | 26700                                                  | 4508                                              |
| 30-34     | 0,00416                      | 58917                                                       | 27109                                                  | 7229                                              |
| 35-39     | 0,00403                      | 48730                                                       | 29533                                                  | 6645                                              |
| 40-44     | 0,00481                      | 43051                                                       | 24285                                                  | 6623                                              |
| 45-49     | 0,00574                      | 31891                                                       | 18025                                                  | 5893                                              |
| 50-54     | 0,00843                      | 31446                                                       | 15723                                                  | 6152                                              |
| 55-59     | 0,01214                      | 19910                                                       | 7901                                                   | 4108                                              |

†Values used in this table are for the urban population

<sup>1</sup> Initial value used in the stock of not-overweight population in 2005 for lower SES.

<sup>2</sup> Initial value used in the stock of overweight population in 2005 for lower SES.

<sup>3</sup> Initial value used in the stock of obese population in 2005 for lower SES.

**Table 14. Women mortality rates and population size by age group for the lower socioeconomic status population (Caribe region) †**

| Age group | Mortality rates (R) (%/year) | Not- overweight women in 2005 (Number of people) <sup>1</sup> | Overweight women in 2005 (Number of people) <sup>2</sup> | Obese women in 2005 (Number of people) <sup>3</sup> |
|-----------|------------------------------|---------------------------------------------------------------|----------------------------------------------------------|-----------------------------------------------------|
| 0-4       | 0,01083                      | 147687                                                        | 26236                                                    | 3537                                                |
| 5-9       | 0,00023                      | 154728                                                        | 15062                                                    | 2054                                                |
| 10-14     | 0,00022                      | 144784                                                        | 13820                                                    | 1974                                                |
| 15-19     | 0,00033                      | 126197                                                        | 15879                                                    | 3343                                                |
| 20-24     | 0,00048                      | 98789                                                         | 21563                                                    | 5767                                                |
| 25-29     | 0,00046                      | 76159                                                         | 30165                                                    | 10752                                               |
| 30-34     | 0,00060                      | 57433                                                         | 31327                                                    | 14564                                               |
| 35-39     | 0,00089                      | 46702                                                         | 31954                                                    | 16660                                               |
| 40-44     | 0,00113                      | 39543                                                         | 27866                                                    | 13800                                               |
| 45-49     | 0,00184                      | 22966                                                         | 25141                                                    | 14021                                               |
| 50-54     | 0,00239                      | 26332                                                         | 19817                                                    | 12487                                               |
| 55-59     | 0,00349                      | 17265                                                         | 10738                                                    | 7369                                                |

†Values used in this table are for the urban population

<sup>1</sup> Initial value used in the stock of not-overweight population in 2005 for lower SES.

<sup>2</sup> Initial value used in the stock of overweight population in 2005 for lower SES.

<sup>3</sup> Initial value used in the stock of obese population in 2005 for lower SES.

**Table 15. Man mortality rates and population size by age group for the middle socioeconomic status population (Caribe region) †**

| Age group | Mortality rates (R) (%/year) | Not- overweight men in 2005 (Number of people) <sup>1</sup> | Overweight men in 2005 (Number of people) <sup>2</sup> | Obese men in 2005 (Number of people) <sup>3</sup> |
|-----------|------------------------------|-------------------------------------------------------------|--------------------------------------------------------|---------------------------------------------------|
| 0-4       | 0,00612                      | 65566                                                       | 20508                                                  | 4910                                              |
| 5-9       | 0,00046                      | 82869                                                       | 8994                                                   | 4497                                              |
| 10-14     | 0,00045                      | 85846                                                       | 8029                                                   | 3706                                              |

|       |         |       |       |       |
|-------|---------|-------|-------|-------|
| 15-19 | 0,00161 | 78880 | 4781  | 5259  |
| 20-24 | 0,00368 | 60625 | 13331 | 2222  |
| 25-29 | 0,00423 | 45425 | 19765 | 5895  |
| 30-34 | 0,00416 | 24579 | 24940 | 6145  |
| 35-39 | 0,00403 | 25472 | 22150 | 10706 |
| 40-44 | 0,00481 | 27229 | 23549 | 9199  |
| 45-49 | 0,00574 | 17332 | 16639 | 10053 |
| 50-54 | 0,00843 | 14014 | 8887  | 5469  |
| 55-59 | 0,01214 | 12641 | 10745 | 4108  |

†Values used in this table are for the urban population

1 Initial value used in the stock of not-overweight population in 2005 for middle SES.

2 Initial value used in the stock of overweight population in 2005 for middle SES.

3 Initial value used in the stock of obese population in 2005 for middle SES.

**Table 16. Women mortality rates and population size by age group for the middle socioeconomic status population (Caribe region) †**

| Age group | Mortality rates (R) (%/year) | Not- overweight women in 2005 (Number of people) <sup>1</sup> | Overweight women in 2005 (Number of people) <sup>2</sup> | Obese women in 2005 (Number of people) <sup>3</sup> |
|-----------|------------------------------|---------------------------------------------------------------|----------------------------------------------------------|-----------------------------------------------------|
| 0-4       | 0,01083                      | 68433                                                         | 15565                                                    | 3757                                                |
| 5-9       | 0,00023                      | 77096                                                         | 10029                                                    | 6268                                                |
| 10-14     | 0,00022                      | 81233                                                         | 12539                                                    | 545                                                 |
| 15-19     | 0,00033                      | 74825                                                         | 11481                                                    | 2375                                                |
| 20-24     | 0,00048                      | 64854                                                         | 13558                                                    | 3616                                                |
| 25-29     | 0,00046                      | 48269                                                         | 19602                                                    | 9801                                                |
| 30-34     | 0,00060                      | 31694                                                         | 21629                                                    | 8352                                                |
| 35-39     | 0,00089                      | 31962                                                         | 22640                                                    | 10876                                               |
| 40-44     | 0,00113                      | 24505                                                         | 28334                                                    | 13018                                               |
| 45-49     | 0,00184                      | 15217                                                         | 22378                                                    | 11413                                               |
| 50-54     | 0,00239                      | 10451                                                         | 12323                                                    | 8423                                                |
| 55-59     | 0,00349                      | 9304                                                          | 11862                                                    | 9304                                                |

†Values used in this table are for the urban population

1 Initial value used in the stock of not-overweight population in 2005 for middle SES.

2 Initial value used in the stock of overweight population in 2005 for middle SES.

3 Initial value used in the stock of obese population in 2005 for middle SES.

**Table 17. Man mortality rates and population size by age group for the higher socioeconomic status population (Caribe region) †**

| Age group | Mortality rates (R) (%/year) | Not- overweight men in 2005 (Number of people) <sup>1</sup> | Overweight men in 2005 (Number of people) <sup>2</sup> | Obese men in 2005 (Number of people) <sup>3</sup> |
|-----------|------------------------------|-------------------------------------------------------------|--------------------------------------------------------|---------------------------------------------------|
| 0-4       | 0,00612                      | 63256                                                       | 15308                                                  | 7221                                              |
| 5-9       | 0,00046                      | 57816                                                       | 17987                                                  | 12206                                             |
| 10-14     | 0,00045                      | 71641                                                       | 14822                                                  | 6176                                              |
| 15-19     | 0,00161                      | 79358                                                       | 13386                                                  | 2868                                              |
| 20-24     | 0,00368                      | 60308                                                       | 24123                                                  | 6666                                              |
| 25-29     | 0,00423                      | 36062                                                       | 23926                                                  | 10403                                             |
| 30-34     | 0,00416                      | 24579                                                       | 31085                                                  | 11205                                             |
| 35-39     | 0,00403                      | 24365                                                       | 31748                                                  | 13659                                             |
| 40-44     | 0,00481                      | 19869                                                       | 31644                                                  | 12878                                             |
| 45-49     | 0,00574                      | 19065                                                       | 29465                                                  | 12133                                             |
| 50-54     | 0,00843                      | 12988                                                       | 20166                                                  | 11279                                             |
| 55-59     | 0,01214                      | 12009                                                       | 17698                                                  | 8217                                              |

†Values used in this table are for the urban population

<sup>1</sup> Initial value used in the stock of not-overweight population in 2005 for higher SES.

<sup>2</sup> Initial value used in the stock of overweight population in 2005 for higher SES.

<sup>3</sup> Initial value used in the stock of obese population in 2005 for higher SES.

**Table 18. Women mortality rates and population size by age group for the higher socioeconomic status population (Caribe region) <sup>†</sup>**

| Age group | Mortality rates (R) (%/year) | Not- overweight women in 2005 (Number of people) <sup>1</sup> | Overweight women in 2005 (Number of people) <sup>2</sup> | Obese women in 2005 (Number of people) <sup>3</sup> |
|-----------|------------------------------|---------------------------------------------------------------|----------------------------------------------------------|-----------------------------------------------------|
| 0-4       | 0,01083                      | 62883                                                         | 15169                                                    | 4689                                                |
| 5-9       | 0,00023                      | 65946                                                         | 16486                                                    | 2867                                                |
| 10-14     | 0,00022                      | 69581                                                         | 15969                                                    | 3992                                                |
| 15-19     | 0,00033                      | 80711                                                         | 12693                                                    | 1953                                                |
| 20-24     | 0,00048                      | 76447                                                         | 16118                                                    | 5526                                                |
| 25-29     | 0,00046                      | 50832                                                         | 19419                                                    | 6663                                                |
| 30-34     | 0,00060                      | 34560                                                         | 27000                                                    | 12528                                               |
| 35-39     | 0,00089                      | 35473                                                         | 29045                                                    | 13808                                               |
| 40-44     | 0,00113                      | 27450                                                         | 26826                                                    | 16428                                               |
| 45-49     | 0,00184                      | 19823                                                         | 28537                                                    | 19170                                               |
| 50-54     | 0,00239                      | 11712                                                         | 20497                                                    | 16654                                               |
| 55-59     | 0,00349                      | 10034                                                         | 18931                                                    | 13063                                               |

<sup>†</sup>Values used in this table are for the urban population

<sup>1</sup> Initial value used in the stock of not-overweight population in 2005 for higher SES.

<sup>2</sup> Initial value used in the stock of overweight population in 2005 for higher SES.

<sup>3</sup> Initial value used in the stock of obese population in 2005 for higher SES.

**Table 19. Data and projections of the Fertility rates by department and Region (Caribe region) <sup>†</sup>**

| Year | Fecundity Rate Dept 08 | Fecundity Rate Dept 13 | Fecundity Rate Dept 20 | Fecundity Rate Dept 23 | Fecundity Rate Dept 44 | Fecundity Rate Dept 47 | Fecundity Rate Dept 70 | Fecundity Rate Dept 88 | Average Fecundity Rate |
|------|------------------------|------------------------|------------------------|------------------------|------------------------|------------------------|------------------------|------------------------|------------------------|
| 2005 | 2,4597                 | 2,9078                 | 3,2147                 | 3,1016                 | 4,0106                 | 3,2734                 | 2,9719                 | 2,3611                 | 3,038                  |
| 2006 | 2,4293                 | 2,8642                 | 3,1498                 | 3,0604                 | 3,9724                 | 3,2471                 | 2,9206                 | 2,3429                 | 2,998                  |
| 2007 | 2,3989                 | 2,8206                 | 3,0849                 | 3,0192                 | 3,9342                 | 3,2208                 | 2,8693                 | 2,3247                 | 2,959                  |
| 2008 | 2,3685                 | 2,777                  | 3,02                   | 2,978                  | 3,896                  | 3,1945                 | 2,818                  | 2,3065                 | 2,920                  |
| 2009 | 2,3467                 | 2,7432                 | 2,9725                 | 2,9384                 | 3,8417                 | 3,1575                 | 2,7801                 | 2,2935                 | 2,884                  |
| 2010 | 2,3249                 | 2,7094                 | 2,925                  | 2,8988                 | 3,7874                 | 3,1205                 | 2,7422                 | 2,2805                 | 2,849                  |
| 2011 | 2,3031                 | 2,6756                 | 2,8775                 | 2,8592                 | 3,7331                 | 3,0835                 | 2,7043                 | 2,2675                 | 2,813                  |
| 2012 | 2,2813                 | 2,6418                 | 2,83                   | 2,8196                 | 3,6788                 | 3,0465                 | 2,6664                 | 2,2545                 | 2,777                  |
| 2013 | 2,2595                 | 2,608                  | 2,7825                 | 2,78                   | 3,6245                 | 3,0095                 | 2,6285                 | 2,2415                 | 2,742                  |
| 2014 | 2,2456                 | 2,5863                 | 2,7528                 | 2,7494                 | 3,565                  | 2,9679                 | 2,6031                 | 2,2322                 | 2,713                  |
| 2015 | 2,2317                 | 2,5646                 | 2,7231                 | 2,7188                 | 3,5055                 | 2,9263                 | 2,5777                 | 2,2229                 | 2,684                  |
| 2016 | 2,2178                 | 2,5429                 | 2,6934                 | 2,6882                 | 3,446                  | 2,8847                 | 2,5523                 | 2,2136                 | 2,655                  |
| 2017 | 2,2039                 | 2,5212                 | 2,6637                 | 2,6576                 | 3,3865                 | 2,8431                 | 2,5269                 | 2,2043                 | 2,626                  |
| 2018 | 2,19                   | 2,4995                 | 2,634                  | 2,627                  | 3,327                  | 2,8015                 | 2,5015                 | 2,195                  | 2,597                  |
| 2019 | 2,1761                 | 2,4778                 | 2,6043                 | 2,5964                 | 3,2675                 | 2,7599                 | 2,4761                 | 2,1857                 | 2,568                  |
| 2020 | 2,1622                 | 2,4561                 | 2,5746                 | 2,5658                 | 3,208                  | 2,7183                 | 2,4507                 | 2,1764                 | 2,539                  |
| 2021 | 2,1483                 | 2,4344                 | 2,5449                 | 2,5352                 | 3,1485                 | 2,6767                 | 2,4253                 | 2,1671                 | 2,510                  |
| 2022 | 2,1344                 | 2,4127                 | 2,5152                 | 2,5046                 | 3,089                  | 2,6351                 | 2,3999                 | 2,1578                 | 2,481                  |
| 2023 | 2,1205                 | 2,391                  | 2,4855                 | 2,474                  | 3,0295                 | 2,5935                 | 2,3745                 | 2,1485                 | 2,452                  |

| Year | Fecundity Rate Dept 08 | Fecundity Rate Dept 13 | Fecundity Rate Dept 20 | Fecundity Rate Dept 23 | Fecundity Rate Dept 44 | Fecundity Rate Dept 47 | Fecundity Rate Dept 70 | Fecundity Rate Dept 88 | Average Fecundity Rate |
|------|------------------------|------------------------|------------------------|------------------------|------------------------|------------------------|------------------------|------------------------|------------------------|
| 2024 | 2,1066                 | 2,3693                 | 2,4558                 | 2,4434                 | 2,97                   | 2,5519                 | 2,3491                 | 2,1392                 | 2,423                  |
| 2025 | 2,0927                 | 2,3476                 | 2,4261                 | 2,4128                 | 2,9105                 | 2,5103                 | 2,3237                 | 2,1299                 | 2,394                  |
| 2026 | 2,0788                 | 2,3259                 | 2,3964                 | 2,3822                 | 2,851                  | 2,4687                 | 2,2983                 | 2,1206                 | 2,365                  |
| 2027 | 2,0649                 | 2,3042                 | 2,3667                 | 2,3516                 | 2,7915                 | 2,4271                 | 2,2729                 | 2,1113                 | 2,336                  |
| 2028 | 2,051                  | 2,2825                 | 2,337                  | 2,321                  | 2,732                  | 2,3855                 | 2,2475                 | 2,102                  | 2,307                  |
| 2029 | 2,0371                 | 2,2608                 | 2,3073                 | 2,2904                 | 2,6725                 | 2,3439                 | 2,2221                 | 2,0927                 | 2,278                  |
| 2030 | 2,0232                 | 2,2391                 | 2,2776                 | 2,2598                 | 2,613                  | 2,3023                 | 2,1967                 | 2,0834                 | 2,249                  |

† Data of Fertility rate of Colombian National Department of Statistics (DANE) [1] was used to forecast the department's fertility rate from 2005 to 2030. Holt-Winters no seasonal method in EVIEWS 5 (Quantitative Micro Software, LLC) was used to forecast the fertility rate. In the SD model we used data from 2005 to 2030 and the region fertility rate was calculated as the average of all departments' fertility rates.

**Table 20. Fraction of births by departments, body mass index category, and socioeconomic status†**

| Population group |                 | Lower SES (%/year) | Middle SES (%/year) | Higher SES (%/year) | Complete Urban Population (%/year) |
|------------------|-----------------|--------------------|---------------------|---------------------|------------------------------------|
| Department 08    | Not- overweight | 82,14%             | 73,68%              | 72,50%              | 76,87%                             |
|                  | Overweight      | 16,07%             | 18,42%              | 25,00%              | 19,40%                             |
|                  | Obese           | 1,79%              | 7,89%               | 2,50%               | 3,73%                              |
| Department 13    | Not- overweight | 84,00%             | 78,57%              | 70,59%              | 78,57%                             |
|                  | Overweight      | 12,00%             | 14,29%              | 11,76%              | 12,50%                             |
|                  | Obese           | 4,00%              | 7,14%               | 17,65%              | 8,93%                              |
| Department 20    | Not- overweight | 94,59%             | 79,17%              | 73,68%              | 85,00%                             |
|                  | Overweight      | 5,41%              | 20,83%              | 15,79%              | 12,50%                             |
|                  | Obese           | 0,00%              | 0,00%               | 10,53%              | 2,50%                              |
| Department 23    | Not- overweight | 75,00%             | 75,00%              | 55,56%              | 71,11%                             |
|                  | Overweight      | 25,00%             | 25,00%              | 22,22%              | 24,44%                             |
|                  | Obese           | 0,00%              | 0,00%               | 22,22%              | 4,44%                              |
| Department 44    | Not- overweight | 91,49%             | 69,23%              | 71,43%              | 81,61%                             |
|                  | Overweight      | 8,51%              | 23,08%              | 21,43%              | 14,94%                             |
|                  | Obese           | 0,00%              | 7,69%               | 7,14%               | 3,45%                              |
| Department 47    | Not- overweight | 76,47%             | 81,25%              | 90,00%              | 80,00%                             |
|                  | Overweight      | 14,71%             | 12,50%              | 10,00%              | 13,33%                             |
|                  | Obese           | 8,82%              | 6,25%               | 0,00%               | 6,67%                              |
| Department 70    | Not- overweight | 76,00%             | 64,29%              | 84,62%              | 75,32%                             |
|                  | Overweight      | 20,00%             | 14,29%              | 7,69%               | 16,88%                             |
|                  | Obese           | 4,00%              | 21,43%              | 7,69%               | 7,79%                              |
| Department 88    | Not- overweight | 60,00%             | 57,14%              | 60,00%              | 59,09%                             |
|                  | Overweight      | 30,00%             | 28,57%              | 40,00%              | 31,82%                             |
|                  | Obese           | 10,00%             | 14,29%              | 0,00%               | 9,09%                              |

† The fractions of births by each BMI category correspond to the prevalences by BMI category of children aged 0 to 12 months

**Table 21. Prevalent rates of entire population by age group, and body mass index category (Caribe region)**

| Departments  | Age group | Not- overweight in 2005 | Overweight in 2005 | Obese in 2005 | Not- overweight in 2010 | Overweight in 2010 | Obese in 2010 |
|--------------|-----------|-------------------------|--------------------|---------------|-------------------------|--------------------|---------------|
| Department 8 | 0-4       | 0.76748                 | 0.19187            | 0.04065       | 0.71498                 | 0.21824            | 0.06678       |
|              | 5-9       | 0.85308                 | 0.09005            | 0.05687       | 0.80705                 | 0.12584            | 0.06711       |
|              | 10-14     | 0.82573                 | 0.13278            | 0.04149       | 0.78130                 | 0.15693            | 0.06177       |
|              | 15-19     | 0.87772                 | 0.10326            | 0.01902       | 0.81031                 | 0.13260            | 0.05709       |



| Departments          | Age group | Not- overweight in 2005 | Overweight in 2005 | Obese in 2005 | Not- overweight in 2010 | Overweight in 2010 | Obese in 2010 |
|----------------------|-----------|-------------------------|--------------------|---------------|-------------------------|--------------------|---------------|
|                      | 20-24     | 0.78268                 | 0.16469            | 0.05263       | 0.74014                 | 0.20186            | 0.05800       |
|                      | 25-29     | 0.61024                 | 0.27394            | 0.11581       | 0.54717                 | 0.30728            | 0.14555       |
|                      | 30-34     | 0.52577                 | 0.32216            | 0.15206       | 0.43939                 | 0.32727            | 0.23333       |
|                      | 35-39     | 0.50535                 | 0.35027            | 0.14439       | 0.34824                 | 0.40575            | 0.24601       |
|                      | 40-44     | 0.42781                 | 0.37968            | 0.19251       | 0.33918                 | 0.40351            | 0.25731       |
|                      | 45-49     | 0.39308                 | 0.39623            | 0.21069       | 0.33550                 | 0.39739            | 0.26710       |
|                      | 50-54     | 0.37638                 | 0.36162            | 0.26199       | 0.36260                 | 0.40076            | 0.23664       |
|                      | 55-59     | 0.37879                 | 0.41919            | 0.20202       | 0.29126                 | 0.38835            | 0.32039       |
| <b>Department 13</b> | 0-4       | 0.81884                 | 0.14493            | 0.03623       | 0.73684                 | 0.21303            | 0.05013       |
|                      | 5-9       | 0.85821                 | 0.10448            | 0.03731       | 0.82339                 | 0.12615            | 0.05046       |
|                      | 10-14     | 0.84756                 | 0.10976            | 0.04268       | 0.80471                 | 0.15059            | 0.04471       |
|                      | 15-19     | 0.92593                 | 0.06349            | 0.01058       | 0.86768                 | 0.09415            | 0.03817       |
|                      | 20-24     | 0.84444                 | 0.10741            | 0.04815       | 0.75080                 | 0.16294            | 0.08626       |
|                      | 25-29     | 0.70936                 | 0.24631            | 0.04433       | 0.57143                 | 0.31579            | 0.11278       |
|                      | 30-34     | 0.53365                 | 0.33654            | 0.12981       | 0.42023                 | 0.40467            | 0.17510       |
|                      | 35-39     | 0.52083                 | 0.33854            | 0.14063       | 0.42373                 | 0.36441            | 0.21186       |
|                      | 40-44     | 0.49714                 | 0.34857            | 0.15429       | 0.34538                 | 0.40964            | 0.24498       |
|                      | 45-49     | 0.40341                 | 0.41477            | 0.18182       | 0.32105                 | 0.43158            | 0.24737       |
|                      | 50-54     | 0.48148                 | 0.29630            | 0.22222       | 0.36424                 | 0.36424            | 0.27152       |
|                      | 55-59     | 0.37615                 | 0.39450            | 0.22936       | 0.39860                 | 0.32168            | 0.27972       |
| <b>Department 20</b> | 0-4       | 0.82371                 | 0.16109            | 0.01520       | 0.81989                 | 0.13978            | 0.04032       |
|                      | 5-9       | 0.84138                 | 0.11724            | 0.04138       | 0.85286                 | 0.08719            | 0.05995       |
|                      | 10-14     | 0.92308                 | 0.04895            | 0.02797       | 0.82171                 | 0.13953            | 0.03876       |
|                      | 15-19     | 0.85586                 | 0.12613            | 0.01802       | 0.86869                 | 0.10438            | 0.02694       |
|                      | 20-24     | 0.77323                 | 0.18216            | 0.04461       | 0.71041                 | 0.21719            | 0.07240       |
|                      | 25-29     | 0.68085                 | 0.22128            | 0.09787       | 0.53744                 | 0.33480            | 0.12775       |
|                      | 30-34     | 0.51980                 | 0.37624            | 0.10396       | 0.42640                 | 0.39594            | 0.17766       |
|                      | 35-39     | 0.42157                 | 0.39216            | 0.18627       | 0.36898                 | 0.43850            | 0.19251       |
|                      | 40-44     | 0.44375                 | 0.39375            | 0.16250       | 0.35593                 | 0.37853            | 0.26554       |
|                      | 45-49     | 0.32432                 | 0.45270            | 0.22297       | 0.33553                 | 0.44079            | 0.22368       |
|                      | 50-54     | 0.42453                 | 0.34906            | 0.22642       | 0.25806                 | 0.49462            | 0.24731       |
|                      | 55-59     | 0.33333                 | 0.39583            | 0.27083       | 0.25843                 | 0.49438            | 0.24719       |
| <b>Department 23</b> | 0-4       | 0.81609                 | 0.15517            | 0.02874       | 0.76226                 | 0.17736            | 0.06038       |
|                      | 5-9       | 0.84259                 | 0.09259            | 0.06481       | 0.83667                 | 0.13000            | 0.03333       |
|                      | 10-14     | 0.90179                 | 0.08036            | 0.01786       | 0.85855                 | 0.11842            | 0.02303       |
|                      | 15-19     | 0.83007                 | 0.13725            | 0.03268       | 0.85430                 | 0.12252            | 0.02318       |
|                      | 20-24     | 0.80597                 | 0.15920            | 0.03483       | 0.72727                 | 0.20000            | 0.07273       |
|                      | 25-29     | 0.70073                 | 0.22628            | 0.07299       | 0.59574                 | 0.25000            | 0.15426       |
|                      | 30-34     | 0.57516                 | 0.33333            | 0.09150       | 0.48454                 | 0.34021            | 0.17526       |
|                      | 35-39     | 0.51471                 | 0.30882            | 0.17647       | 0.46465                 | 0.36364            | 0.17172       |
|                      | 40-44     | 0.43885                 | 0.39568            | 0.16547       | 0.39560                 | 0.40110            | 0.20330       |
|                      | 45-49     | 0.47059                 | 0.42157            | 0.10784       | 0.30573                 | 0.47134            | 0.22293       |
|                      | 50-54     | 0.32381                 | 0.46667            | 0.20952       | 0.35032                 | 0.34395            | 0.30573       |
|                      | 55-59     | 0.42500                 | 0.36250            | 0.21250       | 0.25000                 | 0.44167            | 0.30833       |
| <b>Department 44</b> | 0-4       | 0.69602                 | 0.24716            | 0.05682       | 0.80919                 | 0.16254            | 0.02827       |
|                      | 5-9       | 0.87283                 | 0.09827            | 0.02890       | 0.85030                 | 0.11976            | 0.02994       |

| Departments      | Age group | Not- overweight<br>in 2005 | Overweight<br>in 2005 | Obese in<br>2005 | Not- overweight<br>in 2010 | Overweight<br>in 2010 | Obese in<br>2010 |
|------------------|-----------|----------------------------|-----------------------|------------------|----------------------------|-----------------------|------------------|
|                  | 10-14     | 0.81955                    | 0.16541               | 0.01504          | 0.87926                    | 0.09598               | 0.02477          |
|                  | 15-19     | 0.90090                    | 0.07658               | 0.02252          | 0.85490                    | 0.11765               | 0.02745          |
|                  | 20-24     | 0.68276                    | 0.25517               | 0.06207          | 0.68306                    | 0.24590               | 0.07104          |
|                  | 25-29     | 0.63300                    | 0.27273               | 0.09428          | 0.49143                    | 0.32571               | 0.18286          |
|                  | 30-34     | 0.46860                    | 0.38164               | 0.14976          | 0.41611                    | 0.28859               | 0.29530          |
|                  | 35-39     | 0.43590                    | 0.39487               | 0.16923          | 0.29167                    | 0.41667               | 0.29167          |
|                  | 40-44     | 0.38191                    | 0.42714               | 0.19095          | 0.39496                    | 0.43697               | 0.16807          |
|                  | 45-49     | 0.31034                    | 0.41379               | 0.27586          | 0.32710                    | 0.44860               | 0.22430          |
|                  | 50-54     | 0.30973                    | 0.42478               | 0.26549          | 0.33684                    | 0.37895               | 0.28421          |
|                  | 55-59     | 0.36170                    | 0.36170               | 0.27660          | 0.31818                    | 0.45455               | 0.22727          |
| Department<br>47 | 0-4       | 0.76817                    | 0.17301               | 0.05882          | 0.80978                    | 0.15217               | 0.03804          |
|                  | 5-9       | 0.83217                    | 0.11888               | 0.04895          | 0.83784                    | 0.10541               | 0.05676          |
|                  | 10-14     | 0.90643                    | 0.08772               | 0.00585          | 0.82840                    | 0.13018               | 0.04142          |
|                  | 15-19     | 0.88950                    | 0.08840               | 0.02210          | 0.83596                    | 0.14511               | 0.01893          |
|                  | 20-24     | 0.80349                    | 0.16594               | 0.03057          | 0.72059                    | 0.18627               | 0.09314          |
|                  | 25-29     | 0.59346                    | 0.29439               | 0.11215          | 0.64135                    | 0.24895               | 0.10970          |
|                  | 30-34     | 0.47953                    | 0.38012               | 0.14035          | 0.51570                    | 0.32735               | 0.15695          |
|                  | 35-39     | 0.45763                    | 0.37853               | 0.16384          | 0.48295                    | 0.32386               | 0.19318          |
|                  | 40-44     | 0.45283                    | 0.36478               | 0.18239          | 0.32222                    | 0.35556               | 0.32222          |
|                  | 45-49     | 0.30081                    | 0.46341               | 0.23577          | 0.35754                    | 0.48603               | 0.15642          |
|                  | 50-54     | 0.41463                    | 0.34959               | 0.23577          | 0.33113                    | 0.47020               | 0.19868          |
|                  | 55-59     | 0.41284                    | 0.31193               | 0.27523          | 0.40164                    | 0.40164               | 0.19672          |
| Department<br>70 | 0-4       | 0.79772                    | 0.15954               | 0.04274          | 0.78961                    | 0.17662               | 0.03377          |
|                  | 5-9       | 0.83077                    | 0.14615               | 0.02308          | 0.86250                    | 0.10750               | 0.03000          |
|                  | 10-14     | 0.89726                    | 0.08904               | 0.01370          | 0.84510                    | 0.10023               | 0.05467          |
|                  | 15-19     | 0.88333                    | 0.08889               | 0.02778          | 0.88636                    | 0.10101               | 0.01263          |
|                  | 20-24     | 0.78889                    | 0.17778               | 0.03333          | 0.80797                    | 0.13406               | 0.05797          |
|                  | 25-29     | 0.66372                    | 0.28319               | 0.05310          | 0.54878                    | 0.32927               | 0.12195          |
|                  | 30-34     | 0.50691                    | 0.36866               | 0.12442          | 0.48927                    | 0.38197               | 0.12876          |
|                  | 35-39     | 0.45050                    | 0.40099               | 0.14851          | 0.43902                    | 0.40650               | 0.15447          |
|                  | 40-44     | 0.42690                    | 0.42105               | 0.15205          | 0.39908                    | 0.43119               | 0.16972          |
|                  | 45-49     | 0.32759                    | 0.37356               | 0.29885          | 0.31148                    | 0.46995               | 0.21858          |
|                  | 50-54     | 0.34043                    | 0.43972               | 0.21986          | 0.38235                    | 0.37059               | 0.24706          |
|                  | 55-59     | 0.43119                    | 0.34862               | 0.22018          | 0.40909                    | 0.36364               | 0.22727          |
| Department<br>88 | 0-4       | 0.65217                    | 0.26087               | 0.08696          | 0.70313                    | 0.20703               | 0.08984          |
|                  | 5-9       | 0.65789                    | 0.23684               | 0.10526          | 0.62030                    | 0.22180               | 0.15789          |
|                  | 10-14     | 0.68293                    | 0.24390               | 0.07317          | 0.64372                    | 0.20648               | 0.14980          |
|                  | 15-19     | 0.65854                    | 0.21951               | 0.12195          | 0.69856                    | 0.17225               | 0.12919          |
|                  | 20-24     | 0.68571                    | 0.21429               | 0.10000          | 0.55729                    | 0.28646               | 0.15625          |
|                  | 25-29     | 0.49275                    | 0.31884               | 0.18841          | 0.40376                    | 0.39906               | 0.19718          |
|                  | 30-34     | 0.32759                    | 0.41379               | 0.25862          | 0.37624                    | 0.36634               | 0.25743          |
|                  | 35-39     | 0.41429                    | 0.34286               | 0.24286          | 0.32979                    | 0.39894               | 0.27128          |
|                  | 40-44     | 0.33333                    | 0.37879               | 0.28788          | 0.27160                    | 0.45679               | 0.27160          |
|                  | 45-49     | 0.31746                    | 0.46032               | 0.22222          | 0.23605                    | 0.47210               | 0.29185          |
|                  | 50-54     | 0.32759                    | 0.31034               | 0.36207          | 0.27841                    | 0.42045               | 0.30114          |

| Departments | Age group | Not- overweight in 2005 | Overweight in 2005 | Obese in 2005 | Not- overweight in 2010 | Overweight in 2010 | Obese in 2010 |
|-------------|-----------|-------------------------|--------------------|---------------|-------------------------|--------------------|---------------|
|             | 55-59     | 0.23529                 | 0.52941            | 0.23529       | 0.20611                 | 0.49618            | 0.29771       |

**Table 22. Prevalent rates of lower socioeconomic status population by age group, and body mass index category (Caribe region)**

| Departments   | Age group | Not- overweight in 2005 | Overweight in 2005 | Obese in 2005 | Not- overweight in 2010 | Overweight in 2010 | Obese in 2010 |
|---------------|-----------|-------------------------|--------------------|---------------|-------------------------|--------------------|---------------|
| Department 8  | 0-4       | 0.76748                 | 0.19187            | 0.04065       | 0.74806                 | 0.20930            | 0.04264       |
|               | 5-9       | 0.85308                 | 0.09005            | 0.05687       | 0.87868                 | 0.08824            | 0.03309       |
|               | 10-14     | 0.82573                 | 0.13278            | 0.04149       | 0.84135                 | 0.12500            | 0.03365       |
|               | 15-19     | 0.87772                 | 0.10326            | 0.01902       | 0.89418                 | 0.07937            | 0.02646       |
|               | 20-24     | 0.78268                 | 0.16469            | 0.05263       | 0.77852                 | 0.16779            | 0.05369       |
|               | 25-29     | 0.61024                 | 0.27394            | 0.11581       | 0.58824                 | 0.29412            | 0.11765       |
|               | 30-34     | 0.52577                 | 0.32216            | 0.15206       | 0.48673                 | 0.28319            | 0.23009       |
|               | 35-39     | 0.50535                 | 0.35027            | 0.14439       | 0.41414                 | 0.39394            | 0.19192       |
|               | 40-44     | 0.42781                 | 0.37968            | 0.19251       | 0.41525                 | 0.33051            | 0.25424       |
|               | 45-49     | 0.39308                 | 0.39623            | 0.21069       | 0.44000                 | 0.34000            | 0.22000       |
|               | 50-54     | 0.37638                 | 0.36162            | 0.26199       | 0.48684                 | 0.31579            | 0.19737       |
| 55-59         | 0.37879   | 0.41919                 | 0.20202            | 0.38776       | 0.30612                 | 0.30612            |               |
| Department 13 | 0-4       | 0.86726                 | 0.11504            | 0.01770       | 0.74359                 | 0.20000            | 0.05641       |
|               | 5-9       | 0.85714                 | 0.11111            | 0.03175       | 0.87719                 | 0.08333            | 0.03947       |
|               | 10-14     | 0.88571                 | 0.08571            | 0.02857       | 0.83486                 | 0.14679            | 0.01835       |
|               | 15-19     | 0.96721                 | 0.01639            | 0.01639       | 0.88108                 | 0.09189            | 0.02703       |
|               | 20-24     | 0.79787                 | 0.12766            | 0.07447       | 0.77863                 | 0.15267            | 0.06870       |
|               | 25-29     | 0.74286                 | 0.20000            | 0.05714       | 0.62712                 | 0.27119            | 0.10169       |
|               | 30-34     | 0.59155                 | 0.28169            | 0.12676       | 0.34211                 | 0.50877            | 0.14912       |
|               | 35-39     | 0.57143                 | 0.34921            | 0.07937       | 0.50000                 | 0.29167            | 0.20833       |
|               | 40-44     | 0.57143                 | 0.28571            | 0.14286       | 0.36082                 | 0.35052            | 0.28866       |
|               | 45-49     | 0.50000                 | 0.38462            | 0.11538       | 0.38356                 | 0.36986            | 0.24658       |
|               | 50-54     | 0.71795                 | 0.25641            | 0.02564       | 0.34211                 | 0.34211            | 0.31579       |
| 55-59         | 0.58333   | 0.33333                 | 0.08333            | 0.48936       | 0.21277                 | 0.29787            |               |
| Department 20 | 0-4       | 0.87356                 | 0.12069            | 0.00575       | 0.83553                 | 0.14474            | 0.01974       |
|               | 5-9       | 0.89063                 | 0.09375            | 0.01563       | 0.92994                 | 0.05732            | 0.01274       |
|               | 10-14     | 0.95238                 | 0.03175            | 0.01587       | 0.83212                 | 0.14599            | 0.02190       |
|               | 15-19     | 0.86250                 | 0.11250            | 0.02500       | 0.89899                 | 0.08081            | 0.02020       |
|               | 20-24     | 0.78689                 | 0.16393            | 0.04918       | 0.80000                 | 0.15385            | 0.04615       |
|               | 25-29     | 0.69565                 | 0.20652            | 0.09783       | 0.50000                 | 0.34375            | 0.15625       |
|               | 30-34     | 0.63953                 | 0.25581            | 0.10465       | 0.51852                 | 0.29630            | 0.18519       |
|               | 35-39     | 0.48810                 | 0.36905            | 0.14286       | 0.49123                 | 0.33333            | 0.17544       |
|               | 40-44     | 0.56522                 | 0.34783            | 0.08696       | 0.39583                 | 0.43750            | 0.16667       |
|               | 45-49     | 0.36735                 | 0.53061            | 0.10204       | 0.36957                 | 0.41304            | 0.21739       |
|               | 50-54     | 0.55882                 | 0.35294            | 0.08824       | 0.47059                 | 0.47059            | 0.05882       |
| 55-59         | 0.58333   | 0.20833                 | 0.20833            | 0.33333       | 0.51852                 | 0.14815            |               |
| Department 23 | 0-4       | 0.83333                 | 0.14815            | 0.01852       | 0.75490                 | 0.19118            | 0.05392       |
|               | 5-9       | 0.85714                 | 0.10000            | 0.04286       | 0.85652                 | 0.11304            | 0.03043       |
|               | 10-14     | 0.95161                 | 0.03226            | 0.01613       | 0.87500                 | 0.10776            | 0.01724       |

| Departments   | Age group     | Not- overweight in 2005 | Overweight in 2005 | Obese in 2005 | Not- overweight in 2010 | Overweight in 2010 | Obese in 2010 |
|---------------|---------------|-------------------------|--------------------|---------------|-------------------------|--------------------|---------------|
|               | 15-19         | 0.88158                 | 0.11842            | 0.00000       | 0.87019                 | 0.10096            | 0.02885       |
|               | 20-24         | 0.83333                 | 0.13725            | 0.02941       | 0.75862                 | 0.17241            | 0.06897       |
|               | 25-29         | 0.71429                 | 0.25714            | 0.02857       | 0.60000                 | 0.26667            | 0.13333       |
|               | 30-34         | 0.56790                 | 0.33333            | 0.09877       | 0.50000                 | 0.32394            | 0.17606       |
|               | 35-39         | 0.58904                 | 0.24658            | 0.16438       | 0.46575                 | 0.36986            | 0.16438       |
|               | 40-44         | 0.46032                 | 0.28571            | 0.25397       | 0.38281                 | 0.39844            | 0.21875       |
|               | 45-49         | 0.54000                 | 0.36000            | 0.10000       | 0.37374                 | 0.40404            | 0.22222       |
|               | 50-54         | 0.44828                 | 0.36207            | 0.18966       | 0.39048                 | 0.36190            | 0.24762       |
|               | 55-59         | 0.61765                 | 0.29412            | 0.08824       | 0.35526                 | 0.44737            | 0.19737       |
| Department 44 | 0-4           | 0.72872                 | 0.22340            | 0.04787       | 0.80392                 | 0.18301            | 0.01307       |
|               | 5-9           | 0.93204                 | 0.06796            | 0.00000       | 0.90643                 | 0.08187            | 0.01170       |
|               | 10-14         | 0.82540                 | 0.17460            | 0.00000       | 0.91824                 | 0.08176            | 0.00000       |
|               | 15-19         | 0.88776                 | 0.09184            | 0.02041       | 0.89063                 | 0.09375            | 0.01563       |
|               | 20-24         | 0.74167                 | 0.20833            | 0.05000       | 0.69663                 | 0.23596            | 0.06742       |
|               | 25-29         | 0.66906                 | 0.25180            | 0.07914       | 0.52857                 | 0.28571            | 0.18571       |
|               | 30-34         | 0.54023                 | 0.27586            | 0.18391       | 0.39706                 | 0.32353            | 0.27941       |
|               | 35-39         | 0.40789                 | 0.43421            | 0.15789       | 0.29231                 | 0.38462            | 0.32308       |
|               | 40-44         | 0.50000                 | 0.41429            | 0.08571       | 0.41176                 | 0.49020            | 0.09804       |
|               | 45-49         | 0.45652                 | 0.26087            | 0.28261       | 0.43590                 | 0.30769            | 0.25641       |
|               | 50-54         | 0.43590                 | 0.35897            | 0.20513       | 0.39024                 | 0.41463            | 0.19512       |
|               | 55-59         | 0.54545                 | 0.24242            | 0.21212       | 0.42857                 | 0.42857            | 0.14286       |
|               | Department 47 | 0-4                     | 0.78344            | 0.17197       | 0.04459                 | 0.81304            | 0.15217       |
| 5-9           |               | 0.91892                 | 0.08108            | 0.00000       | 0.89593                 | 0.07692            | 0.02715       |
| 10-14         |               | 0.90588                 | 0.08235            | 0.01176       | 0.87500                 | 0.10500            | 0.02000       |
| 15-19         |               | 0.93617                 | 0.05319            | 0.01064       | 0.84884                 | 0.13372            | 0.01744       |
| 20-24         |               | 0.89423                 | 0.10577            | 0.00000       | 0.69298                 | 0.20175            | 0.10526       |
| 25-29         |               | 0.62791                 | 0.32558            | 0.04651       | 0.70161                 | 0.19355            | 0.10484       |
| 30-34         |               | 0.53165                 | 0.34177            | 0.12658       | 0.58955                 | 0.28358            | 0.12687       |
| 35-39         |               | 0.46479                 | 0.35211            | 0.18310       | 0.50000                 | 0.32955            | 0.17045       |
| 40-44         |               | 0.50000                 | 0.36538            | 0.13462       | 0.38372                 | 0.34884            | 0.26744       |
| 45-49         |               | 0.45098                 | 0.41176            | 0.13725       | 0.38554                 | 0.43373            | 0.18072       |
| 50-54         |               | 0.46667                 | 0.35000            | 0.18333       | 0.48387                 | 0.40323            | 0.11290       |
| 55-59         |               | 0.51163                 | 0.27907            | 0.20930       | 0.52941                 | 0.35294            | 0.11765       |
| Department 70 |               | 0-4                     | 0.79024            | 0.19024       | 0.01951                 | 0.76860            | 0.19835       |
|               | 5-9           | 0.92308                 | 0.06154            | 0.01538       | 0.89362                 | 0.07660            | 0.02979       |
|               | 10-14         | 0.96053                 | 0.03947            | 0.00000       | 0.87600                 | 0.08000            | 0.04400       |
|               | 15-19         | 0.89691                 | 0.08247            | 0.02062       | 0.89545                 | 0.10455            | 0.00000       |
|               | 20-24         | 0.78632                 | 0.15385            | 0.05983       | 0.82051                 | 0.11538            | 0.06410       |
|               | 25-29         | 0.73737                 | 0.24242            | 0.02020       | 0.61029                 | 0.30882            | 0.08088       |
|               | 30-34         | 0.52727                 | 0.39091            | 0.08182       | 0.48276                 | 0.36207            | 0.15517       |
|               | 35-39         | 0.50000                 | 0.39024            | 0.10976       | 0.46465                 | 0.39394            | 0.14141       |
|               | 40-44         | 0.50000                 | 0.40278            | 0.09722       | 0.43860                 | 0.43860            | 0.12281       |
|               | 45-49         | 0.36709                 | 0.43038            | 0.20253       | 0.37500                 | 0.43182            | 0.19318       |
|               | 50-54         | 0.41176                 | 0.37255            | 0.21569       | 0.40789                 | 0.38158            | 0.21053       |
|               | 55-59         | 0.50000                 | 0.28261            | 0.21739       | 0.53448                 | 0.25862            | 0.20690       |

| Departments   | Age group | Not- overweight in 2005 | Overweight in 2005 | Obese in 2005 | Not- overweight in 2010 | Overweight in 2010 | Obese in 2010 |
|---------------|-----------|-------------------------|--------------------|---------------|-------------------------|--------------------|---------------|
| Department 88 | 0-4       | 0.69697                 | 0.27273            | 0.03030       | 0.71560                 | 0.19725            | 0.08716       |
|               | 5-9       | 0.88235                 | 0.05882            | 0.05882       | 0.62762                 | 0.22176            | 0.15063       |
|               | 10-14     | 0.76471                 | 0.17647            | 0.05882       | 0.65625                 | 0.19643            | 0.14732       |
|               | 15-19     | 0.73333                 | 0.26667            | 0.00000       | 0.70899                 | 0.17989            | 0.11111       |
|               | 20-24     | 0.69231                 | 0.23077            | 0.07692       | 0.56742                 | 0.27528            | 0.15730       |
|               | 25-29     | 0.78947                 | 0.15789            | 0.05263       | 0.37989                 | 0.41341            | 0.20670       |
|               | 30-34     | 0.61538                 | 0.23077            | 0.15385       | 0.37423                 | 0.34356            | 0.28221       |
|               | 35-39     | 0.61111                 | 0.22222            | 0.16667       | 0.33951                 | 0.40123            | 0.25926       |
|               | 40-44     | 0.29412                 | 0.35294            | 0.35294       | 0.26147                 | 0.45872            | 0.27982       |
|               | 45-49     | 0.44444                 | 0.27778            | 0.27778       | 0.22335                 | 0.48223            | 0.29442       |
|               | 50-54     | 0.50000                 | 0.10000            | 0.40000       | 0.30519                 | 0.40260            | 0.29221       |
| 55-59         | 0.33333   | 0.50000                 | 0.16667            | 0.21495       | 0.49533                 | 0.28972            |               |

**Table 23. Prevalent rates of middle socioeconomic status population by age group, and body mass index category (Caribe region)**

| Departments   | Age group | Not- overweight in 2005 | Overweight in 2005 | Obese in 2005 | Not- overweight in 2010 | Overweight in 2010 | Obese in 2010 |
|---------------|-----------|-------------------------|--------------------|---------------|-------------------------|--------------------|---------------|
| Department 8  | 0-4       | 0.78824                 | 0.17059            | 0.04118       | 0.75723                 | 0.17919            | 0.06358       |
|               | 5-9       | 0.89655                 | 0.08621            | 0.01724       | 0.80986                 | 0.13380            | 0.05634       |
|               | 10-14     | 0.89041                 | 0.08219            | 0.02740       | 0.76774                 | 0.19355            | 0.03871       |
|               | 15-19     | 0.86813                 | 0.12088            | 0.01099       | 0.76978                 | 0.14388            | 0.08633       |
|               | 20-24     | 0.81065                 | 0.12426            | 0.06509       | 0.73034                 | 0.22472            | 0.04494       |
|               | 25-29     | 0.63830                 | 0.24823            | 0.11348       | 0.57143                 | 0.27473            | 0.15385       |
|               | 30-34     | 0.53846                 | 0.36538            | 0.09615       | 0.46392                 | 0.31959            | 0.21649       |
|               | 35-39     | 0.56075                 | 0.30841            | 0.13084       | 0.29487                 | 0.39744            | 0.30769       |
|               | 40-44     | 0.35238                 | 0.45714            | 0.19048       | 0.27632                 | 0.51316            | 0.21053       |
|               | 45-49     | 0.37374                 | 0.45455            | 0.17172       | 0.28767                 | 0.39726            | 0.31507       |
|               | 50-54     | 0.37143                 | 0.37143            | 0.25714       | 0.45455                 | 0.39394            | 0.15152       |
| 55-59         | 0.54000   | 0.32000                 | 0.14000            | 0.41176       | 0.35294                 | 0.23529            |               |
| Department 13 | 0-4       | 0.80000                 | 0.18667            | 0.01333       | 0.77320                 | 0.19588            | 0.03093       |
|               | 5-9       | 0.90000                 | 0.06667            | 0.03333       | 0.80851                 | 0.17021            | 0.02128       |
|               | 10-14     | 0.87500                 | 0.09375            | 0.03125       | 0.75904                 | 0.21687            | 0.02410       |
|               | 15-19     | 1.00000                 | 0.00000            | 0.00000       | 0.88235                 | 0.09412            | 0.02353       |
|               | 20-24     | 0.84211                 | 0.12281            | 0.03509       | 0.74603                 | 0.15873            | 0.09524       |
|               | 25-29     | 0.72340                 | 0.25532            | 0.02128       | 0.58182                 | 0.30909            | 0.10909       |
|               | 30-34     | 0.42857                 | 0.44898            | 0.12245       | 0.51724                 | 0.29310            | 0.18966       |
|               | 35-39     | 0.49020                 | 0.29412            | 0.21569       | 0.34426                 | 0.44262            | 0.21311       |
|               | 40-44     | 0.55556                 | 0.25000            | 0.19444       | 0.37288                 | 0.42373            | 0.20339       |
|               | 45-49     | 0.48148                 | 0.44444            | 0.07407       | 0.32353                 | 0.44118            | 0.23529       |
|               | 50-54     | 0.40741                 | 0.29630            | 0.29630       | 0.62069                 | 0.20690            | 0.17241       |
| 55-59         | 0.25000   | 0.50000                 | 0.25000            | 0.40000       | 0.36667                 | 0.23333            |               |
| Department 20 | 0-4       | 0.76667                 | 0.22222            | 0.01111       | 0.81169                 | 0.14286            | 0.04545       |
|               | 5-9       | 0.81818                 | 0.12727            | 0.05455       | 0.86364                 | 0.07576            | 0.06061       |
|               | 10-14     | 0.90566                 | 0.07547            | 0.01887       | 0.85616                 | 0.10274            | 0.04110       |
|               | 15-19     | 0.84211                 | 0.14474            | 0.01316       | 0.86923                 | 0.10769            | 0.02308       |
|               | 20-24     | 0.77333                 | 0.18667            | 0.04000       | 0.70330                 | 0.23077            | 0.06593       |

| Departments          | Age group | Not- overweight in 2005 | Overweight in 2005 | Obese in 2005 | Not- overweight in 2010 | Overweight in 2010 | Obese in 2010 |
|----------------------|-----------|-------------------------|--------------------|---------------|-------------------------|--------------------|---------------|
|                      | 25-29     | 0.66234                 | 0.24675            | 0.09091       | 0.61053                 | 0.28421            | 0.10526       |
|                      | 30-34     | 0.42373                 | 0.45763            | 0.11864       | 0.44048                 | 0.42857            | 0.13095       |
|                      | 35-39     | 0.44776                 | 0.37313            | 0.17910       | 0.36000                 | 0.41333            | 0.22667       |
|                      | 40-44     | 0.43636                 | 0.38182            | 0.18182       | 0.33333                 | 0.35556            | 0.31111       |
|                      | 45-49     | 0.32692                 | 0.42308            | 0.25000       | 0.33929                 | 0.42857            | 0.23214       |
|                      | 50-54     | 0.43590                 | 0.38462            | 0.17949       | 0.24242                 | 0.54545            | 0.21212       |
|                      | 55-59     | 0.32500                 | 0.40000            | 0.27500       | 0.22727                 | 0.45455            | 0.31818       |
| <b>Department 23</b> | 0-4       | 0.81579                 | 0.15789            | 0.02632       | 0.75000                 | 0.18750            | 0.06250       |
|                      | 5-9       | 0.80000                 | 0.08000            | 0.12000       | 0.85714                 | 0.11429            | 0.02857       |
|                      | 10-14     | 0.83871                 | 0.12903            | 0.03226       | 0.85000                 | 0.10000            | 0.05000       |
|                      | 15-19     | 0.77143                 | 0.11429            | 0.11429       | 0.89362                 | 0.08511            | 0.02128       |
|                      | 20-24     | 0.80952                 | 0.19048            | 0.00000       | 0.71429                 | 0.20000            | 0.08571       |
|                      | 25-29     | 0.67568                 | 0.16216            | 0.16216       | 0.75000                 | 0.08333            | 0.16667       |
|                      | 30-34     | 0.64865                 | 0.27027            | 0.08108       | 0.41667                 | 0.37500            | 0.20833       |
|                      | 35-39     | 0.51613                 | 0.38710            | 0.09677       | 0.52000                 | 0.36000            | 0.12000       |
|                      | 40-44     | 0.35714                 | 0.50000            | 0.14286       | 0.43333                 | 0.40000            | 0.16667       |
|                      | 45-49     | 0.42105                 | 0.47368            | 0.10526       | 0.21739                 | 0.52174            | 0.26087       |
|                      | 50-54     | 0.33333                 | 0.46667            | 0.20000       | 0.45833                 | 0.25000            | 0.29167       |
|                      | 55-59     | 0.25000                 | 0.50000            | 0.25000       | 0.05556                 | 0.38889            | 0.55556       |
| <b>Department 44</b> | 0-4       | 0.67677                 | 0.27273            | 0.05051       | 0.87952                 | 0.07229            | 0.04819       |
|                      | 5-9       | 0.88372                 | 0.06977            | 0.04651       | 0.85047                 | 0.13084            | 0.01869       |
|                      | 10-14     | 0.88235                 | 0.11765            | 0.00000       | 0.87619                 | 0.10476            | 0.01905       |
|                      | 15-19     | 0.91781                 | 0.04110            | 0.04110       | 0.83784                 | 0.12162            | 0.04054       |
|                      | 20-24     | 0.70588                 | 0.25490            | 0.03922       | 0.70968                 | 0.20968            | 0.08065       |
|                      | 25-29     | 0.61628                 | 0.25581            | 0.12791       | 0.51667                 | 0.35000            | 0.13333       |
|                      | 30-34     | 0.50000                 | 0.39394            | 0.10606       | 0.46000                 | 0.26000            | 0.28000       |
|                      | 35-39     | 0.40580                 | 0.40580            | 0.18841       | 0.33962                 | 0.37736            | 0.28302       |
|                      | 40-44     | 0.37705                 | 0.42623            | 0.19672       | 0.34884                 | 0.44186            | 0.20930       |
|                      | 45-49     | 0.25490                 | 0.41176            | 0.33333       | 0.27907                 | 0.48837            | 0.23256       |
|                      | 50-54     | 0.28205                 | 0.48718            | 0.23077       | 0.42308                 | 0.19231            | 0.38462       |
|                      | 55-59     | 0.34375                 | 0.40625            | 0.25000       | 0.35294                 | 0.35294            | 0.29412       |
| <b>Department 47</b> | 0-4       | 0.74359                 | 0.16667            | 0.08974       | 0.87640                 | 0.11236            | 0.01124       |
|                      | 5-9       | 0.81395                 | 0.09302            | 0.09302       | 0.86517                 | 0.12360            | 0.01124       |
|                      | 10-14     | 0.91667                 | 0.08333            | 0.00000       | 0.86486                 | 0.12162            | 0.01351       |
|                      | 15-19     | 0.81818                 | 0.13636            | 0.04545       | 0.87952                 | 0.12048            | 0.00000       |
|                      | 20-24     | 0.76667                 | 0.21667            | 0.01667       | 0.81132                 | 0.15094            | 0.03774       |
|                      | 25-29     | 0.58000                 | 0.24000            | 0.18000       | 0.63636                 | 0.30303            | 0.06061       |
|                      | 30-34     | 0.45098                 | 0.45098            | 0.09804       | 0.47170                 | 0.33962            | 0.18868       |
|                      | 35-39     | 0.40816                 | 0.38776            | 0.20408       | 0.53333                 | 0.26667            | 0.20000       |
|                      | 40-44     | 0.43860                 | 0.38596            | 0.17544       | 0.34694                 | 0.30612            | 0.34694       |
|                      | 45-49     | 0.26667                 | 0.50000            | 0.23333       | 0.30189                 | 0.58491            | 0.11321       |
|                      | 50-54     | 0.38889                 | 0.27778            | 0.33333       | 0.28261                 | 0.45652            | 0.26087       |
|                      | 55-59     | 0.33333                 | 0.33333            | 0.33333       | 0.37500                 | 0.42500            | 0.20000       |
| <b>Department 70</b> | 0-4       | 0.78689                 | 0.14754            | 0.06557       | 0.83544                 | 0.12658            | 0.03797       |
|                      | 5-9       | 0.82857                 | 0.14286            | 0.02857       | 0.87805                 | 0.09756            | 0.02439       |

| Departments   | Age group | Not- overweight in 2005 | Overweight in 2005 | Obese in 2005 | Not- overweight in 2010 | Overweight in 2010 | Obese in 2010 |
|---------------|-----------|-------------------------|--------------------|---------------|-------------------------|--------------------|---------------|
|               | 10-14     | 0.85714                 | 0.14286            | 0.00000       | 0.87629                 | 0.12371            | 0.00000       |
|               | 15-19     | 0.87179                 | 0.07692            | 0.05128       | 0.93421                 | 0.05263            | 0.01316       |
|               | 20-24     | 0.88000                 | 0.12000            | 0.00000       | 0.81538                 | 0.15385            | 0.03077       |
|               | 25-29     | 0.65517                 | 0.29310            | 0.05172       | 0.57407                 | 0.25926            | 0.16667       |
|               | 30-34     | 0.48148                 | 0.27778            | 0.24074       | 0.47458                 | 0.45763            | 0.06780       |
|               | 35-39     | 0.47059                 | 0.41176            | 0.11765       | 0.47222                 | 0.34722            | 0.18056       |
|               | 40-44     | 0.40000                 | 0.45000            | 0.15000       | 0.48889                 | 0.31111            | 0.20000       |
|               | 45-49     | 0.38776                 | 0.28571            | 0.32653       | 0.28261                 | 0.47826            | 0.23913       |
|               | 50-54     | 0.45652                 | 0.36957            | 0.17391       | 0.50000                 | 0.29412            | 0.20588       |
|               | 55-59     | 0.55556                 | 0.16667            | 0.27778       | 0.45161                 | 0.29032            | 0.25806       |
| Department 88 | 0-4       | 0.48387                 | 0.35484            | 0.16129       | 0.69231                 | 0.23077            | 0.07692       |
|               | 5-9       | 0.60000                 | 0.20000            | 0.20000       | 0.59091                 | 0.18182            | 0.22727       |
|               | 10-14     | 0.46154                 | 0.38462            | 0.15385       | 0.52941                 | 0.29412            | 0.17647       |
|               | 15-19     | 0.58333                 | 0.08333            | 0.33333       | 0.78571                 | 0.00000            | 0.21429       |
|               | 20-24     | 0.73913                 | 0.17391            | 0.08696       | 0.50000                 | 0.50000            | 0.00000       |
|               | 25-29     | 0.30769                 | 0.53846            | 0.15385       | 0.54167                 | 0.33333            | 0.12500       |
|               | 30-34     | 0.36364                 | 0.40909            | 0.22727       | 0.42308                 | 0.46154            | 0.11538       |
|               | 35-39     | 0.35714                 | 0.32143            | 0.32143       | 0.31579                 | 0.36842            | 0.31579       |
|               | 40-44     | 0.40000                 | 0.40000            | 0.20000       | 0.35294                 | 0.41176            | 0.23529       |
|               | 45-49     | 0.15789                 | 0.52632            | 0.31579       | 0.32000                 | 0.36000            | 0.32000       |
|               | 50-54     | 0.34483                 | 0.27586            | 0.37931       | 0.07692                 | 0.53846            | 0.38462       |
|               | 55-59     | 0.00000                 | 0.72727            | 0.27273       | 0.22222                 | 0.38889            | 0.38889       |

**Table 24. Prevalent rates of higher socioeconomic status population by age group, and body mass index category (Caribe region)**

| Departments   | Age group | Not- overweight in 2005 | Overweight in 2005 | Obese in 2005 | Not- overweight in 2010 | Overweight in 2010 | Obese in 2010 |
|---------------|-----------|-------------------------|--------------------|---------------|-------------------------|--------------------|---------------|
| Department 8  | 0-4       | 0.72826                 | 0.20652            | 0.06522       | 0.62842                 | 0.26776            | 0.10383       |
|               | 5-9       | 0.74390                 | 0.13415            | 0.12195       | 0.69780                 | 0.17582            | 0.12637       |
|               | 10-14     | 0.68132                 | 0.24176            | 0.07692       | 0.73729                 | 0.16102            | 0.10169       |
|               | 15-19     | 0.81379                 | 0.14483            | 0.04138       | 0.76279                 | 0.17209            | 0.06512       |
|               | 20-24     | 0.72961                 | 0.20601            | 0.06438       | 0.71503                 | 0.21762            | 0.06736       |
|               | 25-29     | 0.60989                 | 0.28022            | 0.10989       | 0.49306                 | 0.34028            | 0.16667       |
|               | 30-34     | 0.41808                 | 0.36158            | 0.22034       | 0.37500                 | 0.37500            | 0.25000       |
|               | 35-39     | 0.40000                 | 0.42581            | 0.17419       | 0.33088                 | 0.41912            | 0.25000       |
|               | 40-44     | 0.35526                 | 0.39474            | 0.25000       | 0.31081                 | 0.40541            | 0.28378       |
|               | 45-49     | 0.36301                 | 0.41781            | 0.21918       | 0.28358                 | 0.44030            | 0.27612       |
|               | 50-54     | 0.25833                 | 0.42500            | 0.31667       | 0.23333                 | 0.45833            | 0.30833       |
|               | 55-59     | 0.23762                 | 0.53465            | 0.22772       | 0.18868                 | 0.44340            | 0.36792       |
| Department 13 | 0-4       | 0.77273                 | 0.14773            | 0.07955       | 0.69159                 | 0.25234            | 0.05607       |
|               | 5-9       | 0.82927                 | 0.12195            | 0.04878       | 0.72807                 | 0.17544            | 0.09649       |
|               | 10-14     | 0.79032                 | 0.14516            | 0.06452       | 0.78226                 | 0.11290            | 0.10484       |
|               | 15-19     | 0.86364                 | 0.12500            | 0.01136       | 0.83740                 | 0.09756            | 0.06504       |
|               | 20-24     | 0.88235                 | 0.08403            | 0.03361       | 0.72269                 | 0.17647            | 0.10084       |

| Departments      | Age group        | Not- overweight<br>in 2005 | Overweight<br>in 2005 | Obese in<br>2005 | Not- overweight<br>in 2010 | Overweight<br>in 2010 | Obese in<br>2010 |
|------------------|------------------|----------------------------|-----------------------|------------------|----------------------------|-----------------------|------------------|
|                  | 25-29            | 0.67442                    | 0.27907               | 0.04651          | 0.49462                    | 0.37634               | 0.12903          |
|                  | 30-34            | 0.54545                    | 0.31818               | 0.13636          | 0.45882                    | 0.34118               | 0.20000          |
|                  | 35-39            | 0.50000                    | 0.35897               | 0.14103          | 0.39241                    | 0.39241               | 0.21519          |
|                  | 40-44            | 0.39130                    | 0.46377               | 0.14493          | 0.31183                    | 0.46237               | 0.22581          |
|                  | 45-49            | 0.32990                    | 0.42268               | 0.24742          | 0.26506                    | 0.48193               | 0.25301          |
|                  | 50-54            | 0.37681                    | 0.31884               | 0.30435          | 0.23913                    | 0.50000               | 0.26087          |
|                  | 55-59            | 0.28302                    | 0.39623               | 0.32075          | 0.33333                    | 0.37879               | 0.28788          |
| Department<br>20 | 0-4              | 0.76923                    | 0.18462               | 0.04615          | 0.80303                    | 0.12121               | 0.07576          |
|                  | 5-9              | 0.76923                    | 0.15385               | 0.07692          | 0.67949                    | 0.16667               | 0.15385          |
|                  | 10-14            | 0.88889                    | 0.03704               | 0.07407          | 0.75962                    | 0.18269               | 0.05769          |
|                  | 15-19            | 0.86364                    | 0.12121               | 0.01515          | 0.82353                    | 0.13235               | 0.04412          |
|                  | 20-24            | 0.75000                    | 0.20833               | 0.04167          | 0.63077                    | 0.26154               | 0.10769          |
|                  | 25-29            | 0.68182                    | 0.21212               | 0.10606          | 0.47059                    | 0.39706               | 0.13235          |
|                  | 30-34            | 0.43860                    | 0.47368               | 0.08772          | 0.32203                    | 0.44068               | 0.23729          |
|                  | 35-39            | 0.28302                    | 0.45283               | 0.26415          | 0.25455                    | 0.58182               | 0.16364          |
|                  | 40-44            | 0.35593                    | 0.44068               | 0.20339          | 0.35897                    | 0.35897               | 0.28205          |
|                  | 45-49            | 0.27660                    | 0.40426               | 0.31915          | 0.30000                    | 0.48000               | 0.22000          |
|                  | 50-54            | 0.27273                    | 0.30303               | 0.42424          | 0.18605                    | 0.46512               | 0.34884          |
|                  | 55-59            | 0.15625                    | 0.53125               | 0.31250          | 0.22500                    | 0.50000               | 0.27500          |
|                  | Department<br>23 | 0-4                        | 0.75000               | 0.17857          | 0.07143                    | 0.82759               | 0.06897          |
| 5-9              |                  | 0.84615                    | 0.07692               | 0.07692          | 0.68571                    | 0.25714               | 0.05714          |
| 10-14            |                  | 0.84211                    | 0.15789               | 0.00000          | 0.75000                    | 0.21875               | 0.03125          |
| 15-19            |                  | 0.78571                    | 0.19048               | 0.02381          | 0.74468                    | 0.25532               | 0.00000          |
| 20-24            |                  | 0.75439                    | 0.17544               | 0.07018          | 0.62500                    | 0.30000               | 0.07500          |
| 25-29            |                  | 0.70000                    | 0.23333               | 0.06667          | 0.50000                    | 0.29545               | 0.20455          |
| 30-34            |                  | 0.51429                    | 0.40000               | 0.08571          | 0.46429                    | 0.39286               | 0.14286          |
| 35-39            |                  | 0.34375                    | 0.37500               | 0.28125          | 0.40741                    | 0.33333               | 0.25926          |
| 40-44            |                  | 0.50000                    | 0.47059               | 0.02941          | 0.41667                    | 0.41667               | 0.16667          |
| 45-49            |                  | 0.39394                    | 0.48485               | 0.12121          | 0.17143                    | 0.62857               | 0.20000          |
| 50-54            |                  | 0.09375                    | 0.65625               | 0.25000          | 0.10714                    | 0.35714               | 0.53571          |
| 55-59            |                  | 0.30769                    | 0.34615               | 0.34615          | 0.07692                    | 0.46154               | 0.46154          |
| Department<br>44 |                  | 0-4                        | 0.63077               | 0.27692          | 0.09231                    | 0.70213               | 0.25532          |
|                  | 5-9              | 0.62963                    | 0.25926               | 0.11111          | 0.67857                    | 0.21429               | 0.10714          |
|                  | 10-14            | 0.75000                    | 0.19444               | 0.05556          | 0.77966                    | 0.11864               | 0.10169          |
|                  | 15-19            | 0.90196                    | 0.09804               | 0.00000          | 0.79245                    | 0.16981               | 0.03774          |
|                  | 20-24            | 0.54412                    | 0.33824               | 0.11765          | 0.59375                    | 0.34375               | 0.06250          |
|                  | 25-29            | 0.58333                    | 0.33333               | 0.08333          | 0.40000                    | 0.35556               | 0.24444          |
|                  | 30-34            | 0.31481                    | 0.53704               | 0.14815          | 0.38710                    | 0.25806               | 0.35484          |
|                  | 35-39            | 0.52000                    | 0.32000               | 0.16000          | 0.19231                    | 0.57692               | 0.23077          |
|                  | 40-44            | 0.26471                    | 0.44118               | 0.29412          | 0.44000                    | 0.32000               | 0.24000          |
|                  | 45-49            | 0.22917                    | 0.56250               | 0.20833          | 0.24000                    | 0.60000               | 0.16000          |
|                  | 50-54            | 0.20000                    | 0.42857               | 0.37143          | 0.17857                    | 0.50000               | 0.32143          |
|                  | 55-59            | 0.17241                    | 0.44828               | 0.37931          | 0.14286                    | 0.57143               | 0.28571          |
|                  | Department<br>47 | 0-4                        | 0.75926               | 0.18519          | 0.05556                    | 0.67347               | 0.22449          |
| 5-9              |                  | 0.61538                    | 0.26923               | 0.11538          | 0.58333                    | 0.18333               | 0.23333          |



| Departments   | Age group | Not- overweight in 2005 | Overweight in 2005 | Obese in 2005 | Not- overweight in 2010 | Overweight in 2010 | Obese in 2010 |
|---------------|-----------|-------------------------|--------------------|---------------|-------------------------|--------------------|---------------|
|               | 10-14     | 0.88462                 | 0.11538            | 0.00000       | 0.64063                 | 0.21875            | 0.14063       |
|               | 15-19     | 0.86047                 | 0.11628            | 0.02326       | 0.74194                 | 0.20968            | 0.04839       |
|               | 20-24     | 0.69231                 | 0.21538            | 0.09231       | 0.67568                 | 0.18919            | 0.13514       |
|               | 25-29     | 0.56410                 | 0.29487            | 0.14103       | 0.48936                 | 0.31915            | 0.19149       |
|               | 30-34     | 0.41463                 | 0.36585            | 0.21951       | 0.30556                 | 0.47222            | 0.22222       |
|               | 35-39     | 0.49123                 | 0.40351            | 0.10526       | 0.39535                 | 0.37209            | 0.23256       |
|               | 40-44     | 0.42000                 | 0.34000            | 0.24000       | 0.17778                 | 0.42222            | 0.40000       |
|               | 45-49     | 0.14286                 | 0.50000            | 0.35714       | 0.37209                 | 0.46512            | 0.16279       |
|               | 50-54     | 0.35556                 | 0.37778            | 0.26667       | 0.16279                 | 0.58140            | 0.25581       |
|               | 55-59     | 0.35897                 | 0.33333            | 0.30769       | 0.22581                 | 0.45161            | 0.32258       |
| Department 70 | 0-4       | 0.82353                 | 0.09412            | 0.08235       | 0.81250                 | 0.15625            | 0.03125       |
|               | 5-9       | 0.63333                 | 0.33333            | 0.03333       | 0.75904                 | 0.20482            | 0.03614       |
|               | 10-14     | 0.80000                 | 0.14286            | 0.05714       | 0.72826                 | 0.13043            | 0.14130       |
|               | 15-19     | 0.86364                 | 0.11364            | 0.02273       | 0.83000                 | 0.13000            | 0.04000       |
|               | 20-24     | 0.70513                 | 0.26923            | 0.02564       | 0.76364                 | 0.16364            | 0.07273       |
|               | 25-29     | 0.56522                 | 0.33333            | 0.10145       | 0.37500                 | 0.44643            | 0.17857       |
|               | 30-34     | 0.49057                 | 0.41509            | 0.09434       | 0.51724                 | 0.34483            | 0.13793       |
|               | 35-39     | 0.37681                 | 0.40580            | 0.21739       | 0.37333                 | 0.48000            | 0.14667       |
|               | 40-44     | 0.35593                 | 0.42373            | 0.22034       | 0.25424                 | 0.50847            | 0.23729       |
|               | 45-49     | 0.19565                 | 0.36957            | 0.43478       | 0.22449                 | 0.53061            | 0.24490       |
|               | 50-54     | 0.13636                 | 0.59091            | 0.27273       | 0.28333                 | 0.40000            | 0.31667       |
|               | 55-59     | 0.31111                 | 0.48889            | 0.20000       | 0.20930                 | 0.55814            | 0.23256       |
| Department 88 | 0-4       | 0.78571                 | 0.14286            | 0.07143       | 0.50000                 | 0.33333            | 0.16667       |
|               | 5-9       | 0.36364                 | 0.54545            | 0.09091       | 0.40000                 | 0.40000            | 0.20000       |
|               | 10-14     | 0.81818                 | 0.18182            | 0.00000       | 0.50000                 | 0.33333            | 0.16667       |
|               | 15-19     | 0.64286                 | 0.28571            | 0.07143       | 0.16667                 | 0.33333            | 0.50000       |
|               | 20-24     | 0.61905                 | 0.23810            | 0.14286       | 0.33333                 | 0.33333            | 0.33333       |
|               | 25-29     | 0.45833                 | 0.20833            | 0.33333       | 0.50000                 | 0.30000            | 0.20000       |
|               | 30-34     | 0.13043                 | 0.52174            | 0.34783       | 0.30769                 | 0.46154            | 0.23077       |
|               | 35-39     | 0.33333                 | 0.45833            | 0.20833       | 0.14286                 | 0.42857            | 0.42857       |
|               | 40-44     | 0.29167                 | 0.37500            | 0.33333       | 0.37500                 | 0.50000            | 0.12500       |
|               | 45-49     | 0.34615                 | 0.53846            | 0.11538       | 0.27273                 | 0.54545            | 0.18182       |
|               | 50-54     | 0.21053                 | 0.47368            | 0.31579       | 0.11111                 | 0.55556            | 0.33333       |
|               | 55-59     | 0.35294                 | 0.41176            | 0.23529       | 0.00000                 | 0.83333            | 0.16667       |

**Table 25. Mortality rates and population size by age group at the department level without segregate by socioeconomic status (Caribe region) †**

| Departments  | Age group | Mortality rates (R) (%/year) | Not- overweight population in 2005 (Number of people)1 | Overweight population in 2005 (Number of people)2 | Obese population in 2005 (Number of people)3 |
|--------------|-----------|------------------------------|--------------------------------------------------------|---------------------------------------------------|----------------------------------------------|
| Department 8 | 0-4       | 0.01938                      | 158802                                                 | 39701                                             | 8411                                         |
|              | 5-9       | 0.00050                      | 175670                                                 | 18543                                             | 11711                                        |
|              | 10-14     | 0.00045                      | 168986                                                 | 27174                                             | 8492                                         |
|              | 15-19     | 0.00144                      | 177237                                                 | 20851                                             | 3841                                         |

| Departments          | Age group | Mortality rates (R) (%/year) | Not- overweight population in 2005 (Number of people)1 | Overweight population in 2005 (Number of people)2 | Obese population in 2005 (Number of people)3 |
|----------------------|-----------|------------------------------|--------------------------------------------------------|---------------------------------------------------|----------------------------------------------|
|                      | 20-24     | 0.00314                      | 151239                                                 | 31822                                             | 10170                                        |
|                      | 25-29     | 0.00362                      | 103166                                                 | 46312                                             | 19579                                        |
|                      | 30-34     | 0.00373                      | 76965                                                  | 47160                                             | 22259                                        |
|                      | 35-39     | 0.00360                      | 74259                                                  | 51470                                             | 21217                                        |
|                      | 40-44     | 0.00450                      | 60134                                                  | 53369                                             | 27060                                        |
|                      | 45-49     | 0.00525                      | 44781                                                  | 45139                                             | 24003                                        |
|                      | 50-54     | 0.00763                      | 33602                                                  | 32284                                             | 23390                                        |
|                      | 55-59     | 0.01129                      | 25793                                                  | 28544                                             | 13756                                        |
| <b>Department 13</b> | 0-4       | 0.00398                      | 121669                                                 | 21534                                             | 5384                                         |
|                      | 5-9       | 0.00020                      | 131004                                                 | 15948                                             | 5696                                         |
|                      | 10-14     | 0.00024                      | 127074                                                 | 16456                                             | 6399                                         |
|                      | 15-19     | 0.00085                      | 128558                                                 | 8815                                              | 1469                                         |
|                      | 20-24     | 0.00129                      | 106653                                                 | 13566                                             | 6081                                         |
|                      | 25-29     | 0.00141                      | 79035                                                  | 27443                                             | 4940                                         |
|                      | 30-34     | 0.00144                      | 52668                                                  | 33214                                             | 12811                                        |
|                      | 35-39     | 0.00145                      | 50616                                                  | 32900                                             | 13666                                        |
|                      | 40-44     | 0.00193                      | 44329                                                  | 31081                                             | 13757                                        |
|                      | 45-49     | 0.00286                      | 29328                                                  | 30154                                             | 13218                                        |
|                      | 50-54     | 0.00338                      | 27228                                                  | 16756                                             | 12567                                        |
|                      | 55-59     | 0.00512                      | 16764                                                  | 17582                                             | 10222                                        |
| <b>Department 20</b> | 0-4       | 0.00407                      | 61799                                                  | 12086                                             | 1140                                         |
|                      | 5-9       | 0.00030                      | 63879                                                  | 8901                                              | 3142                                         |
|                      | 10-14     | 0.00028                      | 69382                                                  | 3679                                              | 2102                                         |
|                      | 15-19     | 0.00084                      | 58173                                                  | 8573                                              | 1225                                         |
|                      | 20-24     | 0.00215                      | 42807                                                  | 10084                                             | 2470                                         |
|                      | 25-29     | 0.00230                      | 34014                                                  | 11055                                             | 4890                                         |
|                      | 30-34     | 0.00230                      | 23088                                                  | 16711                                             | 4618                                         |
|                      | 35-39     | 0.00237                      | 17984                                                  | 16729                                             | 7946                                         |
|                      | 40-44     | 0.00281                      | 16554                                                  | 14689                                             | 6062                                         |
|                      | 45-49     | 0.00328                      | 9691                                                   | 13528                                             | 6663                                         |
|                      | 50-54     | 0.00504                      | 9930                                                   | 8164                                              | 5296                                         |
|                      | 55-59     | 0.00651                      | 6095                                                   | 7238                                              | 4952                                         |
| <b>Department 23</b> | 0-4       | 0.01525                      | 65180                                                  | 12393                                             | 2295                                         |
|                      | 5-9       | 0.00109                      | 67508                                                  | 7418                                              | 5193                                         |
|                      | 10-14     | 0.00110                      | 75442                                                  | 6723                                              | 1494                                         |
|                      | 15-19     | 0.00399                      | 63497                                                  | 10499                                             | 2500                                         |
|                      | 20-24     | 0.00906                      | 53375                                                  | 10543                                             | 2306                                         |
|                      | 25-29     | 0.01093                      | 40139                                                  | 12961                                             | 4181                                         |
|                      | 30-34     | 0.01080                      | 28747                                                  | 16660                                             | 4573                                         |
|                      | 35-39     | 0.01026                      | 26376                                                  | 15825                                             | 9043                                         |
|                      | 40-44     | 0.01329                      | 20481                                                  | 18466                                             | 7722                                         |
|                      | 45-49     | 0.01586                      | 17831                                                  | 15974                                             | 4086                                         |
|                      | 50-54     | 0.02344                      | 9589                                                   | 13819                                             | 6205                                         |
|                      | 55-59     | 0.03450                      | 9510                                                   | 8111                                              | 4755                                         |
| <b>Department</b>    | 0-4       | 0.00440                      | 34473                                                  | 12241                                             | 2814                                         |

| Departments   | Age group | Mortality rates (R) (%/year) | Not- overweight population in 2005 (Number of people)1 | Overweight population in 2005 (Number of people)2 | Obese population in 2005 (Number of people)3 |
|---------------|-----------|------------------------------|--------------------------------------------------------|---------------------------------------------------|----------------------------------------------|
| 44            | 5-9       | 0.00027                      | 38220                                                  | 4303                                              | 1266                                         |
|               | 10-14     | 0.00035                      | 32445                                                  | 6549                                              | 595                                          |
|               | 15-19     | 0.00085                      | 36989                                                  | 3144                                              | 925                                          |
|               | 20-24     | 0.00242                      | 23393                                                  | 8743                                              | 2127                                         |
|               | 25-29     | 0.00217                      | 18637                                                  | 8030                                              | 2776                                         |
|               | 30-34     | 0.00243                      | 11175                                                  | 9101                                              | 3571                                         |
|               | 35-39     | 0.00260                      | 10057                                                  | 9110                                              | 3904                                         |
|               | 40-44     | 0.00225                      | 7802                                                   | 8726                                              | 3901                                         |
|               | 45-49     | 0.00271                      | 5262                                                   | 7016                                              | 4678                                         |
|               | 50-54     | 0.00425                      | 3792                                                   | 5201                                              | 3251                                         |
| 55-59         | 0.00544   | 3523                         | 3523                                                   | 2694                                              |                                              |
| Department 47 | 0-4       | 0.00367                      | 71559                                                  | 16117                                             | 5480                                         |
|               | 5-9       | 0.00045                      | 78818                                                  | 11260                                             | 4636                                         |
|               | 10-14     | 0.00036                      | 78621                                                  | 7609                                              | 507                                          |
|               | 15-19     | 0.00077                      | 69426                                                  | 6899                                              | 1725                                         |
|               | 20-24     | 0.00126                      | 54854                                                  | 11328                                             | 2087                                         |
|               | 25-29     | 0.00154                      | 36590                                                  | 18151                                             | 6915                                         |
|               | 30-34     | 0.00157                      | 26317                                                  | 20861                                             | 7702                                         |
|               | 35-39     | 0.00173                      | 24083                                                  | 19920                                             | 8622                                         |
|               | 40-44     | 0.00215                      | 21299                                                  | 17158                                             | 8579                                         |
|               | 45-49     | 0.00280                      | 11704                                                  | 18031                                             | 9173                                         |
| 50-54         | 0.00451   | 12884                        | 10863                                                  | 7326                                              |                                              |
| 55-59         | 0.00626   | 9886                         | 7469                                                   | 6591                                              |                                              |
| Department 70 | 0-4       | 0.00295                      | 40868                                                  | 8174                                              | 2189                                         |
|               | 5-9       | 0.00022                      | 45197                                                  | 7951                                              | 1255                                         |
|               | 10-14     | 0.00029                      | 50356                                                  | 4997                                              | 769                                          |
|               | 15-19     | 0.00047                      | 44795                                                  | 4508                                              | 1409                                         |
|               | 20-24     | 0.00110                      | 33633                                                  | 7579                                              | 1421                                         |
|               | 25-29     | 0.00139                      | 24874                                                  | 10613                                             | 1990                                         |
|               | 30-34     | 0.00124                      | 16823                                                  | 12235                                             | 4129                                         |
|               | 35-39     | 0.00178                      | 15398                                                  | 13706                                             | 5076                                         |
|               | 40-44     | 0.00164                      | 12988                                                  | 12811                                             | 4626                                         |
|               | 45-49     | 0.00281                      | 8282                                                   | 9444                                              | 7556                                         |
| 50-54         | 0.00387   | 6860                         | 8861                                                   | 4431                                              |                                              |
| 55-59         | 0.00514   | 7136                         | 5769                                                   | 3644                                              |                                              |
| Department 88 | 0-4       | 0.00204                      | 2873                                                   | 1149                                              | 383                                          |
|               | 5-9       | 0.00021                      | 3082                                                   | 1110                                              | 493                                          |
|               | 10-14     | 0.00040                      | 3376                                                   | 1206                                              | 362                                          |
|               | 15-19     | 0.00084                      | 3121                                                   | 1040                                              | 578                                          |
|               | 20-24     | 0.00207                      | 2988                                                   | 934                                               | 436                                          |
|               | 25-29     | 0.00075                      | 1970                                                   | 1275                                              | 753                                          |
|               | 30-34     | 0.00086                      | 1142                                                   | 1442                                              | 901                                          |
|               | 35-39     | 0.00190                      | 1748                                                   | 1447                                              | 1025                                         |
|               | 40-44     | 0.00244                      | 1501                                                   | 1705                                              | 1296                                         |
| 45-49         | 0.00359   | 1149                         | 1666                                                   | 804                                               |                                              |

| Departments | Age group | Mortality rates (R) (%/year) | Not- overweight population in 2005 (Number of people) <sup>1</sup> | Overweight population in 2005 (Number of people) <sup>2</sup> | Obese population in 2005 (Number of people) <sup>3</sup> |
|-------------|-----------|------------------------------|--------------------------------------------------------------------|---------------------------------------------------------------|----------------------------------------------------------|
|             | 50-54     | 0.00436                      | 826                                                                | 782                                                           | 913                                                      |
|             | 55-59     | 0.00848                      | 388                                                                | 874                                                           | 388                                                      |

<sup>†</sup>Values used in this table are for the urban population

<sup>1</sup> Initial value used in the stock of not-overweight population in 2005.

<sup>2</sup> Initial value used in the stock of overweight population in 2005.

<sup>3</sup> Initial value used in the stock of obese population in 2005.

**Table 26. Mortality rates and population size by age group at the department level for the lower socioeconomic status population (Caribe region) <sup>†</sup>**

| Departments   | Age group | Mortality rates (R) (%/year) | Not- overweight population in 2005 (Number of people) <sup>1</sup> | Overweight population in 2005 (Number of people) <sup>2</sup> | Obese population in 2005 (Number of people) <sup>3</sup> |
|---------------|-----------|------------------------------|--------------------------------------------------------------------|---------------------------------------------------------------|----------------------------------------------------------|
| Department 8  | 0-4       | 0.01938                      | 67394                                                              | 16849                                                         | 3570                                                     |
|               | 5-9       | 0.00050                      | 59112                                                              | 6240                                                          | 3941                                                     |
|               | 10-14     | 0.00045                      | 53991                                                              | 8682                                                          | 2713                                                     |
|               | 15-19     | 0.00144                      | 63574                                                              | 7479                                                          | 1378                                                     |
|               | 20-24     | 0.00314                      | 48016                                                              | 10103                                                         | 3229                                                     |
|               | 25-29     | 0.00362                      | 28951                                                              | 12996                                                         | 5494                                                     |
|               | 30-34     | 0.00373                      | 21225                                                              | 13005                                                         | 6139                                                     |
|               | 35-39     | 0.00360                      | 22238                                                              | 15414                                                         | 6354                                                     |
|               | 40-44     | 0.00450                      | 18812                                                              | 16696                                                         | 8465                                                     |
|               | 45-49     | 0.00525                      | 10280                                                              | 10362                                                         | 5510                                                     |
| Department 13 | 50-54     | 0.00763                      | 10043                                                              | 9650                                                          | 6991                                                     |
|               | 55-59     | 0.01129                      | 6123                                                               | 6776                                                          | 3265                                                     |
|               | 0-4       | 0.00398                      | 52759                                                              | 6999                                                          | 1077                                                     |
|               | 5-9       | 0.00020                      | 61515                                                              | 7974                                                          | 2278                                                     |
|               | 10-14     | 0.00024                      | 56680                                                              | 5485                                                          | 1828                                                     |
|               | 15-19     | 0.00085                      | 43343                                                              | 735                                                           | 735                                                      |
|               | 20-24     | 0.00129                      | 35083                                                              | 5613                                                          | 3274                                                     |
|               | 25-29     | 0.00141                      | 28540                                                              | 7684                                                          | 2195                                                     |
|               | 30-34     | 0.00144                      | 19929                                                              | 9490                                                          | 4270                                                     |
|               | 35-39     | 0.00145                      | 18222                                                              | 11135                                                         | 2531                                                     |
| Department 20 | 40-44     | 0.00193                      | 20381                                                              | 10191                                                         | 5095                                                     |
|               | 45-49     | 0.00286                      | 10740                                                              | 8261                                                          | 2478                                                     |
|               | 50-54     | 0.00338                      | 11729                                                              | 4189                                                          | 419                                                      |
|               | 55-59     | 0.00512                      | 8586                                                               | 4907                                                          | 1227                                                     |
|               | 0-4       | 0.00407                      | 34662                                                              | 4789                                                          | 228                                                      |
|               | 5-9       | 0.00030                      | 29845                                                              | 3142                                                          | 524                                                      |
|               | 10-14     | 0.00028                      | 31537                                                              | 1051                                                          | 526                                                      |
|               | 15-19     | 0.00084                      | 21126                                                              | 2756                                                          | 612                                                      |
|               | 20-24     | 0.00215                      | 19757                                                              | 4116                                                          | 1235                                                     |
|               | 25-29     | 0.00230                      | 13606                                                              | 4039                                                          | 1913                                                     |
| 30-34         | 0.00230   | 12094                        | 4837                                                               | 1979                                                          |                                                          |
| 35-39         | 0.00237   | 8574                         | 6482                                                               | 2509                                                          |                                                          |
| 40-44         | 0.00281   | 6062                         | 3730                                                               | 933                                                           |                                                          |

| Departments   | Age group     | Mortality rates (R) (%/year) | Not- overweight population in 2005 (Number of people)1 | Overweight population in 2005 (Number of people)2 | Obese population in 2005 (Number of people)3 |
|---------------|---------------|------------------------------|--------------------------------------------------------|---------------------------------------------------|----------------------------------------------|
|               | 45-49         | 0.00328                      | 3634                                                   | 5250                                              | 1010                                         |
|               | 50-54         | 0.00504                      | 4193                                                   | 2648                                              | 662                                          |
|               | 55-59         | 0.00651                      | 2667                                                   | 952                                               | 952                                          |
| Department 23 | 0-4           | 0.01525                      | 41311                                                  | 7344                                              | 918                                          |
|               | 5-9           | 0.00109                      | 44511                                                  | 5193                                              | 2226                                         |
|               | 10-14         | 0.00110                      | 44070                                                  | 1494                                              | 747                                          |
|               | 15-19         | 0.00399                      | 33498                                                  | 4500                                              | 0                                            |
|               | 20-24         | 0.00906                      | 28005                                                  | 4613                                              | 988                                          |
|               | 25-29         | 0.01093                      | 20905                                                  | 7526                                              | 836                                          |
|               | 30-34         | 0.01080                      | 15027                                                  | 8820                                              | 2613                                         |
|               | 35-39         | 0.01026                      | 16202                                                  | 6782                                              | 4522                                         |
|               | 40-44         | 0.01329                      | 9737                                                   | 6043                                              | 5372                                         |
|               | 45-49         | 0.01586                      | 10030                                                  | 6687                                              | 1857                                         |
|               | 50-54         | 0.02344                      | 7333                                                   | 5923                                              | 3102                                         |
|               | 55-59         | 0.03450                      | 5874                                                   | 2797                                              | 839                                          |
|               | Department 44 | 0-4                          | 0.00440                                                | 19277                                             | 5910                                         |
| 5-9           |               | 0.00027                      | 24299                                                  | 1772                                              | 0                                            |
| 10-14         |               | 0.00035                      | 15478                                                  | 3274                                              | 0                                            |
| 15-19         |               | 0.00085                      | 16090                                                  | 1665                                              | 370                                          |
| 20-24         |               | 0.00242                      | 10515                                                  | 2954                                              | 709                                          |
| 25-29         |               | 0.00217                      | 9219                                                   | 3470                                              | 1090                                         |
| 30-34         |               | 0.00243                      | 5415                                                   | 2765                                              | 1843                                         |
| 35-39         |               | 0.00260                      | 3668                                                   | 3904                                              | 1420                                         |
| 40-44         |               | 0.00225                      | 3593                                                   | 2977                                              | 616                                          |
| 45-49         |               | 0.00271                      | 2456                                                   | 1403                                              | 1520                                         |
| 50-54         |               | 0.00425                      | 1842                                                   | 1517                                              | 867                                          |
| 55-59         |               | 0.00544                      | 1865                                                   | 829                                               | 725                                          |
| Department 47 |               | 0-4                          | 0.00367                                                | 39648                                             | 8703                                         |
|               | 5-9           | 0.00045                      | 45039                                                  | 3974                                              | 0                                            |
|               | 10-14         | 0.00036                      | 39057                                                  | 3551                                              | 507                                          |
|               | 15-19         | 0.00077                      | 37947                                                  | 2156                                              | 431                                          |
|               | 20-24         | 0.00126                      | 27725                                                  | 3279                                              | 0                                            |
|               | 25-29         | 0.00154                      | 15558                                                  | 8067                                              | 1152                                         |
|               | 30-34         | 0.00157                      | 13479                                                  | 8665                                              | 3209                                         |
|               | 35-39         | 0.00173                      | 9811                                                   | 7433                                              | 3865                                         |
|               | 40-44         | 0.00215                      | 7691                                                   | 5621                                              | 2071                                         |
|               | 45-49         | 0.00280                      | 7275                                                   | 6643                                              | 2214                                         |
|               | 50-54         | 0.00451                      | 7074                                                   | 5305                                              | 2779                                         |
|               | 55-59         | 0.00626                      | 4833                                                   | 2636                                              | 1977                                         |
|               | Department 70 | 0-4                          | 0.00295                                                | 23645                                             | 5692                                         |
| 5-9           |               | 0.00022                      | 25110                                                  | 1674                                              | 418                                          |
| 10-14         |               | 0.00029                      | 28061                                                  | 1153                                              | 0                                            |
| 15-19         |               | 0.00047                      | 24510                                                  | 2254                                              | 563                                          |
| 20-24         |               | 0.00110                      | 14527                                                  | 2842                                              | 1105                                         |
| 25-29         |               | 0.00139                      | 12105                                                  | 3980                                              | 332                                          |

| Departments   | Age group | Mortality rates (R) (%/year) | Not- overweight population in 2005 (Number of people) <sup>1</sup> | Overweight population in 2005 (Number of people) <sup>2</sup> | Obese population in 2005 (Number of people) <sup>3</sup> |
|---------------|-----------|------------------------------|--------------------------------------------------------------------|---------------------------------------------------------------|----------------------------------------------------------|
|               | 30-34     | 0.00124                      | 8870                                                               | 6576                                                          | 1376                                                     |
|               | 35-39     | 0.00178                      | 6938                                                               | 5415                                                          | 1523                                                     |
|               | 40-44     | 0.00164                      | 6405                                                               | 5160                                                          | 1245                                                     |
|               | 45-49     | 0.00281                      | 4214                                                               | 4940                                                          | 2325                                                     |
|               | 50-54     | 0.00387                      | 3001                                                               | 2716                                                          | 1572                                                     |
|               | 55-59     | 0.00514                      | 3492                                                               | 1974                                                          | 1518                                                     |
| Department 88 | 0-4       | 0.00204                      | 1101                                                               | 431                                                           | 48                                                       |
|               | 5-9       | 0.00021                      | 1849                                                               | 123                                                           | 123                                                      |
|               | 10-14     | 0.00040                      | 1567                                                               | 362                                                           | 121                                                      |
|               | 15-19     | 0.00084                      | 1271                                                               | 462                                                           | 0                                                        |
|               | 20-24     | 0.00207                      | 1120                                                               | 373                                                           | 124                                                      |
|               | 25-29     | 0.00075                      | 869                                                                | 174                                                           | 58                                                       |
|               | 30-34     | 0.00086                      | 481                                                                | 180                                                           | 120                                                      |
|               | 35-39     | 0.00190                      | 663                                                                | 241                                                           | 181                                                      |
|               | 40-44     | 0.00244                      | 341                                                                | 409                                                           | 409                                                      |
|               | 45-49     | 0.00359                      | 460                                                                | 287                                                           | 287                                                      |
| 50-54         | 0.00436   | 217                          | 43                                                                 | 174                                                           |                                                          |
| 55-59         | 0.00848   | 97                           | 146                                                                | 49                                                            |                                                          |

<sup>†</sup>Values used in this table are for the urban population

<sup>1</sup> Initial value used in the stock of not-overweight population in 2005 for lower SES.

<sup>2</sup> Initial value used in the stock of overweight population in 2005 for lower SES.

<sup>3</sup> Initial value used in the stock of obese population in 2005 for lower SES.

**Table 27. Mortality rates and population size by age group at the department level for the middle socioeconomic status population (Caribe region) <sup>†</sup>**

| Departments   | Age group | Mortality rates (R) (%/year) | Not- overweight population in 2005 (Number of people) <sup>1</sup> | Overweight population in 2005 (Number of people) <sup>2</sup> | Obese population in 2005 (Number of people) <sup>3</sup> |
|---------------|-----------|------------------------------|--------------------------------------------------------------------|---------------------------------------------------------------|----------------------------------------------------------|
| Department 8  | 0-4       | 0.01938                      | 45084                                                              | 9757                                                          | 2355                                                     |
|               | 5-9       | 0.00050                      | 50749                                                              | 4880                                                          | 976                                                      |
|               | 10-14     | 0.00045                      | 55196                                                              | 5095                                                          | 1698                                                     |
|               | 15-19     | 0.00144                      | 43349                                                              | 6036                                                          | 549                                                      |
|               | 20-24     | 0.00314                      | 44945                                                              | 6889                                                          | 3609                                                     |
|               | 25-29     | 0.00362                      | 33887                                                              | 13178                                                         | 6024                                                     |
|               | 30-34     | 0.00373                      | 21128                                                              | 14337                                                         | 3773                                                     |
|               | 35-39     | 0.00360                      | 23574                                                              | 12966                                                         | 5501                                                     |
|               | 40-44     | 0.00450                      | 13906                                                              | 18040                                                         | 7517                                                     |
|               | 45-49     | 0.00525                      | 13255                                                              | 16121                                                         | 6090                                                     |
|               | 50-54     | 0.00763                      | 8565                                                               | 8565                                                          | 5930                                                     |
| 55-59         | 0.01129   | 9285                         | 5502                                                               | 2407                                                          |                                                          |
| Department 13 | 0-4       | 0.00398                      | 32302                                                              | 7537                                                          | 538                                                      |
|               | 5-9       | 0.00020                      | 30757                                                              | 2278                                                          | 1139                                                     |
|               | 10-14     | 0.00024                      | 25598                                                              | 2743                                                          | 914                                                      |
|               | 15-19     | 0.00085                      | 29385                                                              | 0                                                             | 0                                                        |
|               | 20-24     | 0.00129                      | 22453                                                              | 3274                                                          | 936                                                      |

| Departments   | Age group     | Mortality rates (R) (%/year) | Not- overweight population in 2005 (Number of people)1 | Overweight population in 2005 (Number of people)2 | Obese population in 2005 (Number of people)3 |
|---------------|---------------|------------------------------|--------------------------------------------------------|---------------------------------------------------|----------------------------------------------|
|               | 25-29         | 0.00141                      | 18661                                                  | 6586                                              | 549                                          |
|               | 30-34         | 0.00144                      | 9964                                                   | 10439                                             | 2847                                         |
|               | 35-39         | 0.00145                      | 12654                                                  | 7592                                              | 5568                                         |
|               | 40-44         | 0.00193                      | 10191                                                  | 4586                                              | 3567                                         |
|               | 45-49         | 0.00286                      | 5370                                                   | 4957                                              | 826                                          |
|               | 50-54         | 0.00338                      | 4608                                                   | 3351                                              | 3351                                         |
|               | 55-59         | 0.00512                      | 2044                                                   | 4089                                              | 2044                                         |
| Department 20 | 0-4           | 0.00407                      | 15735                                                  | 4561                                              | 228                                          |
|               | 5-9           | 0.00030                      | 23562                                                  | 3665                                              | 1571                                         |
|               | 10-14         | 0.00028                      | 25230                                                  | 2102                                              | 526                                          |
|               | 15-19         | 0.00084                      | 19595                                                  | 3368                                              | 306                                          |
|               | 20-24         | 0.00215                      | 11937                                                  | 2881                                              | 617                                          |
|               | 25-29         | 0.00230                      | 10842                                                  | 4039                                              | 1488                                         |
|               | 30-34         | 0.00230                      | 5497                                                   | 5937                                              | 1539                                         |
|               | 35-39         | 0.00237                      | 6273                                                   | 5228                                              | 2509                                         |
|               | 40-44         | 0.00281                      | 5596                                                   | 4896                                              | 2332                                         |
|               | 45-49         | 0.00328                      | 3432                                                   | 4442                                              | 2625                                         |
|               | 50-54         | 0.00504                      | 3751                                                   | 3310                                              | 1545                                         |
|               | 55-59         | 0.00651                      | 2476                                                   | 3048                                              | 2095                                         |
|               | Department 23 | 0-4                          | 0.01525                                                | 14229                                             | 2754                                         |
| 5-9           |               | 0.00109                      | 14837                                                  | 1484                                              | 2226                                         |
| 10-14         |               | 0.00110                      | 19421                                                  | 2988                                              | 747                                          |
| 15-19         |               | 0.00399                      | 13499                                                  | 2000                                              | 2000                                         |
| 20-24         |               | 0.00906                      | 11202                                                  | 2636                                              | 0                                            |
| 25-29         |               | 0.01093                      | 10453                                                  | 2509                                              | 2509                                         |
| 30-34         |               | 0.01080                      | 7840                                                   | 3267                                              | 980                                          |
| 35-39         |               | 0.01026                      | 6029                                                   | 4522                                              | 1130                                         |
| 40-44         |               | 0.01329                      | 5036                                                   | 7051                                              | 2014                                         |
| 45-49         |               | 0.01586                      | 2972                                                   | 3343                                              | 743                                          |
| 50-54         |               | 0.02344                      | 1410                                                   | 1974                                              | 846                                          |
| 55-59         |               | 0.03450                      | 1399                                                   | 2797                                              | 1399                                         |
| Department 44 |               | 0-4                          | 0.00440                                                | 9427                                              | 3799                                         |
|               | 5-9           | 0.00027                      | 9618                                                   | 759                                               | 506                                          |
|               | 10-14         | 0.00035                      | 8930                                                   | 1191                                              | 0                                            |
|               | 15-19         | 0.00085                      | 12391                                                  | 555                                               | 555                                          |
|               | 20-24         | 0.00242                      | 8506                                                   | 3072                                              | 473                                          |
|               | 25-29         | 0.00217                      | 5254                                                   | 2181                                              | 1090                                         |
|               | 30-34         | 0.00243                      | 3802                                                   | 2995                                              | 806                                          |
|               | 35-39         | 0.00260                      | 3313                                                   | 3313                                              | 1538                                         |
|               | 40-44         | 0.00225                      | 2361                                                   | 2669                                              | 1232                                         |
|               | 45-49         | 0.00271                      | 1520                                                   | 2456                                              | 1988                                         |
|               | 50-54         | 0.00425                      | 1192                                                   | 2059                                              | 975                                          |
|               | 55-59         | 0.00544                      | 1140                                                   | 1347                                              | 829                                          |
|               | Department 47 | 0-4                          | 18696                                                  | 4190                                              | 2256                                         |
| 5-9           |               | 23182                        | 2649                                                   | 2649                                              | 23182                                        |

| Departments   | Age group | Mortality rates (R) (%/year) | Not- overweight population in 2005 (Number of people) <sup>1</sup> | Overweight population in 2005 (Number of people) <sup>2</sup> | Obese population in 2005 (Number of people) <sup>3</sup> |
|---------------|-----------|------------------------------|--------------------------------------------------------------------|---------------------------------------------------------------|----------------------------------------------------------|
|               | 10-14     | 27898                        | 2536                                                               | 0                                                             | 27898                                                    |
|               | 15-19     | 15524                        | 2587                                                               | 862                                                           | 15524                                                    |
|               | 20-24     | 13713                        | 3876                                                               | 298                                                           | 13713                                                    |
|               | 25-29     | 8355                         | 3457                                                               | 2593                                                          | 8355                                                     |
|               | 30-34     | 7382                         | 7382                                                               | 1605                                                          | 7382                                                     |
|               | 35-39     | 5946                         | 5649                                                               | 2973                                                          | 5946                                                     |
|               | 40-44     | 7396                         | 6508                                                               | 2958                                                          | 7396                                                     |
|               | 45-49     | 2531                         | 4745                                                               | 2214                                                          | 2531                                                     |
|               | 50-54     | 1768                         | 1263                                                               | 1516                                                          | 1768                                                     |
|               | 55-59     | 1977                         | 1977                                                               | 1977                                                          | 1977                                                     |
| Department 70 | 0-4       | 0.00295                      | 7006                                                               | 1314                                                          | 584                                                      |
|               | 5-9       | 0.00022                      | 12136                                                              | 2092                                                          | 418                                                      |
|               | 10-14     | 0.00029                      | 11532                                                              | 1922                                                          | 0                                                        |
|               | 15-19     | 0.00047                      | 9579                                                               | 845                                                           | 563                                                      |
|               | 20-24     | 0.00110                      | 10421                                                              | 1421                                                          | 0                                                        |
|               | 25-29     | 0.00139                      | 6301                                                               | 2819                                                          | 497                                                      |
|               | 30-34     | 0.00124                      | 3976                                                               | 2294                                                          | 1988                                                     |
|               | 35-39     | 0.00178                      | 4061                                                               | 3553                                                          | 1015                                                     |
|               | 40-44     | 0.00164                      | 2847                                                               | 3203                                                          | 1068                                                     |
|               | 45-49     | 0.00281                      | 2761                                                               | 2034                                                          | 2325                                                     |
| Department 88 | 0-4       | 0.00204                      | 718                                                                | 527                                                           | 239                                                      |
|               | 5-9       | 0.00021                      | 740                                                                | 247                                                           | 247                                                      |
|               | 10-14     | 0.00040                      | 723                                                                | 603                                                           | 241                                                      |
|               | 15-19     | 0.00084                      | 809                                                                | 116                                                           | 462                                                      |
|               | 20-24     | 0.00207                      | 1058                                                               | 249                                                           | 124                                                      |
|               | 25-29     | 0.00075                      | 464                                                                | 811                                                           | 232                                                      |
|               | 30-34     | 0.00086                      | 481                                                                | 541                                                           | 300                                                      |
|               | 35-39     | 0.00190                      | 603                                                                | 542                                                           | 542                                                      |
|               | 40-44     | 0.00244                      | 682                                                                | 682                                                           | 341                                                      |
|               | 45-49     | 0.00359                      | 172                                                                | 574                                                           | 345                                                      |
|               | 50-54     | 0.00436                      | 435                                                                | 348                                                           | 478                                                      |
|               | 55-59     | 0.00848                      | 0                                                                  | 388                                                           | 146                                                      |

† Values used in this table are for the urban population

1 Initial value used in the stock of not-overweight population in 2005 for middle SES.

2 Initial value used in the stock of overweight population in 2005 for middle SES.

3 Initial value used in the stock of obese population in 2005 for middle SES.

**Table 28. Mortality rates and population size by age group at the department level for the higher socioeconomic status population (Caribe region) †**



| Departments   | Age group     | Mortality rates (R) (%/year) | Not- overweight population in 2005 (Number of people)1 | Overweight population in 2005 (Number of people)2 | Obese population in 2005 (Number of people)3 |
|---------------|---------------|------------------------------|--------------------------------------------------------|---------------------------------------------------|----------------------------------------------|
| Department 8  | 0-4           | 0.01938                      | 45084                                                  | 12785                                             | 4037                                         |
|               | 5-9           | 0.00050                      | 59533                                                  | 10735                                             | 9759                                         |
|               | 10-14         | 0.00045                      | 52649                                                  | 18682                                             | 5944                                         |
|               | 15-19         | 0.00144                      | 64749                                                  | 11523                                             | 3292                                         |
|               | 20-24         | 0.00314                      | 55771                                                  | 15747                                             | 4921                                         |
|               | 25-29         | 0.00362                      | 41793                                                  | 19202                                             | 7530                                         |
|               | 30-34         | 0.00373                      | 27919                                                  | 24146                                             | 14714                                        |
|               | 35-39         | 0.00360                      | 24360                                                  | 25932                                             | 10608                                        |
|               | 40-44         | 0.00450                      | 20295                                                  | 22550                                             | 14282                                        |
|               | 45-49         | 0.00525                      | 18987                                                  | 21853                                             | 11464                                        |
|               | 50-54         | 0.00763                      | 10212                                                  | 16801                                             | 12518                                        |
| 55-59         | 0.01129       | 8254                         | 18571                                                  | 7910                                              |                                              |
| Department 13 | 0-4           | 0.00398                      | 36608                                                  | 6999                                              | 3769                                         |
|               | 5-9           | 0.00020                      | 38732                                                  | 5696                                              | 2278                                         |
|               | 10-14         | 0.00024                      | 44796                                                  | 8228                                              | 3657                                         |
|               | 15-19         | 0.00085                      | 55831                                                  | 8081                                              | 735                                          |
|               | 20-24         | 0.00129                      | 49117                                                  | 4678                                              | 1871                                         |
|               | 25-29         | 0.00141                      | 31833                                                  | 13172                                             | 2195                                         |
|               | 30-34         | 0.00144                      | 22776                                                  | 13286                                             | 5694                                         |
|               | 35-39         | 0.00145                      | 19740                                                  | 14172                                             | 5568                                         |
|               | 40-44         | 0.00193                      | 13757                                                  | 16305                                             | 5095                                         |
|               | 45-49         | 0.00286                      | 13218                                                  | 16936                                             | 9914                                         |
|               | 50-54         | 0.00338                      | 10891                                                  | 9216                                              | 8797                                         |
|               | 55-59         | 0.00512                      | 6133                                                   | 8586                                              | 6951                                         |
|               | Department 20 | 0-4                          | 0.00407                                                | 11402                                             | 2736                                         |
| 5-9           |               | 0.00030                      | 10472                                                  | 2094                                              | 1047                                         |
| 10-14         |               | 0.00028                      | 12615                                                  | 526                                               | 1051                                         |
| 15-19         |               | 0.00084                      | 17452                                                  | 2449                                              | 306                                          |
| 20-24         |               | 0.00215                      | 11113                                                  | 3087                                              | 617                                          |
| 25-29         |               | 0.00230                      | 9566                                                   | 2976                                              | 1488                                         |
| 30-34         |               | 0.00230                      | 5497                                                   | 5937                                              | 1099                                         |
| 35-39         |               | 0.00237                      | 3137                                                   | 5019                                              | 2928                                         |
| 40-44         |               | 0.00281                      | 4896                                                   | 6062                                              | 2798                                         |
| 45-49         |               | 0.00328                      | 2625                                                   | 3836                                              | 3029                                         |
| 50-54         |               | 0.00504                      | 1986                                                   | 2207                                              | 3089                                         |
| 55-59         | 0.00651       | 952                          | 3238                                                   | 1905                                              |                                              |
| Department 23 | 0-4           | 0.01525                      | 9639                                                   | 2295                                              | 918                                          |
|               | 5-9           | 0.00109                      | 8160                                                   | 742                                               | 742                                          |
|               | 10-14         | 0.00110                      | 11951                                                  | 2241                                              | 0                                            |
|               | 15-19         | 0.00399                      | 16499                                                  | 4000                                              | 500                                          |
|               | 20-24         | 0.00906                      | 14167                                                  | 3295                                              | 1318                                         |
|               | 25-29         | 0.01093                      | 8780                                                   | 2927                                              | 836                                          |
|               | 30-34         | 0.01080                      | 5880                                                   | 4573                                              | 980                                          |
|               | 35-39         | 0.01026                      | 4145                                                   | 4522                                              | 3391                                         |
|               | 40-44         | 0.01329                      | 5708                                                   | 5372                                              | 336                                          |

| Departments   | Age group     | Mortality rates (R) (%/year) | Not- overweight population in 2005 (Number of people)1 | Overweight population in 2005 (Number of people)2 | Obese population in 2005 (Number of people)3 |
|---------------|---------------|------------------------------|--------------------------------------------------------|---------------------------------------------------|----------------------------------------------|
|               | 45-49         | 0.01586                      | 4829                                                   | 5944                                              | 1486                                         |
|               | 50-54         | 0.02344                      | 846                                                    | 5923                                              | 2256                                         |
|               | 55-59         | 0.03450                      | 2238                                                   | 2517                                              | 2517                                         |
| Department 44 | 0-4           | 0.00440                      | 5769                                                   | 2533                                              | 844                                          |
|               | 5-9           | 0.00027                      | 4303                                                   | 1772                                              | 759                                          |
|               | 10-14         | 0.00035                      | 8037                                                   | 2084                                              | 595                                          |
|               | 15-19         | 0.00085                      | 8508                                                   | 925                                               | 0                                            |
|               | 20-24         | 0.00242                      | 4371                                                   | 2717                                              | 945                                          |
|               | 25-29         | 0.00217                      | 4164                                                   | 2379                                              | 595                                          |
|               | 30-34         | 0.00243                      | 1959                                                   | 3341                                              | 922                                          |
|               | 35-39         | 0.00260                      | 3076                                                   | 1893                                              | 947                                          |
|               | 40-44         | 0.00225                      | 1848                                                   | 3080                                              | 2053                                         |
|               | 45-49         | 0.00271                      | 1286                                                   | 3157                                              | 1169                                         |
|               | 50-54         | 0.00425                      | 758                                                    | 1625                                              | 1409                                         |
|               | 55-59         | 0.00544                      | 518                                                    | 1347                                              | 1140                                         |
|               | Department 47 | 0-4                          | 0.00367                                                | 13216                                             | 3223                                         |
| 5-9           |               | 0.00045                      | 10597                                                  | 4636                                              | 1987                                         |
| 10-14         |               | 0.00036                      | 11666                                                  | 1522                                              | 0                                            |
| 15-19         |               | 0.00077                      | 15955                                                  | 2156                                              | 431                                          |
| 20-24         |               | 0.00126                      | 13415                                                  | 4174                                              | 1789                                         |
| 25-29         |               | 0.00154                      | 12677                                                  | 6627                                              | 3169                                         |
| 30-34         |               | 0.00157                      | 5456                                                   | 4814                                              | 2888                                         |
| 35-39         |               | 0.00173                      | 8325                                                   | 6838                                              | 1784                                         |
| 40-44         |               | 0.00215                      | 6212                                                   | 5029                                              | 3550                                         |
| 45-49         |               | 0.00280                      | 1898                                                   | 6643                                              | 4745                                         |
| 50-54         |               | 0.00451                      | 4042                                                   | 4295                                              | 3032                                         |
| 55-59         |               | 0.00626                      | 3076                                                   | 2856                                              | 2636                                         |
| Department 70 |               | 0-4                          | 0.00295                                                | 10217                                             | 1168                                         |
|               | 5-9           | 0.00022                      | 7951                                                   | 4185                                              | 418                                          |
|               | 10-14         | 0.00029                      | 10763                                                  | 1922                                              | 769                                          |
|               | 15-19         | 0.00047                      | 10706                                                  | 1409                                              | 282                                          |
|               | 20-24         | 0.00110                      | 8685                                                   | 3316                                              | 316                                          |
|               | 25-29         | 0.00139                      | 6467                                                   | 3814                                              | 1161                                         |
|               | 30-34         | 0.00124                      | 3976                                                   | 3365                                              | 765                                          |
|               | 35-39         | 0.00178                      | 4400                                                   | 4738                                              | 2538                                         |
|               | 40-44         | 0.00164                      | 3736                                                   | 4448                                              | 2313                                         |
|               | 45-49         | 0.00281                      | 1308                                                   | 2470                                              | 2906                                         |
|               | 50-54         | 0.00387                      | 858                                                    | 3716                                              | 1715                                         |
|               | 55-59         | 0.00514                      | 2126                                                   | 3340                                              | 1366                                         |
|               | Department 88 | 0-4                          | 0.00204                                                | 1053                                              | 192                                          |
| 5-9           |               | 0.00021                      | 493                                                    | 740                                               | 123                                          |
| 10-14         |               | 0.00040                      | 1085                                                   | 241                                               | 0                                            |
| 15-19         |               | 0.00084                      | 1040                                                   | 462                                               | 116                                          |
| 20-24         |               | 0.00207                      | 809                                                    | 311                                               | 187                                          |
| 25-29         |               | 0.00075                      | 637                                                    | 290                                               | 464                                          |

| Departments | Age group | Mortality rates (R) (%/year) | Not- overweight population in 2005 (Number of people) <sup>1</sup> | Overweight population in 2005 (Number of people) <sup>2</sup> | Obese population in 2005 (Number of people) <sup>3</sup> |
|-------------|-----------|------------------------------|--------------------------------------------------------------------|---------------------------------------------------------------|----------------------------------------------------------|
|             | 30-34     | 0.00086                      | 180                                                                | 721                                                           | 481                                                      |
|             | 35-39     | 0.00190                      | 482                                                                | 663                                                           | 301                                                      |
|             | 40-44     | 0.00244                      | 477                                                                | 614                                                           | 546                                                      |
|             | 45-49     | 0.00359                      | 517                                                                | 804                                                           | 172                                                      |
|             | 50-54     | 0.00436                      | 174                                                                | 391                                                           | 261                                                      |
|             | 55-59     | 0.00848                      | 291                                                                | 340                                                           | 194                                                      |

†Values used in this table are for the urban population

<sup>1</sup> Initial value used in the stock of not-overweight population in 2005 for higher SES.

<sup>2</sup> Initial value used in the stock of overweight population in 2005 for higher SES.

<sup>3</sup> Initial value used in the stock of obese population in 2005 for higher SES.

## 1.2 Oriental region

The Oriental region of Colombia is located in the central eastern part of the national territory and consists of five departments, these are:

- Boyacá (15)
- Cundinamarca (25)
- Meta (50)
- Norte De Santander (54)
- Santander (68)

### 1.2.1 Data and model parameters used

**Table 29. Prevalent rates of entire population by age group, sex, and body mass index category in 2005 (Oriental region)**

| Age Group | Nutritional State Males |           |         | Nutritional State Females |           |         |
|-----------|-------------------------|-----------|---------|---------------------------|-----------|---------|
|           | Not-Overweigh           | Overweigh | Obese   | Not-Overweigh             | Overweigh | Obese   |
| 0-4       | 0.72968                 | 0.19471   | 0.07561 | 0.76311                   | 0.19417   | 0.04272 |
| 5-9       | 0.77491                 | 0.15867   | 0.06642 | 0.83459                   | 0.11654   | 0.04887 |
| 10-14     | 0.80695                 | 0.11969   | 0.07336 | 0.81469                   | 0.16084   | 0.02448 |
| 15-19     | 0.91923                 | 0.06538   | 0.01538 | 0.83235                   | 0.13529   | 0.03235 |
| 20-24     | 0.73981                 | 0.21317   | 0.04702 | 0.72453                   | 0.22830   | 0.04717 |
| 25-29     | 0.58462                 | 0.31923   | 0.09615 | 0.62268                   | 0.29691   | 0.08041 |
| 30-34     | 0.51639                 | 0.36885   | 0.11475 | 0.48182                   | 0.37273   | 0.14545 |
| 35-39     | 0.42424                 | 0.43290   | 0.14286 | 0.47368                   | 0.36000   | 0.16632 |
| 40-44     | 0.42553                 | 0.42553   | 0.14894 | 0.36893                   | 0.37864   | 0.25243 |
| 45-49     | 0.35593                 | 0.45198   | 0.19209 | 0.26221                   | 0.47301   | 0.26478 |
| 50-54     | 0.37805                 | 0.42683   | 0.19512 | 0.27303                   | 0.43421   | 0.29276 |
| 55-59     | 0.39716                 | 0.41135   | 0.19149 | 0.24783                   | 0.44348   | 0.30870 |

**Table 30. Prevalent rates of lower socioeconomic status population by age group, sex, and body mass index category in 2005 (Oriental region)**

| Age Group | Nutritional State Males |           |         | Nutritional State Females |           |         |
|-----------|-------------------------|-----------|---------|---------------------------|-----------|---------|
|           | Not-Overweigh           | Overweigh | Obese   | Not-Overweigh             | Overweigh | Obese   |
| 0-4       | 0.77698                 | 0.17266   | 0.05036 | 0.77344                   | 0.17188   | 0.05469 |
| 5-9       | 0.82456                 | 0.15789   | 0.01754 | 0.91071                   | 0.03571   | 0.05357 |
| 10-14     | 0.90476                 | 0.09524   | 0.00000 | 0.83333                   | 0.14583   | 0.02083 |
| 15-19     | 0.96296                 | 0.01852   | 0.01852 | 0.86885                   | 0.11475   | 0.01639 |
| 20-24     | 0.80392                 | 0.17647   | 0.01961 | 0.68182                   | 0.28409   | 0.03409 |
| 25-29     | 0.78049                 | 0.14634   | 0.07317 | 0.63542                   | 0.27083   | 0.09375 |
| 30-34     | 0.57447                 | 0.40426   | 0.02128 | 0.51429                   | 0.42857   | 0.05714 |
| 35-39     | 0.58974                 | 0.38462   | 0.02564 | 0.50000                   | 0.35294   | 0.14706 |
| 40-44     | 0.67442                 | 0.23256   | 0.09302 | 0.40278                   | 0.37500   | 0.22222 |
| 45-49     | 0.60000                 | 0.30000   | 0.10000 | 0.28889                   | 0.46667   | 0.24444 |
| 50-54     | 0.55556                 | 0.27778   | 0.16667 | 0.40909                   | 0.34091   | 0.25000 |
| 55-59     | 0.62963                 | 0.25926   | 0.11111 | 0.31707                   | 0.41463   | 0.26829 |

**Table 31. Prevalent rates of middle socioeconomic status population by age group, sex, and body mass index category in 2005 (Oriental region)**

| Age Group | Nutritional State Males |           |         | Nutritional State Females |           |         |
|-----------|-------------------------|-----------|---------|---------------------------|-----------|---------|
|           | Not-Overweigh           | Overweigh | Obese   | Not-Overweigh             | Overweigh | Obese   |
| 0-4       | 0.72826                 | 0.18478   | 0.08696 | 0.81215                   | 0.17127   | 0.01657 |
| 5-9       | 0.84337                 | 0.09639   | 0.06024 | 0.85897                   | 0.11538   | 0.02564 |
| 10-14     | 0.76667                 | 0.15556   | 0.07778 | 0.90588                   | 0.09412   | 0.00000 |
| 15-19     | 0.90123                 | 0.08642   | 0.01235 | 0.83333                   | 0.11765   | 0.04902 |
| 20-24     | 0.76596                 | 0.22340   | 0.01064 | 0.68047                   | 0.23669   | 0.08284 |
| 25-29     | 0.57143                 | 0.30952   | 0.11905 | 0.62000                   | 0.32667   | 0.05333 |
| 30-34     | 0.53425                 | 0.31507   | 0.15068 | 0.41606                   | 0.40146   | 0.18248 |
| 35-39     | 0.47761                 | 0.38806   | 0.13433 | 0.41830                   | 0.41176   | 0.16993 |
| 40-44     | 0.39189                 | 0.43243   | 0.17568 | 0.39394                   | 0.37374   | 0.23232 |
| 45-49     | 0.38182                 | 0.54545   | 0.07273 | 0.28814                   | 0.39831   | 0.31356 |
| 50-54     | 0.48000                 | 0.38000   | 0.14000 | 0.32051                   | 0.35897   | 0.32051 |
| 55-59     | 0.38462                 | 0.43590   | 0.17949 | 0.33333                   | 0.46032   | 0.20635 |

**Table 32. Prevalent rates of higher socioeconomic status population by age group, sex, and body mass index category in 2005 (Oriental region)**

| Age Group | Nutritional State Males |           |         | Nutritional State Females |           |         |
|-----------|-------------------------|-----------|---------|---------------------------|-----------|---------|
|           | Not-Overweigh           | Overweigh | Obese   | Not-Overweigh             | Overweigh | Obese   |
| 0-4       | 0.69903                 | 0.21845   | 0.08252 | 0.71359                   | 0.22816   | 0.05825 |
| 5-9       | 0.70992                 | 0.19847   | 0.09160 | 0.78788                   | 0.15152   | 0.06061 |
| 10-14     | 0.80315                 | 0.10236   | 0.09449 | 0.75817                   | 0.20261   | 0.03922 |
| 15-19     | 0.91200                 | 0.07200   | 0.01600 | 0.81921                   | 0.15254   | 0.02825 |
| 20-24     | 0.70690                 | 0.21839   | 0.07471 | 0.76557                   | 0.20513   | 0.02930 |
| 25-29     | 0.53333                 | 0.37778   | 0.08889 | 0.61925                   | 0.28870   | 0.09205 |
| 30-34     | 0.48387                 | 0.38710   | 0.12903 | 0.51073                   | 0.33906   | 0.15021 |
| 35-39     | 0.34400                 | 0.47200   | 0.18400 | 0.50000                   | 0.33071   | 0.16929 |
| 40-44     | 0.35593                 | 0.49153   | 0.15254 | 0.34855                   | 0.38174   | 0.26971 |
| 45-49     | 0.29412                 | 0.43137   | 0.27451 | 0.24336                   | 0.51327   | 0.24336 |
| 50-54     | 0.29167                 | 0.47917   | 0.22917 | 0.21978                   | 0.48901   | 0.29121 |

|       |         |         |         |         |         |         |
|-------|---------|---------|---------|---------|---------|---------|
| 55-59 | 0.32000 | 0.45333 | 0.22667 | 0.18254 | 0.44444 | 0.37302 |
|-------|---------|---------|---------|---------|---------|---------|

**Table 33. Prevalent rates of entire population by age group, sex, and body mass index category in 2010 (Oriental region)**

| Age Group | Nutritional State Males |           |         | Nutritional State Females |           |         |
|-----------|-------------------------|-----------|---------|---------------------------|-----------|---------|
|           | Not-Overweigh           | Overweigh | Obese   | Not-Overweigh             | Overweigh | Obese   |
| 0-4       | 0.75081                 | 0.19094   | 0.05825 | 0.79614                   | 0.16164   | 0.04222 |
| 5-9       | 0.75282                 | 0.16027   | 0.08691 | 0.81051                   | 0.14020   | 0.04929 |
| 10-14     | 0.75161                 | 0.16022   | 0.08817 | 0.78909                   | 0.16579   | 0.04512 |
| 15-19     | 0.83222                 | 0.12650   | 0.04128 | 0.78791                   | 0.16484   | 0.04725 |
| 20-24     | 0.71358                 | 0.21358   | 0.07285 | 0.68146                   | 0.23238   | 0.08616 |
| 25-29     | 0.51866                 | 0.34774   | 0.13360 | 0.60227                   | 0.26278   | 0.13494 |
| 30-34     | 0.45244                 | 0.35267   | 0.19490 | 0.47287                   | 0.35349   | 0.17364 |
| 35-39     | 0.41534                 | 0.40476   | 0.17989 | 0.39840                   | 0.40320   | 0.19840 |
| 40-44     | 0.37907                 | 0.43488   | 0.18605 | 0.35229                   | 0.40284   | 0.24487 |
| 45-49     | 0.34933                 | 0.47200   | 0.17867 | 0.30017                   | 0.41791   | 0.28192 |
| 50-54     | 0.34074                 | 0.45556   | 0.20370 | 0.21649                   | 0.43299   | 0.35052 |
| 55-59     | 0.36444                 | 0.42222   | 0.21333 | 0.23656                   | 0.43548   | 0.32796 |

**Table 34. Prevalent rates of lower socioeconomic status population by age group, sex, and body mass index category in 2010 (Oriental region)**

| Age Group | Nutritional State Males |           |         | Nutritional State Females |           |         |
|-----------|-------------------------|-----------|---------|---------------------------|-----------|---------|
|           | Not-Overweigh           | Overweigh | Obese   | Not-Overweigh             | Overweigh | Obese   |
| 0-4       | 0.78523                 | 0.16779   | 0.04698 | 0.81818                   | 0.14015   | 0.04167 |
| 5-9       | 0.81028                 | 0.13834   | 0.05138 | 0.87405                   | 0.09542   | 0.03053 |
| 10-14     | 0.85366                 | 0.12602   | 0.02033 | 0.86000                   | 0.10800   | 0.03200 |
| 15-19     | 0.91358                 | 0.08025   | 0.00617 | 0.81780                   | 0.13983   | 0.04237 |
| 20-24     | 0.81944                 | 0.11111   | 0.06944 | 0.66489                   | 0.25532   | 0.07979 |
| 25-29     | 0.56552                 | 0.35862   | 0.07586 | 0.59551                   | 0.25281   | 0.15169 |
| 30-34     | 0.57143                 | 0.29524   | 0.13333 | 0.45070                   | 0.35915   | 0.19014 |
| 35-39     | 0.56180                 | 0.33708   | 0.10112 | 0.44262                   | 0.37705   | 0.18033 |
| 40-44     | 0.47222                 | 0.38889   | 0.13889 | 0.40909                   | 0.35606   | 0.23485 |
| 45-49     | 0.53012                 | 0.42169   | 0.04819 | 0.39000                   | 0.35000   | 0.26000 |
| 50-54     | 0.59259                 | 0.37037   | 0.03704 | 0.25882                   | 0.42353   | 0.31765 |
| 55-59     | 0.56098                 | 0.39024   | 0.04878 | 0.30000                   | 0.41667   | 0.28333 |

**Table 35. Prevalent rates of middle socioeconomic status population by age group, sex, and body mass index category in 2010 (Oriental region)**

| Age Group | Nutritional State Males |           |         | Nutritional State Females |           |         |
|-----------|-------------------------|-----------|---------|---------------------------|-----------|---------|
|           | Not-Overweigh           | Overweigh | Obese   | Not-Overweigh             | Overweigh | Obese   |
| 0-4       | 0.74843                 | 0.19497   | 0.05660 | 0.77528                   | 0.19101   | 0.03371 |
| 5-9       | 0.80132                 | 0.12914   | 0.06954 | 0.78041                   | 0.16892   | 0.05068 |
| 10-14     | 0.76923                 | 0.15050   | 0.08027 | 0.77852                   | 0.18456   | 0.03691 |
| 15-19     | 0.82258                 | 0.12903   | 0.04839 | 0.80077                   | 0.14943   | 0.04981 |
| 20-24     | 0.75342                 | 0.19178   | 0.05479 | 0.66288                   | 0.26136   | 0.07576 |
| 25-29     | 0.54545                 | 0.33117   | 0.12338 | 0.61927                   | 0.26606   | 0.11468 |
| 30-34     | 0.46203                 | 0.35443   | 0.18354 | 0.53589                   | 0.31579   | 0.14833 |

|       |         |         |         |         |         |         |
|-------|---------|---------|---------|---------|---------|---------|
| 35-39 | 0.39716 | 0.43972 | 0.16312 | 0.39524 | 0.35238 | 0.25238 |
| 40-44 | 0.46400 | 0.36000 | 0.17600 | 0.37173 | 0.40314 | 0.22513 |
| 45-49 | 0.32759 | 0.52586 | 0.14655 | 0.30952 | 0.39524 | 0.29524 |
| 50-54 | 0.33333 | 0.44444 | 0.22222 | 0.19084 | 0.39695 | 0.41221 |
| 55-59 | 0.30357 | 0.50000 | 0.19643 | 0.26667 | 0.40000 | 0.33333 |

**Table 36. Prevalent rates of higher socioeconomic status population by age group, sex, and body mass index category in 2010 (Oriental region)**

| Age Group | Nutritional State Males |           |         | Nutritional State Females |           |         |
|-----------|-------------------------|-----------|---------|---------------------------|-----------|---------|
|           | Not-Overweigh           | Overweigh | Obese   | Not-Overweigh             | Overweigh | Obese   |
| 0-4       | 0.72026                 | 0.20900   | 0.07074 | 0.79530                   | 0.15436   | 0.05034 |
| 5-9       | 0.66465                 | 0.20544   | 0.12991 | 0.78873                   | 0.14930   | 0.06197 |
| 10-14     | 0.67273                 | 0.18961   | 0.13766 | 0.75309                   | 0.18765   | 0.05926 |
| 15-19     | 0.80059                 | 0.14663   | 0.05279 | 0.76271                   | 0.18886   | 0.04843 |
| 20-24     | 0.61411                 | 0.29461   | 0.09129 | 0.70701                   | 0.19427   | 0.09873 |
| 25-29     | 0.46667                 | 0.35238   | 0.18095 | 0.59416                   | 0.26623   | 0.13961 |
| 30-34     | 0.36905                 | 0.38690   | 0.24405 | 0.43878                   | 0.37755   | 0.18367 |
| 35-39     | 0.34459                 | 0.41216   | 0.24324 | 0.38225                   | 0.45051   | 0.16724 |
| 40-44     | 0.30472                 | 0.48927   | 0.20601 | 0.31613                   | 0.42258   | 0.26129 |
| 45-49     | 0.27841                 | 0.46023   | 0.26136 | 0.26280                   | 0.45734   | 0.27986 |
| 50-54     | 0.25000                 | 0.49306   | 0.25694 | 0.21561                   | 0.45353   | 0.33086 |
| 55-59     | 0.32813                 | 0.39844   | 0.27344 | 0.20290                   | 0.45894   | 0.33816 |

**Table 37. Fraction of births for men by body mass index category and socioeconomic status (Oriental region)<sup>†</sup>**

| Population group | Lower SES (%/year) | Middle SES (%/year) | Higher SES (%/year) | Complete Urban Population (%/year) |
|------------------|--------------------|---------------------|---------------------|------------------------------------|
| Not- overweight  | 84,62%             | 76,92%              | 72,22%              | 77,23%                             |
| Overweight       | 7,69%              | 7,69%               | 22,22%              | 12,87%                             |
| Obese            | 7,69%              | 15,38%              | 5,56%               | 9,90%                              |

<sup>†</sup> The fractions of births by each BMI category correspond to the prevalences by BMI category of children aged 0 to 12 months

**Table 38. Fraction of births for women by body mass index category and socioeconomic status (Oriental region)<sup>†</sup>**

| Population group | Lower SES (%/year) | Middle SES (%/year) | Higher SES (%/year) | Complete Urban Population (%/year) |
|------------------|--------------------|---------------------|---------------------|------------------------------------|
| Not- overweight  | 83,33%             | 84,85%              | 69,44%              | 78,49%                             |
| Overweight       | 8,33%              | 15,15%              | 27,78%              | 18,28%                             |
| Obese            | 8,33%              | 0,00%               | 2,78%               | 3,23%                              |

<sup>†</sup> The fractions of births by each BMI category correspond to the prevalences by BMI category of children aged 0 to 12 months

**Table 39. Mortality rates for men and population size by age group without segregate by socioeconomic status (Oriental region)<sup>†</sup>**

| Age group | Mortality rates (R) (%/year) | Not- overweight men in 2005 (Number of people) <sup>1</sup> | Overweight men in 2005 (Number of people) <sup>2</sup> | Obese men in 2005 (Number of people) <sup>3</sup> |
|-----------|------------------------------|-------------------------------------------------------------|--------------------------------------------------------|---------------------------------------------------|
| 0-4       | 0,00339                      | 176247                                                      | 47030                                                  | 18264                                             |
| 5-9       | 0,00029                      | 197520                                                      | 40445                                                  | 16930                                             |
| 10-14     | 0,00035                      | 210874                                                      | 31278                                                  | 19170                                             |
| 15-19     | 0,00119                      | 228039                                                      | 16220                                                  | 3817                                              |
| 20-24     | 0,00239                      | 159170                                                      | 45862                                                  | 10117                                             |
| 25-29     | 0,00273                      | 111185                                                      | 60713                                                  | 18287                                             |
| 30-34     | 0,00293                      | 86676                                                       | 61911                                                  | 19261                                             |
| 35-39     | 0,00283                      | 71920                                                       | 73388                                                  | 24218                                             |
| 40-44     | 0,00288                      | 68349                                                       | 68349                                                  | 23922                                             |
| 45-49     | 0,00380                      | 46710                                                       | 59314                                                  | 25209                                             |
| 50-54     | 0,00630                      | 39542                                                       | 44644                                                  | 20409                                             |
| 55-59     | 0,00831                      | 32484                                                       | 33644                                                  | 15662                                             |

†Values used in this table are for the urban population

<sup>1</sup> Initial value used in the stock of not-overweight population in 2005.

<sup>2</sup> Initial value used in the stock of overweight population in 2005.

<sup>3</sup> Initial value used in the stock of obese population in 2005.

**Table 40. Mortality rates for women and population size by age group without segregate by socioeconomic status (Oriental region)<sup>†</sup>**

| Age group | Mortality rates (R) (%/year) | Not- overweight men in 2005 (Number of people) <sup>1</sup> | Overweight men in 2005 (Number of people) <sup>2</sup> | Obese men in 2005 (Number of people) <sup>3</sup> |
|-----------|------------------------------|-------------------------------------------------------------|--------------------------------------------------------|---------------------------------------------------|
| 0-4       | 0,00279                      | 177602                                                      | 45191                                                  | 9942                                              |
| 5-9       | 0,00025                      | 206793                                                      | 28877                                                  | 12110                                             |
| 10-14     | 0,00022                      | 208082                                                      | 41081                                                  | 6251                                              |
| 15-19     | 0,00048                      | 209006                                                      | 33973                                                  | 8124                                              |
| 20-24     | 0,00057                      | 164005                                                      | 51679                                                  | 10677                                             |
| 25-29     | 0,00062                      | 127221                                                      | 60662                                                  | 16429                                             |
| 30-34     | 0,00074                      | 90686                                                       | 70153                                                  | 27377                                             |
| 35-39     | 0,00093                      | 92379                                                       | 70208                                                  | 32435                                             |
| 40-44     | 0,00157                      | 67232                                                       | 69001                                                  | 46001                                             |
| 45-49     | 0,00211                      | 39405                                                       | 71084                                                  | 39791                                             |
| 50-54     | 0,00362                      | 32546                                                       | 51761                                                  | 34899                                             |
| 55-59     | 0,00537                      | 23408                                                       | 41889                                                  | 29158                                             |

†Values used in this table are for the urban population

<sup>1</sup> Initial value used in the stock of not-overweight population in 2005.

<sup>2</sup> Initial value used in the stock of overweight population in 2005.

<sup>3</sup> Initial value used in the stock of obese population in 2005.

**Table 41. Man mortality rates and population size by age group for the lower socioeconomic status population (Oriental region)<sup>†</sup>**

| Age group | Mortality rates (R) (%/year) | Not- overweight men in 2005 (Number of people) <sup>1</sup> | Overweight men in 2005 (Number of people) <sup>2</sup> | Obese men in 2005 (Number of people) <sup>3</sup> |
|-----------|------------------------------|-------------------------------------------------------------|--------------------------------------------------------|---------------------------------------------------|
| 0-4       | 0,00339                      | 49313                                                       | 10958                                                  | 3196                                              |
| 5-9       | 0,00029                      | 44207                                                       | 8465                                                   | 941                                               |
| 10-14     | 0,00035                      | 38341                                                       | 4036                                                   | 0                                                 |
| 15-19     | 0,00119                      | 49615                                                       | 954                                                    | 954                                               |
| 20-24     | 0,00239                      | 27652                                                       | 6070                                                   | 674                                               |
| 25-29     | 0,00273                      | 23407                                                       | 4389                                                   | 2194                                              |
| 30-34     | 0,00293                      | 18573                                                       | 13070                                                  | 688                                               |
| 35-39     | 0,00283                      | 16879                                                       | 11008                                                  | 734                                               |

|       |         |       |      |      |
|-------|---------|-------|------|------|
| 40-44 | 0,00288 | 19821 | 6835 | 2734 |
| 45-49 | 0,00380 | 8897  | 4449 | 1483 |
| 50-54 | 0,00630 | 6378  | 3189 | 1913 |
| 55-59 | 0,00831 | 9861  | 4060 | 1740 |

†Values used in this table are for the urban population

<sup>1</sup> Initial value used in the stock of not-overweight population in 2005 for lower SES.

<sup>2</sup> Initial value used in the stock of overweight population in 2005 for lower SES.

<sup>3</sup> Initial value used in the stock of obese population in 2005 for lower SES.

**Table 42. Women mortality rates and population size by age group for the lower socioeconomic status population (Oriental region) †**

| Age group | Mortality rates (R) (%/year) | Not- overweight women in 2005 (Number of people) <sup>1</sup> | Overweight women in 2005 (Number of people) <sup>2</sup> | Obese women in 2005 (Number of people) <sup>3</sup> |
|-----------|------------------------------|---------------------------------------------------------------|----------------------------------------------------------|-----------------------------------------------------|
| 0-4       | 0,00279                      | 44740                                                         | 9942                                                     | 3163                                                |
| 5-9       | 0,00025                      | 47506                                                         | 1863                                                     | 2794                                                |
| 10-14     | 0,00022                      | 35722                                                         | 6251                                                     | 893                                                 |
| 15-19     | 0,00048                      | 39143                                                         | 5170                                                     | 739                                                 |
| 20-24     | 0,00057                      | 25626                                                         | 10677                                                    | 1281                                                |
| 25-29     | 0,00062                      | 25697                                                         | 10953                                                    | 3791                                                |
| 30-34     | 0,00074                      | 15399                                                         | 12833                                                    | 1711                                                |
| 35-39     | 0,00093                      | 13959                                                         | 9854                                                     | 4106                                                |
| 40-44     | 0,00157                      | 12827                                                         | 11943                                                    | 7077                                                |
| 45-49     | 0,00211                      | 5022                                                          | 8113                                                     | 4250                                                |
| 50-54     | 0,00362                      | 7058                                                          | 5882                                                     | 4313                                                |
| 55-59     | 0,00537                      | 5339                                                          | 6981                                                     | 4517                                                |

†Values used in this table are for the urban population

<sup>1</sup> Initial value used in the stock of not-overweight population in 2005 for lower SES.

<sup>2</sup> Initial value used in the stock of overweight population in 2005 for lower SES.

<sup>3</sup> Initial value used in the stock of obese population in 2005 for lower SES.

**Table 43. Man mortality rates and population size by age group for the middle socioeconomic status population (Oriental region) †**

| Age group | Mortality rates (R) (%/year) | Not- overweight men in 2005 (Number of people) <sup>1</sup> | Overweight men in 2005 (Number of people) <sup>2</sup> | Obese men in 2005 (Number of people) <sup>3</sup> |
|-----------|------------------------------|-------------------------------------------------------------|--------------------------------------------------------|---------------------------------------------------|
| 0-4       | 0,00339                      | 61184                                                       | 15524                                                  | 7306                                              |
| 5-9       | 0,00029                      | 65840                                                       | 7525                                                   | 4703                                              |
| 10-14     | 0,00035                      | 69619                                                       | 14126                                                  | 7063                                              |
| 15-19     | 0,00119                      | 69652                                                       | 6679                                                   | 954                                               |
| 20-24     | 0,00239                      | 48560                                                       | 14163                                                  | 674                                               |
| 25-29     | 0,00273                      | 35111                                                       | 19019                                                  | 7315                                              |
| 30-34     | 0,00293                      | 26828                                                       | 15822                                                  | 7567                                              |
| 35-39     | 0,00283                      | 23484                                                       | 19081                                                  | 6605                                              |
| 40-44     | 0,00288                      | 19821                                                       | 21872                                                  | 8885                                              |
| 45-49     | 0,00380                      | 15570                                                       | 22243                                                  | 2966                                              |
| 50-54     | 0,00630                      | 15307                                                       | 12118                                                  | 4464                                              |
| 55-59     | 0,00831                      | 8701                                                        | 9861                                                   | 4060                                              |

†Values used in this table are for the urban population

<sup>1</sup> Initial value used in the stock of not-overweight population in 2005 for middle SES.

<sup>2</sup> Initial value used in the stock of overweight population in 2005 for middle SES.

<sup>3</sup> Initial value used in the stock of obese population in 2005 for middle SES.



**Table 44. Women mortality rates and population size by age group for the middle socioeconomic status population (Oriental region) †**

| Age group | Mortality rates (R) (%/year) | Not- overweight women in 2005 (Number of people) <sup>1</sup> | Overweight women in 2005 (Number of people) <sup>2</sup> | Obese women in 2005 (Number of people) <sup>3</sup> |
|-----------|------------------------------|---------------------------------------------------------------|----------------------------------------------------------|-----------------------------------------------------|
| 0-4       | 0,00279                      | 66431                                                         | 14009                                                    | 1356                                                |
| 5-9       | 0,00025                      | 62410                                                         | 8383                                                     | 1863                                                |
| 10-14     | 0,00022                      | 68765                                                         | 7144                                                     | 0                                                   |
| 15-19     | 0,00048                      | 62776                                                         | 8862                                                     | 3693                                                |
| 20-24     | 0,00057                      | 49116                                                         | 17084                                                    | 5979                                                |
| 25-29     | 0,00062                      | 39177                                                         | 20642                                                    | 3370                                                |
| 30-34     | 0,00074                      | 24383                                                         | 23527                                                    | 10694                                               |
| 35-39     | 0,00093                      | 26277                                                         | 25866                                                    | 10675                                               |
| 40-44     | 0,00157                      | 17250                                                         | 16366                                                    | 10173                                               |
| 45-49     | 0,00211                      | 13135                                                         | 18157                                                    | 14294                                               |
| 50-54     | 0,00362                      | 9803                                                          | 10980                                                    | 9803                                                |
| 55-59     | 0,00537                      | 8624                                                          | 11910                                                    | 5339                                                |

†Values used in this table are for the urban population

<sup>1</sup> Initial value used in the stock of not-overweight population in 2005 for middle SES.

<sup>2</sup> Initial value used in the stock of overweight population in 2005 for middle SES.

<sup>3</sup> Initial value used in the stock of obese population in 2005 for middle SES.

**Table 45. Man mortality rates and population size by age group for the higher socioeconomic status population (Oriental region) †**

| Age group | Mortality rates (R) (%/year) | Not- overweight men in 2005 (Number of people) <sup>1</sup> | Overweight men in 2005 (Number of people) <sup>2</sup> | Obese men in 2005 (Number of people) <sup>3</sup> |
|-----------|------------------------------|-------------------------------------------------------------|--------------------------------------------------------|---------------------------------------------------|
| 0-4       | 0,00339                      | 65750                                                       | 20547                                                  | 7762                                              |
| 5-9       | 0,00029                      | 87473                                                       | 24455                                                  | 11287                                             |
| 10-14     | 0,00035                      | 102914                                                      | 13117                                                  | 12108                                             |
| 15-19     | 0,00119                      | 108772                                                      | 8587                                                   | 1908                                              |
| 20-24     | 0,00239                      | 82957                                                       | 25629                                                  | 8768                                              |
| 25-29     | 0,00273                      | 52667                                                       | 37306                                                  | 8778                                              |
| 30-34     | 0,00293                      | 41274                                                       | 33019                                                  | 11006                                             |
| 35-39     | 0,00283                      | 31557                                                       | 43299                                                  | 16879                                             |
| 40-44     | 0,00288                      | 28707                                                       | 39642                                                  | 12303                                             |
| 45-49     | 0,00380                      | 22243                                                       | 32623                                                  | 20760                                             |
| 50-54     | 0,00630                      | 17858                                                       | 29338                                                  | 14031                                             |
| 55-59     | 0,00831                      | 13922                                                       | 19722                                                  | 9861                                              |

†Values used in this table are for the urban population

<sup>1</sup> Initial value used in the stock of not-overweight population in 2005 for higher SES.

<sup>2</sup> Initial value used in the stock of overweight population in 2005 for higher SES.

<sup>3</sup> Initial value used in the stock of obese population in 2005 for higher SES.

**Table 46. Women mortality rates and population size by age group for the higher socioeconomic status population (Oriental region) †**

| Age group | Mortality rates (R) (%/year) | Not- overweight women in 2005 (Number of people) <sup>1</sup> | Overweight women in 2005 (Number of people) <sup>2</sup> | Obese women in 2005 (Number of people) <sup>3</sup> |
|-----------|------------------------------|---------------------------------------------------------------|----------------------------------------------------------|-----------------------------------------------------|
| 0-4       | 0,00279                      | 66431                                                         | 21240                                                    | 5423                                                |
| 5-9       | 0,00025                      | 96876                                                         | 18630                                                    | 7452                                                |
| 10-14     | 0,00022                      | 103594                                                        | 27685                                                    | 5358                                                |
| 15-19     | 0,00048                      | 107088                                                        | 19941                                                    | 3693                                                |
| 20-24     | 0,00057                      | 89263                                                         | 23917                                                    | 3417                                                |
| 25-29     | 0,00062                      | 62347                                                         | 29067                                                    | 9268                                                |

|              |         |       |       |       |
|--------------|---------|-------|-------|-------|
| <b>30-34</b> | 0,00074 | 50904 | 33793 | 14972 |
| <b>35-39</b> | 0,00093 | 52143 | 34488 | 17655 |
| <b>40-44</b> | 0,00157 | 37155 | 40693 | 28751 |
| <b>45-49</b> | 0,00211 | 21248 | 44814 | 21248 |
| <b>50-54</b> | 0,00362 | 15685 | 34899 | 20783 |
| <b>55-59</b> | 0,00537 | 9445  | 22998 | 19302 |

†Values used in this table are for the urban population

<sup>1</sup> Initial value used in the stock of not-overweight population in 2005 for higher SES.

<sup>2</sup> Initial value used in the stock of overweight population in 2005 for higher SES.

<sup>3</sup> Initial value used in the stock of obese population in 2005 for higher SES.

**Table 47. Data and projections of the Fertility rates by department and Region (Oriental region)†**

| Year | Fecundity Rate Dept 15 | Fecundity Rate Depto 25 | Fecundity Rate Depto 50 | Fecundity Rate Depto 54 | Fecundity Rate Depto 68 | Region Average Fecundity Rate |
|------|------------------------|-------------------------|-------------------------|-------------------------|-------------------------|-------------------------------|
| 2005 | 2,8421                 | 2,6459                  | 2,7668                  | 2,7249                  | 2,2912                  | 1,659                         |
| 2006 | 2,7964                 | 2,5891                  | 2,7232                  | 2,6726                  | 2,2568                  | 1,630                         |
| 2007 | 2,7507                 | 2,5323                  | 2,6796                  | 2,6203                  | 2,2224                  | 1,601                         |
| 2008 | 2,705                  | 2,4755                  | 2,636                   | 2,568                   | 2,188                   | 1,572                         |
| 2009 | 2,6708                 | 2,4432                  | 2,6051                  | 2,5373                  | 2,172                   | 1,554                         |
| 2010 | 2,6366                 | 2,4109                  | 2,5742                  | 2,5066                  | 2,156                   | 1,536                         |
| 2011 | 2,6024                 | 2,3786                  | 2,5433                  | 2,4759                  | 2,14                    | 1,518                         |
| 2012 | 2,5682                 | 2,3463                  | 2,5124                  | 2,4452                  | 2,124                   | 1,500                         |
| 2013 | 2,534                  | 2,314                   | 2,4815                  | 2,4145                  | 2,108                   | 1,482                         |
| 2014 | 2,514                  | 2,2986                  | 2,4623                  | 2,3983                  | 2,1014                  | 1,472                         |
| 2015 | 2,494                  | 2,2832                  | 2,4431                  | 2,3821                  | 2,0948                  | 1,462                         |
| 2016 | 2,474                  | 2,2678                  | 2,4239                  | 2,3659                  | 2,0882                  | 1,452                         |
| 2017 | 2,454                  | 2,2524                  | 2,4047                  | 2,3497                  | 2,0816                  | 1,443                         |
| 2018 | 2,434                  | 2,237                   | 2,3855                  | 2,3335                  | 2,075                   | 1,433                         |
| 2019 | 2,414                  | 2,2216                  | 2,3663                  | 2,3173                  | 2,0684                  | 1,423                         |
| 2020 | 2,394                  | 2,2062                  | 2,3471                  | 2,3011                  | 2,0618                  | 1,414                         |
| 2021 | 2,374                  | 2,1908                  | 2,3279                  | 2,2849                  | 2,0552                  | 1,404                         |
| 2022 | 2,354                  | 2,1754                  | 2,3087                  | 2,2687                  | 2,0486                  | 1,394                         |
| 2023 | 2,334                  | 2,16                    | 2,2895                  | 2,2525                  | 2,042                   | 1,385                         |
| 2024 | 2,314                  | 2,1446                  | 2,2703                  | 2,2363                  | 2,0354                  | 1,375                         |
| 2025 | 2,294                  | 2,1292                  | 2,2511                  | 2,2201                  | 2,0288                  | 1,365                         |
| 2026 | 2,274                  | 2,1138                  | 2,2319                  | 2,2039                  | 2,0222                  | 1,356                         |
| 2027 | 2,254                  | 2,0984                  | 2,2127                  | 2,1877                  | 2,0156                  | 1,346                         |
| 2028 | 2,234                  | 2,083                   | 2,1935                  | 2,1715                  | 2,009                   | 1,336                         |
| 2029 | 2,214                  | 2,0676                  | 2,1743                  | 2,1553                  | 2,0024                  | 1,327                         |
| 2030 | 2,194                  | 2,0522                  | 2,1551                  | 2,1391                  | 1,9958                  | 1,317                         |

† Data of Fertility rate of DANE [1] was used to forecast the department's fertility rate from 2005 to 2030. Holt-Winters no seasonal method in EViews 5 (Quantitative Micro Software, LLC) was used to forecast the fertility rate. In the SD model we used data from 2005 to 2030 and the region fertility rate was calculated as the average

of all departments' fertility rates.

**Table 48. Fraction of births by departments, body mass index category, and socioeconomic status (Oriental region) †**

| Population group |                | Lower SES (%/year) | Middle SES (%/year) | Higher SES (%/year) | Complete Urban Population (%/year) |
|------------------|----------------|--------------------|---------------------|---------------------|------------------------------------|
| Department 15    | Not-overweight | 80,00%             | 71,43%              | 77,78%              | 76,92%                             |
|                  | Overweight     | 0,00%              | 14,29%              | 11,11%              | 7,69%                              |
|                  | Obese          | 20,00%             | 14,29%              | 11,11%              | 15,38%                             |
| Department 25    | Not-overweight | 71,43%             | 66,67%              | 57,14%              | 63,33%                             |
|                  | Overweight     | 28,57%             | 33,33%              | 28,57%              | 30,00%                             |
|                  | Obese          | 0,00%              | 0,00%               | 14,29%              | 6,67%                              |
| Department 50    | Not-overweight | 93,33%             | 83,33%              | 65,00%              | 79,25%                             |
|                  | Overweight     | 6,67%              | 5,56%               | 30,00%              | 15,09%                             |
|                  | Obese          | 0,00%              | 11,11%              | 5,00%               | 5,66%                              |
| Department 54    | Not-overweight | 76,47%             | 88,89%              | 77,78%              | 82,26%                             |
|                  | Overweight     | 17,65%             | 3,70%               | 22,22%              | 12,90%                             |
|                  | Obese          | 5,88%              | 7,41%               | 0,00%               | 4,84%                              |
| Department 68    | Not-overweight | 82,14%             | 73,68%              | 72,50%              | 76,87%                             |
|                  | Overweight     | 16,07%             | 18,42%              | 25,00%              | 19,40%                             |
|                  | Obese          | 1,79%              | 7,89%               | 2,50%               | 3,73%                              |

† The fractions of births by each BMI category correspond to the prevalences by BMI category of children aged 0 to 12 months

**Table 49. Prevalent rates of entire population by age group, and body mass index category (Oriental region)**

| Departments   | Age group | Not- overweight in 2005 | Overweight in 2005 | Obese in 2005 | Not- overweight in 2010 | Overweight in 2010 | Obese in 2010 |
|---------------|-----------|-------------------------|--------------------|---------------|-------------------------|--------------------|---------------|
| Department 15 | 0-4       | 0.76978                 | 0.13669            | 0.09353       | 0.69362                 | 0.23404            | 0.07234       |
|               | 5-9       | 0.80000                 | 0.20000            | 0.00000       | 0.80000                 | 0.15094            | 0.04906       |
|               | 10-14     | 0.82667                 | 0.13333            | 0.04000       | 0.78623                 | 0.17391            | 0.03986       |
|               | 15-19     | 0.86842                 | 0.10526            | 0.02632       | 0.82533                 | 0.14410            | 0.03057       |
|               | 20-24     | 0.80000                 | 0.16471            | 0.03529       | 0.70000                 | 0.24706            | 0.05294       |
|               | 25-29     | 0.70238                 | 0.23810            | 0.05952       | 0.60759                 | 0.29114            | 0.10127       |
|               | 30-34     | 0.47436                 | 0.42308            | 0.10256       | 0.46099                 | 0.32624            | 0.21277       |
|               | 35-39     | 0.47297                 | 0.40541            | 0.12162       | 0.45255                 | 0.36496            | 0.18248       |
|               | 40-44     | 0.38889                 | 0.41667            | 0.19444       | 0.33333                 | 0.42963            | 0.23704       |
|               | 45-49     | 0.26667                 | 0.41667            | 0.31667       | 0.32283                 | 0.45669            | 0.22047       |
|               | 50-54     | 0.20000                 | 0.52000            | 0.28000       | 0.18349                 | 0.53211            | 0.28440       |
| 55-59         | 0.20755   | 0.50943                 | 0.28302            | 0.16438       | 0.53425                 | 0.30137            |               |
| Department 25 | 0-4       | 0.73295                 | 0.20455            | 0.06250       | 0.70070                 | 0.25000            | 0.04930       |
|               | 5-9       | 0.75556                 | 0.15556            | 0.08889       | 0.74257                 | 0.20792            | 0.04950       |
|               | 10-14     | 0.75862                 | 0.18391            | 0.05747       | 0.81056                 | 0.14907            | 0.04037       |

| Departments   | Age group | Not- overweight in 2005 | Overweight in 2005 | Obese in 2005 | Not- overweight in 2010 | Overweight in 2010 | Obese in 2010 |
|---------------|-----------|-------------------------|--------------------|---------------|-------------------------|--------------------|---------------|
|               | 15-19     | 0.86585                 | 0.12195            | 0.01220       | 0.83883                 | 0.12454            | 0.03663       |
|               | 20-24     | 0.67939                 | 0.27481            | 0.04580       | 0.72381                 | 0.20476            | 0.07143       |
|               | 25-29     | 0.53175                 | 0.36508            | 0.10317       | 0.59694                 | 0.30102            | 0.10204       |
|               | 30-34     | 0.53659                 | 0.30894            | 0.15447       | 0.49045                 | 0.33758            | 0.17197       |
|               | 35-39     | 0.43119                 | 0.34862            | 0.22018       | 0.36054                 | 0.43537            | 0.20408       |
|               | 40-44     | 0.37037                 | 0.33333            | 0.29630       | 0.34091                 | 0.45455            | 0.20455       |
|               | 45-49     | 0.25581                 | 0.51163            | 0.23256       | 0.28571                 | 0.46429            | 0.25000       |
|               | 50-54     | 0.23881                 | 0.47761            | 0.28358       | 0.21014                 | 0.49275            | 0.29710       |
|               | 55-59     | 0.30303                 | 0.43939            | 0.25758       | 0.23750                 | 0.42500            | 0.33750       |
| Department 50 | 0-4       | 0.74545                 | 0.18636            | 0.06818       | 0.77429                 | 0.16286            | 0.06286       |
|               | 5-9       | 0.79661                 | 0.14407            | 0.05932       | 0.78981                 | 0.13694            | 0.07325       |
|               | 10-14     | 0.84167                 | 0.11667            | 0.04167       | 0.70056                 | 0.22034            | 0.07910       |
|               | 15-19     | 0.88618                 | 0.09756            | 0.01626       | 0.80634                 | 0.15845            | 0.03521       |
|               | 20-24     | 0.71508                 | 0.21788            | 0.06704       | 0.62295                 | 0.25000            | 0.12705       |
|               | 25-29     | 0.59649                 | 0.30994            | 0.09357       | 0.56915                 | 0.25532            | 0.17553       |
|               | 30-34     | 0.48092                 | 0.41985            | 0.09924       | 0.44920                 | 0.37433            | 0.17647       |
|               | 35-39     | 0.47059                 | 0.37908            | 0.15033       | 0.39785                 | 0.41935            | 0.18280       |
|               | 40-44     | 0.37302                 | 0.34127            | 0.28571       | 0.31844                 | 0.39106            | 0.29050       |
|               | 45-49     | 0.29167                 | 0.45833            | 0.25000       | 0.31875                 | 0.46250            | 0.21875       |
| Department 54 | 50-54     | 0.31532                 | 0.37838            | 0.30631       | 0.29245                 | 0.33962            | 0.36792       |
|               | 55-59     | 0.27632                 | 0.46053            | 0.26316       | 0.29412                 | 0.47059            | 0.23529       |
|               | 0-4       | 0.72789                 | 0.23129            | 0.04082       | 0.82582                 | 0.12090            | 0.05328       |
|               | 5-9       | 0.86093                 | 0.06623            | 0.07285       | 0.81076                 | 0.12749            | 0.06175       |
|               | 10-14     | 0.87692                 | 0.09231            | 0.03077       | 0.79412                 | 0.12395            | 0.08193       |
|               | 15-19     | 0.85714                 | 0.11310            | 0.02976       | 0.80420                 | 0.15152            | 0.04429       |
|               | 20-24     | 0.71595                 | 0.23735            | 0.04669       | 0.69333                 | 0.22400            | 0.08267       |
|               | 25-29     | 0.62687                 | 0.28358            | 0.08955       | 0.57423                 | 0.28571            | 0.14006       |
|               | 30-34     | 0.52198                 | 0.34615            | 0.13187       | 0.46926                 | 0.31715            | 0.21359       |
|               | 35-39     | 0.44059                 | 0.43069            | 0.12871       | 0.40418                 | 0.39024            | 0.20557       |
| Department 68 | 40-44     | 0.42857                 | 0.40373            | 0.16770       | 0.42529                 | 0.39847            | 0.17625       |
|               | 45-49     | 0.29630                 | 0.47531            | 0.22840       | 0.35000                 | 0.41923            | 0.23077       |
|               | 50-54     | 0.35200                 | 0.38400            | 0.26400       | 0.31156                 | 0.43719            | 0.25126       |
|               | 55-59     | 0.40566                 | 0.33019            | 0.26415       | 0.30000                 | 0.44118            | 0.25882       |
|               | 0-4       | 0.76744                 | 0.18140            | 0.05116       | 0.80201                 | 0.17293            | 0.02506       |
|               | 5-9       | 0.77670                 | 0.17476            | 0.04854       | 0.75904                 | 0.14458            | 0.09639       |
|               | 10-14     | 0.74436                 | 0.18797            | 0.06767       | 0.76264                 | 0.16264            | 0.07473       |
|               | 15-19     | 0.87417                 | 0.09272            | 0.03311       | 0.72414                 | 0.19540            | 0.08046       |
|               | 20-24     | 0.76650                 | 0.19797            | 0.03553       | 0.72776                 | 0.20755            | 0.06469       |
|               | 25-29     | 0.61350                 | 0.31288            | 0.07362       | 0.51911                 | 0.34076            | 0.14013       |
| Department 68 | 30-34     | 0.45294                 | 0.38235            | 0.16471       | 0.45745                 | 0.40071            | 0.14184       |
|               | 35-39     | 0.47619                 | 0.34524            | 0.17857       | 0.41057                 | 0.41057            | 0.17886       |
|               | 40-44     | 0.37778                 | 0.45556            | 0.16667       | 0.36218                 | 0.41667            | 0.22115       |
|               | 45-49     | 0.31884                 | 0.45652            | 0.22464       | 0.30798                 | 0.41825            | 0.27376       |
|               | 50-54     | 0.34783                 | 0.46957            | 0.18261       | 0.27094                 | 0.41379            | 0.31527       |
|               | 55-59     | 0.25714                 | 0.48571            | 0.25714       | 0.33333                 | 0.36508            | 0.30159       |

**Table 50. Prevalent rates of lower socioeconomic status population by age group, and body mass index category (Oriental region)**

| Departments   | Age group | Not- overweight in 2005 | Overweight in 2005 | Obese in 2005 | Not- overweight in 2010 | Overweight in 2010 | Obese in 2010 |
|---------------|-----------|-------------------------|--------------------|---------------|-------------------------|--------------------|---------------|
| Department 15 | 0-4       | 0.74468                 | 0.12766            | 0.12766       | 0.69697                 | 0.21212            | 0.09091       |
|               | 5-9       | 0.77778                 | 0.22222            | 0.00000       | 0.84444                 | 0.13333            | 0.02222       |
|               | 10-14     | 0.83333                 | 0.16667            | 0.00000       | 0.77778                 | 0.20000            | 0.02222       |
|               | 15-19     | 0.80000                 | 0.13333            | 0.06667       | 0.84615                 | 0.12821            | 0.02564       |
|               | 20-24     | 0.72222                 | 0.22222            | 0.05556       | 0.66667                 | 0.29630            | 0.03704       |
|               | 25-29     | 0.76471                 | 0.17647            | 0.05882       | 0.58824                 | 0.23529            | 0.17647       |
|               | 30-34     | 0.55556                 | 0.44444            | 0.00000       | 0.33333                 | 0.33333            | 0.33333       |
|               | 35-39     | 0.45455                 | 0.45455            | 0.09091       | 0.56522                 | 0.21739            | 0.21739       |
|               | 40-44     | 0.44444                 | 0.38889            | 0.16667       | 0.40000                 | 0.40000            | 0.20000       |
|               | 45-49     | 0.12500                 | 0.37500            | 0.50000       | 0.52941                 | 0.41176            | 0.05882       |
|               | 50-54     | 0.60000                 | 0.20000            | 0.20000       | 0.11111                 | 0.44444            | 0.44444       |
|               | 55-59     | 0.08333                 | 0.66667            | 0.25000       | 0.33333                 | 0.33333            | 0.33333       |
| Department 25 | 0-4       | 0.75000                 | 0.20000            | 0.05000       | 0.71642                 | 0.23881            | 0.04478       |
|               | 5-9       | 0.87500                 | 0.12500            | 0.00000       | 0.75000                 | 0.18750            | 0.06250       |
|               | 10-14     | 0.86667                 | 0.13333            | 0.00000       | 0.89091                 | 0.09091            | 0.01818       |
|               | 15-19     | 0.66667                 | 0.00000            | 0.33333       | 0.81818                 | 0.12121            | 0.06061       |
|               | 20-24     | 0.70588                 | 0.23529            | 0.05882       | 0.90909                 | 0.06061            | 0.03030       |
|               | 25-29     | 0.43478                 | 0.39130            | 0.17391       | 0.54545                 | 0.36364            | 0.09091       |
|               | 30-34     | 0.50000                 | 0.37500            | 0.12500       | 0.62963                 | 0.25926            | 0.11111       |
|               | 35-39     | 0.41176                 | 0.41176            | 0.17647       | 0.30000                 | 0.50000            | 0.20000       |
|               | 40-44     | 0.47059                 | 0.35294            | 0.17647       | 0.64706                 | 0.05882            | 0.29412       |
|               | 45-49     | 0.22222                 | 0.55556            | 0.22222       | 0.38889                 | 0.27778            | 0.33333       |
|               | 50-54     | 0.16667                 | 0.50000            | 0.33333       | 0.40000                 | 0.35000            | 0.25000       |
|               | 55-59     | 0.28571                 | 0.28571            | 0.42857       | 0.33333                 | 0.50000            | 0.16667       |
| Department 50 | 0-4       | 0.80328                 | 0.13115            | 0.06557       | 0.76866                 | 0.18657            | 0.04478       |
|               | 5-9       | 0.94737                 | 0.00000            | 0.05263       | 0.84167                 | 0.12500            | 0.03333       |
|               | 10-14     | 0.93750                 | 0.06250            | 0.00000       | 0.80672                 | 0.16807            | 0.02521       |
|               | 15-19     | 0.86364                 | 0.13636            | 0.00000       | 0.84404                 | 0.13761            | 0.01835       |
|               | 20-24     | 0.75000                 | 0.21875            | 0.03125       | 0.67647                 | 0.22059            | 0.10294       |
|               | 25-29     | 0.59459                 | 0.27027            | 0.13514       | 0.49254                 | 0.35821            | 0.14925       |
|               | 30-34     | 0.48148                 | 0.48148            | 0.03704       | 0.50000                 | 0.42593            | 0.07407       |
|               | 35-39     | 0.61905                 | 0.28571            | 0.09524       | 0.48077                 | 0.44231            | 0.07692       |
|               | 40-44     | 0.68421                 | 0.21053            | 0.10526       | 0.34000                 | 0.36000            | 0.30000       |
|               | 45-49     | 0.43750                 | 0.50000            | 0.06250       | 0.40426                 | 0.40426            | 0.19149       |
|               | 50-54     | 0.50000                 | 0.28571            | 0.21429       | 0.27273                 | 0.50000            | 0.22727       |
|               | 55-59     | 0.71429                 | 0.21429            | 0.07143       | 0.47619                 | 0.42857            | 0.09524       |
| Department 54 | 0-4       | 0.74713                 | 0.24138            | 0.01149       | 0.83544                 | 0.10970            | 0.05485       |
|               | 5-9       | 0.92857                 | 0.02381            | 0.04762       | 0.88889                 | 0.08213            | 0.02899       |
|               | 10-14     | 0.92593                 | 0.07407            | 0.00000       | 0.87879                 | 0.08081            | 0.04040       |
|               | 15-19     | 0.92857                 | 0.04762            | 0.02381       | 0.88194                 | 0.09722            | 0.02083       |
|               | 20-24     | 0.70833                 | 0.27083            | 0.02083       | 0.72603                 | 0.20548            | 0.06849       |

| Departments   | Age group | Not- overweight in 2005 | Overweight in 2005 | Obese in 2005 | Not- overweight in 2010 | Overweight in 2010 | Obese in 2010 |
|---------------|-----------|-------------------------|--------------------|---------------|-------------------------|--------------------|---------------|
|               | 25-29     | 0.77778                 | 0.20000            | 0.02222       | 0.60000                 | 0.28750            | 0.11250       |
|               | 30-34     | 0.62162                 | 0.35135            | 0.02703       | 0.47706                 | 0.30275            | 0.22018       |
|               | 35-39     | 0.50000                 | 0.42500            | 0.07500       | 0.50000                 | 0.36585            | 0.13415       |
|               | 40-44     | 0.40000                 | 0.40000            | 0.20000       | 0.47297                 | 0.36486            | 0.16216       |
|               | 45-49     | 0.43478                 | 0.30435            | 0.26087       | 0.43056                 | 0.44444            | 0.12500       |
|               | 50-54     | 0.45000                 | 0.35000            | 0.20000       | 0.46032                 | 0.44444            | 0.09524       |
|               | 55-59     | 0.46429                 | 0.32143            | 0.21429       | 0.35417                 | 0.43750            | 0.20833       |
| Department 68 | 0-4       | 0.87500                 | 0.09375            | 0.03125       | 0.85714                 | 0.14286            | 0.00000       |
|               | 5-9       | 0.72222                 | 0.22222            | 0.05556       | 0.78947                 | 0.13684            | 0.07368       |
|               | 10-14     | 0.75000                 | 0.20000            | 0.05000       | 0.89873                 | 0.10127            | 0.00000       |
|               | 15-19     | 0.96429                 | 0.03571            | 0.00000       | 0.84722                 | 0.11111            | 0.04167       |
|               | 20-24     | 0.75000                 | 0.25000            | 0.00000       | 0.74138                 | 0.15517            | 0.10345       |
|               | 25-29     | 0.86667                 | 0.06667            | 0.06667       | 0.67391                 | 0.23913            | 0.08696       |
|               | 30-34     | 0.47368                 | 0.47368            | 0.05263       | 0.53333                 | 0.33333            | 0.13333       |
|               | 35-39     | 0.66667                 | 0.22222            | 0.11111       | 0.55882                 | 0.23529            | 0.20588       |
|               | 40-44     | 0.61905                 | 0.19048            | 0.19048       | 0.39583                 | 0.47917            | 0.12500       |
|               | 45-49     | 0.55556                 | 0.44444            | 0.00000       | 0.58621                 | 0.24138            | 0.17241       |
|               | 50-54     | 0.47059                 | 0.29412            | 0.23529       | 0.40000                 | 0.24000            | 0.36000       |
|               | 55-59     | 0.57143                 | 0.28571            | 0.14286       | 0.50000                 | 0.30000            | 0.20000       |

**Table 51. Prevalent rates of middle socioeconomic status population by age group, and body mass index category (Oriental region)**

| Departments   | Age group     | Not- overweight in 2005 | Overweight in 2005 | Obese in 2005 | Not- overweight in 2010 | Overweight in 2010 | Obese in 2010 |
|---------------|---------------|-------------------------|--------------------|---------------|-------------------------|--------------------|---------------|
| Department 15 | 0-4           | 0.76190                 | 0.14286            | 0.09524       | 0.67619                 | 0.26667            | 0.05714       |
|               | 5-9           | 0.83333                 | 0.16667            | 0.00000       | 0.77778                 | 0.17094            | 0.05128       |
|               | 10-14         | 0.80952                 | 0.14286            | 0.04762       | 0.84906                 | 0.11321            | 0.03774       |
|               | 15-19         | 0.95238                 | 0.00000            | 0.04762       | 0.82143                 | 0.13095            | 0.04762       |
|               | 20-24         | 0.70000                 | 0.25000            | 0.05000       | 0.71233                 | 0.27397            | 0.01370       |
|               | 25-29         | 0.70370                 | 0.25926            | 0.03704       | 0.67164                 | 0.29851            | 0.02985       |
|               | 30-34         | 0.41667                 | 0.45833            | 0.12500       | 0.47761                 | 0.28358            | 0.23881       |
|               | 35-39         | 0.47619                 | 0.42857            | 0.09524       | 0.47619                 | 0.28571            | 0.23810       |
|               | 40-44         | 0.37500                 | 0.43750            | 0.18750       | 0.34146                 | 0.48780            | 0.17073       |
|               | 45-49         | 0.42105                 | 0.21053            | 0.36842       | 0.30000                 | 0.46000            | 0.24000       |
|               | 50-54         | 0.42857                 | 0.57143            | 0.00000       | 0.25000                 | 0.43182            | 0.31818       |
|               | 55-59         | 0.37500                 | 0.50000            | 0.12500       | 0.13636                 | 0.45455            | 0.40909       |
|               | Department 25 | 0-4                     | 0.72414            | 0.22414       | 0.05172                 | 0.70330            | 0.26374       |
| 5-9           |               | 0.78947                 | 0.15789            | 0.05263       | 0.74775                 | 0.18919            | 0.06306       |
| 10-14         |               | 0.77778                 | 0.14815            | 0.07407       | 0.78889                 | 0.18889            | 0.02222       |
| 15-19         |               | 0.95652                 | 0.04348            | 0.00000       | 0.84722                 | 0.13889            | 0.01389       |
| 20-24         |               | 0.71154                 | 0.25000            | 0.03846       | 0.69444                 | 0.20833            | 0.09722       |
| 25-29         |               | 0.58974                 | 0.35897            | 0.05128       | 0.54098                 | 0.36066            | 0.09836       |
| 30-34         |               | 0.48649                 | 0.32432            | 0.18919       | 0.52632                 | 0.31579            | 0.15789       |
| 35-39         |               | 0.40741                 | 0.37037            | 0.22222       | 0.35593                 | 0.40678            | 0.23729       |
| 40-44         | 0.40741       | 0.37037                 | 0.22222            | 0.39583       | 0.45833                 | 0.14583            |               |

| Departments   | Age group     | Not- overweight in 2005 | Overweight in 2005 | Obese in 2005 | Not- overweight in 2010 | Overweight in 2010 | Obese in 2010 |
|---------------|---------------|-------------------------|--------------------|---------------|-------------------------|--------------------|---------------|
|               | 45-49         | 0.23077                 | 0.61538            | 0.15385       | 0.33333                 | 0.42105            | 0.24561       |
|               | 50-54         | 0.48000                 | 0.36000            | 0.16000       | 0.26923                 | 0.50000            | 0.23077       |
|               | 55-59         | 0.33333                 | 0.44444            | 0.22222       | 0.22222                 | 0.44444            | 0.33333       |
| Department 50 | 0-4           | 0.77922                 | 0.15584            | 0.06494       | 0.79817                 | 0.15596            | 0.04587       |
|               | 5-9           | 0.75676                 | 0.13514            | 0.10811       | 0.81188                 | 0.11881            | 0.06931       |
|               | 10-14         | 0.84211                 | 0.10526            | 0.05263       | 0.70732                 | 0.21951            | 0.07317       |
|               | 15-19         | 0.89474                 | 0.10526            | 0.00000       | 0.84146                 | 0.10976            | 0.04878       |
|               | 20-24         | 0.62500                 | 0.25000            | 0.12500       | 0.68421                 | 0.25263            | 0.06316       |
|               | 25-29         | 0.57407                 | 0.31481            | 0.11111       | 0.63793                 | 0.18966            | 0.17241       |
|               | 30-34         | 0.41379                 | 0.44828            | 0.13793       | 0.47273                 | 0.36364            | 0.16364       |
|               | 35-39         | 0.42553                 | 0.38298            | 0.19149       | 0.40000                 | 0.41538            | 0.18462       |
|               | 40-44         | 0.36111                 | 0.33333            | 0.30556       | 0.33929                 | 0.37500            | 0.28571       |
|               | 45-49         | 0.33333                 | 0.41026            | 0.25641       | 0.31915                 | 0.48936            | 0.19149       |
|               | 50-54         | 0.20000                 | 0.43333            | 0.36667       | 0.25926                 | 0.18519            | 0.55556       |
|               | 55-59         | 0.31818                 | 0.54545            | 0.13636       | 0.27273                 | 0.50000            | 0.22727       |
|               | Department 54 | 0-4                     | 0.79091            | 0.18182       | 0.02727                 | 0.82682            | 0.11732       |
| 5-9           |               | 0.94444                 | 0.03704            | 0.01852       | 0.80645                 | 0.14516            | 0.04839       |
| 10-14         |               | 0.89286                 | 0.10714            | 0.00000       | 0.79070                 | 0.12791            | 0.08140       |
| 15-19         |               | 0.84127                 | 0.12698            | 0.03175       | 0.78363                 | 0.15789            | 0.05848       |
| 20-24         |               | 0.73118                 | 0.23656            | 0.03226       | 0.69014                 | 0.21127            | 0.09859       |
| 25-29         |               | 0.60606                 | 0.30303            | 0.09091       | 0.55738                 | 0.28689            | 0.15574       |
| 30-34         |               | 0.55882                 | 0.27941            | 0.16176       | 0.54032                 | 0.30645            | 0.15323       |
| 35-39         |               | 0.43421                 | 0.43421            | 0.13158       | 0.37879                 | 0.40152            | 0.21970       |
| 40-44         |               | 0.40000                 | 0.45455            | 0.14545       | 0.46226                 | 0.32075            | 0.21698       |
| 45-49         |               | 0.36364                 | 0.41818            | 0.21818       | 0.27184                 | 0.44660            | 0.28155       |
| 50-54         |               | 0.42105                 | 0.26316            | 0.31579       | 0.25000                 | 0.42647            | 0.32353       |
| 55-59         |               | 0.45455                 | 0.36364            | 0.18182       | 0.32308                 | 0.43077            | 0.24615       |
| Department 68 |               | 0-4                     | 0.769231           | 0.179487      | 0.051282                | 0.74257            | 0.22772       |
|               | 5-9           | 0.851852                | 0.111111           | 0.037037      | 0.80723                 | 0.10843            | 0.08434       |
|               | 10-14         | 0.787879                | 0.151515           | 0.060606      | 0.73585                 | 0.20755            | 0.05660       |
|               | 15-19         | 0.763158                | 0.157895           | 0.078947      | 0.72603                 | 0.19178            | 0.08219       |
|               | 20-24         | 0.760000                | 0.180000           | 0.060000      | 0.74257                 | 0.21782            | 0.03960       |
|               | 25-29         | 0.583333                | 0.354167           | 0.062500      | 0.56250                 | 0.32813            | 0.10938       |
|               | 30-34         | 0.346154                | 0.442308           | 0.211538      | 0.46875                 | 0.42188            | 0.10938       |
|               | 35-39         | 0.448980                | 0.387755           | 0.163265      | 0.41509                 | 0.37736            | 0.20755       |
|               | 40-44         | 0.410256                | 0.384615           | 0.205128      | 0.43077                 | 0.38462            | 0.18462       |
|               | 45-49         | 0.235294                | 0.529412           | 0.235294      | 0.37681                 | 0.40580            | 0.21739       |
|               | 50-54         | 0.428571                | 0.392857           | 0.178571      | 0.18421                 | 0.47368            | 0.34211       |
|               | 55-59         | 0.153846                | 0.461538           | 0.384615      | 0.32353                 | 0.38235            | 0.29412       |

**Table 52. Prevalent rates of higher socioeconomic status population by age group, and body mass index category (Oriental region)**

| Departments      | Age group | Not- overweight<br>in 2005 | Overweight<br>in 2005 | Obese in<br>2005 | Not- overweight<br>in 2010 | Overweight<br>in 2010 | Obese in<br>2010 |
|------------------|-----------|----------------------------|-----------------------|------------------|----------------------------|-----------------------|------------------|
| Department<br>15 | 0-4       | 0.80000                    | 0.14000               | 0.06000          | 0.71134                    | 0.20619               | 0.08247          |
|                  | 5-9       | 0.78788                    | 0.21212               | 0.00000          | 0.80583                    | 0.13592               | 0.05825          |
|                  | 10-14     | 0.83333                    | 0.11905               | 0.04762          | 0.73600                    | 0.21600               | 0.04800          |
|                  | 15-19     | 0.85000                    | 0.15000               | 0.00000          | 0.82075                    | 0.16038               | 0.01887          |
|                  | 20-24     | 0.87234                    | 0.10638               | 0.02128          | 0.70000                    | 0.20000               | 0.10000          |
|                  | 25-29     | 0.67500                    | 0.25000               | 0.07500          | 0.55405                    | 0.29730               | 0.14865          |
|                  | 30-34     | 0.47222                    | 0.38889               | 0.13889          | 0.46774                    | 0.37097               | 0.16129          |
|                  | 35-39     | 0.47619                    | 0.38095               | 0.14286          | 0.40278                    | 0.45833               | 0.13889          |
|                  | 40-44     | 0.36842                    | 0.42105               | 0.21053          | 0.31646                    | 0.40506               | 0.27848          |
|                  | 45-49     | 0.21212                    | 0.54545               | 0.24242          | 0.28333                    | 0.46667               | 0.25000          |
|                  | 50-54     | 0.10526                    | 0.55263               | 0.34211          | 0.14286                    | 0.62500               | 0.23214          |
| 55-59            | 0.16000   | 0.44000                    | 0.40000               | 0.15556          | 0.60000                    | 0.24444               |                  |
| Department<br>25 | 0-4       | 0.73077                    | 0.19231               | 0.07692          | 0.69048                    | 0.24603               | 0.06349          |
|                  | 5-9       | 0.70909                    | 0.16364               | 0.12727          | 0.73611                    | 0.22917               | 0.03472          |
|                  | 10-14     | 0.71111                    | 0.22222               | 0.06667          | 0.79661                    | 0.14689               | 0.05650          |
|                  | 15-19     | 0.80392                    | 0.17647               | 0.01961          | 0.83929                    | 0.11905               | 0.04167          |
|                  | 20-24     | 0.64516                    | 0.30645               | 0.04839          | 0.68571                    | 0.24762               | 0.06667          |
|                  | 25-29     | 0.53125                    | 0.35938               | 0.10938          | 0.64706                    | 0.24510               | 0.10784          |
|                  | 30-34     | 0.57143                    | 0.28571               | 0.14286          | 0.41096                    | 0.38356               | 0.20548          |
|                  | 35-39     | 0.44615                    | 0.32308               | 0.23077          | 0.38235                    | 0.44118               | 0.17647          |
|                  | 40-44     | 0.32813                    | 0.31250               | 0.35938          | 0.27027                    | 0.51351               | 0.21622          |
|                  | 45-49     | 0.27451                    | 0.45098               | 0.27451          | 0.23656                    | 0.52688               | 0.23656          |
|                  | 50-54     | 0.08333                    | 0.55556               | 0.36111          | 0.15217                    | 0.52174               | 0.32609          |
| 55-59            | 0.29268   | 0.46341                    | 0.24390               | 0.23214          | 0.41071                    | 0.35714               |                  |
| Department<br>50 | 0-4       | 0.67073                    | 0.25610               | 0.07317          | 0.75701                    | 0.14019               | 0.10280          |
|                  | 5-9       | 0.77419                    | 0.19355               | 0.03226          | 0.69892                    | 0.17204               | 0.12903          |
|                  | 10-14     | 0.81818                    | 0.13636               | 0.04545          | 0.58036                    | 0.27679               | 0.14286          |
|                  | 15-19     | 0.90411                    | 0.06849               | 0.02740          | 0.73118                    | 0.22581               | 0.04301          |
|                  | 20-24     | 0.74747                    | 0.20202               | 0.05051          | 0.50617                    | 0.27160               | 0.22222          |
|                  | 25-29     | 0.61250                    | 0.32500               | 0.06250          | 0.58730                    | 0.20635               | 0.20635          |
|                  | 30-34     | 0.50667                    | 0.38667               | 0.10667          | 0.39744                    | 0.34615               | 0.25641          |
|                  | 35-39     | 0.45882                    | 0.40000               | 0.14118          | 0.33333                    | 0.40580               | 0.26087          |
|                  | 40-44     | 0.29577                    | 0.38028               | 0.32394          | 0.28767                    | 0.42466               | 0.28767          |
|                  | 45-49     | 0.23077                    | 0.47692               | 0.29231          | 0.25758                    | 0.48485               | 0.25758          |
|                  | 50-54     | 0.32836                    | 0.37313               | 0.29851          | 0.31579                    | 0.35088               | 0.33333          |
| 55-59            | 0.10000   | 0.50000                    | 0.40000               | 0.21429          | 0.47619                    | 0.30952               |                  |
| Department<br>54 | 0-4       | 0.63918                    | 0.27835               | 0.08247          | 0.79167                    | 0.16667               | 0.04167          |
|                  | 5-9       | 0.72727                    | 0.12727               | 0.14545          | 0.66972                    | 0.18349               | 0.14679          |
|                  | 10-14     | 0.82979                    | 0.08511               | 0.08511          | 0.64151                    | 0.19811               | 0.16038          |
|                  | 15-19     | 0.82540                    | 0.14286               | 0.03175          | 0.73684                    | 0.21053               | 0.05263          |
|                  | 20-24     | 0.70690                    | 0.22414               | 0.06897          | 0.64368                    | 0.27586               | 0.08046          |
|                  | 25-29     | 0.56667                    | 0.31111               | 0.12222          | 0.54667                    | 0.28000               | 0.17333          |
|                  | 30-34     | 0.44156                    | 0.40260               | 0.15584          | 0.34211                    | 0.35526               | 0.30263          |
|                  | 35-39     | 0.41860                    | 0.43023               | 0.15116          | 0.34247                    | 0.39726               | 0.26027          |
| 40-44            | 0.46970   | 0.36364                    | 0.16667               | 0.33333          | 0.53086                    | 0.13580               |                  |



| Departments   | Age group | Not- overweight in 2005 | Overweight in 2005 | Obese in 2005 | Not- overweight in 2010 | Overweight in 2010 | Obese in 2010 |
|---------------|-----------|-------------------------|--------------------|---------------|-------------------------|--------------------|---------------|
|               | 45-49     | 0.21429                 | 0.55952            | 0.22619       | 0.37647                 | 0.36471            | 0.25882       |
|               | 50-54     | 0.28358                 | 0.46269            | 0.25373       | 0.23529                 | 0.44118            | 0.32353       |
|               | 55-59     | 0.33333                 | 0.31111            | 0.35556       | 0.22807                 | 0.45614            | 0.31579       |
| Department 68 | 0-4       | 0.73333                 | 0.20952            | 0.05714       | 0.80676                 | 0.15942            | 0.03382       |
|               | 5-9       | 0.75862                 | 0.18966            | 0.05172       | 0.72996                 | 0.16034            | 0.10970       |
|               | 10-14     | 0.72500                 | 0.20000            | 0.07500       | 0.73333                 | 0.16296            | 0.10370       |
|               | 15-19     | 0.89412                 | 0.08235            | 0.02353       | 0.69484                 | 0.21596            | 0.08920       |
|               | 20-24     | 0.77236                 | 0.19512            | 0.03252       | 0.71698                 | 0.21698            | 0.06604       |
|               | 25-29     | 0.59000                 | 0.33000            | 0.08000       | 0.47059                 | 0.36765            | 0.16176       |
|               | 30-34     | 0.50505                 | 0.33333            | 0.16162       | 0.43353                 | 0.41040            | 0.15607       |
|               | 35-39     | 0.45545                 | 0.34653            | 0.19802       | 0.37736                 | 0.45912            | 0.16352       |
|               | 40-44     | 0.32500                 | 0.52500            | 0.15000       | 0.33166                 | 0.41206            | 0.25628       |
|               | 45-49     | 0.32632                 | 0.43158            | 0.24211       | 0.23030                 | 0.45455            | 0.31515       |
|               | 50-54     | 0.28571                 | 0.54286            | 0.17143       | 0.27143                 | 0.42857            | 0.30000       |
|               | 55-59     | 0.24000                 | 0.52000            | 0.24000       | 0.31111                 | 0.37037            | 0.31852       |

**Table 53. Mortality rates for departments and population size by age group without segregate by socioeconomic status (Oriental region) †**

| Departments   | Age group | Mortality rates (R) (%/year) | Not- overweight population in 2005 (Number of people)1 | Overweight population in 2005 (Number of people)2 | Obese population in 2005 (Number of people)3 |
|---------------|-----------|------------------------------|--------------------------------------------------------|---------------------------------------------------|----------------------------------------------|
| Department 15 | 0-4       | 0.00348                      | 46632                                                  | 8280                                              | 5666                                         |
|               | 5-9       | 0.00037                      | 51323                                                  | 12831                                             | 0                                            |
|               | 10-14     | 0.00029                      | 54874                                                  | 8851                                              | 2655                                         |
|               | 15-19     | 0.00083                      | 53331                                                  | 6464                                              | 1616                                         |
|               | 20-24     | 0.00120                      | 42790                                                  | 8810                                              | 1888                                         |
|               | 25-29     | 0.00147                      | 33519                                                  | 11362                                             | 2841                                         |
|               | 30-34     | 0.00137                      | 21103                                                  | 18822                                             | 4563                                         |
|               | 35-39     | 0.00166                      | 21422                                                  | 18362                                             | 5509                                         |
|               | 40-44     | 0.00231                      | 16324                                                  | 17490                                             | 8162                                         |
|               | 45-49     | 0.00247                      | 9627                                                   | 15043                                             | 11433                                        |
|               | 50-54     | 0.00445                      | 6016                                                   | 15643                                             | 8423                                         |
|               | 55-59     | 0.00649                      | 4990                                                   | 12248                                             | 6805                                         |
| Department 25 | 0-4       | 0.00328                      | 99214                                                  | 27688                                             | 8460                                         |
|               | 5-9       | 0.00020                      | 106953                                                 | 22020                                             | 12583                                        |
|               | 10-14     | 0.00031                      | 112889                                                 | 27367                                             | 8552                                         |
|               | 15-19     | 0.00068                      | 128656                                                 | 18121                                             | 1812                                         |
|               | 20-24     | 0.00119                      | 83108                                                  | 33617                                             | 5603                                         |
|               | 25-29     | 0.00124                      | 57872                                                  | 39733                                             | 11229                                        |
|               | 30-34     | 0.00131                      | 53493                                                  | 30799                                             | 15400                                        |
|               | 35-39     | 0.00136                      | 46239                                                  | 37385                                             | 23611                                        |
|               | 40-44     | 0.00157                      | 38320                                                  | 34488                                             | 30656                                        |
|               | 45-49     | 0.00250                      | 21473                                                  | 42945                                             | 19520                                        |
| 50-54         | 0.00391   | 15822                        | 31643                                                  | 18788                                             |                                              |

| Departments   | Age group | Mortality rates (R) (%/year) | Not- overweight population in 2005 (Number of people) <sup>1</sup> | Overweight population in 2005 (Number of people) <sup>2</sup> | Obese population in 2005 (Number of people) <sup>3</sup> |
|---------------|-----------|------------------------------|--------------------------------------------------------------------|---------------------------------------------------------------|----------------------------------------------------------|
|               | 55-59     | 0.00605                      | 15582                                                              | 22594                                                         | 13245                                                    |
| Department 50 | 0-4       | 0.00387                      | 43508                                                              | 10877                                                         | 3979                                                     |
|               | 5-9       | 0.00043                      | 46087                                                              | 8335                                                          | 3432                                                     |
|               | 10-14     | 0.00045                      | 50731                                                              | 7032                                                          | 2511                                                     |
|               | 15-19     | 0.00087                      | 51970                                                              | 5721                                                          | 954                                                      |
|               | 20-24     | 0.00204                      | 37181                                                              | 11329                                                         | 3486                                                     |
|               | 25-29     | 0.00231                      | 28361                                                              | 14737                                                         | 4449                                                     |
|               | 30-34     | 0.00221                      | 20217                                                              | 17650                                                         | 4172                                                     |
|               | 35-39     | 0.00245                      | 19584                                                              | 15776                                                         | 6256                                                     |
|               | 40-44     | 0.00312                      | 14121                                                              | 12919                                                         | 10816                                                    |
|               | 45-49     | 0.00332                      | 8880                                                               | 13954                                                         | 7611                                                     |
|               | 50-54     | 0.00537                      | 7335                                                               | 8803                                                          | 7126                                                     |
|               | 55-59     | 0.00707                      | 4965                                                               | 8274                                                          | 4728                                                     |
| Department 54 | 0-4       | 0.00288                      | 71295                                                              | 22654                                                         | 3998                                                     |
|               | 5-9       | 0.00027                      | 89750                                                              | 6904                                                          | 7594                                                     |
|               | 10-14     | 0.00025                      | 86793                                                              | 9136                                                          | 3045                                                     |
|               | 15-19     | 0.00112                      | 79891                                                              | 10541                                                         | 2774                                                     |
|               | 20-24     | 0.00208                      | 61394                                                              | 20353                                                         | 4004                                                     |
|               | 25-29     | 0.00221                      | 46821                                                              | 21181                                                         | 6689                                                     |
|               | 30-34     | 0.00286                      | 34368                                                              | 22791                                                         | 8682                                                     |
|               | 35-39     | 0.00251                      | 28618                                                              | 27975                                                         | 8360                                                     |
|               | 40-44     | 0.00310                      | 25813                                                              | 24316                                                         | 10101                                                    |
|               | 45-49     | 0.00390                      | 14831                                                              | 23792                                                         | 11433                                                    |
|               | 50-54     | 0.00619                      | 14055                                                              | 15332                                                         | 10541                                                    |
|               | 55-59     | 0.00799                      | 12591                                                              | 10249                                                         | 8199                                                     |
| Department 68 | 0-4       | 0.00252                      | 93646                                                              | 22135                                                         | 6243                                                     |
|               | 5-9       | 0.00024                      | 104748                                                             | 23568                                                         | 6547                                                     |
|               | 10-14     | 0.00022                      | 105922                                                             | 26748                                                         | 9629                                                     |
|               | 15-19     | 0.00079                      | 120047                                                             | 12732                                                         | 4547                                                     |
|               | 20-24     | 0.00119                      | 98073                                                              | 25330                                                         | 4546                                                     |
|               | 25-29     | 0.00143                      | 70983                                                              | 36202                                                         | 8518                                                     |
|               | 30-34     | 0.00151                      | 47108                                                              | 39766                                                         | 17130                                                    |
|               | 35-39     | 0.00166                      | 50215                                                              | 36406                                                         | 18831                                                    |
|               | 40-44     | 0.00186                      | 37523                                                              | 45249                                                         | 16554                                                    |
|               | 45-49     | 0.00273                      | 25817                                                              | 36965                                                         | 18189                                                    |
|               | 50-54     | 0.00506                      | 22356                                                              | 30181                                                         | 11737                                                    |
|               | 55-59     | 0.00666                      | 13314                                                              | 25148                                                         | 13314                                                    |

†Values used in this table are for the urban population

<sup>1</sup> Initial value used in the stock of not-overweight population in 2005.

<sup>2</sup> Initial value used in the stock of overweight population in 2005.

<sup>3</sup> Initial value used in the stock of obese population in 2005.

**Table 54. Mortality rates and population size by age group at the department level for the lower socioeconomic status population (Oriental region) †**

| Departments   | Age group | Mortality rates (R) (%/year) | Not- overweight population in 2005 (Number of people)1 | Overweight population in 2005 (Number of people)2 | Obese population in 2005 (Number of people)3 |
|---------------|-----------|------------------------------|--------------------------------------------------------|---------------------------------------------------|----------------------------------------------|
| Department 15 | 0-4       | 0.00348                      | 15253                                                  | 2615                                              | 2615                                         |
|               | 5-9       | 0.00037                      | 11975                                                  | 3422                                              | 0                                            |
|               | 10-14     | 0.00029                      | 8851                                                   | 1770                                              | 0                                            |
|               | 15-19     | 0.00083                      | 9697                                                   | 1616                                              | 808                                          |
|               | 20-24     | 0.00120                      | 8180                                                   | 2517                                              | 629                                          |
|               | 25-29     | 0.00147                      | 7386                                                   | 1704                                              | 568                                          |
|               | 30-34     | 0.00137                      | 5704                                                   | 4563                                              | 0                                            |
|               | 35-39     | 0.00166                      | 3060                                                   | 3060                                              | 612                                          |
|               | 40-44     | 0.00231                      | 4664                                                   | 4081                                              | 1749                                         |
|               | 45-49     | 0.00247                      | 602                                                    | 1805                                              | 2407                                         |
|               | 50-54     | 0.00445                      | 1805                                                   | 602                                               | 602                                          |
| Department 25 | 0-4       | 0.00328                      | 23073                                                  | 6153                                              | 1538                                         |
|               | 5-9       | 0.00020                      | 22020                                                  | 3146                                              | 0                                            |
|               | 10-14     | 0.00031                      | 22236                                                  | 3421                                              | 0                                            |
|               | 15-19     | 0.00068                      | 13822                                                  | 0                                                 | 6911                                         |
|               | 20-24     | 0.00119                      | 11206                                                  | 3735                                              | 934                                          |
|               | 25-29     | 0.00124                      | 8638                                                   | 7774                                              | 3455                                         |
|               | 30-34     | 0.00131                      | 6484                                                   | 4863                                              | 1621                                         |
|               | 35-39     | 0.00136                      | 6887                                                   | 6887                                              | 2951                                         |
|               | 40-44     | 0.00157                      | 7664                                                   | 5748                                              | 2874                                         |
|               | 45-49     | 0.00250                      | 1952                                                   | 4880                                              | 1952                                         |
|               | 50-54     | 0.00391                      | 989                                                    | 2967                                              | 1978                                         |
| Department 50 | 0-4       | 0.00387                      | 12999                                                  | 2122                                              | 1061                                         |
|               | 5-9       | 0.00043                      | 8825                                                   | 0                                                 | 490                                          |
|               | 10-14     | 0.00045                      | 7534                                                   | 502                                               | 0                                            |
|               | 15-19     | 0.00087                      | 8378                                                   | 1323                                              | 0                                            |
|               | 20-24     | 0.00204                      | 6971                                                   | 2033                                              | 290                                          |
|               | 25-29     | 0.00231                      | 6117                                                   | 2781                                              | 1390                                         |
|               | 30-34     | 0.00221                      | 4172                                                   | 4172                                              | 321                                          |
|               | 35-39     | 0.00245                      | 3536                                                   | 1632                                              | 544                                          |
|               | 40-44     | 0.00312                      | 3906                                                   | 1202                                              | 601                                          |
|               | 45-49     | 0.00332                      | 1776                                                   | 2030                                              | 254                                          |
|               | 50-54     | 0.00537                      | 1467                                                   | 838                                               | 629                                          |
| Department 54 | 0-4       | 0.00288                      | 21655                                                  | 6996                                              | 333                                          |
|               | 5-9       | 0.00027                      | 26925                                                  | 690                                               | 1381                                         |
|               | 10-14     | 0.00025                      | 19034                                                  | 1523                                              | 0                                            |
|               | 15-19     | 0.00112                      | 21637                                                  | 1110                                              | 555                                          |
|               | 20-24     | 0.00208                      | 11344                                                  | 4338                                              | 334                                          |
|               | 25-29     | 0.00221                      | 13006                                                  | 3344                                              | 372                                          |
|               | 30-34     | 0.00286                      | 8321                                                   | 4703                                              | 362                                          |
|               | 35-39     | 0.00251                      | 6431                                                   | 5466                                              | 965                                          |

| Departments   | Age group | Mortality rates (R) (%/year) | Not- overweight population in 2005 (Number of people) <sup>1</sup> | Overweight population in 2005 (Number of people) <sup>2</sup> | Obese population in 2005 (Number of people) <sup>3</sup> |
|---------------|-----------|------------------------------|--------------------------------------------------------------------|---------------------------------------------------------------|----------------------------------------------------------|
|               | 40-44     | 0.00310                      | 5986                                                               | 5986                                                          | 2993                                                     |
|               | 45-49     | 0.00390                      | 3090                                                               | 2163                                                          | 1854                                                     |
|               | 50-54     | 0.00619                      | 2875                                                               | 2236                                                          | 1278                                                     |
|               | 55-59     | 0.00799                      | 3807                                                               | 2635                                                          | 1757                                                     |
| Department 68 | 0-4       | 0.00252                      | 15891                                                              | 1703                                                          | 568                                                      |
|               | 5-9       | 0.00024                      | 17022                                                              | 5237                                                          | 1309                                                     |
|               | 10-14     | 0.00022                      | 16049                                                              | 4280                                                          | 1070                                                     |
|               | 15-19     | 0.00079                      | 24555                                                              | 909                                                           | 0                                                        |
|               | 20-24     | 0.00119                      | 11691                                                              | 3897                                                          | 0                                                        |
|               | 25-29     | 0.00143                      | 9228                                                               | 710                                                           | 710                                                      |
|               | 30-34     | 0.00151                      | 5506                                                               | 5506                                                          | 612                                                      |
|               | 35-39     | 0.00166                      | 7532                                                               | 2511                                                          | 1255                                                     |
|               | 40-44     | 0.00186                      | 7174                                                               | 2207                                                          | 2207                                                     |
|               | 45-49     | 0.00273                      | 2934                                                               | 2347                                                          | 0                                                        |
|               | 50-54     | 0.00506                      | 4471                                                               | 2795                                                          | 2236                                                     |
|               | 55-59     | 0.00666                      | 2959                                                               | 1479                                                          | 740                                                      |

<sup>†</sup>Values used in this table are for the urban population

<sup>1</sup> Initial value used in the stock of not-overweight population in 2005 for lower SES.

<sup>2</sup> Initial value used in the stock of overweight population in 2005 for lower SES.

<sup>3</sup> Initial value used in the stock of obese population in 2005 for lower SES.

**Table 55. Mortality rates and population size by age group at the department level for the middle socioeconomic status population (Oriental region) <sup>†</sup>**

| Departments   | Age group | Mortality rates (R) (%/year) | Not- overweight population in 2005 (Number of people) <sup>1</sup> | Overweight population in 2005 (Number of people) <sup>2</sup> | Obese population in 2005 (Number of people) <sup>3</sup> |
|---------------|-----------|------------------------------|--------------------------------------------------------------------|---------------------------------------------------------------|----------------------------------------------------------|
| Department 15 | 0-4       | 0.00348                      | 13946                                                              | 2615                                                          | 1743                                                     |
|               | 5-9       | 0.00037                      | 17108                                                              | 3422                                                          | 0                                                        |
|               | 10-14     | 0.00029                      | 15046                                                              | 2655                                                          | 885                                                      |
|               | 15-19     | 0.00083                      | 16161                                                              | 0                                                             | 808                                                      |
|               | 20-24     | 0.00120                      | 8810                                                               | 3146                                                          | 629                                                      |
|               | 25-29     | 0.00147                      | 10794                                                              | 3977                                                          | 568                                                      |
|               | 30-34     | 0.00137                      | 5704                                                               | 6274                                                          | 1711                                                     |
|               | 35-39     | 0.00166                      | 6121                                                               | 5509                                                          | 1224                                                     |
|               | 40-44     | 0.00231                      | 3498                                                               | 4081                                                          | 1749                                                     |
|               | 45-49     | 0.00247                      | 4814                                                               | 2407                                                          | 4212                                                     |
|               | 50-54     | 0.00445                      | 1805                                                               | 2407                                                          | 0                                                        |
| Department 25 | 55-59     | 0.00649                      | 2722                                                               | 3629                                                          | 907                                                      |
|               | 0-4       | 0.00328                      | 32302                                                              | 9998                                                          | 2307                                                     |
|               | 5-9       | 0.00020                      | 23593                                                              | 4719                                                          | 1573                                                     |
|               | 10-14     | 0.00031                      | 35919                                                              | 6842                                                          | 3421                                                     |
|               | 15-19     | 0.00068                      | 38011                                                              | 1728                                                          | 0                                                        |
|               | 20-24     | 0.00119                      | 34550                                                              | 12139                                                         | 1868                                                     |
|               | 25-29     | 0.00124                      | 19867                                                              | 12093                                                         | 1728                                                     |

| Departments   | Age group | Mortality rates (R) (%/year) | Not- overweight population in 2005 (Number of people)1 | Overweight population in 2005 (Number of people)2 | Obese population in 2005 (Number of people)3 |
|---------------|-----------|------------------------------|--------------------------------------------------------|---------------------------------------------------|----------------------------------------------|
|               | 30-34     | 0.00131                      | 14589                                                  | 9726                                              | 5674                                         |
|               | 35-39     | 0.00136                      | 10822                                                  | 9838                                              | 5903                                         |
|               | 40-44     | 0.00157                      | 10538                                                  | 9580                                              | 5748                                         |
|               | 45-49     | 0.00250                      | 5856                                                   | 15616                                             | 3904                                         |
|               | 50-54     | 0.00391                      | 11866                                                  | 8900                                              | 3955                                         |
|               | 55-59     | 0.00605                      | 4675                                                   | 6233                                              | 3116                                         |
| Department 50 | 0-4       | 0.00387                      | 15918                                                  | 3184                                              | 1326                                         |
|               | 5-9       | 0.00043                      | 13728                                                  | 2451                                              | 1961                                         |
|               | 10-14     | 0.00045                      | 16073                                                  | 2009                                              | 1005                                         |
|               | 15-19     | 0.00087                      | 14992                                                  | 1764                                              | 0                                            |
|               | 20-24     | 0.00204                      | 8714                                                   | 3486                                              | 1743                                         |
|               | 25-29     | 0.00231                      | 8620                                                   | 4727                                              | 1668                                         |
|               | 30-34     | 0.00221                      | 3851                                                   | 4172                                              | 1284                                         |
|               | 35-39     | 0.00245                      | 5440                                                   | 4896                                              | 2448                                         |
|               | 40-44     | 0.00312                      | 3906                                                   | 3605                                              | 3305                                         |
|               | 45-49     | 0.00332                      | 3298                                                   | 4059                                              | 2537                                         |
|               | 50-54     | 0.00537                      | 1258                                                   | 2725                                              | 2305                                         |
| 55-59         | 0.00707   | 1655                         | 2837                                                   | 709                                               |                                              |
| Department 54 | 0-4       | 0.00288                      | 28984                                                  | 6663                                              | 999                                          |
|               | 5-9       | 0.00027                      | 35210                                                  | 1381                                              | 690                                          |
|               | 10-14     | 0.00025                      | 38067                                                  | 4568                                              | 0                                            |
|               | 15-19     | 0.00112                      | 29404                                                  | 4438                                              | 1110                                         |
|               | 20-24     | 0.00208                      | 22689                                                  | 7341                                              | 1001                                         |
|               | 25-29     | 0.00221                      | 14864                                                  | 7432                                              | 2230                                         |
|               | 30-34     | 0.00286                      | 13747                                                  | 6874                                              | 3979                                         |
|               | 35-39     | 0.00251                      | 10611                                                  | 10611                                             | 3215                                         |
|               | 40-44     | 0.00310                      | 8230                                                   | 9352                                              | 2993                                         |
|               | 45-49     | 0.00390                      | 6180                                                   | 7107                                              | 3708                                         |
|               | 50-54     | 0.00619                      | 5111                                                   | 3194                                              | 3833                                         |
| 55-59         | 0.00799   | 4392                         | 3514                                                   | 1757                                              |                                              |
| Department 68 | 0-4       | 0.00252                      | 34053                                                  | 7946                                              | 2270                                         |
|               | 5-9       | 0.00024                      | 30115                                                  | 3928                                              | 1309                                         |
|               | 10-14     | 0.00022                      | 27818                                                  | 5350                                              | 2140                                         |
|               | 15-19     | 0.00079                      | 26374                                                  | 5457                                              | 2728                                         |
|               | 20-24     | 0.00119                      | 24681                                                  | 5845                                              | 1948                                         |
|               | 25-29     | 0.00143                      | 19875                                                  | 12067                                             | 2130                                         |
|               | 30-34     | 0.00151                      | 11012                                                  | 14071                                             | 6730                                         |
|               | 35-39     | 0.00166                      | 13809                                                  | 11926                                             | 5021                                         |
|               | 40-44     | 0.00186                      | 8829                                                   | 8277                                              | 4414                                         |
|               | 45-49     | 0.00273                      | 4694                                                   | 10561                                             | 4694                                         |
|               | 50-54     | 0.00506                      | 6707                                                   | 6148                                              | 2795                                         |
| 55-59         | 0.00666   | 1479                         | 4438                                                   | 3698                                              |                                              |

† Values used in this table are for the urban population

1 Initial value used in the stock of not-overweight population in 2005 for middle SES.

2 Initial value used in the stock of overweight population in 2005 for middle SES.

3 Initial value used in the stock of obese population in 2005 for middle SES.

**Table 56. Mortality rates and population size by age group at the department level for the higher socioeconomic status population (Oriental region) †**

| Departments   | Age group | Mortality rates (R) (%/year) | Not- overweight population in 2005 (Number of people) <sup>1</sup> | Overweight population in 2005 (Number of people) <sup>2</sup> | Obese population in 2005 (Number of people) <sup>3</sup> |
|---------------|-----------|------------------------------|--------------------------------------------------------------------|---------------------------------------------------------------|----------------------------------------------------------|
| Department 15 | 0-4       | 0.00348                      | 17433                                                              | 3051                                                          | 1307                                                     |
|               | 5-9       | 0.00037                      | 22240                                                              | 5988                                                          | 0                                                        |
|               | 10-14     | 0.00029                      | 30977                                                              | 4425                                                          | 1770                                                     |
|               | 15-19     | 0.00083                      | 27474                                                              | 4848                                                          | 0                                                        |
|               | 20-24     | 0.00120                      | 25800                                                              | 3146                                                          | 629                                                      |
|               | 25-29     | 0.00147                      | 15339                                                              | 5681                                                          | 1704                                                     |
|               | 30-34     | 0.00137                      | 9696                                                               | 7985                                                          | 2852                                                     |
|               | 35-39     | 0.00166                      | 12241                                                              | 9793                                                          | 3672                                                     |
|               | 40-44     | 0.00231                      | 8162                                                               | 9328                                                          | 4664                                                     |
|               | 45-49     | 0.00247                      | 4212                                                               | 10831                                                         | 4814                                                     |
|               | 50-54     | 0.00445                      | 2407                                                               | 12634                                                         | 7821                                                     |
|               | 55-59     | 0.00649                      | 1815                                                               | 4990                                                          | 4536                                                     |
| Department 25 | 0-4       | 0.00328                      | 43839                                                              | 11537                                                         | 4615                                                     |
|               | 5-9       | 0.00020                      | 61341                                                              | 14156                                                         | 11010                                                    |
|               | 10-14     | 0.00031                      | 54734                                                              | 17104                                                         | 5131                                                     |
|               | 15-19     | 0.00068                      | 70839                                                              | 15550                                                         | 1728                                                     |
|               | 20-24     | 0.00119                      | 37352                                                              | 17742                                                         | 2801                                                     |
|               | 25-29     | 0.00124                      | 29368                                                              | 19867                                                         | 6046                                                     |
|               | 30-34     | 0.00131                      | 32420                                                              | 16210                                                         | 8105                                                     |
|               | 35-39     | 0.00136                      | 28530                                                              | 20660                                                         | 14757                                                    |
|               | 40-44     | 0.00157                      | 20118                                                              | 19160                                                         | 22034                                                    |
|               | 45-49     | 0.00250                      | 13664                                                              | 22449                                                         | 13664                                                    |
|               | 50-54     | 0.00391                      | 2967                                                               | 19777                                                         | 12855                                                    |
|               | 55-59     | 0.00605                      | 9349                                                               | 14803                                                         | 7791                                                     |
| Department 50 | 0-4       | 0.00387                      | 14591                                                              | 5571                                                          | 1592                                                     |
|               | 5-9       | 0.00043                      | 23534                                                              | 5883                                                          | 981                                                      |
|               | 10-14     | 0.00045                      | 27123                                                              | 4521                                                          | 1507                                                     |
|               | 15-19     | 0.00087                      | 29102                                                              | 2205                                                          | 882                                                      |
|               | 20-24     | 0.00204                      | 21495                                                              | 5809                                                          | 1452                                                     |
|               | 25-29     | 0.00231                      | 13625                                                              | 7229                                                          | 1390                                                     |
|               | 30-34     | 0.00221                      | 12195                                                              | 9306                                                          | 2567                                                     |
|               | 35-39     | 0.00245                      | 10608                                                              | 9248                                                          | 3264                                                     |
|               | 40-44     | 0.00312                      | 6309                                                               | 8112                                                          | 6910                                                     |
|               | 45-49     | 0.00332                      | 3806                                                               | 7865                                                          | 4820                                                     |
|               | 50-54     | 0.00537                      | 4611                                                               | 5240                                                          | 4192                                                     |
|               | 55-59     | 0.00707                      | 946                                                                | 4728                                                          | 3783                                                     |
| Department 54 | 0-4       | 0.00288                      | 20655                                                              | 8995                                                          | 2665                                                     |
|               | 5-9       | 0.00027                      | 27615                                                              | 4833                                                          | 5523                                                     |
|               | 10-14     | 0.00025                      | 29693                                                              | 3045                                                          | 3045                                                     |

| Departments   | Age group | Mortality rates (R) (%/year) | Not- overweight population in 2005 (Number of people) <sup>1</sup> | Overweight population in 2005 (Number of people) <sup>2</sup> | Obese population in 2005 (Number of people) <sup>3</sup> |
|---------------|-----------|------------------------------|--------------------------------------------------------------------|---------------------------------------------------------------|----------------------------------------------------------|
|               | 15-19     | 0.00112                      | 28849                                                              | 4993                                                          | 1110                                                     |
|               | 20-24     | 0.00208                      | 27360                                                              | 8675                                                          | 2669                                                     |
|               | 25-29     | 0.00221                      | 18951                                                              | 10405                                                         | 4088                                                     |
|               | 30-34     | 0.00286                      | 12300                                                              | 11215                                                         | 4341                                                     |
|               | 35-39     | 0.00251                      | 11576                                                              | 11897                                                         | 4180                                                     |
|               | 40-44     | 0.00310                      | 11597                                                              | 8978                                                          | 4115                                                     |
|               | 45-49     | 0.00390                      | 5562                                                               | 14522                                                         | 5871                                                     |
|               | 50-54     | 0.00619                      | 6069                                                               | 9902                                                          | 5430                                                     |
|               | 55-59     | 0.00799                      | 4392                                                               | 4099                                                          | 4685                                                     |
| Department 68 | 0-4       | 0.00252                      | 43702                                                              | 12486                                                         | 3405                                                     |
|               | 5-9       | 0.00024                      | 57611                                                              | 14403                                                         | 3928                                                     |
|               | 10-14     | 0.00022                      | 62055                                                              | 17119                                                         | 6420                                                     |
|               | 15-19     | 0.00079                      | 69118                                                              | 6366                                                          | 1819                                                     |
|               | 20-24     | 0.00119                      | 61702                                                              | 15588                                                         | 2598                                                     |
|               | 25-29     | 0.00143                      | 41880                                                              | 23425                                                         | 5679                                                     |
|               | 30-34     | 0.00151                      | 30589                                                              | 20189                                                         | 9789                                                     |
|               | 35-39     | 0.00166                      | 28873                                                              | 21969                                                         | 12554                                                    |
|               | 40-44     | 0.00186                      | 21521                                                              | 34764                                                         | 9933                                                     |
|               | 45-49     | 0.00273                      | 18189                                                              | 24057                                                         | 13495                                                    |
|               | 50-54     | 0.00506                      | 11178                                                              | 21238                                                         | 6707                                                     |
|               | 55-59     | 0.00666                      | 8876                                                               | 19231                                                         | 8876                                                     |

<sup>1</sup>Values used in this table are for the urban population

<sup>2</sup> Initial value used in the stock of not-overweight population in 2005 for higher SES.

<sup>3</sup> Initial value used in the stock of overweight population in 2005 for higher SES.

<sup>3</sup> Initial value used in the stock of obese population in 2005 for higher SES.

## 1.3 Central region

The Central region of Colombia is located in the central area of the national territory and consists of seven departments, these are:

- Antioquia (5)
- Caldas (17)
- Caquetá (18)
- Huila (41)
- Quindío (63)
- Risaralda (66)
- Tolima (73)

### 1.3.1 Data and model parameters used

**Table 57. Prevalent rates of entire population by age group, sex, and body mass index category in 2005 (Central region)**

| Age Group | Nutritional State | Nutritional State |
|-----------|-------------------|-------------------|
|-----------|-------------------|-------------------|

|       | Male          |           |         | Female        |           |         |
|-------|---------------|-----------|---------|---------------|-----------|---------|
|       | Not-Overweigh | Overweigh | Obese   | Not-Overweigh | Overweigh | Obese   |
| 0-4   | 0.76770       | 0.16770   | 0.06460 | 0.78267       | 0.16933   | 0.04800 |
| 5-9   | 0.81472       | 0.13198   | 0.05330 | 0.82339       | 0.14081   | 0.03580 |
| 10-14 | 0.82791       | 0.13488   | 0.03721 | 0.82725       | 0.12652   | 0.04623 |
| 15-19 | 0.90638       | 0.07447   | 0.01915 | 0.83814       | 0.13301   | 0.02885 |
| 20-24 | 0.80000       | 0.14959   | 0.05041 | 0.77162       | 0.17295   | 0.05543 |
| 25-29 | 0.67008       | 0.26844   | 0.06148 | 0.66667       | 0.24151   | 0.09182 |
| 30-34 | 0.51111       | 0.38519   | 0.10370 | 0.55686       | 0.31895   | 0.12418 |
| 35-39 | 0.48931       | 0.39430   | 0.11639 | 0.47821       | 0.35714   | 0.16465 |
| 40-44 | 0.46599       | 0.42569   | 0.10831 | 0.44226       | 0.36745   | 0.19029 |
| 45-49 | 0.46226       | 0.42689   | 0.11085 | 0.33725       | 0.40000   | 0.26275 |
| 50-54 | 0.44126       | 0.44986   | 0.10888 | 0.28033       | 0.41967   | 0.30000 |
| 55-59 | 0.41603       | 0.41221   | 0.17176 | 0.29211       | 0.42431   | 0.28358 |

**Table 58. Prevalent rates of lower socioeconomic status population by age group, sex, and body mass index category in 2005 (Central region)**

| Age Group | Nutritional State Male |           |         | Nutritional State Female |           |         |
|-----------|------------------------|-----------|---------|--------------------------|-----------|---------|
|           | Not-Overweigh          | Overweigh | Obese   | Not-Overweigh            | Overweigh | Obese   |
| 0-4       | 0.78008                | 0.17012   | 0.04979 | 0.84038                  | 0.13615   | 0.02347 |
| 5-9       | 0.84211                | 0.13158   | 0.02632 | 0.85882                  | 0.12941   | 0.01176 |
| 10-14     | 0.87640                | 0.11236   | 0.01124 | 0.87000                  | 0.10000   | 0.03000 |
| 15-19     | 0.94681                | 0.05319   | 0.00000 | 0.81395                  | 0.17829   | 0.00775 |
| 20-24     | 0.87736                | 0.06604   | 0.05660 | 0.77326                  | 0.16279   | 0.06395 |
| 25-29     | 0.75510                | 0.22449   | 0.02041 | 0.64706                  | 0.22794   | 0.12500 |
| 30-34     | 0.63636                | 0.27273   | 0.09091 | 0.51724                  | 0.39310   | 0.08966 |
| 35-39     | 0.71212                | 0.21212   | 0.07576 | 0.38235                  | 0.41176   | 0.20588 |
| 40-44     | 0.66667                | 0.26667   | 0.06667 | 0.36538                  | 0.33654   | 0.29808 |
| 45-49     | 0.56757                | 0.39189   | 0.04054 | 0.41489                  | 0.43617   | 0.14894 |
| 50-54     | 0.58209                | 0.40299   | 0.01493 | 0.41053                  | 0.34737   | 0.24211 |
| 55-59     | 0.58182                | 0.30909   | 0.10909 | 0.43548                  | 0.29032   | 0.27419 |

**Table 59. Prevalent rates of middle socioeconomic status population by age group, sex, and body mass index category in 2005 (Central region)**

| Age Group | Nutritional State Male |           |         | Nutritional State Female |           |         |
|-----------|------------------------|-----------|---------|--------------------------|-----------|---------|
|           | Not-Overweigh          | Overweigh | Obese   | Not-Overweigh            | Overweigh | Obese   |
| 0-4       | 0.77273                | 0.15909   | 0.06818 | 0.75104                  | 0.18257   | 0.06639 |
| 5-9       | 0.82963                | 0.11852   | 0.05185 | 0.84071                  | 0.10619   | 0.05310 |
| 10-14     | 0.84932                | 0.11644   | 0.03425 | 0.84000                  | 0.12800   | 0.03200 |
| 15-19     | 0.88636                | 0.09091   | 0.02273 | 0.87135                  | 0.09942   | 0.02924 |
| 20-24     | 0.86628                | 0.08140   | 0.05233 | 0.75290                  | 0.18147   | 0.06564 |
| 25-29     | 0.72180                | 0.21053   | 0.06767 | 0.62931                  | 0.26293   | 0.10776 |
| 30-34     | 0.57480                | 0.34646   | 0.07874 | 0.46117                  | 0.36893   | 0.16990 |
| 35-39     | 0.49600                | 0.40800   | 0.09600 | 0.46875                  | 0.34375   | 0.18750 |
| 40-44     | 0.51754                | 0.40351   | 0.07895 | 0.38378                  | 0.41081   | 0.20541 |
| 45-49     | 0.53571                | 0.33929   | 0.12500 | 0.28037                  | 0.46729   | 0.25234 |
| 50-54     | 0.52564                | 0.39744   | 0.07692 | 0.24823                  | 0.38298   | 0.36879 |
| 55-59     | 0.47273                | 0.40000   | 0.12727 | 0.29293                  | 0.42424   | 0.28283 |



**Table 60. Prevalent rates of higher socioeconomic status population by age group, sex, and body mass index category in 2005 (Central region)**

| Age Group | Nutritional State Male |             |             | Nutritional State Female |            |            |
|-----------|------------------------|-------------|-------------|--------------------------|------------|------------|
|           | Not-Overweigh          | Overweigh   | Obese       | Not-Overweigh            | Overweigh  | Obese      |
| 0-4       | 0,753333333            | 0,173333333 | 0,073333333 | 0,76689189               | 0,18243243 | 0,05067568 |
| 5-9       | 0,792349727            | 0,142076503 | 0,065573770 | 0,80090498               | 0,16289593 | 0,0361991  |
| 10-14     | 0,789743590            | 0,158974359 | 0,051282051 | 0,79569892               | 0,13978495 | 0,06451613 |
| 15-19     | 0,901639344            | 0,073770492 | 0,024590164 | 0,83024691               | 0,13271605 | 0,03703704 |
| 20-24     | 0,741839763            | 0,210682493 | 0,047477745 | 0,78131635               | 0,17197452 | 0,04670913 |
| 25-29     | 0,610894942            | 0,315175097 | 0,073929961 | 0,69320843               | 0,23419204 | 0,07259953 |
| 30-34     | 0,433962264            | 0,443396226 | 0,122641509 | 0,61835749               | 0,26811594 | 0,11352657 |
| 35-39     | 0,421739130            | 0,439130435 | 0,139130435 | 0,51072961               | 0,34763948 | 0,1416309  |
| 40-44     | 0,385650224            | 0,479820628 | 0,134529148 | 0,4820296                | 0,35729387 | 0,16067653 |
| 45-49     | 0,394957983            | 0,478991597 | 0,126050420 | 0,34792123               | 0,36105033 | 0,29102845 |
| 50-54     | 0,362745098            | 0,485294118 | 0,151960784 | 0,25935829               | 0,45187166 | 0,28877005 |
| 55-59     | 0,335526316            | 0,453947368 | 0,210526316 | 0,26298701               | 0,4512987  | 0,28571429 |

**Table 61. Prevalent rates of entire population by age group, sex, and body mass index category in 2010 (Central region)**

| Age Group | Nutritional State Male |           |         | Nutritional State Female |           |         |
|-----------|------------------------|-----------|---------|--------------------------|-----------|---------|
|           | Not-Overweigh          | Overweigh | Obese   | Not-Overweigh            | Overweigh | Obese   |
| 0-4       | 0.75646                | 0.20204   | 0.04150 | 0.74368                  | 0.20573   | 0.05059 |
| 5-9       | 0.74457                | 0.15421   | 0.10122 | 0.78224                  | 0.15574   | 0.06202 |
| 10-14     | 0.77203                | 0.15971   | 0.06826 | 0.80088                  | 0.16206   | 0.03706 |
| 15-19     | 0.86534                | 0.10670   | 0.02796 | 0.80834                  | 0.14375   | 0.04792 |
| 20-24     | 0.75588                | 0.19216   | 0.05196 | 0.70886                  | 0.21296   | 0.07818 |
| 25-29     | 0.56257                | 0.33333   | 0.10410 | 0.57454                  | 0.29481   | 0.13065 |
| 30-34     | 0.44140                | 0.40274   | 0.15586 | 0.48689                  | 0.34003   | 0.17308 |
| 35-39     | 0.41395                | 0.43323   | 0.15282 | 0.40151                  | 0.39114   | 0.20735 |
| 40-44     | 0.41495                | 0.43428   | 0.15077 | 0.35678                  | 0.39365   | 0.24957 |
| 45-49     | 0.37926                | 0.44611   | 0.17462 | 0.32857                  | 0.42411   | 0.24732 |
| 50-54     | 0.36364                | 0.48963   | 0.14673 | 0.26022                  | 0.40799   | 0.33178 |
| 55-59     | 0.42214                | 0.43902   | 0.13884 | 0.26460                  | 0.38261   | 0.35280 |

**Table 62. Prevalent rates of lower socioeconomic status population by age group, sex, and body mass index category in 2010 (Central region)**

| Age Group | Nutritional State Male |           |         | Nutritional State Female |           |         |
|-----------|------------------------|-----------|---------|--------------------------|-----------|---------|
|           | Not-Overweigh          | Overweigh | Obese   | Not-Overweigh            | Overweigh | Obese   |
| 0-4       | 0.77744                | 0.18598   | 0.03659 | 0.74390                  | 0.20122   | 0.05488 |
| 5-9       | 0.82245                | 0.12010   | 0.05744 | 0.87216                  | 0.10227   | 0.02557 |
| 10-14     | 0.86006                | 0.10787   | 0.03207 | 0.86216                  | 0.10270   | 0.03514 |
| 15-19     | 0.87956                | 0.10219   | 0.01825 | 0.79630                  | 0.15432   | 0.04938 |
| 20-24     | 0.80000                | 0.13846   | 0.06154 | 0.72951                  | 0.18443   | 0.08607 |
| 25-29     | 0.65625                | 0.24375   | 0.10000 | 0.60699                  | 0.25764   | 0.13537 |
| 30-34     | 0.60843                | 0.28313   | 0.10843 | 0.40094                  | 0.36792   | 0.23113 |

|       |         |         |         |         |         |         |
|-------|---------|---------|---------|---------|---------|---------|
| 35-39 | 0.52174 | 0.36522 | 0.11304 | 0.37436 | 0.37436 | 0.25128 |
| 40-44 | 0.59016 | 0.33607 | 0.07377 | 0.29825 | 0.39766 | 0.30409 |
| 45-49 | 0.47826 | 0.38261 | 0.13913 | 0.36000 | 0.36000 | 0.28000 |
| 50-54 | 0.48598 | 0.41121 | 0.10280 | 0.25342 | 0.39726 | 0.34932 |
| 55-59 | 0.60000 | 0.35789 | 0.04211 | 0.74390 | 0.20122 | 0.05488 |

**Table 63. Prevalent rates of middle socioeconomic status population by age group, sex, and body mass index category in 2010 (Central region)**

| Age Group | Nutritional State Male |           |         | Nutritional State Female |           |         |
|-----------|------------------------|-----------|---------|--------------------------|-----------|---------|
|           | Not-Overweigh          | Overweigh | Obese   | Not-Overweigh            | Overweigh | Obese   |
| 0-4       | 0.75159                | 0.21444   | 0.03397 | 0.74641                  | 0.22249   | 0.03110 |
| 5-9       | 0.73814                | 0.16495   | 0.09691 | 0.79183                  | 0.14008   | 0.06809 |
| 10-14     | 0.78053                | 0.15076   | 0.06870 | 0.79779                  | 0.16544   | 0.03676 |
| 15-19     | 0.86019                | 0.10427   | 0.03555 | 0.82286                  | 0.13905   | 0.03810 |
| 20-24     | 0.78917                | 0.17379   | 0.03704 | 0.69167                  | 0.20833   | 0.10000 |
| 25-29     | 0.56610                | 0.34237   | 0.09153 | 0.55206                  | 0.27603   | 0.17191 |
| 30-34     | 0.42254                | 0.41549   | 0.16197 | 0.45902                  | 0.35792   | 0.18306 |
| 35-39     | 0.47210                | 0.42489   | 0.10300 | 0.36857                  | 0.40000   | 0.23143 |
| 40-44     | 0.37021                | 0.46383   | 0.16596 | 0.35150                  | 0.34877   | 0.29973 |
| 45-49     | 0.42678                | 0.43933   | 0.13389 | 0.30699                  | 0.41337   | 0.27964 |
| 50-54     | 0.39785                | 0.47312   | 0.12903 | 0.24847                  | 0.42025   | 0.33129 |
| 55-59     | 0.40506                | 0.42405   | 0.17089 | 0.27103                  | 0.35981   | 0.36916 |

**Table 64. Prevalent rates of higher socioeconomic status population by age group, sex, and body mass index category in 2010 (Central region)**

| Age Group | Nutritional State Male |           |         | Nutritional State Female |           |         |
|-----------|------------------------|-----------|---------|--------------------------|-----------|---------|
|           | Not-Overweigh          | Overweigh | Obese   | Not-Overweigh            | Overweigh | Obese   |
| 0-4       | 0.74686                | 0.20084   | 0.05230 | 0.74091                  | 0.19318   | 0.06591 |
| 5-9       | 0.70033                | 0.16722   | 0.13245 | 0.71609                  | 0.20434   | 0.07957 |
| 10-14     | 0.71807                | 0.19470   | 0.08723 | 0.76991                  | 0.19174   | 0.03835 |
| 15-19     | 0.86275                | 0.11011   | 0.02715 | 0.80343                  | 0.14248   | 0.05409 |
| 20-24     | 0.71308                | 0.22785   | 0.05907 | 0.71405                  | 0.22779   | 0.05816 |
| 25-29     | 0.52679                | 0.35938   | 0.11384 | 0.57790                  | 0.32428   | 0.09783 |
| 30-34     | 0.37784                | 0.44886   | 0.17330 | 0.53710                  | 0.31802   | 0.14488 |
| 35-39     | 0.33436                | 0.46319   | 0.20245 | 0.43411                  | 0.39147   | 0.17442 |
| 40-44     | 0.38902                | 0.44630   | 0.16468 | 0.37580                  | 0.41879   | 0.20541 |
| 45-49     | 0.31926                | 0.46966   | 0.21108 | 0.33229                  | 0.44462   | 0.22309 |
| 50-54     | 0.30539                | 0.52395   | 0.17066 | 0.26821                  | 0.40397   | 0.32781 |
| 55-59     | 0.37143                | 0.47500   | 0.15357 | 0.26122                  | 0.40000   | 0.33878 |

**Table 65 Fraction of births for men by body mass index category, sex, and socioeconomic status (Central region)†**

| Population group | Lower SES (%/year) | Middle SES (%/year) | Higher SES (%/year) | Complete Urban Population (%/year) |
|------------------|--------------------|---------------------|---------------------|------------------------------------|
| Not- overweight  | 85,48%             | 78,00%              | 85,51%              | 83,43%                             |
| Overweight       | 11,29%             | 12,00%              | 11,59%              | 11,60%                             |
| Obese            | 3,23%              | 10,00%              | 2,90%               | 4,97%                              |

† The fractions of births by each BMI category correspond to the prevalences by BMI category of children aged 0 to 12 months

**Table 66. Fraction of births for women by body mass index category and socioeconomic status (Central region) †**

| Population group | Lower SES (%/year) | Middle SES (%/year) | Higher SES (%/year) | Complete Urban Population (%/year) |
|------------------|--------------------|---------------------|---------------------|------------------------------------|
| Not- overweight  | 79,41%             | 82,22%              | 76,79%              | 79,26%                             |
| Overweight       | 17,65%             | 15,56%              | 19,64%              | 17,78%                             |
| Obese            | 2,94%              | 2,22%               | 3,57%               | 2,96%                              |

† The fractions of births by each BMI category correspond to the prevalences by BMI category of children aged 0 to 12 months

**Table 67. Mortality rates for men and population size by age group without segregate by socioeconomic status (Central region) †**

| Age group | Mortality rates (R) (%/year) | Not- overweight men in 2005 (Number of people) <sup>1</sup> | Overweight men in 2005 (Number of people) <sup>2</sup> | Obese men in 2005 (Number of people) <sup>3</sup> |
|-----------|------------------------------|-------------------------------------------------------------|--------------------------------------------------------|---------------------------------------------------|
| 0-4       | 0.00324                      | 273833                                                      | 59818                                                  | 23041                                             |
| 5-9       | 0.00036                      | 306621                                                      | 49671                                                  | 20059                                             |
| 10-14     | 0.00034                      | 328460                                                      | 53513                                                  | 14762                                             |
| 15-19     | 0.00167                      | 340495                                                      | 27975                                                  | 7194                                              |
| 20-24     | 0.00341                      | 257326                                                      | 48118                                                  | 16214                                             |
| 25-29     | 0.00337                      | 193447                                                      | 77497                                                  | 17747                                             |
| 30-34     | 0.00323                      | 130546                                                      | 98382                                                  | 26488                                             |
| 35-39     | 0.00309                      | 131476                                                      | 105947                                                 | 31273                                             |
| 40-44     | 0.00336                      | 122631                                                      | 112025                                                 | 28503                                             |
| 45-49     | 0.00443                      | 102487                                                      | 94643                                                  | 24576                                             |
| 50-54     | 0.00641                      | 79070                                                       | 80611                                                  | 19511                                             |
| 55-59     | 0.00895                      | 56890                                                       | 56368                                                  | 23487                                             |

† Values used in this table are for the urban population

<sup>1</sup> Initial value used in the stock of not-overweight population in 2005.

<sup>2</sup> Initial value used in the stock of overweight population in 2005.

<sup>3</sup> Initial value used in the stock of obese population in 2005.

**Table 68. Mortality rates for women and population size by age group without segregate by socioeconomic status (Central region) †**

| Age group | Mortality rates (R) (%/year) Female | Not- overweight women in 2005 (Number of people) <sup>1</sup> | Overweight women in 2005 (Number of people) <sup>2</sup> | Obese women in 2005 (Number of people) <sup>3</sup> |
|-----------|-------------------------------------|---------------------------------------------------------------|----------------------------------------------------------|-----------------------------------------------------|
| 0-4       | 0.00261                             | 268792                                                        | 58154                                                    | 16485                                               |
| 5-9       | 0.00024                             | 299977                                                        | 51300                                                    | 13042                                               |
| 10-14     | 0.00023                             | 319572                                                        | 48876                                                    | 17858                                               |
| 15-19     | 0.00047                             | 320020                                                        | 50787                                                    | 11014                                               |
| 20-24     | 0.00067                             | 267929                                                        | 60053                                                    | 19248                                               |
| 25-29     | 0.00058                             | 211777                                                        | 76719                                                    | 29169                                               |
| 30-34     | 0.00087                             | 161027                                                        | 92232                                                    | 35910                                               |

|       |         |        |        |       |
|-------|---------|--------|--------|-------|
| 35-39 | 0.00113 | 148473 | 110885 | 51120 |
| 40-44 | 0.00148 | 134466 | 111722 | 57856 |
| 45-49 | 0.00232 | 87754  | 104080 | 68366 |
| 50-54 | 0.00343 | 58805  | 88035  | 62932 |
| 55-59 | 0.00585 | 47432  | 68897  | 46047 |

†Values used in this table are for the urban population

<sup>1</sup> Initial value used in the stock of not-overweight population in 2005.

<sup>2</sup> Initial value used in the stock of overweight population in 2005.

<sup>3</sup> Initial value used in the stock of obese population in 2005.

**Table 69. Man mortality rates and population size by age group for the lower socioeconomic status population (Central region) †**

| Age group | Mortality rates (R) (%/year) | Not- overweight men in 2005 (Number of people) <sup>1</sup> | Overweight men in 2005 (Number of people) <sup>2</sup> | Obese men in 2005 (Number of people) <sup>3</sup> |
|-----------|------------------------------|-------------------------------------------------------------|--------------------------------------------------------|---------------------------------------------------|
| 0-4       | 0.00324                      | 83302                                                       | 18167                                                  | 5317                                              |
| 5-9       | 0.00036                      | 61133                                                       | 9552                                                   | 1910                                              |
| 10-14     | 0.00034                      | 71966                                                       | 9226                                                   | 923                                               |
| 15-19     | 0.00167                      | 71136                                                       | 3996                                                   | 0                                                 |
| 20-24     | 0.00341                      | 48641                                                       | 3661                                                   | 3138                                              |
| 25-29     | 0.00337                      | 43777                                                       | 13015                                                  | 1183                                              |
| 30-34     | 0.00323                      | 26488                                                       | 11352                                                  | 3784                                              |
| 35-39     | 0.00309                      | 29997                                                       | 8935                                                   | 3191                                              |
| 40-44     | 0.00336                      | 26515                                                       | 10606                                                  | 2651                                              |
| 45-49     | 0.00443                      | 21961                                                       | 15164                                                  | 1569                                              |
| 50-54     | 0.00641                      | 20024                                                       | 13863                                                  | 513                                               |
| 55-59     | 0.00895                      | 16702                                                       | 8873                                                   | 3132                                              |

†Values used in this table are for the urban population

<sup>1</sup> Initial value used in the stock of not-overweight population in 2005 for lower SES.

<sup>2</sup> Initial value used in the stock of overweight population in 2005 for lower SES.

<sup>3</sup> Initial value used in the stock of obese population in 2005 for lower SES.

**Table 70. Women mortality rates and population size by age group for the lower socioeconomic status population (Central region) †**

| Age group | Mortality rates (R) (%/year) | Not- overweight women in 2005 (Number of people) <sup>1</sup> | Overweight women in 2005 (Number of people) <sup>2</sup> | Obese women in 2005 (Number of people) <sup>3</sup> |
|-----------|------------------------------|---------------------------------------------------------------|----------------------------------------------------------|-----------------------------------------------------|
| 0-4       | 0.00261                      | 86404                                                         | 13998                                                    | 2414                                                |
| 5-9       | 0.00024                      | 60354                                                         | 9094                                                     | 827                                                 |
| 10-14     | 0.00023                      | 69562                                                         | 7996                                                     | 2399                                                |
| 15-19     | 0.00047                      | 62157                                                         | 13615                                                    | 592                                                 |
| 20-24     | 0.00067                      | 46278                                                         | 9743                                                     | 3827                                                |
| 25-29     | 0.00058                      | 41278                                                         | 14541                                                    | 7974                                                |
| 30-34     | 0.00087                      | 24374                                                         | 18525                                                    | 4225                                                |
| 35-39     | 0.00113                      | 18610                                                         | 20042                                                    | 10021                                               |
| 40-44     | 0.00148                      | 16790                                                         | 15464                                                    | 13697                                               |
| 45-49     | 0.00232                      | 18841                                                         | 19807                                                    | 6764                                                |
| 50-54     | 0.00343                      | 16532                                                         | 13989                                                    | 9750                                                |
| 55-59     | 0.00585                      | 14844                                                         | 9896                                                     | 9346                                                |

†Values used in this table are for the urban population

<sup>1</sup> Initial value used in the stock of not-overweight population in 2005 for lower SES.

<sup>2</sup> Initial value used in the stock of overweight population in 2005 for lower SES.

<sup>3</sup> Initial value used in the stock of obese population in 2005 for lower SES.

**Table 71. Man mortality rates and population size by age group for the middle socioeconomic status population (Central region) †**

| Age group | Mortality rates (R) (%/year) | Not- overweight men in 2005 (Number of people) <sup>1</sup> | Overweight men in 2005 (Number of people) <sup>2</sup> | Obese men in 2005 (Number of people) <sup>3</sup> |
|-----------|------------------------------|-------------------------------------------------------------|--------------------------------------------------------|---------------------------------------------------|
| 0-4       | 0.00324                      | 90392                                                       | 18610                                                  | 7976                                              |
| 5-9       | 0.00036                      | 106983                                                      | 15283                                                  | 6686                                              |
| 10-14     | 0.00034                      | 114407                                                      | 15685                                                  | 4613                                              |
| 15-19     | 0.00167                      | 93516                                                       | 9591                                                   | 2398                                              |
| 20-24     | 0.00341                      | 77930                                                       | 7322                                                   | 4707                                              |
| 25-29     | 0.00337                      | 56792                                                       | 16564                                                  | 5324                                              |
| 30-34     | 0.00323                      | 46038                                                       | 27749                                                  | 6307                                              |
| 35-39     | 0.00309                      | 39570                                                       | 32550                                                  | 7659                                              |
| 40-44     | 0.00336                      | 39109                                                       | 30492                                                  | 5966                                              |
| 45-49     | 0.00443                      | 31373                                                       | 19870                                                  | 7320                                              |
| 50-54     | 0.00641                      | 21051                                                       | 15917                                                  | 3081                                              |
| 55-59     | 0.00895                      | 13570                                                       | 11482                                                  | 3653                                              |

†Values used in this table are for the urban population

1 Initial value used in the stock of not-overweight population in 2005 for middle SES.

2 Initial value used in the stock of overweight population in 2005 for middle SES.

3 Initial value used in the stock of obese population in 2005 for middle SES.

**Table 72. Women mortality rates and population size by age group for the middle socioeconomic status population (Central region) †**

| Age group | Mortality rates (R) (%/year) | Not- overweight women in 2005 (Number of people) <sup>1</sup> | Overweight women in 2005 (Number of people) <sup>2</sup> | Obese women in 2005 (Number of people) <sup>3</sup> |
|-----------|------------------------------|---------------------------------------------------------------|----------------------------------------------------------|-----------------------------------------------------|
| 0-4       | 0.00261                      | 84588                                                         | 20563                                                    | 7477                                                |
| 5-9       | 0.00024                      | 104946                                                        | 13256                                                    | 6628                                                |
| 10-14     | 0.00023                      | 110178                                                        | 16789                                                    | 4197                                                |
| 15-19     | 0.00047                      | 93439                                                         | 10661                                                    | 3136                                                |
| 20-24     | 0.00067                      | 73115                                                         | 17623                                                    | 6374                                                |
| 25-29     | 0.00058                      | 54484                                                         | 22764                                                    | 9329                                                |
| 30-34     | 0.00087                      | 41817                                                         | 33454                                                    | 15406                                               |
| 35-39     | 0.00113                      | 43211                                                         | 31688                                                    | 17285                                               |
| 40-44     | 0.00148                      | 33507                                                         | 35867                                                    | 17933                                               |
| 45-49     | 0.00232                      | 19271                                                         | 32118                                                    | 17344                                               |
| 50-54     | 0.00343                      | 11638                                                         | 17955                                                    | 17290                                               |
| 55-59     | 0.00585                      | 9985                                                          | 14461                                                    | 9641                                                |

†Values used in this table are for the urban population

1 Initial value used in the stock of not-overweight population in 2005 for middle SES.

2 Initial value used in the stock of overweight population in 2005 for middle SES.

3 Initial value used in the stock of obese population in 2005 for middle SES.

**Table 73. Man mortality rates and population size by age group for the higher socioeconomic status population (Central region) †**

| Age group | Mortality rates (R) (%/year) | Not- overweight men in 2005 (Number of people) <sup>1</sup> | Overweight men in 2005 (Number of people) <sup>2</sup> | Obese men in 2005 (Number of people) <sup>3</sup> |
|-----------|------------------------------|-------------------------------------------------------------|--------------------------------------------------------|---------------------------------------------------|
| 0-4       | 0.00324                      | 100140                                                      | 23041                                                  | 9748                                              |
| 5-9       | 0.00036                      | 138505                                                      | 24835                                                  | 11462                                             |
| 10-14     | 0.00034                      | 142086                                                      | 28602                                                  | 9226                                              |
| 15-19     | 0.00167                      | 175843                                                      | 14387                                                  | 4796                                              |
| 20-24     | 0.00341                      | 130755                                                      | 37135                                                  | 8368                                              |
| 25-29     | 0.00337                      | 92878                                                       | 47918                                                  | 11240                                             |
| 30-34     | 0.00323                      | 58020                                                       | 59282                                                  | 16397                                             |
| 35-39     | 0.00309                      | 61909                                                       | 64462                                                  | 20423                                             |

|       |         |       |       |       |
|-------|---------|-------|-------|-------|
| 40-44 | 0.00336 | 57007 | 70927 | 19886 |
| 45-49 | 0.00443 | 49152 | 59610 | 15687 |
| 50-54 | 0.00641 | 37995 | 50831 | 15917 |
| 55-59 | 0.00895 | 26618 | 36013 | 16702 |

†Values used in this table are for the urban population

<sup>1</sup> Initial value used in the stock of not-overweight population in 2005 for higher SES.

<sup>2</sup> Initial value used in the stock of overweight population in 2005 for higher SES.

<sup>3</sup> Initial value used in the stock of obese population in 2005 for higher SES.

**Table 74. Women mortality rates and population size by age group for the higher socioeconomic status population (Central region) †**

| Age group | Mortality rates (R) (%/year) | Not- overweight women in 2005 (Number of people) <sup>1</sup> | Overweight women in 2005 (Number of people) <sup>2</sup> | Obese women in 2005 (Number of people) <sup>3</sup> |
|-----------|------------------------------|---------------------------------------------------------------|----------------------------------------------------------|-----------------------------------------------------|
| 0-4       | 0.00261                      | 98152                                                         | 23349                                                    | 6486                                                |
| 5-9       | 0.00024                      | 135525                                                        | 27564                                                    | 6125                                                |
| 10-14     | 0.00023                      | 139395                                                        | 24488                                                    | 11302                                               |
| 15-19     | 0.00047                      | 164573                                                        | 26307                                                    | 7342                                                |
| 20-24     | 0.00067                      | 148662                                                        | 32722                                                    | 8887                                                |
| 25-29     | 0.00058                      | 115971                                                        | 39179                                                    | 12146                                               |
| 30-34     | 0.00087                      | 93599                                                         | 40584                                                    | 17184                                               |
| 35-39     | 0.00113                      | 86630                                                         | 58966                                                    | 24023                                               |
| 40-44     | 0.00148                      | 82324                                                         | 61021                                                    | 27441                                               |
| 45-49     | 0.00232                      | 50816                                                         | 52733                                                    | 42506                                               |
| 50-54     | 0.00343                      | 31802                                                         | 55407                                                    | 35408                                               |
| 55-59     | 0.00585                      | 24774                                                         | 42514                                                    | 26915                                               |

†Values used in this table are for the urban population

<sup>1</sup> Initial value used in the stock of not-overweight population in 2005 for higher SES.

<sup>2</sup> Initial value used in the stock of overweight population in 2005 for higher SES.

<sup>3</sup> Initial value used in the stock of obese population in 2005 for higher SES.

**Table 75. Data and projections of the Fertility rates by department and Region (Central region) †**

| Year | Fecundity Rate Depto 05 | Fecundity Rate Depto 17 | Fecundity Rate Depto 18 | Fecundity Rate Depto 41 | Fecundity Rate Depto 63 | Fecundity Rate Depto 66 | Fecundity Rate Depto 73 | Average Fecundity Rate |
|------|-------------------------|-------------------------|-------------------------|-------------------------|-------------------------|-------------------------|-------------------------|------------------------|
| 2005 | 2,2791                  | 2,3096                  | 3,5656                  | 3,048                   | 2,2861                  | 2,2055                  | 2,7673                  | 2,637                  |
| 2006 | 2,2484                  | 2,2824                  | 3,5004                  | 2,9805                  | 2,2624                  | 2,182                   | 2,7292                  | 2,598                  |
| 2007 | 2,2177                  | 2,2552                  | 3,4352                  | 2,913                   | 2,2387                  | 2,1585                  | 2,6911                  | 2,558                  |
| 2008 | 2,187                   | 2,228                   | 3,37                    | 2,8455                  | 2,215                   | 2,135                   | 2,653                   | 2,519                  |
| 2009 | 2,1731                  | 2,2103                  | 3,3165                  | 2,8008                  | 2,2021                  | 2,125                   | 2,6222                  | 2,493                  |
| 2010 | 2,1592                  | 2,1926                  | 3,263                   | 2,7561                  | 2,1892                  | 2,115                   | 2,5914                  | 2,467                  |
| 2011 | 2,1453                  | 2,1749                  | 3,2095                  | 2,7114                  | 2,1763                  | 2,105                   | 2,5606                  | 2,440                  |
| 2012 | 2,1314                  | 2,1572                  | 3,156                   | 2,6667                  | 2,1634                  | 2,095                   | 2,5298                  | 2,414                  |
| 2013 | 2,1175                  | 2,1395                  | 3,1025                  | 2,622                   | 2,1505                  | 2,085                   | 2,499                   | 2,388                  |
| 2014 | 2,1117                  | 2,13                    | 3,0638                  | 2,5956                  | 2,1439                  | 2,0809                  | 2,478                   | 2,372                  |
| 2015 | 2,1059                  | 2,1205                  | 3,0251                  | 2,5692                  | 2,1373                  | 2,0768                  | 2,457                   | 2,356                  |
| 2016 | 2,1001                  | 2,111                   | 2,9864                  | 2,5428                  | 2,1307                  | 2,0727                  | 2,436                   | 2,340                  |
| 2017 | 2,0943                  | 2,1015                  | 2,9477                  | 2,5164                  | 2,1241                  | 2,0686                  | 2,415                   | 2,324                  |
| 2018 | 2,0885                  | 2,092                   | 2,909                   | 2,49                    | 2,1175                  | 2,0645                  | 2,394                   | 2,308                  |

| Year | Fecundity Rate Depto 05 | Fecundity Rate Depto 17 | Fecundity Rate Depto 18 | Fecundity Rate Depto 41 | Fecundity Rate Depto 63 | Fecundity Rate Depto 66 | Fecundity Rate Depto 73 | Average Fecundity Rate |
|------|-------------------------|-------------------------|-------------------------|-------------------------|-------------------------|-------------------------|-------------------------|------------------------|
| 2019 | 2,0827                  | 2,0825                  | 2,8703                  | 2,4636                  | 2,1109                  | 2,0604                  | 2,373                   | 2,292                  |
| 2020 | 2,0769                  | 2,073                   | 2,8316                  | 2,4372                  | 2,1043                  | 2,0563                  | 2,352                   | 2,276                  |
| 2021 | 2,0711                  | 2,0635                  | 2,7929                  | 2,4108                  | 2,0977                  | 2,0522                  | 2,331                   | 2,260                  |
| 2022 | 2,0653                  | 2,054                   | 2,7542                  | 2,3844                  | 2,0911                  | 2,0481                  | 2,31                    | 2,244                  |
| 2023 | 2,0595                  | 2,0445                  | 2,7155                  | 2,358                   | 2,0845                  | 2,044                   | 2,289                   | 2,228                  |
| 2024 | 2,0537                  | 2,035                   | 2,6768                  | 2,3316                  | 2,0779                  | 2,0399                  | 2,268                   | 2,212                  |
| 2025 | 2,0479                  | 2,0255                  | 2,6381                  | 2,3052                  | 2,0713                  | 2,0358                  | 2,247                   | 2,196                  |
| 2026 | 2,0421                  | 2,016                   | 2,5994                  | 2,2788                  | 2,0647                  | 2,0317                  | 2,226                   | 2,180                  |
| 2027 | 2,0363                  | 2,0065                  | 2,5607                  | 2,2524                  | 2,0581                  | 2,0276                  | 2,205                   | 2,164                  |
| 2028 | 2,0305                  | 1,997                   | 2,522                   | 2,226                   | 2,0515                  | 2,0235                  | 2,184                   | 2,148                  |
| 2029 | 2,0247                  | 1,9875                  | 2,4833                  | 2,1996                  | 2,0449                  | 2,0194                  | 2,163                   | 2,132                  |
| 2030 | 2,0189                  | 1,978                   | 2,4446                  | 2,1732                  | 2,0383                  | 2,0153                  | 2,142                   | 2,116                  |

† Data of Fertility rate of DANE [1] was used to forecast the department's fertility rate from 2005 to 2030. Holt-Winters no seasonal method in EViews 5 (Quantitative Micro Software, LLC) was used to forecast the fertility rate. In the SD model we used data from 2005 to 2030 and the region fertility rate was calculated as the average of all departments' fertility rates.

**Table 76. Fraction of births by departments, body mass index category, and socioeconomic status (Central region) †**

| Population group |                | Lower SES (%/year) | Middle SES (%/year) | Higher SES (%/year) | Complete Urban Population (%/year) |
|------------------|----------------|--------------------|---------------------|---------------------|------------------------------------|
| Department 5     | Not-overweight | 84,62%             | 76,19%              | 75,76%              | 78,75%                             |
|                  | Overweight     | 7,69%              | 19,05%              | 21,21%              | 16,25%                             |
|                  | Obese          | 7,69%              | 4,76%               | 3,03%               | 5,00%                              |
| Department 17    | Not-overweight | 83,33%             | 100,00%             | 88,89%              | 89,58%                             |
|                  | Overweight     | 16,67%             | 0,00%               | 11,11%              | 10,42%                             |
|                  | Obese          | 0,00%              | 0,00%               | 0,00%               | 0,00%                              |
| Department 18    | Not-overweight | 83,33%             | 100,00%             | 88,89%              | 89,58%                             |
|                  | Overweight     | 16,67%             | 0,00%               | 11,11%              | 10,42%                             |
|                  | Obese          | 0,00%              | 0,00%               | 0,00%               | 0,00%                              |
| Department 41    | Not-overweight | 93,33%             | 100,00%             | 100,00%             | 97,78%                             |
|                  | Overweight     | 6,67%              | 0,00%               | 0,00%               | 2,22%                              |
|                  | Obese          | 0,00%              | 0,00%               | 0,00%               | 0,00%                              |
| Department 63    | Not-overweight | 100,00%            | 86,67%              | 72,22%              | 82,50%                             |
|                  | Overweight     | 0,00%              | 13,33%              | 16,67%              | 12,50%                             |
|                  | Obese          | 0,00%              | 0,00%               | 11,11%              | 5,00%                              |
| Department 66    | Not-overweight | 84,62%             | 76,19%              | 75,76%              | 78,75%                             |
|                  | Overweight     | 7,69%              | 19,05%              | 21,21%              | 16,25%                             |
|                  | Obese          | 7,69%              | 4,76%               | 3,03%               | 5,00%                              |
| Department 73    | Not-overweight | 60,00%             | 69,57%              | 76,47%              | 69,09%                             |
|                  | Overweight     | 33,33%             | 17,39%              | 23,53%              | 23,64%                             |
|                  | Obese          | 6,67%              | 13,04%              | 0,00%               | 7,27%                              |

† The fractions of births by each BMI category correspond to the prevalences by BMI category of children aged

0 to 12 months

**Table 77. Prevalent rates of entire population by age group, and body mass index category (Central region)**

| Departments   | Age group | Not- overweight in 2005 | Overweight in 2005 | Obese in 2005 | Not- overweight in 2010 | Overweight in 2010 | Obese in 2010 |
|---------------|-----------|-------------------------|--------------------|---------------|-------------------------|--------------------|---------------|
| Department 5  | 0-4       | 0.83732                 | 0.11005            | 0.05263       | 0.74096                 | 0.22139            | 0.03765       |
|               | 5-9       | 0.83732                 | 0.11005            | 0.05263       | 0.74119                 | 0.17751            | 0.08130       |
|               | 10-14     | 0.83691                 | 0.11159            | 0.05150       | 0.79765                 | 0.14941            | 0.05294       |
|               | 15-19     | 0.86711                 | 0.11628            | 0.01661       | 0.83252                 | 0.12136            | 0.04612       |
|               | 20-24     | 0.78987                 | 0.16456            | 0.04557       | 0.75272                 | 0.18750            | 0.05978       |
|               | 25-29     | 0.69325                 | 0.23926            | 0.06748       | 0.59807                 | 0.31672            | 0.08521       |
|               | 30-34     | 0.55319                 | 0.33333            | 0.11348       | 0.46724                 | 0.38276            | 0.15000       |
|               | 35-39     | 0.46687                 | 0.40060            | 0.13253       | 0.40039                 | 0.43195            | 0.16765       |
|               | 40-44     | 0.52381                 | 0.34603            | 0.13016       | 0.37862                 | 0.42935            | 0.19203       |
|               | 45-49     | 0.43949                 | 0.38854            | 0.17197       | 0.40541                 | 0.41261            | 0.18198       |
|               | 50-54     | 0.40249                 | 0.39834            | 0.19917       | 0.30097                 | 0.45243            | 0.24660       |
| 55-59         | 0.40113   | 0.39548                 | 0.20339            | 0.36705       | 0.39306                 | 0.23988            |               |
| Department 17 | 0-4       | 0.71724                 | 0.15172            | 0.13103       | 0.77470                 | 0.18972            | 0.03557       |
|               | 5-9       | 0.87671                 | 0.10959            | 0.01370       | 0.74859                 | 0.15254            | 0.09887       |
|               | 10-14     | 0.81707                 | 0.17073            | 0.01220       | 0.80000                 | 0.15802            | 0.04198       |
|               | 15-19     | 0.88462                 | 0.07692            | 0.03846       | 0.86190                 | 0.11429            | 0.02381       |
|               | 20-24     | 0.79167                 | 0.15476            | 0.05357       | 0.74845                 | 0.21118            | 0.04037       |
|               | 25-29     | 0.75000                 | 0.16379            | 0.08621       | 0.55918                 | 0.33061            | 0.11020       |
|               | 30-34     | 0.62185                 | 0.28571            | 0.09244       | 0.47917                 | 0.35000            | 0.17083       |
|               | 35-39     | 0.53623                 | 0.33333            | 0.13043       | 0.39922                 | 0.42248            | 0.17829       |
|               | 40-44     | 0.39695                 | 0.48855            | 0.11450       | 0.45588                 | 0.33824            | 0.20588       |
|               | 45-49     | 0.41818                 | 0.40000            | 0.18182       | 0.35985                 | 0.43939            | 0.20076       |
|               | 50-54     | 0.31068                 | 0.51456            | 0.17476       | 0.32031                 | 0.45703            | 0.22266       |
| 55-59         | 0.37624   | 0.34653                 | 0.27723            | 0.39791       | 0.37696                 | 0.22513            |               |
| Department 18 | 0-4       | 0.80702                 | 0.17105            | 0.02193       | 0.76923                 | 0.20000            | 0.03077       |
|               | 5-9       | 0.81579                 | 0.14474            | 0.03947       | 0.79252                 | 0.12925            | 0.07823       |
|               | 10-14     | 0.86765                 | 0.10294            | 0.02941       | 0.79016                 | 0.15410            | 0.05574       |
|               | 15-19     | 0.81188                 | 0.14851            | 0.03960       | 0.79839                 | 0.14919            | 0.05242       |
|               | 20-24     | 0.77640                 | 0.13043            | 0.09317       | 0.63291                 | 0.28481            | 0.08228       |
|               | 25-29     | 0.66400                 | 0.22400            | 0.11200       | 0.52542                 | 0.32203            | 0.15254       |
|               | 30-34     | 0.50420                 | 0.30252            | 0.19328       | 0.36000                 | 0.40571            | 0.23429       |
|               | 35-39     | 0.37647                 | 0.34118            | 0.28235       | 0.30469                 | 0.45313            | 0.24219       |
|               | 40-44     | 0.40476                 | 0.35714            | 0.23810       | 0.25197                 | 0.49606            | 0.25197       |
|               | 45-49     | 0.31169                 | 0.36364            | 0.32468       | 0.26667                 | 0.33333            | 0.40000       |
|               | 50-54     | 0.22667                 | 0.44000            | 0.33333       | 0.17355                 | 0.43802            | 0.38843       |
| 55-59         | 0.34043   | 0.34043                 | 0.31915            | 0.26250       | 0.38750                 | 0.35000            |               |
| Department 41 | 0-4       | 0.67130                 | 0.24074            | 0.08796       | 0.77959                 | 0.17551            | 0.04490       |
|               | 5-9       | 0.78571                 | 0.15873            | 0.05556       | 0.76015                 | 0.14391            | 0.09594       |
|               | 10-14     | 0.76316                 | 0.15789            | 0.07895       | 0.73256                 | 0.17442            | 0.09302       |
|               | 15-19     | 0.78992                 | 0.18487            | 0.02521       | 0.81227                 | 0.14440            | 0.04332       |
|               | 20-24     | 0.70000                 | 0.22500            | 0.07500       | 0.67347                 | 0.20408            | 0.12245       |



| Departments      | Age group        | Not- overweight<br>in 2005 | Overweight<br>in 2005 | Obese in<br>2005 | Not- overweight<br>in 2010 | Overweight<br>in 2010 | Obese in<br>2010 |
|------------------|------------------|----------------------------|-----------------------|------------------|----------------------------|-----------------------|------------------|
|                  | 25-29            | 0.56115                    | 0.33813               | 0.10072          | 0.51445                    | 0.30636               | 0.17919          |
|                  | 30-34            | 0.48428                    | 0.40881               | 0.10692          | 0.45882                    | 0.34118               | 0.20000          |
|                  | 35-39            | 0.40816                    | 0.40816               | 0.18367          | 0.38571                    | 0.37143               | 0.24286          |
|                  | 40-44            | 0.33813                    | 0.45324               | 0.20863          | 0.25984                    | 0.39370               | 0.34646          |
|                  | 45-49            | 0.23881                    | 0.45522               | 0.30597          | 0.18978                    | 0.53285               | 0.27737          |
|                  | 50-54            | 0.26786                    | 0.43750               | 0.29464          | 0.20930                    | 0.47287               | 0.31783          |
|                  | 55-59            | 0.25000                    | 0.43750               | 0.31250          | 0.25000                    | 0.41667               | 0.33333          |
| Department<br>63 | 0-4              | 0.76531                    | 0.17347               | 0.06122          | 0.74093                    | 0.20984               | 0.04922          |
|                  | 5-9              | 0.75893                    | 0.19643               | 0.04464          | 0.78497                    | 0.13987               | 0.07516          |
|                  | 10-14            | 0.85470                    | 0.12821               | 0.01709          | 0.78261                    | 0.17202               | 0.04537          |
|                  | 15-19            | 0.90604                    | 0.06040               | 0.03356          | 0.83559                    | 0.12959               | 0.03482          |
|                  | 20-24            | 0.81702                    | 0.15319               | 0.02979          | 0.73990                    | 0.18939               | 0.07071          |
|                  | 25-29            | 0.65652                    | 0.28261               | 0.06087          | 0.54593                    | 0.33333               | 0.12073          |
|                  | 30-34            | 0.59172                    | 0.32544               | 0.08284          | 0.50000                    | 0.38050               | 0.11950          |
|                  | 35-39            | 0.51208                    | 0.35749               | 0.13043          | 0.43599                    | 0.39100               | 0.17301          |
|                  | 40-44            | 0.52404                    | 0.29327               | 0.18269          | 0.39106                    | 0.38547               | 0.22346          |
|                  | 45-49            | 0.41627                    | 0.41148               | 0.17225          | 0.36792                    | 0.43082               | 0.20126          |
|                  | 50-54            | 0.37126                    | 0.43713               | 0.19162          | 0.34516                    | 0.39677               | 0.25806          |
|                  | 55-59            | 0.30370                    | 0.47407               | 0.22222          | 0.30000                    | 0.41071               | 0.28929          |
|                  | Department<br>66 | 0-4                        | 0.76531               | 0.17347          | 0.06122                    | 0.75146               | 0.19298          |
| 5-9              |                  | 0.75893                    | 0.19643               | 0.04464          | 0.75234                    | 0.15888               | 0.08879          |
| 10-14            |                  | 0.85470                    | 0.12821               | 0.01709          | 0.78959                    | 0.16742               | 0.04299          |
| 15-19            |                  | 0.90604                    | 0.06040               | 0.03356          | 0.85412                    | 0.11529               | 0.03059          |
| 20-24            |                  | 0.81702                    | 0.15319               | 0.02979          | 0.75068                    | 0.20000               | 0.04932          |
| 25-29            |                  | 0.65652                    | 0.28261               | 0.06087          | 0.60188                    | 0.28213               | 0.11599          |
| 30-34            |                  | 0.59172                    | 0.32544               | 0.08284          | 0.53974                    | 0.30795               | 0.15232          |
| 35-39            |                  | 0.51208                    | 0.35749               | 0.13043          | 0.47101                    | 0.38406               | 0.14493          |
| 40-44            |                  | 0.52404                    | 0.29327               | 0.18269          | 0.42593                    | 0.41049               | 0.16358          |
| 45-49            |                  | 0.41627                    | 0.41148               | 0.17225          | 0.38276                    | 0.42759               | 0.18966          |
| 50-54            |                  | 0.37126                    | 0.43713               | 0.19162          | 0.36161                    | 0.41518               | 0.22321          |
| 55-59            |                  | 0.30841                    | 0.48598               | 0.20561          | 0.31579                    | 0.45175               | 0.23246          |
| Department<br>73 |                  | 0-4                        | 0.67130               | 0.24074          | 0.08796                    | 0.72204               | 0.20767          |
|                  | 5-9              | 0.78571                    | 0.15873               | 0.05556          | 0.78593                    | 0.15596               | 0.05810          |
|                  | 10-14            | 0.76316                    | 0.15789               | 0.07895          | 0.78526                    | 0.16346               | 0.05128          |
|                  | 15-19            | 0.78992                    | 0.18487               | 0.02521          | 0.81961                    | 0.13725               | 0.04314          |
|                  | 20-24            | 0.70000                    | 0.22500               | 0.07500          | 0.67895                    | 0.22632               | 0.09474          |
|                  | 25-29            | 0.56115                    | 0.33813               | 0.10072          | 0.57222                    | 0.26667               | 0.16111          |
|                  | 30-34            | 0.48428                    | 0.40881               | 0.10692          | 0.38509                    | 0.39130               | 0.22360          |
|                  | 35-39            | 0.40816                    | 0.40816               | 0.18367          | 0.36496                    | 0.36496               | 0.27007          |
|                  | 40-44            | 0.33813                    | 0.45324               | 0.20863          | 0.34066                    | 0.45604               | 0.20330          |
|                  | 45-49            | 0.23881                    | 0.45522               | 0.30597          | 0.23913                    | 0.47826               | 0.28261          |
|                  | 50-54            | 0.26786                    | 0.43750               | 0.29464          | 0.23649                    | 0.44595               | 0.31757          |
|                  | 55-59            | 0.25000                    | 0.43750               | 0.31250          | 0.28682                    | 0.38760               | 0.32558          |

**Table 78. Prevalent rates of lower socioeconomic status population by age group, and body mass index category (Central region)**

| Departments   | Age group | Not- overweight in 2005 | Overweight in 2005 | Obese in 2005 | Not- overweight in 2010 | Overweight in 2010 | Obese in 2010 |
|---------------|-----------|-------------------------|--------------------|---------------|-------------------------|--------------------|---------------|
| Department 5  | 0-4       | 0.85294                 | 0.11765            | 0.02941       | 0.75978                 | 0.18994            | 0.05028       |
|               | 5-9       | 0.85294                 | 0.11765            | 0.02941       | 0.87425                 | 0.10778            | 0.01796       |
|               | 10-14     | 0.88235                 | 0.09804            | 0.01961       | 0.87166                 | 0.09626            | 0.03209       |
|               | 15-19     | 0.88406                 | 0.11594            | 0.00000       | 0.82609                 | 0.13043            | 0.04348       |
|               | 20-24     | 0.77778                 | 0.13889            | 0.08333       | 0.80000                 | 0.13600            | 0.06400       |
|               | 25-29     | 0.61404                 | 0.33333            | 0.05263       | 0.66337                 | 0.25743            | 0.07921       |
|               | 30-34     | 0.43902                 | 0.41463            | 0.14634       | 0.45745                 | 0.35106            | 0.19149       |
|               | 35-39     | 0.46939                 | 0.42857            | 0.10204       | 0.39241                 | 0.39241            | 0.21519       |
|               | 40-44     | 0.44000                 | 0.34000            | 0.22000       | 0.38667                 | 0.42667            | 0.18667       |
|               | 45-49     | 0.46000                 | 0.42000            | 0.12000       | 0.45714                 | 0.32857            | 0.21429       |
|               | 50-54     | 0.56522                 | 0.32609            | 0.10870       | 0.39655                 | 0.41379            | 0.18966       |
| 55-59         | 0.55556   | 0.25926                 | 0.18519            | 0.54902       | 0.33333                 | 0.11765            |               |
| Department 17 | 0-4       | 0.68421                 | 0.28947            | 0.02632       | 0.81538                 | 0.15385            | 0.03077       |
|               | 5-9       | 0.91667                 | 0.08333            | 0.00000       | 0.84158                 | 0.08911            | 0.06931       |
|               | 10-14     | 0.75000                 | 0.25000            | 0.00000       | 0.86735                 | 0.10204            | 0.03061       |
|               | 15-19     | 0.93750                 | 0.06250            | 0.00000       | 0.88372                 | 0.11628            | 0.00000       |
|               | 20-24     | 0.76000                 | 0.20000            | 0.04000       | 0.80822                 | 0.15068            | 0.04110       |
|               | 25-29     | 0.84000                 | 0.12000            | 0.04000       | 0.62791                 | 0.25581            | 0.11628       |
|               | 30-34     | 0.61111                 | 0.27778            | 0.11111       | 0.58696                 | 0.30435            | 0.10870       |
|               | 35-39     | 0.63158                 | 0.26316            | 0.10526       | 0.46000                 | 0.34000            | 0.20000       |
|               | 40-44     | 0.14286                 | 0.57143            | 0.28571       | 0.51020                 | 0.28571            | 0.20408       |
|               | 45-49     | 0.56000                 | 0.40000            | 0.04000       | 0.37500                 | 0.39583            | 0.22917       |
|               | 50-54     | 0.46154                 | 0.38462            | 0.15385       | 0.43182                 | 0.38636            | 0.18182       |
| 55-59         | 0.52381   | 0.19048                 | 0.28571            | 0.38710       | 0.35484                 | 0.25806            |               |
| Department 18 | 0-4       | 0.77778                 | 0.20000            | 0.02222       | 0.75362                 | 0.21014            | 0.03623       |
|               | 5-9       | 0.77273                 | 0.18182            | 0.04545       | 0.81646                 | 0.12658            | 0.05696       |
|               | 10-14     | 0.84000                 | 0.12000            | 0.04000       | 0.81395                 | 0.12791            | 0.05814       |
|               | 15-19     | 0.74074                 | 0.22222            | 0.03704       | 0.78358                 | 0.14925            | 0.06716       |
|               | 20-24     | 0.88000                 | 0.06000            | 0.06000       | 0.69118                 | 0.22059            | 0.08824       |
|               | 25-29     | 0.70000                 | 0.23333            | 0.06667       | 0.56250                 | 0.30000            | 0.13750       |
|               | 30-34     | 0.53125                 | 0.34375            | 0.12500       | 0.38947                 | 0.38947            | 0.22105       |
|               | 35-39     | 0.20000                 | 0.48000            | 0.32000       | 0.30159                 | 0.41270            | 0.28571       |
|               | 40-44     | 0.33333                 | 0.50000            | 0.16667       | 0.26923                 | 0.48077            | 0.25000       |
|               | 45-49     | 0.53846                 | 0.30769            | 0.15385       | 0.33333                 | 0.41667            | 0.25000       |
|               | 50-54     | 0.35000                 | 0.40000            | 0.25000       | 0.22951                 | 0.40984            | 0.36066       |
| 55-59         | 0.50000   | 0.35714                 | 0.14286            | 0.27273       | 0.48485                 | 0.24242            |               |
| Department 41 | 0-4       | 0.70769                 | 0.20000            | 0.09231       | 0.72308                 | 0.24615            | 0.03077       |
|               | 5-9       | 0.82609                 | 0.17391            | 0.00000       | 0.84211                 | 0.12281            | 0.03509       |
|               | 10-14     | 0.88889                 | 0.11111            | 0.00000       | 0.91667                 | 0.08333            | 0.00000       |
|               | 15-19     | 0.80769                 | 0.19231            | 0.00000       | 0.85714                 | 0.11905            | 0.02381       |
|               | 20-24     | 0.68966                 | 0.20690            | 0.10345       | 0.72222                 | 0.11111            | 0.16667       |
|               | 25-29     | 0.70370                 | 0.25926            | 0.03704       | 0.58621                 | 0.24138            | 0.17241       |
|               | 30-34     | 0.53333                 | 0.43333            | 0.03333       | 0.51613                 | 0.25806            | 0.22581       |

| Departments      | Age group        | Not- overweight<br>in 2005 | Overweight<br>in 2005 | Obese in<br>2005 | Not- overweight<br>in 2010 | Overweight<br>in 2010 | Obese in<br>2010 |
|------------------|------------------|----------------------------|-----------------------|------------------|----------------------------|-----------------------|------------------|
|                  | 35-39            | 0.42105                    | 0.42105               | 0.15789          | 0.45000                    | 0.45000               | 0.10000          |
|                  | 40-44            | 0.52941                    | 0.17647               | 0.29412          | 0.50000                    | 0.35714               | 0.14286          |
|                  | 45-49            | 0.29412                    | 0.58824               | 0.11765          | 0.25000                    | 0.50000               | 0.25000          |
|                  | 50-54            | 0.26667                    | 0.53333               | 0.20000          | 0.14286                    | 0.57143               | 0.28571          |
|                  | 55-59            | 0.45455                    | 0.27273               | 0.27273          | 0.35714                    | 0.14286               | 0.50000          |
| Department<br>63 | 0-4              | 0.92405                    | 0.05063               | 0.02532          | 0.77551                    | 0.16327               | 0.06122          |
|                  | 5-9              | 0.87879                    | 0.12121               | 0.00000          | 0.85185                    | 0.09877               | 0.04938          |
|                  | 10-14            | 0.96552                    | 0.03448               | 0.00000          | 0.85915                    | 0.11268               | 0.02817          |
|                  | 15-19            | 0.87500                    | 0.12500               | 0.00000          | 0.87097                    | 0.11290               | 0.01613          |
|                  | 20-24            | 0.89655                    | 0.10345               | 0.00000          | 0.77273                    | 0.22727               | 0.00000          |
|                  | 25-29            | 0.63158                    | 0.23684               | 0.13158          | 0.59184                    | 0.30612               | 0.10204          |
|                  | 30-34            | 0.59459                    | 0.35135               | 0.05405          | 0.55000                    | 0.35000               | 0.10000          |
|                  | 35-39            | 0.58974                    | 0.28205               | 0.12821          | 0.51429                    | 0.37143               | 0.11429          |
|                  | 40-44            | 0.43478                    | 0.26087               | 0.30435          | 0.45000                    | 0.35000               | 0.20000          |
|                  | 45-49            | 0.45000                    | 0.45000               | 0.10000          | 0.41176                    | 0.35294               | 0.23529          |
|                  | 50-54            | 0.54545                    | 0.36364               | 0.09091          | 0.43478                    | 0.30435               | 0.26087          |
|                  | 55-59            | 0.28571                    | 0.42857               | 0.28571          | 0.42308                    | 0.30769               | 0.26923          |
|                  | Department<br>66 | 0-4                        | 0.92405               | 0.05063          | 0.02532                    | 0.78873               | 0.18310          |
| 5-9              |                  | 0.87879                    | 0.12121               | 0.00000          | 0.83750                    | 0.12500               | 0.03750          |
| 10-14            |                  | 0.96552                    | 0.03448               | 0.00000          | 0.92754                    | 0.07246               | 0.00000          |
| 15-19            |                  | 0.87500                    | 0.12500               | 0.00000          | 0.86207                    | 0.10345               | 0.03448          |
| 20-24            |                  | 0.89655                    | 0.10345               | 0.00000          | 0.77358                    | 0.15094               | 0.07547          |
| 25-29            |                  | 0.63158                    | 0.23684               | 0.13158          | 0.67442                    | 0.23256               | 0.09302          |
| 30-34            |                  | 0.59459                    | 0.35135               | 0.05405          | 0.65116                    | 0.20930               | 0.13953          |
| 35-39            |                  | 0.58974                    | 0.28205               | 0.12821          | 0.58065                    | 0.35484               | 0.06452          |
| 40-44            |                  | 0.43478                    | 0.26087               | 0.30435          | 0.61765                    | 0.32353               | 0.05882          |
| 45-49            |                  | 0.45000                    | 0.45000               | 0.10000          | 0.50000                    | 0.30000               | 0.20000          |
| 50-54            |                  | 0.54545                    | 0.36364               | 0.09091          | 0.57143                    | 0.33333               | 0.09524          |
| 55-59            |                  | 0.28571                    | 0.42857               | 0.28571          | 0.43478                    | 0.43478               | 0.13043          |
| Department<br>73 |                  | 0-4                        | 0.70769               | 0.20000          | 0.09231                    | 0.73034               | 0.19101          |
|                  | 5-9              | 0.82609                    | 0.17391               | 0.00000          | 0.85714                    | 0.10989               | 0.03297          |
|                  | 10-14            | 0.88889                    | 0.11111               | 0.00000          | 0.83824                    | 0.11765               | 0.04412          |
|                  | 15-19            | 0.80769                    | 0.19231               | 0.00000          | 0.81818                    | 0.16364               | 0.01818          |
|                  | 20-24            | 0.68966                    | 0.20690               | 0.10345          | 0.67500                    | 0.17500               | 0.15000          |
|                  | 25-29            | 0.70370                    | 0.25926               | 0.03704          | 0.68182                    | 0.11364               | 0.20455          |
|                  | 30-34            | 0.53333                    | 0.43333               | 0.03333          | 0.44828                    | 0.34483               | 0.20690          |
|                  | 35-39            | 0.42105                    | 0.42105               | 0.15789          | 0.46875                    | 0.25000               | 0.28125          |
|                  | 40-44            | 0.52941                    | 0.17647               | 0.29412          | 0.31034                    | 0.27586               | 0.41379          |
|                  | 45-49            | 0.29412                    | 0.58824               | 0.11765          | 0.45161                    | 0.38710               | 0.16129          |
|                  | 50-54            | 0.26667                    | 0.53333               | 0.20000          | 0.28125                    | 0.43750               | 0.28125          |
|                  | 55-59            | 0.45455                    | 0.27273               | 0.27273          | 0.50000                    | 0.27778               | 0.22222          |

**Table 79. Prevalent rates of middle socioeconomic status population by age group, and body mass index category (Central region)**

| Departments   | Age group | Not- overweight in 2005 | Overweight in 2005 | Obese in 2005 | Not- overweight in 2010 | Overweight in 2010 | Obese in 2010 |
|---------------|-----------|-------------------------|--------------------|---------------|-------------------------|--------------------|---------------|
| Department 5  | 0-4       | 0.85294                 | 0.11765            | 0.02941       | 0.72464                 | 0.26570            | 0.00966       |
|               | 5-9       | 0.85294                 | 0.11765            | 0.02941       | 0.72566                 | 0.18142            | 0.09292       |
|               | 10-14     | 0.88235                 | 0.09804            | 0.01961       | 0.82022                 | 0.13483            | 0.04494       |
|               | 15-19     | 0.88406                 | 0.11594            | 0.00000       | 0.85774                 | 0.09623            | 0.04603       |
|               | 20-24     | 0.77778                 | 0.13889            | 0.08333       | 0.78509                 | 0.17544            | 0.03947       |
|               | 25-29     | 0.61404                 | 0.33333            | 0.05263       | 0.59896                 | 0.31250            | 0.08854       |
|               | 30-34     | 0.43902                 | 0.41463            | 0.14634       | 0.42623                 | 0.42623            | 0.14754       |
|               | 35-39     | 0.46939                 | 0.42857            | 0.10204       | 0.47682                 | 0.37748            | 0.14570       |
|               | 40-44     | 0.44000                 | 0.34000            | 0.22000       | 0.36306                 | 0.35032            | 0.28662       |
|               | 45-49     | 0.46000                 | 0.42000            | 0.12000       | 0.42857                 | 0.39456            | 0.17687       |
|               | 50-54     | 0.56522                 | 0.32609            | 0.10870       | 0.29861                 | 0.44444            | 0.25694       |
| 55-59         | 0.55556   | 0.25926                 | 0.18519            | 0.35526       | 0.39474                 | 0.25000            |               |
| Department 17 | 0-4       | 0.69231                 | 0.15385            | 0.15385       | 0.73034                 | 0.22472            | 0.04494       |
|               | 5-9       | 0.84000                 | 0.16000            | 0.00000       | 0.79439                 | 0.14019            | 0.06542       |
|               | 10-14     | 0.82143                 | 0.17857            | 0.00000       | 0.83471                 | 0.10744            | 0.05785       |
|               | 15-19     | 0.88000                 | 0.08000            | 0.04000       | 0.84559                 | 0.11765            | 0.03676       |
|               | 20-24     | 0.84783                 | 0.10870            | 0.04348       | 0.71765                 | 0.20000            | 0.08235       |
|               | 25-29     | 0.74194                 | 0.19355            | 0.06452       | 0.48684                 | 0.35526            | 0.15789       |
|               | 30-34     | 0.63636                 | 0.30303            | 0.06061       | 0.47826                 | 0.33696            | 0.18478       |
|               | 35-39     | 0.50000                 | 0.44444            | 0.05556       | 0.36364                 | 0.38961            | 0.24675       |
|               | 40-44     | 0.34483                 | 0.55172            | 0.10345       | 0.43590                 | 0.38462            | 0.17949       |
|               | 45-49     | 0.40000                 | 0.51429            | 0.08571       | 0.33766                 | 0.46753            | 0.19481       |
|               | 50-54     | 0.26087                 | 0.43478            | 0.30435       | 0.25882                 | 0.51765            | 0.22353       |
| 55-59         | 0.45455   | 0.45455                 | 0.09091            | 0.49153       | 0.28814                 | 0.22034            |               |
| Department 18 | 0-4       | 0.77778                 | 0.20000            | 0.02222       | 0.79048                 | 0.19048            | 0.01905       |
|               | 5-9       | 0.77273                 | 0.18182            | 0.04545       | 0.77273                 | 0.14545            | 0.08182       |
|               | 10-14     | 0.84000                 | 0.12000            | 0.04000       | 0.77679                 | 0.16964            | 0.05357       |
|               | 15-19     | 0.74074                 | 0.22222            | 0.03704       | 0.81395                 | 0.16279            | 0.02326       |
|               | 20-24     | 0.88000                 | 0.06000            | 0.06000       | 0.67164                 | 0.25373            | 0.07463       |
|               | 25-29     | 0.70000                 | 0.23333            | 0.06667       | 0.47945                 | 0.34247            | 0.17808       |
|               | 30-34     | 0.53125                 | 0.34375            | 0.12500       | 0.32258                 | 0.43548            | 0.24194       |
|               | 35-39     | 0.20000                 | 0.48000            | 0.32000       | 0.32692                 | 0.48077            | 0.19231       |
|               | 40-44     | 0.33333                 | 0.50000            | 0.16667       | 0.28070                 | 0.50877            | 0.21053       |
|               | 45-49     | 0.53846                 | 0.30769            | 0.15385       | 0.24074                 | 0.31481            | 0.44444       |
|               | 50-54     | 0.35000                 | 0.40000            | 0.25000       | 0.07143                 | 0.52381            | 0.40476       |
| 55-59         | 0.50000   | 0.35714                 | 0.14286            | 0.30303       | 0.36364                 | 0.33333            |               |
| Department 41 | 0-4       | 0.70769                 | 0.20000            | 0.09231       | 0.78571                 | 0.14286            | 0.07143       |
|               | 5-9       | 0.82609                 | 0.17391            | 0.00000       | 0.78641                 | 0.11650            | 0.09709       |
|               | 10-14     | 0.88889                 | 0.11111            | 0.00000       | 0.70297                 | 0.18812            | 0.10891       |
|               | 15-19     | 0.80769                 | 0.19231            | 0.00000       | 0.73636                 | 0.19091            | 0.07273       |
|               | 20-24     | 0.68966                 | 0.20690            | 0.10345       | 0.62791                 | 0.24419            | 0.12791       |
|               | 25-29     | 0.70370                 | 0.25926            | 0.03704       | 0.56250                 | 0.25000            | 0.18750       |
|               | 30-34     | 0.53333                 | 0.43333            | 0.03333       | 0.44898                 | 0.32653            | 0.22449       |
|               | 35-39     | 0.42105                 | 0.42105            | 0.15789       | 0.27660                 | 0.42553            | 0.29787       |
| 40-44         | 0.52941   | 0.17647                 | 0.29412            | 0.18000       | 0.42000                 | 0.40000            |               |

| Departments      | Age group | Not- overweight<br>in 2005 | Overweight<br>in 2005 | Obese in<br>2005 | Not- overweight<br>in 2010 | Overweight<br>in 2010 | Obese in<br>2010 |
|------------------|-----------|----------------------------|-----------------------|------------------|----------------------------|-----------------------|------------------|
|                  | 45-49     | 0.29412                    | 0.58824               | 0.11765          | 0.19608                    | 0.52941               | 0.27451          |
|                  | 50-54     | 0.26667                    | 0.53333               | 0.20000          | 0.22222                    | 0.51111               | 0.26667          |
|                  | 55-59     | 0.45455                    | 0.27273               | 0.27273          | 0.19231                    | 0.46154               | 0.34615          |
| Department<br>63 | 0-4       | 0.92405                    | 0.05063               | 0.02532          | 0.74684                    | 0.20886               | 0.04430          |
|                  | 5-9       | 0.87879                    | 0.12121               | 0.00000          | 0.77895                    | 0.14211               | 0.07895          |
|                  | 10-14     | 0.96552                    | 0.03448               | 0.00000          | 0.78713                    | 0.17327               | 0.03960          |
|                  | 15-19     | 0.87500                    | 0.12500               | 0.00000          | 0.87647                    | 0.10588               | 0.01765          |
|                  | 20-24     | 0.89655                    | 0.10345               | 0.00000          | 0.72727                    | 0.16970               | 0.10303          |
|                  | 25-29     | 0.63158                    | 0.23684               | 0.13158          | 0.48905                    | 0.35766               | 0.15328          |
|                  | 30-34     | 0.59459                    | 0.35135               | 0.05405          | 0.44860                    | 0.40187               | 0.14953          |
|                  | 35-39     | 0.58974                    | 0.28205               | 0.12821          | 0.42718                    | 0.42718               | 0.14563          |
|                  | 40-44     | 0.43478                    | 0.26087               | 0.30435          | 0.37719                    | 0.39474               | 0.22807          |
|                  | 45-49     | 0.45000                    | 0.45000               | 0.10000          | 0.41837                    | 0.40816               | 0.17347          |
|                  | 50-54     | 0.54545                    | 0.36364               | 0.09091          | 0.42353                    | 0.38824               | 0.18824          |
|                  | 55-59     | 0.28571                    | 0.42857               | 0.28571          | 0.25000                    | 0.40278               | 0.34722          |
| Department<br>66 | 0-4       | 0.85294                    | 0.11765               | 0.02941          | 0.71901                    | 0.25620               | 0.02479          |
|                  | 5-9       | 0.85294                    | 0.11765               | 0.02941          | 0.76471                    | 0.16340               | 0.07190          |
|                  | 10-14     | 0.88235                    | 0.09804               | 0.01961          | 0.76433                    | 0.19745               | 0.03822          |
|                  | 15-19     | 0.88406                    | 0.11594               | 0.00000          | 0.85385                    | 0.11538               | 0.03077          |
|                  | 20-24     | 0.77778                    | 0.13889               | 0.08333          | 0.77692                    | 0.16154               | 0.06154          |
|                  | 25-29     | 0.61404                    | 0.33333               | 0.05263          | 0.65217                    | 0.21739               | 0.13043          |
|                  | 30-34     | 0.43902                    | 0.41463               | 0.14634          | 0.51515                    | 0.28283               | 0.20202          |
|                  | 35-39     | 0.46939                    | 0.42857               | 0.10204          | 0.48515                    | 0.38614               | 0.12871          |
|                  | 40-44     | 0.44000                    | 0.34000               | 0.22000          | 0.40230                    | 0.36782               | 0.22989          |
|                  | 45-49     | 0.46000                    | 0.42000               | 0.12000          | 0.46988                    | 0.37349               | 0.15663          |
|                  | 50-54     | 0.56522                    | 0.32609               | 0.10870          | 0.36145                    | 0.31325               | 0.32530          |
|                  | 55-59     | 0.55556                    | 0.25926               | 0.18519          | 0.28788                    | 0.48485               | 0.22727          |
| Department<br>73 | 0-4       | 0.70769                    | 0.20000               | 0.09231          | 0.77600                    | 0.18400               | 0.04000          |
|                  | 5-9       | 0.82609                    | 0.17391               | 0.00000          | 0.77273                    | 0.14545               | 0.08182          |
|                  | 10-14     | 0.88889                    | 0.11111               | 0.00000          | 0.79630                    | 0.14815               | 0.05556          |
|                  | 15-19     | 0.80769                    | 0.19231               | 0.00000          | 0.82051                    | 0.15385               | 0.02564          |
|                  | 20-24     | 0.68966                    | 0.20690               | 0.10345          | 0.70000                    | 0.24286               | 0.05714          |
|                  | 25-29     | 0.70370                    | 0.25926               | 0.03704          | 0.58824                    | 0.25490               | 0.15686          |
|                  | 30-34     | 0.53333                    | 0.43333               | 0.03333          | 0.43103                    | 0.44828               | 0.12069          |
|                  | 35-39     | 0.42105                    | 0.42105               | 0.15789          | 0.30769                    | 0.46154               | 0.23077          |
|                  | 40-44     | 0.52941                    | 0.17647               | 0.29412          | 0.37288                    | 0.42373               | 0.20339          |
|                  | 45-49     | 0.29412                    | 0.58824               | 0.11765          | 0.18966                    | 0.55172               | 0.25862          |
|                  | 50-54     | 0.26667                    | 0.53333               | 0.20000          | 0.39286                    | 0.46429               | 0.14286          |
|                  | 55-59     | 0.45455                    | 0.27273               | 0.27273          | 0.35000                    | 0.30000               | 0.35000          |

**Table 80. Prevalent rates of higher socioeconomic status population by age group, and body mass index category (Central region)**

| Departments      | Age group | Not- overweight<br>in 2005 | Overweight<br>in 2005 | Obese in<br>2005 | Not- overweight<br>in 2010 | Overweight<br>in 2010 | Obese in<br>2010 |
|------------------|-----------|----------------------------|-----------------------|------------------|----------------------------|-----------------------|------------------|
| Department<br>5  | 0-4       | 0.85294                    | 0.11765               | 0.02941          | 0.74101                    | 0.20863               | 0.05036          |
|                  | 5-9       | 0.85294                    | 0.11765               | 0.02941          | 0.68696                    | 0.20870               | 0.10435          |
|                  | 10-14     | 0.88235                    | 0.09804               | 0.01961          | 0.74747                    | 0.18434               | 0.06818          |
|                  | 15-19     | 0.88406                    | 0.11594               | 0.00000          | 0.82075                    | 0.13208               | 0.04717          |
|                  | 20-24     | 0.77778                    | 0.13889               | 0.08333          | 0.71802                    | 0.21149               | 0.07050          |
|                  | 25-29     | 0.61404                    | 0.33333               | 0.05263          | 0.57751                    | 0.33739               | 0.08511          |
|                  | 30-34     | 0.43902                    | 0.41463               | 0.14634          | 0.49505                    | 0.36634               | 0.13861          |
|                  | 35-39     | 0.46939                    | 0.42857               | 0.10204          | 0.36101                    | 0.47292               | 0.16606          |
|                  | 40-44     | 0.44000                    | 0.34000               | 0.22000          | 0.38438                    | 0.46875               | 0.14688          |
|                  | 45-49     | 0.46000                    | 0.42000               | 0.12000          | 0.38462                    | 0.43787               | 0.17751          |
|                  | 50-54     | 0.56522                    | 0.32609               | 0.10870          | 0.28435                    | 0.46326               | 0.25240          |
| 55-59            | 0.55556   | 0.25926                    | 0.18519               | 0.32877          | 0.40639                    | 0.26484               |                  |
| Department<br>17 | 0-4       | 0.76364                    | 0.05455               | 0.18182          | 0.78788                    | 0.18182               | 0.03030          |
|                  | 5-9       | 0.88889                    | 0.08333               | 0.02778          | 0.65068                    | 0.20548               | 0.14384          |
|                  | 10-14     | 0.82609                    | 0.15217               | 0.02174          | 0.74194                    | 0.22043               | 0.03763          |
|                  | 15-19     | 0.88060                    | 0.07463               | 0.04478          | 0.86364                    | 0.11111               | 0.02525          |
|                  | 20-24     | 0.77320                    | 0.16495               | 0.06186          | 0.73780                    | 0.24390               | 0.01829          |
|                  | 25-29     | 0.71667                    | 0.16667               | 0.11667          | 0.57937                    | 0.34127               | 0.07937          |
|                  | 30-34     | 0.61765                    | 0.27941               | 0.10294          | 0.43137                    | 0.38235               | 0.18627          |
|                  | 35-39     | 0.53012                    | 0.30120               | 0.16867          | 0.39695                    | 0.47328               | 0.12977          |
|                  | 40-44     | 0.43158                    | 0.46316               | 0.10526          | 0.44828                    | 0.33103               | 0.22069          |
|                  | 45-49     | 0.39048                    | 0.36190               | 0.24762          | 0.36691                    | 0.43885               | 0.19424          |
|                  | 50-54     | 0.29851                    | 0.56716               | 0.13433          | 0.32283                    | 0.44094               | 0.23622          |
| 55-59            | 0.31884   | 0.37681                    | 0.30435               | 0.34653          | 0.43564                    | 0.21782               |                  |
| Department<br>18 | 0-4       | 0.77778                    | 0.20000               | 0.02222          | 0.76471                    | 0.17647               | 0.05882          |
|                  | 5-9       | 0.77273                    | 0.18182               | 0.04545          | 0.73077                    | 0.07692               | 0.19231          |
|                  | 10-14     | 0.84000                    | 0.12000               | 0.04000          | 0.66667                    | 0.28571               | 0.04762          |
|                  | 15-19     | 0.74074                    | 0.22222               | 0.03704          | 0.82143                    | 0.10714               | 0.07143          |
|                  | 20-24     | 0.88000                    | 0.06000               | 0.06000          | 0.34783                    | 0.56522               | 0.08696          |
|                  | 25-29     | 0.70000                    | 0.23333               | 0.06667          | 0.54167                    | 0.33333               | 0.12500          |
|                  | 30-34     | 0.53125                    | 0.34375               | 0.12500          | 0.33333                    | 0.38889               | 0.27778          |
|                  | 35-39     | 0.20000                    | 0.48000               | 0.32000          | 0.23077                    | 0.53846               | 0.23077          |
|                  | 40-44     | 0.33333                    | 0.50000               | 0.16667          | 0.11111                    | 0.50000               | 0.38889          |
|                  | 45-49     | 0.53846                    | 0.30769               | 0.15385          | 0.20000                    | 0.20000               | 0.60000          |
|                  | 50-54     | 0.35000                    | 0.40000               | 0.25000          | 0.22222                    | 0.33333               | 0.44444          |
| 55-59            | 0.50000   | 0.35714                    | 0.14286               | 0.14286          | 0.21429                    | 0.64286               |                  |
| Department<br>41 | 0-4       | 0.70769                    | 0.20000               | 0.09231          | 0.81250                    | 0.15625               | 0.03125          |
|                  | 5-9       | 0.82609                    | 0.17391               | 0.00000          | 0.69369                    | 0.18018               | 0.12613          |
|                  | 10-14     | 0.88889                    | 0.11111               | 0.00000          | 0.67890                    | 0.20183               | 0.11927          |
|                  | 15-19     | 0.80769                    | 0.19231               | 0.00000          | 0.86400                    | 0.11200               | 0.02400          |
|                  | 20-24     | 0.68966                    | 0.20690               | 0.10345          | 0.70270                    | 0.20270               | 0.09459          |
|                  | 25-29     | 0.70370                    | 0.25926               | 0.03704          | 0.45000                    | 0.37500               | 0.17500          |
|                  | 30-34     | 0.53333                    | 0.43333               | 0.03333          | 0.44444                    | 0.37778               | 0.17778          |
|                  | 35-39     | 0.42105                    | 0.42105               | 0.15789          | 0.43836                    | 0.31507               | 0.24658          |
|                  | 40-44     | 0.52941                    | 0.17647               | 0.29412          | 0.26984                    | 0.38095               | 0.34921          |

| Departments      | Age group | Not- overweight<br>in 2005 | Overweight<br>in 2005 | Obese in<br>2005 | Not- overweight<br>in 2010 | Overweight<br>in 2010 | Obese in<br>2010 |
|------------------|-----------|----------------------------|-----------------------|------------------|----------------------------|-----------------------|------------------|
|                  | 45-49     | 0.29412                    | 0.58824               | 0.11765          | 0.17143                    | 0.54286               | 0.28571          |
|                  | 50-54     | 0.26667                    | 0.53333               | 0.20000          | 0.21429                    | 0.42857               | 0.35714          |
|                  | 55-59     | 0.45455                    | 0.27273               | 0.27273          | 0.25000                    | 0.47727               | 0.27273          |
| Department<br>63 | 0-4       | 0.92405                    | 0.05063               | 0.02532          | 0.72626                    | 0.22346               | 0.05028          |
|                  | 5-9       | 0.87879                    | 0.12121               | 0.00000          | 0.76442                    | 0.15385               | 0.08173          |
|                  | 10-14     | 0.96552                    | 0.03448               | 0.00000          | 0.75781                    | 0.18750               | 0.05469          |
|                  | 15-19     | 0.87500                    | 0.12500               | 0.00000          | 0.80351                    | 0.14737               | 0.04912          |
|                  | 20-24     | 0.89655                    | 0.10345               | 0.00000          | 0.74332                    | 0.19786               | 0.05882          |
|                  | 25-29     | 0.63158                    | 0.23684               | 0.13158          | 0.57436                    | 0.32308               | 0.10256          |
|                  | 30-34     | 0.59459                    | 0.35135               | 0.05405          | 0.52047                    | 0.37427               | 0.10526          |
|                  | 35-39     | 0.58974                    | 0.28205               | 0.12821          | 0.42384                    | 0.37086               | 0.20530          |
|                  | 40-44     | 0.43478                    | 0.26087               | 0.30435          | 0.38725                    | 0.38725               | 0.22549          |
|                  | 45-49     | 0.45000                    | 0.45000               | 0.10000          | 0.33333                    | 0.45699               | 0.20968          |
|                  | 50-54     | 0.54545                    | 0.36364               | 0.09091          | 0.30198                    | 0.41089               | 0.28713          |
|                  | 55-59     | 0.28571                    | 0.42857               | 0.28571          | 0.30220                    | 0.42857               | 0.26923          |
| Department<br>66 | 0-4       | 0.85294                    | 0.11765               | 0.02941          | 0.76000                    | 0.14667               | 0.09333          |
|                  | 5-9       | 0.85294                    | 0.11765               | 0.02941          | 0.70769                    | 0.16923               | 0.12308          |
|                  | 10-14     | 0.88235                    | 0.09804               | 0.01961          | 0.76389                    | 0.17593               | 0.06019          |
|                  | 15-19     | 0.88406                    | 0.11594               | 0.00000          | 0.84519                    | 0.12552               | 0.02929          |
|                  | 20-24     | 0.77778                    | 0.13889               | 0.08333          | 0.72527                    | 0.24176               | 0.03297          |
|                  | 25-29     | 0.61404                    | 0.33333               | 0.05263          | 0.54658                    | 0.34161               | 0.11180          |
|                  | 30-34     | 0.43902                    | 0.41463               | 0.14634          | 0.52500                    | 0.35000               | 0.12500          |
|                  | 35-39     | 0.46939                    | 0.42857               | 0.10204          | 0.43750                    | 0.38889               | 0.17361          |
|                  | 40-44     | 0.44000                    | 0.34000               | 0.22000          | 0.40394                    | 0.44335               | 0.15271          |
|                  | 45-49     | 0.46000                    | 0.42000               | 0.12000          | 0.32203                    | 0.47458               | 0.20339          |
|                  | 50-54     | 0.56522                    | 0.32609               | 0.10870          | 0.32500                    | 0.50000               | 0.17500          |
|                  | 55-59     | 0.55556                    | 0.25926               | 0.18519          | 0.30935                    | 0.43885               | 0.25180          |
| Department<br>73 | 0-4       | 0.70769                    | 0.20000               | 0.09231          | 0.64646                    | 0.25253               | 0.10101          |
|                  | 5-9       | 0.82609                    | 0.17391               | 0.00000          | 0.74603                    | 0.19841               | 0.05556          |
|                  | 10-14     | 0.88889                    | 0.11111               | 0.00000          | 0.75000                    | 0.19853               | 0.05147          |
|                  | 15-19     | 0.80769                    | 0.19231               | 0.00000          | 0.81967                    | 0.11475               | 0.06557          |
|                  | 20-24     | 0.68966                    | 0.20690               | 0.10345          | 0.66250                    | 0.23750               | 0.10000          |
|                  | 25-29     | 0.70370                    | 0.25926               | 0.03704          | 0.50588                    | 0.35294               | 0.14118          |
|                  | 30-34     | 0.53333                    | 0.43333               | 0.03333          | 0.32432                    | 0.36486               | 0.31081          |
|                  | 35-39     | 0.42105                    | 0.42105               | 0.15789          | 0.35849                    | 0.33962               | 0.30189          |
|                  | 40-44     | 0.52941                    | 0.17647               | 0.29412          | 0.32979                    | 0.53191               | 0.13830          |
|                  | 45-49     | 0.29412                    | 0.58824               | 0.11765          | 0.20000                    | 0.46316               | 0.33684          |
|                  | 50-54     | 0.26667                    | 0.53333               | 0.20000          | 0.17045                    | 0.44318               | 0.38636          |
|                  | 55-59     | 0.45455                    | 0.27273               | 0.27273          | 0.19718                    | 0.46479               | 0.33803          |

**Table 81. Mortality rates and population size by age group at the department level without segregate by socioeconomic status (Central region) †**

| Departments   | Age group | Mortality rates (R) (%/year) | Not-overweight population in 2005 (Number of people)1 | Overweight population in 2005 (Number of people)2 | Obese population in 2005 (Number of people)3 |
|---------------|-----------|------------------------------|-------------------------------------------------------|---------------------------------------------------|----------------------------------------------|
| Department 5  | 0-4       | 0.00274                      | 313033                                                | 41141                                             | 19676                                        |
|               | 5-9       | 0.00027                      | 330678                                                | 43461                                             | 20785                                        |
|               | 10-14     | 0.00029                      | 352571                                                | 47009                                             | 21697                                        |
|               | 15-19     | 0.00091                      | 359035                                                | 48147                                             | 6878                                         |
|               | 20-24     | 0.00172                      | 298127                                                | 62110                                             | 17200                                        |
|               | 25-29     | 0.00166                      | 237491                                                | 81966                                             | 23119                                        |
|               | 30-34     | 0.00160                      | 168734                                                | 101673                                            | 34612                                        |
|               | 35-39     | 0.00179                      | 152801                                                | 131113                                            | 43376                                        |
|               | 40-44     | 0.00203                      | 168341                                                | 111207                                            | 41830                                        |
|               | 45-49     | 0.00307                      | 118544                                                | 104800                                            | 46387                                        |
|               | 50-54     | 0.00449                      | 85783                                                 | 84899                                             | 42450                                        |
| 55-59         | 0.00687   | 65323                        | 64403                                                 | 33122                                             |                                              |
| Department 17 | 0-4       | 0.00272                      | 10355                                                 | 2190                                              | 1892                                         |
|               | 5-9       | 0.00040                      | 8204                                                  | 1026                                              | 128                                          |
|               | 10-14     | 0.00024                      | 5073                                                  | 1060                                              | 76                                           |
|               | 15-19     | 0.00143                      | 8998                                                  | 782                                               | 391                                          |
|               | 20-24     | 0.00266                      | 6387                                                  | 1249                                              | 432                                          |
|               | 25-29     | 0.00229                      | 7836                                                  | 1711                                              | 901                                          |
|               | 30-34     | 0.00277                      | 4181                                                  | 1921                                              | 621                                          |
|               | 35-39     | 0.00248                      | 3637                                                  | 2261                                              | 885                                          |
|               | 40-44     | 0.00277                      | 1027                                                  | 1264                                              | 296                                          |
|               | 45-49     | 0.00360                      | 2766                                                  | 2646                                              | 1203                                         |
|               | 50-54     | 0.00511                      | 1434                                                  | 2376                                              | 807                                          |
| 55-59         | 0.00835   | 2174                         | 2002                                                  | 1602                                              |                                              |
| Department 18 | 0-4       | 0.00441                      | 22523                                                 | 4774                                              | 612                                          |
|               | 5-9       | 0.00029                      | 22289                                                 | 3955                                              | 1079                                         |
|               | 10-14     | 0.00030                      | 22984                                                 | 2727                                              | 779                                          |
|               | 15-19     | 0.00125                      | 20161                                                 | 3688                                              | 983                                          |
|               | 20-24     | 0.00239                      | 16251                                                 | 2730                                              | 1950                                         |
|               | 25-29     | 0.00378                      | 12118                                                 | 4088                                              | 2044                                         |
|               | 30-34     | 0.00310                      | 7959                                                  | 4776                                              | 3051                                         |
|               | 35-39     | 0.00213                      | 5832                                                  | 5285                                              | 4374                                         |
|               | 40-44     | 0.00341                      | 5454                                                  | 4813                                              | 3208                                         |
|               | 45-49     | 0.00291                      | 3321                                                  | 3875                                              | 3459                                         |
|               | 50-54     | 0.00529                      | 1926                                                  | 3740                                              | 2833                                         |
| 55-59         | 0.00910   | 2170                         | 2170                                                  | 2034                                              |                                              |
| Department 41 | 0-4       | 0.00354                      | 18555                                                 | 2274                                              | 455                                          |
|               | 5-9       | 0.00027                      | 15103                                                 | 2568                                              | 604                                          |
|               | 10-14     | 0.00039                      | 12900                                                 | 1947                                              | 487                                          |
|               | 15-19     | 0.00111                      | 10406                                                 | 1076                                              | 215                                          |
|               | 20-24     | 0.00165                      | 6043                                                  | 1171                                              | 378                                          |
|               | 25-29     | 0.00183                      | 7270                                                  | 2491                                              | 1077                                         |
|               | 30-34     | 0.00200                      | 5049                                                  | 4081                                              | 1107                                         |
| 35-39         | 0.00232   | 4631                         | 3741                                                  | 1306                                              |                                              |



| Departments   | Age group | Mortality rates (R) (%/year) | Not-overweight population in 2005 (Number of people) <sup>1</sup> | Overweight population in 2005 (Number of people) <sup>2</sup> | Obese population in 2005 (Number of people) <sup>3</sup> |
|---------------|-----------|------------------------------|-------------------------------------------------------------------|---------------------------------------------------------------|----------------------------------------------------------|
|               | 40-44     | 0.00257                      | 2634                                                              | 2634                                                          | 1044                                                     |
|               | 45-49     | 0.00325                      | 1567                                                              | 2229                                                          | 906                                                      |
|               | 50-54     | 0.00462                      | 1450                                                              | 2248                                                          | 798                                                      |
|               | 55-59     | 0.00735                      | 577                                                               | 742                                                           | 350                                                      |
| Department 63 | 0-4       | 0.00254                      | 29774                                                             | 6749                                                          | 2382                                                     |
|               | 5-9       | 0.00026                      | 32091                                                             | 8306                                                          | 1888                                                     |
|               | 10-14     | 0.00020                      | 38770                                                             | 5816                                                          | 775                                                      |
|               | 15-19     | 0.00127                      | 37171                                                             | 2478                                                          | 1377                                                     |
|               | 20-24     | 0.00218                      | 29989                                                             | 5623                                                          | 1093                                                     |
|               | 25-29     | 0.00192                      | 22264                                                             | 9584                                                          | 2064                                                     |
|               | 30-34     | 0.00218                      | 18734                                                             | 10304                                                         | 2623                                                     |
|               | 35-39     | 0.00295                      | 17555                                                             | 12255                                                         | 4471                                                     |
|               | 40-44     | 0.00288                      | 17667                                                             | 9887                                                          | 6159                                                     |
|               | 45-49     | 0.00379                      | 12311                                                             | 12169                                                         | 5094                                                     |
|               | 50-54     | 0.00557                      | 9258                                                              | 10901                                                         | 4778                                                     |
|               | 55-59     | 0.00799                      | 5967                                                              | 9315                                                          | 4366                                                     |
| Department 66 | 0-4       | 0.00305                      | 43510                                                             | 10360                                                         | 3108                                                     |
|               | 5-9       | 0.00038                      | 52740                                                             | 6511                                                          | 3256                                                     |
|               | 10-14     | 0.00029                      | 54062                                                             | 9230                                                          | 3296                                                     |
|               | 15-19     | 0.00177                      | 55410                                                             | 6013                                                          | 1289                                                     |
|               | 20-24     | 0.00316                      | 46481                                                             | 9960                                                          | 3018                                                     |
|               | 25-29     | 0.00291                      | 36477                                                             | 14414                                                         | 3824                                                     |
|               | 30-34     | 0.00349                      | 25721                                                             | 15765                                                         | 6638                                                     |
|               | 35-39     | 0.00260                      | 27832                                                             | 16235                                                         | 6668                                                     |
|               | 40-44     | 0.00295                      | 19870                                                             | 22310                                                         | 7669                                                     |
|               | 45-49     | 0.00403                      | 16641                                                             | 16923                                                         | 10154                                                    |
|               | 50-54     | 0.00560                      | 12491                                                             | 12491                                                         | 11428                                                    |
|               | 55-59     | 0.00803                      | 8113                                                              | 12930                                                         | 6845                                                     |
| Department 73 | 0-4       | 0.00309                      | 56623                                                             | 20306                                                         | 7420                                                     |
|               | 5-9       | 0.00032                      | 70476                                                             | 14238                                                         | 4983                                                     |
|               | 10-14     | 0.00027                      | 71019                                                             | 14694                                                         | 7347                                                     |
|               | 15-19     | 0.00083                      | 68411                                                             | 16011                                                         | 2183                                                     |
|               | 20-24     | 0.00197                      | 47268                                                             | 15193                                                         | 5064                                                     |
|               | 25-29     | 0.00165                      | 35075                                                             | 21135                                                         | 6296                                                     |
|               | 30-34     | 0.00171                      | 28379                                                             | 23956                                                         | 6265                                                     |
|               | 35-39     | 0.00185                      | 25168                                                             | 25168                                                         | 11325                                                    |
|               | 40-44     | 0.00256                      | 21033                                                             | 28194                                                         | 12978                                                    |
|               | 45-49     | 0.00339                      | 12616                                                             | 24049                                                         | 16164                                                    |
|               | 50-54     | 0.00497                      | 11802                                                             | 19276                                                         | 12982                                                    |
|               | 55-59     | 0.00686                      | 8816                                                              | 15428                                                         | 11020                                                    |

<sup>†</sup>Values used in this table are for the urban population

<sup>1</sup> Initial value used in the stock of not-overweight population in 2005.

<sup>2</sup> Initial value used in the stock of overweight population in 2005.

<sup>3</sup> Initial value used in the stock of obese population in 2005.

**Table 82. Mortality rates and population size by age group at the department level for the lower socioeconomic status population (Central region) †**

| Departments   | Age group | Mortality rates (R) (%/year) | Not-overweight population in 2005 (Number of people)1 | Overweight population in 2005 (Number of people)2 | Obese population in 2005 (Number of people)3 |
|---------------|-----------|------------------------------|-------------------------------------------------------|---------------------------------------------------|----------------------------------------------|
| Department 5  | 0-4       | 0.00274                      | 51874                                                 | 7155                                              | 1789                                         |
|               | 5-9       | 0.00027                      | 54798                                                 | 7558                                              | 1890                                         |
|               | 10-14     | 0.00029                      | 81363                                                 | 9040                                              | 1808                                         |
|               | 15-19     | 0.00091                      | 82005                                                 | 10755                                             | 0                                            |
|               | 20-24     | 0.00172                      | 53510                                                 | 9555                                              | 5733                                         |
|               | 25-29     | 0.00166                      | 36780                                                 | 19966                                             | 3153                                         |
|               | 30-34     | 0.00160                      | 19469                                                 | 18388                                             | 6490                                         |
|               | 35-39     | 0.00179                      | 22674                                                 | 20702                                             | 4929                                         |
|               | 40-44     | 0.00203                      | 22445                                                 | 17344                                             | 11223                                        |
|               | 45-49     | 0.00307                      | 19757                                                 | 18039                                             | 5154                                         |
|               | 50-54     | 0.00449                      | 22993                                                 | 13265                                             | 4422                                         |
|               | 55-59     | 0.00687                      | 13801                                                 | 6440                                              | 4600                                         |
| Department 17 | 0-4       | 0.00272                      | 9878                                                  | 4179                                              | 380                                          |
|               | 5-9       | 0.00040                      | 8578                                                  | 780                                               | 0                                            |
|               | 10-14     | 0.00024                      | 4657                                                  | 1552                                              | 0                                            |
|               | 15-19     | 0.00143                      | 9536                                                  | 636                                               | 0                                            |
|               | 20-24     | 0.00266                      | 6131                                                  | 1613                                              | 323                                          |
|               | 25-29     | 0.00229                      | 8776                                                  | 1254                                              | 418                                          |
|               | 30-34     | 0.00277                      | 4109                                                  | 1868                                              | 747                                          |
|               | 35-39     | 0.00248                      | 4284                                                  | 1785                                              | 714                                          |
|               | 40-44     | 0.00277                      | 370                                                   | 1479                                              | 739                                          |
|               | 45-49     | 0.00360                      | 3705                                                  | 2646                                              | 265                                          |
|               | 50-54     | 0.00511                      | 2131                                                  | 1776                                              | 710                                          |
|               | 55-59     | 0.00835                      | 2167                                                  | 2167                                              | 1444                                         |
| Department 18 | 0-4       | 0.00441                      | 8569                                                  | 2203                                              | 245                                          |
|               | 5-9       | 0.00029                      | 6112                                                  | 1438                                              | 360                                          |
|               | 10-14     | 0.00030                      | 8181                                                  | 1169                                              | 390                                          |
|               | 15-19     | 0.00125                      | 4917                                                  | 1475                                              | 246                                          |
|               | 20-24     | 0.00239                      | 5720                                                  | 390                                               | 390                                          |
|               | 25-29     | 0.00378                      | 3066                                                  | 1022                                              | 292                                          |
|               | 30-34     | 0.00310                      | 2255                                                  | 1459                                              | 531                                          |
|               | 35-39     | 0.00213                      | 911                                                   | 2187                                              | 1458                                         |
|               | 40-44     | 0.00341                      | 963                                                   | 1444                                              | 481                                          |
|               | 45-49     | 0.00291                      | 969                                                   | 554                                               | 277                                          |
|               | 50-54     | 0.00529                      | 793                                                   | 907                                               | 567                                          |
|               | 55-59     | 0.00910                      | 949                                                   | 678                                               | 271                                          |
| Department 41 | 0-4       | 0.00354                      | 13426                                                 | 3794                                              | 1751                                         |
|               | 5-9       | 0.00027                      | 10104                                                 | 2127                                              | 0                                            |
|               | 10-14     | 0.00039                      | 9351                                                  | 1169                                              | 0                                            |
|               | 15-19     | 0.00111                      | 10515                                                 | 2504                                              | 0                                            |

| Departments   | Age group | Mortality rates (R) (%/year) | Not-overweight population in 2005 (Number of people)1 | Overweight population in 2005 (Number of people)2 | Obese population in 2005 (Number of people)3 |
|---------------|-----------|------------------------------|-------------------------------------------------------|---------------------------------------------------|----------------------------------------------|
|               | 20-24     | 0.00165                      | 6577                                                  | 1973                                              | 987                                          |
|               | 25-29     | 0.00183                      | 6277                                                  | 2312                                              | 330                                          |
|               | 30-34     | 0.00200                      | 4120                                                  | 3348                                              | 258                                          |
|               | 35-39     | 0.00232                      | 2201                                                  | 2201                                              | 826                                          |
|               | 40-44     | 0.00257                      | 2470                                                  | 823                                               | 1372                                         |
|               | 45-49     | 0.00325                      | 1184                                                  | 2369                                              | 474                                          |
|               | 50-54     | 0.00462                      | 905                                                   | 1810                                              | 679                                          |
|               | 55-59     | 0.00735                      | 1207                                                  | 724                                               | 724                                          |
| Department 63 | 0-4       | 0.00254                      | 12137                                                 | 665                                               | 333                                          |
|               | 5-9       | 0.00026                      | 10134                                                 | 1398                                              | 0                                            |
|               | 10-14     | 0.00020                      | 10080                                                 | 360                                               | 0                                            |
|               | 15-19     | 0.00127                      | 7047                                                  | 1007                                              | 0                                            |
|               | 20-24     | 0.00218                      | 4748                                                  | 548                                               | 0                                            |
|               | 25-29     | 0.00192                      | 5055                                                  | 1896                                              | 1053                                         |
|               | 30-34     | 0.00218                      | 4706                                                  | 2781                                              | 428                                          |
|               | 35-39     | 0.00295                      | 4837                                                  | 2313                                              | 1052                                         |
|               | 40-44     | 0.00288                      | 2425                                                  | 1455                                              | 1698                                         |
|               | 45-49     | 0.00379                      | 1972                                                  | 1972                                              | 438                                          |
| Department 66 | 50-54     | 0.00557                      | 2413                                                  | 1609                                              | 402                                          |
|               | 55-59     | 0.00799                      | 485                                                   | 728                                               | 485                                          |
|               | 0-4       | 0.00305                      | 17775                                                 | 974                                               | 487                                          |
|               | 5-9       | 0.00038                      | 14981                                                 | 2066                                              | 0                                            |
|               | 10-14     | 0.00029                      | 14797                                                 | 528                                               | 0                                            |
|               | 15-19     | 0.00177                      | 10773                                                 | 1539                                              | 0                                            |
|               | 20-24     | 0.00316                      | 7691                                                  | 887                                               | 0                                            |
|               | 25-29     | 0.00291                      | 8156                                                  | 3059                                              | 1699                                         |
|               | 30-34     | 0.00349                      | 7154                                                  | 4227                                              | 650                                          |
|               | 35-39     | 0.00260                      | 7159                                                  | 3424                                              | 1556                                         |
| Department 73 | 40-44     | 0.00295                      | 3586                                                  | 2152                                              | 2510                                         |
|               | 45-49     | 0.00403                      | 2915                                                  | 2915                                              | 648                                          |
|               | 50-54     | 0.00560                      | 3524                                                  | 2349                                              | 587                                          |
|               | 55-59     | 0.00803                      | 689                                                   | 1033                                              | 689                                          |
|               | 0-4       | 0.00309                      | 17963                                                 | 5077                                              | 2343                                         |
|               | 5-9       | 0.00032                      | 13526                                                 | 2848                                              | 0                                            |
|               | 10-14     | 0.00027                      | 13061                                                 | 1633                                              | 0                                            |
|               | 15-19     | 0.00083                      | 15283                                                 | 3639                                              | 0                                            |
|               | 20-24     | 0.00197                      | 8441                                                  | 2532                                              | 1266                                         |
|               | 25-29     | 0.00165                      | 8544                                                  | 3148                                              | 450                                          |
|               | 30-34     | 0.00171                      | 5897                                                  | 4791                                              | 369                                          |
|               | 35-39     | 0.00185                      | 3356                                                  | 3356                                              | 1258                                         |
|               | 40-44     | 0.00256                      | 4028                                                  | 1343                                              | 2238                                         |
|               | 45-49     | 0.00339                      | 1971                                                  | 3942                                              | 788                                          |
|               | 50-54     | 0.00497                      | 1574                                                  | 3147                                              | 1180                                         |

| Departments | Age group | Mortality rates (R) (%/year) | Not-overweight population in 2005 (Number of people) <sup>1</sup> | Overweight population in 2005 (Number of people) <sup>2</sup> | Obese population in 2005 (Number of people) <sup>3</sup> |
|-------------|-----------|------------------------------|-------------------------------------------------------------------|---------------------------------------------------------------|----------------------------------------------------------|
|             | 55-59     | 0.00686                      | 2204                                                              | 1322                                                          | 1322                                                     |

<sup>†</sup>Values used in this table are for the urban population

<sup>1</sup> Initial value used in the stock of not-overweight population in 2005 for lower SES.

<sup>2</sup> Initial value used in the stock of overweight population in 2005 for lower SES.

<sup>3</sup> Initial value used in the stock of obese population in 2005 for lower SES.

**Table 83. Mortality rates and population size by age group at the department level for the middle socioeconomic status population (Central region) <sup>†</sup>**

| Departments   | Age group | Mortality rates (R) (%/year) | Not-overweight population in 2005 (Number of people) <sup>1</sup> | Overweight population in 2005 (Number of people) <sup>2</sup> | Obese population in 2005 (Number of people) <sup>3</sup> |
|---------------|-----------|------------------------------|-------------------------------------------------------------------|---------------------------------------------------------------|----------------------------------------------------------|
| Department 5  | 0-4       | 0.00274                      | 70183                                                             | 9680                                                          | 2420                                                     |
|               | 5-9       | 0.00027                      | 74139                                                             | 10226                                                         | 2557                                                     |
|               | 10-14     | 0.00029                      | 90935                                                             | 10104                                                         | 2021                                                     |
|               | 15-19     | 0.00091                      | 79628                                                             | 10443                                                         | 0                                                        |
|               | 20-24     | 0.00172                      | 68374                                                             | 12210                                                         | 7326                                                     |
|               | 25-29     | 0.00166                      | 44523                                                             | 24169                                                         | 3816                                                     |
|               | 30-34     | 0.00160                      | 26592                                                             | 25115                                                         | 8864                                                     |
|               | 35-39     | 0.00179                      | 31928                                                             | 29152                                                         | 6941                                                     |
|               | 40-44     | 0.00203                      | 27832                                                             | 21507                                                         | 13916                                                    |
|               | 45-49     | 0.00307                      | 26870                                                             | 24533                                                         | 7010                                                     |
| Department 17 | 50-54     | 0.00449                      | 23993                                                             | 13842                                                         | 4614                                                     |
|               | 55-59     | 0.00687                      | 15334                                                             | 7156                                                          | 5111                                                     |
|               | 0-4       | 0.00272                      | 13677                                                             | 3039                                                          | 3039                                                     |
|               | 5-9       | 0.00040                      | 16377                                                             | 3119                                                          | 0                                                        |
|               | 10-14     | 0.00024                      | 17851                                                             | 3881                                                          | 0                                                        |
|               | 15-19     | 0.00143                      | 13987                                                             | 1272                                                          | 636                                                      |
|               | 20-24     | 0.00266                      | 12585                                                             | 1613                                                          | 645                                                      |
|               | 25-29     | 0.00229                      | 9612                                                              | 2507                                                          | 836                                                      |
|               | 30-34     | 0.00277                      | 7844                                                              | 3735                                                          | 747                                                      |
|               | 35-39     | 0.00248                      | 6426                                                              | 5712                                                          | 714                                                      |
| Department 18 | 40-44     | 0.00277                      | 3697                                                              | 5916                                                          | 1109                                                     |
|               | 45-49     | 0.00360                      | 3705                                                              | 4763                                                          | 794                                                      |
|               | 50-54     | 0.00511                      | 2131                                                              | 3552                                                          | 2486                                                     |
|               | 55-59     | 0.00835                      | 1376                                                              | 1376                                                          | 275                                                      |
|               | 0-4       | 0.00441                      | 7521                                                              | 1934                                                          | 215                                                      |
|               | 5-9       | 0.00029                      | 5834                                                              | 1373                                                          | 343                                                      |
|               | 10-14     | 0.00030                      | 8835                                                              | 1262                                                          | 421                                                      |
| Department 18 | 15-19     | 0.00125                      | 8014                                                              | 2404                                                          | 401                                                      |
|               | 20-24     | 0.00239                      | 6178                                                              | 421                                                           | 421                                                      |
|               | 25-29     | 0.00378                      | 4803                                                              | 1601                                                          | 457                                                      |
|               | 30-34     | 0.00310                      | 2537                                                              | 1642                                                          | 597                                                      |

| Departments   | Age group     | Mortality rates (R) (%/year) | Not-overweight population in 2005 (Number of people)1 | Overweight population in 2005 (Number of people)2 | Obese population in 2005 (Number of people)3 |
|---------------|---------------|------------------------------|-------------------------------------------------------|---------------------------------------------------|----------------------------------------------|
|               | 35-39         | 0.00213                      | 948                                                   | 2274                                              | 1516                                         |
|               | 40-44         | 0.00341                      | 1658                                                  | 2486                                              | 829                                          |
|               | 45-49         | 0.00291                      | 2757                                                  | 1575                                              | 788                                          |
|               | 50-54         | 0.00529                      | 833                                                   | 952                                               | 595                                          |
|               | 55-59         | 0.00910                      | 1424                                                  | 1017                                              | 407                                          |
| Department 41 | 0-4           | 0.00354                      | 17557                                                 | 4962                                              | 2290                                         |
|               | 5-9           | 0.00027                      | 25481                                                 | 5364                                              | 0                                            |
|               | 10-14         | 0.00039                      | 24935                                                 | 3117                                              | 0                                            |
|               | 15-19         | 0.00111                      | 14559                                                 | 3467                                              | 0                                            |
|               | 20-24         | 0.00165                      | 13608                                                 | 4082                                              | 2041                                         |
|               | 25-29         | 0.00183                      | 13948                                                 | 5139                                              | 734                                          |
|               | 30-34         | 0.00200                      | 8378                                                  | 6807                                              | 524                                          |
|               | 35-39         | 0.00232                      | 6025                                                  | 6025                                              | 2259                                         |
|               | 40-44         | 0.00257                      | 8136                                                  | 2712                                              | 4520                                         |
|               | 45-49         | 0.00325                      | 3274                                                  | 6548                                              | 1310                                         |
|               | 50-54         | 0.00462                      | 2474                                                  | 4948                                              | 1855                                         |
|               | 55-59         | 0.00735                      | 2853                                                  | 1712                                              | 1712                                         |
|               | Department 63 | 0-4                          | 0.00254                                               | 11522                                             | 631                                          |
| 5-9           |               | 0.00026                      | 11977                                                 | 1652                                              | 0                                            |
| 10-14         |               | 0.00020                      | 17727                                                 | 633                                               | 0                                            |
| 15-19         |               | 0.00127                      | 15196                                                 | 2171                                              | 0                                            |
| 20-24         |               | 0.00218                      | 12115                                                 | 1398                                              | 0                                            |
| 25-29         |               | 0.00192                      | 6918                                                  | 2594                                              | 1441                                         |
| 30-34         |               | 0.00218                      | 6105                                                  | 3608                                              | 555                                          |
| 35-39         |               | 0.00295                      | 7566                                                  | 3618                                              | 1645                                         |
| 40-44         |               | 0.00288                      | 4324                                                  | 2594                                              | 3027                                         |
| 45-49         |               | 0.00379                      | 4239                                                  | 4239                                              | 942                                          |
| 50-54         |               | 0.00557                      | 3291                                                  | 2194                                              | 548                                          |
| 55-59         |               | 0.00799                      | 1594                                                  | 2391                                              | 1594                                         |
| Department 66 |               | 0-4                          | 0.00305                                               | 15577                                             | 2148                                         |
|               | 5-9           | 0.00038                      | 17184                                                 | 2370                                              | 593                                          |
|               | 10-14         | 0.00029                      | 23781                                                 | 2642                                              | 528                                          |
|               | 15-19         | 0.00177                      | 23469                                                 | 3078                                              | 0                                            |
|               | 20-24         | 0.00316                      | 17026                                                 | 3040                                              | 1824                                         |
|               | 25-29         | 0.00291                      | 10851                                                 | 5891                                              | 930                                          |
|               | 30-34         | 0.00349                      | 6852                                                  | 6472                                              | 2284                                         |
|               | 35-39         | 0.00260                      | 8912                                                  | 8137                                              | 1937                                         |
|               | 40-44         | 0.00295                      | 6470                                                  | 4999                                              | 3235                                         |
|               | 45-49         | 0.00403                      | 6406                                                  | 5849                                              | 1671                                         |
|               | 50-54         | 0.00560                      | 4979                                                  | 2873                                              | 958                                          |
|               | 55-59         | 0.00803                      | 4399                                                  | 2053                                              | 1466                                         |
|               | Department 73 | 0-4                          | 0.00309                                               | 23490                                             | 6639                                         |
| 5-9           |               | 0.00032                      | 34108                                                 | 7181                                              | 0                                            |
| 10-14         |               | 0.00027                      | 34829                                                 | 4354                                              | 0                                            |

| Departments | Age group | Mortality rates (R) (%/year) | Not-overweight population in 2005 (Number of people) <sup>1</sup> | Overweight population in 2005 (Number of people) <sup>2</sup> | Obese population in 2005 (Number of people) <sup>3</sup> |
|-------------|-----------|------------------------------|-------------------------------------------------------------------|---------------------------------------------------------------|----------------------------------------------------------|
|             | 15-19     | 0.00083                      | 21162                                                             | 5038                                                          | 0                                                        |
|             | 20-24     | 0.00197                      | 17463                                                             | 5239                                                          | 2620                                                     |
|             | 25-29     | 0.00165                      | 18987                                                             | 6995                                                          | 999                                                      |
|             | 30-34     | 0.00171                      | 11990                                                             | 9742                                                          | 749                                                      |
|             | 35-39     | 0.00185                      | 9184                                                              | 9184                                                          | 3444                                                     |
|             | 40-44     | 0.00256                      | 13268                                                             | 4423                                                          | 7371                                                     |
|             | 45-49     | 0.00339                      | 5450                                                              | 10900                                                         | 2180                                                     |
|             | 50-54     | 0.00497                      | 4301                                                              | 8602                                                          | 3226                                                     |
|             | 55-59     | 0.00686                      | 5209                                                              | 3126                                                          | 3126                                                     |

†Values used in this table are for the urban population

<sup>1</sup> Initial value used in the stock of not-overweight population in 2005 for middle SES.

<sup>2</sup> Initial value used in the stock of overweight population in 2005 for middle SES.

<sup>3</sup> Initial value used in the stock of obese population in 2005 for middle SES.

**Table 84. Mortality rates and population size by age group at the department level for the higher socioeconomic status population (Central region) †**

| Departments   | Age group | Mortality rates (R) (%/year) | Not-overweight population in 2005 (Number of people) <sup>1</sup> | Overweight population in 2005 (Number of people) <sup>2</sup> | Obese population in 2005 (Number of people) <sup>3</sup> |
|---------------|-----------|------------------------------|-------------------------------------------------------------------|---------------------------------------------------------------|----------------------------------------------------------|
| Department 5  | 0-4       | 0.00274                      | 196816                                                            | 27147                                                         | 6787                                                     |
|               | 5-9       | 0.00027                      | 207910                                                            | 28677                                                         | 7169                                                     |
|               | 10-14     | 0.00029                      | 199418                                                            | 22158                                                         | 4432                                                     |
|               | 15-19     | 0.00091                      | 204419                                                            | 26809                                                         | 0                                                        |
|               | 20-24     | 0.00172                      | 171678                                                            | 30657                                                         | 18394                                                    |
|               | 25-29     | 0.00166                      | 129051                                                            | 70056                                                         | 11062                                                    |
|               | 30-34     | 0.00160                      | 87850                                                             | 82969                                                         | 29283                                                    |
|               | 35-39     | 0.00179                      | 99024                                                             | 90413                                                         | 21527                                                    |
|               | 40-44     | 0.00203                      | 91129                                                             | 70417                                                         | 45564                                                    |
|               | 45-49     | 0.00307                      | 77449                                                             | 70714                                                         | 20204                                                    |
| Department 17 | 0-4       | 0.00272                      | 15957                                                             | 1140                                                          | 3799                                                     |
|               | 5-9       | 0.00040                      | 24955                                                             | 2340                                                          | 780                                                      |
|               | 10-14     | 0.00024                      | 29493                                                             | 5433                                                          | 776                                                      |
|               | 15-19     | 0.00143                      | 37510                                                             | 3179                                                          | 1907                                                     |
|               | 20-24     | 0.00266                      | 24202                                                             | 5163                                                          | 1936                                                     |
|               | 25-29     | 0.00229                      | 17970                                                             | 4179                                                          | 2925                                                     |
|               | 30-34     | 0.00277                      | 15688                                                             | 7097                                                          | 2615                                                     |
|               | 35-39     | 0.00248                      | 15708                                                             | 8925                                                          | 4998                                                     |
|               | 40-44     | 0.00277                      | 15160                                                             | 16269                                                         | 3697                                                     |
|               | 45-49     | 0.00360                      | 10849                                                             | 10055                                                         | 6880                                                     |
|               | 50-54     | 0.00511                      | 7103                                                              | 13497                                                         | 3197                                                     |
|               | 55-59     | 0.00835                      | 6053                                                              | 7153                                                          | 5778                                                     |

| Departments   | Age group | Mortality rates (R) (%/year) | Not-overweight population in 2005 (Number of people)1 | Overweight population in 2005 (Number of people)2 | Obese population in 2005 (Number of people)3 |
|---------------|-----------|------------------------------|-------------------------------------------------------|---------------------------------------------------|----------------------------------------------|
| Department 18 | 0-4       | 0.00441                      | 5617                                                  | 1444                                              | 160                                          |
|               | 5-9       | 0.00029                      | 9167                                                  | 2157                                              | 539                                          |
|               | 10-14     | 0.00030                      | 5236                                                  | 748                                               | 249                                          |
|               | 15-19     | 0.00125                      | 5464                                                  | 1639                                              | 273                                          |
|               | 20-24     | 0.00239                      | 6521                                                  | 445                                               | 445                                          |
|               | 25-29     | 0.00378                      | 4906                                                  | 1635                                              | 467                                          |
|               | 30-34     | 0.00310                      | 3594                                                  | 2326                                              | 846                                          |
|               | 35-39     | 0.00213                      | 1239                                                  | 2974                                              | 1983                                         |
|               | 40-44     | 0.00341                      | 1872                                                  | 2807                                              | 936                                          |
|               | 45-49     | 0.00291                      | 2012                                                  | 1150                                              | 575                                          |
|               | 50-54     | 0.00529                      | 1349                                                  | 1541                                              | 963                                          |
| 55-59         | 0.00910   | 814                          | 581                                                   | 232                                               |                                              |
| Department 41 | 0-4       | 0.00354                      | 13633                                                 | 3853                                              | 1778                                         |
|               | 5-9       | 0.00027                      | 19769                                                 | 4162                                              | 0                                            |
|               | 10-14     | 0.00039                      | 24935                                                 | 3117                                              | 0                                            |
|               | 15-19     | 0.00111                      | 23053                                                 | 5489                                              | 0                                            |
|               | 20-24     | 0.00165                      | 16103                                                 | 4831                                              | 2415                                         |
|               | 25-29     | 0.00183                      | 12088                                                 | 4454                                              | 636                                          |
|               | 30-34     | 0.00200                      | 9340                                                  | 7589                                              | 584                                          |
|               | 35-39     | 0.00232                      | 8805                                                  | 8805                                              | 3302                                         |
|               | 40-44     | 0.00257                      | 9588                                                  | 3196                                              | 5327                                         |
|               | 45-49     | 0.00325                      | 4876                                                  | 9753                                              | 1951                                         |
|               | 50-54     | 0.00462                      | 3379                                                  | 6758                                              | 2534                                         |
| 55-59         | 0.00735   | 4718                         | 2831                                                  | 2831                                              |                                              |
| Department 63 | 0-4       | 0.00254                      | 12291                                                 | 673                                               | 337                                          |
|               | 5-9       | 0.00026                      | 15048                                                 | 2076                                              | 0                                            |
|               | 10-14     | 0.00020                      | 15989                                                 | 571                                               | 0                                            |
|               | 15-19     | 0.00127                      | 13654                                                 | 1951                                              | 0                                            |
|               | 20-24     | 0.00218                      | 16045                                                 | 1851                                              | 0                                            |
|               | 25-29     | 0.00192                      | 9445                                                  | 3542                                              | 1968                                         |
|               | 30-34     | 0.00218                      | 8013                                                  | 4735                                              | 728                                          |
|               | 35-39     | 0.00295                      | 7814                                                  | 3737                                              | 1699                                         |
|               | 40-44     | 0.00288                      | 7909                                                  | 4745                                              | 5536                                         |
|               | 45-49     | 0.00379                      | 7098                                                  | 7098                                              | 1577                                         |
|               | 50-54     | 0.00557                      | 7898                                                  | 5265                                              | 1316                                         |
| 55-59         | 0.00799   | 3535                         | 5302                                                  | 3535                                              |                                              |
| Department 66 | 0-4       | 0.00305                      | 16615                                                 | 2292                                              | 573                                          |
|               | 5-9       | 0.00038                      | 21590                                                 | 2978                                              | 744                                          |
|               | 10-14     | 0.00029                      | 21450                                                 | 2383                                              | 477                                          |
|               | 15-19     | 0.00177                      | 21088                                                 | 2766                                              | 0                                            |
|               | 20-24     | 0.00316                      | 22548                                                 | 4026                                              | 2416                                         |
|               | 25-29     | 0.00291                      | 14816                                                 | 8043                                              | 1270                                         |
|               | 30-34     | 0.00349                      | 8994                                                  | 8494                                              | 2998                                         |
| 35-39         | 0.00260   | 9204                         | 8404                                                  | 2001                                              |                                              |

| Departments   | Age group | Mortality rates (R) (%/year) | Not-overweight population in 2005 (Number of people) <sup>1</sup> | Overweight population in 2005 (Number of people) <sup>2</sup> | Obese population in 2005 (Number of people) <sup>3</sup> |
|---------------|-----------|------------------------------|-------------------------------------------------------------------|---------------------------------------------------------------|----------------------------------------------------------|
|               | 40-44     | 0.00295                      | 11835                                                             | 9145                                                          | 5917                                                     |
|               | 45-49     | 0.00403                      | 10726                                                             | 9793                                                          | 2798                                                     |
|               | 50-54     | 0.00560                      | 11950                                                             | 6894                                                          | 2298                                                     |
|               | 55-59     | 0.00803                      | 9755                                                              | 4553                                                          | 3252                                                     |
| Department 73 | 0-4       | 0.00309                      | 18239                                                             | 5155                                                          | 2379                                                     |
|               | 5-9       | 0.00032                      | 26463                                                             | 5571                                                          | 0                                                        |
|               | 10-14     | 0.00027                      | 34829                                                             | 4354                                                          | 0                                                        |
|               | 15-19     | 0.00083                      | 33506                                                             | 7978                                                          | 0                                                        |
|               | 20-24     | 0.00197                      | 20665                                                             | 6199                                                          | 3100                                                     |
|               | 25-29     | 0.00165                      | 16455                                                             | 6062                                                          | 866                                                      |
|               | 30-34     | 0.00171                      | 13366                                                             | 10860                                                         | 835                                                      |
|               | 35-39     | 0.00185                      | 13423                                                             | 13423                                                         | 5034                                                     |
|               | 40-44     | 0.00256                      | 15637                                                             | 5212                                                          | 8687                                                     |
|               | 45-49     | 0.00339                      | 8117                                                              | 16233                                                         | 3247                                                     |
|               | 50-54     | 0.00497                      | 5875                                                              | 11749                                                         | 4406                                                     |
|               | 55-59     | 0.00686                      | 8616                                                              | 5169                                                          | 5169                                                     |

†Values used in this table are for the urban population

<sup>1</sup> Initial value used in the stock of not-overweight population in 2005 for higher SES.

<sup>2</sup> Initial value used in the stock of overweight population in 2005 for higher SES.

<sup>3</sup> Initial value used in the stock of obese population in 2005 for higher SES.

## 1.4 Pacifica Region

The Pacifica region of Colombia is located in the eastern part of the national territory and consists of four departments, these are:

- Cauca (19)
- Chocó (27)
- Nariño (52)
- Valle Del Cauca (76)

### 1.4.1 Data and model parameters used

**Table 85. Prevalent rates of entire population by age group, sex, and body mass index category in 2005 (Pacifica region)**

| Age Group | Nutritional State Male |           |         | Nutritional State Female |           |         |
|-----------|------------------------|-----------|---------|--------------------------|-----------|---------|
|           | Not-Overweigh          | Overweigh | Obese   | Not-Overweigh            | Overweigh | Obese   |
| 0-4       | 0.78558                | 0.15595   | 0.05848 | 0.75569                  | 0.19048   | 0.05383 |
| 5-9       | 0.81818                | 0.13439   | 0.04743 | 0.80658                  | 0.13169   | 0.06173 |
| 10-14     | 0.83539                | 0.12757   | 0.03704 | 0.82474                  | 0.12027   | 0.05498 |
| 15-19     | 0.89286                | 0.08631   | 0.02083 | 0.78109                  | 0.19154   | 0.02736 |
| 20-24     | 0.79104                | 0.16667   | 0.04229 | 0.76214                  | 0.19741   | 0.04045 |
| 25-29     | 0.62500                | 0.28889   | 0.08611 | 0.59848                  | 0.28598   | 0.11553 |
| 30-34     | 0.53618                | 0.34539   | 0.11842 | 0.49791                  | 0.33682   | 0.16527 |



|       |         |         |         |         |         |         |
|-------|---------|---------|---------|---------|---------|---------|
| 35-39 | 0.48454 | 0.38144 | 0.13402 | 0.42443 | 0.39130 | 0.18427 |
| 40-44 | 0.41852 | 0.43333 | 0.14815 | 0.33781 | 0.41611 | 0.24609 |
| 45-49 | 0.37500 | 0.47321 | 0.15179 | 0.25373 | 0.41791 | 0.32836 |
| 50-54 | 0.44206 | 0.42489 | 0.13305 | 0.27072 | 0.39227 | 0.33702 |
| 55-59 | 0.38194 | 0.47222 | 0.14583 | 0.23551 | 0.36957 | 0.39493 |

**Table 86. Prevalent rates of lower socioeconomic status population by age group, sex, and body mass index category in 2005 (Pacifica region)**

| Age Group | Nutritional State -Male |           |         | Nutritional State -Female |           |         |
|-----------|-------------------------|-----------|---------|---------------------------|-----------|---------|
|           | Not-Overweigh           | Overweigh | Obese   | Not-Overweigh             | Overweigh | Obese   |
| 0-4       | 0.80588                 | 0.13529   | 0.05882 | 0.80952                   | 0.13690   | 0.05357 |
| 5-9       | 0.87324                 | 0.11268   | 0.01408 | 0.90476                   | 0.06349   | 0.03175 |
| 10-14     | 0.91398                 | 0.06452   | 0.02151 | 0.87013                   | 0.12987   | 0.00000 |
| 15-19     | 1.00000                 | 0.00000   | 0.00000 | 0.74528                   | 0.21698   | 0.03774 |
| 20-24     | 0.86325                 | 0.11111   | 0.02564 | 0.73759                   | 0.20567   | 0.05674 |
| 25-29     | 0.76923                 | 0.15385   | 0.07692 | 0.53906                   | 0.31250   | 0.14844 |
| 30-34     | 0.69444                 | 0.19444   | 0.11111 | 0.49091                   | 0.34545   | 0.16364 |
| 35-39     | 0.68056                 | 0.26389   | 0.05556 | 0.44915                   | 0.35593   | 0.19492 |
| 40-44     | 0.56061                 | 0.33333   | 0.10606 | 0.38043                   | 0.36957   | 0.25000 |
| 45-49     | 0.63636                 | 0.25455   | 0.10909 | 0.22500                   | 0.46250   | 0.31250 |
| 50-54     | 0.76087                 | 0.15217   | 0.08696 | 0.27941                   | 0.41176   | 0.30882 |
| 55-59     | 0.64706                 | 0.26471   | 0.08824 | 0.21739                   | 0.43478   | 0.34783 |

**Table 87. Prevalent rates of middle socioeconomic status population by age group, sex, and body mass index category in 2005 (Pacifica region)**

| Age Group | Nutritional State Male |           |         | Nutritional State Female |           |         |
|-----------|------------------------|-----------|---------|--------------------------|-----------|---------|
|           | Not-Overweigh          | Overweigh | Obese   | Not-Overweigh            | Overweigh | Obese   |
| 0-4       | 0.77273                | 0.15152   | 0.07576 | 0.73973                  | 0.22603   | 0.03425 |
| 5-9       | 0.87013                | 0.11688   | 0.01299 | 0.85915                  | 0.11268   | 0.02817 |
| 10-14     | 0.80328                | 0.14754   | 0.04918 | 0.77477                  | 0.13514   | 0.09009 |
| 15-19     | 0.90000                | 0.07778   | 0.02222 | 0.84112                  | 0.14019   | 0.01869 |
| 20-24     | 0.74528                | 0.20755   | 0.04717 | 0.74118                  | 0.21765   | 0.04118 |
| 25-29     | 0.62281                | 0.28070   | 0.09649 | 0.58710                  | 0.30968   | 0.10323 |
| 30-34     | 0.52577                | 0.38144   | 0.09278 | 0.45522                  | 0.35821   | 0.18657 |
| 35-39     | 0.52874                | 0.36782   | 0.10345 | 0.40909                  | 0.32727   | 0.26364 |
| 40-44     | 0.53125                | 0.37500   | 0.09375 | 0.28682                  | 0.39535   | 0.31783 |
| 45-49     | 0.42857                | 0.44643   | 0.12500 | 0.24444                  | 0.36667   | 0.38889 |
| 50-54     | 0.43333                | 0.46667   | 0.10000 | 0.26667                  | 0.41333   | 0.32000 |
| 55-59     | 0.22581                | 0.54839   | 0.22581 | 0.21918                  | 0.31507   | 0.46575 |

**Table 88. Prevalent rates of higher socioeconomic status population by age group, sex, and body mass index category in 2005 (Pacifica region)**

| Age Group | Nutritional State Male |           |         | Nutritional State Female |           |         |
|-----------|------------------------|-----------|---------|--------------------------|-----------|---------|
|           | Not-Overweigh          | Overweigh | Obese   | Not-Overweigh            | Overweigh | Obese   |
| 0-4       | 0.77725                | 0.17536   | 0.04739 | 0.71598                  | 0.21302   | 0.07101 |
| 5-9       | 0.74286                | 0.16190   | 0.09524 | 0.71560                  | 0.18349   | 0.10092 |
| 10-14     | 0.77528                | 0.17978   | 0.04494 | 0.84466                  | 0.09709   | 0.05825 |
| 15-19     | 0.81379                | 0.15172   | 0.03448 | 0.76720                  | 0.20635   | 0.02646 |

|       |         |         |         |         |         |         |
|-------|---------|---------|---------|---------|---------|---------|
| 20-24 | 0.77095 | 0.17877 | 0.05028 | 0.78502 | 0.18241 | 0.03257 |
| 25-29 | 0.55952 | 0.35714 | 0.08333 | 0.63673 | 0.25714 | 0.10612 |
| 30-34 | 0.45926 | 0.40000 | 0.14074 | 0.52564 | 0.32051 | 0.15385 |
| 35-39 | 0.34848 | 0.45455 | 0.19697 | 0.41961 | 0.43529 | 0.14510 |
| 40-44 | 0.30000 | 0.50714 | 0.19286 | 0.34956 | 0.44690 | 0.20354 |
| 45-49 | 0.22124 | 0.59292 | 0.18584 | 0.26724 | 0.42241 | 0.31034 |
| 50-54 | 0.33071 | 0.50394 | 0.16535 | 0.26941 | 0.37900 | 0.35160 |
| 55-59 | 0.32911 | 0.53165 | 0.13924 | 0.24841 | 0.37580 | 0.37580 |

**Table 89. Prevalent rates of entire population by age group, sex, and body mass index category in 2010 (Pacifica region)**

| Age Group | Nutritional State Male |           |         | Nutritional State Female |           |         |
|-----------|------------------------|-----------|---------|--------------------------|-----------|---------|
|           | Not-Overweigh          | Overweigh | Obese   | Not-Overweigh            | Overweigh | Obese   |
| 0-4       | 0.72851                | 0.19236   | 0.07913 | 0.75176                  | 0.19887   | 0.04937 |
| 5-9       | 0.75553                | 0.15848   | 0.08600 | 0.76800                  | 0.16667   | 0.06533 |
| 10-14     | 0.73949                | 0.17407   | 0.08645 | 0.76089                  | 0.18883   | 0.05028 |
| 15-19     | 0.82404                | 0.14746   | 0.02850 | 0.77235                  | 0.17759   | 0.05006 |
| 20-24     | 0.73607                | 0.20000   | 0.06393 | 0.69525                  | 0.22164   | 0.08311 |
| 25-29     | 0.56920                | 0.33723   | 0.09357 | 0.55601                  | 0.30055   | 0.14344 |
| 30-34     | 0.46764                | 0.40501   | 0.12735 | 0.40194                  | 0.40357   | 0.19449 |
| 35-39     | 0.40000                | 0.41772   | 0.18228 | 0.36799                  | 0.37789   | 0.25413 |
| 40-44     | 0.35648                | 0.48148   | 0.16204 | 0.34231                  | 0.41204   | 0.24564 |
| 45-49     | 0.42746                | 0.40933   | 0.16321 | 0.26847                  | 0.39099   | 0.34054 |
| 50-54     | 0.42089                | 0.41139   | 0.16772 | 0.23314                  | 0.38728   | 0.37958 |
| 55-59     | 0.39416                | 0.43796   | 0.16788 | 0.19471                  | 0.42067   | 0.38462 |

**Table 90. Prevalent rates of lower socioeconomic status population by age group, sex, and body mass index category in 2010 (Pacifica region)**

| Age Group | Nutritional State -Male |           |         | Nutritional State -Female |           |         |
|-----------|-------------------------|-----------|---------|---------------------------|-----------|---------|
|           | Not-Overweigh           | Overweigh | Obese   | Not-Overweigh             | Overweigh | Obese   |
| 0-4       | 0.73129                 | 0.22109   | 0.04762 | 0.74747                   | 0.21212   | 0.04040 |
| 5-9       | 0.84112                 | 0.12773   | 0.03115 | 0.82540                   | 0.13016   | 0.04444 |
| 10-14     | 0.79667                 | 0.15000   | 0.05333 | 0.79751                   | 0.15888   | 0.04361 |
| 15-19     | 0.86643                 | 0.11913   | 0.01444 | 0.73958                   | 0.20833   | 0.05208 |
| 20-24     | 0.79439                 | 0.15888   | 0.04673 | 0.64015                   | 0.25379   | 0.10606 |
| 25-29     | 0.61333                 | 0.33333   | 0.05333 | 0.46479                   | 0.31925   | 0.21596 |
| 30-34     | 0.45455                 | 0.40496   | 0.14050 | 0.32927                   | 0.42683   | 0.24390 |
| 35-39     | 0.47009                 | 0.33333   | 0.19658 | 0.33333                   | 0.35948   | 0.30719 |
| 40-44     | 0.48246                 | 0.42982   | 0.08772 | 0.32000                   | 0.38667   | 0.29333 |
| 45-49     | 0.55056                 | 0.30337   | 0.14607 | 0.19697                   | 0.38636   | 0.41667 |
| 50-54     | 0.53409                 | 0.35227   | 0.11364 | 0.30435                   | 0.34783   | 0.34783 |
| 55-59     | 0.47458                 | 0.40678   | 0.11864 | 0.25000                   | 0.37500   | 0.37500 |

**Table 91. Prevalent rates of middle socioeconomic status population by age group, sex, and body mass index category in 2010 (Pacifica region)**

| Age Group | Nutritional State Male | Nutritional State Female |
|-----------|------------------------|--------------------------|
|-----------|------------------------|--------------------------|

|              | Not-Overweigh | Overweigh | Obese   | Not-Overweigh | Overweigh | Obese   |
|--------------|---------------|-----------|---------|---------------|-----------|---------|
| <b>0-4</b>   | 0.71226       | 0.18396   | 0.10377 | 0.73711       | 0.22165   | 0.04124 |
| <b>5-9</b>   | 0.75983       | 0.17467   | 0.06550 | 0.76923       | 0.14872   | 0.08205 |
| <b>10-14</b> | 0.75000       | 0.17672   | 0.07328 | 0.75099       | 0.20158   | 0.04743 |
| <b>15-19</b> | 0.82328       | 0.15948   | 0.01724 | 0.78802       | 0.17512   | 0.03687 |
| <b>20-24</b> | 0.72185       | 0.21854   | 0.05960 | 0.70918       | 0.21939   | 0.07143 |
| <b>25-29</b> | 0.52083       | 0.34028   | 0.13889 | 0.53913       | 0.33043   | 0.13043 |
| <b>30-34</b> | 0.52448       | 0.36364   | 0.11189 | 0.41361       | 0.38743   | 0.19895 |
| <b>35-39</b> | 0.37615       | 0.49541   | 0.12844 | 0.32065       | 0.39674   | 0.28261 |
| <b>40-44</b> | 0.37398       | 0.44715   | 0.17886 | 0.38217       | 0.36943   | 0.24841 |
| <b>45-49</b> | 0.40187       | 0.46729   | 0.13084 | 0.24060       | 0.40602   | 0.35338 |
| <b>50-54</b> | 0.45588       | 0.35294   | 0.19118 | 0.19708       | 0.32847   | 0.47445 |
| <b>55-59</b> | 0.45833       | 0.36111   | 0.18056 | 0.16129       | 0.43011   | 0.40860 |

**Table 92. Prevalent rates of higher socioeconomic status population by age group, sex, and body mass index category in 2010 (Pacifica region)**

| Age Group    | Nutritional State Male |           |         | Nutritional State Female |           |         |
|--------------|------------------------|-----------|---------|--------------------------|-----------|---------|
|              | Not-Overweigh          | Overweigh | Obese   | Not-Overweigh            | Overweigh | Obese   |
| <b>0-4</b>   | 0.65882                | 0.16300   | 0.09692 | 0.77064                  | 0.16055   | 0.06881 |
| <b>5-9</b>   | 0.66537                | 0.18182   | 0.17045 | 0.69167                  | 0.22917   | 0.07917 |
| <b>10-14</b> | 0.71895                | 0.19444   | 0.12654 | 0.73209                  | 0.20872   | 0.05919 |
| <b>15-19</b> | 0.82979                | 0.16443   | 0.05034 | 0.79042                  | 0.15269   | 0.05689 |
| <b>20-24</b> | 0.75893                | 0.22449   | 0.08163 | 0.73490                  | 0.19463   | 0.07047 |
| <b>25-29</b> | 0.64103                | 0.33790   | 0.09132 | 0.63668                  | 0.26298   | 0.10035 |
| <b>30-34</b> | 0.54971                | 0.43256   | 0.13023 | 0.43893                  | 0.40076   | 0.16031 |
| <b>35-39</b> | 0.45588                | 0.42604   | 0.20710 | 0.42007                  | 0.37546   | 0.20446 |
| <b>40-44</b> | 0.37857                | 0.53333   | 0.19487 | 0.33333                  | 0.44444   | 0.22222 |
| <b>45-49</b> | 0.53676                | 0.42632   | 0.18947 | 0.31379                  | 0.38621   | 0.30000 |
| <b>50-54</b> | 0.47414                | 0.46875   | 0.18750 | 0.22097                  | 0.43446   | 0.34457 |
| <b>55-59</b> | 0.48454                | 0.48951   | 0.18182 | 0.18723                  | 0.43404   | 0.37872 |

**Table 93. Fraction of births for men by body mass index category, and socioeconomic status (Pacifica region) †**

| Population group       | Lower SES (%/year) | Middle SES (%/year) | Higher SES (%/year) | Complete Urban Population (%/year) |
|------------------------|--------------------|---------------------|---------------------|------------------------------------|
| <b>Not- overweight</b> | 72,41%             | 85,19%              | 76,09%              | 77,45%                             |
| <b>Overweight</b>      | 17,24%             | 7,41%               | 19,57%              | 15,69%                             |
| <b>Obese</b>           | 10,34%             | 7,41%               | 4,35%               | 6,86%                              |

† The fractions of births by each BMI category correspond to the prevalences by BMI category of children aged 0 to 12 months

**Table 94. Fraction of births for women by body mass index category and socioeconomic status (Pacifica region) †**

| Population group       | Lower SES (%/year) | Middle SES (%/year) | Higher SES (%/year) | Complete Urban Population (%/year) |
|------------------------|--------------------|---------------------|---------------------|------------------------------------|
| <b>Not- overweight</b> | 84,09%             | 75,00%              | 72,41%              | 78,10%                             |
| <b>Overweight</b>      | 11,36%             | 25,00%              | 27,59%              | 20,00%                             |
| <b>Obese</b>           | 4,55%              | 0,00%               | 0,00%               | 1,90%                              |

† The fractions of births by each BMI category correspond to the prevalences by BMI category of children aged

0 to 12 months

**Table 95. Mortality rates for men and population size by age group without segregate by socioeconomic status (Pacifica region) †**

| Age group | Mortality rates (R) (%/year) Male | Not- overweight men in 2005 (Number of people) <sup>1</sup> | Overweight men in 2005 (Number of people) <sup>2</sup> | Obese men in 2005 (Number of people) <sup>3</sup> |
|-----------|-----------------------------------|-------------------------------------------------------------|--------------------------------------------------------|---------------------------------------------------|
| 0-4       | 0.00307                           | 184596                                                      | 36644                                                  | 13742                                             |
| 5-9       | 0.00033                           | 203636                                                      | 33447                                                  | 11805                                             |
| 10-14     | 0.00038                           | 218566                                                      | 33377                                                  | 9690                                              |
| 15-19     | 0.00275                           | 226037                                                      | 21850                                                  | 5274                                              |
| 20-24     | 0.00451                           | 176846                                                      | 37260                                                  | 9454                                              |
| 25-29     | 0.00478                           | 123731                                                      | 57191                                                  | 17047                                             |
| 30-34     | 0.00447                           | 93277                                                       | 60086                                                  | 20601                                             |
| 35-39     | 0.00378                           | 84070                                                       | 66183                                                  | 23254                                             |
| 40-44     | 0.00398                           | 68393                                                       | 70814                                                  | 24210                                             |
| 45-49     | 0.00447                           | 51185                                                       | 64590                                                  | 20718                                             |
| 50-54     | 0.00621                           | 48842                                                       | 46945                                                  | 14700                                             |
| 55-59     | 0.00823                           | 32748                                                       | 40488                                                  | 12504                                             |

†Values used in this table are for the urban population

<sup>1</sup> Initial value used in the stock of not-overweight population in 2005.<sup>2</sup> Initial value used in the stock of overweight population in 2005.<sup>3</sup> Initial value used in the stock of obese population in 2005.**Table 96. Mortality rates for women and population size by age group without segregate by socioeconomic status (Pacifica region) †**

| Age group | Mortality rates (R) (%/year) | Not- overweight women in 2005 (Number of people) <sup>1</sup> | Overweight women in 2005 (Number of people) <sup>2</sup> | Obese women in 2005 (Number of people) <sup>3</sup> |
|-----------|------------------------------|---------------------------------------------------------------|----------------------------------------------------------|-----------------------------------------------------|
| 0-4       | 0,00252                      | 171187                                                        | 43149                                                    | 12194                                               |
| 5-9       | 0,00019                      | 194155                                                        | 31699                                                    | 14859                                               |
| 10-14     | 0,00028                      | 209050                                                        | 30486                                                    | 13937                                               |
| 15-19     | 0,00059                      | 198205                                                        | 48604                                                    | 6943                                                |
| 20-24     | 0,00085                      | 181109                                                        | 46912                                                    | 9613                                                |
| 25-29     | 0,00095                      | 129444                                                        | 61855                                                    | 24988                                               |
| 30-34     | 0,00101                      | 97854                                                         | 66196                                                    | 32481                                               |
| 35-39     | 0,00132                      | 86582                                                         | 79824                                                    | 37589                                               |
| 40-44     | 0,00157                      | 65676                                                         | 80899                                                    | 47844                                               |
| 45-49     | 0,00235                      | 42021                                                         | 69211                                                    | 54380                                               |
| 50-54     | 0,00354                      | 36458                                                         | 52827                                                    | 45386                                               |
| 55-59     | 0,00526                      | 24456                                                         | 38377                                                    | 41010                                               |

†Values used in this table are for the urban population

<sup>1</sup> Initial value used in the stock of not-overweight population in 2005.<sup>2</sup> Initial value used in the stock of overweight population in 2005.<sup>3</sup> Initial value used in the stock of obese population in 2005.**Table 97. Man mortality rates and population size by age group for the lower socioeconomic status population (Pacifica region) †**

| Age group | Mortality rates (R) (%/year) | Not- overweight men in 2005 (Number of people) <sup>1</sup> | Overweight men in 2005 (Number of people) <sup>2</sup> | Obese men 2005 (Number of people) <sup>3</sup> |
|-----------|------------------------------|-------------------------------------------------------------|--------------------------------------------------------|------------------------------------------------|
| 0-4       | 0.00307                      | 62753                                                       | 10535                                                  | 4581                                           |

|       |         |       |       |      |
|-------|---------|-------|-------|------|
| 5-9   | 0.00033 | 60992 | 7870  | 984  |
| 10-14 | 0.00038 | 91518 | 6460  | 2153 |
| 15-19 | 0.00275 | 76099 | 0     | 0    |
| 20-24 | 0.00451 | 56168 | 7230  | 1668 |
| 25-29 | 0.00478 | 32995 | 6599  | 3299 |
| 30-34 | 0.00447 | 28613 | 8011  | 4578 |
| 35-39 | 0.00378 | 29216 | 11329 | 2385 |
| 40-44 | 0.00398 | 22394 | 13315 | 4237 |
| 45-49 | 0.00447 | 21327 | 8531  | 3656 |
| 50-54 | 0.00621 | 16597 | 3319  | 1897 |
| 55-59 | 0.00823 | 13099 | 5359  | 1786 |

†Values used in this table are for the urban population

<sup>1</sup> Initial value used in the stock of not-overweight population in 2005 for lower SES.

<sup>2</sup> Initial value used in the stock of overweight population in 2005 for lower SES.

<sup>3</sup> Initial value used in the stock of obese population in 2005 for lower SES.

**Table 98. Women mortality rates and population size by age group for the lower socioeconomic status population (Pacifica region) †**

| Age group | Mortality rates (R) (%/year) | Not- overweight women in 2005 (Number of people) <sup>1</sup> | Overweight women in 2005 (Number of people) <sup>2</sup> | Obese women in 2005 (Number of people) <sup>3</sup> |
|-----------|------------------------------|---------------------------------------------------------------|----------------------------------------------------------|-----------------------------------------------------|
| 0-4       | 0.00252                      | 60770                                                         | 10277                                                    | 4022                                                |
| 5-9       | 0.00019                      | 61118                                                         | 4289                                                     | 2145                                                |
| 10-14     | 0.00028                      | 84410                                                         | 12598                                                    | 0                                                   |
| 15-19     | 0.00059                      | 56848                                                         | 16551                                                    | 2878                                                |
| 20-24     | 0.00085                      | 51013                                                         | 14225                                                    | 3924                                                |
| 25-29     | 0.00095                      | 25262                                                         | 14644                                                    | 6956                                                |
| 30-34     | 0.00101                      | 22850                                                         | 16080                                                    | 7617                                                |
| 35-39     | 0.00132                      | 22670                                                         | 17965                                                    | 9838                                                |
| 40-44     | 0.00157                      | 18080                                                         | 17563                                                    | 11881                                               |
| 45-49     | 0.00235                      | 9149                                                          | 18807                                                    | 12707                                               |
| 50-54     | 0.00354                      | 7429                                                          | 10948                                                    | 8211                                                |
| 55-59     | 0.00526                      | 5330                                                          | 10660                                                    | 8528                                                |

†Values used in this table are for the urban population

<sup>1</sup> Initial value used in the stock of not-overweight population in 2005 for lower SES.

<sup>2</sup> Initial value used in the stock of overweight population in 2005 for lower SES.

<sup>3</sup> Initial value used in the stock of obese population in 2005 for lower SES.

**Table 99. Man mortality rates and population size by age group for the middle socioeconomic status population (Pacifica region) †**

| Age group | Mortality rates (R) (%/year) | Not- overweight men in 2005 (Number of people) <sup>1</sup> | Overweight men in 2005 (Number of people) <sup>2</sup> | Obese men in 2005 (Number of people) <sup>3</sup> |
|-----------|------------------------------|-------------------------------------------------------------|--------------------------------------------------------|---------------------------------------------------|
| 0-4       | 0.00307                      | 46722                                                       | 9161                                                   | 4581                                              |
| 5-9       | 0.00033                      | 65911                                                       | 8854                                                   | 984                                               |
| 10-14     | 0.00038                      | 52757                                                       | 9690                                                   | 3230                                              |
| 15-19     | 0.00275                      | 61030                                                       | 5274                                                   | 1507                                              |
| 20-24     | 0.00451                      | 43933                                                       | 12235                                                  | 2781                                              |
| 25-29     | 0.00478                      | 39044                                                       | 17597                                                  | 6049                                              |
| 30-34     | 0.00447                      | 29185                                                       | 21173                                                  | 5150                                              |
| 35-39     | 0.00378                      | 27427                                                       | 19080                                                  | 5366                                              |
| 40-44     | 0.00398                      | 20578                                                       | 14526                                                  | 3631                                              |
| 45-49     | 0.00447                      | 14624                                                       | 15234                                                  | 4265                                              |
| 50-54     | 0.00621                      | 12329                                                       | 13277                                                  | 2845                                              |
| 55-59     | 0.00823                      | 4168                                                        | 10122                                                  | 4168                                              |

†Values used in this table are for the urban population

1 Initial value used in the stock of not-overweight population in 2005 for middle SES.

2 Initial value used in the stock of overweight population in 2005 for middle SES.

3 Initial value used in the stock of obese population in 2005 for middle SES.

**Table 100. Women mortality rates and population size by age group for the middle socioeconomic status population (Pacifica region) †**

| Age group | Mortality rates (R) (%/year) | Not- overweight women in 2005 (Number of people) <sup>1</sup> | Overweight women in 2005 (Number of people) <sup>2</sup> | Obese women in 2005 (Number of people) <sup>3</sup> |
|-----------|------------------------------|---------------------------------------------------------------|----------------------------------------------------------|-----------------------------------------------------|
| 0-4       | 0.00252                      | 43117                                                         | 13175                                                    | 1996                                                |
| 5-9       | 0.00019                      | 62942                                                         | 8255                                                     | 2064                                                |
| 10-14     | 0.00028                      | 49298                                                         | 8599                                                     | 5732                                                |
| 15-19     | 0.00059                      | 57171                                                         | 9528                                                     | 1270                                                |
| 20-24     | 0.00085                      | 46442                                                         | 13638                                                    | 2580                                                |
| 25-29     | 0.00095                      | 40211                                                         | 21210                                                    | 7070                                                |
| 30-34     | 0.00101                      | 28547                                                         | 22463                                                    | 11699                                               |
| 35-39     | 0.00132                      | 24950                                                         | 19960                                                    | 16079                                               |
| 40-44     | 0.00157                      | 13218                                                         | 18219                                                    | 14647                                               |
| 45-49     | 0.00235                      | 10121                                                         | 15181                                                    | 16101                                               |
| 50-54     | 0.00354                      | 9248                                                          | 14334                                                    | 11097                                               |
| 55-59     | 0.00526                      | 4900                                                          | 7043                                                     | 10412                                               |

†Values used in this table are for the urban population

1 Initial value used in the stock of not-overweight population in 2005 for middle SES.

2 Initial value used in the stock of overweight population in 2005 for middle SES.

3 Initial value used in the stock of obese population in 2005 for middle SES.

**Table 101. Man mortality rates and population size by age group for the higher socioeconomic status population (Pacifica region) †**

| Age group | Mortality rates (R) (%/year) | Not- overweight men in 2005 (Number of people) <sup>1</sup> | Overweight men in 2005 (Number of people) <sup>2</sup> | Obese men in 2005 (Number of people) <sup>3</sup> |
|-----------|------------------------------|-------------------------------------------------------------|--------------------------------------------------------|---------------------------------------------------|
| 0-4       | 0.00307                      | 75121                                                       | 16948                                                  | 4581                                              |
| 5-9       | 0.00033                      | 76732                                                       | 16724                                                  | 9837                                              |
| 10-14     | 0.00038                      | 74291                                                       | 17227                                                  | 4307                                              |
| 15-19     | 0.00275                      | 88908                                                       | 16576                                                  | 3767                                              |
| 20-24     | 0.00451                      | 76744                                                       | 17796                                                  | 5005                                              |
| 25-29     | 0.00478                      | 51692                                                       | 32995                                                  | 7699                                              |
| 30-34     | 0.00447                      | 35480                                                       | 30902                                                  | 10873                                             |
| 35-39     | 0.00378                      | 27427                                                       | 35775                                                  | 15502                                             |
| 40-44     | 0.00398                      | 25420                                                       | 42972                                                  | 16342                                             |
| 45-49     | 0.00447                      | 15234                                                       | 40826                                                  | 12796                                             |
| 50-54     | 0.00621                      | 19916                                                       | 30348                                                  | 9958                                              |
| 55-59     | 0.00823                      | 15481                                                       | 25008                                                  | 6550                                              |

†Values used in this table are for the urban population

<sup>1</sup> Initial value used in the stock of not-overweight population in 2005 for higher SES.

<sup>2</sup> Initial value used in the stock of overweight population in 2005 for higher SES.

<sup>3</sup> Initial value used in the stock of obese population in 2005 for higher SES.

**Table 102. Women mortality rates and population size by age group for the higher socioeconomic status population (Pacifica region) †**

| Age group | Mortality rates (R) (%/year) | Not- overweight women in 2005 (Number of people) <sup>1</sup> | Overweight women in 2005 (Number of people) <sup>2</sup> | Obese women in 2005 (Number of people) <sup>3</sup> |
|-----------|------------------------------|---------------------------------------------------------------|----------------------------------------------------------|-----------------------------------------------------|
|-----------|------------------------------|---------------------------------------------------------------|----------------------------------------------------------|-----------------------------------------------------|

|       |         |       |       |       |
|-------|---------|-------|-------|-------|
| 0-4   | 0.00252 | 66710 | 19848 | 6616  |
| 5-9   | 0.00019 | 71489 | 18330 | 10082 |
| 10-14 | 0.00028 | 78415 | 9013  | 5408  |
| 15-19 | 0.00059 | 84013 | 22597 | 2897  |
| 20-24 | 0.00085 | 83064 | 19301 | 3447  |
| 25-29 | 0.00095 | 64268 | 25954 | 10711 |
| 30-34 | 0.00101 | 45875 | 27973 | 13427 |
| 35-39 | 0.00132 | 38828 | 40279 | 13426 |
| 40-44 | 0.00157 | 35239 | 45052 | 20519 |
| 45-49 | 0.00235 | 22327 | 35291 | 25928 |
| 50-54 | 0.00354 | 19776 | 27820 | 25809 |
| 55-59 | 0.00526 | 14152 | 21409 | 21409 |

†Values used in this table are for the urban population

<sup>1</sup> Initial value used in the stock of not-overweight population in 2005 for higher SES.

<sup>2</sup> Initial value used in the stock of overweight population in 2005 for higher SES.

<sup>3</sup> Initial value used in the stock of obese population in 2005 for higher SES.

**Table 103. Data and projections of the Fertility rates by department and Region (Pacifica region)†**

| Year | Fecundity Rate<br>Depto 19 | Fecundity<br>Rate<br>Depto 27 | Fecundity<br>Rate<br>Depto 52 | Fecundity<br>Rate<br>Depto 76 | Average<br>Region<br>Fecundity<br>Rate |
|------|----------------------------|-------------------------------|-------------------------------|-------------------------------|----------------------------------------|
| 2005 | 2,9221                     | 4,2998                        | 2,8307                        | 2,1453                        | 3,049                                  |
| 2006 | 2,8724                     | 4,2157                        | 2,7773                        | 2,1232                        | 2,997                                  |
| 2007 | 2,8227                     | 4,1316                        | 2,7239                        | 2,1011                        | 2,945                                  |
| 2008 | 2,773                      | 4,0475                        | 2,6705                        | 2,079                         | 2,893                                  |
| 2009 | 2,7509                     | 3,9639                        | 2,6396                        | 2,0708                        | 2,856                                  |
| 2010 | 2,7288                     | 3,8803                        | 2,6087                        | 2,0626                        | 2,820                                  |
| 2011 | 2,7067                     | 3,7967                        | 2,5778                        | 2,0544                        | 2,784                                  |
| 2012 | 2,6846                     | 3,7131                        | 2,5469                        | 2,0462                        | 2,748                                  |
| 2013 | 2,6625                     | 3,6295                        | 2,516                         | 2,038                         | 2,712                                  |
| 2014 | 2,6518                     | 3,5632                        | 2,4997                        | 2,035                         | 2,687                                  |
| 2015 | 2,6411                     | 3,4969                        | 2,4834                        | 2,032                         | 2,663                                  |
| 2016 | 2,6304                     | 3,4306                        | 2,4671                        | 2,029                         | 2,639                                  |
| 2017 | 2,6197                     | 3,3643                        | 2,4508                        | 2,026                         | 2,615                                  |
| 2018 | 2,609                      | 3,298                         | 2,4345                        | 2,023                         | 2,591                                  |
| 2019 | 2,5983                     | 3,2317                        | 2,4182                        | 2,02                          | 2,567                                  |
| 2020 | 2,5876                     | 3,1654                        | 2,4019                        | 2,017                         | 2,543                                  |
| 2021 | 2,5769                     | 3,0991                        | 2,3856                        | 2,014                         | 2,519                                  |
| 2022 | 2,5662                     | 3,0328                        | 2,3693                        | 2,011                         | 2,495                                  |
| 2023 | 2,5555                     | 2,9665                        | 2,353                         | 2,008                         | 2,471                                  |
| 2024 | 2,5448                     | 2,9002                        | 2,3367                        | 2,005                         | 2,447                                  |
| 2025 | 2,5341                     | 2,8339                        | 2,3204                        | 2,002                         | 2,423                                  |

| Year | Fecundity Rate Depto 19 | Fecundity Rate Depto 27 | Fecundity Rate Depto 52 | Fecundity Rate Depto 76 | Average Region Fecundity Rate |
|------|-------------------------|-------------------------|-------------------------|-------------------------|-------------------------------|
| 2026 | 2,5234                  | 2,7676                  | 2,3041                  | 1,999                   | 2,399                         |
| 2027 | 2,5127                  | 2,7013                  | 2,2878                  | 1,996                   | 2,374                         |
| 2028 | 2,502                   | 2,635                   | 2,2715                  | 1,993                   | 2,350                         |
| 2029 | 2,4913                  | 2,5687                  | 2,2552                  | 1,99                    | 2,326                         |
| 2030 | 2,4806                  | 2,5024                  | 2,2389                  | 1,987                   | 2,302                         |

† Data of Fertility rate of DANE [1] was used to forecast the department's fertility rate from 2005 to 2030. Holt-Winters no seasonal method in EViews 5 (Quantitative Micro Software, LLC) was used to forecast the fertility rate. In the SD model we used data from 2005 to 2030 and the region fertility rate was calculated as the average of all departments' fertility rates.

**Table 104. Fraction of births by departments, body mass index category, and socioeconomic status (Pacifica region) †**

| Population group |                 | Lower SES (%/year) | Middle SES (%/year) | Higher SES (%/year) | Complete Urban Population (%/year) |
|------------------|-----------------|--------------------|---------------------|---------------------|------------------------------------|
| Department 19    | Not- overweight | 83,33%             | 75,00%              | 72,73%              | 78,05%                             |
|                  | Overweight      | 11,11%             | 25,00%              | 27,27%              | 19,51%                             |
|                  | Obese           | 5,56%              | 0,00%               | 0,00%               | 2,44%                              |
| Department 27    | Not- overweight | 75,00%             | 60,00%              | 80,00%              | 73,08%                             |
|                  | Overweight      | 18,75%             | 0,00%               | 20,00%              | 15,38%                             |
|                  | Obese           | 6,25%              | 40,00%              | 0,00%               | 11,54%                             |
| Department 52    | Not- overweight | 69,23%             | 83,33%              | 68,75%              | 73,17%                             |
|                  | Overweight      | 23,08%             | 8,33%               | 31,25%              | 21,95%                             |
|                  | Obese           | 7,69%              | 8,33%               | 0,00%               | 4,88%                              |
| Department 76    | Not- overweight | 84,38%             | 81,82%              | 80,00%              | 81,74%                             |
|                  | Overweight      | 9,38%              | 18,18%              | 16,00%              | 14,78%                             |
|                  | Obese           | 6,25%              | 0,00%               | 4,00%               | 3,48%                              |

† The fractions of births by each BMI category correspond to the prevalences by BMI category of children aged 0 to 12 months

**Table 105. Prevalent rates of entire population by age group, and body mass index category (Pacifica region)**

| Departments   | Age group | Not- overweight in 2005 | Overweight in 2005 | Obese in 2005 | Not- overweight in 2010 | Overweight in 2010 | Obese in 2010 |
|---------------|-----------|-------------------------|--------------------|---------------|-------------------------|--------------------|---------------|
| Department 19 | 0-4       | 0.75172                 | 0.19310            | 0.05517       | 0.68485                 | 0.23030            | 0.08485       |
|               | 5-9       | 0.84524                 | 0.10714            | 0.04762       | 0.73418                 | 0.19620            | 0.06962       |
|               | 10-14     | 0.82143                 | 0.16667            | 0.01190       | 0.70202                 | 0.21717            | 0.08081       |
|               | 15-19     | 0.80000                 | 0.17692            | 0.02308       | 0.76471                 | 0.20321            | 0.03209       |
|               | 20-24     | 0.80226                 | 0.19209            | 0.00565       | 0.72789                 | 0.19048            | 0.08163       |
|               | 25-29     | 0.67717                 | 0.22047            | 0.10236       | 0.56338                 | 0.29577            | 0.14085       |
|               | 30-34     | 0.59184                 | 0.29592            | 0.11224       | 0.42975                 | 0.41322            | 0.15702       |
|               | 35-39     | 0.50420                 | 0.33613            | 0.15966       | 0.38983                 | 0.40678            | 0.20339       |
|               | 40-44     | 0.51429                 | 0.35238            | 0.13333       | 0.28704                 | 0.50000            | 0.21296       |
|               | 45-49     | 0.40260                 | 0.33766            | 0.25974       | 0.36190                 | 0.34286            | 0.29524       |
|               | 50-54     | 0.40230                 | 0.33333            | 0.26437       | 0.29885                 | 0.42529            | 0.27586       |
|               | 55-59     | 0.31944                 | 0.41667            | 0.26389       | 0.26744                 | 0.45349            | 0.27907       |
| Department 27 | 0-4       | 0.78992                 | 0.16807            | 0.04202       | 0.75899                 | 0.20144            | 0.03957       |
|               | 5-9       | 0.93023                 | 0.06977            | 0.00000       | 0.85315                 | 0.10140            | 0.04545       |



| Departments   | Age group | Not- overweight in 2005 | Overweight in 2005 | Obese in 2005 | Not- overweight in 2010 | Overweight in 2010 | Obese in 2010 |
|---------------|-----------|-------------------------|--------------------|---------------|-------------------------|--------------------|---------------|
|               | 10-14     | 0.77500                 | 0.18750            | 0.03750       | 0.83730                 | 0.11508            | 0.04762       |
|               | 15-19     | 0.84071                 | 0.14159            | 0.01770       | 0.81538                 | 0.14615            | 0.03846       |
|               | 20-24     | 0.69231                 | 0.21538            | 0.09231       | 0.73077                 | 0.18803            | 0.08120       |
|               | 25-29     | 0.54128                 | 0.30275            | 0.15596       | 0.51705                 | 0.32386            | 0.15909       |
|               | 30-34     | 0.48936                 | 0.37234            | 0.13830       | 0.37903                 | 0.39516            | 0.22581       |
|               | 35-39     | 0.44048                 | 0.33333            | 0.22619       | 0.38393                 | 0.33036            | 0.28571       |
|               | 40-44     | 0.30159                 | 0.36508            | 0.33333       | 0.33600                 | 0.41600            | 0.24800       |
|               | 45-49     | 0.17105                 | 0.51316            | 0.31579       | 0.25773                 | 0.41237            | 0.32990       |
|               | 50-54     | 0.24194                 | 0.41935            | 0.33871       | 0.39796                 | 0.33673            | 0.26531       |
|               | 55-59     | 0.21277                 | 0.40426            | 0.38298       | 0.36486                 | 0.32432            | 0.31081       |
| Department 52 | 0-4       | 0.73118                 | 0.19355            | 0.07527       | 0.70051                 | 0.24365            | 0.05584       |
|               | 5-9       | 0.75556                 | 0.18889            | 0.05556       | 0.78764                 | 0.15830            | 0.05405       |
|               | 10-14     | 0.85000                 | 0.10000            | 0.05000       | 0.74161                 | 0.21812            | 0.04027       |
|               | 15-19     | 0.87200                 | 0.10400            | 0.02400       | 0.80672                 | 0.16387            | 0.02941       |
|               | 20-24     | 0.77515                 | 0.19527            | 0.02959       | 0.71642                 | 0.23881            | 0.04478       |
|               | 25-29     | 0.56395                 | 0.37209            | 0.06395       | 0.56742                 | 0.33708            | 0.09551       |
|               | 30-34     | 0.42553                 | 0.47518            | 0.09929       | 0.41860                 | 0.45349            | 0.12791       |
|               | 35-39     | 0.39735                 | 0.47682            | 0.12583       | 0.39306                 | 0.37572            | 0.23121       |
|               | 40-44     | 0.31250                 | 0.46875            | 0.21875       | 0.28571                 | 0.45455            | 0.25974       |
|               | 45-49     | 0.25191                 | 0.37405            | 0.37405       | 0.31690                 | 0.43662            | 0.24648       |
| Department 76 | 50-54     | 0.34653                 | 0.36634            | 0.28713       | 0.26471                 | 0.45098            | 0.28431       |
|               | 55-59     | 0.23596                 | 0.37079            | 0.39326       | 0.17073                 | 0.43902            | 0.39024       |
|               | 0-4       | 0.78571                 | 0.16117            | 0.05311       | 0.75436                 | 0.17456            | 0.07107       |
|               | 5-9       | 0.80287                 | 0.13262            | 0.06452       | 0.72822                 | 0.17770            | 0.09408       |
|               | 10-14     | 0.84074                 | 0.10000            | 0.05926       | 0.74078                 | 0.18046            | 0.07876       |
|               | 15-19     | 0.82703                 | 0.14595            | 0.02703       | 0.79709                 | 0.15921            | 0.04370       |
|               | 20-24     | 0.78309                 | 0.17279            | 0.04412       | 0.70483                 | 0.21628            | 0.07888       |
|               | 25-29     | 0.62292                 | 0.27083            | 0.10625       | 0.57009                 | 0.31242            | 0.11749       |
|               | 30-34     | 0.52784                 | 0.30067            | 0.17149       | 0.44330                 | 0.39175            | 0.16495       |
|               | 35-39     | 0.45000                 | 0.38095            | 0.16905       | 0.37458                 | 0.40803            | 0.21739       |
| Department 19 | 40-44     | 0.35867                 | 0.43468            | 0.20665       | 0.37426                 | 0.43195            | 0.19379       |
|               | 45-49     | 0.31871                 | 0.46784            | 0.21345       | 0.34506                 | 0.39698            | 0.25796       |
|               | 50-54     | 0.33623                 | 0.43188            | 0.23188       | 0.29562                 | 0.39234            | 0.31204       |
|               | 55-59     | 0.31132                 | 0.41509            | 0.27358       | 0.27902                 | 0.43750            | 0.28348       |

**Table 106. Prevalent rates of lower socioeconomic status population by age group, and body mass index category (Pacifica region)**

| Departments   | Age group | Not- overweight in 2005 | Overweight in 2005 | Obese in 2005 | Not- overweight in 2010 | Overweight in 2010 | Obese in 2010 |
|---------------|-----------|-------------------------|--------------------|---------------|-------------------------|--------------------|---------------|
| Department 19 | 0-4       | 0.82353                 | 0.10294            | 0.07353       | 0.71014                 | 0.21739            | 0.07246       |
|               | 5-9       | 0.93103                 | 0.06897            | 0.00000       | 0.77193                 | 0.17544            | 0.05263       |
|               | 10-14     | 0.85294                 | 0.14706            | 0.00000       | 0.70886                 | 0.18987            | 0.10127       |
|               | 15-19     | 0.87805                 | 0.12195            | 0.00000       | 0.77419                 | 0.22581            | 0.00000       |
|               | 20-24     | 0.83333                 | 0.16667            | 0.00000       | 0.68333                 | 0.23333            | 0.08333       |
|               | 25-29     | 0.59459                 | 0.21622            | 0.18919       | 0.52273                 | 0.34091            | 0.13636       |

| Departments   | Age group     | Not- overweight in 2005 | Overweight in 2005 | Obese in 2005 | Not- overweight in 2010 | Overweight in 2010 | Obese in 2010 |
|---------------|---------------|-------------------------|--------------------|---------------|-------------------------|--------------------|---------------|
|               | 30-34         | 0.58974                 | 0.20513            | 0.20513       | 0.35714                 | 0.42857            | 0.21429       |
|               | 35-39         | 0.52381                 | 0.35714            | 0.11905       | 0.39394                 | 0.36364            | 0.24242       |
|               | 40-44         | 0.62500                 | 0.18750            | 0.18750       | 0.31250                 | 0.50000            | 0.18750       |
|               | 45-49         | 0.66667                 | 0.16667            | 0.16667       | 0.41667                 | 0.29167            | 0.29167       |
|               | 50-54         | 0.57143                 | 0.17857            | 0.25000       | 0.40741                 | 0.37037            | 0.22222       |
|               | 55-59         | 0.38462                 | 0.30769            | 0.30769       | 0.33333                 | 0.40000            | 0.26667       |
| Department 27 | 0-4           | 0.80952                 | 0.15476            | 0.03571       | 0.76226                 | 0.20000            | 0.03774       |
|               | 5-9           | 0.96875                 | 0.03125            | 0.00000       | 0.85348                 | 0.09890            | 0.04762       |
|               | 10-14         | 0.83333                 | 0.14583            | 0.02083       | 0.82759                 | 0.12069            | 0.05172       |
|               | 15-19         | 0.85246                 | 0.13115            | 0.01639       | 0.81667                 | 0.15417            | 0.02917       |
|               | 20-24         | 0.74684                 | 0.17722            | 0.07595       | 0.72646                 | 0.19283            | 0.08072       |
|               | 25-29         | 0.63043                 | 0.21739            | 0.15217       | 0.49677                 | 0.33548            | 0.16774       |
|               | 30-34         | 0.57692                 | 0.34615            | 0.07692       | 0.37719                 | 0.41228            | 0.21053       |
|               | 35-39         | 0.54167                 | 0.31250            | 0.14583       | 0.39048                 | 0.31429            | 0.29524       |
|               | 40-44         | 0.41379                 | 0.31034            | 0.27586       | 0.35088                 | 0.40351            | 0.24561       |
|               | 45-49         | 0.23404                 | 0.46809            | 0.29787       | 0.24731                 | 0.43011            | 0.32258       |
|               | 50-54         | 0.28571                 | 0.50000            | 0.21429       | 0.37931                 | 0.36782            | 0.25287       |
|               | 55-59         | 0.26087                 | 0.43478            | 0.30435       | 0.38095                 | 0.31746            | 0.30159       |
|               | Department 52 | 0-4                     | 0.68852            | 0.18033       | 0.13115                 | 0.70370            | 0.24074       |
| 5-9           |               | 0.77778                 | 0.14815            | 0.07407       | 0.80986                 | 0.14789            | 0.04225       |
| 10-14         |               | 0.93750                 | 0.03125            | 0.03125       | 0.74324                 | 0.22297            | 0.03378       |
| 15-19         |               | 0.91892                 | 0.05405            | 0.02703       | 0.76471                 | 0.19118            | 0.04412       |
| 20-24         |               | 0.78125                 | 0.18750            | 0.03125       | 0.70787                 | 0.25843            | 0.03371       |
| 25-29         |               | 0.60870                 | 0.28261            | 0.10870       | 0.58904                 | 0.28767            | 0.12329       |
| 30-34         |               | 0.46429                 | 0.46429            | 0.07143       | 0.35714                 | 0.48571            | 0.15714       |
| 35-39         |               | 0.51351                 | 0.32432            | 0.16216       | 0.38806                 | 0.41791            | 0.19403       |
| 40-44         |               | 0.39286                 | 0.39286            | 0.21429       | 0.31034                 | 0.46552            | 0.22414       |
| 45-49         |               | 0.35714                 | 0.32143            | 0.32143       | 0.32558                 | 0.37209            | 0.30233       |
| 50-54         |               | 0.56250                 | 0.12500            | 0.31250       | 0.38462                 | 0.28205            | 0.33333       |
| 55-59         |               | 0.53333                 | 0.26667            | 0.20000       | 0.20690                 | 0.48276            | 0.31034       |
| Department 76 |               | 0-4                     | 0.85600            | 0.12000       | 0.02400                 | 0.73826            | 0.22819       |
|               | 5-9           | 0.86957                 | 0.10870            | 0.02174       | 0.84146                 | 0.14634            | 0.01220       |
|               | 10-14         | 0.94643                 | 0.05357            | 0.00000       | 0.84568                 | 0.12346            | 0.03086       |
|               | 15-19         | 0.85294                 | 0.11765            | 0.02941       | 0.82677                 | 0.12598            | 0.04724       |
|               | 20-24         | 0.81609                 | 0.13793            | 0.04598       | 0.68868                 | 0.19811            | 0.11321       |
|               | 25-29         | 0.64935                 | 0.27273            | 0.07792       | 0.52747                 | 0.32967            | 0.14286       |
|               | 30-34         | 0.60317                 | 0.20635            | 0.19048       | 0.42466                 | 0.35616            | 0.21918       |
|               | 35-39         | 0.55556                 | 0.30159            | 0.14286       | 0.40000                 | 0.32308            | 0.27692       |
|               | 40-44         | 0.42029                 | 0.43478            | 0.14493       | 0.58333                 | 0.30000            | 0.11667       |
|               | 45-49         | 0.47619                 | 0.40476            | 0.11905       | 0.45902                 | 0.24590            | 0.29508       |
|               | 50-54         | 0.50000                 | 0.33333            | 0.16667       | 0.46000                 | 0.36000            | 0.18000       |
|               | 55-59         | 0.44828                 | 0.37931            | 0.17241       | 0.37500                 | 0.42500            | 0.20000       |

**Table 107. Prevalent rates of middle socioeconomic status population by age group, and body mass index category (Pacifica region)**

| Departments      | Age group | Not- overweight<br>in 2005 | Overweight<br>in 2005 | Obese in<br>2005 | Not- overweight<br>in 2010 | Overweight<br>in 2010 | Obese in<br>2010 |
|------------------|-----------|----------------------------|-----------------------|------------------|----------------------------|-----------------------|------------------|
| Department<br>19 | 0-4       | 0.74359                    | 0.23077               | 0.02564          | 0.68354                    | 0.21519               | 0.10127          |
|                  | 5-9       | 0.85714                    | 0.10714               | 0.03571          | 0.69014                    | 0.25352               | 0.05634          |
|                  | 10-14     | 0.80769                    | 0.19231               | 0.00000          | 0.67500                    | 0.27500               | 0.05000          |
|                  | 15-19     | 0.77143                    | 0.20000               | 0.02857          | 0.75510                    | 0.20408               | 0.04082          |
|                  | 20-24     | 0.78378                    | 0.21622               | 0.00000          | 0.75000                    | 0.15625               | 0.09375          |
|                  | 25-29     | 0.63158                    | 0.28947               | 0.07895          | 0.52239                    | 0.28358               | 0.19403          |
|                  | 30-34     | 0.68000                    | 0.28000               | 0.04000          | 0.50769                    | 0.36923               | 0.12308          |
|                  | 35-39     | 0.50000                    | 0.26923               | 0.23077          | 0.28571                    | 0.50000               | 0.21429          |
|                  | 40-44     | 0.44000                    | 0.40000               | 0.16000          | 0.23404                    | 0.46809               | 0.29787          |
|                  | 45-49     | 0.43478                    | 0.30435               | 0.26087          | 0.31481                    | 0.33333               | 0.35185          |
|                  | 50-54     | 0.35294                    | 0.35294               | 0.29412          | 0.23529                    | 0.44118               | 0.32353          |
| 55-59            | 0.32000   | 0.40000                    | 0.28000               | 0.28947          | 0.42105                    | 0.28947               |                  |
| Department<br>27 | 0-4       | 0.73684                    | 0.15789               | 0.10526          | 0.75000                    | 0.16667               | 0.08333          |
|                  | 5-9       | 0.88889                    | 0.11111               | 0.00000          | 0.84615                    | 0.15385               | 0.00000          |
|                  | 10-14     | 0.60000                    | 0.32000               | 0.08000          | 0.94737                    | 0.05263               | 0.00000          |
|                  | 15-19     | 0.77778                    | 0.18519               | 0.03704          | 0.78947                    | 0.05263               | 0.15789          |
|                  | 20-24     | 0.55172                    | 0.27586               | 0.17241          | 0.75000                    | 0.12500               | 0.12500          |
|                  | 25-29     | 0.48571                    | 0.34286               | 0.17143          | 0.70588                    | 0.17647               | 0.11765          |
|                  | 30-34     | 0.44828                    | 0.34483               | 0.20690          | 0.44444                    | 0.11111               | 0.44444          |
|                  | 35-39     | 0.31818                    | 0.31818               | 0.36364          | 0.33333                    | 0.66667               | 0.00000          |
|                  | 40-44     | 0.17391                    | 0.47826               | 0.34783          | 0.10000                    | 0.60000               | 0.30000          |
|                  | 45-49     | 0.11111                    | 0.50000               | 0.38889          | 0.50000                    | 0.00000               | 0.50000          |
|                  | 50-54     | 0.16667                    | 0.41667               | 0.41667          | 0.54545                    | 0.09091               | 0.36364          |
| 55-59            | 0.18182   | 0.18182                    | 0.63636               | 0.30000          | 0.40000                    | 0.30000               |                  |
| Department<br>52 | 0-4       | 0.70909                    | 0.23636               | 0.05455          | 0.67143                    | 0.25714               | 0.07143          |
|                  | 5-9       | 0.80645                    | 0.19355               | 0.00000          | 0.76087                    | 0.16304               | 0.07609          |
|                  | 10-14     | 0.81579                    | 0.10526               | 0.07895          | 0.75000                    | 0.20370               | 0.04630          |
|                  | 15-19     | 0.91892                    | 0.08108               | 0.00000          | 0.84810                    | 0.13924               | 0.01266          |
|                  | 20-24     | 0.75610                    | 0.21951               | 0.02439          | 0.70423                    | 0.25352               | 0.04225          |
|                  | 25-29     | 0.54902                    | 0.43137               | 0.01961          | 0.53750                    | 0.36250               | 0.10000          |
|                  | 30-34     | 0.37255                    | 0.54902               | 0.07843          | 0.46875                    | 0.40625               | 0.12500          |
|                  | 35-39     | 0.43902                    | 0.39024               | 0.17073          | 0.38554                    | 0.38554               | 0.22892          |
|                  | 40-44     | 0.27027                    | 0.40541               | 0.32432          | 0.30159                    | 0.42857               | 0.26984          |
|                  | 45-49     | 0.25000                    | 0.32143               | 0.42857          | 0.34848                    | 0.42424               | 0.22727          |
|                  | 50-54     | 0.28000                    | 0.44000               | 0.28000          | 0.19444                    | 0.55556               | 0.25000          |
| 55-59            | 0.18519   | 0.37037                    | 0.44444               | 0.19355          | 0.35484                    | 0.45161               |                  |
| Department<br>76 | 0-4       | 0.77576                    | 0.16970               | 0.05455          | 0.75102                    | 0.18367               | 0.06531          |
|                  | 5-9       | 0.88750                    | 0.08750               | 0.02500          | 0.78226                    | 0.13710               | 0.08065          |
|                  | 10-14     | 0.81928                    | 0.08434               | 0.09639          | 0.75899                    | 0.16906               | 0.07194          |
|                  | 15-19     | 0.90816                    | 0.07143               | 0.02041          | 0.81423                    | 0.16996               | 0.01581          |
|                  | 20-24     | 0.76331                    | 0.20118               | 0.03550          | 0.70588                    | 0.23039               | 0.06373          |
|                  | 25-29     | 0.64138                    | 0.24138               | 0.11724          | 0.51905                    | 0.35238               | 0.12857          |
|                  | 30-34     | 0.50000                    | 0.31746               | 0.18254          | 0.44388                    | 0.38265               | 0.17347          |
|                  | 35-39     | 0.49074                    | 0.35185               | 0.15741          | 0.33784                    | 0.42568               | 0.23649          |
| 40-44            | 0.42593   | 0.36111                    | 0.21296               | 0.46875          | 0.36250                    | 0.16875               |                  |

| Departments | Age group | Not- overweight in 2005 | Overweight in 2005 | Obese in 2005 | Not- overweight in 2010 | Overweight in 2010 | Obese in 2010 |
|-------------|-----------|-------------------------|--------------------|---------------|-------------------------|--------------------|---------------|
|             | 45-49     | 0.35065                 | 0.42857            | 0.22078       | 0.28448                 | 0.50000            | 0.21552       |
|             | 50-54     | 0.38272                 | 0.45679            | 0.16049       | 0.29839                 | 0.26613            | 0.43548       |
|             | 55-59     | 0.19512                 | 0.43902            | 0.36585       | 0.32558                 | 0.40698            | 0.26744       |

**Table 108. Prevalent rates of higher socioeconomic status population by age group, and body mass index category (Pacifica region)**

| Departments   | Age group | Not- overweight in 2005 | Overweight in 2005 | Obese in 2005 | Not- overweight in 2010 | Overweight in 2010 | Obese in 2010 |
|---------------|-----------|-------------------------|--------------------|---------------|-------------------------|--------------------|---------------|
| Department 19 | 0-4       | 0.63158                 | 0.31579            | 0.05263       | 0.58824                 | 0.35294            | 0.05882       |
|               | 5-9       | 0.74074                 | 0.14815            | 0.11111       | 0.76667                 | 0.10000            | 0.13333       |
|               | 10-14     | 0.79167                 | 0.16667            | 0.04167       | 0.74359                 | 0.15385            | 0.10256       |
|               | 15-19     | 0.75926                 | 0.20370            | 0.03704       | 0.77778                 | 0.14815            | 0.07407       |
|               | 20-24     | 0.78750                 | 0.20000            | 0.01250       | 0.78261                 | 0.17391            | 0.04348       |
|               | 25-29     | 0.76923                 | 0.17308            | 0.05769       | 0.70968                 | 0.25806            | 0.03226       |
|               | 30-34     | 0.52941                 | 0.41176            | 0.05882       | 0.32143                 | 0.50000            | 0.17857       |
|               | 35-39     | 0.49020                 | 0.35294            | 0.15686       | 0.58621                 | 0.27586            | 0.13793       |
|               | 40-44     | 0.47917                 | 0.43750            | 0.08333       | 0.34483                 | 0.55172            | 0.10345       |
|               | 45-49     | 0.25000                 | 0.44444            | 0.30556       | 0.40741                 | 0.40741            | 0.18519       |
|               | 50-54     | 0.30952                 | 0.42857            | 0.26190       | 0.26923                 | 0.46154            | 0.26923       |
| 55-59         | 0.29412   | 0.47059                 | 0.23529            | 0.21212       | 0.51515                 | 0.27273            |               |
| Department 52 | 0-4       | 0.78571                 | 0.17143            | 0.04286       | 0.78947                 | 0.21053            | 0.00000       |
|               | 5-9       | 0.68750                 | 0.21875            | 0.09375       | 0.76000                 | 0.20000            | 0.04000       |
|               | 10-14     | 0.80000                 | 0.16667            | 0.03333       | 0.71429                 | 0.23810            | 0.04762       |
|               | 15-19     | 0.80392                 | 0.15686            | 0.03922       | 0.91304                 | 0.08696            | 0.00000       |
|               | 20-24     | 0.78125                 | 0.18750            | 0.03125       | 0.75610                 | 0.17073            | 0.07317       |
|               | 25-29     | 0.54667                 | 0.38667            | 0.06667       | 0.60000                 | 0.40000            | 0.00000       |
|               | 30-34     | 0.45161                 | 0.41935            | 0.12903       | 0.44737                 | 0.47368            | 0.07895       |
|               | 35-39     | 0.31507                 | 0.60274            | 0.08219       | 0.43478                 | 0.21739            | 0.34783       |
|               | 40-44     | 0.30159                 | 0.53968            | 0.15873       | 0.21212                 | 0.48485            | 0.30303       |
|               | 45-49     | 0.21333                 | 0.41333            | 0.37333       | 0.24242                 | 0.54545            | 0.21212       |
|               | 50-54     | 0.31667                 | 0.40000            | 0.28333       | 0.18519                 | 0.55556            | 0.25926       |
| 55-59         | 0.17021   | 0.40426                 | 0.42553            | 0.09091       | 0.50000                 | 0.40909            |               |
| Department 76 | 0-4       | 0.75781                 | 0.17578            | 0.06641       | 0.75781                 | 0.17578            | 0.06641       |
|               | 5-9       | 0.73856                 | 0.16340            | 0.09804       | 0.73856                 | 0.16340            | 0.09804       |
|               | 10-14     | 0.80916                 | 0.12977            | 0.06107       | 0.80916                 | 0.12977            | 0.06107       |
|               | 15-19     | 0.77941                 | 0.19118            | 0.02941       | 0.77941                 | 0.19118            | 0.02941       |
|               | 20-24     | 0.78472                 | 0.16667            | 0.04861       | 0.78472                 | 0.16667            | 0.04861       |
|               | 25-29     | 0.60465                 | 0.28682            | 0.10853       | 0.60465                 | 0.28682            | 0.10853       |
|               | 30-34     | 0.52308                 | 0.31538            | 0.16154       | 0.52308                 | 0.31538            | 0.16154       |
|               | 35-39     | 0.40562                 | 0.41365            | 0.18072       | 0.40562                 | 0.41365            | 0.18072       |
|               | 40-44     | 0.31148                 | 0.46721            | 0.22131       | 0.31148                 | 0.46721            | 0.22131       |
|               | 45-49     | 0.27803                 | 0.49327            | 0.22870       | 0.27803                 | 0.49327            | 0.22870       |
|               | 50-54     | 0.28829                 | 0.44144            | 0.27027       | 0.28829                 | 0.44144            | 0.27027       |
| 55-59         | 0.31690   | 0.41549                 | 0.26761            | 0.31690       | 0.41549                 | 0.26761            |               |

**Table 109. Mortality rates and population size by age group at the department level without segregate by socioeconomic status (Pacifica region) †**

| Departments   | Age group | Mortality rates (R) (%/year) | Not- overweight population in 2005 (Number of people)1 | Overweight population in 2005 (Number of people)2 | Obese population in 2005 (Number of people)3 |
|---------------|-----------|------------------------------|--------------------------------------------------------|---------------------------------------------------|----------------------------------------------|
| Department 19 | 0-4       | 0.00309                      | 36437                                                  | 9360                                              | 2674                                         |
|               | 5-9       | 0.00028                      | 44819                                                  | 5681                                              | 2525                                         |
|               | 10-14     | 0.00024                      | 44884                                                  | 9107                                              | 650                                          |
|               | 15-19     | 0.00181                      | 40556                                                  | 8969                                              | 1170                                         |
|               | 20-24     | 0.00250                      | 37846                                                  | 9062                                              | 267                                          |
|               | 25-29     | 0.00302                      | 26260                                                  | 8550                                              | 3970                                         |
|               | 30-34     | 0.00294                      | 18296                                                  | 9148                                              | 3470                                         |
|               | 35-39     | 0.00275                      | 15428                                                  | 10285                                             | 4886                                         |
|               | 40-44     | 0.00321                      | 15055                                                  | 10316                                             | 3903                                         |
|               | 45-49     | 0.00387                      | 10094                                                  | 8466                                              | 6512                                         |
|               | 50-54     | 0.00425                      | 8229                                                   | 6818                                              | 5408                                         |
| 55-59         | 0.00776   | 4814                         | 6280                                                   | 3977                                              |                                              |
| Department 27 | 0-4       | 0.00440                      | 22963                                                  | 4886                                              | 1221                                         |
|               | 5-9       | 0.00059                      | 26607                                                  | 1996                                              | 0                                            |
|               | 10-14     | 0.00065                      | 22659                                                  | 5482                                              | 1096                                         |
|               | 15-19     | 0.00136                      | 23515                                                  | 3960                                              | 495                                          |
|               | 20-24     | 0.00206                      | 13767                                                  | 4283                                              | 1836                                         |
|               | 25-29     | 0.00235                      | 8285                                                   | 4634                                              | 2387                                         |
|               | 30-34     | 0.00185                      | 5809                                                   | 4420                                              | 1642                                         |
|               | 35-39     | 0.00216                      | 4900                                                   | 3708                                              | 2516                                         |
|               | 40-44     | 0.00200                      | 3016                                                   | 3650                                              | 3333                                         |
|               | 45-49     | 0.00381                      | 1573                                                   | 4719                                              | 2904                                         |
|               | 50-54     | 0.00436                      | 1608                                                   | 2787                                              | 2251                                         |
| 55-59         | 0.00591   | 1044                         | 1983                                                   | 1879                                              |                                              |
| Department 52 | 0-4       | 0.00270                      | 52291                                                  | 13842                                             | 5383                                         |
|               | 5-9       | 0.00015                      | 55525                                                  | 13881                                             | 4083                                         |
|               | 10-14     | 0.00019                      | 62976                                                  | 7409                                              | 3704                                         |
|               | 15-19     | 0.00074                      | 63642                                                  | 7590                                              | 1752                                         |
|               | 20-24     | 0.00147                      | 53883                                                  | 13574                                             | 2057                                         |
|               | 25-29     | 0.00133                      | 33581                                                  | 22157                                             | 3808                                         |
|               | 30-34     | 0.00144                      | 20726                                                  | 23144                                             | 4836                                         |
|               | 35-39     | 0.00134                      | 19595                                                  | 23514                                             | 6205                                         |
|               | 40-44     | 0.00181                      | 13464                                                  | 20196                                             | 9425                                         |
|               | 45-49     | 0.00200                      | 8963                                                   | 13308                                             | 13308                                        |
|               | 50-54     | 0.00261                      | 10100                                                  | 10678                                             | 8369                                         |
| 55-59         | 0.00450   | 5403                         | 8491                                                   | 9006                                              |                                              |
| Department 76 | 0-4       | 0.00269                      | 240302                                                 | 49293                                             | 16244                                        |
|               | 5-9       | 0.00025                      | 265413                                                 | 43840                                             | 21328                                        |
|               | 10-14     | 0.00035                      | 292694                                                 | 34814                                             | 20630                                        |
|               | 15-19     | 0.00196                      | 278955                                                 | 49227                                             | 9116                                         |

| Departments | Age group | Mortality rates (R) (%/year) | Not- overweight population in 2005 (Number of people)1 | Overweight population in 2005 (Number of people)2 | Obese population in 2005 (Number of people)3 |
|-------------|-----------|------------------------------|--------------------------------------------------------|---------------------------------------------------|----------------------------------------------|
|             | 20-24     | 0.00299                      | 248696                                                 | 54876                                             | 14011                                        |
|             | 25-29     | 0.00317                      | 181222                                                 | 78792                                             | 30911                                        |
|             | 30-34     | 0.00298                      | 140126                                                 | 79819                                             | 45526                                        |
|             | 35-39     | 0.00280                      | 120509                                                 | 102018                                            | 45270                                        |
|             | 40-44     | 0.00298                      | 91932                                                  | 111415                                            | 52968                                        |
|             | 45-49     | 0.00373                      | 68100                                                  | 99963                                             | 45608                                        |
|             | 50-54     | 0.00562                      | 58095                                                  | 74622                                             | 40065                                        |
|             | 55-59     | 0.00749                      | 41714                                                  | 55618                                             | 36657                                        |

<sup>†</sup>Values used in this table are for the urban population

<sup>1</sup> Initial value used in the stock of not-overweight population in 2005.

<sup>2</sup> Initial value used in the stock of overweight population in 2005.

<sup>3</sup> Initial value used in the stock of obese population in 2005.

**Table 110. Mortality rates and population size by age group at the department level for the lower socioeconomic status population (Pacifica region) <sup>†</sup>**

| Departments   | Age group | Mortality rates (R) (%/year) | Not- overweight population in 2005 (Number of people)1 | Overweight population in 2005 (Number of people)2 | Obese population in 2005 (Number of people)3 |
|---------------|-----------|------------------------------|--------------------------------------------------------|---------------------------------------------------|----------------------------------------------|
| Department 19 | 0-4       | 0.00309                      | 18720                                                  | 2340                                              | 1671                                         |
|               | 5-9       | 0.00028                      | 17044                                                  | 1263                                              | 0                                            |
|               | 10-14     | 0.00024                      | 18864                                                  | 3252                                              | 0                                            |
|               | 15-19     | 0.00181                      | 14039                                                  | 1950                                              | 0                                            |
|               | 20-24     | 0.00250                      | 13326                                                  | 2665                                              | 0                                            |
|               | 25-29     | 0.00302                      | 6718                                                   | 2443                                              | 2137                                         |
|               | 30-34     | 0.00294                      | 7255                                                   | 2524                                              | 2524                                         |
|               | 35-39     | 0.00275                      | 5657                                                   | 3857                                              | 1286                                         |
|               | 40-44     | 0.00321                      | 5576                                                   | 1673                                              | 1673                                         |
|               | 45-49     | 0.00387                      | 3907                                                   | 977                                               | 977                                          |
|               | 50-54     | 0.00425                      | 3762                                                   | 1176                                              | 1646                                         |
|               | 55-59     | 0.00776                      | 1047                                                   | 837                                               | 837                                          |
| Department 27 | 0-4       | 0.00440                      | 5388                                                   | 1030                                              | 238                                          |
|               | 5-9       | 0.00059                      | 4569                                                   | 147                                               | 0                                            |
|               | 10-14     | 0.00065                      | 5053                                                   | 884                                               | 126                                          |
|               | 15-19     | 0.00136                      | 4382                                                   | 674                                               | 84                                           |
|               | 20-24     | 0.00206                      | 2375                                                   | 564                                               | 242                                          |
|               | 25-29     | 0.00235                      | 1548                                                   | 534                                               | 374                                          |
|               | 30-34     | 0.00185                      | 961                                                    | 577                                               | 128                                          |
|               | 35-39     | 0.00216                      | 904                                                    | 521                                               | 243                                          |
|               | 40-44     | 0.00200                      | 678                                                    | 509                                               | 452                                          |
|               | 45-49     | 0.00381                      | 264                                                    | 529                                               | 336                                          |
| Department 52 | 50-54     | 0.00436                      | 231                                                    | 405                                               | 173                                          |
|               | 55-59     | 0.00591                      | 175                                                    | 292                                               | 204                                          |
|               | 0-4       | 0.00270                      | 16149                                                  | 4229                                              | 3076                                         |
|               | 5-9       | 0.00015                      | 17147                                                  | 3266                                              | 1633                                         |

| Departments   | Age group | Mortality rates (R) (%/year) | Not- overweight population in 2005 (Number of people)1 | Overweight population in 2005 (Number of people)2 | Obese population in 2005 (Number of people)3 |
|---------------|-----------|------------------------------|--------------------------------------------------------|---------------------------------------------------|----------------------------------------------|
|               | 10-14     | 0.00019                      | 22227                                                  | 741                                               | 741                                          |
|               | 15-19     | 0.00074                      | 19852                                                  | 1168                                              | 584                                          |
|               | 20-24     | 0.00147                      | 10283                                                  | 2468                                              | 411                                          |
|               | 25-29     | 0.00133                      | 9694                                                   | 4501                                              | 1731                                         |
|               | 30-34     | 0.00144                      | 4491                                                   | 4491                                              | 691                                          |
|               | 35-39     | 0.00134                      | 6205                                                   | 3919                                              | 1960                                         |
|               | 40-44     | 0.00181                      | 3703                                                   | 3703                                              | 2020                                         |
|               | 45-49     | 0.00200                      | 2716                                                   | 2444                                              | 2444                                         |
|               | 50-54     | 0.00261                      | 2597                                                   | 577                                               | 1443                                         |
|               | 55-59     | 0.00450                      | 2058                                                   | 1029                                              | 772                                          |
| Department 76 | 0-4       | 0.00269                      | 59935                                                  | 8402                                              | 1680                                         |
|               | 5-9       | 0.00025                      | 47395                                                  | 5924                                              | 1185                                         |
|               | 10-14     | 0.00035                      | 68338                                                  | 3868                                              | 0                                            |
|               | 15-19     | 0.00196                      | 52874                                                  | 7293                                              | 1823                                         |
|               | 20-24     | 0.00299                      | 41449                                                  | 7006                                              | 2335                                         |
|               | 25-29     | 0.00317                      | 30305                                                  | 12728                                             | 3637                                         |
|               | 30-34     | 0.00298                      | 22467                                                  | 7686                                              | 7095                                         |
|               | 35-39     | 0.00280                      | 22316                                                  | 12115                                             | 5739                                         |
|               | 40-44     | 0.00298                      | 17656                                                  | 18265                                             | 6088                                         |
|               | 45-49     | 0.00373                      | 12495                                                  | 10621                                             | 3124                                         |
|               | 50-54     | 0.00562                      | 10517                                                  | 7011                                              | 3506                                         |
|               | 55-59     | 0.00749                      | 8216                                                   | 6952                                              | 3160                                         |

†Values used in this table are for the urban population

<sup>1</sup> Initial value used in the stock of not-overweight population in 2005 for lower SES.

<sup>2</sup> Initial value used in the stock of overweight population in 2005 for lower SES.

<sup>3</sup> Initial value used in the stock of obese population in 2005 for lower SES.

**Table 111. Mortality rates and population size by age group at the department level for the middle socioeconomic status population (Pacifica region) †**

| Departments   | Age group | Mortality rates (R) (%/year) | Not- overweight population in 2005 (Number of people)1 | Overweight population in 2005 (Number of people)2 | Obese population in 2005 (Number of people)3 |
|---------------|-----------|------------------------------|--------------------------------------------------------|---------------------------------------------------|----------------------------------------------|
| Department 19 | 0-4       | 0.00309                      | 9694                                                   | 3009                                              | 334                                          |
|               | 5-9       | 0.00028                      | 15150                                                  | 1894                                              | 631                                          |
|               | 10-14     | 0.00024                      | 13660                                                  | 3252                                              | 0                                            |
|               | 15-19     | 0.00181                      | 10529                                                  | 2730                                              | 390                                          |
|               | 20-24     | 0.00250                      | 7729                                                   | 2132                                              | 0                                            |
|               | 25-29     | 0.00302                      | 7329                                                   | 3359                                              | 916                                          |
|               | 30-34     | 0.00294                      | 5363                                                   | 2208                                              | 315                                          |
|               | 35-39     | 0.00275                      | 3343                                                   | 1800                                              | 1543                                         |
|               | 40-44     | 0.00321                      | 3067                                                   | 2788                                              | 1115                                         |
|               | 45-49     | 0.00387                      | 3256                                                   | 2279                                              | 1954                                         |
|               | 50-54     | 0.00425                      | 1411                                                   | 1411                                              | 1176                                         |
|               | 55-59     | 0.00776                      | 1675                                                   | 2093                                              | 1465                                         |

| Departments   | Age group | Mortality rates (R) (%/year) | Not- overweight population in 2005 (Number of people) <sup>1</sup> | Overweight population in 2005 (Number of people) <sup>2</sup> | Obese population in 2005 (Number of people) <sup>3</sup> |
|---------------|-----------|------------------------------|--------------------------------------------------------------------|---------------------------------------------------------------|----------------------------------------------------------|
| Department 27 | 0-4       | 0.00440                      | 6473                                                               | 1387                                                          | 925                                                      |
|               | 5-9       | 0.00059                      | 7290                                                               | 911                                                           | 0                                                        |
|               | 10-14     | 0.00065                      | 5393                                                               | 2876                                                          | 719                                                      |
|               | 15-19     | 0.00136                      | 5762                                                               | 1372                                                          | 274                                                      |
|               | 20-24     | 0.00206                      | 3408                                                               | 1704                                                          | 1065                                                     |
|               | 25-29     | 0.00235                      | 2246                                                               | 1585                                                          | 793                                                      |
|               | 30-34     | 0.00185                      | 1493                                                               | 1149                                                          | 689                                                      |
|               | 35-39     | 0.00216                      | 910                                                                | 910                                                           | 1040                                                     |
|               | 40-44     | 0.00200                      | 446                                                                | 1227                                                          | 892                                                      |
|               | 45-49     | 0.00381                      | 230                                                                | 1035                                                          | 805                                                      |
|               | 50-54     | 0.00436                      | 260                                                                | 650                                                           | 650                                                      |
| 55-59         | 0.00591   | 173                          | 173                                                                | 604                                                           |                                                          |
| Department 52 | 0-4       | 0.00270                      | 14995                                                              | 4998                                                          | 1153                                                     |
|               | 5-9       | 0.00015                      | 20414                                                              | 4899                                                          | 0                                                        |
|               | 10-14     | 0.00019                      | 22968                                                              | 2964                                                          | 2223                                                     |
|               | 15-19     | 0.00074                      | 19852                                                              | 1752                                                          | 0                                                        |
|               | 20-24     | 0.00147                      | 12751                                                              | 3702                                                          | 411                                                      |
|               | 25-29     | 0.00133                      | 9694                                                               | 7616                                                          | 346                                                      |
|               | 30-34     | 0.00144                      | 6563                                                               | 9672                                                          | 1382                                                     |
|               | 35-39     | 0.00134                      | 5879                                                               | 5225                                                          | 2286                                                     |
|               | 40-44     | 0.00181                      | 3366                                                               | 5049                                                          | 4039                                                     |
|               | 45-49     | 0.00200                      | 1901                                                               | 2444                                                          | 3259                                                     |
|               | 50-54     | 0.00261                      | 2020                                                               | 3174                                                          | 2020                                                     |
| 55-59         | 0.00450   | 1287                         | 2573                                                               | 3088                                                          |                                                          |
| Department 76 | 0-4       | 0.00269                      | 71699                                                              | 15684                                                         | 5041                                                     |
|               | 5-9       | 0.00025                      | 84126                                                              | 8294                                                          | 2370                                                     |
|               | 10-14     | 0.00035                      | 87679                                                              | 9026                                                          | 10315                                                    |
|               | 15-19     | 0.00196                      | 81134                                                              | 6381                                                          | 1823                                                     |
|               | 20-24     | 0.00299                      | 75309                                                              | 19849                                                         | 3503                                                     |
|               | 25-29     | 0.00317                      | 56367                                                              | 21213                                                         | 10304                                                    |
|               | 30-34     | 0.00298                      | 37249                                                              | 23650                                                         | 13599                                                    |
|               | 35-39     | 0.00280                      | 33793                                                              | 24229                                                         | 10839                                                    |
|               | 40-44     | 0.00298                      | 28006                                                              | 23744                                                         | 14003                                                    |
|               | 45-49     | 0.00373                      | 16869                                                              | 20617                                                         | 10621                                                    |
|               | 50-54     | 0.00562                      | 15525                                                              | 18530                                                         | 6511                                                     |
| 55-59         | 0.00749   | 5056                         | 11376                                                              | 9480                                                          |                                                          |

† Values used in this table are for the urban population

1 Initial value used in the stock of not-overweight population in 2005 for middle SES.

2 Initial value used in the stock of overweight population in 2005 for middle SES.

3 Initial value used in the stock of obese population in 2005 for middle SES.



**Table 112. Mortality rates and population size by age group at the department level for the higher socioeconomic status population (Pacifica region) <sup>†</sup>**

| Departments   | Age group | Mortality rates (R) (%/year) | Not- overweight population in 2005 (Number of people) <sup>1</sup> | Overweight population in 2005 (Number of people) <sup>2</sup> | Obese population in 2005 (Number of people) <sup>3</sup> |
|---------------|-----------|------------------------------|--------------------------------------------------------------------|---------------------------------------------------------------|----------------------------------------------------------|
| Department 19 | 0-4       | 0.00309                      | 8023                                                               | 4011                                                          | 669                                                      |
|               | 5-9       | 0.00028                      | 12625                                                              | 2525                                                          | 1894                                                     |
|               | 10-14     | 0.00024                      | 12359                                                              | 2602                                                          | 650                                                      |
|               | 15-19     | 0.00181                      | 15988                                                              | 4290                                                          | 780                                                      |
|               | 20-24     | 0.00250                      | 16791                                                              | 4264                                                          | 267                                                      |
|               | 25-29     | 0.00302                      | 12214                                                              | 2748                                                          | 916                                                      |
|               | 30-34     | 0.00294                      | 5678                                                               | 4416                                                          | 631                                                      |
|               | 35-39     | 0.00275                      | 6428                                                               | 4628                                                          | 2057                                                     |
|               | 40-44     | 0.00321                      | 6412                                                               | 5855                                                          | 1115                                                     |
|               | 45-49     | 0.00387                      | 2931                                                               | 5210                                                          | 3582                                                     |
|               | 50-54     | 0.00425                      | 3056                                                               | 4232                                                          | 2586                                                     |
| Department 52 | 55-59     | 0.00776                      | 2093                                                               | 3349                                                          | 1675                                                     |
|               | 0-4       | 0.00270                      | 21147                                                              | 4614                                                          | 1153                                                     |
|               | 5-9       | 0.00015                      | 17964                                                              | 5716                                                          | 2450                                                     |
|               | 10-14     | 0.00019                      | 17781                                                              | 3704                                                          | 741                                                      |
|               | 15-19     | 0.00074                      | 23939                                                              | 4671                                                          | 1168                                                     |
|               | 20-24     | 0.00147                      | 30849                                                              | 7404                                                          | 1234                                                     |
|               | 25-29     | 0.00133                      | 14194                                                              | 10040                                                         | 1731                                                     |
|               | 30-34     | 0.00144                      | 9672                                                               | 8981                                                          | 2763                                                     |
|               | 35-39     | 0.00134                      | 7512                                                               | 14370                                                         | 1960                                                     |
|               | 40-44     | 0.00181                      | 6395                                                               | 11444                                                         | 3366                                                     |
|               | 45-49     | 0.00200                      | 4346                                                               | 8419                                                          | 7605                                                     |
| Department 76 | 50-54     | 0.00261                      | 5483                                                               | 6926                                                          | 4906                                                     |
|               | 55-59     | 0.00450                      | 2058                                                               | 4889                                                          | 5146                                                     |
|               | 0-4       | 0.00269                      | 108668                                                             | 25207                                                         | 9522                                                     |
|               | 5-9       | 0.00025                      | 133891                                                             | 29622                                                         | 17773                                                    |
|               | 10-14     | 0.00035                      | 136676                                                             | 21920                                                         | 10315                                                    |
|               | 15-19     | 0.00196                      | 144947                                                             | 35553                                                         | 5470                                                     |
|               | 20-24     | 0.00299                      | 131937                                                             | 28022                                                         | 8173                                                     |
|               | 25-29     | 0.00317                      | 94551                                                              | 44851                                                         | 16971                                                    |
|               | 30-34     | 0.00298                      | 80410                                                              | 48482                                                         | 24832                                                    |
|               | 35-39     | 0.00280                      | 64399                                                              | 65674                                                         | 28693                                                    |
|               | 40-44     | 0.00298                      | 46271                                                              | 69406                                                         | 32877                                                    |
| 45-49         | 0.00373   | 38735                        | 68724                                                              | 31863                                                         |                                                          |
| 50-54         | 0.00562   | 32052                        | 49080                                                              | 30049                                                         |                                                          |
| 55-59         | 0.00749   | 28441                        | 37289                                                              | 24017                                                         |                                                          |

<sup>†</sup>Values used in this table are for the urban population

<sup>1</sup> Initial value used in the stock of not-overweight population in 2005 for higher SES.

<sup>2</sup> Initial value used in the stock of overweight population in 2005 for higher SES.

<sup>3</sup> Initial value used in the stock of obese population in 2005 for higher SES.

## 1.5 Bogotá

### 1.5.1 Data and model parameters used

**Table 113. Prevalent rates of entire population by age group, sex, and body mass index category in 2005 (Bogotá)**

| Age Group | Nutritional State Male |           |         | Nutritional State Female |           |         |
|-----------|------------------------|-----------|---------|--------------------------|-----------|---------|
|           | Not-Overweigh          | Overweigh | Obese   | Not-Overweigh            | Overweigh | Obese   |
| 0-4       | 0.73188                | 0.21377   | 0.05435 | 0.74203                  | 0.20580   | 0.05217 |
| 5-9       | 0.82781                | 0.13245   | 0.03974 | 0.74675                  | 0.20779   | 0.04545 |
| 10-14     | 0.81197                | 0.13675   | 0.05128 | 0.82313                  | 0.16327   | 0.01361 |
| 15-19     | 0.89051                | 0.10219   | 0.00730 | 0.77340                  | 0.20197   | 0.02463 |
| 20-24     | 0.81780                | 0.14407   | 0.03814 | 0.71429                  | 0.24490   | 0.04082 |
| 25-29     | 0.67164                | 0.29851   | 0.02985 | 0.64537                  | 0.28435   | 0.07029 |
| 30-34     | 0.58599                | 0.36306   | 0.05096 | 0.54198                  | 0.32443   | 0.13359 |
| 35-39     | 0.50365                | 0.38686   | 0.10949 | 0.43798                  | 0.36822   | 0.19380 |
| 40-44     | 0.43511                | 0.44275   | 0.12214 | 0.38956                  | 0.42169   | 0.18876 |
| 45-49     | 0.35433                | 0.52756   | 0.11811 | 0.24180                  | 0.49180   | 0.26639 |
| 50-54     | 0.35000                | 0.46000   | 0.19000 | 0.22632                  | 0.43158   | 0.34211 |
| 55-59     | 0.41026                | 0.46154   | 0.12821 | 0.24800                  | 0.37600   | 0.37600 |

**Table 114. Prevalent rates of lower socioeconomic status population by age group, sex, and body mass index category in 2005 (Bogotá)**

| Age Group | Nutritional State Male |           |         | Nutritional State Female |           |         |
|-----------|------------------------|-----------|---------|--------------------------|-----------|---------|
|           | Not-Overweigh          | Overweigh | Obese   | Not-Overweigh            | Overweigh | Obese   |
| 0-4       | 0.68519                | 0.24074   | 0.07407 | 0.72727                  | 0.22727   | 0.04545 |
| 5-9       | 1.00000                | 0.00000   | 0.00000 | 0.64706                  | 0.29412   | 0.05882 |
| 10-14     | 1.00000                | 0.00000   | 0.00000 | 1.00000                  | 0.00000   | 0.00000 |
| 15-19     | 1.00000                | 0.00000   | 0.00000 | 0.76923                  | 0.23077   | 0.00000 |
| 20-24     | 0.82759                | 0.17241   | 0.00000 | 0.78846                  | 0.21154   | 0.00000 |
| 25-29     | 0.73077                | 0.23077   | 0.03846 | 0.58621                  | 0.31034   | 0.10345 |
| 30-34     | 0.46154                | 0.53846   | 0.00000 | 0.54167                  | 0.33333   | 0.12500 |
| 35-39     | 0.57143                | 0.35714   | 0.07143 | 0.41176                  | 0.38235   | 0.20588 |
| 40-44     | 0.64286                | 0.21429   | 0.14286 | 0.25000                  | 0.58333   | 0.16667 |
| 45-49     | 0.55556                | 0.44444   | 0.00000 | 0.52632                  | 0.36842   | 0.10526 |
| 50-54     | 0.58333                | 0.33333   | 0.08333 | 0.28571                  | 0.28571   | 0.42857 |
| 55-59     | 0.50000                | 0.00000   | 0.50000 | 0.50000                  | 0.50000   | 0.00000 |

**Table 115. Prevalent rates of middle socioeconomic status population by age group, sex, and body mass index category in 2005 (Bogotá)**

| Age Group | Nutritional State Male |           |         | Nutritional State Female |           |         |
|-----------|------------------------|-----------|---------|--------------------------|-----------|---------|
|           | Not-Overweigh          | Overweigh | Obese   | Not-Overweigh            | Overweigh | Obese   |
| 0-4       | 0.76623                | 0.19481   | 0.03896 | 0.72477                  | 0.22936   | 0.04587 |
| 5-9       | 0.83333                | 0.14286   | 0.02381 | 0.73529                  | 0.23529   | 0.02941 |
| 10-14     | 0.87500                | 0.12500   | 0.00000 | 0.75000                  | 0.22500   | 0.02500 |

|       |         |         |         |         |         |         |
|-------|---------|---------|---------|---------|---------|---------|
| 15-19 | 0.93333 | 0.06667 | 0.00000 | 0.64583 | 0.29167 | 0.06250 |
| 20-24 | 0.83333 | 0.11111 | 0.05556 | 0.67073 | 0.26829 | 0.06098 |
| 25-29 | 0.68182 | 0.31818 | 0.00000 | 0.60000 | 0.33684 | 0.06316 |
| 30-34 | 0.69697 | 0.30303 | 0.00000 | 0.58929 | 0.32143 | 0.08929 |
| 35-39 | 0.51852 | 0.29630 | 0.18519 | 0.42623 | 0.40984 | 0.16393 |
| 40-44 | 0.66667 | 0.29630 | 0.03704 | 0.44444 | 0.53333 | 0.02222 |
| 45-49 | 0.30769 | 0.46154 | 0.23077 | 0.22222 | 0.46667 | 0.31111 |
| 50-54 | 0.35714 | 0.50000 | 0.14286 | 0.15385 | 0.33333 | 0.51282 |
| 55-59 | 0.38462 | 0.46154 | 0.15385 | 0.36364 | 0.36364 | 0.27273 |

**Table 116. Prevalent rates of higher socioeconomic status population by age group, sex, and body mass index category in 2005 (Bogotá)**

| Age Group | Nutritional State Male |           |         | Nutritional State Female |           |         |
|-----------|------------------------|-----------|---------|--------------------------|-----------|---------|
|           | Not-Overweigh          | Overweigh | Obese   | Not-Overweigh            | Overweigh | Obese   |
| 0-4       | 0.73103                | 0.21379   | 0.05517 | 0.75882                  | 0.18235   | 0.05882 |
| 5-9       | 0.79787                | 0.14894   | 0.05319 | 0.76699                  | 0.18447   | 0.04854 |
| 10-14     | 0.75000                | 0.16667   | 0.08333 | 0.83505                  | 0.15464   | 0.01031 |
| 15-19     | 0.85870                | 0.13043   | 0.01087 | 0.81690                  | 0.16901   | 0.01408 |
| 20-24     | 0.81046                | 0.15033   | 0.03922 | 0.71292                  | 0.24402   | 0.04306 |
| 25-29     | 0.65649                | 0.30534   | 0.03817 | 0.67725                  | 0.25397   | 0.06878 |
| 30-34     | 0.56757                | 0.36036   | 0.07207 | 0.52747                  | 0.32418   | 0.14835 |
| 35-39     | 0.48958                | 0.41667   | 0.09375 | 0.44785                  | 0.34969   | 0.20245 |
| 40-44     | 0.33333                | 0.52222   | 0.14444 | 0.38542                  | 0.38542   | 0.22917 |
| 45-49     | 0.34783                | 0.55435   | 0.09783 | 0.21667                  | 0.51111   | 0.27222 |
| 50-54     | 0.31081                | 0.47297   | 0.21622 | 0.24306                  | 0.46528   | 0.29167 |
| 55-59     | 0.41270                | 0.47619   | 0.11111 | 0.21782                  | 0.37624   | 0.40594 |

**Table 117. Prevalent rates of entire population by age group, sex, and body mass index category in 2010 (Bogotá)**

| Age Group | Nutritional State Male |           |         | Nutritional State Female |           |         |
|-----------|------------------------|-----------|---------|--------------------------|-----------|---------|
|           | Not-Overweigh          | Overweigh | Obese   | Not-Overweigh            | Overweigh | Obese   |
| 0-4       | 0.69499                | 0.23747   | 0.06754 | 0.72785                  | 0.21308   | 0.05907 |
| 5-9       | 0.72990                | 0.15876   | 0.11134 | 0.74215                  | 0.20404   | 0.05381 |
| 10-14     | 0.75618                | 0.18198   | 0.06184 | 0.75388                  | 0.21705   | 0.02907 |
| 15-19     | 0.88367                | 0.10067   | 0.01566 | 0.78835                  | 0.17476   | 0.03689 |
| 20-24     | 0.79200                | 0.17333   | 0.03467 | 0.72187                  | 0.22293   | 0.05520 |
| 25-29     | 0.61538                | 0.29808   | 0.08654 | 0.61483                  | 0.29426   | 0.09091 |
| 30-34     | 0.50996                | 0.39044   | 0.09960 | 0.53598                  | 0.36228   | 0.10174 |
| 35-39     | 0.45652                | 0.43841   | 0.10507 | 0.45340                  | 0.41310   | 0.13350 |
| 40-44     | 0.41107                | 0.45455   | 0.13439 | 0.36203                  | 0.45316   | 0.18481 |
| 45-49     | 0.33929                | 0.48214   | 0.17857 | 0.30296                  | 0.46925   | 0.22779 |
| 50-54     | 0.34197                | 0.49741   | 0.16062 | 0.27640                  | 0.48447   | 0.23913 |
| 55-59     | 0.30519                | 0.47403   | 0.22078 | 0.20248                  | 0.41322   | 0.38430 |

**Table 118. Prevalent rates of lower socioeconomic status population by age group, sex, and body mass index category in 2010 (Bogotá)**

| Age Group | Nutritional State Male |           |         | Nutritional State Female |           |         |
|-----------|------------------------|-----------|---------|--------------------------|-----------|---------|
|           | Not-Overweigh          | Overweigh | Obese   | Not-Overweigh            | Overweigh | Obese   |
| 0-4       | 0.56000                | 0.32000   | 0.12000 | 0.68966                  | 0.24138   | 0.06897 |
| 5-9       | 0.77419                | 0.19355   | 0.03226 | 0.84211                  | 0.15789   | 0.00000 |
| 10-14     | 0.94444                | 0.05556   | 0.00000 | 0.87500                  | 0.12500   | 0.00000 |
| 15-19     | 0.93750                | 0.06250   | 0.00000 | 0.84211                  | 0.10526   | 0.05263 |
| 20-24     | 0.86667                | 0.13333   | 0.00000 | 0.75000                  | 0.16667   | 0.08333 |
| 25-29     | 0.62500                | 0.37500   | 0.00000 | 0.68182                  | 0.18182   | 0.13636 |
| 30-34     | 0.90000                | 0.10000   | 0.00000 | 0.45455                  | 0.45455   | 0.09091 |
| 35-39     | 0.66667                | 0.33333   | 0.00000 | 0.54545                  | 0.18182   | 0.27273 |
| 40-44     | 0.40000                | 0.20000   | 0.40000 | 0.28571                  | 0.71429   | 0.00000 |
| 45-49     | 0.50000                | 0.37500   | 0.12500 | 0.23077                  | 0.38462   | 0.38462 |
| 50-54     | 0.71429                | 0.28571   | 0.00000 | 1.00000                  | 0.00000   | 0.00000 |
| 55-59     | 0.50000                | 0.50000   | 0.00000 | 0.00000                  | 0.40000   | 0.60000 |

**Table 119. Prevalent rates of middle socioeconomic status population by age group, sex, and body mass index category in 2010 (Bogotá)**

| Age Group | Nutritional State Male |           |         | Nutritional State Female |           |         |
|-----------|------------------------|-----------|---------|--------------------------|-----------|---------|
|           | Not- Overweigh         | Overweigh | Obese   | Not-Overweigh            | Overweigh | Obese   |
| 0-4       | 0.69925                | 0.23308   | 0.06767 | 0.81746                  | 0.11905   | 0.06349 |
| 5-9       | 0.75258                | 0.11340   | 0.13402 | 0.76724                  | 0.18966   | 0.04310 |
| 10-14     | 0.81301                | 0.16260   | 0.02439 | 0.78788                  | 0.18182   | 0.03030 |
| 15-19     | 0.94203                | 0.04348   | 0.01449 | 0.75000                  | 0.24107   | 0.00893 |
| 20-24     | 0.82278                | 0.13924   | 0.03797 | 0.71963                  | 0.22430   | 0.05607 |
| 25-29     | 0.72941                | 0.20000   | 0.07059 | 0.53846                  | 0.37363   | 0.08791 |
| 30-34     | 0.57143                | 0.38776   | 0.04082 | 0.51250                  | 0.37500   | 0.11250 |
| 35-39     | 0.51923                | 0.42308   | 0.05769 | 0.48438                  | 0.34375   | 0.17188 |
| 40-44     | 0.48980                | 0.42857   | 0.08163 | 0.32394                  | 0.43662   | 0.23944 |
| 45-49     | 0.53125                | 0.34375   | 0.12500 | 0.38806                  | 0.40299   | 0.20896 |
| 50-54     | 0.36364                | 0.48485   | 0.15152 | 0.28947                  | 0.47368   | 0.23684 |
| 55-59     | 0.33333                | 0.52381   | 0.14286 | 0.21429                  | 0.21429   | 0.57143 |

**Table 120. Prevalent rates of higher socioeconomic status population by age group, sex, and body mass index category in 2010 (Bogotá)**

| Age Group | Nutritional State Male |           |         | Nutritional State Female |           |         |
|-----------|------------------------|-----------|---------|--------------------------|-----------|---------|
|           | Not-Overweigh          | Overweigh | Obese   | Not-Overweigh            | Overweigh | Obese   |
| 0-4       | 0.70432                | 0.23256   | 0.06312 | 0.69592                  | 0.24765   | 0.05643 |
| 5-9       | 0.71989                | 0.16807   | 0.11204 | 0.72669                  | 0.21222   | 0.06109 |
| 10-14     | 0.73176                | 0.19294   | 0.07529 | 0.73333                  | 0.23611   | 0.03056 |
| 15-19     | 0.87017                | 0.11326   | 0.01657 | 0.79688                  | 0.15885   | 0.04427 |
| 20-24     | 0.77936                | 0.18505   | 0.03559 | 0.72059                  | 0.22647   | 0.05294 |
| 25-29     | 0.57078                | 0.33333   | 0.09589 | 0.63279                  | 0.27869   | 0.08852 |
| 30-34     | 0.47396                | 0.40625   | 0.11979 | 0.54487                  | 0.35577   | 0.09936 |
| 35-39     | 0.43578                | 0.44495   | 0.11927 | 0.44410                  | 0.43478   | 0.12112 |
| 40-44     | 0.39196                | 0.46734   | 0.14070 | 0.37224                  | 0.45110   | 0.17666 |
| 45-49     | 0.29891                | 0.51087   | 0.19022 | 0.28969                  | 0.48468   | 0.22563 |
| 50-54     | 0.32026                | 0.50980   | 0.16993 | 0.26950                  | 0.48936   | 0.24113 |

|       |         |         |         |         |         |         |
|-------|---------|---------|---------|---------|---------|---------|
| 55-59 | 0.29771 | 0.46565 | 0.23664 | 0.20574 | 0.44019 | 0.35407 |
|-------|---------|---------|---------|---------|---------|---------|

**Table 121. Fraction of births for men by body mass index category, and socioeconomic status (Bogotá)†**

| Population group | Lower SES (%/year) | Middle SES (%/year) | Higher SES (%/year) | Complete Urban Population (%/year) |
|------------------|--------------------|---------------------|---------------------|------------------------------------|
| Not- overweight  | 50,00%             | 77,27%              | 78,57%              | 73,33%                             |
| Overweight       | 40,00%             | 13,64%              | 14,29%              | 18,33%                             |
| Obese            | 10,00%             | 9,09%               | 7,14%               | 8,33%                              |

† The fractions of births by each BMI category correspond to the prevalences by BMI category of children aged 0 to 12 months

**Table 122. Fraction of births for women by body mass index category and socioeconomic status (Bogotá)†**

| Population group | Lower SES (%/year) | Middle SES (%/year) | Higher SES (%/year) | Complete Urban Population (%/year) |
|------------------|--------------------|---------------------|---------------------|------------------------------------|
| Not- overweight  | 63,64%             | 81,25%              | 83,72%              | 80,00%                             |
| Overweight       | 18,18%             | 18,75%              | 11,63%              | 14,29%                             |
| Obese            | 18,18%             | 0,00%               | 4,65%               | 5,71%                              |

† The fractions of births by each BMI category correspond to the prevalences by BMI category of children aged 0 to 12 months

**Table 123. Mortality rates for men and population size by age group without segregate by socioeconomic status (Bogotá)†**

| Age group | Mortality rates (R) (%/year) | Not- overweight men in 2005 (Number of people)1 | Overweight men in 2005 (Number of people)2 | Obese men in 2005 (Number of people)3 |
|-----------|------------------------------|-------------------------------------------------|--------------------------------------------|---------------------------------------|
| 0-4       | 0.00307                      | 221907                                          | 64814                                      | 16478                                 |
| 5-9       | 0.00033                      | 262469                                          | 41995                                      | 12599                                 |
| 10-14     | 0.00038                      | 263573                                          | 44391                                      | 16647                                 |
| 15-19     | 0.00275                      | 273307                                          | 31363                                      | 2240                                  |
| 20-24     | 0.00451                      | 251792                                          | 44357                                      | 11742                                 |
| 25-29     | 0.00478                      | 196181                                          | 87192                                      | 8719                                  |
| 30-34     | 0.00447                      | 150111                                          | 93004                                      | 13053                                 |
| 35-39     | 0.00378                      | 123651                                          | 94978                                      | 26881                                 |
| 40-44     | 0.00398                      | 100731                                          | 102498                                     | 28275                                 |
| 45-49     | 0.00447                      | 67880                                           | 101066                                     | 22627                                 |
| 50-54     | 0.00621                      | 52065                                           | 68428                                      | 28264                                 |
| 55-59     | 0.00823                      | 47031                                           | 52910                                      | 14697                                 |

†Values used in this table are for the urban population

<sup>1</sup> Initial value used in the stock of not-overweight population in 2005.

<sup>2</sup> Initial value used in the stock of overweight population in 2005.

<sup>3</sup> Initial value used in the stock of obese population in 2005.

**Table 124. Mortality rates for women and population size by age group without segregate by socioeconomic status (Bogotá)†**

| Age group | Mortality rates (R) (%/year) | Not- overweight women in 2005 (Number of people)1 | Overweight women in 2005 (Number of people)2 | Obese women in 2005 (Number of people)3 |
|-----------|------------------------------|---------------------------------------------------|----------------------------------------------|-----------------------------------------|
| 0-4       | 0.00252                      | 215154                                            | 59672                                        | 15128                                   |
| 5-9       | 0.00019                      | 227389                                            | 63274                                        | 13841                                   |

|       |         |        |        |       |
|-------|---------|--------|--------|-------|
| 10-14 | 0.00028 | 256595 | 50895  | 4241  |
| 15-19 | 0.00059 | 231695 | 60506  | 7379  |
| 20-24 | 0.00085 | 239490 | 82111  | 13685 |
| 25-29 | 0.00095 | 205086 | 90359  | 22336 |
| 30-34 | 0.00101 | 151898 | 90925  | 37440 |
| 35-39 | 0.00132 | 120719 | 101489 | 53415 |
| 40-44 | 0.00157 | 103922 | 112493 | 50354 |
| 45-49 | 0.00235 | 54921  | 111704 | 60506 |
| 50-54 | 0.00354 | 40398  | 77037  | 61066 |
| 55-59 | 0.00526 | 34180  | 51821  | 51821 |

†Values used in this table are for the urban population

<sup>1</sup> Initial value used in the stock of not-overweight population in 2005.

<sup>2</sup> Initial value used in the stock of overweight population in 2005.

<sup>3</sup> Initial value used in the stock of obese population in 2005.

**Table 125. Man mortality rates and population size by age group for the lower socioeconomic status population (Bogotá) †**

| Age group | Mortality rates (R) (%/year) | Not- overweight men in 2005 (Number of people) <sup>1</sup> | Overweight men in 2005 (Number of people) <sup>2</sup> | Obese men in 2005 (Number of people) <sup>3</sup> |
|-----------|------------------------------|-------------------------------------------------------------|--------------------------------------------------------|---------------------------------------------------|
| 0-4       | 0.00307                      | 40646                                                       | 14281                                                  | 4394                                              |
| 5-9       | 0.00033                      | 31496                                                       | 0                                                      | 0                                                 |
| 10-14     | 0.00038                      | 36068                                                       | 0                                                      | 0                                                 |
| 15-19     | 0.00275                      | 33603                                                       | 0                                                      | 0                                                 |
| 20-24     | 0.00451                      | 31311                                                       | 6523                                                   | 0                                                 |
| 25-29     | 0.00478                      | 27611                                                       | 8719                                                   | 1453                                              |
| 30-34     | 0.00447                      | 9790                                                        | 11422                                                  | 0                                                 |
| 35-39     | 0.00378                      | 14336                                                       | 8960                                                   | 1792                                              |
| 40-44     | 0.00398                      | 15905                                                       | 5302                                                   | 3534                                              |
| 45-49     | 0.00447                      | 7542                                                        | 6034                                                   | 0                                                 |
| 50-54     | 0.00621                      | 10413                                                       | 5950                                                   | 1488                                              |
| 55-59     | 0.00823                      | 1470                                                        | 0                                                      | 1470                                              |

†Values used in this table are for the urban population

<sup>1</sup> Initial value used in the stock of not-overweight population in 2005 for lower SES.

<sup>2</sup> Initial value used in the stock of overweight population in 2005 for lower SES.

<sup>3</sup> Initial value used in the stock of obese population in 2005 for lower SES.

**Table 126. Women mortality rates and population size by age group for the lower socioeconomic status population (Bogotá) †**

| Age group | Mortality rates (R) (%/year) | Not- overweight women in 2005 (Number of people) <sup>1</sup> | Overweight women in 2005 (Number of people) <sup>2</sup> | Obese women in 2005 (Number of people) <sup>3</sup> |
|-----------|------------------------------|---------------------------------------------------------------|----------------------------------------------------------|-----------------------------------------------------|
| 0-4       | 0.00252                      | 41258                                                         | 12893                                                    | 2579                                                |
| 5-9       | 0.00019                      | 19573                                                         | 8897                                                     | 1779                                                |
| 10-14     | 0.00028                      | 34637                                                         | 0                                                        | 0                                                   |
| 15-19     | 0.00059                      | 25231                                                         | 7569                                                     | 0                                                   |
| 20-24     | 0.00085                      | 32485                                                         | 8715                                                     | 0                                                   |
| 25-29     | 0.00095                      | 24097                                                         | 12757                                                    | 4252                                                |
| 30-34     | 0.00101                      | 12570                                                         | 7735                                                     | 2901                                                |
| 35-39     | 0.00132                      | 11598                                                         | 10769                                                    | 5799                                                |
| 40-44     | 0.00157                      | 7127                                                          | 16631                                                    | 4752                                                |
| 45-49     | 0.00235                      | 8472                                                          | 5930                                                     | 1694                                                |
| 50-54     | 0.00354                      | 6120                                                          | 6120                                                     | 9180                                                |
| 55-59     | 0.00526                      | 1767                                                          | 1767                                                     | 0                                                   |

†Values used in this table are for the urban population

<sup>1</sup> Initial value used in the stock of not-overweight population in 2005 for lower SES.

<sup>2</sup> Initial value used in the stock of overweight population in 2005 for lower SES.

<sup>3</sup> Initial value used in the stock of obese population in 2005 for lower SES.

**Table 127. Man mortality rates and population size by age group for the middle socioeconomic status population (Bogotá) †**

| Age group | Mortality rates (R) (%/year) | Not- overweight men in 2005 (Number of people) <sup>1</sup> | Overweight men in 2005 (Number of people) <sup>2</sup> | Obese men in 2005 (Number of people) <sup>3</sup> |
|-----------|------------------------------|-------------------------------------------------------------|--------------------------------------------------------|---------------------------------------------------|
| 0-4       | 0.00307                      | 64814                                                       | 16478                                                  | 3296                                              |
| 5-9       | 0.00033                      | 73491                                                       | 12599                                                  | 2100                                              |
| 10-14     | 0.00038                      | 77685                                                       | 11098                                                  | 0                                                 |
| 15-19     | 0.00275                      | 62726                                                       | 4480                                                   | 0                                                 |
| 20-24     | 0.00451                      | 58708                                                       | 7828                                                   | 3914                                              |
| 25-29     | 0.00478                      | 43596                                                       | 20345                                                  | 0                                                 |
| 30-34     | 0.00447                      | 37528                                                       | 16316                                                  | 0                                                 |
| 35-39     | 0.00378                      | 25089                                                       | 14336                                                  | 8960                                              |
| 40-44     | 0.00398                      | 31810                                                       | 14138                                                  | 1767                                              |
| 45-49     | 0.00447                      | 12068                                                       | 18101                                                  | 9051                                              |
| 50-54     | 0.00621                      | 7438                                                        | 10413                                                  | 2975                                              |
| 55-59     | 0.00823                      | 7349                                                        | 8818                                                   | 2939                                              |

†Values used in this table are for the urban population

<sup>1</sup> Initial value used in the stock of not-overweight population in 2005 for middle SES.

<sup>2</sup> Initial value used in the stock of overweight population in 2005 for middle SES.

<sup>3</sup> Initial value used in the stock of obese population in 2005 for middle SES.

**Table 128. Women mortality rates and population size by age group for the middle socioeconomic status population (Bogotá) †**

| Age group | Mortality rates (R) (%/year) | Not- overweight women in 2005 (Number of people) <sup>1</sup> | Overweight women in 2005 (Number of people) <sup>2</sup> | Obese women in 2005 (Number of people) <sup>3</sup> |
|-----------|------------------------------|---------------------------------------------------------------|----------------------------------------------------------|-----------------------------------------------------|
| 0-4       | 0.00252                      | 58629                                                         | 18553                                                    | 3711                                                |
| 5-9       | 0.00019                      | 62277                                                         | 19929                                                    | 2491                                                |
| 10-14     | 0.00028                      | 63945                                                         | 19183                                                    | 2131                                                |
| 15-19     | 0.00059                      | 42368                                                         | 19134                                                    | 4100                                                |
| 20-24     | 0.00085                      | 51457                                                         | 20583                                                    | 4678                                                |
| 25-29     | 0.00095                      | 41738                                                         | 23432                                                    | 4394                                                |
| 30-34     | 0.00101                      | 34714                                                         | 18935                                                    | 5260                                                |
| 35-39     | 0.00132                      | 23153                                                         | 22262                                                    | 8905                                                |
| 40-44     | 0.00157                      | 24437                                                         | 29324                                                    | 1222                                                |
| 45-49     | 0.00235                      | 10333                                                         | 21700                                                    | 14466                                               |
| 50-54     | 0.00354                      | 3845                                                          | 8330                                                     | 12815                                               |
| 55-59     | 0.00526                      | 8353                                                          | 8353                                                     | 6265                                                |

†Values used in this table are for the urban population

<sup>1</sup> Initial value used in the stock of not-overweight population in 2005 for middle SES.

<sup>2</sup> Initial value used in the stock of overweight population in 2005 for middle SES.

<sup>3</sup> Initial value used in the stock of obese population in 2005 for middle SES.

**Table 129. Man mortality rates and population size by age group for the higher socioeconomic status population (Bogotá) †**

| Age group | Mortality rates (R) (%/year) | Not- overweight men in 2005 (Number of people) <sup>1</sup> | Overweight men in 2005 (Number of people) <sup>2</sup> | Obese men in 2005 (Number of people) <sup>3</sup> |
|-----------|------------------------------|-------------------------------------------------------------|--------------------------------------------------------|---------------------------------------------------|
|-----------|------------------------------|-------------------------------------------------------------|--------------------------------------------------------|---------------------------------------------------|

|       |         |        |       |       |
|-------|---------|--------|-------|-------|
| 0-4   | 0.00307 | 116446 | 34055 | 8788  |
| 5-9   | 0.00033 | 157482 | 29397 | 10499 |
| 10-14 | 0.00038 | 149820 | 33293 | 16647 |
| 15-19 | 0.00275 | 176977 | 26883 | 2240  |
| 20-24 | 0.00451 | 161773 | 30006 | 7828  |
| 25-29 | 0.00478 | 124975 | 58128 | 7266  |
| 30-34 | 0.00447 | 102794 | 65266 | 13053 |
| 35-39 | 0.00378 | 84226  | 71682 | 16128 |
| 40-44 | 0.00398 | 53016  | 83059 | 22974 |
| 45-49 | 0.00447 | 48270  | 76931 | 13576 |
| 50-54 | 0.00621 | 34214  | 52065 | 23801 |
| 55-59 | 0.00823 | 38213  | 44092 | 10288 |

†Values used in this table are for the urban population

<sup>1</sup> Initial value used in the stock of not-overweight population in 2005 for higher SES.

<sup>2</sup> Initial value used in the stock of overweight population in 2005 for higher SES.

<sup>3</sup> Initial value used in the stock of obese population in 2005 for higher SES.

**Table 130. Women mortality rates and population size by age group for the higher socioeconomic status population (Bogotá) †**

| Age group | Mortality rates (R) (%/year) | Not- overweight women in 2005 (Number of people) <sup>1</sup> | Overweight women in 2005 (Number of people) <sup>2</sup> | Obese women in 2005 (Number of people) <sup>3</sup> |
|-----------|------------------------------|---------------------------------------------------------------|----------------------------------------------------------|-----------------------------------------------------|
| 0-4       | 0.00252                      | 115592                                                        | 27778                                                    | 8961                                                |
| 5-9       | 0.00019                      | 145390                                                        | 34967                                                    | 9202                                                |
| 10-14     | 0.00028                      | 160192                                                        | 29665                                                    | 1978                                                |
| 15-19     | 0.00059                      | 164342                                                        | 34002                                                    | 2833                                                |
| 20-24     | 0.00085                      | 154965                                                        | 53042                                                    | 9360                                                |
| 25-29     | 0.00095                      | 140266                                                        | 52600                                                    | 14246                                               |
| 30-34     | 0.00101                      | 104517                                                        | 64235                                                    | 29396                                               |
| 35-39     | 0.00132                      | 86497                                                         | 67539                                                    | 39101                                               |
| 40-44     | 0.00157                      | 70638                                                         | 70638                                                    | 42001                                               |
| 45-49     | 0.00235                      | 35649                                                         | 84096                                                    | 44790                                               |
| 50-54     | 0.00354                      | 32105                                                         | 61459                                                    | 38526                                               |
| 55-59     | 0.00526                      | 24247                                                         | 41882                                                    | 45188                                               |

†Values used in this table are for the urban population

<sup>1</sup> Initial value used in the stock of not-overweight population in 2005 for higher SES.

<sup>2</sup> Initial value used in the stock of overweight population in 2005 for higher SES.

<sup>3</sup> Initial value used in the stock of obese population in 2005 for higher SES.

**Table 131. Data and projections of the Fertility rates (Bogotá) †**

| Year | Average Region Fecundity Rate | Year | Average Region Fecundity Rate | Year | Average Region Fecundity Rate |
|------|-------------------------------|------|-------------------------------|------|-------------------------------|
| 2005 | 1,985                         | 2014 | 1,908                         | 2023 | 1,896                         |
| 2006 | 1,968                         | 2015 | 1,907                         | 2024 | 1,894                         |
| 2007 | 1,951                         | 2016 | 1,905                         | 2025 | 1,893                         |
| 2008 | 1,934                         | 2017 | 1,904                         | 2026 | 1,891                         |
| 2009 | 1,929                         | 2018 | 1,903                         | 2027 | 1,890                         |
| 2010 | 1,924                         | 2019 | 1,901                         | 2028 | 1,889                         |
| 2011 | 1,919                         | 2020 | 1,900                         | 2029 | 1,887                         |
| 2012 | 1,914                         | 2021 | 1,898                         | 2030 | 1,886                         |
| 2013 | 1,910                         | 2022 | 1,897                         |      |                               |

† Data of Fertility rate of DANE [1] was used to forecast the fertility rate from 2005 to 2030. Holt-Winters non seasonal method in EViews 5 (Quantitative Micro Software, LLC) was used to forecast the fertility rate. In the SD model we used data from 2005 to 2030.



## 1.6 Orinoquia y Amazonia region

The Orinoquia y Amazonia region of Colombia is located in the south of the national territory and consists of eight departments, these are:

- Arauca (81)
- Casanare (85)
- Putumayo (86)
- Amazonas (91)
- Guainía (94)
- Guaviare (95)
- Vaupés (97)
- Vichada (99)

### 1.6.1 Data and model parameters used

**Table 132. Prevalent rates of entire population by age group, sex, and body mass index category in 2005 (Orinoquia y Amazonia region)**

| Age Group | Nutritional State Male |           |         | Nutritional State Female |           |         |
|-----------|------------------------|-----------|---------|--------------------------|-----------|---------|
|           | Not-Overweigh          | Overweigh | Obese   | Not-Overweigh            | Overweigh | Obese   |
| 0-4       | 0.78618                | 0.17171   | 0.04212 | 0.79330                  | 0.17207   | 0.03464 |
| 5-9       | 0.79037                | 0.15615   | 0.05348 | 0.83559                  | 0.13007   | 0.03434 |
| 10-14     | 0.81679                | 0.13959   | 0.04362 | 0.78942                  | 0.16667   | 0.04391 |
| 15-19     | 0.86639                | 0.10127   | 0.03235 | 0.75000                  | 0.20668   | 0.04332 |
| 20-24     | 0.71508                | 0.22533   | 0.05959 | 0.68852                  | 0.21816   | 0.09332 |
| 25-29     | 0.57197                | 0.33523   | 0.09280 | 0.59781                  | 0.27770   | 0.12449 |
| 30-34     | 0.42664                | 0.43341   | 0.13995 | 0.47958                  | 0.33434   | 0.18608 |
| 35-39     | 0.37275                | 0.44473   | 0.18252 | 0.34647                  | 0.40230   | 0.25123 |
| 40-44     | 0.35529                | 0.44706   | 0.19765 | 0.32513                  | 0.42004   | 0.25483 |
| 45-49     | 0.34270                | 0.43539   | 0.22191 | 0.26588                  | 0.42118   | 0.31294 |
| 50-54     | 0.33108                | 0.47635   | 0.19257 | 0.22188                  | 0.44681   | 0.33131 |
| 55-59     | 0.33333                | 0.41243   | 0.25424 | 0.24409                  | 0.37795   | 0.37795 |

**Table 133. Prevalent rates of lower socioeconomic status population by age group, sex, and body mass index category in 2005 (Orinoquia y Amazonia region)**

**Table 134. Prevalent rates of middle socioeconomic status population by age group, sex, and body mass index category in 2005 (Orinoquia y Amazonia region)**

| Age Group | Nutritional State Male |           |         | Nutritional State Female |           |         |
|-----------|------------------------|-----------|---------|--------------------------|-----------|---------|
|           | Not-Overweigh          | Overweigh | Obese   | Not-Overweigh            | Overweigh | Obese   |
| 0-4       | 0.74672                | 0.20524   | 0.04803 | 0.83920                  | 0.13568   | 0.02513 |
| 5-9       | 0.78667                | 0.15111   | 0.06222 | 0.79079                  | 0.14644   | 0.06276 |
| 10-14     | 0.76652                | 0.17181   | 0.06167 | 0.77459                  | 0.15574   | 0.06967 |
| 15-19     | 0.84242                | 0.12727   | 0.03030 | 0.74747                  | 0.20707   | 0.04545 |

| Age Group | Nutritional State Male |           |         | Nutritional State Female |           |         |
|-----------|------------------------|-----------|---------|--------------------------|-----------|---------|
|           | Not-Overweigh          | Overweigh | Obese   | Not-Overweigh            | Overweigh | Obese   |
| 0-4       | 0.81146                | 0.14972   | 0.03882 | 0.78246                  | 0.18421   | 0.03333 |
| 5-9       | 0.82648                | 0.14132   | 0.03220 | 0.87674                  | 0.10764   | 0.01563 |
| 10-14     | 0.85199                | 0.12334   | 0.02467 | 0.82011                  | 0.15344   | 0.02646 |
| 15-19     | 0.90226                | 0.07519   | 0.02256 | 0.73933                  | 0.22472   | 0.03596 |
| 20-24     | 0.76656                | 0.18612   | 0.04732 | 0.68396                  | 0.23113   | 0.08491 |
| 25-29     | 0.64639                | 0.30038   | 0.05323 | 0.54913                  | 0.30925   | 0.14162 |
| 30-34     | 0.49558                | 0.41150   | 0.09292 | 0.48882                  | 0.31949   | 0.19169 |
| 35-39     | 0.50279                | 0.37430   | 0.12291 | 0.36364                  | 0.38462   | 0.25175 |
| 40-44     | 0.49198                | 0.42246   | 0.08556 | 0.32549                  | 0.45490   | 0.21961 |
| 45-49     | 0.39752                | 0.39130   | 0.21118 | 0.28492                  | 0.45251   | 0.26257 |
| 50-54     | 0.39189                | 0.45946   | 0.14865 | 0.27660                  | 0.41844   | 0.30496 |
| 55-59     | 0.45349                | 0.40698   | 0.13953 | 0.25926                  | 0.41667   | 0.32407 |
| 20-24     | 0.63115                | 0.30328   | 0.06557 | 0.69082                  | 0.19807   | 0.11111 |
| 25-29     | 0.46429                | 0.38571   | 0.15000 | 0.61137                  | 0.28436   | 0.10427 |
| 30-34     | 0.40541                | 0.40541   | 0.18919 | 0.38503                  | 0.40107   | 0.21390 |
| 35-39     | 0.28814                | 0.52542   | 0.18644 | 0.35616                  | 0.36301   | 0.28082 |
| 40-44     | 0.34783                | 0.41739   | 0.23478 | 0.31288                  | 0.36196   | 0.32515 |
| 45-49     | 0.35106                | 0.44681   | 0.20213 | 0.23967                  | 0.40496   | 0.35537 |
| 50-54     | 0.32895                | 0.50000   | 0.17105 | 0.17391                  | 0.45652   | 0.36957 |
| 55-59     | 0.24324                | 0.45946   | 0.29730 | 0.26087                  | 0.33333   | 0.40580 |

**Table 135. Prevalent rates of higher socioeconomic status population by age group, sex, and body mass index category in 2005 (Orinoquia y Amazonia region)**

| Age Group | Nutritional State Male |           |         | Nutritional State Female |           |         |
|-----------|------------------------|-----------|---------|--------------------------|-----------|---------|
|           | Not-Overweigh          | Overweigh | Obese   | Not-Overweigh            | Overweigh | Obese   |
| 0-4       | 0.75641                | 0.19872   | 0.04487 | 0.76984                  | 0.17460   | 0.05556 |
| 5-9       | 0.66225                | 0.21854   | 0.11921 | 0.74658                  | 0.19178   | 0.06164 |
| 10-14     | 0.77301                | 0.14724   | 0.07975 | 0.71728                  | 0.21990   | 0.06283 |
| 15-19     | 0.79592                | 0.14286   | 0.06122 | 0.78182                  | 0.15758   | 0.06061 |
| 20-24     | 0.65306                | 0.25510   | 0.09184 | 0.69753                  | 0.20988   | 0.09259 |
| 25-29     | 0.53600                | 0.35200   | 0.11200 | 0.67816                  | 0.20690   | 0.11494 |
| 30-34     | 0.30189                | 0.50943   | 0.18868 | 0.57143                  | 0.28571   | 0.14286 |
| 35-39     | 0.22826                | 0.47826   | 0.29348 | 0.31073                  | 0.46328   | 0.22599 |
| 40-44     | 0.15447                | 0.51220   | 0.33333 | 0.33775                  | 0.42384   | 0.23841 |
| 45-49     | 0.24752                | 0.49505   | 0.25743 | 0.26400                  | 0.39200   | 0.34400 |
| 50-54     | 0.20833                | 0.48611   | 0.30556 | 0.18750                  | 0.47917   | 0.33333 |
| 55-59     | 0.20370                | 0.38889   | 0.40741 | 0.20779                  | 0.36364   | 0.42857 |

**Table 136. Prevalent rates of entire population by age group, sex, and body mass index category in 2010 (Orinoquia y Amazonia region)**

| Age Group | Nutritional State Male |           |         | Nutritional State Female |           |         |
|-----------|------------------------|-----------|---------|--------------------------|-----------|---------|
|           | Not-Overweigh          | Overweigh | Obese   | Not-Overweigh            | Overweigh | Obese   |
| 0-4       | 0.69989                | 0.23068   | 0.06943 | 0.76251                  | 0.19702   | 0.04047 |

|       |         |         |         |         |         |         |
|-------|---------|---------|---------|---------|---------|---------|
| 5-9   | 0.73990 | 0.18325 | 0.07685 | 0.81022 | 0.14703 | 0.04275 |
| 10-14 | 0.79958 | 0.14376 | 0.05666 | 0.76560 | 0.18904 | 0.04537 |
| 15-19 | 0.85432 | 0.11358 | 0.03210 | 0.74685 | 0.20273 | 0.05042 |
| 20-24 | 0.66436 | 0.26471 | 0.07093 | 0.64390 | 0.26308 | 0.09302 |
| 25-29 | 0.42458 | 0.43575 | 0.13966 | 0.51935 | 0.33780 | 0.14286 |
| 30-34 | 0.36640 | 0.43117 | 0.20243 | 0.41021 | 0.39868 | 0.19110 |
| 35-39 | 0.34112 | 0.48131 | 0.17757 | 0.31979 | 0.45760 | 0.22261 |
| 40-44 | 0.27569 | 0.47870 | 0.24561 | 0.28544 | 0.40613 | 0.30843 |
| 45-49 | 0.29589 | 0.44110 | 0.26301 | 0.25285 | 0.42825 | 0.31891 |
| 50-54 | 0.26374 | 0.47985 | 0.25641 | 0.22161 | 0.43767 | 0.34072 |
| 55-59 | 0.29534 | 0.45078 | 0.25389 | 0.26033 | 0.40083 | 0.33884 |

**Table 137.**

**Prevalent rates of lower socioeconomic status population by age group, sex, and body mass index category in 2010 (Orinoquia y Amazonia region)**

| Age Group | Nutritional State Male |           |         | Nutritional State Female |           |         |
|-----------|------------------------|-----------|---------|--------------------------|-----------|---------|
|           | Not-Overweigh          | Overweigh | Obese   | Not-Overweigh            | Overweigh | Obese   |
| 0-4       | 0.69618                | 0.24275   | 0.06107 | 0.74408                  | 0.21450   | 0.04142 |
| 5-9       | 0.74402                | 0.19269   | 0.06329 | 0.82132                  | 0.13213   | 0.04655 |
| 10-14     | 0.81399                | 0.13244   | 0.05357 | 0.78691                  | 0.17409   | 0.03900 |
| 15-19     | 0.86404                | 0.10555   | 0.03041 | 0.74620                  | 0.21277   | 0.04103 |
| 20-24     | 0.69388                | 0.24745   | 0.05867 | 0.61895                  | 0.28842   | 0.09263 |
| 25-29     | 0.43526                | 0.43251   | 0.13223 | 0.47381                  | 0.36667   | 0.15952 |
| 30-34     | 0.42105                | 0.41118   | 0.16776 | 0.40970                  | 0.39892   | 0.19137 |
| 35-39     | 0.41176                | 0.42647   | 0.16176 | 0.29641                  | 0.48204   | 0.22156 |
| 40-44     | 0.32189                | 0.45494   | 0.22318 | 0.26667                  | 0.41818   | 0.31515 |
| 45-49     | 0.38462                | 0.38914   | 0.22624 | 0.28745                  | 0.40081   | 0.31174 |
| 50-54     | 0.28902                | 0.47399   | 0.23699 | 0.20737                  | 0.46544   | 0.32719 |
| 55-59     | 0.31148                | 0.45082   | 0.23770 | 0.30282                  | 0.40141   | 0.29577 |

**Table 138. Prevalent rates of middle socioeconomic status population by age group, sex, and body mass index category in 2010 (Orinoquia y Amazonia region)**

| Age Group | Nutritional State Male |           |         | Nutritional State Female |           |         |
|-----------|------------------------|-----------|---------|--------------------------|-----------|---------|
|           | Not-Overweigh          | Overweigh | Obese   | Not-Overweigh            | Overweigh | Obese   |
| 0-4       | 0.69588                | 0.20619   | 0.09794 | 0.80193                  | 0.16425   | 0.03382 |
| 5-9       | 0.72174                | 0.18261   | 0.09565 | 0.77727                  | 0.19091   | 0.03182 |
| 10-14     | 0.78404                | 0.15493   | 0.06103 | 0.73600                  | 0.20400   | 0.06000 |
| 15-19     | 0.85326                | 0.10870   | 0.03804 | 0.77578                  | 0.16143   | 0.06278 |
| 20-24     | 0.60274                | 0.29452   | 0.10274 | 0.70414                  | 0.20118   | 0.09467 |
| 25-29     | 0.41304                | 0.41304   | 0.17391 | 0.60825                  | 0.29381   | 0.09794 |
| 30-34     | 0.30282                | 0.43662   | 0.26056 | 0.40341                  | 0.38636   | 0.21023 |
| 35-39     | 0.25664                | 0.54867   | 0.19469 | 0.40120                  | 0.38922   | 0.20958 |
| 40-44     | 0.24561                | 0.45614   | 0.29825 | 0.29323                  | 0.39850   | 0.30827 |
| 45-49     | 0.18557                | 0.45361   | 0.36082 | 0.20149                  | 0.44776   | 0.35075 |
| 50-54     | 0.22581                | 0.50000   | 0.27419 | 0.22105                  | 0.35789   | 0.42105 |
| 55-59     | 0.30000                | 0.42000   | 0.28000 | 0.21739                  | 0.40580   | 0.37681 |

**Table 139. Prevalent rates of higher socioeconomic status population by age group, sex, and body mass index category in 2010 (Orinoquia y Amazonia region)**

| Age Group | Nutritional State Male |           |         | Nutritional State Female |           |         |
|-----------|------------------------|-----------|---------|--------------------------|-----------|---------|
|           | Not-Overweigh          | Overweigh | Obese   | Not-Overweigh            | Overweigh | Obese   |
| 0-4       | 0.77273                | 0.15909   | 0.06818 | 0.83929                  | 0.10714   | 0.05357 |
| 5-9       | 0.75676                | 0.09459   | 0.14865 | 0.80822                  | 0.15068   | 0.04110 |
| 10-14     | 0.70588                | 0.22059   | 0.07353 | 0.67778                  | 0.26667   | 0.05556 |
| 15-19     | 0.77612                | 0.19403   | 0.02985 | 0.66197                  | 0.23944   | 0.09859 |
| 20-24     | 0.60000                | 0.32500   | 0.07500 | 0.68182                  | 0.22727   | 0.09091 |
| 25-29     | 0.36111                | 0.55556   | 0.08333 | 0.55172                  | 0.27586   | 0.17241 |
| 30-34     | 0.20833                | 0.54167   | 0.25000 | 0.43333                  | 0.43333   | 0.13333 |
| 35-39     | 0.11628                | 0.65116   | 0.23256 | 0.23077                  | 0.50769   | 0.26154 |
| 40-44     | 0.13462                | 0.63462   | 0.23077 | 0.37288                  | 0.35593   | 0.27119 |
| 45-49     | 0.10638                | 0.65957   | 0.23404 | 0.22414                  | 0.50000   | 0.27586 |
| 50-54     | 0.21053                | 0.47368   | 0.31579 | 0.28571                  | 0.46939   | 0.24490 |
| 55-59     | 0.19048                | 0.52381   | 0.28571 | 0.16129                  | 0.38710   | 0.45161 |

**Table 140. Fraction of births for men by body mass index category, and socioeconomic status (Orinoquia y Amazonia region) †**

| Population group | Lower SES (%/year) | Middle SES (%/year) | Higher SES (%/year) | Complete Urban Population (%/year) |
|------------------|--------------------|---------------------|---------------------|------------------------------------|
| Not- overweight  | 82,17%             | 82,50%              | 74,36%              | 80,77%                             |
| Overweight       | 13,95%             | 15,00%              | 20,51%              | 15,38%                             |
| Obese            | 3,88%              | 2,50%               | 5,13%               | 3,85%                              |

† The fractions of births by each BMI category correspond to the prevalences by BMI category of children aged 0 to 12 months

**Table 141. Fraction of births for women by body mass index category and socioeconomic status (Orinoquia y Amazonia region) †**

| Population group | Lower SES (%/year) | Middle SES (%/year) | Higher SES (%/year) | Complete Urban Population (%/year) |
|------------------|--------------------|---------------------|---------------------|------------------------------------|
| Not- overweight  | 82,35%             | 86,44%              | 67,74%              | 81,34%                             |
| Overweight       | 14,29%             | 13,56%              | 25,81%              | 15,79%                             |
| Obese            | 3,36%              | 0,00%               | 6,45%               | 2,87%                              |

† The fractions of births by each BMI category correspond to the prevalences by BMI category of children aged 0 to 12 months

**Table 142. Mortality rates for men and population size by age group without segregate by socioeconomic status (Orinoquia y Amazonia region) †**

| Age group | Mortality rates (R) (%/year) | Not- overweight men in 2005 (Number of people)1 | Overweight men in 2005 (Number of people)2 | Obese men in 2005 (Number of people)3 |
|-----------|------------------------------|-------------------------------------------------|--------------------------------------------|---------------------------------------|
| 0-4       | 0.00350                      | 29652                                           | 6476                                       | 1589                                  |
| 5-9       | 0.00043                      | 29523                                           | 5833                                       | 1997                                  |
| 10-14     | 0.00022                      | 30309                                           | 5180                                       | 1619                                  |
| 15-19     | 0.00174                      | 27827                                           | 3252                                       | 1039                                  |
| 20-24     | 0.00513                      | 18532                                           | 5840                                       | 1544                                  |
| 25-29     | 0.00426                      | 12877                                           | 7547                                       | 2089                                  |
| 30-34     | 0.00426                      | 8514                                            | 8649                                       | 2793                                  |
| 35-39     | 0.00307                      | 6927                                            | 8264                                       | 3392                                  |
| 40-44     | 0.00421                      | 5822                                            | 7326                                       | 3239                                  |

| Age group | Mortality rates (R) (%/year) | Not- overweight men in 2005 (Number of people) <sup>1</sup> | Overweight men in 2005 (Number of people) <sup>2</sup> | Obese men in 2005 (Number of people) <sup>3</sup> |
|-----------|------------------------------|-------------------------------------------------------------|--------------------------------------------------------|---------------------------------------------------|
| 45-49     | 0.00342                      | 4415                                                        | 5609                                                   | 2859                                              |
| 50-54     | 0.00538                      | 3202                                                        | 4606                                                   | 1862                                              |
| 55-59     | 0.00882                      | 2380                                                        | 2945                                                   | 1815                                              |

<sup>†</sup>Values used in this table are for the urban population

<sup>1</sup> Initial value used in the stock of not-overweight population in 2005.

<sup>2</sup> Initial value used in the stock of overweight population in 2005.

<sup>3</sup> Initial value used in the stock of obese population in 2005.

**Table 143. Mortality rates for women and population size by age group without segregate by socioeconomic status (Orinoquia y Amazonia region) <sup>†</sup>**

| Age group | Mortality rates (R) (%/year) | Not- overweight women in 2005 (Number of people) <sup>1</sup> | Overweight women in 2005 (Number of people) <sup>2</sup> | Obese women in 2005 (Number of people) <sup>3</sup> |
|-----------|------------------------------|---------------------------------------------------------------|----------------------------------------------------------|-----------------------------------------------------|
| 0-4       | 0.00359                      | 29193                                                         | 6332                                                     | 1275                                                |
| 5-9       | 0.00032                      | 31109                                                         | 4843                                                     | 1278                                                |
| 10-14     | 0.00043                      | 29513                                                         | 6231                                                     | 1642                                                |
| 15-19     | 0.00089                      | 25369                                                         | 6991                                                     | 1465                                                |
| 20-24     | 0.00129                      | 18722                                                         | 5932                                                     | 2537                                                |
| 25-29     | 0.00132                      | 14483                                                         | 6728                                                     | 3016                                                |
| 30-34     | 0.00175                      | 10686                                                         | 7450                                                     | 4146                                                |
| 35-39     | 0.00126                      | 7122                                                          | 8270                                                     | 5164                                                |
| 40-44     | 0.00136                      | 5725                                                          | 7396                                                     | 4487                                                |
| 45-49     | 0.00243                      | 3613                                                          | 5724                                                     | 4253                                                |
| 50-54     | 0.00472                      | 2210                                                          | 4450                                                     | 3299                                                |
| 55-59     | 0.00699                      | 1815                                                          | 2811                                                     | 2811                                                |

<sup>†</sup>Values used in this table are for the urban population

<sup>1</sup> Initial value used in the stock of not-overweight population in 2005.

<sup>2</sup> Initial value used in the stock of overweight population in 2005.

<sup>3</sup> Initial value used in the stock of obese population in 2005.

**Table 144. Man mortality rates and population size by age group for the lower socioeconomic status population (Orinoquia y Amazonia region) <sup>†</sup>**

| Age group | Mortality rates (R) (%/year) | Not- overweight men in 2005 (Number of people) <sup>1</sup> | Overweight men in 2005 (Number of people) <sup>2</sup> | Obese men in 2005 (Number of people) <sup>3</sup> |
|-----------|------------------------------|-------------------------------------------------------------|--------------------------------------------------------|---------------------------------------------------|
| 0-4       | 0.00350                      | 17881                                                       | 3299                                                   | 855                                               |
| 5-9       | 0.00043                      | 18457                                                       | 3156                                                   | 719                                               |
| 10-14     | 0.00022                      | 18169                                                       | 2630                                                   | 526                                               |
| 15-19     | 0.00174                      | 16262                                                       | 1355                                                   | 407                                               |
| 20-24     | 0.00513                      | 11727                                                       | 2847                                                   | 724                                               |
| 25-29     | 0.00426                      | 7249                                                        | 3368                                                   | 597                                               |
| 30-34     | 0.00426                      | 5045                                                        | 4189                                                   | 946                                               |
| 35-39     | 0.00307                      | 4299                                                        | 3201                                                   | 1051                                              |
| 40-44     | 0.00421                      | 3547                                                        | 3046                                                   | 617                                               |
| 45-49     | 0.00342                      | 2316                                                        | 2280                                                   | 1230                                              |
| 50-54     | 0.00538                      | 1895                                                        | 2221                                                   | 719                                               |
| 55-59     | 0.00882                      | 1573                                                        | 1412                                                   | 484                                               |

<sup>†</sup>Values used in this table are for the urban population

<sup>1</sup> Initial value used in the stock of not-overweight population in 2005 for lower SES.

<sup>2</sup> Initial value used in the stock of overweight population in 2005 for lower SES.

<sup>3</sup> Initial value used in the stock of obese population in 2005 for lower SES.

**Table 145. Women mortality rates and population size by age group for the lower socioeconomic status population (Orinoquia y Amazonia region) †**

| Age group | Mortality rates (R) (%/year) | Not- overweight women in 2005 (Number of people) <sup>1</sup> | Overweight women in 2005 (Number of people) <sup>2</sup> | Obese women in 2005 (Number of people) <sup>3</sup> |
|-----------|------------------------------|---------------------------------------------------------------|----------------------------------------------------------|-----------------------------------------------------|
| 0-4       | 0.00359                      | 16823                                                         | 3960                                                     | 717                                                 |
| 5-9       | 0.00032                      | 19515                                                         | 2396                                                     | 348                                                 |
| 10-14     | 0.00043                      | 17621                                                         | 3297                                                     | 568                                                 |
| 15-19     | 0.00089                      | 14034                                                         | 4266                                                     | 682                                                 |
| 20-24     | 0.00129                      | 10978                                                         | 3710                                                     | 1363                                                |
| 25-29     | 0.00132                      | 6627                                                          | 3732                                                     | 1709                                                |
| 30-34     | 0.00175                      | 5557                                                          | 3632                                                     | 2179                                                |
| 35-39     | 0.00126                      | 3440                                                          | 3638                                                     | 2381                                                |
| 40-44     | 0.00136                      | 2522                                                          | 3524                                                     | 1701                                                |
| 45-49     | 0.00243                      | 1751                                                          | 2781                                                     | 1614                                                |
| 50-54     | 0.00472                      | 1377                                                          | 2084                                                     | 1519                                                |
| 55-59     | 0.00699                      | 937                                                           | 1506                                                     | 1171                                                |

†Values used in this table are for the urban population

<sup>1</sup> Initial value used in the stock of not-overweight population in 2005 for lower SES.

<sup>2</sup> Initial value used in the stock of overweight population in 2005 for lower SES.

<sup>3</sup> Initial value used in the stock of obese population in 2005 for lower SES.

**Table 146. Man mortality rates and population size by age group for the middle socioeconomic status population (Orinoquia y Amazonia region) †**

| Age group | Mortality rates (R) (%/year) | Not- overweight men in 2005 (Number of people) <sup>1</sup> | Overweight men in 2005 (Number of people) <sup>2</sup> | Obese men in 2005 (Number of people) <sup>3</sup> |
|-----------|------------------------------|-------------------------------------------------------------|--------------------------------------------------------|---------------------------------------------------|
| 0-4       | 0.00350                      | 6965                                                        | 1914                                                   | 448                                               |
| 5-9       | 0.00043                      | 7071                                                        | 1358                                                   | 559                                               |
| 10-14     | 0.00022                      | 7041                                                        | 1578                                                   | 567                                               |
| 15-19     | 0.00174                      | 6279                                                        | 949                                                    | 226                                               |
| 20-24     | 0.00513                      | 3716                                                        | 1786                                                   | 386                                               |
| 25-29     | 0.00426                      | 2771                                                        | 2302                                                   | 895                                               |
| 30-34     | 0.00426                      | 2027                                                        | 2027                                                   | 946                                               |
| 35-39     | 0.00307                      | 1624                                                        | 2962                                                   | 1051                                              |
| 40-44     | 0.00421                      | 1542                                                        | 1851                                                   | 1041                                              |
| 45-49     | 0.00342                      | 1194                                                        | 1520                                                   | 688                                               |
| 50-54     | 0.00538                      | 817                                                         | 1241                                                   | 425                                               |
| 55-59     | 0.00882                      | 363                                                         | 686                                                    | 444                                               |

†Values used in this table are for the urban population

<sup>1</sup> Initial value used in the stock of not-overweight population in 2005 for middle SES.

<sup>2</sup> Initial value used in the stock of overweight population in 2005 for middle SES.

<sup>3</sup> Initial value used in the stock of obese population in 2005 for middle SES.

**Table 147. Women mortality rates and population size by age group for the middle socioeconomic status population (Orinoquia y Amazonia region) †**

| Age group | Mortality rates (R) (%/year) | Not- overweight women in 2005 (Number of people) <sup>1</sup> | Overweight women in 2005 (Number of people) <sup>2</sup> | Obese women in 2005 (Number of people) <sup>3</sup> |
|-----------|------------------------------|---------------------------------------------------------------|----------------------------------------------------------|-----------------------------------------------------|
| 0-4       | 0.00359                      | 7637                                                          | 1235                                                     | 229                                                 |
| 5-9       | 0.00032                      | 7085                                                          | 1312                                                     | 562                                                 |
| 10-14     | 0.00043                      | 7169                                                          | 1441                                                     | 645                                                 |
| 15-19     | 0.00089                      | 5867                                                          | 1625                                                     | 357                                                 |
| 20-24     | 0.00129                      | 4268                                                          | 1224                                                     | 686                                                 |

|       |         |      |      |      |
|-------|---------|------|------|------|
| 25-29 | 0.00132 | 3927 | 1827 | 670  |
| 30-34 | 0.00175 | 2150 | 2239 | 1194 |
| 35-39 | 0.00126 | 2221 | 2264 | 1751 |
| 40-44 | 0.00136 | 1491 | 1725 | 1549 |
| 45-49 | 0.00243 | 860  | 1453 | 1275 |
| 50-54 | 0.00472 | 445  | 1167 | 945  |
| 55-59 | 0.00699 | 406  | 518  | 631  |

†Values used in this table are for the urban population

1 Initial value used in the stock of not-overweight population in 2005 for middle SES.

2 Initial value used in the stock of overweight population in 2005 for middle SES.

3 Initial value used in the stock of obese population in 2005 for middle SES.

**Table 148. Man mortality rates and population size by age group for the higher socioeconomic status population (Orinoquia y Amazonia region) †**

| Age group | Mortality rates (R) (%/year) | Not- overweight men in 2005 (Number of people) <sup>1</sup> | Overweight men in 2005 (Number of people) <sup>2</sup> | Obese men in 2005 (Number of people) <sup>3</sup> |
|-----------|------------------------------|-------------------------------------------------------------|--------------------------------------------------------|---------------------------------------------------|
| 0-4       | 0.00350                      | 4806                                                        | 1263                                                   | 285                                               |
| 5-9       | 0.00043                      | 3995                                                        | 1318                                                   | 719                                               |
| 10-14     | 0.00022                      | 5099                                                        | 971                                                    | 526                                               |
| 15-19     | 0.00174                      | 5285                                                        | 949                                                    | 407                                               |
| 20-24     | 0.00513                      | 3089                                                        | 1207                                                   | 434                                               |
| 25-29     | 0.00426                      | 2857                                                        | 1876                                                   | 597                                               |
| 30-34     | 0.00426                      | 1442                                                        | 2433                                                   | 901                                               |
| 35-39     | 0.00307                      | 1003                                                        | 2102                                                   | 1290                                              |
| 40-44     | 0.00421                      | 733                                                         | 2429                                                   | 1581                                              |
| 45-49     | 0.00342                      | 905                                                         | 1809                                                   | 941                                               |
| 50-54     | 0.00538                      | 490                                                         | 1143                                                   | 719                                               |
| 55-59     | 0.00882                      | 444                                                         | 847                                                    | 887                                               |

†Values used in this table are for the urban population

<sup>1</sup> Initial value used in the stock of not-overweight population in 2005 for higher SES.

<sup>2</sup> Initial value used in the stock of overweight population in 2005 for higher SES.

<sup>3</sup> Initial value used in the stock of obese population in 2005 for higher SES.

**Table 149. Women mortality rates and population size by age group for the higher socioeconomic status population (Orinoquia y Amazonia region) †**

| Age group | Mortality rates (R) (%/year) | Not- overweight women in 2005 (Number of people) <sup>1</sup> | Overweight women in 2005 (Number of people) <sup>2</sup> | Obese women in 2005 (Number of people) <sup>3</sup> |
|-----------|------------------------------|---------------------------------------------------------------|----------------------------------------------------------|-----------------------------------------------------|
| 0-4       | 0.00359                      | 4773                                                          | 1082                                                     | 344                                                 |
| 5-9       | 0.00032                      | 4489                                                          | 1153                                                     | 371                                                 |
| 10-14     | 0.00043                      | 4767                                                          | 1461                                                     | 418                                                 |
| 15-19     | 0.00089                      | 5468                                                          | 1102                                                     | 424                                                 |
| 20-24     | 0.00129                      | 3461                                                          | 1041                                                     | 459                                                 |
| 25-29     | 0.00132                      | 3890                                                          | 1187                                                     | 659                                                 |
| 30-34     | 0.00175                      | 3047                                                          | 1523                                                     | 762                                                 |
| 35-39     | 0.00126                      | 1511                                                          | 2252                                                     | 1099                                                |
| 40-44     | 0.00136                      | 1721                                                          | 2160                                                     | 1215                                                |
| 45-49     | 0.00243                      | 1018                                                          | 1511                                                     | 1326                                                |
| 50-54     | 0.00472                      | 454                                                           | 1161                                                     | 807                                                 |
| 55-59     | 0.00699                      | 471                                                           | 825                                                      | 972                                                 |

†Values used in this table are for the urban population

<sup>1</sup> Initial value used in the stock of not-overweight population in 2005 for higher SES.

<sup>2</sup> Initial value used in the stock of overweight population in 2005 for higher SES.

<sup>3</sup> Initial value used in the stock of obese population in 2005 for higher SES.

**Table 150. Data and projections of the Fertility rates by department and Region (Orinoquia y Amazonia region)<sup>†</sup>**

| Year | Fecundity Rate Depto 81 | Fecundity Rate Depto 85 | Fecundity Rate Depto 86 | Fecundity Rate Depto 91 | Fecundity Rate Depto 94 | Fecundity Rate Depto 95 | Fecundity Rate Depto 97 | Fecundity Rate Depto 99 | Average Region Fecundity Rate |
|------|-------------------------|-------------------------|-------------------------|-------------------------|-------------------------|-------------------------|-------------------------|-------------------------|-------------------------------|
| 2005 | 4,0058                  | 3,1197                  | 3,5644                  | 4,3448                  | 4,3448                  | 4,3448                  | 4,3448                  | 4,3448                  | 4,052                         |
| 2006 | 3,9757                  | 3,0478                  | 3,4811                  | 4,2532                  | 4,2532                  | 4,2532                  | 4,2532                  | 4,2532                  | 3,971                         |
| 2007 | 3,9456                  | 2,9759                  | 3,3978                  | 4,1616                  | 4,1616                  | 4,1616                  | 4,1616                  | 4,1616                  | 3,891                         |
| 2008 | 3,9155                  | 2,904                   | 3,3145                  | 4,07                    | 4,07                    | 4,07                    | 4,07                    | 4,07                    | 3,811                         |
| 2009 | 3,862                   | 2,8585                  | 3,262                   | 3,9922                  | 3,9922                  | 3,9922                  | 3,9922                  | 3,9922                  | 3,743                         |
| 2010 | 3,8085                  | 2,813                   | 3,2095                  | 3,9144                  | 3,9144                  | 3,9144                  | 3,9144                  | 3,9144                  | 3,675                         |
| 2011 | 3,755                   | 2,7675                  | 3,157                   | 3,8366                  | 3,8366                  | 3,8366                  | 3,8366                  | 3,8366                  | 3,608                         |
| 2012 | 3,7015                  | 2,722                   | 3,1045                  | 3,7588                  | 3,7588                  | 3,7588                  | 3,7588                  | 3,7588                  | 3,540                         |
| 2013 | 3,648                   | 2,6765                  | 3,052                   | 3,681                   | 3,681                   | 3,681                   | 3,681                   | 3,681                   | 3,473                         |
| 2014 | 3,5732                  | 2,6495                  | 3,0211                  | 3,6205                  | 3,6205                  | 3,6205                  | 3,6205                  | 3,6205                  | 3,418                         |
| 2015 | 3,4984                  | 2,6225                  | 2,9902                  | 3,56                    | 3,56                    | 3,56                    | 3,56                    | 3,56                    | 3,364                         |
| 2016 | 3,4236                  | 2,5955                  | 2,9593                  | 3,4995                  | 3,4995                  | 3,4995                  | 3,4995                  | 3,4995                  | 3,309                         |
| 2017 | 3,3488                  | 2,5685                  | 2,9284                  | 3,439                   | 3,439                   | 3,439                   | 3,439                   | 3,439                   | 3,255                         |
| 2018 | 3,274                   | 2,5415                  | 2,8975                  | 3,3785                  | 3,3785                  | 3,3785                  | 3,3785                  | 3,3785                  | 3,201                         |
| 2019 | 3,1992                  | 2,5145                  | 2,8666                  | 3,318                   | 3,318                   | 3,318                   | 3,318                   | 3,318                   | 3,146                         |
| 2020 | 3,1244                  | 2,4875                  | 2,8357                  | 3,2575                  | 3,2575                  | 3,2575                  | 3,2575                  | 3,2575                  | 3,092                         |
| 2021 | 3,0496                  | 2,4605                  | 2,8048                  | 3,197                   | 3,197                   | 3,197                   | 3,197                   | 3,197                   | 3,037                         |
| 2022 | 2,9748                  | 2,4335                  | 2,7739                  | 3,1365                  | 3,1365                  | 3,1365                  | 3,1365                  | 3,1365                  | 2,983                         |
| 2023 | 2,9                     | 2,4065                  | 2,743                   | 3,076                   | 3,076                   | 3,076                   | 3,076                   | 3,076                   | 2,929                         |
| 2024 | 2,8252                  | 2,3795                  | 2,7121                  | 3,0155                  | 3,0155                  | 3,0155                  | 3,0155                  | 3,0155                  | 2,874                         |
| 2025 | 2,7504                  | 2,3525                  | 2,6812                  | 2,955                   | 2,955                   | 2,955                   | 2,955                   | 2,955                   | 2,820                         |
| 2026 | 2,6756                  | 2,3255                  | 2,6503                  | 2,8945                  | 2,8945                  | 2,8945                  | 2,8945                  | 2,8945                  | 2,765                         |
| 2027 | 2,6008                  | 2,2985                  | 2,6194                  | 2,834                   | 2,834                   | 2,834                   | 2,834                   | 2,834                   | 2,711                         |
| 2028 | 2,526                   | 2,2715                  | 2,5885                  | 2,7735                  | 2,7735                  | 2,7735                  | 2,7735                  | 2,7735                  | 2,657                         |
| 2029 | 2,4512                  | 2,2445                  | 2,5576                  | 2,713                   | 2,713                   | 2,713                   | 2,713                   | 2,713                   | 2,602                         |
| 2030 | 2,3764                  | 2,2175                  | 2,5267                  | 2,6525                  | 2,6525                  | 2,6525                  | 2,6525                  | 2,6525                  | 2,548                         |

<sup>†</sup> Data of Fertility rate of DANE [1] was used to forecast the department's fertility rate from 2005 to 2030. Holt-Winters no seasonal method in EViews 5 (Quantitative Micro Software, LLC) was used to forecast the fertility rate. In the SD model we used data from 2005 to 2030 and the region fertility rate was calculated as the average of all departments' fertility rates.

**Table 151. Fraction of births by departments, body mass index category, and socioeconomic status (Orinoquia y Amazonia region)<sup>†</sup>**



| Population group |                 | Lower SES (%/year) | Middle SES (%/year) | Higher SES (%/year) | Complete Urban Population (%/year) |
|------------------|-----------------|--------------------|---------------------|---------------------|------------------------------------|
| Department 81    | Not- overweight | 75,00%             | 75,00%              | 88,89%              | 79,63%                             |
|                  | Overweight      | 25,00%             | 25,00%              | 11,11%              | 20,37%                             |
|                  | Obese           | 0,00%              | 0,00%               | 0,00%               | 0,00%                              |
| Department 85    | Not- overweight | 68,75%             | 95,24%              | 71,43%              | 80,39%                             |
|                  | Overweight      | 25,00%             | 0,00%               | 21,43%              | 13,73%                             |
|                  | Obese           | 6,25%              | 4,76%               | 7,14%               | 5,88%                              |
| Department 86    | Not- overweight | 90,91%             | 94,44%              | 35,71%              | 74,42%                             |
|                  | Overweight      | 0,00%              | 5,56%               | 57,14%              | 20,93%                             |
|                  | Obese           | 9,09%              | 0,00%               | 7,14%               | 4,65%                              |
| Department 91    | Not- overweight | 90,70%             | 88,24%              | 81,82%              | 88,73%                             |
|                  | Overweight      | 9,30%              | 11,76%              | 9,09%               | 9,86%                              |
|                  | Obese           | 0,00%              | 0,00%               | 9,09%               | 1,41%                              |
| Department 94    | Not- overweight | 78,95%             | 72,73%              | 66,67%              | 76,36%                             |
|                  | Overweight      | 10,53%             | 27,27%              | 33,33%              | 16,36%                             |
|                  | Obese           | 10,53%             | 0,00%               | 0,00%               | 7,27%                              |
| Department 95    | Not- overweight | 88,89%             | 92,86%              | 80,00%              | 89,09%                             |
|                  | Overweight      | 11,11%             | 7,14%               | 0,00%               | 9,09%                              |
|                  | Obese           | 0,00%              | 0,00%               | 20,00%              | 1,82%                              |
| Department 97    | Not- overweight | 79,31%             | 66,67%              | 100,00%             | 79,03%                             |
|                  | Overweight      | 17,24%             | 33,33%              | 0,00%               | 17,74%                             |
|                  | Obese           | 3,45%              | 0,00%               | 0,00%               | 3,23%                              |
| Department 99    | Not- overweight | 76,19%             | 50,00%              | 100,00%             | 76,00%                             |
|                  | Overweight      | 19,05%             | 50,00%              | 0,00%               | 20,00%                             |
|                  | Obese           | 4,76%              | 0,00%               | 0,00%               | 4,00%                              |

† The fractions of births by each BMI category correspond to the prevalences by BMI category of children aged 0 to 12 months

**Table 152. Prevalent rates of entire population by age group, and body mass index category (Orinoquia y Amazonia region)**

| Departments   | Age group | Not- overweight in 2005 | Overweight in 2005 | Obese in 2005 | Not- overweight in 2010 | Overweight in 2010 | Obese in 2010 |
|---------------|-----------|-------------------------|--------------------|---------------|-------------------------|--------------------|---------------|
| Department 81 | 0-4       | 0.76991                 | 0.21239            | 0.01770       | 0.75099                 | 0.18577            | 0.06324       |
|               | 5-9       | 0.82266                 | 0.13793            | 0.03941       | 0.82313                 | 0.12245            | 0.05442       |
|               | 10-14     | 0.80711                 | 0.13706            | 0.05584       | 0.79110                 | 0.16438            | 0.04452       |
|               | 15-19     | 0.77714                 | 0.17143            | 0.05143       | 0.78295                 | 0.14729            | 0.06977       |
|               | 20-24     | 0.73864                 | 0.18750            | 0.07386       | 0.66667                 | 0.20000            | 0.13333       |
|               | 25-29     | 0.54651                 | 0.31977            | 0.13372       | 0.47929                 | 0.38462            | 0.13609       |
|               | 30-34     | 0.44138                 | 0.38621            | 0.17241       | 0.37278                 | 0.41420            | 0.21302       |
|               | 35-39     | 0.37226                 | 0.37956            | 0.24818       | 0.37821                 | 0.40385            | 0.21795       |
|               | 40-44     | 0.27737                 | 0.40146            | 0.32117       | 0.31325                 | 0.47590            | 0.21084       |
|               | 45-49     | 0.25714                 | 0.46667            | 0.27619       | 0.28571                 | 0.43651            | 0.27778       |
|               | 50-54     | 0.24675                 | 0.44156            | 0.31169       | 0.30108                 | 0.37634            | 0.32258       |
| 55-59         | 0.28571   | 0.30612                 | 0.40816            | 0.30357       | 0.32143                 | 0.37500            |               |
| Department 85 | 0-4       | 0.80447                 | 0.16760            | 0.02793       | 0.80370                 | 0.16296            | 0.03333       |
|               | 5-9       | 0.84848                 | 0.10909            | 0.04242       | 0.80259                 | 0.13916            | 0.05825       |
|               | 10-14     | 0.82353                 | 0.14379            | 0.03268       | 0.79538                 | 0.15842            | 0.04620       |
|               | 15-19     | 0.81250                 | 0.16250            | 0.02500       | 0.81423                 | 0.15020            | 0.03557       |
|               | 20-24     | 0.74725                 | 0.19231            | 0.06044       | 0.69849                 | 0.23116            | 0.07035       |
|               | 25-29     | 0.60920                 | 0.28161            | 0.10920       | 0.50962                 | 0.34135            | 0.14904       |
|               | 30-34     | 0.54867                 | 0.33628            | 0.11504       | 0.35870                 | 0.42391            | 0.21739       |
| 35-39         | 0.28846   | 0.55769                 | 0.15385            | 0.28804       | 0.50000                 | 0.21196            |               |

| Departments      | Age group        | Not- overweight<br>in 2005 | Overweight<br>in 2005 | Obese in<br>2005 | Not- overweight<br>in 2010 | Overweight<br>in 2010 | Obese in<br>2010 |
|------------------|------------------|----------------------------|-----------------------|------------------|----------------------------|-----------------------|------------------|
|                  | 40-44            | 0.28889                    | 0.38889               | 0.32222          | 0.31034                    | 0.38621               | 0.30345          |
|                  | 45-49            | 0.27273                    | 0.50649               | 0.22078          | 0.21488                    | 0.54545               | 0.23967          |
|                  | 50-54            | 0.24615                    | 0.50769               | 0.24615          | 0.23077                    | 0.45192               | 0.31731          |
|                  | 55-59            | 0.24444                    | 0.40000               | 0.35556          | 0.19118                    | 0.47059               | 0.33824          |
| Department<br>86 | 0-4              | 0.78788                    | 0.16667               | 0.04545          | 0.76923                    | 0.18750               | 0.04327          |
|                  | 5-9              | 0.75862                    | 0.18966               | 0.05172          | 0.80451                    | 0.12782               | 0.06767          |
|                  | 10-14            | 0.79630                    | 0.12963               | 0.07407          | 0.83122                    | 0.15190               | 0.01688          |
|                  | 15-19            | 0.68889                    | 0.15556               | 0.15556          | 0.83505                    | 0.11340               | 0.05155          |
|                  | 20-24            | 0.73333                    | 0.11111               | 0.15556          | 0.66851                    | 0.27624               | 0.05525          |
|                  | 25-29            | 0.59091                    | 0.34091               | 0.06818          | 0.54211                    | 0.35263               | 0.10526          |
|                  | 30-34            | 0.43590                    | 0.48718               | 0.07692          | 0.43151                    | 0.41781               | 0.15068          |
|                  | 35-39            | 0.44828                    | 0.41379               | 0.13793          | 0.39831                    | 0.43220               | 0.16949          |
|                  | 40-44            | 0.33333                    | 0.50000               | 0.16667          | 0.37190                    | 0.39669               | 0.23140          |
|                  | 45-49            | 0.36842                    | 0.42105               | 0.21053          | 0.25275                    | 0.48352               | 0.26374          |
|                  | 50-54            | 0.33333                    | 0.46667               | 0.20000          | 0.25806                    | 0.51613               | 0.22581          |
|                  | 55-59            | 0.00000                    | 0.33333               | 0.66667          | 0.26415                    | 0.50943               | 0.22642          |
|                  | Department<br>91 | 0-4                        | 0.80556               | 0.14931          | 0.04514                    | 0.75000               | 0.21000          |
| 5-9              |                  | 0.80756                    | 0.16151               | 0.03093          | 0.81385                    | 0.14286               | 0.04329          |
| 10-14            |                  | 0.75986                    | 0.18638               | 0.05376          | 0.75000                    | 0.15761               | 0.09239          |
| 15-19            |                  | 0.81356                    | 0.13983               | 0.04661          | 0.82051                    | 0.15897               | 0.02051          |
| 20-24            |                  | 0.65700                    | 0.24638               | 0.09662          | 0.61146                    | 0.29936               | 0.08917          |
| 25-29            |                  | 0.50955                    | 0.32484               | 0.16561          | 0.45185                    | 0.41481               | 0.13333          |
| 30-34            |                  | 0.38462                    | 0.38462               | 0.23077          | 0.40580                    | 0.39855               | 0.19565          |
| 35-39            |                  | 0.33846                    | 0.40000               | 0.26154          | 0.37255                    | 0.46078               | 0.16667          |
| 40-44            |                  | 0.30882                    | 0.47059               | 0.22059          | 0.32000                    | 0.45000               | 0.23000          |
| 45-49            |                  | 0.23232                    | 0.41414               | 0.35354          | 0.11905                    | 0.52381               | 0.35714          |
| 50-54            |                  | 0.20879                    | 0.49451               | 0.29670          | 0.21333                    | 0.42667               | 0.36000          |
| 55-59            |                  | 0.33784                    | 0.35135               | 0.31081          | 0.27451                    | 0.43137               | 0.29412          |
| Department<br>94 |                  | 0-4                        | 0.79741               | 0.15948          | 0.04310                    | 0.74089               | 0.21457          |
|                  | 5-9              | 0.73333                    | 0.18333               | 0.08333          | 0.71233                    | 0.20548               | 0.08219          |
|                  | 10-14            | 0.79389                    | 0.17939               | 0.02672          | 0.74060                    | 0.16541               | 0.09398          |
|                  | 15-19            | 0.78421                    | 0.18421               | 0.03158          | 0.72772                    | 0.22277               | 0.04950          |
|                  | 20-24            | 0.63190                    | 0.26994               | 0.09816          | 0.60563                    | 0.30282               | 0.09155          |
|                  | 25-29            | 0.56098                    | 0.34146               | 0.09756          | 0.37975                    | 0.41139               | 0.20886          |
|                  | 30-34            | 0.52414                    | 0.33793               | 0.13793          | 0.35417                    | 0.43750               | 0.20833          |
|                  | 35-39            | 0.40940                    | 0.39597               | 0.19463          | 0.32258                    | 0.41935               | 0.25806          |
|                  | 40-44            | 0.36029                    | 0.46324               | 0.17647          | 0.20690                    | 0.44828               | 0.34483          |
|                  | 45-49            | 0.35238                    | 0.36190               | 0.28571          | 0.30526                    | 0.35789               | 0.33684          |
|                  | 50-54            | 0.28395                    | 0.54321               | 0.17284          | 0.19540                    | 0.49425               | 0.31034          |
|                  | 55-59            | 0.36620                    | 0.42254               | 0.21127          | 0.30303                    | 0.42424               | 0.27273          |
|                  | Department<br>95 | 0-4                        | 0.76494               | 0.19522          | 0.03984                    | 0.66667               | 0.25490          |
| 5-9              |                  | 0.82869                    | 0.15139               | 0.01992          | 0.71498                    | 0.17391               | 0.11111          |
| 10-14            |                  | 0.85294                    | 0.13725               | 0.00980          | 0.78889                    | 0.16667               | 0.04444          |
| 15-19            |                  | 0.83186                    | 0.15044               | 0.01770          | 0.79574                    | 0.14894               | 0.05532          |
| 20-24            |                  | 0.75325                    | 0.21429               | 0.03247          | 0.63309                    | 0.26619               | 0.10072          |

| Departments   | Age group     | Not- overweight in 2005 | Overweight in 2005 | Obese in 2005 | Not- overweight in 2010 | Overweight in 2010 | Obese in 2010 |
|---------------|---------------|-------------------------|--------------------|---------------|-------------------------|--------------------|---------------|
|               | 25-29         | 0.66667                 | 0.29167            | 0.04167       | 0.45370                 | 0.38889            | 0.15741       |
|               | 30-34         | 0.42063                 | 0.42063            | 0.15873       | 0.35238                 | 0.40000            | 0.24762       |
|               | 35-39         | 0.46364                 | 0.40000            | 0.13636       | 0.27586                 | 0.50000            | 0.22414       |
|               | 40-44         | 0.48529                 | 0.41912            | 0.09559       | 0.14151                 | 0.43396            | 0.42453       |
|               | 45-49         | 0.39252                 | 0.42991            | 0.17757       | 0.31731                 | 0.31731            | 0.36538       |
|               | 50-54         | 0.35065                 | 0.51948            | 0.12987       | 0.15584                 | 0.41558            | 0.42857       |
|               | 55-59         | 0.41176                 | 0.39216            | 0.19608       | 0.26415                 | 0.35849            | 0.37736       |
| Department 97 | 0-4           | 0.76494                 | 0.19522            | 0.03984       | 0.48792                 | 0.40097            | 0.11111       |
|               | 5-9           | 0.82869                 | 0.15139            | 0.01992       | 0.71186                 | 0.25000            | 0.03814       |
|               | 10-14         | 0.85294                 | 0.13725            | 0.00980       | 0.78070                 | 0.20614            | 0.01316       |
|               | 15-19         | 0.83186                 | 0.15044            | 0.01770       | 0.78922                 | 0.20588            | 0.00490       |
|               | 20-24         | 0.75325                 | 0.21429            | 0.03247       | 0.72951                 | 0.21311            | 0.05738       |
|               | 25-29         | 0.66667                 | 0.29167            | 0.04167       | 0.49495                 | 0.39394            | 0.11111       |
|               | 30-34         | 0.42063                 | 0.42063            | 0.15873       | 0.45652                 | 0.40217            | 0.14130       |
|               | 35-39         | 0.46364                 | 0.40000            | 0.13636       | 0.33750                 | 0.50000            | 0.16250       |
|               | 40-44         | 0.48529                 | 0.41912            | 0.09559       | 0.28169                 | 0.52113            | 0.19718       |
|               | 45-49         | 0.39252                 | 0.42991            | 0.17757       | 0.37500                 | 0.41250            | 0.21250       |
|               | 50-54         | 0.35065                 | 0.51948            | 0.12987       | 0.29487                 | 0.50000            | 0.20513       |
|               | 55-59         | 0.41176                 | 0.39216            | 0.19608       | 0.26316                 | 0.44737            | 0.28947       |
|               | Department 99 | 0-4                     | 0.76699            | 0.19417       | 0.03883                 | 0.83951            | 0.12757       |
| 5-9           |               | 0.84064                 | 0.12351            | 0.03586       | 0.77358                 | 0.19340            | 0.03302       |
| 10-14         |               | 0.80349                 | 0.14847            | 0.04803       | 0.76623                 | 0.17316            | 0.06061       |
| 15-19         |               | 0.79888                 | 0.13408            | 0.06704       | 0.80543                 | 0.15385            | 0.04072       |
| 20-24         |               | 0.73077                 | 0.19231            | 0.07692       | 0.60274                 | 0.33562            | 0.06164       |
| 25-29         |               | 0.57554                 | 0.30216            | 0.12230       | 0.47887                 | 0.39437            | 0.12676       |
| 30-34         |               | 0.45455                 | 0.37121            | 0.17424       | 0.42276                 | 0.39837            | 0.17886       |
| 35-39         |               | 0.33043                 | 0.40000            | 0.26957       | 0.27193                 | 0.54386            | 0.18421       |
| 40-44         |               | 0.28846                 | 0.38462            | 0.32692       | 0.27083                 | 0.41667            | 0.31250       |
| 45-49         |               | 0.29000                 | 0.42000            | 0.29000       | 0.31068                 | 0.38835            | 0.30097       |
| 50-54         |               | 0.34118                 | 0.36471            | 0.29412       | 0.27586                 | 0.50000            | 0.22414       |
| 55-59         |               | 0.16279                 | 0.62791            | 0.20930       | 0.36000                 | 0.42000            | 0.22000       |

**Table 153. Prevalent rates of lower socioeconomic status population by age group, and body mass index category (Orinoquia y Amazonia region)**

| Departments   | Age group | Not- overweight in 2005 | Overweight in 2005 | Obese in 2005 | Not- overweight in 2010 | Overweight in 2010 | Obese in 2010 |
|---------------|-----------|-------------------------|--------------------|---------------|-------------------------|--------------------|---------------|
| Department 81 | 0-4       | 0.74684                 | 0.25316            | 0.00000       | 0.74576                 | 0.20339            | 0.05085       |
|               | 5-9       | 0.89706                 | 0.08824            | 0.01471       | 0.87591                 | 0.09489            | 0.02920       |
|               | 10-14     | 0.83871                 | 0.14516            | 0.01613       | 0.88034                 | 0.07692            | 0.04274       |
|               | 15-19     | 0.82692                 | 0.17308            | 0.00000       | 0.79000                 | 0.12000            | 0.09000       |
|               | 20-24     | 0.79032                 | 0.11290            | 0.09677       | 0.75362                 | 0.10145            | 0.14493       |
|               | 25-29     | 0.65116                 | 0.23256            | 0.11628       | 0.50704                 | 0.38028            | 0.11268       |
|               | 30-34     | 0.56757                 | 0.32432            | 0.10811       | 0.42857                 | 0.39286            | 0.17857       |
|               | 35-39     | 0.51515                 | 0.24242            | 0.24242       | 0.42553                 | 0.27660            | 0.29787       |

| Departments   | Age group     | Not- overweight in 2005 | Overweight in 2005 | Obese in 2005 | Not- overweight in 2010 | Overweight in 2010 | Obese in 2010 |
|---------------|---------------|-------------------------|--------------------|---------------|-------------------------|--------------------|---------------|
|               | 40-44         | 0.34211                 | 0.52632            | 0.13158       | 0.40299                 | 0.38806            | 0.20896       |
|               | 45-49         | 0.50000                 | 0.25000            | 0.25000       | 0.43243                 | 0.37838            | 0.18919       |
|               | 50-54         | 0.20000                 | 0.50000            | 0.30000       | 0.35714                 | 0.35714            | 0.28571       |
|               | 55-59         | 0.42857                 | 0.28571            | 0.28571       | 0.43750                 | 0.25000            | 0.31250       |
| Department 85 | 0-4           | 0.77778                 | 0.20635            | 0.01587       | 0.80822                 | 0.17808            | 0.01370       |
|               | 5-9           | 0.95122                 | 0.04878            | 0.00000       | 0.85366                 | 0.10976            | 0.03659       |
|               | 10-14         | 0.86111                 | 0.13889            | 0.00000       | 0.89189                 | 0.08108            | 0.02703       |
|               | 15-19         | 0.78261                 | 0.17391            | 0.04348       | 0.87037                 | 0.12963            | 0.00000       |
|               | 20-24         | 0.75000                 | 0.20000            | 0.05000       | 0.71667                 | 0.25000            | 0.03333       |
|               | 25-29         | 0.77273                 | 0.13636            | 0.09091       | 0.51020                 | 0.36735            | 0.12245       |
|               | 30-34         | 0.51724                 | 0.34483            | 0.13793       | 0.33333                 | 0.41667            | 0.25000       |
|               | 35-39         | 0.39130                 | 0.47826            | 0.13043       | 0.38095                 | 0.50000            | 0.11905       |
|               | 40-44         | 0.36364                 | 0.45455            | 0.18182       | 0.40741                 | 0.40741            | 0.18519       |
|               | 45-49         | 0.50000                 | 0.50000            | 0.00000       | 0.50000                 | 0.37500            | 0.12500       |
|               | 50-54         | 0.33333                 | 0.40000            | 0.26667       | 0.21053                 | 0.47368            | 0.31579       |
|               | 55-59         | 0.33333                 | 0.33333            | 0.33333       | 0.18182                 | 0.45455            | 0.36364       |
|               | Department 86 | 0-4                     | 0.78788            | 0.16667       | 0.04545                 | 0.78125            | 0.18750       |
| 5-9           |               | 0.75862                 | 0.18966            | 0.05172       | 0.81818                 | 0.12121            | 0.06061       |
| 10-14         |               | 0.79630                 | 0.12963            | 0.07407       | 0.86667                 | 0.12000            | 0.01333       |
| 15-19         |               | 0.68889                 | 0.15556            | 0.15556       | 0.84685                 | 0.11712            | 0.03604       |
| 20-24         |               | 0.73333                 | 0.11111            | 0.15556       | 0.67593                 | 0.26852            | 0.05556       |
| 25-29         |               | 0.59091                 | 0.34091            | 0.06818       | 0.49505                 | 0.37624            | 0.12871       |
| 30-34         |               | 0.43590                 | 0.48718            | 0.07692       | 0.48684                 | 0.40789            | 0.10526       |
| 35-39         |               | 0.44828                 | 0.41379            | 0.13793       | 0.48438                 | 0.37500            | 0.14063       |
| 40-44         |               | 0.33333                 | 0.50000            | 0.16667       | 0.42105                 | 0.28070            | 0.29825       |
| 45-49         |               | 0.36842                 | 0.42105            | 0.21053       | 0.22500                 | 0.47500            | 0.30000       |
| 50-54         |               | 0.33333                 | 0.46667            | 0.20000       | 0.25806                 | 0.54839            | 0.19355       |
| 55-59         |               | 0.00000                 | 0.33333            | 0.66667       | 0.26667                 | 0.50000            | 0.23333       |
| Department 91 |               | 0-4                     | 0.76748            | 0.19187       | 0.04065                 | 0.73006            | 0.23313       |
|               | 5-9           | 0.85308                 | 0.09005            | 0.05687       | 0.85789                 | 0.10526            | 0.03684       |
|               | 10-14         | 0.82573                 | 0.13278            | 0.04149       | 0.76119                 | 0.15672            | 0.08209       |
|               | 15-19         | 0.87772                 | 0.10326            | 0.01902       | 0.83784                 | 0.14865            | 0.01351       |
|               | 20-24         | 0.78268                 | 0.16469            | 0.05263       | 0.57600                 | 0.36000            | 0.06400       |
|               | 25-29         | 0.61024                 | 0.27394            | 0.11581       | 0.44554                 | 0.40594            | 0.14851       |
|               | 30-34         | 0.52577                 | 0.32216            | 0.15206       | 0.44211                 | 0.40000            | 0.15789       |
|               | 35-39         | 0.50535                 | 0.35027            | 0.14439       | 0.38889                 | 0.47222            | 0.13889       |
|               | 40-44         | 0.42781                 | 0.37968            | 0.19251       | 0.32000                 | 0.46667            | 0.21333       |
|               | 45-49         | 0.39308                 | 0.39623            | 0.21069       | 0.13043                 | 0.56522            | 0.30435       |
|               | 50-54         | 0.37638                 | 0.36162            | 0.26199       | 0.30952                 | 0.35714            | 0.33333       |
|               | 55-59         | 0.37879                 | 0.41919            | 0.20202       | 0.32258                 | 0.41935            | 0.25806       |
|               | Department 94 | 0-4                     | 0.76748            | 0.19187       | 0.04065                 | 0.69231            | 0.30769       |
| 5-9           |               | 0.85308                 | 0.09005            | 0.05687       | 0.66667                 | 0.22222            | 0.11111       |
| 10-14         |               | 0.82573                 | 0.13278            | 0.04149       | 0.52174                 | 0.26087            | 0.21739       |
| 15-19         |               | 0.87772                 | 0.10326            | 0.01902       | 0.76923                 | 0.23077            | 0.00000       |
| 20-24         |               | 0.78268                 | 0.16469            | 0.05263       | 0.37500                 | 0.50000            | 0.12500       |

| Departments          | Age group | Not- overweight in 2005 | Overweight in 2005 | Obese in 2005 | Not- overweight in 2010 | Overweight in 2010 | Obese in 2010 |
|----------------------|-----------|-------------------------|--------------------|---------------|-------------------------|--------------------|---------------|
|                      | 25-29     | 0.61024                 | 0.27394            | 0.11581       | 0.50000                 | 0.40000            | 0.10000       |
|                      | 30-34     | 0.52577                 | 0.32216            | 0.15206       | 0.46667                 | 0.26667            | 0.26667       |
|                      | 35-39     | 0.50535                 | 0.35027            | 0.14439       | 0.26316                 | 0.57895            | 0.15789       |
|                      | 40-44     | 0.42781                 | 0.37968            | 0.19251       | 0.25000                 | 0.43750            | 0.31250       |
|                      | 45-49     | 0.39308                 | 0.39623            | 0.21069       | 0.08333                 | 0.25000            | 0.66667       |
|                      | 50-54     | 0.37638                 | 0.36162            | 0.26199       | 0.27273                 | 0.27273            | 0.45455       |
|                      | 55-59     | 0.37879                 | 0.41919            | 0.20202       | 0.30000                 | 0.30000            | 0.40000       |
| <b>Department 95</b> | 0-4       | 0.76748                 | 0.19187            | 0.04065       | 0.68681                 | 0.24725            | 0.06593       |
|                      | 5-9       | 0.85308                 | 0.09005            | 0.05687       | 0.71345                 | 0.16959            | 0.11696       |
|                      | 10-14     | 0.82573                 | 0.13278            | 0.04149       | 0.79237                 | 0.17373            | 0.03390       |
|                      | 15-19     | 0.87772                 | 0.10326            | 0.01902       | 0.80303                 | 0.15152            | 0.04545       |
|                      | 20-24     | 0.78268                 | 0.16469            | 0.05263       | 0.62609                 | 0.26087            | 0.11304       |
|                      | 25-29     | 0.61024                 | 0.27394            | 0.11581       | 0.44681                 | 0.39362            | 0.15957       |
|                      | 30-34     | 0.52577                 | 0.32216            | 0.15206       | 0.37079                 | 0.35955            | 0.26966       |
|                      | 35-39     | 0.50535                 | 0.35027            | 0.14439       | 0.28000                 | 0.51000            | 0.21000       |
|                      | 40-44     | 0.42781                 | 0.37968            | 0.19251       | 0.15000                 | 0.43750            | 0.41250       |
|                      | 45-49     | 0.39308                 | 0.39623            | 0.21069       | 0.36364                 | 0.29870            | 0.33766       |
|                      | 50-54     | 0.37638                 | 0.36162            | 0.26199       | 0.14286                 | 0.39683            | 0.46032       |
|                      | 55-59     | 0.37879                 | 0.41919            | 0.20202       | 0.29268                 | 0.34146            | 0.36585       |
| <b>Department 97</b> | 0-4       | 0.76793                 | 0.18987            | 0.04219       | 0.49000                 | 0.40500            | 0.10500       |
|                      | 5-9       | 0.83043                 | 0.15217            | 0.01739       | 0.71739                 | 0.24348            | 0.03913       |
|                      | 10-14     | 0.86347                 | 0.12915            | 0.00738       | 0.78995                 | 0.19635            | 0.01370       |
|                      | 15-19     | 0.84264                 | 0.13706            | 0.02030       | 0.79000                 | 0.20500            | 0.00500       |
|                      | 20-24     | 0.76471                 | 0.20588            | 0.02941       | 0.73109                 | 0.21008            | 0.05882       |
|                      | 25-29     | 0.64894                 | 0.29787            | 0.05319       | 0.49451                 | 0.38462            | 0.12088       |
|                      | 30-34     | 0.44898                 | 0.38776            | 0.16327       | 0.46914                 | 0.40741            | 0.12346       |
|                      | 35-39     | 0.46237                 | 0.39785            | 0.13978       | 0.33784                 | 0.50000            | 0.16216       |
|                      | 40-44     | 0.50000                 | 0.41667            | 0.08333       | 0.27941                 | 0.54412            | 0.17647       |
|                      | 45-49     | 0.35714                 | 0.45238            | 0.19048       | 0.38961                 | 0.40260            | 0.20779       |
|                      | 50-54     | 0.36667                 | 0.48333            | 0.15000       | 0.28571                 | 0.50649            | 0.20779       |
|                      | 55-59     | 0.41463                 | 0.34146            | 0.24390       | 0.27273                 | 0.48485            | 0.24242       |
| <b>Department 99</b> | 0-4       | 0.78125                 | 0.18125            | 0.03750       | 0.84120                 | 0.12876            | 0.03004       |
|                      | 5-9       | 0.85714                 | 0.11111            | 0.03175       | 0.78109                 | 0.18408            | 0.03483       |
|                      | 10-14     | 0.82635                 | 0.13772            | 0.03593       | 0.76498                 | 0.17512            | 0.05991       |
|                      | 15-19     | 0.79200                 | 0.12800            | 0.08000       | 0.81106                 | 0.14747            | 0.04147       |
|                      | 20-24     | 0.72152                 | 0.20253            | 0.07595       | 0.61314                 | 0.32117            | 0.06569       |
|                      | 25-29     | 0.55446                 | 0.32673            | 0.11881       | 0.46094                 | 0.42188            | 0.11719       |
|                      | 30-34     | 0.46429                 | 0.38095            | 0.15476       | 0.43860                 | 0.37719            | 0.18421       |
|                      | 35-39     | 0.36000                 | 0.40000            | 0.24000       | 0.27451                 | 0.54902            | 0.17647       |
|                      | 40-44     | 0.37097                 | 0.35484            | 0.27419       | 0.29213                 | 0.43820            | 0.26966       |
|                      | 45-49     | 0.25862                 | 0.41379            | 0.32759       | 0.33333                 | 0.38710            | 0.27957       |
|                      | 50-54     | 0.36667                 | 0.35000            | 0.28333       | 0.27778                 | 0.51852            | 0.20370       |
|                      | 55-59     | 0.17857                 | 0.67857            | 0.14286       | 0.34783                 | 0.43478            | 0.21739       |

**Table 154. Prevalent rates of middle socioeconomic status population by age group, and body mass index category (Orinoquia y Amazonia region)**

| Departments   | Age group | Not- overweight in 2005 | Overweight in 2005 | Obese in 2005 | Not- overweight in 2010 | Overweight in 2010 | Obese in 2010 |
|---------------|-----------|-------------------------|--------------------|---------------|-------------------------|--------------------|---------------|
| Department 81 | 0-4       | 0.74444                 | 0.24444            | 0.01111       | 0.76860                 | 0.16529            | 0.06612       |
|               | 5-9       | 0.79070                 | 0.16279            | 0.04651       | 0.80451                 | 0.13534            | 0.06015       |
|               | 10-14     | 0.77632                 | 0.17105            | 0.05263       | 0.76056                 | 0.19014            | 0.04930       |
|               | 15-19     | 0.77465                 | 0.16901            | 0.05634       | 0.80000                 | 0.14615            | 0.05385       |
|               | 20-24     | 0.71014                 | 0.21739            | 0.07246       | 0.62366                 | 0.24731            | 0.12903       |
|               | 25-29     | 0.50000                 | 0.37500            | 0.12500       | 0.45882                 | 0.38824            | 0.15294       |
|               | 30-34     | 0.35714                 | 0.48214            | 0.16071       | 0.35106                 | 0.41489            | 0.23404       |
|               | 35-39     | 0.31481                 | 0.40741            | 0.27778       | 0.40506                 | 0.40506            | 0.18987       |
|               | 40-44     | 0.33333                 | 0.30952            | 0.35714       | 0.26761                 | 0.50704            | 0.22535       |
|               | 45-49     | 0.16667                 | 0.58333            | 0.25000       | 0.23881                 | 0.43284            | 0.32836       |
|               | 50-54     | 0.30769                 | 0.50000            | 0.19231       | 0.26190                 | 0.45238            | 0.28571       |
| 55-59         | 0.40000   | 0.26667                 | 0.33333            | 0.26667       | 0.33333                 | 0.40000            |               |
| Department 85 | 0-4       | 0.84615                 | 0.13846            | 0.01538       | 0.77419                 | 0.18548            | 0.04032       |
|               | 5-9       | 0.82609                 | 0.13043            | 0.04348       | 0.75000                 | 0.20833            | 0.04167       |
|               | 10-14     | 0.81034                 | 0.12069            | 0.06897       | 0.79688                 | 0.15625            | 0.04688       |
|               | 15-19     | 0.80000                 | 0.18000            | 0.02000       | 0.82243                 | 0.13084            | 0.04673       |
|               | 20-24     | 0.66667                 | 0.24074            | 0.09259       | 0.69231                 | 0.20513            | 0.10256       |
|               | 25-29     | 0.48387                 | 0.38710            | 0.12903       | 0.52222                 | 0.31111            | 0.16667       |
|               | 30-34     | 0.68421                 | 0.21053            | 0.10526       | 0.35065                 | 0.40260            | 0.24675       |
|               | 35-39     | 0.32258                 | 0.58065            | 0.09677       | 0.33766                 | 0.46753            | 0.19481       |
|               | 40-44     | 0.36000                 | 0.36000            | 0.28000       | 0.29630                 | 0.33333            | 0.37037       |
|               | 45-49     | 0.16667                 | 0.58333            | 0.25000       | 0.19048                 | 0.52381            | 0.28571       |
|               | 50-54     | 0.22222                 | 0.44444            | 0.33333       | 0.26471                 | 0.26471            | 0.47059       |
| 55-59         | 0.29412   | 0.23529                 | 0.47059            | 0.24138       | 0.44828                 | 0.31034            |               |
| Department 86 | 0-4       | 0.76190                 | 0.15873            | 0.07937       | 0.76389                 | 0.18056            | 0.05556       |
|               | 5-9       | 0.85294                 | 0.11765            | 0.02941       | 0.75824                 | 0.15385            | 0.08791       |
|               | 10-14     | 0.72222                 | 0.19444            | 0.08333       | 0.74026                 | 0.23377            | 0.02597       |
|               | 15-19     | 0.77273                 | 0.18182            | 0.04545       | 0.83784                 | 0.10811            | 0.05405       |
|               | 20-24     | 0.60000                 | 0.28889            | 0.11111       | 0.64789                 | 0.29577            | 0.05634       |
|               | 25-29     | 0.62745                 | 0.25490            | 0.11765       | 0.59524                 | 0.33333            | 0.07143       |
|               | 30-34     | 0.31111                 | 0.44444            | 0.24444       | 0.37705                 | 0.40984            | 0.21311       |
|               | 35-39     | 0.31707                 | 0.48780            | 0.19512       | 0.29787                 | 0.48936            | 0.21277       |
|               | 40-44     | 0.33333                 | 0.40741            | 0.25926       | 0.32075                 | 0.50943            | 0.16981       |
|               | 45-49     | 0.30000                 | 0.45000            | 0.25000       | 0.25581                 | 0.48837            | 0.25581       |
|               | 50-54     | 0.17391                 | 0.39130            | 0.43478       | 0.25000                 | 0.46429            | 0.28571       |
| 55-59         | 0.11111   | 0.38889                 | 0.50000            | 0.26667       | 0.60000                 | 0.13333            |               |
| Department 91 | 0-4       | 0.78824                 | 0.17059            | 0.04118       | 0.81250                 | 0.12500            | 0.06250       |
|               | 5-9       | 0.89655                 | 0.08621            | 0.01724       | 0.66667                 | 0.25000            | 0.08333       |
|               | 10-14     | 0.89041                 | 0.08219            | 0.02740       | 0.78049                 | 0.12195            | 0.09756       |
|               | 15-19     | 0.86813                 | 0.12088            | 0.01099       | 0.85000                 | 0.12500            | 0.02500       |

| Departments              | Age group  | Not- overweight<br>in 2005 | Overweight<br>in 2005 | Obese in<br>2005 | Not- overweight<br>in 2010 | Overweight<br>in 2010 | Obese in<br>2010 |
|--------------------------|------------|----------------------------|-----------------------|------------------|----------------------------|-----------------------|------------------|
|                          | 20-24      | 0.81065                    | 0.12426               | 0.06509          | 0.77419                    | 0.06452               | 0.16129          |
|                          | 25-29      | 0.63830                    | 0.24823               | 0.11348          | 0.51724                    | 0.37931               | 0.10345          |
|                          | 30-34      | 0.53846                    | 0.36538               | 0.09615          | 0.36842                    | 0.34211               | 0.28947          |
|                          | 35-39      | 0.56075                    | 0.30841               | 0.13084          | 0.40000                    | 0.40000               | 0.20000          |
|                          | 40-44      | 0.35238                    | 0.45714               | 0.19048          | 0.38889                    | 0.33333               | 0.27778          |
|                          | 45-49      | 0.37374                    | 0.45455               | 0.17172          | 0.13793                    | 0.48276               | 0.37931          |
|                          | 50-54      | 0.37143                    | 0.37143               | 0.25714          | 0.07692                    | 0.50000               | 0.42308          |
|                          | 55-59      | 0.54000                    | 0.32000               | 0.14000          | 0.20000                    | 0.53333               | 0.26667          |
| <b>Department<br/>94</b> | 0-4        | 0.78824                    | 0.17059               | 0.04118          | 0.74359                    | 0.20940               | 0.04701          |
|                          | 5-9        | 0.89655                    | 0.08621               | 0.01724          | 0.71642                    | 0.20398               | 0.07960          |
|                          | 10-14      | 0.89041                    | 0.08219               | 0.02740          | 0.76132                    | 0.15638               | 0.08230          |
|                          | 15-19      | 0.86813                    | 0.12088               | 0.01099          | 0.72487                    | 0.22222               | 0.05291          |
|                          | 20-24      | 0.81065                    | 0.12426               | 0.06509          | 0.61940                    | 0.29104               | 0.08955          |
|                          | 25-29      | 0.63830                    | 0.24823               | 0.11348          | 0.37162                    | 0.41216               | 0.21622          |
|                          | 30-34      | 0.53846                    | 0.36538               | 0.09615          | 0.34375                    | 0.46094               | 0.19531          |
|                          | 35-39      | 0.56075                    | 0.30841               | 0.13084          | 0.33333                    | 0.39048               | 0.27619          |
|                          | 40-44      | 0.35238                    | 0.45714               | 0.19048          | 0.20000                    | 0.45000               | 0.35000          |
|                          | 45-49      | 0.37374                    | 0.45455               | 0.17172          | 0.34146                    | 0.36585               | 0.29268          |
|                          | 50-54      | 0.37143                    | 0.37143               | 0.25714          | 0.18421                    | 0.52632               | 0.28947          |
|                          | 55-59      | 0.54000                    | 0.32000               | 0.14000          | 0.30357                    | 0.44643               | 0.25000          |
| <b>Department<br/>95</b> | 0-4        | 0.78824                    | 0.17059               | 0.04118          | 0.50000                    | 0.31818               | 0.18182          |
|                          | 5-9        | 0.89655                    | 0.08621               | 0.01724          | 0.71429                    | 0.20000               | 0.08571          |
|                          | 10-14      | 0.89041                    | 0.08219               | 0.02740          | 0.77419                    | 0.12903               | 0.09677          |
|                          | 15-19      | 0.86813                    | 0.12088               | 0.01099          | 0.77778                    | 0.11111               | 0.11111          |
|                          | 20-24      | 0.81065                    | 0.12426               | 0.06509          | 0.69565                    | 0.26087               | 0.04348          |
|                          | 25-29      | 0.63830                    | 0.24823               | 0.11348          | 0.46154                    | 0.38462               | 0.15385          |
|                          | 30-34      | 0.53846                    | 0.36538               | 0.09615          | 0.28571                    | 0.57143               | 0.14286          |
|                          | 35-39      | 0.56075                    | 0.30841               | 0.13084          | 0.26667                    | 0.40000               | 0.33333          |
|                          | 40-44      | 0.35238                    | 0.45714               | 0.19048          | 0.12000                    | 0.40000               | 0.48000          |
|                          | 45-49      | 0.37374                    | 0.45455               | 0.17172          | 0.16000                    | 0.36000               | 0.48000          |
|                          | 50-54      | 0.37143                    | 0.37143               | 0.25714          | 0.08333                    | 0.58333               | 0.33333          |
|                          | 55-59      | 0.54000                    | 0.32000               | 0.14000          | 0.18182                    | 0.36364               | 0.45455          |
| <b>Department<br/>97</b> | 0-4        | 0.66667                    | 0.33333               | 0.00000          | 0.42857                    | 0.28571               | 0.28571          |
|                          | 5-9        | 0.76471                    | 0.17647               | 0.05882          | 0.50000                    | 0.50000               | 0.00000          |
|                          | 10-14      | 0.84615                    | 0.15385               | 0.00000          | 0.71429                    | 0.28571               | 0.00000          |
|                          | 15-19      | 0.75000                    | 0.25000               | 0.00000          | 0.66667                    | 0.33333               | 0.00000          |
|                          | 20-24      | 0.76923                    | 0.23077               | 0.00000          | 1.00000                    | 0.00000               | 0.00000          |
|                          | 25-29      | 0.66667                    | 0.33333               | 0.00000          | 0.57143                    | 0.42857               | 0.00000          |
|                          | 30-34      | 0.30000                    | 0.55000               | 0.15000          | 0.40000                    | 0.40000               | 0.20000          |
|                          | 35-39      | 0.50000                    | 0.35714               | 0.14286          | 0.33333                    | 0.50000               | 0.16667          |
|                          | 40-44      | 0.45000                    | 0.35000               | 0.20000          | 0.33333                    | 0.00000               | 0.66667          |
|                          | 45-49      | 0.52632                    | 0.31579               | 0.15789          | 0.00000                    | 0.66667               | 0.33333          |
|                          | 50-54      | 0.22222                    | 0.77778               | 0.00000          | 1.00000                    | 0.00000               | 0.00000          |
|                          | 55-59      | 0.37500                    | 0.62500               | 0.00000          | 0.20000                    | 0.20000               | 0.60000          |
| <b>Department</b>        | <b>0-4</b> | 0.73529                    | 0.20588               | 0.05882          | 0.80000                    | 0.10000               | 0.10000          |

| Departments | Age group | Not- overweight in 2005 | Overweight in 2005 | Obese in 2005 | Not- overweight in 2010 | Overweight in 2010 | Obese in 2010 |
|-------------|-----------|-------------------------|--------------------|---------------|-------------------------|--------------------|---------------|
| 99          | 5-9       | 0.80000                 | 0.14000            | 0.06000       | 0.63636                 | 0.36364            | 0.00000       |
|             | 10-14     | 0.75000                 | 0.15385            | 0.09615       | 0.78571                 | 0.14286            | 0.07143       |
|             | 15-19     | 0.82927                 | 0.14634            | 0.02439       | 0.50000                 | 0.50000            | 0.00000       |
|             | 20-24     | 0.80000                 | 0.15000            | 0.05000       | 0.44444                 | 0.55556            | 0.00000       |
|             | 25-29     | 0.51724                 | 0.31034            | 0.17241       | 0.64286                 | 0.14286            | 0.21429       |
|             | 30-34     | 0.39394                 | 0.39394            | 0.21212       | 0.22222                 | 0.66667            | 0.11111       |
|             | 35-39     | 0.25806                 | 0.38710            | 0.35484       | 0.25000                 | 0.50000            | 0.25000       |
|             | 40-44     | 0.14706                 | 0.38235            | 0.47059       | 0.00000                 | 0.14286            | 0.85714       |
|             | 45-49     | 0.35294                 | 0.38235            | 0.26471       | 0.10000                 | 0.40000            | 0.50000       |
|             | 50-54     | 0.27273                 | 0.40909            | 0.31818       | 0.33333                 | 0.33333            | 0.33333       |
|             | 55-59     | 0.20000                 | 0.60000            | 0.20000       | 0.50000                 | 0.25000            | 0.25000       |

**Table 155. Prevalent rates of higher socioeconomic status population by age group, and body mass index category (Orinoquia y Amazonia region)**

| Departments   | Age group | Not- overweight in 2005 | Overweight in 2005 | Obese in 2005 | Not- overweight in 2010 | Overweight in 2010 | Obese in 2010 |
|---------------|-----------|-------------------------|--------------------|---------------|-------------------------|--------------------|---------------|
| Department 81 | 0-4       | 0.84211                 | 0.10526            | 0.05263       | 0.64286                 | 0.21429            | 0.14286       |
|               | 5-9       | 0.77551                 | 0.16327            | 0.06122       | 0.62500                 | 0.20833            | 0.16667       |
|               | 10-14     | 0.81356                 | 0.08475            | 0.10169       | 0.60606                 | 0.36364            | 0.03030       |
|               | 15-19     | 0.73077                 | 0.17308            | 0.09615       | 0.67857                 | 0.25000            | 0.07143       |
|               | 20-24     | 0.71111                 | 0.24444            | 0.04444       | 0.55556                 | 0.33333            | 0.11111       |
|               | 25-29     | 0.52632                 | 0.31579            | 0.15789       | 0.46154                 | 0.38462            | 0.15385       |
|               | 30-34     | 0.44231                 | 0.32692            | 0.23077       | 0.31579                 | 0.47368            | 0.21053       |
|               | 35-39     | 0.34000                 | 0.44000            | 0.22000       | 0.23333                 | 0.60000            | 0.16667       |
|               | 40-44     | 0.19298                 | 0.38596            | 0.42105       | 0.21429                 | 0.60714            | 0.17857       |
|               | 45-49     | 0.22449                 | 0.46939            | 0.30612       | 0.18182                 | 0.54545            | 0.27273       |
|               | 50-54     | 0.22581                 | 0.35484            | 0.41935       | 0.30435                 | 0.26087            | 0.43478       |
| 55-59         | 0.10000   | 0.35000                 | 0.55000            | 0.20000       | 0.40000                 | 0.40000            |               |
| Department 85 | 0-4       | 0.78431                 | 0.15686            | 0.05882       | 0.84932                 | 0.10959            | 0.04110       |
|               | 5-9       | 0.80000                 | 0.12727            | 0.07273       | 0.82243                 | 0.08411            | 0.09346       |
|               | 10-14     | 0.81356                 | 0.16949            | 0.01695       | 0.72277                 | 0.21782            | 0.05941       |
|               | 15-19     | 0.84375                 | 0.14063            | 0.01563       | 0.77174                 | 0.18478            | 0.04348       |
|               | 20-24     | 0.80882                 | 0.14706            | 0.04412       | 0.68852                 | 0.24590            | 0.06557       |
|               | 25-29     | 0.61765                 | 0.27941            | 0.10294       | 0.49275                 | 0.36232            | 0.14493       |
|               | 30-34     | 0.45652                 | 0.43478            | 0.10870       | 0.38028                 | 0.45070            | 0.16901       |
|               | 35-39     | 0.22000                 | 0.58000            | 0.20000       | 0.16923                 | 0.53846            | 0.29231       |
|               | 40-44     | 0.20930                 | 0.37209            | 0.41860       | 0.28125                 | 0.42188            | 0.29688       |
|               | 45-49     | 0.27907                 | 0.46512            | 0.25581       | 0.15873                 | 0.60317            | 0.23810       |
|               | 50-54     | 0.21875                 | 0.59375            | 0.18750       | 0.21569                 | 0.56863            | 0.21569       |
| 55-59         | 0.18182   | 0.54545                 | 0.27273            | 0.14286       | 0.50000                 | 0.35714            |               |
| Department 91 | 0-4       | 0.72826                 | 0.20652            | 0.06522       | 1.00000                 | 0.00000            | 0.00000       |
|               | 5-9       | 0.74390                 | 0.13415            | 0.12195       | 0.20000                 | 0.80000            | 0.00000       |
|               | 10-14     | 0.68132                 | 0.24176            | 0.07692       | 0.44444                 | 0.33333            | 0.22222       |
|               | 15-19     | 0.81379                 | 0.14483            | 0.04138       | 0.28571                 | 0.57143            | 0.14286       |



| Departments | Age group | Not- overweight in 2005 | Overweight in 2005 | Obese in 2005 | Not- overweight in 2010 | Overweight in 2010 | Obese in 2010 |
|-------------|-----------|-------------------------|--------------------|---------------|-------------------------|--------------------|---------------|
|             | 20-24     | 0.72961                 | 0.20601            | 0.06438       | 0.00000                 | 0.00000            | 1.00000       |
|             | 25-29     | 0.60989                 | 0.28022            | 0.10989       | 0.20000                 | 0.80000            | 0.00000       |
|             | 30-34     | 0.41808                 | 0.36158            | 0.22034       | 0.00000                 | 0.80000            | 0.20000       |
|             | 35-39     | 0.40000                 | 0.42581            | 0.17419       | 0.00000                 | 0.60000            | 0.40000       |
|             | 40-44     | 0.35526                 | 0.39474            | 0.25000       | 0.14286                 | 0.57143            | 0.28571       |
|             | 45-49     | 0.36301                 | 0.41781            | 0.21918       | 0.00000                 | 0.44444            | 0.55556       |
|             | 50-54     | 0.25833                 | 0.42500            | 0.31667       | 0.14286                 | 0.57143            | 0.28571       |
|             | 55-59     | 0.23762                 | 0.53465            | 0.22772       | 0.20000                 | 0.20000            | 0.60000       |

**Table 156. Mortality rates and population size by age group at the department level without segregate by socioeconomic status (Orinoquia y Amazonia region) <sup>†</sup>**

| Departments   | Age group | Mortality rates (R) (%/year) | Not- overweight population in 2005 (Number of people) <sup>1</sup> | Overweight population in 2005 (Number of people) <sup>2</sup> | Obese population in 2005 (Number of people) <sup>3</sup> |
|---------------|-----------|------------------------------|--------------------------------------------------------------------|---------------------------------------------------------------|----------------------------------------------------------|
| Department 81 | 0-4       | 0.00364                      | 14605                                                              | 4029                                                          | 336                                                      |
|               | 5-9       | 0.00035                      | 14077                                                              | 2360                                                          | 674                                                      |
|               | 10-14     | 0.00038                      | 12903                                                              | 2191                                                          | 893                                                      |
|               | 15-19     | 0.00192                      | 10916                                                              | 2408                                                          | 722                                                      |
|               | 20-24     | 0.00369                      | 9600                                                               | 2437                                                          | 960                                                      |
|               | 25-29     | 0.00263                      | 6017                                                               | 3521                                                          | 1472                                                     |
|               | 30-34     | 0.00211                      | 4383                                                               | 3835                                                          | 1712                                                     |
|               | 35-39     | 0.00198                      | 3385                                                               | 3452                                                          | 2257                                                     |
|               | 40-44     | 0.00268                      | 2274                                                               | 3291                                                          | 2633                                                     |
|               | 45-49     | 0.00276                      | 1675                                                               | 3040                                                          | 1799                                                     |
|               | 50-54     | 0.00547                      | 1128                                                               | 2018                                                          | 1425                                                     |
| 55-59         | 0.00801   | 999                          | 1071                                                               | 1427                                                          |                                                          |
| Department 85 | 0-4       | 0.00325                      | 18069                                                              | 3764                                                          | 627                                                      |
|               | 5-9       | 0.00026                      | 19677                                                              | 2530                                                          | 984                                                      |
|               | 10-14     | 0.00047                      | 19071                                                              | 3330                                                          | 757                                                      |
|               | 15-19     | 0.00114                      | 17111                                                              | 3422                                                          | 527                                                      |
|               | 20-24     | 0.00246                      | 13078                                                              | 3366                                                          | 1058                                                     |
|               | 25-29     | 0.00259                      | 10354                                                              | 4786                                                          | 1856                                                     |
|               | 30-34     | 0.00271                      | 8511                                                               | 5216                                                          | 1785                                                     |
|               | 35-39     | 0.00228                      | 4173                                                               | 8068                                                          | 2226                                                     |
|               | 40-44     | 0.00230                      | 3519                                                               | 4737                                                          | 3925                                                     |
|               | 45-49     | 0.00254                      | 2577                                                               | 4786                                                          | 2086                                                     |
|               | 50-54     | 0.00430                      | 1776                                                               | 3664                                                          | 1776                                                     |
| 55-59         | 0.00946   | 1344                         | 2199                                                               | 1955                                                          |                                                          |
| Department 86 | 0-4       | 0.00300                      | 12885                                                              | 2726                                                          | 743                                                      |
|               | 5-9       | 0.00024                      | 12709                                                              | 3177                                                          | 867                                                      |
|               | 10-14     | 0.00012                      | 13359                                                              | 2175                                                          | 1243                                                     |
|               | 15-19     | 0.00175                      | 10227                                                              | 2309                                                          | 2309                                                     |

|    |                   |              |         |      |      |      |
|----|-------------------|--------------|---------|------|------|------|
| 1  |                   |              |         |      |      |      |
| 2  |                   |              |         |      |      |      |
| 3  |                   | <b>20-24</b> | 0.00407 | 9901 | 1500 | 2100 |
| 4  |                   | <b>25-29</b> | 0.00274 | 6891 | 3975 | 795  |
| 5  |                   | <b>30-34</b> | 0.00449 | 4081 | 4561 | 720  |
| 6  |                   | <b>35-39</b> | 0.00185 | 3885 | 3586 | 1195 |
| 7  |                   | <b>40-44</b> | 0.00284 | 2349 | 3524 | 1175 |
| 8  |                   | <b>45-49</b> | 0.00373 | 2073 | 2369 | 1185 |
| 9  |                   | <b>50-54</b> | 0.00636 | 1416 | 1982 | 850  |
| 10 |                   | <b>55-59</b> | 0.00633 | 0    | 1053 | 2105 |
| 11 |                   |              |         |      |      |      |
| 12 |                   |              |         |      |      |      |
| 13 | <b>Department</b> | <b>0-4</b>   | 0.01074 | 2249 | 417  | 126  |
| 14 | <b>91</b>         | <b>5-9</b>   | 0.00087 | 2795 | 559  | 107  |
| 15 |                   | <b>10-14</b> | 0.00080 | 2857 | 701  | 202  |
| 16 |                   | <b>15-19</b> | 0.00107 | 3027 | 520  | 173  |
| 17 |                   | <b>20-24</b> | 0.00129 | 1529 | 573  | 225  |
| 18 |                   | <b>25-29</b> | 0.00428 | 834  | 532  | 271  |
| 19 |                   | <b>30-34</b> | 0.00412 | 654  | 654  | 393  |
| 20 |                   | <b>35-39</b> | 0.00183 | 553  | 654  | 428  |
| 21 |                   | <b>40-44</b> | 0.00280 | 442  | 673  | 315  |
| 22 |                   | <b>45-49</b> | 0.00286 | 244  | 435  | 371  |
| 23 |                   | <b>50-54</b> | 0.00626 | 167  | 395  | 237  |
| 24 |                   | <b>55-59</b> | 0.00954 | 177  | 184  | 163  |
| 25 |                   |              |         |      |      |      |
| 26 | <b>Department</b> | <b>0-4</b>   | 0.00661 | 1086 | 217  | 59   |
| 27 | <b>94</b>         | <b>5-9</b>   | 0.00182 | 1206 | 301  | 137  |
| 28 |                   | <b>10-14</b> | 0.00000 | 1355 | 306  | 46   |
| 29 |                   | <b>15-19</b> | 0.00073 | 1070 | 251  | 43   |
| 30 |                   | <b>20-24</b> | 0.00531 | 476  | 203  | 74   |
| 31 |                   | <b>25-29</b> | 0.00139 | 403  | 245  | 70   |
| 32 |                   | <b>30-34</b> | 0.00145 | 363  | 234  | 95   |
| 33 |                   | <b>35-39</b> | 0.00151 | 271  | 262  | 129  |
| 34 |                   | <b>40-44</b> | 0.00333 | 216  | 278  | 106  |
| 35 |                   | <b>45-49</b> | 0.00437 | 161  | 166  | 131  |
| 36 |                   | <b>50-54</b> | 0.00797 | 71   | 136  | 43   |
| 37 |                   | <b>55-59</b> | 0.01266 | 87   | 100  | 50   |
| 38 |                   |              |         |      |      |      |
| 39 |                   |              |         |      |      |      |
| 40 | <b>Department</b> | <b>0-4</b>   | 0.00299 | 5634 | 1438 | 293  |
| 41 | <b>95</b>         | <b>5-9</b>   | 0.00041 | 6132 | 1120 | 147  |
| 42 |                   | <b>10-14</b> | 0.00013 | 6800 | 1094 | 78   |
| 43 |                   | <b>15-19</b> | 0.00065 | 5108 | 924  | 109  |
| 44 |                   | <b>20-24</b> | 0.00296 | 2547 | 725  | 110  |
| 45 |                   | <b>25-29</b> | 0.00424 | 1889 | 826  | 118  |
| 46 |                   | <b>30-34</b> | 0.00303 | 1248 | 1248 | 471  |
| 47 |                   | <b>35-39</b> | 0.00339 | 1230 | 1062 | 362  |
| 48 |                   | <b>40-44</b> | 0.00437 | 1333 | 1151 | 262  |
| 49 |                   | <b>45-49</b> | 0.00423 | 742  | 813  | 336  |
| 50 |                   | <b>50-54</b> | 0.00466 | 526  | 780  | 195  |
| 51 |                   | <b>55-59</b> | 0.00302 | 409  | 389  | 195  |
| 52 |                   |              |         |      |      |      |
| 53 |                   |              |         |      |      |      |
| 54 | <b>Department</b> | <b>0-4</b>   | 0.00092 | 1671 | 427  | 87   |
| 55 | <b>97</b>         | <b>5-9</b>   | 0.00100 | 1659 | 303  | 40   |
| 56 |                   | <b>10-14</b> | 0.00050 | 1697 | 273  | 20   |
| 57 |                   |              |         |      |      |      |
| 58 |                   |              |         |      |      |      |
| 59 |                   |              |         |      |      |      |
| 60 |                   |              |         |      |      |      |

|                      |              |         |      |     |     |
|----------------------|--------------|---------|------|-----|-----|
|                      | <b>15-19</b> | 0.00000 | 1512 | 274 | 32  |
|                      | <b>20-24</b> | 0.00096 | 783  | 223 | 34  |
|                      | <b>25-29</b> | 0.00000 | 486  | 213 | 30  |
|                      | <b>30-34</b> | 0.00122 | 346  | 346 | 130 |
|                      | <b>35-39</b> | 0.00127 | 364  | 314 | 107 |
|                      | <b>40-44</b> | 0.00402 | 363  | 313 | 71  |
|                      | <b>45-49</b> | 0.00000 | 236  | 258 | 107 |
|                      | <b>50-54</b> | 0.00233 | 151  | 223 | 56  |
|                      | <b>55-59</b> | 0.00424 | 97   | 93  | 46  |
| <b>Department 99</b> | <b>0-4</b>   | 0.00330 | 2322 | 588 | 118 |
|                      | <b>5-9</b>   | 0.00033 | 2540 | 373 | 108 |
|                      | <b>10-14</b> | 0.00000 | 2525 | 466 | 151 |
|                      | <b>15-19</b> | 0.00000 | 2354 | 395 | 198 |
|                      | <b>20-24</b> | 0.00249 | 1173 | 309 | 123 |
|                      | <b>25-29</b> | 0.00260 | 665  | 349 | 141 |
|                      | <b>30-34</b> | 0.00080 | 570  | 465 | 218 |
|                      | <b>35-39</b> | 0.00170 | 389  | 470 | 317 |
|                      | <b>40-44</b> | 0.00192 | 301  | 401 | 341 |
|                      | <b>45-49</b> | 0.00113 | 256  | 370 | 256 |
|                      | <b>50-54</b> | 0.00163 | 209  | 223 | 180 |
|                      | <b>55-59</b> | 0.00691 | 71   | 273 | 91  |

†Values used in this table are for the urban population

<sup>1</sup> Initial value used in the stock of not-overweight population in 2005.

<sup>2</sup> Initial value used in the stock of overweight population in 2005.

<sup>3</sup> Initial value used in the stock of obese population in 2005.

**Table 157. Mortality rates and population size by age group at the department level for the lower socioeconomic status population (Orinoquia y Amazonia region) †**

| Departments          | Age group    | Mortality rates (R) (%/year) | Not-overweight population in 2005 (Number of people) <sup>1</sup> | Overweight population in 2005 (Number of people) <sup>2</sup> | Obese population in 2005 (Number of people) <sup>3</sup> |
|----------------------|--------------|------------------------------|-------------------------------------------------------------------|---------------------------------------------------------------|----------------------------------------------------------|
| <b>Department 81</b> | <b>0-4</b>   | 0.00364                      | 4952                                                              | 1679                                                          | 0                                                        |
|                      | <b>5-9</b>   | 0.00035                      | 5142                                                              | 506                                                           | 84                                                       |
|                      | <b>10-14</b> | 0.00038                      | 4220                                                              | 730                                                           | 81                                                       |
|                      | <b>15-19</b> | 0.00192                      | 3451                                                              | 722                                                           | 0                                                        |
|                      | <b>20-24</b> | 0.00369                      | 3618                                                              | 517                                                           | 443                                                      |
|                      | <b>25-29</b> | 0.00263                      | 1792                                                              | 640                                                           | 320                                                      |
|                      | <b>30-34</b> | 0.00211                      | 1438                                                              | 822                                                           | 274                                                      |
|                      | <b>35-39</b> | 0.00198                      | 1128                                                              | 531                                                           | 531                                                      |
|                      | <b>40-44</b> | 0.00268                      | 778                                                               | 1197                                                          | 299                                                      |
|                      | <b>45-49</b> | 0.00276                      | 620                                                               | 310                                                           | 310                                                      |
|                      | <b>50-54</b> | 0.00547                      | 237                                                               | 594                                                           | 356                                                      |
|                      | <b>55-59</b> | 0.00801                      | 428                                                               | 285                                                           | 285                                                      |
| <b>Department 85</b> | <b>0-4</b>   | 0.00325                      | 6149                                                              | 1631                                                          | 125                                                      |
|                      | <b>5-9</b>   | 0.00026                      | 5482                                                              | 281                                                           | 0                                                        |
|                      | <b>10-14</b> | 0.00047                      | 4692                                                              | 757                                                           | 0                                                        |

|                      |              |         |      |      |     |
|----------------------|--------------|---------|------|------|-----|
|                      | <b>15-19</b> | 0.00114 | 4739 | 1053 | 263 |
|                      | <b>20-24</b> | 0.00246 | 4327 | 1154 | 288 |
|                      | <b>25-29</b> | 0.00259 | 3321 | 586  | 391 |
|                      | <b>30-34</b> | 0.00271 | 2059 | 1373 | 549 |
|                      | <b>35-39</b> | 0.00228 | 1252 | 1530 | 417 |
|                      | <b>40-44</b> | 0.00230 | 1083 | 1354 | 541 |
|                      | <b>45-49</b> | 0.00254 | 614  | 614  | 0   |
|                      | <b>50-54</b> | 0.00430 | 555  | 666  | 444 |
|                      | <b>55-59</b> | 0.00946 | 244  | 244  | 244 |
| <b>Department 86</b> | <b>0-4</b>   | 0.00300 | 5468 | 1157 | 315 |
|                      | <b>5-9</b>   | 0.00024 | 4277 | 1069 | 292 |
|                      | <b>10-14</b> | 0.00012 | 4268 | 695  | 397 |
|                      | <b>15-19</b> | 0.00175 | 3668 | 828  | 828 |
|                      | <b>20-24</b> | 0.00407 | 3144 | 476  | 667 |
|                      | <b>25-29</b> | 0.00274 | 1934 | 1116 | 223 |
|                      | <b>30-34</b> | 0.00449 | 1125 | 1258 | 199 |
|                      | <b>35-39</b> | 0.00185 | 1163 | 1074 | 358 |
|                      | <b>40-44</b> | 0.00284 | 735  | 1102 | 367 |
|                      | <b>45-49</b> | 0.00373 | 476  | 544  | 272 |
|                      | <b>50-54</b> | 0.00636 | 423  | 593  | 254 |
|                      | <b>55-59</b> | 0.00633 | 0    | 250  | 500 |
| <b>Department 91</b> | <b>0-4</b>   | 0.01074 | 909  | 227  | 48  |
|                      | <b>5-9</b>   | 0.00087 | 993  | 105  | 66  |
|                      | <b>10-14</b> | 0.00080 | 992  | 160  | 50  |
|                      | <b>15-19</b> | 0.00107 | 1171 | 138  | 25  |
|                      | <b>20-24</b> | 0.00129 | 578  | 122  | 39  |
|                      | <b>25-29</b> | 0.00428 | 280  | 126  | 53  |
|                      | <b>30-34</b> | 0.00412 | 247  | 151  | 71  |
|                      | <b>35-39</b> | 0.00183 | 247  | 171  | 71  |
|                      | <b>40-44</b> | 0.00280 | 191  | 170  | 86  |
|                      | <b>45-49</b> | 0.00286 | 95   | 96   | 51  |
|                      | <b>50-54</b> | 0.00626 | 90   | 86   | 63  |
|                      | <b>55-59</b> | 0.00954 | 47   | 52   | 25  |
| <b>Department 94</b> | <b>0-4</b>   | 0.00661 | 444  | 111  | 23  |
|                      | <b>5-9</b>   | 0.00182 | 472  | 50   | 31  |
|                      | <b>10-14</b> | 0.00000 | 450  | 72   | 23  |
|                      | <b>15-19</b> | 0.00073 | 430  | 51   | 9   |
|                      | <b>20-24</b> | 0.00531 | 187  | 39   | 13  |
|                      | <b>25-29</b> | 0.00139 | 123  | 55   | 23  |
|                      | <b>30-34</b> | 0.00145 | 100  | 61   | 29  |
|                      | <b>35-39</b> | 0.00151 | 100  | 69   | 29  |
|                      | <b>40-44</b> | 0.00333 | 80   | 71   | 36  |
|                      | <b>45-49</b> | 0.00437 | 41   | 42   | 22  |
|                      | <b>50-54</b> | 0.00797 | 28   | 27   | 20  |
|                      | <b>55-59</b> | 0.01266 | 21   | 24   | 11  |
| <b>Department 95</b> | <b>0-4</b>   | 0.00299 | 2399 | 600  | 127 |
|                      | <b>5-9</b>   | 0.00041 | 2124 | 224  | 142 |

|                      |              |         |      |     |     |
|----------------------|--------------|---------|------|-----|-----|
|                      | <b>10-14</b> | 0.00013 | 2103 | 338 | 106 |
|                      | <b>15-19</b> | 0.00065 | 1933 | 227 | 42  |
|                      | <b>20-24</b> | 0.00296 | 840  | 177 | 57  |
|                      | <b>25-29</b> | 0.00424 | 485  | 218 | 92  |
|                      | <b>30-34</b> | 0.00303 | 430  | 264 | 124 |
|                      | <b>35-39</b> | 0.00339 | 402  | 278 | 115 |
|                      | <b>40-44</b> | 0.00437 | 368  | 326 | 165 |
|                      | <b>45-49</b> | 0.00423 | 171  | 172 | 91  |
|                      | <b>50-54</b> | 0.00466 | 169  | 162 | 118 |
|                      | <b>55-59</b> | 0.00302 | 89   | 99  | 48  |
| <b>Department 97</b> | <b>0-4</b>   | 0.00092 | 1584 | 392 | 87  |
|                      | <b>5-9</b>   | 0.00100 | 1523 | 279 | 32  |
|                      | <b>10-14</b> | 0.00050 | 1522 | 228 | 13  |
|                      | <b>15-19</b> | 0.00000 | 1335 | 217 | 32  |
|                      | <b>20-24</b> | 0.00096 | 702  | 189 | 27  |
|                      | <b>25-29</b> | 0.00000 | 371  | 170 | 30  |
|                      | <b>30-34</b> | 0.00122 | 287  | 248 | 104 |
|                      | <b>35-39</b> | 0.00127 | 307  | 264 | 93  |
|                      | <b>40-44</b> | 0.00402 | 297  | 247 | 49  |
|                      | <b>45-49</b> | 0.00000 | 169  | 213 | 90  |
| <b>Department 99</b> | <b>0-4</b>   | 0.00233 | 123  | 162 | 50  |
|                      | <b>5-9</b>   | 0.00424 | 79   | 65  | 46  |
|                      | <b>0-4</b>   | 0.00330 | 1004 | 233 | 48  |
|                      | <b>5-9</b>   | 0.00033 | 871  | 113 | 32  |
|                      | <b>10-14</b> | 0.00000 | 830  | 138 | 36  |
|                      | <b>15-19</b> | 0.00000 | 837  | 135 | 85  |
|                      | <b>20-24</b> | 0.00249 | 368  | 103 | 39  |
|                      | <b>25-29</b> | 0.00260 | 180  | 106 | 39  |
|                      | <b>30-34</b> | 0.00080 | 160  | 132 | 53  |
|                      | <b>35-39</b> | 0.00170 | 127  | 141 | 85  |
| <b>Department 81</b> | <b>40-44</b> | 0.00192 | 121  | 116 | 89  |
|                      | <b>45-49</b> | 0.00113 | 52   | 84  | 66  |
|                      | <b>50-54</b> | 0.00163 | 67   | 64  | 52  |
|                      | <b>55-59</b> | 0.00691 | 18   | 70  | 15  |

†Values used in this table are for the urban population

<sup>1</sup> Initial value used in the stock of not-overweight population in 2005 for lower SES.

<sup>2</sup> Initial value used in the stock of overweight population in 2005 for lower SES.

<sup>3</sup> Initial value used in the stock of obese population in 2005 for lower SES.

**Table 158. Mortality rates and population size by age group at the department level for the middle socioeconomic status population (Orinoquia y Amazonia region) †**

| Departments          | Age group  | Mortality rates (R) (%/year) | Not-overweight population in 2005 (Number of people) <sup>1</sup> | Overweight population in 2005 (Number of people) <sup>2</sup> | Obese population in 2005 (Number of people) <sup>3</sup> |
|----------------------|------------|------------------------------|-------------------------------------------------------------------|---------------------------------------------------------------|----------------------------------------------------------|
| <b>Department 81</b> | <b>0-4</b> | 0.00364                      | 5624                                                              | 1847                                                          | 84                                                       |
|                      | <b>5-9</b> | 0.00035                      | 5732                                                              | 1180                                                          | 337                                                      |

|    |                   |              |         |      |      |     |
|----|-------------------|--------------|---------|------|------|-----|
| 1  |                   |              |         |      |      |     |
| 2  |                   |              |         |      |      |     |
| 3  |                   | <b>10-14</b> | 0.00038 | 4788 | 1055 | 325 |
| 4  |                   | <b>15-19</b> | 0.00192 | 4414 | 963  | 321 |
| 5  |                   | <b>20-24</b> | 0.00369 | 3618 | 1108 | 369 |
| 6  |                   | <b>25-29</b> | 0.00263 | 2304 | 1728 | 576 |
| 7  |                   | <b>30-34</b> | 0.00211 | 1370 | 1849 | 616 |
| 8  |                   | <b>35-39</b> | 0.00198 | 1128 | 1460 | 996 |
| 9  |                   | <b>40-44</b> | 0.00268 | 838  | 778  | 898 |
| 10 |                   | <b>45-49</b> | 0.00276 | 372  | 1303 | 558 |
| 11 |                   | <b>50-54</b> | 0.00547 | 475  | 772  | 297 |
| 12 |                   | <b>55-59</b> | 0.00801 | 428  | 285  | 357 |
| 13 |                   |              |         |      |      |     |
| 14 |                   |              |         |      |      |     |
| 15 | <b>Department</b> | <b>0-4</b>   | 0.00325 | 6901 | 1129 | 125 |
| 16 | <b>85</b>         | <b>5-9</b>   | 0.00026 | 8011 | 1265 | 422 |
| 17 |                   | <b>10-14</b> | 0.00047 | 7114 | 1060 | 605 |
| 18 |                   | <b>15-19</b> | 0.00114 | 5265 | 1185 | 132 |
| 19 |                   | <b>20-24</b> | 0.00246 | 3462 | 1250 | 481 |
| 20 |                   | <b>25-29</b> | 0.00259 | 2930 | 2344 | 781 |
| 21 |                   | <b>30-34</b> | 0.00271 | 3569 | 1098 | 549 |
| 22 |                   | <b>35-39</b> | 0.00228 | 1391 | 2504 | 417 |
| 23 |                   | <b>40-44</b> | 0.00230 | 1218 | 1218 | 947 |
| 24 |                   | <b>45-49</b> | 0.00254 | 491  | 1718 | 736 |
| 25 |                   | <b>50-54</b> | 0.00430 | 444  | 888  | 666 |
| 26 |                   | <b>55-59</b> | 0.00946 | 611  | 489  | 977 |
| 27 |                   |              |         |      |      |     |
| 28 |                   |              |         |      |      |     |
| 29 | <b>Department</b> | <b>0-4</b>   | 0.00300 | 3444 | 718  | 359 |
| 30 | <b>86</b>         | <b>5-9</b>   | 0.00024 | 3928 | 542  | 135 |
| 31 |                   | <b>10-14</b> | 0.00012 | 3670 | 988  | 423 |
| 32 |                   | <b>15-19</b> | 0.00175 | 2837 | 667  | 167 |
| 33 |                   | <b>20-24</b> | 0.00407 | 2324 | 1119 | 430 |
| 34 |                   | <b>25-29</b> | 0.00274 | 2298 | 933  | 431 |
| 35 |                   | <b>30-34</b> | 0.00449 | 781  | 1115 | 613 |
| 36 |                   | <b>35-39</b> | 0.00185 | 786  | 1209 | 484 |
| 37 |                   | <b>40-44</b> | 0.00284 | 660  | 806  | 513 |
| 38 |                   | <b>45-49</b> | 0.00373 | 526  | 788  | 438 |
| 39 |                   | <b>50-54</b> | 0.00636 | 191  | 429  | 477 |
| 40 |                   | <b>55-59</b> | 0.00633 | 89   | 310  | 399 |
| 41 |                   |              |         |      |      |     |
| 42 |                   |              |         |      |      |     |
| 43 | <b>Department</b> | <b>0-4</b>   | 0.01074 | 608  | 132  | 32  |
| 44 | <b>91</b>         | <b>5-9</b>   | 0.00087 | 853  | 82   | 16  |
| 45 |                   | <b>10-14</b> | 0.00080 | 1014 | 94   | 31  |
| 46 |                   | <b>15-19</b> | 0.00107 | 799  | 111  | 10  |
| 47 |                   | <b>20-24</b> | 0.00129 | 541  | 83   | 43  |
| 48 |                   | <b>25-29</b> | 0.00428 | 328  | 128  | 58  |
| 49 |                   | <b>30-34</b> | 0.00412 | 246  | 167  | 44  |
| 50 |                   | <b>35-39</b> | 0.00183 | 262  | 144  | 61  |
| 51 |                   | <b>40-44</b> | 0.00280 | 141  | 184  | 76  |
| 52 |                   | <b>45-49</b> | 0.00286 | 122  | 149  | 56  |
| 53 |                   | <b>50-54</b> | 0.00626 | 77   | 77   | 53  |
| 54 |                   | <b>55-59</b> | 0.00954 | 71   | 42   | 19  |
| 55 |                   |              |         |      |      |     |
| 56 | <b>Department</b> | <b>0-4</b>   | 0.00661 | 297  | 64   | 16  |
| 57 |                   |              |         |      |      |     |
| 58 |                   |              |         |      |      |     |
| 59 |                   |              |         |      |      |     |
| 60 |                   |              |         |      |      |     |

|    |            |       |         |      |     |     |
|----|------------|-------|---------|------|-----|-----|
| 1  |            |       |         |      |     |     |
| 2  |            |       |         |      |     |     |
| 3  | 94         | 5-9   | 0.00182 | 405  | 39  | 8   |
| 4  |            | 10-14 | 0.00000 | 460  | 42  | 14  |
| 5  |            | 15-19 | 0.00073 | 293  | 41  | 4   |
| 6  |            | 20-24 | 0.00531 | 175  | 27  | 14  |
| 7  |            | 25-29 | 0.00139 | 144  | 56  | 26  |
| 8  |            | 30-34 | 0.00145 | 100  | 68  | 18  |
| 9  |            | 35-39 | 0.00151 | 106  | 58  | 25  |
| 10 |            | 40-44 | 0.00333 | 59   | 77  | 32  |
| 11 |            | 45-49 | 0.00437 | 53   | 65  | 24  |
| 12 |            | 50-54 | 0.00797 | 24   | 24  | 17  |
| 13 |            | 55-59 | 0.01266 | 32   | 19  | 8   |
| 14 |            |       |         |      |     |     |
| 15 |            |       |         |      |     |     |
| 16 | Department | 0-4   | 0.00299 | 1605 | 347 | 84  |
| 17 | 95         | 5-9   | 0.00041 | 1824 | 175 | 35  |
| 18 |            | 10-14 | 0.00013 | 2150 | 198 | 66  |
| 19 |            | 15-19 | 0.00065 | 1318 | 184 | 17  |
| 20 |            | 20-24 | 0.00296 | 787  | 121 | 63  |
| 21 |            | 25-29 | 0.00424 | 568  | 221 | 101 |
| 22 |            | 30-34 | 0.00303 | 428  | 291 | 76  |
| 23 |            | 35-39 | 0.00339 | 426  | 234 | 99  |
| 24 |            | 40-44 | 0.00437 | 272  | 352 | 147 |
| 25 |            | 45-49 | 0.00423 | 220  | 268 | 101 |
| 26 |            | 50-54 | 0.00466 | 144  | 144 | 100 |
| 27 |            | 55-59 | 0.00302 | 135  | 80  | 35  |
| 28 |            |       |         |      |     |     |
| 29 |            |       |         |      |     |     |
| 30 | Department | 0-4   | 0.00092 | 52   | 26  | 0   |
| 31 | 97         | 5-9   | 0.00100 | 104  | 24  | 8   |
| 32 |            | 10-14 | 0.00050 | 143  | 26  | 0   |
| 33 |            | 15-19 | 0.00000 | 145  | 48  | 0   |
| 34 |            | 20-24 | 0.00096 | 67   | 20  | 0   |
| 35 |            | 25-29 | 0.00000 | 61   | 30  | 0   |
| 36 |            | 30-34 | 0.00122 | 39   | 72  | 20  |
| 37 |            | 35-39 | 0.00127 | 50   | 36  | 14  |
| 38 |            | 40-44 | 0.00402 | 49   | 38  | 22  |
| 39 |            | 45-49 | 0.00000 | 56   | 34  | 17  |
| 40 |            | 50-54 | 0.00233 | 11   | 39  | 0   |
| 41 |            | 55-59 | 0.00424 | 14   | 23  | 0   |
| 42 |            |       |         |      |     |     |
| 43 |            |       |         |      |     |     |
| 44 | Department | 0-4   | 0.00330 | 615  | 172 | 49  |
| 45 | 99         | 5-9   | 0.00033 | 664  | 116 | 50  |
| 46 |            | 10-14 | 0.00000 | 714  | 146 | 92  |
| 47 |            | 15-19 | 0.00000 | 604  | 107 | 18  |
| 48 |            | 20-24 | 0.00249 | 368  | 69  | 23  |
| 49 |            | 25-29 | 0.00260 | 188  | 113 | 63  |
| 50 |            | 30-34 | 0.00080 | 132  | 132 | 71  |
| 51 |            | 35-39 | 0.00170 | 87   | 130 | 119 |
| 52 |            | 40-44 | 0.00192 | 43   | 112 | 138 |
| 53 |            | 45-49 | 0.00113 | 97   | 105 | 73  |
| 54 |            | 50-54 | 0.00163 | 43   | 65  | 50  |
| 55 |            | 55-59 | 0.00691 | 22   | 66  | 22  |
| 56 |            |       |         |      |     |     |
| 57 |            |       |         |      |     |     |
| 58 |            |       |         |      |     |     |
| 59 |            |       |         |      |     |     |
| 60 |            |       |         |      |     |     |

†Values used in this table are for the urban population

1 Initial value used in the stock of not-overweight population in 2005 for middle SES.

2 Initial value used in the stock of overweight population in 2005 for middle SES.

3 Initial value used in the stock of obese population in 2005 for middle SES.

**Table 159. Mortality rates and population size by age group at the department level for the higher socioeconomic status population (Orinoquia y Amazonia region) †**

| Departments   | Age group | Mortality rates (R) (%/year) | Not-overweight population in 2005 (Number of people) <sup>1</sup> | Overweight population in 2005 (Number of people) <sup>2</sup> | Obese population in 2005 (Number of people) <sup>3</sup> |
|---------------|-----------|------------------------------|-------------------------------------------------------------------|---------------------------------------------------------------|----------------------------------------------------------|
| Department 81 | 0-4       | 0.00364                      | 4029                                                              | 504                                                           | 252                                                      |
|               | 5-9       | 0.00035                      | 3203                                                              | 674                                                           | 253                                                      |
|               | 10-14     | 0.00038                      | 3895                                                              | 406                                                           | 487                                                      |
|               | 15-19     | 0.00192                      | 3050                                                              | 722                                                           | 401                                                      |
|               | 20-24     | 0.00369                      | 2363                                                              | 812                                                           | 148                                                      |
|               | 25-29     | 0.00263                      | 1920                                                              | 1152                                                          | 576                                                      |
|               | 30-34     | 0.00211                      | 1575                                                              | 1164                                                          | 822                                                      |
|               | 35-39     | 0.00198                      | 1128                                                              | 1460                                                          | 730                                                      |
|               | 40-44     | 0.00268                      | 658                                                               | 1316                                                          | 1436                                                     |
|               | 45-49     | 0.00276                      | 683                                                               | 1427                                                          | 931                                                      |
| Department 85 | 0-4       | 0.00325                      | 5019                                                              | 1004                                                          | 376                                                      |
|               | 5-9       | 0.00026                      | 6184                                                              | 984                                                           | 562                                                      |
|               | 10-14     | 0.00047                      | 7265                                                              | 1514                                                          | 151                                                      |
|               | 15-19     | 0.00114                      | 7108                                                              | 1185                                                          | 132                                                      |
|               | 20-24     | 0.00246                      | 5289                                                              | 962                                                           | 288                                                      |
|               | 25-29     | 0.00259                      | 4102                                                              | 1856                                                          | 684                                                      |
|               | 30-34     | 0.00271                      | 2883                                                              | 2745                                                          | 686                                                      |
|               | 35-39     | 0.00228                      | 1530                                                              | 4034                                                          | 1391                                                     |
|               | 40-44     | 0.00230                      | 1218                                                              | 2166                                                          | 2436                                                     |
|               | 45-49     | 0.00254                      | 1473                                                              | 2454                                                          | 1350                                                     |
| Department 91 | 0-4       | 0.01074                      | 608                                                               | 173                                                           | 54                                                       |
|               | 5-9       | 0.00087                      | 1001                                                              | 180                                                           | 164                                                      |
|               | 10-14     | 0.00080                      | 967                                                               | 343                                                           | 109                                                      |
|               | 15-19     | 0.00107                      | 1193                                                              | 212                                                           | 61                                                       |
|               | 20-24     | 0.00129                      | 672                                                               | 190                                                           | 59                                                       |
|               | 25-29     | 0.00428                      | 405                                                               | 186                                                           | 73                                                       |
|               | 30-34     | 0.00412                      | 324                                                               | 281                                                           | 171                                                      |
|               | 35-39     | 0.00183                      | 271                                                               | 289                                                           | 118                                                      |
|               | 40-44     | 0.00280                      | 206                                                               | 229                                                           | 145                                                      |
|               | 45-49     | 0.00286                      | 175                                                               | 201                                                           | 106                                                      |
| Department 91 | 50-54     | 0.00626                      | 91                                                                | 150                                                           | 112                                                      |
|               | 55-59     | 0.00954                      | 64                                                                | 143                                                           | 61                                                       |

†Values used in this table are for the urban population



1  
2  
3 <sup>1</sup> Initial value used in the stock of not-overweight population in 2005 for higher SES.

4 <sup>2</sup> Initial value used in the stock of overweight population in 2005 for higher SES.

5 <sup>3</sup> Initial value used in the stock of obese population in 2005 for higher SES.

## 6 7 **References**

- 8  
9  
10 1 Departamento Administrativo Nacional de Estadística. Series de población.  
11 <http://www.dane.gov.co/index.php/estadisticas-por-tema/demografia-y-poblacion/series-de-poblacion>  
12 (accessed 11 Jul 2017).  
13  
14  
15  
16  
17  
18  
19  
20  
21  
22  
23  
24  
25  
26  
27  
28  
29  
30  
31  
32  
33  
34  
35  
36  
37  
38  
39  
40  
41  
42  
43  
44  
45  
46  
47  
48  
49  
50  
51  
52  
53  
54  
55  
56  
57  
58  
59  
60

For peer review only

1  
2  
3  
4  
5  
6  
7  
8  
9  
10  
11  
12  
13  
14  
15  
16  
17  
18  
19  
20  
21  
22  
23  
24  
25  
26  
27  
28  
29  
30  
31  
32  
33  
34  
35  
36  
37  
38  
39  
40  
41  
42  
43  
44  
45  
46  
47  
48  
49  
50  
51  
52  
53  
54  
55  
56  
57  
58  
59  
60

**Supplementary Information 3**

**Supplement to: Using a system dynamics model to understand the obesity transition by socioeconomic status in Colombia at the country, regional, and department level.**

For peer review only

**Table of contents**

**Section 1. Model of nutritional stage dynamics** ..... 3

**Section 2. Estimation of transferences rates between nutritional stages by age group, sex, and SES group** 6

**Section 3. Map of Colombia by departments** ..... 8

**References** ..... 9

For peer review only

## Section 1. Model of nutritional stage dynamics

We developed a population-level system dynamics (SD) model which was based on a validated and calibrated model [1,2]. We used the following set of mathematical forms to study the obesity dynamics by socioeconomic status (SES) and sex at the country level. Specifically, equations (1-3) which correspond to the net rate of change of the population in each body mass index (BMI) category for the age group of zero to four years and equations (4-6) which correspond to the net rate of change of the population in each BMI category for the rest of the age groups:

$$\frac{dN_{0,j,k}(t)}{dt} = B_{N,j,k}(t) + \tau_{4,0,j,k}W_{0,j,k}(t) - \tau_{1,0,j,k}N_{0,j,k}(t) - E_{0,j,k}^N(t)(1 - S_{0,j}) - E_{0,j,k}^N(t)S_{0,j} \quad (1)$$

$$\frac{dW_{0,j,k}(t)}{dt} = B_{W,j,k}(t) + \tau_{1,0,j,k}N_{0,j,k}(t) + \tau_{3,0,j,k}O_{0,j,k}(t) - W_{0,j,k}(t)(\tau_{2,0,j,k} + \tau_{4,0,j,k}) - E_{0,j,k}^W(t)(1 - S_{0,j}) - E_{0,j,k}^W(t)S_{0,j} \quad (2)$$

$$\frac{dO_{0,j,k}(t)}{dt} = B_{O,j,k}(t) + \tau_{2,0,j,k}W_{0,j,k}(t) - \tau_{3,0,j,k}O_{0,j,k}(t) - E_{0,j,k}^O(t)(1 - S_{0,j}) - E_{0,j,k}^O(t)S_{0,j} \quad (3)$$

$$\frac{dN_{i,j,k}(t)}{dt} = E_{i-1,j,k}^N(t)S_{i-1,j} + \tau_{4,i,j,k}W_{i,j,k}(t) - \tau_{1,i,j,k}N_{i,j,k}(t) - E_{i,j,k}^N(t)(1 - S_{i,j}) - E_{i,j,k}^N(t)S_{i,j} \quad (4)$$

$$\frac{dW_{i,j,k}(t)}{dt} = E_{i-1,j,k}^W(t)S_{i-1,j} + \tau_{1,i,j,k}N_{i,j,k}(t) + \tau_{3,i,j,k}O_{i,j,k}(t) - W_{i,j,k}(t)(\tau_{2,i,j,k} + \tau_{4,i,j,k}) - E_{i,j,k}^W(t)(1 - S_{i,j}) - E_{i,j,k}^W(t)S_{i,j} \quad (5)$$

$$\frac{dO_{i,j,k}(t)}{dt} = E_{i-1,j,k}^O(t)S_{i-1,j} + \tau_{2,i,j,k}W_{i,j,k}(t) - \tau_{3,i,j,k}O_{i,j,k}(t) - E_{i,j,k}^O(t)(1 - S_{i,j}) - E_{i,j,k}^O(t)S_{i,j} \quad (6)$$

where  $i \in (0, \dots, 11)$  represents the age groups, in intervals of 5 years,  $j \in (1=\text{men}, 2=\text{women})$  represents the sex, and  $k \in (1=\text{lower}, 2=\text{middle}, 3=\text{higher SES})$  represents the SES group of the simulated population;  $N_{i,j,k}(t)$ ,  $W_{i,j,k}(t)$ , and  $O_{i,j,k}(t)$  are the populations of *not-overweight*, *overweight*, and *obese* individuals in the age group  $i$ , sex  $j$  and SES group  $k$ , respectively, at time  $t$  (unit: people);  $B_{N,j,k}(t)$ ,  $B_{W,j,k}(t)$ , and  $B_{O,j,k}(t)$  are the births for each BMI category, sex  $j$ , and SES group  $k$  at time  $t$  (unit: people per year); and  $E_{i,j,k}^N(t)$ ,  $E_{i,j,k}^W(t)$ , and  $E_{i,j,k}^O(t)$  are the exit rates, which correspond to the total number of individuals per year that leave each age group  $i$  for each sex  $j$ , SES group  $k$ , and BMI category at time  $t$  (unit: people per year).  $E_{i,j,k}^N(t)S_{i,j}$ ,  $E_{i,j,k}^W(t)S_{i,j}$ , and  $E_{i,j,k}^O(t)S_{i,j}$  are the individuals who mature into the next age group for each BMI category, age group  $i$ , sex  $j$ , and SES group  $k$ , respectively, at time  $t$  (unit: people per year), and  $E_{i,j,k}^N(t)(1-S_{i,j})$ ,  $E_{i,j,k}^W(t)(1-S_{i,j})$ , and  $E_{i,j,k}^O(t)(1-S_{i,j})$  correspond to the individuals who die for each BMI category, age group  $i$ , sex  $j$ , and SES group  $k$ , respectively, at time  $t$  (unit: people per year).  $S_{i,j}$  is the survival fraction per year for each age group  $i$  and sex  $j$  (unit: % per year). The parameters  $\tau_{1,i,j,k}$  and  $\tau_{2,i,j,k}$  are the transference rates (TRs) that correspond to the fraction of individuals per year from the *not overweight* and the *overweight* categories that become

1  
2  
3 *overweight* and *obese* for each age group  $i$ , sex  $j$ , and SES group  $k$ , respectively (unit: % per year). The  
4  
5 parameters  $\tau_{3,i,j,k}$  and  $\tau_{4,i,j,k}$  are the TRs of individuals from the *obese* to the *overweight* category and from the  
6  
7 *overweight* to the *not overweight* category, respectively, from each age group  $i$ , sex  $j$ , and SES group  $k$ ,  
8  
9 respectively (unit: % per year). We used a heuristic to estimate the TRs between BMI categories by age, sex,  
10  
11 and SES group using historical data from “Encuesta Nacional de la Situación Nutricional en Colombia”  
12  
13 (ENSIN) of 2005 and 2010. This heuristic identifies the TRs that minimize the difference between prevalence  
14  
15 rates by BMI category from 2010 ENSIN, and the model estimated prevalence rates by age, sex, and SES group.  
16  
17 It does this by comparing ENSIN data from at least two points in time. Figure 1 shows the global view of the  
18  
19 SD model structure at the country-level.

20  
21  
22 The number of births per year for each BMI category, sex, and SES group was determined using the  
23  
24 following equations:

$$25$$

$$26$$

$$27 \quad B_{N,j,k}(t) = \mu_j \theta_{N,j,k} \left( \frac{f(t)}{(Y_F - Y_I + 1)} \right) \sum_{i=Y_I}^{Y_F} (N_{i,2,k}(t) + W_{i,2,k}(t) + O_{i,2,k}(t)) \quad (7)$$

$$28$$

$$29 \quad B_{W,j,k}(t) = \mu_j \theta_{W,j,k} \left( \frac{f(t)}{(Y_F - Y_I + 1)} \right) \sum_{i=Y_I}^{Y_F} (N_{i,2,k}(t) + W_{i,2,k}(t) + O_{i,2,k}(t)) \quad (8)$$

$$30$$

$$31$$

$$32 \quad B_{O,j,k}(t) = \mu_j \theta_{O,j,k} \left( \frac{f(t)}{(Y_F - Y_I + 1)} \right) \sum_{i=Y_I}^{Y_F} (N_{i,2,k}(t) + W_{i,2,k}(t) + O_{i,2,k}(t)) \quad (9)$$

33  
34 where  $\mu$  is the total fraction of births by sex  $j$  (unit: % per year);  $\theta_{N,j,k}$ ,  $\theta_{W,j,k}$  and  $\theta_{O,j,k}$  are the fraction  
35  
36 of births (percent per year) for each BMI category, sex  $j$ , and SES group  $k$ , respectively, (also assumed to be  
37  
38 the prevalence rates of children aged 0 to 12 months, by BMI category);  $\sum_{i=Y_I}^{Y_F} (N_{i,2,k}(t) + W_{i,2,k}(t) + O_{i,2,k}(t))$  is  
39  
40 the size of the female population of childbearing age at time  $t$ ;  $f$  is the total number of children born from each  
41  
42 woman during the childbearing years (fertility rate) at time  $t$ ; and  $Y_I$  and  $Y_F$  are the first and last childbearing  
43  
44 years considered, which we assumed to be 15 to 49, respectively.  
45  
46  
47  
48  
49  
50  
51  
52  
53  
54  
55  
56  
57  
58  
59  
60

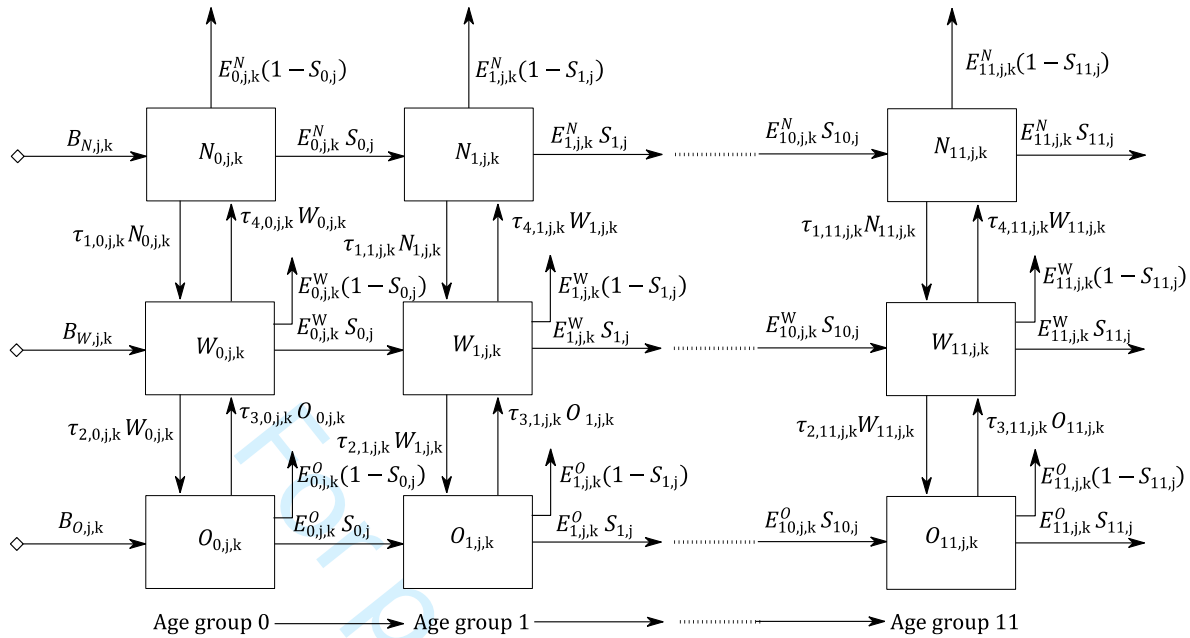

**Figure 1. Overview of the SD model structure at country level.**

The exit rates per year by BMI category, age group  $i$ , sex  $j$ , and SES group  $k$  were modelled using the following equations:

$$E_{0,j,k}^N(t) = \left( \frac{B_{N,j,k}(t) + \tau_{4,0,j,k} W_{0,j,k}(t) - \tau_{1,0,j,k} N_{0,j,k}(t)}{Y} \right) \quad (10)$$

$$E_{0,j,k}^W(t) = \left( \frac{B_{W,j,k}(t) + \tau_{1,0,j,k} N_{0,j,k}(t) + \tau_{3,0,j,k} O_{0,j,k}(t) - W_{0,j,k}(t)(\tau_{2,0,j,k} + \tau_{4,0,j,k})}{Y} \right) \quad (11)$$

$$E_{0,j,k}^O(t) = \left( \frac{B_{O,j,k}(t) + \tau_{2,0,j,k} W_{0,j,k}(t) - \tau_{3,0,j,k} O_{0,j,k}(t)}{Y} \right) \quad (12)$$

$$E_{i,j,k}^N(t) = \left( \frac{E_{i-1,j,k}^N(t) S_{i-1,j} + \tau_{4,i,j,k} W_{i,j,k}(t) - \tau_{1,i,j,k} N_{i,j,k}(t)}{Y} \right) \quad (13)$$

$$E_{i,j,k}^W(t) = \left( \frac{E_{i-1,j,k}^W(t) S_{i-1,j} + \tau_{1,i,j,k} N_{i,j,k}(t) + \tau_{3,i,j,k} O_{i,j,k}(t) - W_{i,j,k}(t)(\tau_{2,i,j,k} + \tau_{4,i,j,k})}{Y} \right) \quad (14)$$

$$E_{i,j,k}^O(t) = \left( \frac{E_{i-1,j,k}^O(t) S_{i-1,j} + \tau_{2,i,j,k} W_{i,j,k}(t) - \tau_{3,i,j,k} O_{i,j,k}(t)}{Y} \right) \quad (15)$$

where  $Y = 5$  years, corresponding to the average time individuals spend in a given age group before maturing into the next age group. Equations (10-12) correspond to the exit rates per year by BMI category for the age group zero to four years. Finally, the survival fraction for each age group  $i$  and sex  $j$  is determined by:

$$S_{i,j} = \exp(R_{i,j} Y) \quad (16)$$

where,  $R_{i,j}$  is the mortality rate (percent per year) for each age group  $i$  and sex  $j$ .

## Section 2. Estimation of transferences rates between nutritional stages by age group, sex, and SES group

We used a heuristic, which was based on previously published research [1,2], to estimate the TRs between nutritional stages by age, sex, and SES using historical data obtained from ENSIN of 2005 and 2010. For the purpose of the model, we assumed that the TRs are uniform within each five-year age group, but differed across age groups. The heuristic differs slightly depending on the level of analysis.

We adapted the heuristic to estimate the TRs using prevalence rates by nutritional stage grouped into age groups of 5 years. The heuristic did not use the prevalence rates by nutritional stage for each year between zero and 59 years to estimate the TRs by nutritional stage in 2010 for each age group, sex, and SES group. Instead, we adapted the heuristic to estimate the TRs by nutritional stage in 2010 using prevalence rates by nutritional stage grouped into age groups of five years. Using these estimates, the heuristic approximates the prevalence rates by nutritional stage in 2010 for each age group  $i$ , sex  $j$ , and SES group  $k$  independently using the following system of equations:

$$P'_{i+1,j,k} = A_{i,j,k} \cdot P_{j,k} \quad (1)$$

where

$$B_{i,j,k} = A_{i,j,k} \cdot (A_{i,j,k} \cdot (A_{i,j,k} \cdot (A_{i,j,k} \cdot A_{i,j,k})));$$

$$A_{i,j,k} = \begin{pmatrix} \alpha_{1,i,j,k} - \tau_{1,i,j,k} & \tau_{4,i,j,k} & 0 \\ \tau_{1,i,j,k} & \alpha_{2,i,j,k} - \tau_{2,i,j,k} - \tau_{4,i,j,k} & \tau_{3,i,j,k} \\ 0 & \tau_{2,i,j,k} & \alpha_{3,i,j,k} - \tau_{3,i,j,k} \end{pmatrix}; P'_{i+1,j,k} = \begin{pmatrix} p'_{N10,i+1,j,k} \\ p'_{W10,i+1,j,k} \\ p'_{O10,i+1,j,k} \end{pmatrix};$$

$$P_{i,j,k} = \begin{pmatrix} P_{N05,i,j,k} \\ P_{W05,i,j,k} \\ P_{O05,i,j,k} \end{pmatrix};$$

where  $i \in (0, \dots, 11)$  represents age groups of five years (0–4, 5–9, ..., 55–59);  $j \in (1, 2)$  represents sex (men and women, respectively);  $k \in (1, 2, 3)$  represents the SES groups (lower, middle, and higher SES., respectively);  $P_{N05,i,j,k}$ ,  $P_{W05,i,j,k}$ , and  $P_{O05,i,j,k}$  are the prevalence rates by nutritional stage in 2005 for age group  $i$ , sex  $j$ , and SES group  $k$ ;  $\alpha_{1,i,j,k}$ ,  $\alpha_{2,i,j,k}$ , and  $\alpha_{3,i,j,k}$  are the retention rates for individuals by nutritional stage, age group  $i$ , sex  $j$  and SES group  $k$ , corresponding to the fraction of individuals who remain in the same nutritional stage between 2005 and 2010;  $\tau_{1,i,j,k}$ ,  $\tau_{2,i,j,k}$ ,  $\tau_{3,i,j,k}$ , and  $\tau_{4,i,j,k}$  are the TRs that are used to run the SD model; and  $P'_{N10,i+1,j,k}$ ,  $P'_{W10,i+1,j,k}$ , and  $P'_{O10,i+1,j,k}$  are the estimated prevalence rates by nutritional stage in 2010 for age group  $i$ , sex  $j$ , and SES group  $k$  five years later. The matrix  $A_{i,j,k}$  represents the equations used to calculate the estimated prevalence rates by nutritional stage in the year  $t+1$  for age group  $i$ , sex  $j$ , and SES group  $k$ , where  $t$  is 2005. The heuristic estimates the TRs aggregated over five years.

Then, the heuristic calculates the TRs by nutritional stage for each age group, sex, and SES group by minimizing the difference between prevalence rates by nutritional stage reported in the 2010 ENSIN and the estimated 2010 prevalence rates informed by data from the 2005 ENSIN. Specifically, the TRs were estimated by solving the system of equations (1) for each age group  $i$ , sex  $j$ , and SES group  $k$  independently, and minimizing the following equation:

$$\begin{aligned} \text{Min } QD_{i,j,k} = & \left[ (P_{N10,i+1,j,k} - p'_{N10,i+1,j,k})^2 + (P_{W10,i+1,j,k} - p'_{W10,i+1,j,k})^2 \right. \\ & \left. + (P_{O10,i+1,j,k} - p'_{O10,i+1,j,k})^2 \right], \quad (2) \end{aligned}$$

with the restrictions

$$\alpha_{1,i,j,k} + \tau_{1,i,j,k} = 1$$

$$\alpha_{2,i,j,k} + \tau_{2,i,j,k} + \tau_{4,i,j,k} = 1$$

$$\alpha_{3,i,j,k} + \tau_{3,i,j,k} = 1 \quad (3)$$

$$0 \leq \alpha_{l,i,j,k} \leq 1, \quad (l = 1, 2, 3)$$

$$0 \leq \tau_{m,i,j,k} \leq 1, \quad (m = 1, 2, 3, 4)$$

where  $P_{N10,i+1,i,j,k}$ ,  $P_{W10,i+1,i,j,k}$ , and  $P_{O10,i+1,i,j,k}$  are the prevalence rates by nutritional stage and age  $i$  in 2010 for age group  $i+1$ , sex  $j$  and SES group  $k$ . At the department level, we did not include sex to estimate the TRs between nutritional stages; the sub index sex is therefore not included. We made these adaptations in the heuristic at the country, regional, and state levels because the ENSIN 2005 and 2010 data could not be used to generate good estimates of TRs by nutritional stage, age group, sex, and SES at the national and subnational level.



### Section 3. Map of Colombia by departments

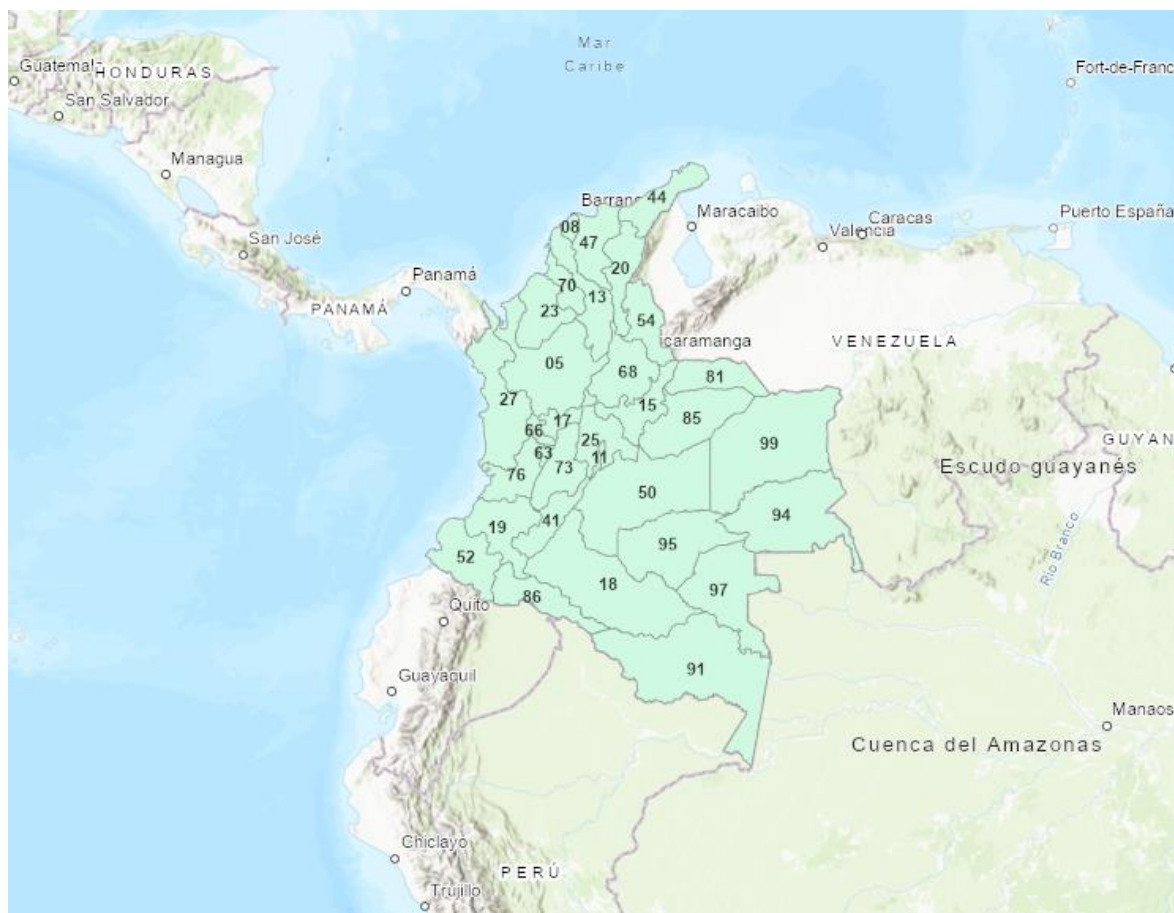

**Figure 2. Map of Colombia by departments [3].** **Atlántica región:** 08=Atlántico, 13= Bolívar, 20= Cesar, 23= Córdoba, 44= La Guajira, 47= Magdalena, 70= Sucre, 88= San Andrés; **Oriental región:** 15= Boyacá, 25= Cundinamarca, 50= Meta, 54= Norte de Santander, 68= Santander; **Central región:** 05= Antioquia, 17= Caldas, 18= Caquetá, 41= Huila, 63= Quindío, 66= Risaralda, 73= Tolima; **Pacífica región:** 19= Cauca, 27= Chocó, 52= Nariño, 76= Valle; **Bogotá = 11**; **Orinoquia y Amazonía región:** 81= Arauca, 85= Casanare, 86= Putumayo, 91= Amazonas, 94= Guainía, 95= Guaviare, 97= Vaupés, 99= Vichada. The map was created using ArcGIS online.

## References

- 1 Meisel JD, Sarmiento OL, Olaya C, *et al.* Towards a novel model for studying the nutritional stage dynamics of the Colombian population by age and socioeconomic status. *PLOS ONE* 2018;**13**:e0191929. doi:10.1371/journal.pone.0191929
- 2 Meisel JD, Sarmiento OL, Olaya C, *et al.* A system dynamics model of the nutritional stages of the Colombian population. *Kybernetics* 2016;**45**:554–70. doi:http://dx.doi.org/10.1108/K-01-2015-0010
- 3 DANE - Dirección de Geoestadística - GIT. Map of the Colombia by Departaments. 2019.<https://www.arcgis.com/home/item.html?id=3b869bedc1874c9eacefd03d5beea774> (accessed 9 Mar 2020).

# BMJ Open

## Using a system dynamics model to study the obesity transition by socioeconomic status in Colombia at the country, regional, and department level

|                                 |                                                                                                                                                                                                                                                                                                                                                                                                                                                                                                                                                                                                                                                                                                                                                   |
|---------------------------------|---------------------------------------------------------------------------------------------------------------------------------------------------------------------------------------------------------------------------------------------------------------------------------------------------------------------------------------------------------------------------------------------------------------------------------------------------------------------------------------------------------------------------------------------------------------------------------------------------------------------------------------------------------------------------------------------------------------------------------------------------|
| Journal:                        | <i>BMJ Open</i>                                                                                                                                                                                                                                                                                                                                                                                                                                                                                                                                                                                                                                                                                                                                   |
| Manuscript ID                   | bmjopen-2019-036534.R2                                                                                                                                                                                                                                                                                                                                                                                                                                                                                                                                                                                                                                                                                                                            |
| Article Type:                   | Original research                                                                                                                                                                                                                                                                                                                                                                                                                                                                                                                                                                                                                                                                                                                                 |
| Date Submitted by the Author:   | 17-Apr-2020                                                                                                                                                                                                                                                                                                                                                                                                                                                                                                                                                                                                                                                                                                                                       |
| Complete List of Authors:       | Meisel, Jose; Universidad de Ibague, Facultad de Ingeniería<br>Ramirez, Angie; Universidad de Ibague, Facultad de Ingeniería<br>Esguerra, Valentina; Universidad de los Andes, Department of Industrial Engineering, Social and Health Complexity Center<br>Montes, Felipe; Universidad de los Andes, Department of Industrial Engineering, Social and Health Complexity Center<br>Stankov, Ivana; Drexel University, Urban Health Collaborative, Dornsife School of Public Health<br>Sarmiento, Olga ; Universidad de los Andes, Department of Public Health, School of Medicine<br>Valdivia, Juan; Universidad de Chile, Departamento de Física, Facultad de Ciencias; Centro para el Desarrollo de la Nanociencia y la Nanotecnología, CEDENNA |
| <b>Primary Subject Heading</b>: | Public health                                                                                                                                                                                                                                                                                                                                                                                                                                                                                                                                                                                                                                                                                                                                     |
| Secondary Subject Heading:      | Public health                                                                                                                                                                                                                                                                                                                                                                                                                                                                                                                                                                                                                                                                                                                                     |
| Keywords:                       | EPIDEMIOLOGY, PUBLIC HEALTH, STATISTICS & RESEARCH METHODS, NUTRITION & DIETETICS                                                                                                                                                                                                                                                                                                                                                                                                                                                                                                                                                                                                                                                                 |
|                                 |                                                                                                                                                                                                                                                                                                                                                                                                                                                                                                                                                                                                                                                                                                                                                   |

SCHOLARONE™  
Manuscripts

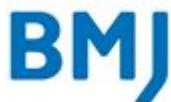

I, the Submitting Author has the right to grant and does grant on behalf of all authors of the Work (as defined in the below author licence), an exclusive licence and/or a non-exclusive licence for contributions from authors who are: i) UK Crown employees; ii) where BMJ has agreed a CC-BY licence shall apply, and/or iii) in accordance with the terms applicable for US Federal Government officers or employees acting as part of their official duties; on a worldwide, perpetual, irrevocable, royalty-free basis to BMJ Publishing Group Ltd ("BMJ") its licensees and where the relevant Journal is co-owned by BMJ to the co-owners of the Journal, to publish the Work in this journal and any other BMJ products and to exploit all rights, as set out in our [licence](#).

The Submitting Author accepts and understands that any supply made under these terms is made by BMJ to the Submitting Author unless you are acting as an employee on behalf of your employer or a postgraduate student of an affiliated institution which is paying any applicable article publishing charge ("APC") for Open Access articles. Where the Submitting Author wishes to make the Work available on an Open Access basis (and intends to pay the relevant APC), the terms of reuse of such Open Access shall be governed by a Creative Commons licence – details of these licences and which [Creative Commons](#) licence will apply to this Work are set out in our licence referred to above.

Other than as permitted in any relevant BMJ Author's Self Archiving Policies, I confirm this Work has not been accepted for publication elsewhere, is not being considered for publication elsewhere and does not duplicate material already published. I confirm all authors consent to publication of this Work and authorise the granting of this licence.

# Using a system dynamics model to study the obesity transition by socioeconomic status in Colombia at the country, regional, and department level

Jose D. Meisel<sup>1,2\*</sup>, Angie M. Ramirez<sup>3</sup>, Valentina Esguerra<sup>4</sup>, Felipe Montes<sup>5</sup>, Ivana Stankov<sup>6</sup>, Olga L. Sarmiento<sup>7</sup>, Juan A. Valdivia<sup>8,9</sup>

<sup>1</sup> Facultad de Ingeniería, Universidad de Ibagué, Carrera 22 Calle 67, 730001, Ibagué, Colombia. Ph: +57(8) 2760010. Fax: +57(8) 2760010. [jd.meisel28@uniandes.edu.co](mailto:jd.meisel28@uniandes.edu.co)

<sup>2</sup> Social and Health Complexity Center, Bogotá, Colombia

<sup>3</sup> Facultad de Ingeniería, Universidad de Ibagué, Carrera 22 Calle 67, 730001, Ibagué, Colombia. Ph: +57(8) 2760010. Fax: +57(8) 2760010. [angie.ramirez@unibague.edu.co](mailto:angie.ramirez@unibague.edu.co)

<sup>4</sup> Department of Industrial Engineering, Universidad de los Andes, Social and Health Complexity Center, Carrera 1 Este No. 19A-40, Bogotá, Colombia. [v.esguerra@uniandes.edu.co](mailto:v.esguerra@uniandes.edu.co)

<sup>5</sup> Department of Industrial Engineering, Universidad de los Andes, Social and Health Complexity Center, Bogotá, Colombia. Carrera 1 Este No. 19A-40, Bogotá, Colombia. [felmont@uniandes.edu.co](mailto:felmont@uniandes.edu.co)

<sup>6</sup> Urban Health Collaborative, Dornsife School of Public Health, Drexel University, 3600 Market St, 7th floor, Philadelphia, PA 19104, USA. [is379@drexel.edu](mailto:is379@drexel.edu)

<sup>7</sup> Department of Public Health, School of Medicine, Universidad de los Andes, Carrera 1 Este No. 19A-40, Bogotá, Colombia. [osarmien@uniandes.edu.co](mailto:osarmien@uniandes.edu.co)

<sup>8</sup> Departamento de Física, Facultad de Ciencias, Universidad de Chile, Las Palmeras 3425, Ñuñoa Santiago, Chile. [alejo@macul.ciencias.uchile.cl](mailto:alejo@macul.ciencias.uchile.cl)

<sup>9</sup> Centro para el Desarrollo de la Nanociencia y la Nanotecnología, CEDENNA, Santiago, Chile.

\* Corresponding author: Jose D. Meisel, Carrera 22 Calle 67, Ibagué, Colombia. Ph: +57(8) 2760010 ext. 4006. Fax: +57(8) 2760010. [jd.meisel28@uniandes.edu.co](mailto:jd.meisel28@uniandes.edu.co)

## Key words

Epidemiology, Public Health, Obesity Transition, System Dynamics Model, Complex System, System Science

## ABSTRACT

1 **Objective:** We study the obesity transition by socioeconomic status (SES), gender, and age within  
2 the Colombian urban population at the country, regional, and department level.

3 **Design:** The study is informed by cross-sectional data from the 2005 and 2010 ENSIN survey. We  
4 used these data to develop a system dynamics model that simulates the dynamics of obesity by body  
5 mass index (BMI) categories, gender, and SES at the country, regional, and department level from  
6 2005 to 2030.

7 **Participants:** The sample size of the 2005 ENSIN comprised 8,515 children younger than five years,  
8 32,009 children and adolescents aged 5–17 years, and 48,056 adults aged 18–64 years. In 2010 the  
9 corresponding numbers were 11,368, 32,524, and 64,425, respectively.

10 **Primary and secondary outcome measure:** The obesity prevalence ratio and prevalence rates for  
11 each BMI category.

12 **Results:** The results show, at the country-level, transitions from overweight to obesity were projected  
13 to increase sharply among lower SES adults, particularly among women, suggesting that these groups  
14 will undergo an obesity transition by 2030. The model projections also indicate that the regions of  
15 Colombia are in different stages of the obesity transition. In the case of women, five out of the six  
16 regions were expected to undergo an obesity transition by SES over time. For men, only one region  
17 was expected to undergo an obesity transition. However, at the department-level, trends in the burden  
18 of obesity varied.

19 **Conclusions:** We evidence that the Colombian population could be experiencing an obesity transition  
20 where the increase in the GDP could be related to shifts in the burden of obesity from higher to lower  
21 SES, especially in women. These patterns support the need for policy planning that considers SES  
22 and gender, at the national and sub-national level, as important determinants of overweight and

23 obesity among adults in Colombia.

24 **Article word count:** 4511

25 **Abstract word count:** 298

26 **Reference word count:** 1540

27 **Number of References:** 57

28 **Figures:** 5

29 **Tables:** 1

## 30 **ARTICLE SUMMARY**

### 31 **Strengths and limitations**

- 32 • To our knowledge, this is the first Systems Dynamics (SD) model to explore the obesity  
33 transition by age, gender, and socioeconomic status (SES) at the national and sub-national  
34 level.
- 35 • The SD model has the capacity to incorporate a real-world ageing population structure from  
36 an upper middle-income country to dynamically explore the relationship between gross  
37 domestic product (GDP), and overweight and obesity prevalence, by gender and SES.
- 38 • Our study focuses only on GDP per capita as the main indicator of economic development at  
39 the country, region, and department-levels. This is the only indicator we had with available  
40 data across all time points and at both the national and subnational level.
- 41 • Transference rates (TRs) between BMI categories were estimated using two data points and  
42 we assumed no variation in mortality rates across BMI categories because these data were  
43 not available.
- 44 • Our model assumes that the estimated TRs between BMI categories do not change over  
45 time.

## 46 INTRODUCTION

47 Obesity has become a global epidemic with at least 2.8 million deaths each year attributable  
48 to overweight and obesity [1]. Obesity and overweight are associated with a range of non-  
49 communicable diseases (NCDs) including cardiovascular diseases, cancer, diabetes, and chronic  
50 respiratory diseases. These NCDs are the leading global cause of death (70% of deaths worldwide)  
51 [2], especially in low- and middle-income countries (LMIC) [3].

52 Studies of socioeconomic status (SES) and obesity have shown that LMIC are facing an  
53 obesity transition, which sees the burden of obesity shift toward the lowest SES group, particularly  
54 in women, as the economic development level of a country increases [4–7]. Growing evidence  
55 suggests that several countries in Latin America and the Caribbean are experiencing an important and  
56 rapid obesity transition [8,9](e.g. Chile [10], Brazil [11,12], Colombia [13–15], Mexico [16],  
57 Argentina [17]). These findings have been echoed most recently by Jaacks et al. [18] who suggest  
58 that some Latin-American countries (e.g., Mexico, Colombia, Brazil) have experienced an obesity  
59 transition. In 1975, these countries were in a stage characterized by a higher prevalence of obesity in  
60 women compared with men. In 2016, these countries had entered a new stage that is characterized,  
61 mainly, by a reduction in the difference in obesity prevalence, by SES, among women.

62 This paper focuses on Colombia because it has experienced significant increases in the Gross  
63 domestic product (GDP) over the past decade (GDP increased from USD 145.181 billion in 2005 to  
64 USD 293.482 billion [19] in 2015). Additionally, Colombia has high social inequality that allows for  
65 the categorization of the population into differentiated socioeconomic groups. This socioeconomic  
66 differentiation makes it especially relevant for the study of obesity transition patterns. According to  
67 the World Bank's GINI index, Colombia is ranked the fourth most unequal country in Latin  
68 America[20]. Moreover, there is evidence that Colombia may be undergoing an obesity transition  
69 both at the country- and regional-level. According to the 2005 and 2010 "Encuesta Nacional de la



1  
2  
3 70 Situación Nutricional en Colombia” (ENSIN) survey [21,22], at the country-level there was a higher  
4  
5 71 increase in the prevalence of obesity in the lowest wealth index (WI) quintile compared to the highest  
6  
7 72 WI quintile for children, adolescents, and adults. These patterns, however, differ importantly by  
8  
9 73 region- and department-level, but have not been evaluated. Identifying obesity transition patterns at  
10  
11 74 the national- and sub-national levels is key to developing more targeted and effective interventions.  
12  
13

14  
15 75 Furthermore, obesity can be tackled as a complex adaptive system [23] due to the global  
16  
17 76 scope, heterogeneous patterns, wide-ranging causes and impacts, and the absence of a single solution.  
18  
19 77 Given the dynamic and complex nature of obesity, calls have been made for the use of complex  
20  
21 78 systems methods to better understand and address the public health challenges posed by the obesity  
22  
23 79 epidemic [24]. To date however, most studies focused on understanding the relationship between  
24  
25 80 economic development and obesity across the socioeconomic spectrum have applied statistical  
26  
27 81 models (regression-based approaches) [5–7]. Studies employing complex systems approaches to  
28  
29 82 understand obesity and its associated factors have used methods such as, system dynamics (SD)  
30  
31 83 [15,25–29], network analysis (NA) [30–34] and agent based modelling (ABM) [35–38]. The body of  
32  
33 84 literature applying complex system approaches to investigate the dynamics of obesity by SES and  
34  
35 85 gender on the other hand, remains limited. The only such study that has been conducted in a Latin  
36  
37 86 America country has not accounted for diversity at the sub-national-level [18,39].  
38  
39  
40

41 87 At the population-level, various SD models have been proposed to study the dynamics of  
42  
43 88 obesity, for example: the nutritional stage dynamics between body mass index (BMI) categories by  
44  
45 89 age and SES [15], the energy imbalance gap (EIG) by gender and racial subpopulations among US  
46  
47 90 adults [26], weight gain and obesity in women of reproductive age and its impact on family building  
48  
49 91 [25], the distributions of weight and SES and the transitions between these states over time in US  
50  
51 92 [29], and the effect of changes in the eating behavior of British children (aged 2 to 15 years) on weight  
52  
53 93 and obesity [27]. These studies were developed to monitor the impact of health interventions and to  
54  
55 94 evaluate different policy scenarios seeking to curb obesity prevalence.  
56  
57  
58  
59  
60

1  
2  
3 95 Although different SD models have been developed to study obesity dynamics at the  
4  
5 96 population-level, to date there has been no attempt to understand this complex system at the national-  
6  
7 97 and sub-national-level. Characterizing obesity dynamics at these levels could afford important  
8  
9 98 insights relevant to the development of targeted obesity prevention initiatives by age, gender, and  
10  
11 99 SES. This study seeks to bridge this gap by applying SD modelling to investigate obesity transitions  
12  
13  
14 100 by SES, gender, and age, along with their relationship to GDP, within the Colombian urban  
15  
16 101 population at the country-, regional-, and department-level over time. Specifically, we seek to identify  
17  
18 102 in which regions and departments of Colombia the burden of obesity have shifted towards the lower  
19  
20 103 SES populations, and how these shifts relate to regional and department-level GDP.  
21  
22

## 23 104 **Methods**

### 26 105 **Model overview**

29 106 To analyse the obesity dynamics at the national and sub-national levels, we developed a  
30  
31 107 population-level SD model and used a heuristic to estimate the transition rates (TRs) between BMI  
32  
33 108 categories by age, gender, and SES using data obtained, mainly from the 2005 and 2010 ENSIN for  
34  
35 109 individuals aged 0 to 64 years, which were based on a validated and calibrated model [15,40].  
36  
37  
38 110 Specifically, tests assessing the suitability of the SD model showed that the model was robust and  
39  
40 111 that the simulated behaviour was consistent with the expected results for the estimated prevalence  
41  
42 112 rates for each BMI category and age [15]. We estimated the TRs between BMI categories by age,  
43  
44 113 gender, and SES and applied the SD model to simulate and investigate the obesity dynamics by SES  
45  
46 114 within the Colombian urban population from 2005 to 2030. We only simulated the urban population  
47  
48 115 because the highest SES group in rural areas is poorly represented (i.e., less than 0.05% of the  
49  
50 116 population) [41].  
51  
52  
53

### 54 117 **Data**

118 The study is based on cross-sectional data obtained from the 2005 and 2010 ENSIN [21,22].  
 119 The ENSIN used a multistage, stratified, population-based cluster sampling design that included both  
 120 household and individual components. The questionnaire was administered in the home by female  
 121 interviewers equipped with computer-assisted personal interview technology. The sample for 2005  
 122 comprised 8,515 children younger than five years, 32,009 children and adolescents aged 5–17 years,  
 123 and 48,056 adults aged 18–64 years. In 2010 the corresponding numbers for the sample were 11,368,  
 124 32,524, and 64,425, respectively. All the protocols were reviewed and approved by the Profamilia  
 125 Institutional Review Board on Research Involving Human Subjects. All the data used in the model  
 126 were obtained from public sources and are fully available in Supplementary information 1-3. Table 1  
 127 describes the data sources used in the model.

128 **Table 1. Data sources used in the model<sup>†</sup>**

| <i>Item</i>                                                                                            | <i>Data Source</i>                                                                                                                                                                                                                                              |
|--------------------------------------------------------------------------------------------------------|-----------------------------------------------------------------------------------------------------------------------------------------------------------------------------------------------------------------------------------------------------------------|
| <b><i>Prevalence rates by BMI category, age, and WI at country, regional, and department level</i></b> |                                                                                                                                                                                                                                                                 |
| BMI for age and gender z-score for children and adolescents aged 0 to 17 years by WI                   | National Nutrition Survey (ENSIN), 2005 [21]                                                                                                                                                                                                                    |
| BMI category prevalence by age, gender, and WI for adults                                              | National Nutrition Survey (ENSIN), 2010 [22]                                                                                                                                                                                                                    |
| <b><i>Population composition at country, regional, and department level</i></b>                        |                                                                                                                                                                                                                                                                 |
| Population size by age, gender, and WI                                                                 | Colombian National Department of Statistics (DANE). Estimations and population projections for 1985–2020 [42]                                                                                                                                                   |
| Mortality rates by age group and gender                                                                | DANE. Vital Statistics (2005) [43]                                                                                                                                                                                                                              |
| Fertility rate                                                                                         | World Data Bank. World Development Indicators (1960–2014) [44]<br><br>Projections for 2015–2030. Forecast series using the Holt-Winters no seasonal method in EViews 10 (Quantitative Micro Software, LLC)<br><br>DANE. Population series-Fertility estimations |

|                                                                                                                                                                                                                                                                                                                                                                                           |                                                                                                                                                                                              |
|-------------------------------------------------------------------------------------------------------------------------------------------------------------------------------------------------------------------------------------------------------------------------------------------------------------------------------------------------------------------------------------------|----------------------------------------------------------------------------------------------------------------------------------------------------------------------------------------------|
|                                                                                                                                                                                                                                                                                                                                                                                           | (1985-2005) y Projections (2005-2020) for Colombia departments[42].                                                                                                                          |
| Fraction of births by BMI category and gender                                                                                                                                                                                                                                                                                                                                             | National Nutrition Survey (ENSIN), 2005 [21]                                                                                                                                                 |
| <b><i>Classification of individuals by BMI category</i></b>                                                                                                                                                                                                                                                                                                                               |                                                                                                                                                                                              |
| Height-for-age z-score and BMI for age and gender z-score cutoff points for children and adolescents aged 0 to 17 years:<br><br>Not overweight: BMI for age and gender z-score $\leq 1$ standard deviation.<br>Overweight: BMI for age and gender z-score $> 1$ standard deviation and $\leq 2$ standard deviations.<br>Obese: BMI for age and gender z-scores $> 2$ standard deviations. | WHO child growth standards [45]<br><br>WHO child growth references [46]                                                                                                                      |
| BMI category cut-points for adults aged 18 to 64 years:<br><br>Not overweight: BMI $< 25$ kg/m <sup>2</sup><br>Overweight: BMI $\geq 25$ and $< 30$ kg/m <sup>2</sup><br>Obese: BMI $\geq 30$ kg/m <sup>2</sup>                                                                                                                                                                           | WHO cut-off points [47]                                                                                                                                                                      |
| <b><i>SES indicator</i></b>                                                                                                                                                                                                                                                                                                                                                               |                                                                                                                                                                                              |
| Wealth index quintile                                                                                                                                                                                                                                                                                                                                                                     | National Nutrition Survey (ENSIN), 2005 [21]<br><br>National Nutrition Survey (ENSIN), 2010 [22]                                                                                             |
| <b><i>Economic development level indicator</i></b>                                                                                                                                                                                                                                                                                                                                        |                                                                                                                                                                                              |
| GDP per capita at regional and department level                                                                                                                                                                                                                                                                                                                                           | DANE. Gross domestic product per capita [48]<br><br>Projections for 2017–2030. Forecast series using the double exponential smoothing method in EViews 10 (Quantitative Micro Software, LLC) |

129 †DHS = Demographic and Health Surveys; DANE = Colombian National Department of Statistics  
 130 (for the Spanish acronym); WHO = World Health Organization; BMI = body mass index; WI = wealth  
 131 index.

## 132 Patient and Public Involvement statement

1  
2  
3 133 Due to the very technical methods required to do the data analysis, patients or the public were  
4  
5 134 not involved in the design or dissemination plans of our research.  
6  
7

## 8 135 **Model to assess the obesity dynamics**

9  
10  
11  
12 136 We used a population-level SD model to assess the obesity dynamics by SES at the national-  
13  
14 137 and sub-national levels. The model is characterised by ageing chains, which are robust structures  
15  
16 138 commonly used in SD models to understand the evolution of ageing in a population. They are  
17  
18 139 especially important when population data are sparse. Our population-level SD model includes ageing  
19  
20 140 chains for three BMI categories (*not overweight*, *overweight*, and *obese*); in which the population  
21  
22 141 aged 0-59 years was divided into age groups of 5 years. People in the 60 to 64 age group are not  
23  
24 142 represented in the SD model. This is because 2010 prevalence rates by BMI categories for the age  
25  
26 143 group 65 to 69, which are required for a reliable estimate of the TRs for this age group, are  
27  
28 144 unavailable. Individuals were classified into the three BMI categories based on WHO standards and  
29  
30 145 references (Table 1) [45–47]. Additionally, in the SD model structure we included births and deaths  
31  
32 146 (the mortality rates differed among the age groups and gender) for each cohort [40]. Given our interest  
33  
34 147 in investigating the obesity dynamics by SES, we assumed the same mortality rate for each BMI  
35  
36 148 category in each age group. The net migration rate (NMR) is another variable that could be included  
37  
38 149 in an ageing chain structure. At the country-level, NMR ranges from -0.23% to -2.65% for the  
39  
40 150 different age groups of 5 years. At the department-level, the NMR ranges from -0,18% to -1,47% for  
41  
42 151 negative values and from 0,18% to 1,38% for positive values among the different age groups and  
43  
44 152 departments. Nevertheless, we did not include net migration as a variable in the SD model because  
45  
46 153 to date, there are no data for Colombia that relate to mortality rates or net migration patterns by BMI  
47  
48 154 category [43,49].  
49  
50  
51  
52

53 155 To stratify the population by SES group we used the World Bank's Wealth Index (WI) [50].  
54  
55 156 It is a validated index that allows categorization of the population into socio-economic groups and  
56  
57  
58  
59  
60

1  
2  
3 157 captures quality of life markers [51]. We grouped the WI quintiles into three socioeconomic groups:  
4  
5 158 the lowest and second quintiles (lowest SES group), the middle quintile (middle SES group), and the  
6  
7 159 fourth and highest quintiles (highest SES group).  
8  
9

10  
11 160 To examine the obesity transition by SES over time, we compared the lowest SES group with  
12  
13 161 the highest SES group using the simulated obesity prevalence ratio (PR), which is a measure of the  
14  
15 162 ratio of the probability, for each gender  $j$ , of being obese in the lowest SES group to the probability  
16  
17 163 of being obese in the highest SES group for individuals aged 20 to 59 years, according to the following  
18  
19 164 equation:  
20  
21

$$165 \quad PR_j(t) = \frac{\sum_{i=4}^{11} O_{ij,1}(t)}{\sum_{i=4}^{11} (N_{ij,1}(t) + W_{ij,1}(t) + O_{ij,1}(t))} \bigg/ \frac{\sum_{i=4}^{11} O_{ij,3}(t)}{\sum_{i=4}^{11} (N_{ij,3}(t) + W_{ij,3}(t) + O_{ij,3}(t))}$$

22  
23  
24  
25  
26  
27  
28  
29  
30  
31 166 Where  $t$  represents the time in years of the simulation;  $N_{ij,1}$ ,  $W_{ij,1}$ ,  $O_{ij,1}$  represent *not*  
32  
33 167 *overweight*, *overweight*, and *obese* individuals with the lowest SES, respectively, in age group  $i$  and  
34  
35 168 gender  $j$ , and  $N_{ij,3}$ ,  $W_{ij,3}$ ,  $O_{ij,3}$  represent *not overweight*, *overweight*, and *obese* individuals of higher  
36  
37 169 SES, respectively, in age group  $i$  and gender  $j$ . A PR value greater than one indicates that the obesity  
38  
39 170 prevalence of the lowest SES group is greater than the obesity prevalence of the highest SES group.  
40  
41 171 We assumed that individuals did not change SES group membership because there are no available  
42  
43 172 data from which TRs between SES groups can be derived for individuals in Colombia at the country,  
44  
45 173 regional, or department level. Additionally, we used the GDP per capita to study the relation between  
46  
47 174 the level of economic development, and obesity by SES over time. To analyse the relation between  
48  
49 175 obesity PRs by SES and the economic development level over time, we forecasted the GDP per capita  
50  
51 176 from 2017 to 2030 by applying a double exponential smoothing method to GDP data from the  
52  
53 177 DANE[48]. The full description of the SD model is available in the Supplementary information 3 pp.  
54  
55  
56  
57  
58  
59  
60

1  
2  
3 178 3-5.  
4  
5

6 179 We used a similar SD model to simulate the obesity dynamics at the regional and department  
7  
8 180 level. At the regional level, we studied the obesity dynamics by SES and gender in six regions:  
9  
10 181 Atlántica, Bogotá, Central, Oriental, Orinoquía y Amazonia, and Pacífico. At the department level,  
11  
12 182 we only studied the obesity dynamics by SES in 29 of 32 departments of Colombia (a map of  
13  
14 183 Colombia by regions and departments is available in the Supplementary information 3 pp. 8). The  
15  
16 184 model could not be used to simulate Choco, Vaupes, and Vichada departments because reliable TR  
17  
18 185 estimates could not be generated for these departments due to limitations in the ENSIN data.  
19  
20 186 Similarly, data sparsity for the Putumayo, Amazonas, Guainía, and Guaviare departments, made it  
21  
22 187 impossible to estimate the TRs for the highest SES group. Therefore, for these departments, we  
23  
24 188 assessed the obesity dynamics by SES, by comparing the lowest SES group with the middle SES  
25  
26 189 group using the PR of obesity. Additionally, the forecasts of the GDP per capita for the Arauca,  
27  
28 190 Casanare, Meta, and Putumayo departments were not used because these departments had an unstable  
29  
30 191 GDP per capita growth over time and the forecasts therefore did not have a good fit. Finally, at the  
31  
32 192 department level, we did not include gender to simulate the obesity dynamics and to estimate the TRs  
33  
34 193 between BMI categories due to limitations in the ENSIN data when we divided the population into  
35  
36 194 BMI categories, gender, and SES. The data processing was conducted using SAS 9.3 (SAS Institute  
37  
38 195 Inc.) and Mathematica 11 (Wolfram Research, Inc.), while all simulations were run on iThink 9.0.2  
39  
40 196 (ISEE Systems, Inc.).  
41  
42  
43  
44

## 45 197 **RESULTS**

### 46 198 **Obesity dynamics at country level by gender, age, and SES**

47  
48  
49 199 The results of the heuristic show that estimated TRs towards overweight ( $\tau_1$ ) and obese ( $\tau_2$ )  
50  
51 200 were larger among individuals in the lower SES group, particularly women (mean  $\tau_1 = 0.0195$  and  
52  
53 201 mean  $\tau_2 = 0.0059$ , for men; and mean  $\tau_1 = 0.0245$  and mean  $\tau_2 = 0.0125$ , for women), than among  
54  
55  
56  
57  
58  
59  
60

1  
2  
3 202 those in the middle (mean  $\tau_1 = 0.0159$  and mean  $\tau_2 = 0.0037$ , for men; and mean  $\tau_1 = 0.0164$  and  
4  
5 203 mean  $\tau_2 = 0.0095$ , for women), or higher SES groups (mean  $\tau_1 = 0.0143$  and mean  $\tau_2 = 0.0061$ , for  
6  
7 204 men; and mean  $\tau_1 = 0.0169$  and mean  $\tau_2 = 0.0041$ , for women) (Figures 1A, 1B, 1C, and 1D). For  
8  
9 205 boys aged 0 to 4 years, the TRs to overweight ( $\tau_1$ ) and obese ( $\tau_2$ ) were larger in the highest SES than  
10  
11 206 the other SES groups (Figures 1A and 1C). For boys aged 10 to 14, the TR from obese to overweight  
12  
13 207 ( $\tau_3$ ) and from overweight to not overweight ( $\tau_4$ ) were larger in the middle and higher SES groups  
14  
15 208 than in the lower SES group according to heuristic estimates. For girls aged 5 to 9, on the other hand,  
16  
17 209 the TR from obese to overweight ( $\tau_3$ ) were larger in the middle and higher SES groups than in the  
18  
19 210 lower SES group. For girls aged 0 to 4, the TR from overweight to not overweight ( $\tau_4$ ) were larger  
20  
21 211 in the lower SES group than the other SES groups (Figures 1E, 1F, 1G, and 1H).

22  
23  
24  
25 -----  
26  
27 213 Insert Figure 1 about here  
28  
29 214 -----  
30  
31

32 215 Simulation results show that children and adolescents aged 0 to 14 (both boys and girls) will  
33  
34 216 show no major changes in their BMI category distribution over time, across all SES populations.  
35  
36 217 However, the burden of obesity is shifting towards the lower SES populations, especially among  
37  
38 218 adults (Figure 2). Between 2005 and 2030, men aged 14 to 59 years are moving towards overweight  
39  
40 219 and obesity categories (Figures 2A, 2B, 2C). Specifically, the prevalence of overweight among men  
41  
42 220 aged 20 to 59 years in the lowest, middle, and highest SES groups increased from 28.5% to 49%,  
43  
44 221 34.8% to 49.1%, and 40.8% to 50.6%, respectively (Figures 2D, 2E, and 2F). Among obese men aged  
45  
46 222 20 to 59 years, the differences between SES groups were also striking with a lower, middle, and  
47  
48 223 higher SES increased from 7.9% to 13.6%, 11.9% to 14%, and 14.7% to 16.1%, respectively (Figures  
49  
50 224 2G, 2H, and 2I). In the case of women aged 14 to 59 years, they are also moving towards overweight  
51  
52 225 and obesity categories (Figures 2J, 2K, 2L). Specifically, the prevalence of overweight among women  
53  
54 226 aged 20 to 59 years in the lowest, middle, and highest SES groups increased from 32.6% to 46.8%,  
55  
56  
57  
58  
59



1  
2  
3 227 34.2% to 43.8%, and 33.8% to 50.2%, respectively (Figures 2M, 2N, and 2Ñ). Among obese women  
4  
5 228 aged 20 to 59 years, the differences between SES groups were even more prominent than in men with  
6  
7 229 a lower, middle, and higher SES increased from 13.8% to 29%, 19.1% to 26.6%, and 18.3% to 19.8%,  
8  
9 230 respectively (Figures 2O, 2P, and 2Q).

11  
12 231 -----  
13  
14 232 Insert Figure 2 about here

15  
16 233 -----  
17  
18  
19  
20 234 The simulated obesity prevalence ratios among urban men and women aged 20 to 59 years  
21  
22 235 (Figure 3) confirm that the burden of obesity among adults, especially women, tends to shift towards  
23  
24 236 those with lower SES. In fact, we confirmed, for both men and women, that obesity in the lower SES  
25  
26 237 population is increasing faster than obesity in higher SES populations. Despite these trends however,  
27  
28 238 for men, the burden of obesity is projected to remain greatest among individuals with higher SES, at  
29  
30 239 least up to and potentially beyond 2030.

31  
32  
33 240 -----  
34  
35 241 Insert Figure 3 about here

36  
37 242 -----  
38  
39  
40

## 41 243 **Obesity dynamics at region level by gender, age, and SES**

42  
43 244 The model projections further indicate that the regions of Colombia are in different stages of  
44  
45 245 the obesity transition (Figure 4). For men, the only region that was projected to experience an obesity  
46  
47 246 transition, was Orinoquia y Amazonia. However, the GDP per capita within this region increased  
48  
49 247 only from 2005 to 2013 (percentage increase of 124.86%), followed by a small decrease in the period  
50  
51 248 between 2014 and 2016. In the Atlántica, Pacífica, and Central regions, the PR of obesity increased  
52  
53 249 more rapidly in the lowest SES group than the highest SES group as the GDP per capita increases.  
54  
55 250 Nevertheless, according to our model, these regions were unlikely to experience an obesity transition

1  
2  
3 251 by 2030. Bogotá and Oriental regions were also not expected to undergo an obesity transition. In fact,  
4  
5 252 the model's projections indicate that these two regions would likely follow an inverted trajectory  
6  
7 253 compared to other regions in Colombia (Figure 4A). In the case of women, in five out of the six  
8  
9 254 regions (i.e., Atlántica, Oriental, Central, Pacífico and Orinoquia y Amazonía) the burden of obesity  
10  
11 255 was projected to shift towards populations with lower SES, as the GDP per capita increased. Our  
12  
13 256 model projections also suggest that these regions were likely to experience an obesity transition  
14  
15 257 (Figure 4B). While the burden of obesity was also observed to shift towards populations with lower  
16  
17 258 SES in Bogotá, women in this region were not projected to undergo an obesity transition, unlike those  
18  
19 259 in the other regions (Figure 4B).

260

-----

261

Insert Figure 4 about here

262

-----

## 263 **Obesity dynamics at department-level by SES**

264 Akin to the model projections at the regional-level, we observed that the departments of  
265 Colombia are also at different stages of the obesity transition (Figure 5). In nine departments, we  
266 observed that the obesity PR increased more rapidly in the lowest SES group than in the highest SES  
267 group as the department's GDP per capita increased: Amazonas, Guanía, Cauca, Valle del Cauca,  
268 Boyacá, Antioquia, Tolima, Caldas, and San Andres. In the departments of Santander, Atlántico,  
269 Bolívar, Norte de Santander, Cesar, La Guajira, Magdalena and Sucre, though these departments were  
270 unlikely to experience an obesity transition according to model estimates. Similarly, in the  
271 departments of Arauca, Casanare, and Putumayo, the PR of obesity increased more rapidly in the  
272 lower SES group than in highest SES group (for the period with useable GDP estimates), though no  
273 obesity transitions were apparent during the available years. On the other hand, in departments of  
274 Cundinamarca, Córdoba, Huila, Nariño, Quindío, Risaralda, Caquetá, and Guaviare, the obesity PR  
275 increased more rapidly in the highest SES group than in the lowest SES group, despite increases in

1  
2  
3 276 the GDP per capita (Figure 5). Similarly, in the Meta department, the obesity PR increased more  
4  
5 277 rapidly in the higher SES group than in the lower SES group (for the period with useable GDP  
6  
7 278 estimates).

9  
10 279 -----  
11  
12 280 Insert Figure 5 about here

13  
14 281 -----  
15  
16

## 17 282 **Discussion**

18  
19  
20  
21 283 The findings of this paper indicate that there exist substantial variations in the projected  
22  
23 284 burden of obesity by gender, age, and across the socioeconomic spectrum within and across the  
24  
25 285 regions and departments of Colombia. At the country-level, transitions from overweight to obesity  
26  
27 286 were projected to increase sharply among lower SES adults, particularly among women, suggesting  
28  
29 287 that these groups will undergo an obesity transition by 2030. These patterns were also observed across  
30  
31 288 most regions of Colombia where increases in GDP were predicted to shift the burden of obesity from  
32  
33 289 higher to lower SES groups, also being most evident for women. Although several regions were  
34  
35 290 projected to experience increases in GDP, men in only one region in Colombia (Orinoquia y  
36  
37 291 Amazonia) were expected to undergo an obesity transition by SES over time. At the department-level,  
38  
39 292 trends in the burden of obesity were mixed. For some departments, the burden was projected to shift  
40  
41 293 from higher to lower SES groups, with several of these departments expected to undergo an obesity  
42  
43 294 transition. However, inverse trends were observed in other departments where increases in GDP were  
44  
45 295 accompanied by more rapid increases in obesity prevalence among higher compared to lower SES  
46  
47 296 groups. These patterns support the need for policy planning that considers SES and gender, at the  
48  
49 297 national- and sub-national levels as important determinants of overweight and obesity among adults  
50  
51 298 in Colombia.  
52  
53  
54  
55  
56  
57  
58  
59  
60

1  
2  
3 299 Our overarching finding that the burden of obesity is projected to shift toward lower SES  
4  
5 300 populations, particularly among women, as GDP per capita increases, is consistent with previously  
6  
7 301 published studies focusing predominantly on country-level trends [5–7,9,18,29,52]. For example, a  
8  
9 302 systematic review published in 2004, studying associations between SES and obesity in developing  
10  
11 303 countries found that the burden of obesity shifts to lower SES groups as a country's gross national  
12  
13 304 product (GNP) increases [5]. Furthermore, our results also align with the findings of Jones-Smith et  
14  
15 305 al's study [53]. The authors observed that while overweight and obesity remained most prevalent  
16  
17 306 among higher income individuals in most countries, over time, the prevalence of obesity rose among  
18  
19 307 those with the lowest income as GDP per capita increased. Most recently, using evidence from over  
20  
21 308 30 countries, Jaacks et al. [18] illustrated the different stages of the obesity transition, demonstrating  
22  
23 309 that as the level of economic development increases, the prevalence of obesity is greater in  
24  
25 310 populations with lower SES than in the higher SES, especially in women.

26  
27  
28 311 This paper also provides unique insights into how a system can demonstrate vastly different  
29  
30 312 patterns and behavior at different levels of aggregation. For example, increases in GDP were  
31  
32 313 associated with obesity transition by SES at the country-level and across most regions of Colombia,  
33  
34 314 particularly among women. This patterning however, was not consistently observed at the  
35  
36 315 department-level where seemingly only the departments that experienced sizeable increases in  
37  
38 316 economic development, such as Amazonas, Guanía, Cauca, Valle del Cauca, Boyacá, Antioquia,  
39  
40 317 Tolima, Caldas, San Andres, Santander, Atlántico, Bolívar, Cesar, La Guajira, Magdalena, and Sucre,  
41  
42 318 were projected to undergo an obesity transition by SES, as the GDP per capita increased. These  
43  
44 319 findings are consistent with the study by Jaacks et al. [18] which suggested that variations in obesity  
45  
46 320 transitions at a subnational level may be explained by socioeconomic factors and inequalities. It is  
47  
48 321 also possible that the observed differences across country/ region and department-levels are an artifact  
49  
50 322 of our study's exclusive focus on GDP, the only indicator we had with available data across all time  
51  
52 323 points and at the national- and sub-national levels. Perhaps other indicators, such as the Human  
53  
54 324 Development Index (HDI) or education level, have a more robust relationship with the obesity

1  
2  
3 325 transition across country-, region-, and department-levels [6]. Another potential reason for the  
4  
5 326 observed differences at the department-level could relate to the fact that we were unable to model  
6  
7 327 obesity dynamics by gender, due to data sparsity. Countries in LMIC particularly Latin American  
8  
9 328 countries are very unequal and diverse [54]. As such, the heterogeneity in obesity transitions should  
10  
11 329 be taken into account in the planning of targeted interventions. This study is the first to provide  
12  
13 330 insights at the sub-national-level.

14  
15 331 The current analysis also has important policy implications. For Colombia, the results  
16  
17 332 provides patterns of transition by SES and gender that are crucial to monitor the implementation of  
18  
19 333 policies like the National Policy of Food and Nutrition Security and the obesity law (National law  
20  
21 334 1355/2009), which stipulates that schools should ensure fruit and vegetable availability, implement  
22  
23 335 food education programs, and regulate the consumption of highly caloric foods and beverages. Both  
24  
25 336 policies have intersectoral actions to control the broad spectrum of malnutrition and non-  
26  
27 337 communicable diseases in Colombia. Furthermore, in regions like Amazonia & Orinoquia and  
28  
29 338 Atlántica policies have principally been directed towards tackling undernutrition, but our results also  
30  
31 339 underscore the potential importance of programs aimed at controlling obesity transitions. In fact,  
32  
33 340 policies in Colombia should account for the double burden mainly in low income communities [55].  
34  
35 341 In addition, our results also underscore the importance of programs aimed at preventing obesity which  
36  
37 342 could include physical activity (PA) promotion, healthy eating, and tax schemes for sugar-sweetened  
38  
39 343 beverages and ultra-processed foods. In this context, PA promotion programs like the Hábitos y  
40  
41 344 Estilos de Vida Saludable (HEVS; Healthy Life Habits) program and the taxes on sugar-sweetened  
42  
43 345 beverages are key initiatives. The HEVS program, in which women are more likely to participate,  
44  
45 346 provides free community-based physical activity classes for individuals across Colombia, and has  
46  
47 347 been shown to decrease BMI, waist circumference, and hypertension [56]. Lastly, simulations of the  
48  
49 348 potential impact of a tax on sugar-sweetened beverages shows that it could reduce overweight and  
50  
51 349 obesity prevalence particularly among low SES populations [57].  
52  
53  
54  
55  
56  
57  
58  
59  
60

1  
2  
3 350 The findings of this study should be considered in light of a few limitations. First, the  
4  
5 351 accuracy of the model's predictions is limited given that the TRs between BMI categories could only  
6  
7 352 be estimated using two data points; the 2005 and 2010 ENSIN survey. Future studies should validate  
8  
9 353 model trends against survey data collected over a longer temporal window. Second, we assumed no  
10  
11 354 variation in mortality rates across BMI categories because these data were not available. To this end,  
12  
13 355 future data collection efforts should include more nuanced collection of mortality data and regular  
14  
15 356 assessments of BMI by age, gender, and wealth index at the national- and sub-national levels. Third,  
16  
17 357 our model assumes that the estimated TRs between BMI categories do not change over time. Future  
18  
19 358 extensions of the model should dynamically incorporate the impact of other factors, on temporal  
20  
21 359 changes in BMI TRs and their effects on obesity PR projections by SES. Fourth, our study focuses  
22  
23 360 on GDP per capita as the main indicator of economic development at the country, region, and  
24  
25 361 department-levels. Future studies should explore other measures, such as HDI or education level, that  
26  
27 362 may function as better indicators of social and economic development across all three spatial units.  
28  
29 363 Fifth, given the purpose of the study and aims defined for the SD model, we focus on characterize  
30  
31 364 obesity transition patterns by SES, gender, and age at different levels over time. Nevertheless, it is  
32  
33 365 important to study the effect that the intersectionality between SES and gender could generate in the  
34  
35 366 dynamics of obesity and in the health system. Particularly, it could be important to study and  
36  
37 367 characterize vulnerable population subgroups such as lower SES women who, based on the findings  
38  
39 368 of our study, are increasingly transitioning from overweight to obesity. Therefore, future studies  
40  
41 369 should focus on assess the overlapping categories of inequality that could be involved in the  
42  
43 370 relationship between BMI categories, SES, and gender. Finally, given our finding that trends in  
44  
45 371 obesity transition vary across the national and subnational level, future studies should explore whether  
46  
47 372 threshold effects in GDP could explain these observations, and whether indeed, there exist different  
48  
49 373 critical points for transitions at the country, region, and department-level.  
50  
51  
52  
53  
54 374

## 55 375 **Conclusion**

1  
2  
3 376 Our model suggests that increases in GDP may be associated with shifts in the burden of obesity from  
4  
5 377 higher to lower SES urban dwellers, especially lower SES women. According to the model's  
6  
7 378 projections, by 2030, these shifts could signal obesity transitions among lower SES women. These  
8  
9 379 patterns were consistently observed at the country-level and across most regions in Colombia. There  
10  
11 380 are several implications of these findings, including policy planning at different levels of government  
12  
13 381 and the potential need to target population subgroups at greatest risk of obesity transition in the  
14  
15 382 coming years.

### 18 383 **AUTHORS CONTRIBUTIONS**

20 384 All authors had substantial contributions in the article. Particularly, JDM and OLS designed the study.  
21  
22 385 JDM and VE did the analysis and interpretation of data. JDM, AMR, OLS, FM, IS and JAV led the  
23  
24 386 writing of the report. OLS, JAV, FM, IS and AMR contributed in the analysis and interpretation of  
25  
26 387 data. JDM and JAV developed the mathematical model fully described in the Supplementary  
27  
28 388 information. OLS, IS, AMR, VE and FM reviewed the mathematical model, and JDM implemented  
29  
30 389 the model under the direction of JAV. Finally, all authors drafted sections of the report, provided  
31  
32 390 critical review of the draft, and approved the final version of the manuscript.

### 36 391 **FUNDING**

38  
39 392 This work was supported by project #19-528-ESP of the joint grant of Research Offices at the  
40  
41 393 Universidad de Los Andes and the Universidad de Ibagué. FM was funded by NIH FIC  
42  
43 394 D43TW010540, and by FAPA grant PR.3.2017.4527 of Universidad de los Andes. OLS received  
44  
45 395 funding from the Administrative Department of Science, Technology and Innovation (Colciencias  
46  
47 396 grant number 726-2016) and Vicerrectoria de Investigaciones from Universidad de los Andes. JAV  
48  
49 397 thanks Fondecyt grant 1190703 and the support of Centro para el Desarrollo de la Nanociencias y la  
50  
51 398 Nanotecnología (CEDENNA).

### 54 399 **COMPETING INTERESTS**

1  
2  
3 400 The authors declare no conflict of interest.  
4  
5

6 401 **DATA SHARING STATEMENT**  
7

8  
9 402 All data used in this study are within the paper and its Supplementary files.  
10  
11

12 403 **References**  
13  
14

- 15 404 1 Ng M, Fleming T, Robinson M, *et al.* Global, regional, and national prevalence of overweight  
16 405 and obesity in children and adults during 1980-2013: a systematic analysis for the Global  
17 406 Burden of Disease Study 2013. *The Lancet* 2018;**384**:766–81. doi:10.1016/S0140-  
18 407 6736(14)60460-8
- 20 408 2 Forouzanfar MH, Afshin A, Alexander LT, *et al.* Global, regional, and national comparative  
21 409 risk assessment of 79 behavioural, environmental and occupational, and metabolic risks or  
22 410 clusters of risks, 1990–2015: a systematic analysis for the Global Burden of Disease Study  
23 411 2015. *The Lancet* 2016;**388**:1659–724. doi:10.1016/S0140-6736(16)31679-8
- 25 412 3 World Health Organization. *Global status report on noncommunicable diseases 2014*. WHO  
26 413 Library Cataloguing-in-Publication Data 2014.  
27 414 [http://apps.who.int/iris/bitstream/handle/10665/148114/9789241564854\\_eng.pdf;jsessionid=97](http://apps.who.int/iris/bitstream/handle/10665/148114/9789241564854_eng.pdf;jsessionid=97301FB348D75630E243392FDB4F5584?sequence=1)  
28 414 [301FB348D75630E243392FDB4F5584?sequence=1](http://apps.who.int/iris/bitstream/handle/10665/148114/9789241564854_eng.pdf;jsessionid=97301FB348D75630E243392FDB4F5584?sequence=1)  
29 415
- 31 416 4 Monteiro CA, Conde WL, Lu B, *et al.* Obesity and inequities in health in the developing world.  
32 417 *Int J Obes* 2004;**28**:1181–6. doi:10.1038/sj.ijo.0802716
- 34 418 5 Monteiro CA, Moura EC, Conde WL, *et al.* Socioeconomic status and obesity in adult  
35 419 populations of developing countries : a review. *Public Health Rev* 2004;**82**.
- 37 420 6 Dinsa GD, Goryakin Y, Fumagalli E, *et al.* Obesity and socioeconomic status in developing  
38 421 countries: A systematic review. *Obes Rev* 2012;**13**:1067–79. doi:10.1111/j.1467-  
39 422 789X.2012.01017.x
- 41 423 7 McLaren L. Socioeconomic status and obesity. *Epidemiol Rev* 2007;**29**:29–48.  
42 424 doi:10.1093/epirev/mxm001
- 44 425 8 Abarca-Gómez L, Abdeen ZA, Hamid ZA, *et al.* Worldwide trends in body-mass index,  
45 426 underweight, overweight, and obesity from 1975 to 2016: a pooled analysis of 2416 population-  
46 427 based measurement studies in 128·9 million children, adolescents, and adults. *The Lancet*  
47 428 2017;**390**:2627–42. doi:10.1016/S0140-6736(17)32129-3
- 49 429 9 Jiwani SS, Carrillo-Larco RM, Hernández-Vásquez A, *et al.* The shift of obesity burden by  
50 430 socioeconomic status between 1998 and 2017 in Latin America and the Caribbean: a cross-  
51 431 sectional series study. *Lancet Glob Health* 2019;**7**:e1644–54. doi:10.1016/S2214-  
52 432 109X(19)30421-8  
53 432  
54  
55  
56  
57  
58  
59  
60



- 1  
2  
3 433 10 Zavala JP, Leraç L, Vio F, *et al.* Actividad física y dieta saludable , percepción de peso y estrés  
4 434 en población adulta de Chile : Análisis de la encuesta de calidad de vida y salud 2006. *Arch*  
5 435 *Latinoam Nutr* 2010;**60**:319–25.
- 6  
7 436 11 Monteiro CA, Conde WL, Popkin BM. Income-specific trends in obesity in Brazil: 1975-2003.  
8 437 *Am J Public Health* 2007;**97**:1808–12. doi:10.2105/AJPH.2006.099630
- 9  
10 438 12 Schmidt MI, Duncan BB, E Silva GA, *et al.* Chronic non-communicable diseases in Brazil:  
11 439 Burden and current challenges. *The Lancet* 2011;**377**:1949–61. doi:10.1016/S0140-  
12 440 6736(11)60135-9
- 13  
14 441 13 Parra DC, Iannotti L, Gomez LF, *et al.* The nutrition transition in Colombia over a decade: a  
15 442 novel household classification system of anthropometric measures. *Arch Public Health*  
16 443 2015;**73**:12. doi:10.1186/s13690-014-0057-5
- 17  
18 444 14 Olszowy KM, Dufour DL, Bender RL, *et al.* Socioeconomic status, stature, and obesity in  
19 445 women: 20-year trends in urban Colombia. *Am J Hum Biol* 2012;**24**:602–10.  
20 446 doi:10.1002/ajhb.22280
- 21  
22 447 15 Meisel JD, Sarmiento OL, Olaya C, *et al.* Towards a novel model for studying the nutritional  
23 448 stage dynamics of the Colombian population by age and socioeconomic status. *PLoS ONE*  
24 449 2018;**13**:1–22. doi:10.1371/journal.pone.0191929
- 25  
26 450 16 Pérez-Ferrer C, McMunn A, Zaninotto P, *et al.* The nutrition transition in Mexico 1988–2016:  
27 451 the role of wealth in the social patterning of obesity by education. *Public Health Nutr*  
28 452 2018;**21**:2394–2401. doi:10.1017/S1368980018001167
- 29  
30 453 17 Tumas N, Junyent CR, Aballay LR, *et al.* Nutrition transition profiles and obesity burden in  
31 454 Argentina. *Public Health Nutr* undefined/ed;:1–11. doi:10.1017/S1368980019000429
- 32  
33 455 18 Jaacks LM, Vandevijvere S, Pan A, *et al.* The obesity transition: stages of the global epidemic.  
34 456 *Lancet Diabetes Endocrinol* 2019;**7**:231–40. doi:10.1016/S2213-8587(19)30026-9
- 35  
36 457 19 The World Bank Group. World Bank national accounts data, and OECD National Accounts  
37 458 data files. GDP (current US\$) - Colombia | Data.  
38 459 2018. <https://data.worldbank.org/indicator/NY.GDP.MKTP.CD?locations=CO> (accessed 24 Feb  
39 460 2020).
- 41  
42 461 20 The World Bank Group. GINI index (World Bank estimate) - Colombia | Data.  
43 462 2017. [https://data.worldbank.org/indicator/SI.POV.GINI?contextual=region&end=2017&locatio  
44 463 ns=CO&most\\_recent\\_value\\_desc=true&start=2017&type=shaded&view=bar](https://data.worldbank.org/indicator/SI.POV.GINI?contextual=region&end=2017&locations=CO&most_recent_value_desc=true&start=2017&type=shaded&view=bar) (accessed 24 Feb  
45 464 2020).
- 46  
47 465 21 Instituto Colombiano de Bienestar Familiar ICBF. Encuesta Nacional de la Situación  
48 466 Nutricional en Colombia ENSIN. Bogotá: : Instituto Colombiano de Bienestar Familiar ICBF  
49 467 2005.
- 50  
51 468 22 Instituto Colombiano de Bienestar Familiar ICBF. Encuesta Nacional de la Situación  
52 469 Nutricional en Colombia ENSIN. Bogotá: : Instituto Colombiano de Bienestar Familiar ICBF  
53 470 2010.
- 54  
55  
56  
57  
58  
59  
60

- 1  
2  
3 471 23 Lee BY, Bartsch SM, Mui Y, *et al.* A systems approach to obesity. *Nutr Rev* 2017;**75**:94–106.  
4 472 doi:10.1093/nutrit/nuw049  
5  
6 473 24 Mabry PL, Bures RM. Systems science for obesity-related research questions: An introduction  
7 474 to the theme issue. *Am J Public Health* 2014;**104**:1157–9. doi:10.2105/AJPH.2014.302083  
8  
9 475 25 Sabounchi NS, Hovmand PS, Osgood ND, *et al.* A novel system dynamics model of female  
10 476 obesity and fertility. *Am J Public Health* 2014;**104**:1240–6. doi:10.2105/AJPH.2014.301898  
11  
12 477 26 Fallah-Fini S, Rahmandad H, Huang TTK, *et al.* Modeling US adult obesity trends: A system  
13 478 dynamics model for estimating energy imbalance gap. *Am J Public Health* 2014;**104**:1230–9.  
14 479 doi:10.2105/AJPH.2014.301882  
15  
16 480 27 Abidin NZ, Mamat M, Dangerfield B, *et al.* Combating obesity through healthy eating  
17 481 behavior: A call for system dynamics optimization. *PLoS ONE* 2014;**9**:1–17.  
18 482 doi:10.1371/journal.pone.0114135  
19  
20 483 28 Aktaş G, Tellioğlu N, Barlas Y, *et al.* Modeling the Long Term Dynamics of Obesity As a  
21 484 Societal Epidemic. In: *The 34th International System Dynamics Conference, July 2016, Delft,*  
22 485 *Netherlands MODELING.* 2016. 1–8.  
23  
24 486 29 Chen H-J, Xue H, Liu S, *et al.* Obesity trend in the United States and economic intervention  
25 487 options to change it: A simulation study linking ecological epidemiology and system dynamics  
26 488 modeling. *Public Health* 2018;**161**:20–8. doi:https://doi.org/10.1016/j.puhe.2018.01.013  
27  
28 489 30 Fletcher A, Bonell C, Sorhaindo A. You are what your friends eat: Systematic review of social  
29 490 network analyses of young people’s eating behaviours and bodyweight. *J Epidemiol*  
30 491 *Community Health* 2011;**65**:548–55. doi:10.1136/jech.2010.113936  
31  
32 492 31 Marks J, Barnett LM, Foulkes C, *et al.* Using social network analysis to identify key child care  
33 493 center staff for obesity prevention interventions: A pilot study. *J Obes* 2013;**2013**.  
34 494 doi:10.1155/2013/919287  
35  
36 495 32 Conte KP, Groen S, Loblay V, *et al.* Dynamics behind the scale up of evidence-based obesity  
37 496 prevention: Protocol for a multi-site case study of an electronic implementation monitoring  
38 497 system in health promotion practice. *Implement Sci* 2017;**12**. doi:10.1186/s13012-017-0686-5  
39  
40 498 33 Schaefer DR, Simpkins SD. Using social network analysis to clarify the role of obesity in  
41 499 selection of adolescent friends. *Am J Public Health* 2014;**104**:1223–9.  
42 500 doi:10.2105/AJPH.2013.301768  
43  
44 501 34 Shin H-S, Valente TW, Riggs NR, *et al.* The interaction of social networks and child obesity  
45 502 prevention program effects: The pathways trial. *Obesity* 2014;**22**:1520–6.  
46 503 doi:10.1002/oby.20731  
47  
48 504 35 Hennessy E, Ornstein JT, Economos CD, *et al.* Designing an Agent-Based Model for  
49 505 Childhood Obesity Interventions: A Case Study of ChildObesity180. *Prev Chronic Dis*  
50 506 2016;**13**:E04–E04. doi:10.5888/pcd13.150414  
51  
52 507 36 Orr MG, Kaplan GA, Galea S. Neighbourhood food, physical activity, and educational  
53 508 environments and black/white disparities in obesity: A complex systems simulation analysis. *J*  
54 509 *Epidemiol Community Health* 2016;**70**:862–7. doi:10.1136/jech-2015-205621  
55  
56  
57  
58  
59  
60

- 1  
2  
3 510 37 Hammond RA, Ornstein JT. A model of social influence on body mass index. *Ann N Y Acad*  
4 511 *Sci* 2014;**1331**:34–42. doi:10.1111/nyas.12344
- 5  
6 512 38 Beheshti R, Jalalpour M, Glass TA. Comparing methods of targeting obesity interventions in  
7 513 populations: An agent-based simulation. *SSM - Popul Health* 2017;**3**:211–8.  
8 514 doi:10.1016/j.ssmph.2017.01.006
- 9  
10 515 39 Morshed AB, Kasman M, Heuberger B, *et al.* A systematic review of system dynamics and  
11 516 agent-based obesity models: Evaluating obesity as part of the global syndemic. *Obes Rev*  
12 517 2019;**20**:161–78. doi:10.1111/obr.12877
- 13  
14 518 40 Meisel JD, Sarmiento OL, Olaya C, *et al.* A system dynamics model of the nutritional stages of  
15 519 the Colombian population. *Kybernetics* 2016;**45**:554–70. doi:http://dx.doi.org/10.1108/K-01-  
16 520 2015-0010
- 17  
18 521 41 Departamento Administrativo Nacional de Estadística. Series de población 1985-2020.  
19 522 [https://www.dane.gov.co/index.php/estadisticas-por-tema/demografia-y-poblacion/series-de-](https://www.dane.gov.co/index.php/estadisticas-por-tema/demografia-y-poblacion/series-de-poblacion)  
20 523 [poblacion](https://www.dane.gov.co/index.php/estadisticas-por-tema/demografia-y-poblacion/series-de-poblacion) (accessed 24 Feb 2020).
- 21  
22 524 42 Departamento Administrativo Nacional de Estadística. Proyecciones de población.  
23 525 2011.[https://www.dane.gov.co/index.php/estadisticas-por-tema/demografia-y-](https://www.dane.gov.co/index.php/estadisticas-por-tema/demografia-y-poblacion/proyecciones-de-poblacion)  
24 526 [poblacion/proyecciones-de-poblacion](https://www.dane.gov.co/index.php/estadisticas-por-tema/demografia-y-poblacion/proyecciones-de-poblacion) (accessed 20 Aug 2019).
- 25  
26 527 43 Departamento Administrativo Nacional de Estadística. Estadísticas Vitales.  
27 528 <https://www.dane.gov.co/index.php/estadisticas-por-tema/salud/nacimientos-y-defunciones>  
28 529 (accessed 24 Feb 2020).
- 29  
30 530 44 World Data Bank. World Development Indicators | DataBank.  
31 531 2018.[https://databank.worldbank.org/reports.aspx?source=World%20Development%20Indicato-](https://databank.worldbank.org/reports.aspx?source=World%20Development%20Indicators)  
32 532 [rs](https://databank.worldbank.org/reports.aspx?source=World%20Development%20Indicators) (accessed 26 Aug 2019).
- 33  
34 533 45 World Health Organization. WHO Child Growth Standards: Length/height-for-age, weight-for-  
35 534 age, weight-for-length, weight-for-height and body mass index-for-age: Methods and  
36 535 development. Geneva: 2006.  
37 536 [http://www.who.int/childgrowth/standards/technical\\_report/en/index.html](http://www.who.int/childgrowth/standards/technical_report/en/index.html) (accessed 19 Feb  
38 537 2013).
- 39  
40 538 46 de Onis M, Onyango AW, Borghi E, *et al.* Development of a WHO growth reference for  
41 539 school-aged children and adolescents. *Bull World Health Organ* 2007;**85**:660–7.
- 42  
43 540 47 Clinical guidelines on the identification, evaluation, and treatment of overweight and obesity in  
44 541 adults: executive summary. Expert Panel on the Identification, Evaluation, and Treatment of  
45 542 Overweight in Adults. *Am J Clin Nutr* 1998;**68**:899–917.
- 46  
47 543 48 Departamento Administrativo Nacional de Estadística. Gross domestic product per capita at  
48 544 current prices, base year 2005. Bogotá: 2018.
- 49  
50 545 49 Departamento Administrativo Nacional de Estadística (DANE). Movilidad y migración.  
51 546 [https://www.dane.gov.co/index.php/estadisticas-por-tema/demografia-y-poblacion/movilidad-](https://www.dane.gov.co/index.php/estadisticas-por-tema/demografia-y-poblacion/movilidad-y-migracion)  
52 547 [y-migracion](https://www.dane.gov.co/index.php/estadisticas-por-tema/demografia-y-poblacion/movilidad-y-migracion) (accessed 17 Feb 2020).

- 1  
2  
3 548 50 Rutstein SO, Jonhson K. The DHS Wealth Index. DHS Comparative Reports no. 6. Calverton,  
4 549 MA: : ORC Macro 2004.
- 5  
6 550 51 Fotso J-C, Kuate-Defo B. Measuring socioeconomic status in health research in developing  
7 551 countries: Should we be focusing on households, communities or both? *Soc Indic Res*  
8 552 2005;**72**:189–237. doi:10.1007/s11205-004-5579-8
- 9  
10 553 52 Linando AY, Lee S-K. Socioeconomic, dietary, nutrition, body weight and epidemiologic  
11 554 transitions: three nations at different stage of development. *Prog Nutr* 2018;**20**:602–15.  
12 555 doi:10.23751/pn.v20i4.7274
- 13  
14 556 53 Jones-Smith JC, Gordon-Larsen P, Siddiqi A, *et al.* Is the burden of overweight shifting to the  
15 557 poor across the globe? Time trends among women in 39 low- and middle-income countries  
16 558 (1991–2008). *Int J Obes* 2012;**36**:1114–20. doi:10.1038/ijo.2011.179
- 17  
18 559 54 Diez Roux AV, Slesinski SC, Alazraqui M, *et al.* A Novel International Partnership for  
19 560 Actionable Evidence on Urban Health in Latin America: LAC-Urban Health and SALURBAL.  
20 561 *Glob Chall* 2019;**3**:1800013. doi:10.1002/gch2.201800013
- 21  
22 562 55 Sarmiento OL, Parra DC, González SA, *et al.* The dual burden of malnutrition in Colombia. *Am*  
23 563 *J Clin Nutr* 2014;**100**:1628S-1635S. doi:10.3945/ajcn.114.083816
- 24  
25 564 56 Gaffney LK, Lozano OD, Almanza A, *et al.* The Implementation of a National Physical  
26 565 Activity Intervention in Colombia. *J Phys Act Health* 2019;**16**:430–6. doi:10.1123/jpah.2018-  
27 566 0183
- 28  
29 567 57 Vecino-Ortiz AI, Arroyo-Ariza D. A tax on sugar sweetened beverages in Colombia:  
30 568 Estimating the impact on overweight and obesity prevalence across socio economic levels. *Soc*  
31 569 *Sci Med* 2018;**209**:111–6. doi:10.1016/j.socscimed.2018.05.043

## 570 FIGURES LEGENDS

571 **Figure 1. Estimated transference rates between BMI categories by age and SES for men and**  
572 **women at country level.** (A) Not overweight to overweight ( $\tau_1$ ) for men, (B) overweight to obese  
573 ( $\tau_2$ ) for men, (C) obese to overweight ( $\tau_3$ ) for men, and (D) overweight to not overweight ( $\tau_4$ ) for  
574 men. (E) Not overweight to overweight ( $\tau_1$ ) for women, (F) overweight to obese ( $\tau_2$ ) for women, (G)  
575 obese to overweight ( $\tau_3$ ) for women, and (H) overweight to not overweight ( $\tau_4$ ) for women.

576 **Figure 2. Estimated prevalence rates by BMI category, age, gender, and SES group.** For men:  
577 (A) *Not overweight*, lower SES; (B) *not overweight*, middle SES; (C) *not overweight*, higher SES;  
578 (D) *overweight*, lower SES; (E) *overweight*, middle SES; (F) *overweight*, higher SES; (G) *obese*,  
579 lower SES; (H) *obese*, middle SES; and (I) *obese*, higher SES. For women: (J) Not overweight, lower  
580 SES; (K) not overweight, middle SES; (L) not overweight, higher SES; (M) overweight, lower SES;  
581 (N) overweight, middle SES; (Ñ) overweight, higher SES; (O) *obese*, lower SES; (P) *obese*, middle  
582 SES; and (Q) *obese*, higher SES. Blue = 2005; Green = 2010; Red = 2020; Orange = 2030.

583 **Figure 3. Obesity prevalence ratio amongst urban adults aged 20 to 59 years. A) Men. B)**  
584 **Women**

1  
2  
3 585 **Figure 4. Prevalence ratio of obesity (Lower SES vs Higher SES) amongst urban adults aged**  
4 586 **20 to 59 years vs gross domestic product (GDP) per capita at regional level.** Obesity prevalence  
5 587 ratios greater than one signal obesity transitions by SES. Bubble size based on the total GDP per  
6 588 capita for each region. We calculated the forecast of the GDP per capita from 2017 to 2030. A) Men.  
7 589 B) Women  
8

9 590 **Figure 5. Prevalence ratio of obesity (Lower SES vs Higher SES) amongst urban adults aged**  
10 591 **20 to 59 years vs gross domestic product per capita at department level.** Obesity prevalence ratios  
11 592 greater than one signal obesity transitions by SES. A) Atlántica region. B) Oriental region. C) Central  
12 593 region. D) Pacífica region. E) Orinoquia y Amazonia region. Bubble size based on the gross domestic  
13 594 product per capita. We calculated the forecast of the GNP per capita from 2017 to 2030.  
14  
15  
16  
17  
18  
19  
20  
21  
22  
23  
24  
25  
26  
27  
28  
29  
30  
31  
32  
33  
34  
35  
36  
37  
38  
39  
40  
41  
42  
43  
44  
45  
46  
47  
48  
49  
50  
51  
52  
53  
54  
55  
56  
57  
58  
59  
60

Transference rate ( $\tau_1$ )

A)



Transference rate ( $\tau_1$ )

B)



Transference rate ( $\tau_2$ )

C)

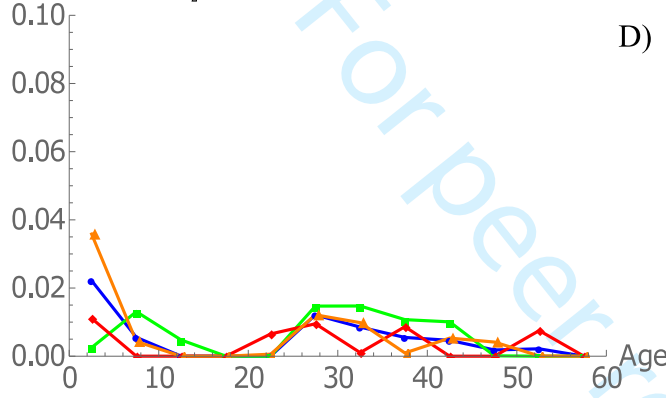

Transference rate ( $\tau_2$ )

D)

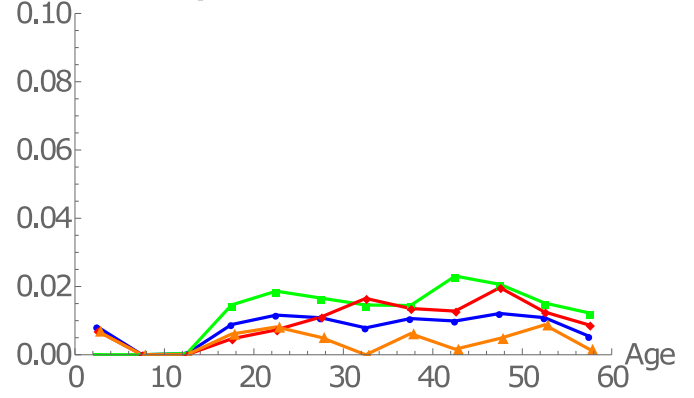

Transference rate ( $\tau_3$ )

E)

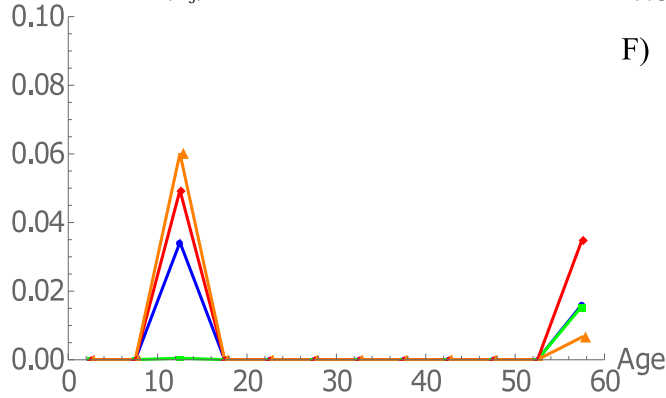

Transference rate ( $\tau_3$ )

F)

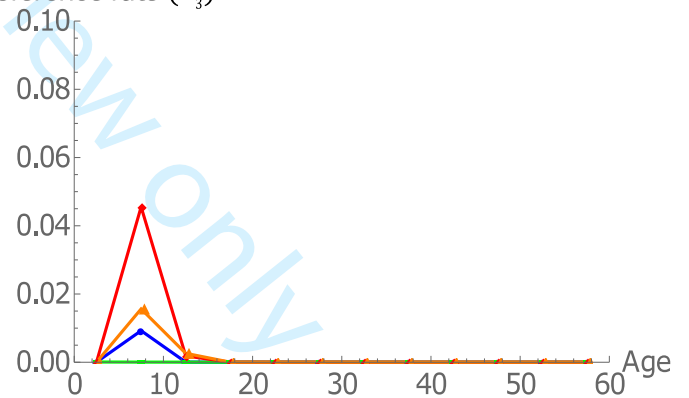

Transference rate ( $\tau_4$ )

G)

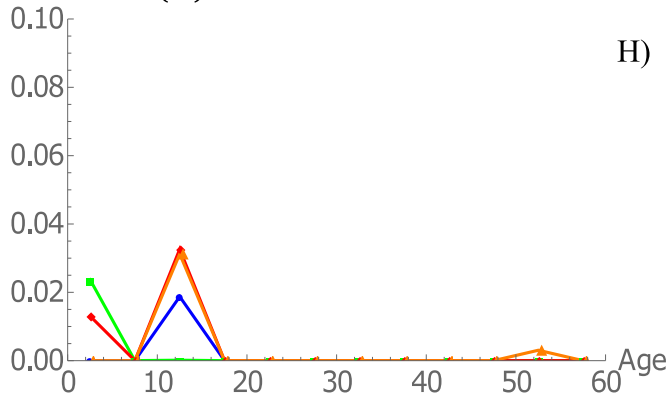

Transference rate ( $\tau_4$ )

H)

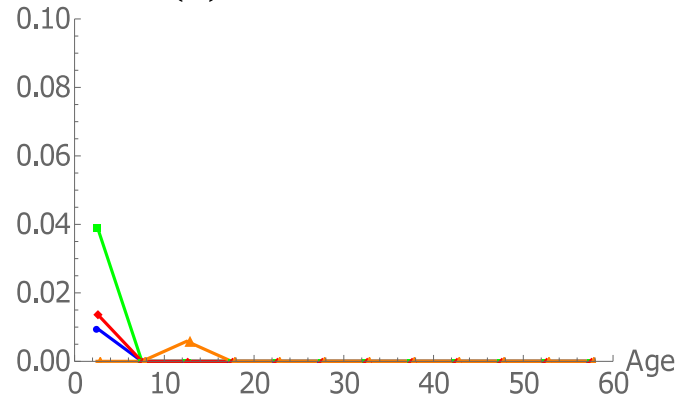

— Complete Population — Lower SES — Middle SES — Higher SES

Not-Overweight prevalence

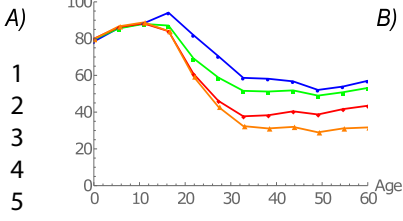

Not-Overweight prevalence

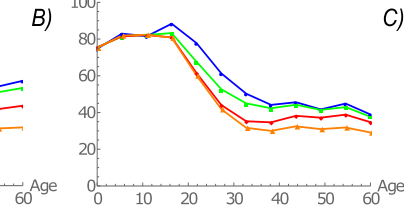

Not-Overweight prevalence

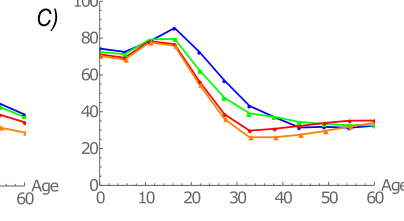

Overweight prevalence

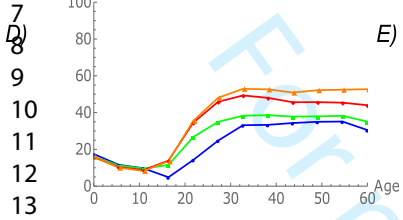

Overweight prevalence

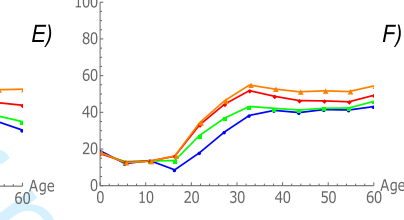

Overweight prevalence

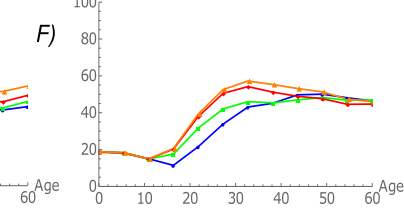

Obese prevalence

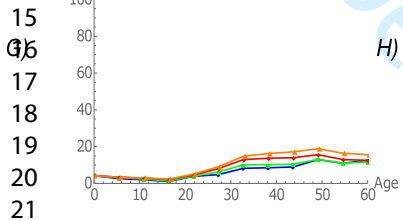

Obese prevalence

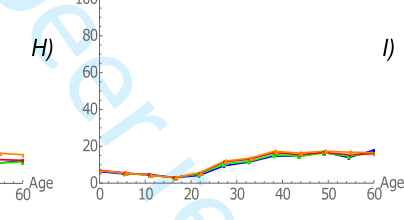

Obese prevalence

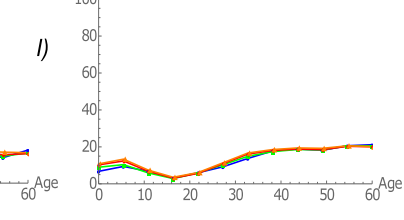

Women

Not-Overweight prevalence

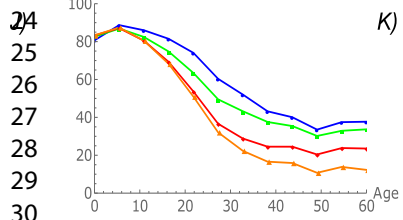

Not-Overweight prevalence

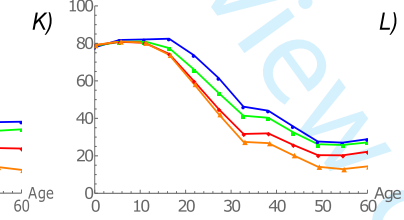

Not-Overweight prevalence

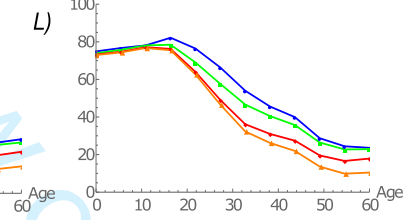

Overweight prevalence

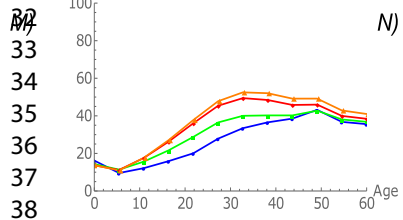

Overweight prevalence

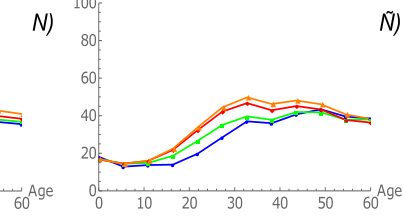

Overweight prevalence

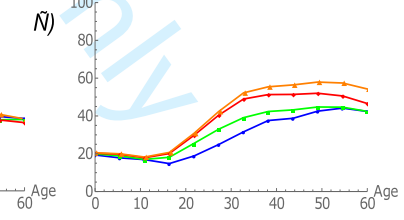

Obese prevalence

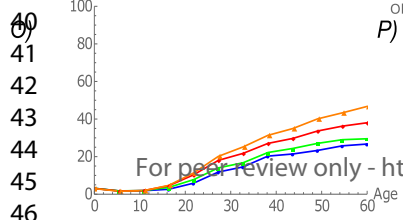

Obese prevalence

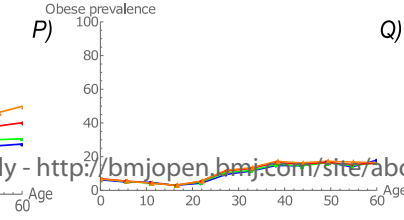

Obese prevalence

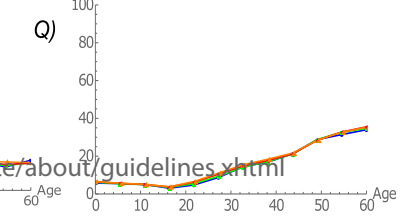

For peer review only - <http://bmjopen.bmj.com/site/about/guidelines.xhtml>

Lower SES

Middle SES

Higher SES

A)

1  
2  
3  
4  
5  
6  
7  
8  
9



B)





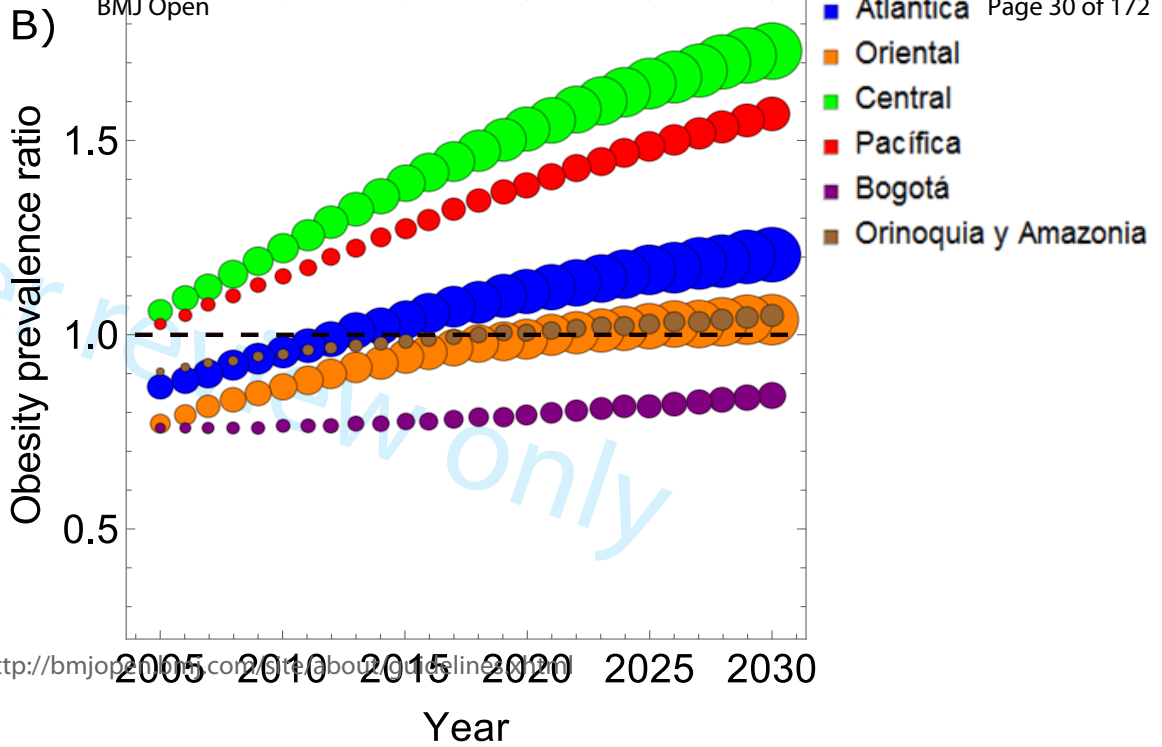



1  
2  
3 **Supplementary Information 1**  
4

5 **Supplement to: Using a system dynamics model to understand the obesity transition**  
6 **by socioeconomic status in Colombia at the country, regional, and department**  
7 **level.**  
8  
9

10  
11  
12  
13  
14  
15  
16  
17  
18  
19  
20  
21  
22  
23  
24  
25  
26  
27  
28  
29  
30  
31  
32  
33  
34  
35  
36  
37  
38  
39  
40  
41  
42  
43  
44  
45  
46  
47  
48  
49  
50  
51  
52  
53  
54  
55  
56  
57  
58  
59  
60

For peer review only

1  
2  
3  
4  
5  
6  
7  
8  
9  
10  
11  
12  
13  
14  
15  
16  
17  
18  
19  
20  
21  
22  
23  
24  
25  
26  
27  
28  
29  
30  
31  
32  
33  
34  
35  
36  
37  
38  
39  
40  
41  
42  
43  
44  
45  
46  
47  
48  
49  
50  
51  
52  
53  
54  
55  
56  
57  
58  
59  
60

**Table of contents**

|                                                                                 |          |
|---------------------------------------------------------------------------------|----------|
| <b>Section 1. Parameters and data used in the model at national level .....</b> | <b>3</b> |
| <b>References .....</b>                                                         | <b>9</b> |

For peer review only

## Section 1. Parameters and data used in the model at national level

The following tables describe the data and parameters used in the two system dynamics (SD) models: SD model of the entire urban population and SD model segregated by socioeconomic status (SES) and to estimate the transference rates (TRs) by age, body mass index (BMI) category, and socioeconomic status (SES) at national level.

**Table 1. Prevalent rates of entire population by age group, gender, and body mass index category in 2005**

| Age Group | Males         |           |         | Females       |           |         |
|-----------|---------------|-----------|---------|---------------|-----------|---------|
|           | Not-Overweigh | Overweigh | Obese   | Not-Overweigh | Overweigh | Obese   |
| 0-4       | 0.76105       | 0.18357   | 0.05537 | 0.76409       | 0.18858   | 0.04733 |
| 5-9       | 0.80877       | 0.13750   | 0.05373 | 0.79520       | 0.15043   | 0.05437 |
| 10-14     | 0.83260       | 0.12485   | 0.04255 | 0.78549       | 0.17204   | 0.04248 |
| 15-19     | 0.89431       | 0.08268   | 0.02301 | 0.79172       | 0.16285   | 0.04543 |
| 20-24     | 0.76938       | 0.18236   | 0.04825 | 0.69604       | 0.22307   | 0.08089 |
| 25-29     | 0.62451       | 0.29679   | 0.07870 | 0.56640       | 0.29998   | 0.13362 |
| 30-34     | 0.50047       | 0.38605   | 0.11349 | 0.45741       | 0.36278   | 0.17981 |
| 35-39     | 0.45259       | 0.40518   | 0.14223 | 0.38965       | 0.39887   | 0.21148 |
| 40-44     | 0.42614       | 0.42564   | 0.14822 | 0.34379       | 0.40650   | 0.24971 |
| 45-49     | 0.39921       | 0.43704   | 0.16375 | 0.28923       | 0.42900   | 0.28178 |
| 50-54     | 0.41231       | 0.42621   | 0.16148 | 0.25499       | 0.41586   | 0.32915 |
| 55-59     | 0.40721       | 0.41261   | 0.18018 | 0.24122       | 0.40478   | 0.35400 |

**Table 2. Prevalent rates of lower socioeconomic status population by age group, gender, and body mass index category in 2005**

| Age Group | Males         |           |         | Females       |           |         |
|-----------|---------------|-----------|---------|---------------|-----------|---------|
|           | Not-Overweigh | Overweigh | Obese   | Not-Overweigh | Overweigh | Obese   |
| 0-4       | 0.78395       | 0.17452   | 0.04153 | 0.80653       | 0.16199   | 0.03148 |
| 5-9       | 0.85783       | 0.11623   | 0.02594 | 0.88696       | 0.09565   | 0.01739 |
| 10-14     | 0.88310       | 0.09725   | 0.01965 | 0.85980       | 0.12157   | 0.01863 |
| 15-19     | 0.94111       | 0.04837   | 0.01052 | 0.81461       | 0.15890   | 0.02648 |
| 20-24     | 0.81901       | 0.14257   | 0.03842 | 0.74058       | 0.20072   | 0.05870 |
| 25-29     | 0.70429       | 0.24785   | 0.04785 | 0.60337       | 0.27862   | 0.11801 |
| 30-34     | 0.58651       | 0.33138   | 0.08211 | 0.52023       | 0.33430   | 0.14547 |
| 35-39     | 0.58167       | 0.33333   | 0.08500 | 0.43189       | 0.36529   | 0.20283 |
| 40-44     | 0.56743       | 0.34326   | 0.08932 | 0.40071       | 0.38526   | 0.21403 |
| 45-49     | 0.52083       | 0.35000   | 0.12917 | 0.33531       | 0.43175   | 0.23294 |
| 50-54     | 0.53915       | 0.35123   | 0.10962 | 0.37478       | 0.36778   | 0.25744 |
| 55-59     | 0.57049       | 0.30492   | 0.12459 | 0.37705       | 0.35597   | 0.26698 |

**Table 3. Prevalent rates of middle socioeconomic status population by age group, gender, and body mass index category in 2005**

| Age Group | Males         |           |         | Females       |           |         |
|-----------|---------------|-----------|---------|---------------|-----------|---------|
|           | Not-Overweigh | Overweigh | Obese   | Not-Overweigh | Overweigh | Obese   |
| 0-4       | 0.74688       | 0.19067   | 0.06245 | 0.77889       | 0.18121   | 0.03990 |
| 5-9       | 0.82955       | 0.12074   | 0.04972 | 0.81805       | 0.12870   | 0.05325 |
| 10-14     | 0.81556       | 0.13689   | 0.04755 | 0.82092       | 0.13725   | 0.04183 |
| 15-19     | 0.88358       | 0.08657   | 0.02985 | 0.82485       | 0.13964   | 0.03550 |
| 20-24     | 0.77792       | 0.18020   | 0.04188 | 0.73680       | 0.19760   | 0.06560 |
| 25-29     | 0.61250       | 0.29306   | 0.09444 | 0.61466       | 0.28448   | 0.10086 |
| 30-34     | 0.50252       | 0.38319   | 0.11429 | 0.46230       | 0.37004   | 0.16766 |
| 35-39     | 0.44158       | 0.41065   | 0.14777 | 0.44085       | 0.35996   | 0.19919 |
| 40-44     | 0.45601       | 0.39856   | 0.14542 | 0.35722       | 0.40728   | 0.23549 |

| Age Group | Males         |           |         | Females       |           |         |
|-----------|---------------|-----------|---------|---------------|-----------|---------|
|           | Not-Overweigh | Overweigh | Obese   | Not-Overweigh | Overweigh | Obese   |
| 45-49     | 0.41702       | 0.41489   | 0.16809 | 0.27633       | 0.43371   | 0.28996 |
| 50-54     | 0.44875       | 0.41274   | 0.13850 | 0.27040       | 0.39520   | 0.33440 |
| 55-59     | 0.38931       | 0.43130   | 0.17939 | 0.28884       | 0.38512   | 0.32604 |

**Table 4. Prevalent rates of higher socioeconomic status population by age group, gender, and body mass index category in 2005**

| Age Group | Males         |           |         | Females       |           |         |
|-----------|---------------|-----------|---------|---------------|-----------|---------|
|           | Not-Overweigh | Overweigh | Obese   | Not-Overweigh | Overweigh | Obese   |
| 0-4       | 0.74297       | 0.18935   | 0.06768 | 0.74901       | 0.19337   | 0.05762 |
| 5-9       | 0.72519       | 0.18066   | 0.09415 | 0.76679       | 0.17827   | 0.05495 |
| 10-14     | 0.78177       | 0.15019   | 0.06804 | 0.78082       | 0.16895   | 0.05023 |
| 15-19     | 0.85472       | 0.11453   | 0.03075 | 0.82160       | 0.14789   | 0.03052 |
| 20-24     | 0.72394       | 0.21580   | 0.06026 | 0.76407       | 0.18831   | 0.04762 |
| 25-29     | 0.56919       | 0.33857   | 0.09225 | 0.66329       | 0.24911   | 0.08760 |
| 30-34     | 0.43184       | 0.43070   | 0.13746 | 0.53989       | 0.31589   | 0.14422 |
| 35-39     | 0.37037       | 0.45139   | 0.17824 | 0.45560       | 0.37591   | 0.16849 |
| 40-44     | 0.31415       | 0.49712   | 0.18872 | 0.39926       | 0.38755   | 0.21319 |
| 45-49     | 0.31790       | 0.50061   | 0.18149 | 0.28693       | 0.42549   | 0.28758 |
| 50-54     | 0.31294       | 0.48080   | 0.20626 | 0.24415       | 0.44150   | 0.31435 |
| 55-59     | 0.32413       | 0.46409   | 0.21179 | 0.23613       | 0.42381   | 0.34006 |

**Table 5. Prevalent rates of entire population by age group, gender, and body mass index category in 2010**

| Age Group | Males         |           |         | Females       |           |         |
|-----------|---------------|-----------|---------|---------------|-----------|---------|
|           | Not-Overweigh | Overweigh | Obese   | Not-Overweigh | Overweigh | Obese   |
| 0-4       | 0.73680       | 0.20456   | 0.05864 | 0.76409       | 0.18858   | 0.04733 |
| 5-9       | 0.76332       | 0.15196   | 0.08472 | 0.79520       | 0.15043   | 0.05437 |
| 10-14     | 0.77794       | 0.15256   | 0.06950 | 0.78549       | 0.17204   | 0.04248 |
| 15-19     | 0.85366       | 0.11398   | 0.03236 | 0.79172       | 0.16285   | 0.04543 |
| 20-24     | 0.73185       | 0.20473   | 0.06342 | 0.69604       | 0.22307   | 0.08089 |
| 25-29     | 0.53510       | 0.34540   | 0.11950 | 0.56640       | 0.29998   | 0.13362 |
| 30-34     | 0.44255       | 0.39099   | 0.16646 | 0.45741       | 0.36278   | 0.17981 |
| 35-39     | 0.39937       | 0.42872   | 0.17191 | 0.38965       | 0.39887   | 0.21148 |
| 40-44     | 0.36702       | 0.44594   | 0.18704 | 0.34379       | 0.40650   | 0.24971 |
| 45-49     | 0.37109       | 0.44759   | 0.18132 | 0.28923       | 0.42900   | 0.28178 |
| 50-54     | 0.36376       | 0.45504   | 0.18120 | 0.25499       | 0.41586   | 0.32915 |
| 55-59     | 0.38500       | 0.43760   | 0.17739 | 0.24122       | 0.40478   | 0.35400 |

**Table 6. Prevalent rates of lower socioeconomic status population by age group, gender, and body mass index category in 2010**

| Age Group | Males         |           |         | Females       |           |         |
|-----------|---------------|-----------|---------|---------------|-----------|---------|
|           | Not-Overweigh | Overweigh | Obese   | Not-Overweigh | Overweigh | Obese   |
| 0-4       | 0.73872       | 0.21008   | 0.05120 | 0.76813       | 0.18952   | 0.04235 |
| 5-9       | 0.81081       | 0.13745   | 0.05174 | 0.84693       | 0.11389   | 0.03918 |
| 10-14     | 0.83917       | 0.11708   | 0.04375 | 0.81566       | 0.14739   | 0.03695 |
| 15-19     | 0.88342       | 0.09347   | 0.02312 | 0.78310       | 0.17442   | 0.04248 |
| 20-24     | 0.76115       | 0.17639   | 0.06246 | 0.66899       | 0.23826   | 0.09275 |
| 25-29     | 0.56088       | 0.33523   | 0.10390 | 0.52527       | 0.31441   | 0.16032 |
| 30-34     | 0.50181       | 0.35481   | 0.14338 | 0.40909       | 0.37216   | 0.21875 |
| 35-39     | 0.46410       | 0.37565   | 0.16025 | 0.36917       | 0.39763   | 0.23320 |
| 40-44     | 0.41073       | 0.42059   | 0.16867 | 0.32658       | 0.39517   | 0.27825 |
| 45-49     | 0.45012       | 0.39549   | 0.15439 | 0.29107       | 0.39097   | 0.31796 |
| 50-54     | 0.45231       | 0.39740   | 0.15029 | 0.27503       | 0.40484   | 0.32013 |
| 55-59     | 0.47929       | 0.39842   | 0.12229 | 0.28418       | 0.38556   | 0.33026 |

**Table 7. Prevalent rates of middle socioeconomic status population by age group, gender, and body mass index category in 2010**

| Age Group | Males         |           |         | Females       |           |         |
|-----------|---------------|-----------|---------|---------------|-----------|---------|
|           | Not-Overweigh | Overweigh | Obese   | Not-Overweigh | Overweigh | Obese   |
| 0-4       | 0.74826       | 0.19360   | 0.05814 | 0.77592       | 0.18416   | 0.03992 |
| 5-9       | 0.76653       | 0.15307   | 0.08041 | 0.79742       | 0.14988   | 0.05269 |
| 10-14     | 0.78466       | 0.15682   | 0.05852 | 0.78575       | 0.17370   | 0.04055 |
| 15-19     | 0.85288       | 0.11458   | 0.03254 | 0.80732       | 0.14946   | 0.04322 |
| 20-24     | 0.74719       | 0.19654   | 0.05628 | 0.69790       | 0.22132   | 0.08079 |
| 25-29     | 0.55112       | 0.32522   | 0.12366 | 0.57692       | 0.29487   | 0.12821 |
| 30-34     | 0.44526       | 0.38421   | 0.17053 | 0.45881       | 0.36490   | 0.17629 |
| 35-39     | 0.39230       | 0.45608   | 0.15162 | 0.38689       | 0.37377   | 0.23934 |
| 40-44     | 0.37437       | 0.42839   | 0.19724 | 0.35059       | 0.38285   | 0.26655 |
| 45-49     | 0.37736       | 0.45687   | 0.16577 | 0.27349       | 0.42326   | 0.30326 |
| 50-54     | 0.38679       | 0.43962   | 0.17358 | 0.25197       | 0.38583   | 0.36220 |
| 55-59     | 0.39286       | 0.42634   | 0.18080 | 0.24806       | 0.37209   | 0.37984 |

**Table 8. Prevalent rates of higher socioeconomic status population by age group, gender, and body mass index category in 2010**

| Age Group | Males         |           |         | Females       |           |         |
|-----------|---------------|-----------|---------|---------------|-----------|---------|
|           | Not-Overweigh | Overweigh | Obese   | Not-Overweigh | Overweigh | Obese   |
| 0-4       | 0.72199       | 0.20775   | 0.07026 | 0.74656       | 0.19149   | 0.06195 |
| 5-9       | 0.69791       | 0.17015   | 0.13194 | 0.72241       | 0.20088   | 0.07671 |
| 10-14     | 0.70526       | 0.18810   | 0.10664 | 0.75157       | 0.19821   | 0.05022 |
| 15-19     | 0.82515       | 0.13360   | 0.04126 | 0.78875       | 0.16144   | 0.04981 |
| 20-24     | 0.69251       | 0.23779   | 0.06971 | 0.71908       | 0.21069   | 0.07023 |
| 25-29     | 0.49887       | 0.37040   | 0.13073 | 0.59451       | 0.29121   | 0.11429 |
| 30-34     | 0.38442       | 0.43065   | 0.18493 | 0.49567       | 0.35355   | 0.15078 |
| 35-39     | 0.34673       | 0.45514   | 0.19813 | 0.40641       | 0.41729   | 0.17630 |
| 40-44     | 0.33097       | 0.47518   | 0.19385 | 0.35115       | 0.42872   | 0.22013 |
| 45-49     | 0.30837       | 0.48018   | 0.21145 | 0.29707       | 0.45293   | 0.25000 |
| 50-54     | 0.28793       | 0.50464   | 0.20743 | 0.24590       | 0.43735   | 0.31674 |
| 55-59     | 0.32332       | 0.46755   | 0.20913 | 0.21780       | 0.42909   | 0.35311 |

**Table 9. Fraction of births by body mass index category, gender, and socioeconomic status<sup>†</sup>**

| Population Group (%/year) | Males         |           |       | Females       |           |       |
|---------------------------|---------------|-----------|-------|---------------|-----------|-------|
|                           | Not-Overweigh | Overweigh | Obese | Not-Overweigh | Overweigh | Obese |
| Lower SES                 | 82.26         | 12.60     | 5.14  | 82.26         | 12.60     | 5.14  |
| Middle SES                | 77.87         | 13.11     | 9.02  | 77.87         | 13.11     | 9.02  |
| Higher SES                | 77.90         | 16.67     | 5.43  | 77.90         | 16.67     | 5.43  |
| Complete Urban Population | 79.76         | 13.97     | 6.27  | 79.76         | 13.97     | 6.27  |

<sup>†</sup> The fractions of births by each BMI category correspond to the prevalences by BMI category of children aged 0 to 12 months

**Table 10. Man mortality rates and population size by age group without segregate by socioeconomic status<sup>†</sup>**

| Age group | Mortality rates (R) (%/year) | Not- overweight men in 2005 (Number of people) <sup>1</sup> | Overweight men in 2005 (Number of people) <sup>2</sup> | Obese men in 2005 (Number of people) <sup>3</sup> |
|-----------|------------------------------|-------------------------------------------------------------|--------------------------------------------------------|---------------------------------------------------|
| 0-4       | 0,00357                      | 1165482                                                     | 281127                                                 | 84801                                             |
| 5-9       | 0,00032                      | 1289072                                                     | 219149                                                 | 85644                                             |
| 10-14     | 0,00033                      | 1359604                                                     | 203875                                                 | 69488                                             |
| 15-19     | 0,00155                      | 1374888                                                     | 127116                                                 | 35377                                             |
| 20-24     | 0,00293                      | 1058824                                                     | 250967                                                 | 66405                                             |
| 25-29     | 0,00305                      | 771818                                                      | 366795                                                 | 97264                                             |
| 30-34     | 0,00296                      | 541980                                                      | 418070                                                 | 122902                                            |
| 35-39     | 0,00284                      | 489080                                                      | 437848                                                 | 153696                                            |
| 40-44     | 0,00310                      | 436635                                                      | 436122                                                 | 151873                                            |
| 45-49     | 0,00384                      | 337634                                                      | 369630                                                 | 138492                                            |
| 50-54     | 0,00574                      | 276901                                                      | 286235                                                 | 108449                                            |
| 55-59     | 0,00798                      | 210765                                                      | 213563                                                 | 93259                                             |

<sup>†</sup>Values used in this table are for the urban population

<sup>1</sup> Initial value used in the stock of not-overweight population in 2005.

<sup>2</sup> Initial value used in the stock of overweight population in 2005.

<sup>3</sup> Initial value used in the stock of obese population in 2005.

**Table 11. Women mortality rates and population size by age group without segregate by socioeconomic status<sup>†</sup>**

| Age group | Mortality rates (R) (%/year) | Not- overweight women in 2005 (Number of people) <sup>1</sup> | Overweight women in 2005 (Number of people) <sup>2</sup> | Obese women in 2005 (Number of people) <sup>3</sup> |
|-----------|------------------------------|---------------------------------------------------------------|----------------------------------------------------------|-----------------------------------------------------|
| 0-4       | 0,00289                      | 1126474                                                       | 278023                                                   | 69772                                               |
| 5-9       | 0,00023                      | 1227412                                                       | 232199                                                   | 83921                                               |
| 10-14     | 0,00024                      | 1244635                                                       | 272604                                                   | 67304                                               |
| 15-19     | 0,00049                      | 1219614                                                       | 250871                                                   | 69976                                               |
| 20-24     | 0,00066                      | 1026858                                                       | 329092                                                   | 119328                                              |
| 25-29     | 0,00065                      | 762616                                                        | 403902                                                   | 179915                                              |
| 30-34     | 0,00085                      | 552648                                                        | 438307                                                   | 217248                                              |
| 35-39     | 0,00107                      | 480958                                                        | 492333                                                   | 261042                                              |
| 40-44     | 0,00146                      | 403077                                                        | 476607                                                   | 292781                                              |
| 45-49     | 0,00218                      | 285037                                                        | 422785                                                   | 277697                                              |
| 50-54     | 0,00337                      | 199382                                                        | 325166                                                   | 257368                                              |
| 55-59     | 0,00523                      | 146397                                                        | 245658                                                   | 214837                                              |

<sup>†</sup>Values used in this table are for the urban population

<sup>1</sup> Initial value used in the stock of not-overweight population in 2005.

<sup>2</sup> Initial value used in the stock of overweight population in 2005.

<sup>3</sup> Initial value used in the stock of obese population in 2005.

**Table 12. Man mortality rates and population size by age group for the lower socioeconomic status population<sup>†</sup>**

| Age group | Mortality rates (R) (%/year) | Not- overweight men in 2005 (Number of people) <sup>1</sup> | Overweight men in 2005 (Number of people) <sup>2</sup> | Obese men in 2005 (Number of people) <sup>3</sup> |
|-----------|------------------------------|-------------------------------------------------------------|--------------------------------------------------------|---------------------------------------------------|
| 0-4       | 0,00357                      | 497762                                                      | 110812                                                 | 26367                                             |
| 5-9       | 0,00032                      | 562355                                                      | 76198                                                  | 17003                                             |
| 10-14     | 0,00033                      | 589337                                                      | 64899                                                  | 13111                                             |
| 15-19     | 0,00155                      | 536644                                                      | 27582                                                  | 5996                                              |
| 20-24     | 0,00293                      | 370955                                                      | 64574                                                  | 17403                                             |
| 25-29     | 0,00305                      | 277758                                                      | 97748                                                  | 18872                                             |
| 30-34     | 0,00296                      | 201479                                                      | 113836                                                 | 28207                                             |
| 35-39     | 0,00284                      | 184329                                                      | 105633                                                 | 26936                                             |



|       |         |        |        |       |
|-------|---------|--------|--------|-------|
| 40-44 | 0,00310 | 166239 | 100565 | 26167 |
| 45-49 | 0,00384 | 119390 | 80230  | 29609 |
| 50-54 | 0,00574 | 107116 | 69781  | 21779 |
| 55-59 | 0,00798 | 497762 | 110812 | 26367 |

†Values used in this table are for the urban population

<sup>1</sup> Initial value used in the stock of not-overweight population in 2005 for lower SES.

<sup>2</sup> Initial value used in the stock of overweight population in 2005 for lower SES.

<sup>3</sup> Initial value used in the stock of obese population in 2005 for lower SES.

**Table 13. Women mortality rates and population size by age group for the lower socioeconomic status population<sup>†</sup>**

| Age group | Mortality rates (R) (%/year) | Not- overweight women in 2005 (Number of people) <sup>1</sup> | Overweight women in 2005 (Number of people) <sup>2</sup> | Obese women in 2005 (Number of people) <sup>3</sup> |
|-----------|------------------------------|---------------------------------------------------------------|----------------------------------------------------------|-----------------------------------------------------|
| 0-4       | 0,00289                      | 492988                                                        | 99017                                                    | 19244                                               |
| 5-9       | 0,00023                      | 563089                                                        | 60725                                                    | 11041                                               |
| 10-14     | 0,00024                      | 556772                                                        | 78723                                                    | 12062                                               |
| 15-19     | 0,00049                      | 465440                                                        | 90792                                                    | 15132                                               |
| 20-24     | 0,00066                      | 359582                                                        | 97460                                                    | 28499                                               |
| 25-29     | 0,00065                      | 259242                                                        | 119709                                                   | 50705                                               |
| 30-34     | 0,00085                      | 199380                                                        | 128120                                                   | 55753                                               |
| 35-39     | 0,00107                      | 156332                                                        | 132225                                                   | 73418                                               |
| 40-44     | 0,00146                      | 134336                                                        | 129154                                                   | 71752                                               |
| 45-49     | 0,00218                      | 89565                                                         | 115324                                                   | 62220                                               |
| 50-54     | 0,00337                      | 86692                                                         | 85072                                                    | 59550                                               |
| 55-59     | 0,00523                      | 62876                                                         | 59361                                                    | 44521                                               |

†Values used in this table are for the urban population

<sup>1</sup> Initial value used in the stock of not-overweight population in 2005 for lower SES.

<sup>2</sup> Initial value used in the stock of overweight population in 2005 for lower SES.

<sup>3</sup> Initial value used in the stock of obese population in 2005 for lower SES.

**Table 14. Man mortality rates and population size by age group for the middle socioeconomic status population<sup>†</sup>**

| Age group | Mortality rates (R) (%/year) | Not- overweight men in 2005 (Number of people) <sup>1</sup> | Overweight men in 2005 (Number of people) <sup>2</sup> | Obese men in 2005 (Number of people) <sup>3</sup> |
|-----------|------------------------------|-------------------------------------------------------------|--------------------------------------------------------|---------------------------------------------------|
| 0-4       | 0,00357                      | 319608                                                      | 81594                                                  | 26723                                             |
| 5-9       | 0,00032                      | 367767                                                      | 53528                                                  | 22041                                             |
| 10-14     | 0,00033                      | 371039                                                      | 62277                                                  | 21633                                             |
| 15-19     | 0,00155                      | 354964                                                      | 34777                                                  | 11992                                             |
| 20-24     | 0,00293                      | 280735                                                      | 65032                                                  | 15113                                             |
| 25-29     | 0,00305                      | 213399                                                      | 102103                                                 | 32905                                             |
| 30-34     | 0,00296                      | 150606                                                      | 114843                                                 | 34252                                             |
| 35-39     | 0,00284                      | 135738                                                      | 126231                                                 | 45422                                             |
| 40-44     | 0,00310                      | 130323                                                      | 113905                                                 | 41560                                             |
| 45-49     | 0,00384                      | 93601                                                       | 93124                                                  | 37727                                             |
| 50-54     | 0,00574                      | 72003                                                       | 66225                                                  | 22223                                             |
| 55-59     | 0,00798                      | 47562                                                       | 52691                                                  | 21916                                             |

†Values used in this table are for the urban population

<sup>1</sup> Initial value used in the stock of not-overweight population in 2005 for middle SES.

<sup>2</sup> Initial value used in the stock of overweight population in 2005 for middle SES.

<sup>3</sup> Initial value used in the stock of obese population in 2005 for middle SES.

**Table 15. Women mortality rates and population size by age group for the middle socioeconomic status population<sup>†</sup>**

| Age group | Mortality rates (R) (%/year) | Not- overweight women in 2005 (Number of people) <sup>1</sup> | Overweight women in 2005 (Number of people) <sup>2</sup> | Obese women in 2005 (Number of people) <sup>3</sup> |
|-----------|------------------------------|---------------------------------------------------------------|----------------------------------------------------------|-----------------------------------------------------|
| 0-4       | 0,00289                      | 320869                                                        | 74652                                                    | 16437                                               |
| 5-9       | 0,00023                      | 351216                                                        | 55255                                                    | 22864                                               |
| 10-14     | 0,00024                      | 362400                                                        | 60592                                                    | 18466                                               |
| 15-19     | 0,00049                      | 332035                                                        | 56212                                                    | 14291                                               |
| 20-24     | 0,00066                      | 285040                                                        | 76444                                                    | 25378                                               |
| 25-29     | 0,00065                      | 233307                                                        | 107982                                                   | 38285                                               |
| 30-34     | 0,00085                      | 154577                                                        | 123728                                                   | 56059                                               |
| 35-39     | 0,00107                      | 154789                                                        | 126387                                                   | 69939                                               |
| 40-44     | 0,00146                      | 116820                                                        | 133190                                                   | 77012                                               |
| 45-49     | 0,00218                      | 72273                                                         | 113433                                                   | 75838                                               |
| 50-54     | 0,00337                      | 50514                                                         | 73828                                                    | 62470                                               |
| 55-59     | 0,00523                      | 41376                                                         | 55168                                                    | 46705                                               |

<sup>†</sup>Values used in this table are for the urban population

<sup>1</sup> Initial value used in the stock of not-overweight population in 2005 for middle SES.

<sup>2</sup> Initial value used in the stock of overweight population in 2005 for middle SES.

<sup>3</sup> Initial value used in the stock of obese population in 2005 for middle SES.

**Table 16. Man mortality rates and population size by age group for the higher socioeconomic status population<sup>†</sup>**

| Age group | Mortality rates (R) (%/year) | Not- overweight men in 2005 (Number of people) <sup>1</sup> | Overweight men in 2005 (Number of people) <sup>2</sup> | Obese men in 2005 (Number of people) <sup>3</sup> |
|-----------|------------------------------|-------------------------------------------------------------|--------------------------------------------------------|---------------------------------------------------|
| 0-4       | 0,00357                      | 348113                                                      | 88721                                                  | 31711                                             |
| 5-9       | 0,00032                      | 358950                                                      | 89423                                                  | 46601                                             |
| 10-14     | 0,00033                      | 399228                                                      | 76699                                                  | 34744                                             |
| 15-19     | 0,00155                      | 483279                                                      | 64757                                                  | 17388                                             |
| 20-24     | 0,00293                      | 407134                                                      | 121362                                                 | 33890                                             |
| 25-29     | 0,00305                      | 280661                                                      | 166945                                                 | 45486                                             |
| 30-34     | 0,00296                      | 189894                                                      | 189391                                                 | 60444                                             |
| 35-39     | 0,00284                      | 169012                                                      | 205984                                                 | 81337                                             |
| 40-44     | 0,00310                      | 140072                                                      | 221653                                                 | 84146                                             |
| 45-49     | 0,00384                      | 124643                                                      | 196277                                                 | 71156                                             |
| 50-54     | 0,00574                      | 97782                                                       | 150229                                                 | 64447                                             |
| 55-59     | 0,00798                      | 82068                                                       | 117506                                                 | 53624                                             |

<sup>†</sup>Values used in this table are for the urban population

<sup>1</sup> Initial value used in the stock of not-overweight population in 2005 for higher SES.

<sup>2</sup> Initial value used in the stock of overweight population in 2005 for higher SES.

<sup>3</sup> Initial value used in the stock of obese population in 2005 for higher SES.

**Table 17. Women mortality rates and population size by age group for the higher socioeconomic status population<sup>†</sup>**

| Age group | Mortality rates (R) (%/year) | Not- overweight women in 2005 (Number of people) <sup>1</sup> | Overweight women in 2005 (Number of people) <sup>2</sup> | Obese women in 2005 (Number of people) <sup>3</sup> |
|-----------|------------------------------|---------------------------------------------------------------|----------------------------------------------------------|-----------------------------------------------------|
| 0-4       | 0,00289                      | 337851                                                        | 87222                                                    | 25989                                               |
| 5-9       | 0,00023                      | 367555                                                        | 85451                                                    | 26338                                               |
| 10-14     | 0,00024                      | 386919                                                        | 83719                                                    | 24890                                               |
| 15-19     | 0,00049                      | 465482                                                        | 83787                                                    | 17289                                               |
| 20-24     | 0,00066                      | 460639                                                        | 113529                                                   | 28708                                               |
| 25-29     | 0,00065                      | 356321                                                        | 133820                                                   | 47061                                               |

|              |         |        |        |        |
|--------------|---------|--------|--------|--------|
| <b>30-34</b> | 0,00085 | 264860 | 154972 | 70755  |
| <b>35-39</b> | 0,00107 | 237476 | 195942 | 87825  |
| <b>40-44</b> | 0,00146 | 203703 | 197731 | 108768 |
| <b>45-49</b> | 0,00218 | 131088 | 194393 | 131387 |
| <b>50-54</b> | 0,00337 | 88819  | 160613 | 114358 |
| <b>55-59</b> | 0,00523 | 70102  | 125824 | 100959 |

†Values used in this table are for the urban population

<sup>1</sup> Initial value used in the stock of not-overweight population in 2005 for higher SES.

<sup>2</sup> Initial value used in the stock of overweight population in 2005 for higher SES.

<sup>3</sup> Initial value used in the stock of obese population in 2005 for higher SES.

**Table 18. Data and projections of the Fertility rates†**

| <b>Year</b> | <b>Fertility rate</b> | <b>Year</b> | <b>Fertility rate</b> | <b>Year</b> | <b>Fertility rate</b> |
|-------------|-----------------------|-------------|-----------------------|-------------|-----------------------|
| 1960        | 6.807                 | 1985        | 3.420                 | 2010        | 2.010                 |
| 1961        | 6.801                 | 1986        | 3.320                 | 2011        | 1.978                 |
| 1962        | 6.779                 | 1987        | 3.227                 | 2012        | 1.948                 |
| 1963        | 6.736                 | 1988        | 3.142                 | 2013        | 1.921                 |
| 1964        | 6.668                 | 1989        | 3.065                 | 2014        | 1.897                 |
| 1965        | 6.567                 | 1990        | 2.994                 | 2015        | 1.874                 |
| 1966        | 6.425                 | 1991        | 2.927                 | 2016        | 1.851                 |
| 1967        | 6.246                 | 1992        | 2.860                 | 2017        | 1.828                 |
| 1968        | 6.034                 | 1993        | 2.794                 | 2018        | 1.805                 |
| 1969        | 5.797                 | 1994        | 2.727                 | 2019        | 1.782                 |
| 1970        | 5.548                 | 1995        | 2.660                 | 2020        | 1.759                 |
| 1971        | 5.300                 | 1996        | 2.596                 | 2021        | 1.736                 |
| 1972        | 5.067                 | 1997        | 2.535                 | 2022        | 1.713                 |
| 1973        | 4.857                 | 1998        | 2.481                 | 2023        | 1.690                 |
| 1974        | 4.675                 | 1999        | 2.432                 | 2024        | 1.667                 |
| 1975        | 4.523                 | 2000        | 2.389                 | 2025        | 1.644                 |
| 1976        | 4.396                 | 2001        | 2.349                 | 2026        | 1.621                 |
| 1977        | 4.284                 | 2002        | 2.311                 | 2027        | 1.598                 |
| 1978        | 4.177                 | 2003        | 2.274                 | 2028        | 1.575                 |
| 1979        | 4.071                 | 2004        | 2.236                 | 2029        | 1.552                 |
| 1980        | 3.965                 | 2005        | 2.197                 | 2030        | 1.529                 |
| 1981        | 3.855                 | 2006        | 2.157                 |             |                       |
| 1982        | 3.744                 | 2007        | 2.118                 |             |                       |
| 1983        | 3.634                 | 2008        | 2.080                 |             |                       |
| 1984        | 3.526                 | 2009        | 2.044                 |             |                       |

† Data of Fertility rate of world Data Bank(1960–2015)[1] was used to forecast the fertility rate from 2015 to 2030. Holt-Winters no seasonal method in EViews 5 (Quantitative Micro Software, LLC) was used to forecast the fertility rate. In the SD model we used data from 2005 to 2030.

## References

- 1 World Data Bank. World Development Indicators. <http://databank.worldbank.org/data/reports.aspx?source=World%20Development%20Indicators> (accessed 22 Aug 2019).

1  
2  
3  
4  
5  
6  
7  
8  
9  
10  
11  
12  
13  
14  
15  
16  
17  
18  
19  
20  
21  
22  
23  
24  
25  
26  
27  
28  
29  
30  
31  
32  
33  
34  
35  
36  
37  
38  
39  
40  
41  
42  
43  
44  
45  
46  
47  
48  
49  
50  
51  
52  
53  
54  
55  
56  
57  
58  
59  
60

**Supplementary Information 2**

**Supplement to: Using a system dynamics model to Uunderstand the obesity transition by socioeconomic status in Colombia at the country, regional, and department level.**

For peer review only

## Table of contents

|                                                                                        |     |
|----------------------------------------------------------------------------------------|-----|
| Section 1. Parameters and data used in the model at regional and department level..... | 3   |
| 1.1 Caribe region.....                                                                 | 3   |
| 1.1.1 Data and model parameters used.....                                              | 3   |
| 1.2 Oriental region.....                                                               | 30  |
| 1.2.1 Data and model parameters used.....                                              | 30  |
| 1.3 Central region.....                                                                | 50  |
| 1.3.1 Data and model parameters used.....                                              | 50  |
| 1.4 Pacifica Region.....                                                               | 75  |
| 1.4.1 Data and model parameters used.....                                              | 75  |
| 1.5 Bogotá.....                                                                        | 93  |
| 1.5.1 Data and model parameters used.....                                              | 93  |
| 1.6 Orinoquia y Amazonia region.....                                                   | 100 |
| 1.6.1 Data and model parameters used.....                                              | 100 |
| References.....                                                                        | 124 |

## Section 1. Parameters and data used in the model at regional and department level

The following tables describe the data and parameters used in the two system dynamics (SD) models: SD model of the entire urban population and SD model segregated by socioeconomic status (SES) and to estimate the transference rates (TRs) by age, body mass index (BMI) category, and socioeconomic status (SES) at regional and department level.

### 1.1 Caribe region

The Caribbean region of Colombia is located in the north-western area of the national territory and consists of eight departments and the island region of San Andres, the departments are:

- Atlántico (08)
- Bolívar (13)
- Cesar (20)
- Córdoba (23)
- La Guajira (44)
- Magdalena (47)
- Sucre (70)
- San Andrés (88)

#### 1.1.1 Data and model parameters used

**Table 1. Prevalent rates of entire population by age group, gender, and body mass index category in 2005 (Caribe region)**

| Age Group | Nutritional State Males |           |         | Nutritional State Females |           |         |
|-----------|-------------------------|-----------|---------|---------------------------|-----------|---------|
|           | Not-Overweigh           | Overweigh | Obese   | Not-Overweigh             | Overweigh | Obese   |
| 0-4       | 0,74780                 | 0,20256   | 0,04964 | 0,80065                   | 0,16436   | 0,03499 |
| 5-9       | 0,83481                 | 0,10835   | 0,05684 | 0,84971                   | 0,11753   | 0,03276 |
| 10-14     | 0,87175                 | 0,09359   | 0,03466 | 0,85540                   | 0,12544   | 0,01916 |
| 15-19     | 0,90159                 | 0,07381   | 0,02460 | 0,85434                   | 0,12254   | 0,02312 |
| 20-24     | 0,76897                 | 0,18527   | 0,04576 | 0,78406                   | 0,16718   | 0,04876 |
| 25-29     | 0,63319                 | 0,28312   | 0,08368 | 0,64600                   | 0,25427   | 0,09973 |
| 30-34     | 0,50084                 | 0,38526   | 0,11390 | 0,51341                   | 0,33764   | 0,14896 |
| 35-39     | 0,46274                 | 0,39168   | 0,14558 | 0,47688                   | 0,35046   | 0,17266 |
| 40-44     | 0,45455                 | 0,40074   | 0,14471 | 0,41704                   | 0,38164   | 0,20133 |
| 45-49     | 0,42549                 | 0,39957   | 0,17495 | 0,32316                   | 0,42621   | 0,25064 |
| 50-54     | 0,46341                 | 0,35501   | 0,18157 | 0,33382                   | 0,38653   | 0,27965 |
| 55-59     | 0,45779                 | 0,37338   | 0,16883 | 0,33589                   | 0,38772   | 0,27639 |

**Table 2. Prevalent rates of lower socioeconomic status population by age group, gender, and body mass index category in 2005 (Caribe region)**

| Age Group | Nutritional State Males |           |         | Nutritional State Females |           |         |
|-----------|-------------------------|-----------|---------|---------------------------|-----------|---------|
|           | Not-Overweigh           | Overweigh | Obese   | Not-Overweigh             | Overweigh | Obese   |
| 0-4       | 0,76609                 | 0,20251   | 0,03140 | 0,83223                   | 0,14784   | 0,01993 |
| 5-9       | 0,90942                 | 0,06884   | 0,02174 | 0,90040                   | 0,08765   | 0,01195 |
| 10-14     | 0,92193                 | 0,06320   | 0,01487 | 0,90164                   | 0,08607   | 0,01230 |
| 15-19     | 0,95738                 | 0,04262   | 0,00000 | 0,86782                   | 0,10920   | 0,02299 |
| 20-24     | 0,83469                 | 0,13008   | 0,03523 | 0,78330                   | 0,17097   | 0,04573 |
| 25-29     | 0,70874                 | 0,24919   | 0,04207 | 0,65051                   | 0,25765   | 0,09184 |
| 30-34     | 0,63178                 | 0,29070   | 0,07752 | 0,55585                   | 0,30319   | 0,14096 |
| 35-39     | 0,57391                 | 0,34783   | 0,07826 | 0,48997                   | 0,33524   | 0,17479 |
| 40-44     | 0,58209                 | 0,32836   | 0,08955 | 0,48693                   | 0,34314   | 0,16993 |
| 45-49     | 0,57143                 | 0,32298   | 0,10559 | 0,36965                   | 0,40467   | 0,22568 |
| 50-54     | 0,58974                 | 0,29487   | 0,11538 | 0,44907                   | 0,33796   | 0,21296 |
| 55-59     | 0,62376                 | 0,24752   | 0,12871 | 0,48810                   | 0,30357   | 0,20833 |

**Table 3. Prevalent rates of middle socioeconomic status population by age group, gender, and body mass index category in 2005 (Caribe region)**

| Age Group | Nutritional State Males |           |         | Nutritional State Females |           |         |
|-----------|-------------------------|-----------|---------|---------------------------|-----------|---------|
|           | Not-Overweigh           | Overweigh | Obese   | Not-Overweigh             | Overweigh | Obese   |
| 0-4       | 0,72063                 | 0,22540   | 0,05397 | 0,77982                   | 0,17737   | 0,04281 |
| 5-9       | 0,86000                 | 0,09333   | 0,04667 | 0,82550                   | 0,10738   | 0,06711 |
| 10-14     | 0,87975                 | 0,08228   | 0,03797 | 0,86127                   | 0,13295   | 0,00578 |
| 15-19     | 0,88710                 | 0,05376   | 0,05914 | 0,84375                   | 0,12946   | 0,02679 |
| 20-24     | 0,79583                 | 0,17500   | 0,02917 | 0,79063                   | 0,16529   | 0,04408 |
| 25-29     | 0,63902                 | 0,27805   | 0,08293 | 0,62145                   | 0,25237   | 0,12618 |
| 30-34     | 0,44156                 | 0,44805   | 0,11039 | 0,51389                   | 0,35069   | 0,13542 |
| 35-39     | 0,43671                 | 0,37975   | 0,18354 | 0,48814                   | 0,34576   | 0,16610 |
| 40-44     | 0,45399                 | 0,39264   | 0,15337 | 0,37209                   | 0,43023   | 0,19767 |
| 45-49     | 0,39370                 | 0,37795   | 0,22835 | 0,31050                   | 0,45662   | 0,23288 |
| 50-54     | 0,49398                 | 0,31325   | 0,19277 | 0,33500                   | 0,39500   | 0,27000 |
| 55-59     | 0,45977                 | 0,39080   | 0,14943 | 0,30534                   | 0,38931   | 0,30534 |

**Table 4. Prevalent rates of higher socioeconomic status population by age group, gender, and body mass index category in 2005 (Caribe region)**

| Age Group | Nutritional State Males |           |         | Nutritional State Females |           |         |
|-----------|-------------------------|-----------|---------|---------------------------|-----------|---------|
|           | Not-Overweigh           | Overweigh | Obese   | Not-Overweigh             | Overweigh | Obese   |
| 0-4       | 0.73737                 | 0.17845   | 0.08418 | 0.76000                   | 0.18333   | 0.05667 |
| 5-9       | 0.65693                 | 0.20438   | 0.13869 | 0.77311                   | 0.19328   | 0.03361 |
| 10-14     | 0.77333                 | 0.16000   | 0.06667 | 0.77707                   | 0.17834   | 0.04459 |
| 15-19     | 0.83000                 | 0.14000   | 0.03000 | 0.84642                   | 0.13311   | 0.02048 |
| 20-24     | 0.66202                 | 0.26481   | 0.07317 | 0.77934                   | 0.16432   | 0.05634 |
| 25-29     | 0.51232                 | 0.33990   | 0.14778 | 0.66089                   | 0.25248   | 0.08663 |
| 30-34     | 0.36757                 | 0.46486   | 0.16757 | 0.46647                   | 0.36443   | 0.16910 |
| 35-39     | 0.34921                 | 0.45503   | 0.19577 | 0.45289                   | 0.37082   | 0.17629 |
| 40-44     | 0.30857                 | 0.49143   | 0.20000 | 0.38824                   | 0.37941   | 0.23235 |
| 45-49     | 0.31429                 | 0.48571   | 0.20000 | 0.29355                   | 0.42258   | 0.28387 |
| 50-54     | 0.29231                 | 0.45385   | 0.25385 | 0.23970                   | 0.41948   | 0.34082 |
| 55-59     | 0.31667                 | 0.46667   | 0.21667 | 0.23874                   | 0.45045   | 0.31081 |

**Table 5. Prevalent rates of entire population by age group, gender, and body mass index category in 2010 (Caribe region)**

| Age Group | Nutritional State Males |           |         | Nutritional State Females |           |         |
|-----------|-------------------------|-----------|---------|---------------------------|-----------|---------|
|           | Not-Overweigh           | Overweigh | Obese   | Not-Overweigh             | Overweigh | Obese   |
| 0-4       | 0.74984                 | 0.19572   | 0.05444 | 0.78199                   | 0.17084   | 0.04718 |
| 5-9       | 0.81667                 | 0.11923   | 0.06410 | 0.81776                   | 0.12989   | 0.05235 |
| 10-14     | 0.81581                 | 0.12345   | 0.06074 | 0.80601                   | 0.14958   | 0.04442 |
| 15-19     | 0.86134                 | 0.09872   | 0.03994 | 0.81877                   | 0.14296   | 0.03827 |
| 20-24     | 0.73229                 | 0.19167   | 0.07604 | 0.71296                   | 0.20463   | 0.08241 |
| 25-29     | 0.53554                 | 0.32108   | 0.14338 | 0.55194                   | 0.30804   | 0.14002 |
| 30-34     | 0.44954                 | 0.36566   | 0.18480 | 0.44521                   | 0.34834   | 0.20646 |
| 35-39     | 0.38959                 | 0.40788   | 0.20253 | 0.39918                   | 0.37769   | 0.22313 |
| 40-44     | 0.34884                 | 0.42151   | 0.22965 | 0.34736                   | 0.40215   | 0.25049 |
| 45-49     | 0.39465                 | 0.44969   | 0.15566 | 0.25573                   | 0.44725   | 0.29702 |
| 50-54     | 0.40234                 | 0.41016   | 0.18750 | 0.29475                   | 0.39569   | 0.30956 |
| 55-59     | 0.41422                 | 0.42402   | 0.16176 | 0.25291                   | 0.40266   | 0.34443 |

**Table 6. Prevalent rates of lower socioeconomic status population by age group, gender, and body mass index category in 2010 (Caribe region)**

| Age Group | Nutritional State Males |           |         | Nutritional State Females |           |         |
|-----------|-------------------------|-----------|---------|---------------------------|-----------|---------|
|           | Not-Overweigh           | Overweigh | Obese   | Not-Overweigh             | Overweigh | Obese   |
| 0-4       | 0.74797                 | 0.20209   | 0.04994 | 0.79267                   | 0.16941   | 0.03793 |
| 5-9       | 0.84961                 | 0.10213   | 0.04826 | 0.85615                   | 0.10325   | 0.04060 |
| 10-14     | 0.85993                 | 0.09501   | 0.04507 | 0.81165                   | 0.15242   | 0.03594 |
| 15-19     | 0.89886                 | 0.07407   | 0.02707 | 0.81686                   | 0.14680   | 0.03634 |
| 20-24     | 0.76459                 | 0.16298   | 0.07243 | 0.69811                   | 0.20755   | 0.09434 |
| 25-29     | 0.61330                 | 0.27586   | 0.11084 | 0.52495                   | 0.32163   | 0.15342 |
| 30-34     | 0.50505                 | 0.34848   | 0.14646 | 0.42520                   | 0.33858   | 0.23622 |
| 35-39     | 0.45580                 | 0.36464   | 0.17956 | 0.40889                   | 0.36889   | 0.22222 |



|       |         |         |         |         |         |         |
|-------|---------|---------|---------|---------|---------|---------|
| 40-44 | 0.37330 | 0.43324 | 0.19346 | 0.35700 | 0.38742 | 0.25558 |
| 45-49 | 0.43558 | 0.42331 | 0.14110 | 0.27569 | 0.40852 | 0.31579 |
| 50-54 | 0.48289 | 0.36502 | 0.15209 | 0.31686 | 0.38663 | 0.29651 |
| 55-59 | 0.51064 | 0.38298 | 0.10638 | 0.29412 | 0.38824 | 0.31765 |

**Table 7. Prevalent rates of middle socioeconomic status population by age group, gender, and body mass index category in 2010 (Caribe region)**

| Age Group | Nutritional State Males |           |         | Nutritional State Females |           |         |
|-----------|-------------------------|-----------|---------|---------------------------|-----------|---------|
|           | Not-Overweigh           | Overweigh | Obese   | Not-Overweigh             | Overweigh | Obese   |
| 0-4       | 0.80612                 | 0.15306   | 0.04082 | 0.80352                   | 0.14663   | 0.04985 |
| 5-9       | 0.81548                 | 0.13393   | 0.05060 | 0.85559                   | 0.11172   | 0.03270 |
| 10-14     | 0.81572                 | 0.15718   | 0.02710 | 0.83333                   | 0.13218   | 0.03448 |
| 15-19     | 0.86875                 | 0.10313   | 0.02813 | 0.84146                   | 0.10976   | 0.04878 |
| 20-24     | 0.76077                 | 0.17703   | 0.06220 | 0.72374                   | 0.21790   | 0.05837 |
| 25-29     | 0.57346                 | 0.27962   | 0.14692 | 0.60465                   | 0.29070   | 0.10465 |
| 30-34     | 0.48276                 | 0.33333   | 0.18391 | 0.45126                   | 0.37906   | 0.16968 |
| 35-39     | 0.34426                 | 0.43716   | 0.21858 | 0.42041                   | 0.33469   | 0.24490 |
| 40-44     | 0.36667                 | 0.39333   | 0.24000 | 0.35135                   | 0.40154   | 0.24710 |
| 45-49     | 0.41060                 | 0.45033   | 0.13907 | 0.21287                   | 0.47030   | 0.31683 |
| 50-54     | 0.45872                 | 0.38532   | 0.15596 | 0.36420                   | 0.35185   | 0.28395 |
| 55-59     | 0.43956                 | 0.41758   | 0.14286 | 0.27941                   | 0.34559   | 0.37500 |

**Table 8. Prevalent rates of higher socioeconomic status population by age group, gender, and body mass index category in 2010 (Caribe region)**

| Age Group | Nutritional State Males |           |         | Nutritional State Females |           |         |
|-----------|-------------------------|-----------|---------|---------------------------|-----------|---------|
|           | Not-Overweigh           | Overweigh | Obese   | Not-Overweigh             | Overweigh | Obese   |
| 0-4       | 0.67931                 | 0.23448   | 0.08621 | 0.72285                   | 0.20599   | 0.07116 |
| 5-9       | 0.72973                 | 0.15015   | 0.12012 | 0.65000                   | 0.23571   | 0.11429 |
| 10-14     | 0.70968                 | 0.15543   | 0.13490 | 0.76862                   | 0.15957   | 0.07181 |
| 15-19     | 0.76721                 | 0.15082   | 0.08197 | 0.80217                   | 0.16531   | 0.03252 |
| 20-24     | 0.64567                 | 0.25984   | 0.09449 | 0.73038                   | 0.18771   | 0.08191 |
| 25-29     | 0.33668                 | 0.45729   | 0.20603 | 0.55519                   | 0.29870   | 0.14610 |
| 30-34     | 0.30570                 | 0.43005   | 0.26425 | 0.48101                   | 0.33333   | 0.18565 |
| 35-39     | 0.29518                 | 0.46988   | 0.23494 | 0.36525                   | 0.42908   | 0.20567 |
| 40-44     | 0.28070                 | 0.42105   | 0.29825 | 0.32593                   | 0.42963   | 0.24444 |
| 45-49     | 0.29560                 | 0.50314   | 0.20126 | 0.25830                   | 0.48708   | 0.25461 |
| 50-54     | 0.20714                 | 0.51429   | 0.27857 | 0.21519                   | 0.43882   | 0.34599 |
| 55-59     | 0.25581                 | 0.48837   | 0.25581 | 0.18571                   | 0.45714   | 0.35714 |

**Table 9. Fraction of births for men by body mass index category, and socioeconomic status (Caribe region) †**

| Population group | Lower SES (%/year) | Middle SES (%/year) | Higher SES (%/year) | Complete Urban Population (%/year) |
|------------------|--------------------|---------------------|---------------------|------------------------------------|
| Not-overweight   | 84,96%             | 72,73%              | 75,86%              | 79,77%                             |
| Overweight       | 9,77%              | 18,18%              | 15,52%              | 13,23%                             |
| Obese            | 5,26%              | 9,09%               | 8,62%               | 7,00%                              |

† The fractions of births by each BMI category correspond to the prevalences by BMI category of children aged

0 to 12 months

**Table 10. Fraction of births for women by body mass index category and socioeconomic status (Caribe region) †**

| Population group | Lower SES (%/year) | Middle SES (%/year) | Higher SES (%/year) | Complete Urban Population (%/year) |
|------------------|--------------------|---------------------|---------------------|------------------------------------|
| Not- overweight  | 81,43%             | 75,68%              | 69,84%              | 77,26%                             |
| Overweight       | 17,86%             | 17,57%              | 22,22%              | 18,77%                             |
| Obese            | 0,71%              | 6,76%               | 7,94%               | 3,97%                              |

† The fractions of births by each BMI category correspond to the prevalences by BMI category of children aged 0 to 12 months

**Table 11. Mortality rates for men and population size by age group without segregate by socioeconomic status (Caribe region) †**

| Age group | Mortality rates (R) (%/year) | Not- overweight men in 2005 (Number of people) <sup>1</sup> | Overweight men in 2005 (Number of people) <sup>2</sup> | Obese men in 2005 (Number of people) <sup>3</sup> |
|-----------|------------------------------|-------------------------------------------------------------|--------------------------------------------------------|---------------------------------------------------|
| 0-4       | 0,00612                      | 269775                                                      | 73076                                                  | 17908                                             |
| 5-9       | 0,00046                      | 301926                                                      | 39186                                                  | 20557                                             |
| 10-14     | 0,00045                      | 310652                                                      | 33350                                                  | 12352                                             |
| 15-19     | 0,00161                      | 297832                                                      | 24381                                                  | 8127                                              |
| 20-24     | 0,00368                      | 218694                                                      | 52690                                                  | 13014                                             |
| 25-29     | 0,00423                      | 157427                                                      | 70391                                                  | 20805                                             |
| 30-34     | 0,00416                      | 108075                                                      | 83134                                                  | 24579                                             |
| 35-39     | 0,00403                      | 98567                                                       | 83431                                                  | 31010                                             |
| 40-44     | 0,00481                      | 90149                                                       | 79478                                                  | 28700                                             |
| 45-49     | 0,00574                      | 68289                                                       | 64129                                                  | 28078                                             |
| 50-54     | 0,00843                      | 58448                                                       | 44776                                                  | 22901                                             |
| 55-59     | 0,01214                      | 44561                                                       | 36344                                                  | 16434                                             |

†Values used in this table are for the urban population

<sup>1</sup> Initial value used in the stock of not-overweight population in 2005.

<sup>2</sup> Initial value used in the stock of overweight population in 2005.

<sup>3</sup> Initial value used in the stock of obese population in 2005.

**Table 12. Mortality rates for women and population size by age group without segregate by socioeconomic status (Caribe region) †**

| Age group | Mortality rates (R) (%/year) | Not- overweight men in 2005 (Number of people) <sup>1</sup> | Overweight men in 2005 (Number of people) <sup>2</sup> | Obese men in 2005 (Number of people) <sup>3</sup> |
|-----------|------------------------------|-------------------------------------------------------------|--------------------------------------------------------|---------------------------------------------------|
| 0-4       | 0,01083                      | 278590                                                      | 57190                                                  | 12174                                             |
| 5-9       | 0,00023                      | 297854                                                      | 41200                                                  | 11482                                             |
| 10-14     | 0,00022                      | 294633                                                      | 43205                                                  | 6601                                              |
| 15-19     | 0,00033                      | 281467                                                      | 40373                                                  | 7618                                              |
| 20-24     | 0,00048                      | 240108                                                      | 51198                                                  | 14933                                             |
| 25-29     | 0,00046                      | 175494                                                      | 69075                                                  | 27093                                             |
| 30-34     | 0,00060                      | 122749                                                      | 80725                                                  | 35614                                             |
| 35-39     | 0,00089                      | 114031                                                      | 83803                                                  | 41287                                             |
| 40-44     | 0,00113                      | 90818                                                       | 83110                                                  | 43843                                             |
| 45-49     | 0,00184                      | 57737                                                       | 76149                                                  | 44780                                             |
| 50-54     | 0,00239                      | 46299                                                       | 53610                                                  | 38786                                             |
| 55-59     | 0,00349                      | 36233                                                       | 41823                                                  | 29814                                             |

†Values used in this table are for the urban population

<sup>1</sup> Initial value used in the stock of not-overweight population in 2005.

<sup>2</sup> Initial value used in the stock of overweight population in 2005.

<sup>3</sup> Initial value used in the stock of obese population in 2005.

**Table 13. Man mortality rates and population size by age group for the lower socioeconomic status population (Caribe region) †**

| Age group | Mortality rates (R) (%/year) | Not- overweight men in 2005 (Number of people) <sup>1</sup> | Overweight men in 2005 (Number of people) <sup>2</sup> | Obese men in 2005 (Number of people) <sup>3</sup> |
|-----------|------------------------------|-------------------------------------------------------------|--------------------------------------------------------|---------------------------------------------------|
| 0-4       | 0,00612                      | 140953                                                      | 37260                                                  | 5777                                              |
| 5-9       | 0,00046                      | 161241                                                      | 12206                                                  | 3854                                              |
| 10-14     | 0,00045                      | 153164                                                      | 10499                                                  | 2470                                              |
| 15-19     | 0,00161                      | 139594                                                      | 6215                                                   | 0                                                 |
| 20-24     | 0,00368                      | 97762                                                       | 15236                                                  | 4126                                              |
| 25-29     | 0,00423                      | 75939                                                       | 26700                                                  | 4508                                              |
| 30-34     | 0,00416                      | 58917                                                       | 27109                                                  | 7229                                              |
| 35-39     | 0,00403                      | 48730                                                       | 29533                                                  | 6645                                              |
| 40-44     | 0,00481                      | 43051                                                       | 24285                                                  | 6623                                              |
| 45-49     | 0,00574                      | 31891                                                       | 18025                                                  | 5893                                              |
| 50-54     | 0,00843                      | 31446                                                       | 15723                                                  | 6152                                              |
| 55-59     | 0,01214                      | 19910                                                       | 7901                                                   | 4108                                              |

†Values used in this table are for the urban population

<sup>1</sup> Initial value used in the stock of not-overweight population in 2005 for lower SES.

<sup>2</sup> Initial value used in the stock of overweight population in 2005 for lower SES.

<sup>3</sup> Initial value used in the stock of obese population in 2005 for lower SES.

**Table 14. Women mortality rates and population size by age group for the lower socioeconomic status population (Caribe region) †**

| Age group | Mortality rates (R) (%/year) | Not- overweight women in 2005 (Number of people) <sup>1</sup> | Overweight women in 2005 (Number of people) <sup>2</sup> | Obese women in 2005 (Number of people) <sup>3</sup> |
|-----------|------------------------------|---------------------------------------------------------------|----------------------------------------------------------|-----------------------------------------------------|
| 0-4       | 0,01083                      | 147687                                                        | 26236                                                    | 3537                                                |
| 5-9       | 0,00023                      | 154728                                                        | 15062                                                    | 2054                                                |
| 10-14     | 0,00022                      | 144784                                                        | 13820                                                    | 1974                                                |
| 15-19     | 0,00033                      | 126197                                                        | 15879                                                    | 3343                                                |
| 20-24     | 0,00048                      | 98789                                                         | 21563                                                    | 5767                                                |
| 25-29     | 0,00046                      | 76159                                                         | 30165                                                    | 10752                                               |
| 30-34     | 0,00060                      | 57433                                                         | 31327                                                    | 14564                                               |
| 35-39     | 0,00089                      | 46702                                                         | 31954                                                    | 16660                                               |
| 40-44     | 0,00113                      | 39543                                                         | 27866                                                    | 13800                                               |
| 45-49     | 0,00184                      | 22966                                                         | 25141                                                    | 14021                                               |
| 50-54     | 0,00239                      | 26332                                                         | 19817                                                    | 12487                                               |
| 55-59     | 0,00349                      | 17265                                                         | 10738                                                    | 7369                                                |

†Values used in this table are for the urban population

<sup>1</sup> Initial value used in the stock of not-overweight population in 2005 for lower SES.

<sup>2</sup> Initial value used in the stock of overweight population in 2005 for lower SES.

<sup>3</sup> Initial value used in the stock of obese population in 2005 for lower SES.

**Table 15. Man mortality rates and population size by age group for the middle socioeconomic status population (Caribe region) †**

| Age group | Mortality rates (R) (%/year) | Not- overweight men in 2005 (Number of people) <sup>1</sup> | Overweight men in 2005 (Number of people) <sup>2</sup> | Obese men in 2005 (Number of people) <sup>3</sup> |
|-----------|------------------------------|-------------------------------------------------------------|--------------------------------------------------------|---------------------------------------------------|
| 0-4       | 0,00612                      | 65566                                                       | 20508                                                  | 4910                                              |
| 5-9       | 0,00046                      | 82869                                                       | 8994                                                   | 4497                                              |
| 10-14     | 0,00045                      | 85846                                                       | 8029                                                   | 3706                                              |

|       |         |       |       |       |
|-------|---------|-------|-------|-------|
| 15-19 | 0,00161 | 78880 | 4781  | 5259  |
| 20-24 | 0,00368 | 60625 | 13331 | 2222  |
| 25-29 | 0,00423 | 45425 | 19765 | 5895  |
| 30-34 | 0,00416 | 24579 | 24940 | 6145  |
| 35-39 | 0,00403 | 25472 | 22150 | 10706 |
| 40-44 | 0,00481 | 27229 | 23549 | 9199  |
| 45-49 | 0,00574 | 17332 | 16639 | 10053 |
| 50-54 | 0,00843 | 14014 | 8887  | 5469  |
| 55-59 | 0,01214 | 12641 | 10745 | 4108  |

†Values used in this table are for the urban population

1 Initial value used in the stock of not-overweight population in 2005 for middle SES.

2 Initial value used in the stock of overweight population in 2005 for middle SES.

3 Initial value used in the stock of obese population in 2005 for middle SES.

**Table 16. Women mortality rates and population size by age group for the middle socioeconomic status population (Caribe region) †**

| Age group | Mortality rates (R) (%/year) | Not- overweight women in 2005 (Number of people) <sup>1</sup> | Overweight women in 2005 (Number of people) <sup>2</sup> | Obese women in 2005 (Number of people) <sup>3</sup> |
|-----------|------------------------------|---------------------------------------------------------------|----------------------------------------------------------|-----------------------------------------------------|
| 0-4       | 0,01083                      | 68433                                                         | 15565                                                    | 3757                                                |
| 5-9       | 0,00023                      | 77096                                                         | 10029                                                    | 6268                                                |
| 10-14     | 0,00022                      | 81233                                                         | 12539                                                    | 545                                                 |
| 15-19     | 0,00033                      | 74825                                                         | 11481                                                    | 2375                                                |
| 20-24     | 0,00048                      | 64854                                                         | 13558                                                    | 3616                                                |
| 25-29     | 0,00046                      | 48269                                                         | 19602                                                    | 9801                                                |
| 30-34     | 0,00060                      | 31694                                                         | 21629                                                    | 8352                                                |
| 35-39     | 0,00089                      | 31962                                                         | 22640                                                    | 10876                                               |
| 40-44     | 0,00113                      | 24505                                                         | 28334                                                    | 13018                                               |
| 45-49     | 0,00184                      | 15217                                                         | 22378                                                    | 11413                                               |
| 50-54     | 0,00239                      | 10451                                                         | 12323                                                    | 8423                                                |
| 55-59     | 0,00349                      | 9304                                                          | 11862                                                    | 9304                                                |

†Values used in this table are for the urban population

1 Initial value used in the stock of not-overweight population in 2005 for middle SES.

2 Initial value used in the stock of overweight population in 2005 for middle SES.

3 Initial value used in the stock of obese population in 2005 for middle SES.

**Table 17. Man mortality rates and population size by age group for the higher socioeconomic status population (Caribe region) †**

| Age group | Mortality rates (R) (%/year) | Not- overweight men in 2005 (Number of people) <sup>1</sup> | Overweight men in 2005 (Number of people) <sup>2</sup> | Obese men in 2005 (Number of people) <sup>3</sup> |
|-----------|------------------------------|-------------------------------------------------------------|--------------------------------------------------------|---------------------------------------------------|
| 0-4       | 0,00612                      | 63256                                                       | 15308                                                  | 7221                                              |
| 5-9       | 0,00046                      | 57816                                                       | 17987                                                  | 12206                                             |
| 10-14     | 0,00045                      | 71641                                                       | 14822                                                  | 6176                                              |
| 15-19     | 0,00161                      | 79358                                                       | 13386                                                  | 2868                                              |
| 20-24     | 0,00368                      | 60308                                                       | 24123                                                  | 6666                                              |
| 25-29     | 0,00423                      | 36062                                                       | 23926                                                  | 10403                                             |
| 30-34     | 0,00416                      | 24579                                                       | 31085                                                  | 11205                                             |
| 35-39     | 0,00403                      | 24365                                                       | 31748                                                  | 13659                                             |
| 40-44     | 0,00481                      | 19869                                                       | 31644                                                  | 12878                                             |
| 45-49     | 0,00574                      | 19065                                                       | 29465                                                  | 12133                                             |
| 50-54     | 0,00843                      | 12988                                                       | 20166                                                  | 11279                                             |
| 55-59     | 0,01214                      | 12009                                                       | 17698                                                  | 8217                                              |

†Values used in this table are for the urban population

<sup>1</sup> Initial value used in the stock of not-overweight population in 2005 for higher SES.

<sup>2</sup> Initial value used in the stock of overweight population in 2005 for higher SES.

<sup>3</sup> Initial value used in the stock of obese population in 2005 for higher SES.

**Table 18. Women mortality rates and population size by age group for the higher socioeconomic status population (Caribe region) <sup>†</sup>**

| Age group | Mortality rates (R) (%/year) | Not- overweight women in 2005 (Number of people) <sup>1</sup> | Overweight women in 2005 (Number of people) <sup>2</sup> | Obese women in 2005 (Number of people) <sup>3</sup> |
|-----------|------------------------------|---------------------------------------------------------------|----------------------------------------------------------|-----------------------------------------------------|
| 0-4       | 0,01083                      | 62883                                                         | 15169                                                    | 4689                                                |
| 5-9       | 0,00023                      | 65946                                                         | 16486                                                    | 2867                                                |
| 10-14     | 0,00022                      | 69581                                                         | 15969                                                    | 3992                                                |
| 15-19     | 0,00033                      | 80711                                                         | 12693                                                    | 1953                                                |
| 20-24     | 0,00048                      | 76447                                                         | 16118                                                    | 5526                                                |
| 25-29     | 0,00046                      | 50832                                                         | 19419                                                    | 6663                                                |
| 30-34     | 0,00060                      | 34560                                                         | 27000                                                    | 12528                                               |
| 35-39     | 0,00089                      | 35473                                                         | 29045                                                    | 13808                                               |
| 40-44     | 0,00113                      | 27450                                                         | 26826                                                    | 16428                                               |
| 45-49     | 0,00184                      | 19823                                                         | 28537                                                    | 19170                                               |
| 50-54     | 0,00239                      | 11712                                                         | 20497                                                    | 16654                                               |
| 55-59     | 0,00349                      | 10034                                                         | 18931                                                    | 13063                                               |

<sup>†</sup>Values used in this table are for the urban population

<sup>1</sup> Initial value used in the stock of not-overweight population in 2005 for higher SES.

<sup>2</sup> Initial value used in the stock of overweight population in 2005 for higher SES.

<sup>3</sup> Initial value used in the stock of obese population in 2005 for higher SES.

**Table 19. Data and projections of the Fertility rates by department and Region (Caribe region) <sup>†</sup>**

| Year | Fecundity Rate Dept 08 | Fecundity Rate Dept 13 | Fecundity Rate Dept 20 | Fecundity Rate Dept 23 | Fecundity Rate Dept 44 | Fecundity Rate Dept 47 | Fecundity Rate Dept 70 | Fecundity Rate Dept 88 | Average Fecundity Rate |
|------|------------------------|------------------------|------------------------|------------------------|------------------------|------------------------|------------------------|------------------------|------------------------|
| 2005 | 2,4597                 | 2,9078                 | 3,2147                 | 3,1016                 | 4,0106                 | 3,2734                 | 2,9719                 | 2,3611                 | 3,038                  |
| 2006 | 2,4293                 | 2,8642                 | 3,1498                 | 3,0604                 | 3,9724                 | 3,2471                 | 2,9206                 | 2,3429                 | 2,998                  |
| 2007 | 2,3989                 | 2,8206                 | 3,0849                 | 3,0192                 | 3,9342                 | 3,2208                 | 2,8693                 | 2,3247                 | 2,959                  |
| 2008 | 2,3685                 | 2,777                  | 3,02                   | 2,978                  | 3,896                  | 3,1945                 | 2,818                  | 2,3065                 | 2,920                  |
| 2009 | 2,3467                 | 2,7432                 | 2,9725                 | 2,9384                 | 3,8417                 | 3,1575                 | 2,7801                 | 2,2935                 | 2,884                  |
| 2010 | 2,3249                 | 2,7094                 | 2,925                  | 2,8988                 | 3,7874                 | 3,1205                 | 2,7422                 | 2,2805                 | 2,849                  |
| 2011 | 2,3031                 | 2,6756                 | 2,8775                 | 2,8592                 | 3,7331                 | 3,0835                 | 2,7043                 | 2,2675                 | 2,813                  |
| 2012 | 2,2813                 | 2,6418                 | 2,83                   | 2,8196                 | 3,6788                 | 3,0465                 | 2,6664                 | 2,2545                 | 2,777                  |
| 2013 | 2,2595                 | 2,608                  | 2,7825                 | 2,78                   | 3,6245                 | 3,0095                 | 2,6285                 | 2,2415                 | 2,742                  |
| 2014 | 2,2456                 | 2,5863                 | 2,7528                 | 2,7494                 | 3,565                  | 2,9679                 | 2,6031                 | 2,2322                 | 2,713                  |
| 2015 | 2,2317                 | 2,5646                 | 2,7231                 | 2,7188                 | 3,5055                 | 2,9263                 | 2,5777                 | 2,2229                 | 2,684                  |
| 2016 | 2,2178                 | 2,5429                 | 2,6934                 | 2,6882                 | 3,446                  | 2,8847                 | 2,5523                 | 2,2136                 | 2,655                  |
| 2017 | 2,2039                 | 2,5212                 | 2,6637                 | 2,6576                 | 3,3865                 | 2,8431                 | 2,5269                 | 2,2043                 | 2,626                  |
| 2018 | 2,19                   | 2,4995                 | 2,634                  | 2,627                  | 3,327                  | 2,8015                 | 2,5015                 | 2,195                  | 2,597                  |
| 2019 | 2,1761                 | 2,4778                 | 2,6043                 | 2,5964                 | 3,2675                 | 2,7599                 | 2,4761                 | 2,1857                 | 2,568                  |
| 2020 | 2,1622                 | 2,4561                 | 2,5746                 | 2,5658                 | 3,208                  | 2,7183                 | 2,4507                 | 2,1764                 | 2,539                  |
| 2021 | 2,1483                 | 2,4344                 | 2,5449                 | 2,5352                 | 3,1485                 | 2,6767                 | 2,4253                 | 2,1671                 | 2,510                  |
| 2022 | 2,1344                 | 2,4127                 | 2,5152                 | 2,5046                 | 3,089                  | 2,6351                 | 2,3999                 | 2,1578                 | 2,481                  |
| 2023 | 2,1205                 | 2,391                  | 2,4855                 | 2,474                  | 3,0295                 | 2,5935                 | 2,3745                 | 2,1485                 | 2,452                  |

| Year | Fecundity Rate Dept 08 | Fecundity Rate Dept 13 | Fecundity Rate Dept 20 | Fecundity Rate Dept 23 | Fecundity Rate Dept 44 | Fecundity Rate Dept 47 | Fecundity Rate Dept 70 | Fecundity Rate Dept 88 | Average Fecundity Rate |
|------|------------------------|------------------------|------------------------|------------------------|------------------------|------------------------|------------------------|------------------------|------------------------|
| 2024 | 2,1066                 | 2,3693                 | 2,4558                 | 2,4434                 | 2,97                   | 2,5519                 | 2,3491                 | 2,1392                 | 2,423                  |
| 2025 | 2,0927                 | 2,3476                 | 2,4261                 | 2,4128                 | 2,9105                 | 2,5103                 | 2,3237                 | 2,1299                 | 2,394                  |
| 2026 | 2,0788                 | 2,3259                 | 2,3964                 | 2,3822                 | 2,851                  | 2,4687                 | 2,2983                 | 2,1206                 | 2,365                  |
| 2027 | 2,0649                 | 2,3042                 | 2,3667                 | 2,3516                 | 2,7915                 | 2,4271                 | 2,2729                 | 2,1113                 | 2,336                  |
| 2028 | 2,051                  | 2,2825                 | 2,337                  | 2,321                  | 2,732                  | 2,3855                 | 2,2475                 | 2,102                  | 2,307                  |
| 2029 | 2,0371                 | 2,2608                 | 2,3073                 | 2,2904                 | 2,6725                 | 2,3439                 | 2,2221                 | 2,0927                 | 2,278                  |
| 2030 | 2,0232                 | 2,2391                 | 2,2776                 | 2,2598                 | 2,613                  | 2,3023                 | 2,1967                 | 2,0834                 | 2,249                  |

† Data of Fertility rate of Colombian National Department of Statistics (DANE) [1] was used to forecast the department's fertility rate from 2005 to 2030. Holt-Winters no seasonal method in EVIEWS 5 (Quantitative Micro Software, LLC) was used to forecast the fertility rate. In the SD model we used data from 2005 to 2030 and the region fertility rate was calculated as the average of all departments' fertility rates.

**Table 20. Fraction of births by departments, body mass index category, and socioeconomic status†**

| Population group |                 | Lower SES (%/year) | Middle SES (%/year) | Higher SES (%/year) | Complete Urban Population (%/year) |
|------------------|-----------------|--------------------|---------------------|---------------------|------------------------------------|
| Department 08    | Not- overweight | 82,14%             | 73,68%              | 72,50%              | 76,87%                             |
|                  | Overweight      | 16,07%             | 18,42%              | 25,00%              | 19,40%                             |
|                  | Obese           | 1,79%              | 7,89%               | 2,50%               | 3,73%                              |
| Department 13    | Not- overweight | 84,00%             | 78,57%              | 70,59%              | 78,57%                             |
|                  | Overweight      | 12,00%             | 14,29%              | 11,76%              | 12,50%                             |
|                  | Obese           | 4,00%              | 7,14%               | 17,65%              | 8,93%                              |
| Department 20    | Not- overweight | 94,59%             | 79,17%              | 73,68%              | 85,00%                             |
|                  | Overweight      | 5,41%              | 20,83%              | 15,79%              | 12,50%                             |
|                  | Obese           | 0,00%              | 0,00%               | 10,53%              | 2,50%                              |
| Department 23    | Not- overweight | 75,00%             | 75,00%              | 55,56%              | 71,11%                             |
|                  | Overweight      | 25,00%             | 25,00%              | 22,22%              | 24,44%                             |
|                  | Obese           | 0,00%              | 0,00%               | 22,22%              | 4,44%                              |
| Department 44    | Not- overweight | 91,49%             | 69,23%              | 71,43%              | 81,61%                             |
|                  | Overweight      | 8,51%              | 23,08%              | 21,43%              | 14,94%                             |
|                  | Obese           | 0,00%              | 7,69%               | 7,14%               | 3,45%                              |
| Department 47    | Not- overweight | 76,47%             | 81,25%              | 90,00%              | 80,00%                             |
|                  | Overweight      | 14,71%             | 12,50%              | 10,00%              | 13,33%                             |
|                  | Obese           | 8,82%              | 6,25%               | 0,00%               | 6,67%                              |
| Department 70    | Not- overweight | 76,00%             | 64,29%              | 84,62%              | 75,32%                             |
|                  | Overweight      | 20,00%             | 14,29%              | 7,69%               | 16,88%                             |
|                  | Obese           | 4,00%              | 21,43%              | 7,69%               | 7,79%                              |
| Department 88    | Not- overweight | 60,00%             | 57,14%              | 60,00%              | 59,09%                             |
|                  | Overweight      | 30,00%             | 28,57%              | 40,00%              | 31,82%                             |
|                  | Obese           | 10,00%             | 14,29%              | 0,00%               | 9,09%                              |

† The fractions of births by each BMI category correspond to the prevalences by BMI category of children aged 0 to 12 months

**Table 21. Prevalent rates of entire population by age group, and body mass index category (Caribe region)**

| Departments  | Age group | Not- overweight in 2005 | Overweight in 2005 | Obese in 2005 | Not- overweight in 2010 | Overweight in 2010 | Obese in 2010 |
|--------------|-----------|-------------------------|--------------------|---------------|-------------------------|--------------------|---------------|
| Department 8 | 0-4       | 0.76748                 | 0.19187            | 0.04065       | 0.71498                 | 0.21824            | 0.06678       |
|              | 5-9       | 0.85308                 | 0.09005            | 0.05687       | 0.80705                 | 0.12584            | 0.06711       |
|              | 10-14     | 0.82573                 | 0.13278            | 0.04149       | 0.78130                 | 0.15693            | 0.06177       |
|              | 15-19     | 0.87772                 | 0.10326            | 0.01902       | 0.81031                 | 0.13260            | 0.05709       |

| Departments          | Age group | Not- overweight in 2005 | Overweight in 2005 | Obese in 2005 | Not- overweight in 2010 | Overweight in 2010 | Obese in 2010 |
|----------------------|-----------|-------------------------|--------------------|---------------|-------------------------|--------------------|---------------|
|                      | 20-24     | 0.78268                 | 0.16469            | 0.05263       | 0.74014                 | 0.20186            | 0.05800       |
|                      | 25-29     | 0.61024                 | 0.27394            | 0.11581       | 0.54717                 | 0.30728            | 0.14555       |
|                      | 30-34     | 0.52577                 | 0.32216            | 0.15206       | 0.43939                 | 0.32727            | 0.23333       |
|                      | 35-39     | 0.50535                 | 0.35027            | 0.14439       | 0.34824                 | 0.40575            | 0.24601       |
|                      | 40-44     | 0.42781                 | 0.37968            | 0.19251       | 0.33918                 | 0.40351            | 0.25731       |
|                      | 45-49     | 0.39308                 | 0.39623            | 0.21069       | 0.33550                 | 0.39739            | 0.26710       |
|                      | 50-54     | 0.37638                 | 0.36162            | 0.26199       | 0.36260                 | 0.40076            | 0.23664       |
|                      | 55-59     | 0.37879                 | 0.41919            | 0.20202       | 0.29126                 | 0.38835            | 0.32039       |
| <b>Department 13</b> | 0-4       | 0.81884                 | 0.14493            | 0.03623       | 0.73684                 | 0.21303            | 0.05013       |
|                      | 5-9       | 0.85821                 | 0.10448            | 0.03731       | 0.82339                 | 0.12615            | 0.05046       |
|                      | 10-14     | 0.84756                 | 0.10976            | 0.04268       | 0.80471                 | 0.15059            | 0.04471       |
|                      | 15-19     | 0.92593                 | 0.06349            | 0.01058       | 0.86768                 | 0.09415            | 0.03817       |
|                      | 20-24     | 0.84444                 | 0.10741            | 0.04815       | 0.75080                 | 0.16294            | 0.08626       |
|                      | 25-29     | 0.70936                 | 0.24631            | 0.04433       | 0.57143                 | 0.31579            | 0.11278       |
|                      | 30-34     | 0.53365                 | 0.33654            | 0.12981       | 0.42023                 | 0.40467            | 0.17510       |
|                      | 35-39     | 0.52083                 | 0.33854            | 0.14063       | 0.42373                 | 0.36441            | 0.21186       |
|                      | 40-44     | 0.49714                 | 0.34857            | 0.15429       | 0.34538                 | 0.40964            | 0.24498       |
|                      | 45-49     | 0.40341                 | 0.41477            | 0.18182       | 0.32105                 | 0.43158            | 0.24737       |
|                      | 50-54     | 0.48148                 | 0.29630            | 0.22222       | 0.36424                 | 0.36424            | 0.27152       |
|                      | 55-59     | 0.37615                 | 0.39450            | 0.22936       | 0.39860                 | 0.32168            | 0.27972       |
| <b>Department 20</b> | 0-4       | 0.82371                 | 0.16109            | 0.01520       | 0.81989                 | 0.13978            | 0.04032       |
|                      | 5-9       | 0.84138                 | 0.11724            | 0.04138       | 0.85286                 | 0.08719            | 0.05995       |
|                      | 10-14     | 0.92308                 | 0.04895            | 0.02797       | 0.82171                 | 0.13953            | 0.03876       |
|                      | 15-19     | 0.85586                 | 0.12613            | 0.01802       | 0.86869                 | 0.10438            | 0.02694       |
|                      | 20-24     | 0.77323                 | 0.18216            | 0.04461       | 0.71041                 | 0.21719            | 0.07240       |
|                      | 25-29     | 0.68085                 | 0.22128            | 0.09787       | 0.53744                 | 0.33480            | 0.12775       |
|                      | 30-34     | 0.51980                 | 0.37624            | 0.10396       | 0.42640                 | 0.39594            | 0.17766       |
|                      | 35-39     | 0.42157                 | 0.39216            | 0.18627       | 0.36898                 | 0.43850            | 0.19251       |
|                      | 40-44     | 0.44375                 | 0.39375            | 0.16250       | 0.35593                 | 0.37853            | 0.26554       |
|                      | 45-49     | 0.32432                 | 0.45270            | 0.22297       | 0.33553                 | 0.44079            | 0.22368       |
|                      | 50-54     | 0.42453                 | 0.34906            | 0.22642       | 0.25806                 | 0.49462            | 0.24731       |
|                      | 55-59     | 0.33333                 | 0.39583            | 0.27083       | 0.25843                 | 0.49438            | 0.24719       |
| <b>Department 23</b> | 0-4       | 0.81609                 | 0.15517            | 0.02874       | 0.76226                 | 0.17736            | 0.06038       |
|                      | 5-9       | 0.84259                 | 0.09259            | 0.06481       | 0.83667                 | 0.13000            | 0.03333       |
|                      | 10-14     | 0.90179                 | 0.08036            | 0.01786       | 0.85855                 | 0.11842            | 0.02303       |
|                      | 15-19     | 0.83007                 | 0.13725            | 0.03268       | 0.85430                 | 0.12252            | 0.02318       |
|                      | 20-24     | 0.80597                 | 0.15920            | 0.03483       | 0.72727                 | 0.20000            | 0.07273       |
|                      | 25-29     | 0.70073                 | 0.22628            | 0.07299       | 0.59574                 | 0.25000            | 0.15426       |
|                      | 30-34     | 0.57516                 | 0.33333            | 0.09150       | 0.48454                 | 0.34021            | 0.17526       |
|                      | 35-39     | 0.51471                 | 0.30882            | 0.17647       | 0.46465                 | 0.36364            | 0.17172       |
|                      | 40-44     | 0.43885                 | 0.39568            | 0.16547       | 0.39560                 | 0.40110            | 0.20330       |
|                      | 45-49     | 0.47059                 | 0.42157            | 0.10784       | 0.30573                 | 0.47134            | 0.22293       |
|                      | 50-54     | 0.32381                 | 0.46667            | 0.20952       | 0.35032                 | 0.34395            | 0.30573       |
|                      | 55-59     | 0.42500                 | 0.36250            | 0.21250       | 0.25000                 | 0.44167            | 0.30833       |
| <b>Department 44</b> | 0-4       | 0.69602                 | 0.24716            | 0.05682       | 0.80919                 | 0.16254            | 0.02827       |
|                      | 5-9       | 0.87283                 | 0.09827            | 0.02890       | 0.85030                 | 0.11976            | 0.02994       |

| Departments   | Age group | Not- overweight in 2005 | Overweight in 2005 | Obese in 2005 | Not- overweight in 2010 | Overweight in 2010 | Obese in 2010 |
|---------------|-----------|-------------------------|--------------------|---------------|-------------------------|--------------------|---------------|
|               | 10-14     | 0.81955                 | 0.16541            | 0.01504       | 0.87926                 | 0.09598            | 0.02477       |
|               | 15-19     | 0.90090                 | 0.07658            | 0.02252       | 0.85490                 | 0.11765            | 0.02745       |
|               | 20-24     | 0.68276                 | 0.25517            | 0.06207       | 0.68306                 | 0.24590            | 0.07104       |
|               | 25-29     | 0.63300                 | 0.27273            | 0.09428       | 0.49143                 | 0.32571            | 0.18286       |
|               | 30-34     | 0.46860                 | 0.38164            | 0.14976       | 0.41611                 | 0.28859            | 0.29530       |
|               | 35-39     | 0.43590                 | 0.39487            | 0.16923       | 0.29167                 | 0.41667            | 0.29167       |
|               | 40-44     | 0.38191                 | 0.42714            | 0.19095       | 0.39496                 | 0.43697            | 0.16807       |
|               | 45-49     | 0.31034                 | 0.41379            | 0.27586       | 0.32710                 | 0.44860            | 0.22430       |
|               | 50-54     | 0.30973                 | 0.42478            | 0.26549       | 0.33684                 | 0.37895            | 0.28421       |
|               | 55-59     | 0.36170                 | 0.36170            | 0.27660       | 0.31818                 | 0.45455            | 0.22727       |
| Department 47 | 0-4       | 0.76817                 | 0.17301            | 0.05882       | 0.80978                 | 0.15217            | 0.03804       |
|               | 5-9       | 0.83217                 | 0.11888            | 0.04895       | 0.83784                 | 0.10541            | 0.05676       |
|               | 10-14     | 0.90643                 | 0.08772            | 0.00585       | 0.82840                 | 0.13018            | 0.04142       |
|               | 15-19     | 0.88950                 | 0.08840            | 0.02210       | 0.83596                 | 0.14511            | 0.01893       |
|               | 20-24     | 0.80349                 | 0.16594            | 0.03057       | 0.72059                 | 0.18627            | 0.09314       |
|               | 25-29     | 0.59346                 | 0.29439            | 0.11215       | 0.64135                 | 0.24895            | 0.10970       |
|               | 30-34     | 0.47953                 | 0.38012            | 0.14035       | 0.51570                 | 0.32735            | 0.15695       |
|               | 35-39     | 0.45763                 | 0.37853            | 0.16384       | 0.48295                 | 0.32386            | 0.19318       |
|               | 40-44     | 0.45283                 | 0.36478            | 0.18239       | 0.32222                 | 0.35556            | 0.32222       |
|               | 45-49     | 0.30081                 | 0.46341            | 0.23577       | 0.35754                 | 0.48603            | 0.15642       |
| Department 70 | 50-54     | 0.41463                 | 0.34959            | 0.23577       | 0.33113                 | 0.47020            | 0.19868       |
|               | 55-59     | 0.41284                 | 0.31193            | 0.27523       | 0.40164                 | 0.40164            | 0.19672       |
|               | 0-4       | 0.79772                 | 0.15954            | 0.04274       | 0.78961                 | 0.17662            | 0.03377       |
|               | 5-9       | 0.83077                 | 0.14615            | 0.02308       | 0.86250                 | 0.10750            | 0.03000       |
|               | 10-14     | 0.89726                 | 0.08904            | 0.01370       | 0.84510                 | 0.10023            | 0.05467       |
|               | 15-19     | 0.88333                 | 0.08889            | 0.02778       | 0.88636                 | 0.10101            | 0.01263       |
|               | 20-24     | 0.78889                 | 0.17778            | 0.03333       | 0.80797                 | 0.13406            | 0.05797       |
|               | 25-29     | 0.66372                 | 0.28319            | 0.05310       | 0.54878                 | 0.32927            | 0.12195       |
|               | 30-34     | 0.50691                 | 0.36866            | 0.12442       | 0.48927                 | 0.38197            | 0.12876       |
|               | 35-39     | 0.45050                 | 0.40099            | 0.14851       | 0.43902                 | 0.40650            | 0.15447       |
| Department 88 | 40-44     | 0.42690                 | 0.42105            | 0.15205       | 0.39908                 | 0.43119            | 0.16972       |
|               | 45-49     | 0.32759                 | 0.37356            | 0.29885       | 0.31148                 | 0.46995            | 0.21858       |
|               | 50-54     | 0.34043                 | 0.43972            | 0.21986       | 0.38235                 | 0.37059            | 0.24706       |
|               | 55-59     | 0.43119                 | 0.34862            | 0.22018       | 0.40909                 | 0.36364            | 0.22727       |
|               | 0-4       | 0.65217                 | 0.26087            | 0.08696       | 0.70313                 | 0.20703            | 0.08984       |
|               | 5-9       | 0.65789                 | 0.23684            | 0.10526       | 0.62030                 | 0.22180            | 0.15789       |
|               | 10-14     | 0.68293                 | 0.24390            | 0.07317       | 0.64372                 | 0.20648            | 0.14980       |
|               | 15-19     | 0.65854                 | 0.21951            | 0.12195       | 0.69856                 | 0.17225            | 0.12919       |
|               | 20-24     | 0.68571                 | 0.21429            | 0.10000       | 0.55729                 | 0.28646            | 0.15625       |
|               | 25-29     | 0.49275                 | 0.31884            | 0.18841       | 0.40376                 | 0.39906            | 0.19718       |
| Department 88 | 30-34     | 0.32759                 | 0.41379            | 0.25862       | 0.37624                 | 0.36634            | 0.25743       |
|               | 35-39     | 0.41429                 | 0.34286            | 0.24286       | 0.32979                 | 0.39894            | 0.27128       |
|               | 40-44     | 0.33333                 | 0.37879            | 0.28788       | 0.27160                 | 0.45679            | 0.27160       |
|               | 45-49     | 0.31746                 | 0.46032            | 0.22222       | 0.23605                 | 0.47210            | 0.29185       |
|               | 50-54     | 0.32759                 | 0.31034            | 0.36207       | 0.27841                 | 0.42045            | 0.30114       |



| Departments | Age group | Not- overweight in 2005 | Overweight in 2005 | Obese in 2005 | Not- overweight in 2010 | Overweight in 2010 | Obese in 2010 |
|-------------|-----------|-------------------------|--------------------|---------------|-------------------------|--------------------|---------------|
|             | 55-59     | 0.23529                 | 0.52941            | 0.23529       | 0.20611                 | 0.49618            | 0.29771       |

**Table 22. Prevalent rates of lower socioeconomic status population by age group, and body mass index category (Caribe region)**

| Departments   | Age group | Not- overweight in 2005 | Overweight in 2005 | Obese in 2005 | Not- overweight in 2010 | Overweight in 2010 | Obese in 2010 |
|---------------|-----------|-------------------------|--------------------|---------------|-------------------------|--------------------|---------------|
| Department 8  | 0-4       | 0.76748                 | 0.19187            | 0.04065       | 0.74806                 | 0.20930            | 0.04264       |
|               | 5-9       | 0.85308                 | 0.09005            | 0.05687       | 0.87868                 | 0.08824            | 0.03309       |
|               | 10-14     | 0.82573                 | 0.13278            | 0.04149       | 0.84135                 | 0.12500            | 0.03365       |
|               | 15-19     | 0.87772                 | 0.10326            | 0.01902       | 0.89418                 | 0.07937            | 0.02646       |
|               | 20-24     | 0.78268                 | 0.16469            | 0.05263       | 0.77852                 | 0.16779            | 0.05369       |
|               | 25-29     | 0.61024                 | 0.27394            | 0.11581       | 0.58824                 | 0.29412            | 0.11765       |
|               | 30-34     | 0.52577                 | 0.32216            | 0.15206       | 0.48673                 | 0.28319            | 0.23009       |
|               | 35-39     | 0.50535                 | 0.35027            | 0.14439       | 0.41414                 | 0.39394            | 0.19192       |
|               | 40-44     | 0.42781                 | 0.37968            | 0.19251       | 0.41525                 | 0.33051            | 0.25424       |
|               | 45-49     | 0.39308                 | 0.39623            | 0.21069       | 0.44000                 | 0.34000            | 0.22000       |
|               | 50-54     | 0.37638                 | 0.36162            | 0.26199       | 0.48684                 | 0.31579            | 0.19737       |
| 55-59         | 0.37879   | 0.41919                 | 0.20202            | 0.38776       | 0.30612                 | 0.30612            |               |
| Department 13 | 0-4       | 0.86726                 | 0.11504            | 0.01770       | 0.74359                 | 0.20000            | 0.05641       |
|               | 5-9       | 0.85714                 | 0.11111            | 0.03175       | 0.87719                 | 0.08333            | 0.03947       |
|               | 10-14     | 0.88571                 | 0.08571            | 0.02857       | 0.83486                 | 0.14679            | 0.01835       |
|               | 15-19     | 0.96721                 | 0.01639            | 0.01639       | 0.88108                 | 0.09189            | 0.02703       |
|               | 20-24     | 0.79787                 | 0.12766            | 0.07447       | 0.77863                 | 0.15267            | 0.06870       |
|               | 25-29     | 0.74286                 | 0.20000            | 0.05714       | 0.62712                 | 0.27119            | 0.10169       |
|               | 30-34     | 0.59155                 | 0.28169            | 0.12676       | 0.34211                 | 0.50877            | 0.14912       |
|               | 35-39     | 0.57143                 | 0.34921            | 0.07937       | 0.50000                 | 0.29167            | 0.20833       |
|               | 40-44     | 0.57143                 | 0.28571            | 0.14286       | 0.36082                 | 0.35052            | 0.28866       |
|               | 45-49     | 0.50000                 | 0.38462            | 0.11538       | 0.38356                 | 0.36986            | 0.24658       |
|               | 50-54     | 0.71795                 | 0.25641            | 0.02564       | 0.34211                 | 0.34211            | 0.31579       |
| 55-59         | 0.58333   | 0.33333                 | 0.08333            | 0.48936       | 0.21277                 | 0.29787            |               |
| Department 20 | 0-4       | 0.87356                 | 0.12069            | 0.00575       | 0.83553                 | 0.14474            | 0.01974       |
|               | 5-9       | 0.89063                 | 0.09375            | 0.01563       | 0.92994                 | 0.05732            | 0.01274       |
|               | 10-14     | 0.95238                 | 0.03175            | 0.01587       | 0.83212                 | 0.14599            | 0.02190       |
|               | 15-19     | 0.86250                 | 0.11250            | 0.02500       | 0.89899                 | 0.08081            | 0.02020       |
|               | 20-24     | 0.78689                 | 0.16393            | 0.04918       | 0.80000                 | 0.15385            | 0.04615       |
|               | 25-29     | 0.69565                 | 0.20652            | 0.09783       | 0.50000                 | 0.34375            | 0.15625       |
|               | 30-34     | 0.63953                 | 0.25581            | 0.10465       | 0.51852                 | 0.29630            | 0.18519       |
|               | 35-39     | 0.48810                 | 0.36905            | 0.14286       | 0.49123                 | 0.33333            | 0.17544       |
|               | 40-44     | 0.56522                 | 0.34783            | 0.08696       | 0.39583                 | 0.43750            | 0.16667       |
|               | 45-49     | 0.36735                 | 0.53061            | 0.10204       | 0.36957                 | 0.41304            | 0.21739       |
|               | 50-54     | 0.55882                 | 0.35294            | 0.08824       | 0.47059                 | 0.47059            | 0.05882       |
| 55-59         | 0.58333   | 0.20833                 | 0.20833            | 0.33333       | 0.51852                 | 0.14815            |               |
| Department 23 | 0-4       | 0.83333                 | 0.14815            | 0.01852       | 0.75490                 | 0.19118            | 0.05392       |
|               | 5-9       | 0.85714                 | 0.10000            | 0.04286       | 0.85652                 | 0.11304            | 0.03043       |
|               | 10-14     | 0.95161                 | 0.03226            | 0.01613       | 0.87500                 | 0.10776            | 0.01724       |

| Departments   | Age group     | Not- overweight in 2005 | Overweight in 2005 | Obese in 2005 | Not- overweight in 2010 | Overweight in 2010 | Obese in 2010 |
|---------------|---------------|-------------------------|--------------------|---------------|-------------------------|--------------------|---------------|
|               | 15-19         | 0.88158                 | 0.11842            | 0.00000       | 0.87019                 | 0.10096            | 0.02885       |
|               | 20-24         | 0.83333                 | 0.13725            | 0.02941       | 0.75862                 | 0.17241            | 0.06897       |
|               | 25-29         | 0.71429                 | 0.25714            | 0.02857       | 0.60000                 | 0.26667            | 0.13333       |
|               | 30-34         | 0.56790                 | 0.33333            | 0.09877       | 0.50000                 | 0.32394            | 0.17606       |
|               | 35-39         | 0.58904                 | 0.24658            | 0.16438       | 0.46575                 | 0.36986            | 0.16438       |
|               | 40-44         | 0.46032                 | 0.28571            | 0.25397       | 0.38281                 | 0.39844            | 0.21875       |
|               | 45-49         | 0.54000                 | 0.36000            | 0.10000       | 0.37374                 | 0.40404            | 0.22222       |
|               | 50-54         | 0.44828                 | 0.36207            | 0.18966       | 0.39048                 | 0.36190            | 0.24762       |
|               | 55-59         | 0.61765                 | 0.29412            | 0.08824       | 0.35526                 | 0.44737            | 0.19737       |
| Department 44 | 0-4           | 0.72872                 | 0.22340            | 0.04787       | 0.80392                 | 0.18301            | 0.01307       |
|               | 5-9           | 0.93204                 | 0.06796            | 0.00000       | 0.90643                 | 0.08187            | 0.01170       |
|               | 10-14         | 0.82540                 | 0.17460            | 0.00000       | 0.91824                 | 0.08176            | 0.00000       |
|               | 15-19         | 0.88776                 | 0.09184            | 0.02041       | 0.89063                 | 0.09375            | 0.01563       |
|               | 20-24         | 0.74167                 | 0.20833            | 0.05000       | 0.69663                 | 0.23596            | 0.06742       |
|               | 25-29         | 0.66906                 | 0.25180            | 0.07914       | 0.52857                 | 0.28571            | 0.18571       |
|               | 30-34         | 0.54023                 | 0.27586            | 0.18391       | 0.39706                 | 0.32353            | 0.27941       |
|               | 35-39         | 0.40789                 | 0.43421            | 0.15789       | 0.29231                 | 0.38462            | 0.32308       |
|               | 40-44         | 0.50000                 | 0.41429            | 0.08571       | 0.41176                 | 0.49020            | 0.09804       |
|               | 45-49         | 0.45652                 | 0.26087            | 0.28261       | 0.43590                 | 0.30769            | 0.25641       |
|               | 50-54         | 0.43590                 | 0.35897            | 0.20513       | 0.39024                 | 0.41463            | 0.19512       |
|               | 55-59         | 0.54545                 | 0.24242            | 0.21212       | 0.42857                 | 0.42857            | 0.14286       |
|               | Department 47 | 0-4                     | 0.78344            | 0.17197       | 0.04459                 | 0.81304            | 0.15217       |
| 5-9           |               | 0.91892                 | 0.08108            | 0.00000       | 0.89593                 | 0.07692            | 0.02715       |
| 10-14         |               | 0.90588                 | 0.08235            | 0.01176       | 0.87500                 | 0.10500            | 0.02000       |
| 15-19         |               | 0.93617                 | 0.05319            | 0.01064       | 0.84884                 | 0.13372            | 0.01744       |
| 20-24         |               | 0.89423                 | 0.10577            | 0.00000       | 0.69298                 | 0.20175            | 0.10526       |
| 25-29         |               | 0.62791                 | 0.32558            | 0.04651       | 0.70161                 | 0.19355            | 0.10484       |
| 30-34         |               | 0.53165                 | 0.34177            | 0.12658       | 0.58955                 | 0.28358            | 0.12687       |
| 35-39         |               | 0.46479                 | 0.35211            | 0.18310       | 0.50000                 | 0.32955            | 0.17045       |
| 40-44         |               | 0.50000                 | 0.36538            | 0.13462       | 0.38372                 | 0.34884            | 0.26744       |
| 45-49         |               | 0.45098                 | 0.41176            | 0.13725       | 0.38554                 | 0.43373            | 0.18072       |
| 50-54         |               | 0.46667                 | 0.35000            | 0.18333       | 0.48387                 | 0.40323            | 0.11290       |
| 55-59         |               | 0.51163                 | 0.27907            | 0.20930       | 0.52941                 | 0.35294            | 0.11765       |
| Department 70 |               | 0-4                     | 0.79024            | 0.19024       | 0.01951                 | 0.76860            | 0.19835       |
|               | 5-9           | 0.92308                 | 0.06154            | 0.01538       | 0.89362                 | 0.07660            | 0.02979       |
|               | 10-14         | 0.96053                 | 0.03947            | 0.00000       | 0.87600                 | 0.08000            | 0.04400       |
|               | 15-19         | 0.89691                 | 0.08247            | 0.02062       | 0.89545                 | 0.10455            | 0.00000       |
|               | 20-24         | 0.78632                 | 0.15385            | 0.05983       | 0.82051                 | 0.11538            | 0.06410       |
|               | 25-29         | 0.73737                 | 0.24242            | 0.02020       | 0.61029                 | 0.30882            | 0.08088       |
|               | 30-34         | 0.52727                 | 0.39091            | 0.08182       | 0.48276                 | 0.36207            | 0.15517       |
|               | 35-39         | 0.50000                 | 0.39024            | 0.10976       | 0.46465                 | 0.39394            | 0.14141       |
|               | 40-44         | 0.50000                 | 0.40278            | 0.09722       | 0.43860                 | 0.43860            | 0.12281       |
|               | 45-49         | 0.36709                 | 0.43038            | 0.20253       | 0.37500                 | 0.43182            | 0.19318       |
|               | 50-54         | 0.41176                 | 0.37255            | 0.21569       | 0.40789                 | 0.38158            | 0.21053       |
|               | 55-59         | 0.50000                 | 0.28261            | 0.21739       | 0.53448                 | 0.25862            | 0.20690       |

| Departments   | Age group | Not- overweight in 2005 | Overweight in 2005 | Obese in 2005 | Not- overweight in 2010 | Overweight in 2010 | Obese in 2010 |
|---------------|-----------|-------------------------|--------------------|---------------|-------------------------|--------------------|---------------|
| Department 88 | 0-4       | 0.69697                 | 0.27273            | 0.03030       | 0.71560                 | 0.19725            | 0.08716       |
|               | 5-9       | 0.88235                 | 0.05882            | 0.05882       | 0.62762                 | 0.22176            | 0.15063       |
|               | 10-14     | 0.76471                 | 0.17647            | 0.05882       | 0.65625                 | 0.19643            | 0.14732       |
|               | 15-19     | 0.73333                 | 0.26667            | 0.00000       | 0.70899                 | 0.17989            | 0.11111       |
|               | 20-24     | 0.69231                 | 0.23077            | 0.07692       | 0.56742                 | 0.27528            | 0.15730       |
|               | 25-29     | 0.78947                 | 0.15789            | 0.05263       | 0.37989                 | 0.41341            | 0.20670       |
|               | 30-34     | 0.61538                 | 0.23077            | 0.15385       | 0.37423                 | 0.34356            | 0.28221       |
|               | 35-39     | 0.61111                 | 0.22222            | 0.16667       | 0.33951                 | 0.40123            | 0.25926       |
|               | 40-44     | 0.29412                 | 0.35294            | 0.35294       | 0.26147                 | 0.45872            | 0.27982       |
|               | 45-49     | 0.44444                 | 0.27778            | 0.27778       | 0.22335                 | 0.48223            | 0.29442       |
|               | 50-54     | 0.50000                 | 0.10000            | 0.40000       | 0.30519                 | 0.40260            | 0.29221       |
| 55-59         | 0.33333   | 0.50000                 | 0.16667            | 0.21495       | 0.49533                 | 0.28972            |               |

**Table 23. Prevalent rates of middle socioeconomic status population by age group, and body mass index category (Caribe region)**

| Departments   | Age group | Not- overweight in 2005 | Overweight in 2005 | Obese in 2005 | Not- overweight in 2010 | Overweight in 2010 | Obese in 2010 |
|---------------|-----------|-------------------------|--------------------|---------------|-------------------------|--------------------|---------------|
| Department 8  | 0-4       | 0.78824                 | 0.17059            | 0.04118       | 0.75723                 | 0.17919            | 0.06358       |
|               | 5-9       | 0.89655                 | 0.08621            | 0.01724       | 0.80986                 | 0.13380            | 0.05634       |
|               | 10-14     | 0.89041                 | 0.08219            | 0.02740       | 0.76774                 | 0.19355            | 0.03871       |
|               | 15-19     | 0.86813                 | 0.12088            | 0.01099       | 0.76978                 | 0.14388            | 0.08633       |
|               | 20-24     | 0.81065                 | 0.12426            | 0.06509       | 0.73034                 | 0.22472            | 0.04494       |
|               | 25-29     | 0.63830                 | 0.24823            | 0.11348       | 0.57143                 | 0.27473            | 0.15385       |
|               | 30-34     | 0.53846                 | 0.36538            | 0.09615       | 0.46392                 | 0.31959            | 0.21649       |
|               | 35-39     | 0.56075                 | 0.30841            | 0.13084       | 0.29487                 | 0.39744            | 0.30769       |
|               | 40-44     | 0.35238                 | 0.45714            | 0.19048       | 0.27632                 | 0.51316            | 0.21053       |
|               | 45-49     | 0.37374                 | 0.45455            | 0.17172       | 0.28767                 | 0.39726            | 0.31507       |
|               | 50-54     | 0.37143                 | 0.37143            | 0.25714       | 0.45455                 | 0.39394            | 0.15152       |
| 55-59         | 0.54000   | 0.32000                 | 0.14000            | 0.41176       | 0.35294                 | 0.23529            |               |
| Department 13 | 0-4       | 0.80000                 | 0.18667            | 0.01333       | 0.77320                 | 0.19588            | 0.03093       |
|               | 5-9       | 0.90000                 | 0.06667            | 0.03333       | 0.80851                 | 0.17021            | 0.02128       |
|               | 10-14     | 0.87500                 | 0.09375            | 0.03125       | 0.75904                 | 0.21687            | 0.02410       |
|               | 15-19     | 1.00000                 | 0.00000            | 0.00000       | 0.88235                 | 0.09412            | 0.02353       |
|               | 20-24     | 0.84211                 | 0.12281            | 0.03509       | 0.74603                 | 0.15873            | 0.09524       |
|               | 25-29     | 0.72340                 | 0.25532            | 0.02128       | 0.58182                 | 0.30909            | 0.10909       |
|               | 30-34     | 0.42857                 | 0.44898            | 0.12245       | 0.51724                 | 0.29310            | 0.18966       |
|               | 35-39     | 0.49020                 | 0.29412            | 0.21569       | 0.34426                 | 0.44262            | 0.21311       |
|               | 40-44     | 0.55556                 | 0.25000            | 0.19444       | 0.37288                 | 0.42373            | 0.20339       |
|               | 45-49     | 0.48148                 | 0.44444            | 0.07407       | 0.32353                 | 0.44118            | 0.23529       |
|               | 50-54     | 0.40741                 | 0.29630            | 0.29630       | 0.62069                 | 0.20690            | 0.17241       |
| 55-59         | 0.25000   | 0.50000                 | 0.25000            | 0.40000       | 0.36667                 | 0.23333            |               |
| Department 20 | 0-4       | 0.76667                 | 0.22222            | 0.01111       | 0.81169                 | 0.14286            | 0.04545       |
|               | 5-9       | 0.81818                 | 0.12727            | 0.05455       | 0.86364                 | 0.07576            | 0.06061       |
|               | 10-14     | 0.90566                 | 0.07547            | 0.01887       | 0.85616                 | 0.10274            | 0.04110       |
|               | 15-19     | 0.84211                 | 0.14474            | 0.01316       | 0.86923                 | 0.10769            | 0.02308       |
|               | 20-24     | 0.77333                 | 0.18667            | 0.04000       | 0.70330                 | 0.23077            | 0.06593       |

| Departments          | Age group | Not- overweight in 2005 | Overweight in 2005 | Obese in 2005 | Not- overweight in 2010 | Overweight in 2010 | Obese in 2010 |
|----------------------|-----------|-------------------------|--------------------|---------------|-------------------------|--------------------|---------------|
|                      | 25-29     | 0.66234                 | 0.24675            | 0.09091       | 0.61053                 | 0.28421            | 0.10526       |
|                      | 30-34     | 0.42373                 | 0.45763            | 0.11864       | 0.44048                 | 0.42857            | 0.13095       |
|                      | 35-39     | 0.44776                 | 0.37313            | 0.17910       | 0.36000                 | 0.41333            | 0.22667       |
|                      | 40-44     | 0.43636                 | 0.38182            | 0.18182       | 0.33333                 | 0.35556            | 0.31111       |
|                      | 45-49     | 0.32692                 | 0.42308            | 0.25000       | 0.33929                 | 0.42857            | 0.23214       |
|                      | 50-54     | 0.43590                 | 0.38462            | 0.17949       | 0.24242                 | 0.54545            | 0.21212       |
|                      | 55-59     | 0.32500                 | 0.40000            | 0.27500       | 0.22727                 | 0.45455            | 0.31818       |
| <b>Department 23</b> | 0-4       | 0.81579                 | 0.15789            | 0.02632       | 0.75000                 | 0.18750            | 0.06250       |
|                      | 5-9       | 0.80000                 | 0.08000            | 0.12000       | 0.85714                 | 0.11429            | 0.02857       |
|                      | 10-14     | 0.83871                 | 0.12903            | 0.03226       | 0.85000                 | 0.10000            | 0.05000       |
|                      | 15-19     | 0.77143                 | 0.11429            | 0.11429       | 0.89362                 | 0.08511            | 0.02128       |
|                      | 20-24     | 0.80952                 | 0.19048            | 0.00000       | 0.71429                 | 0.20000            | 0.08571       |
|                      | 25-29     | 0.67568                 | 0.16216            | 0.16216       | 0.75000                 | 0.08333            | 0.16667       |
|                      | 30-34     | 0.64865                 | 0.27027            | 0.08108       | 0.41667                 | 0.37500            | 0.20833       |
|                      | 35-39     | 0.51613                 | 0.38710            | 0.09677       | 0.52000                 | 0.36000            | 0.12000       |
|                      | 40-44     | 0.35714                 | 0.50000            | 0.14286       | 0.43333                 | 0.40000            | 0.16667       |
|                      | 45-49     | 0.42105                 | 0.47368            | 0.10526       | 0.21739                 | 0.52174            | 0.26087       |
|                      | 50-54     | 0.33333                 | 0.46667            | 0.20000       | 0.45833                 | 0.25000            | 0.29167       |
|                      | 55-59     | 0.25000                 | 0.50000            | 0.25000       | 0.05556                 | 0.38889            | 0.55556       |
| <b>Department 44</b> | 0-4       | 0.67677                 | 0.27273            | 0.05051       | 0.87952                 | 0.07229            | 0.04819       |
|                      | 5-9       | 0.88372                 | 0.06977            | 0.04651       | 0.85047                 | 0.13084            | 0.01869       |
|                      | 10-14     | 0.88235                 | 0.11765            | 0.00000       | 0.87619                 | 0.10476            | 0.01905       |
|                      | 15-19     | 0.91781                 | 0.04110            | 0.04110       | 0.83784                 | 0.12162            | 0.04054       |
|                      | 20-24     | 0.70588                 | 0.25490            | 0.03922       | 0.70968                 | 0.20968            | 0.08065       |
|                      | 25-29     | 0.61628                 | 0.25581            | 0.12791       | 0.51667                 | 0.35000            | 0.13333       |
|                      | 30-34     | 0.50000                 | 0.39394            | 0.10606       | 0.46000                 | 0.26000            | 0.28000       |
|                      | 35-39     | 0.40580                 | 0.40580            | 0.18841       | 0.33962                 | 0.37736            | 0.28302       |
|                      | 40-44     | 0.37705                 | 0.42623            | 0.19672       | 0.34884                 | 0.44186            | 0.20930       |
|                      | 45-49     | 0.25490                 | 0.41176            | 0.33333       | 0.27907                 | 0.48837            | 0.23256       |
|                      | 50-54     | 0.28205                 | 0.48718            | 0.23077       | 0.42308                 | 0.19231            | 0.38462       |
|                      | 55-59     | 0.34375                 | 0.40625            | 0.25000       | 0.35294                 | 0.35294            | 0.29412       |
| <b>Department 47</b> | 0-4       | 0.74359                 | 0.16667            | 0.08974       | 0.87640                 | 0.11236            | 0.01124       |
|                      | 5-9       | 0.81395                 | 0.09302            | 0.09302       | 0.86517                 | 0.12360            | 0.01124       |
|                      | 10-14     | 0.91667                 | 0.08333            | 0.00000       | 0.86486                 | 0.12162            | 0.01351       |
|                      | 15-19     | 0.81818                 | 0.13636            | 0.04545       | 0.87952                 | 0.12048            | 0.00000       |
|                      | 20-24     | 0.76667                 | 0.21667            | 0.01667       | 0.81132                 | 0.15094            | 0.03774       |
|                      | 25-29     | 0.58000                 | 0.24000            | 0.18000       | 0.63636                 | 0.30303            | 0.06061       |
|                      | 30-34     | 0.45098                 | 0.45098            | 0.09804       | 0.47170                 | 0.33962            | 0.18868       |
|                      | 35-39     | 0.40816                 | 0.38776            | 0.20408       | 0.53333                 | 0.26667            | 0.20000       |
|                      | 40-44     | 0.43860                 | 0.38596            | 0.17544       | 0.34694                 | 0.30612            | 0.34694       |
|                      | 45-49     | 0.26667                 | 0.50000            | 0.23333       | 0.30189                 | 0.58491            | 0.11321       |
|                      | 50-54     | 0.38889                 | 0.27778            | 0.33333       | 0.28261                 | 0.45652            | 0.26087       |
|                      | 55-59     | 0.33333                 | 0.33333            | 0.33333       | 0.37500                 | 0.42500            | 0.20000       |
| <b>Department 70</b> | 0-4       | 0.78689                 | 0.14754            | 0.06557       | 0.83544                 | 0.12658            | 0.03797       |
|                      | 5-9       | 0.82857                 | 0.14286            | 0.02857       | 0.87805                 | 0.09756            | 0.02439       |

| Departments   | Age group | Not- overweight in 2005 | Overweight in 2005 | Obese in 2005 | Not- overweight in 2010 | Overweight in 2010 | Obese in 2010 |
|---------------|-----------|-------------------------|--------------------|---------------|-------------------------|--------------------|---------------|
|               | 10-14     | 0.85714                 | 0.14286            | 0.00000       | 0.87629                 | 0.12371            | 0.00000       |
|               | 15-19     | 0.87179                 | 0.07692            | 0.05128       | 0.93421                 | 0.05263            | 0.01316       |
|               | 20-24     | 0.88000                 | 0.12000            | 0.00000       | 0.81538                 | 0.15385            | 0.03077       |
|               | 25-29     | 0.65517                 | 0.29310            | 0.05172       | 0.57407                 | 0.25926            | 0.16667       |
|               | 30-34     | 0.48148                 | 0.27778            | 0.24074       | 0.47458                 | 0.45763            | 0.06780       |
|               | 35-39     | 0.47059                 | 0.41176            | 0.11765       | 0.47222                 | 0.34722            | 0.18056       |
|               | 40-44     | 0.40000                 | 0.45000            | 0.15000       | 0.48889                 | 0.31111            | 0.20000       |
|               | 45-49     | 0.38776                 | 0.28571            | 0.32653       | 0.28261                 | 0.47826            | 0.23913       |
|               | 50-54     | 0.45652                 | 0.36957            | 0.17391       | 0.50000                 | 0.29412            | 0.20588       |
|               | 55-59     | 0.55556                 | 0.16667            | 0.27778       | 0.45161                 | 0.29032            | 0.25806       |
| Department 88 | 0-4       | 0.48387                 | 0.35484            | 0.16129       | 0.69231                 | 0.23077            | 0.07692       |
|               | 5-9       | 0.60000                 | 0.20000            | 0.20000       | 0.59091                 | 0.18182            | 0.22727       |
|               | 10-14     | 0.46154                 | 0.38462            | 0.15385       | 0.52941                 | 0.29412            | 0.17647       |
|               | 15-19     | 0.58333                 | 0.08333            | 0.33333       | 0.78571                 | 0.00000            | 0.21429       |
|               | 20-24     | 0.73913                 | 0.17391            | 0.08696       | 0.50000                 | 0.50000            | 0.00000       |
|               | 25-29     | 0.30769                 | 0.53846            | 0.15385       | 0.54167                 | 0.33333            | 0.12500       |
|               | 30-34     | 0.36364                 | 0.40909            | 0.22727       | 0.42308                 | 0.46154            | 0.11538       |
|               | 35-39     | 0.35714                 | 0.32143            | 0.32143       | 0.31579                 | 0.36842            | 0.31579       |
|               | 40-44     | 0.40000                 | 0.40000            | 0.20000       | 0.35294                 | 0.41176            | 0.23529       |
|               | 45-49     | 0.15789                 | 0.52632            | 0.31579       | 0.32000                 | 0.36000            | 0.32000       |
|               | 50-54     | 0.34483                 | 0.27586            | 0.37931       | 0.07692                 | 0.53846            | 0.38462       |
|               | 55-59     | 0.00000                 | 0.72727            | 0.27273       | 0.22222                 | 0.38889            | 0.38889       |

**Table 24. Prevalent rates of higher socioeconomic status population by age group, and body mass index category (Caribe region)**

| Departments   | Age group | Not- overweight in 2005 | Overweight in 2005 | Obese in 2005 | Not- overweight in 2010 | Overweight in 2010 | Obese in 2010 |
|---------------|-----------|-------------------------|--------------------|---------------|-------------------------|--------------------|---------------|
| Department 8  | 0-4       | 0.72826                 | 0.20652            | 0.06522       | 0.62842                 | 0.26776            | 0.10383       |
|               | 5-9       | 0.74390                 | 0.13415            | 0.12195       | 0.69780                 | 0.17582            | 0.12637       |
|               | 10-14     | 0.68132                 | 0.24176            | 0.07692       | 0.73729                 | 0.16102            | 0.10169       |
|               | 15-19     | 0.81379                 | 0.14483            | 0.04138       | 0.76279                 | 0.17209            | 0.06512       |
|               | 20-24     | 0.72961                 | 0.20601            | 0.06438       | 0.71503                 | 0.21762            | 0.06736       |
|               | 25-29     | 0.60989                 | 0.28022            | 0.10989       | 0.49306                 | 0.34028            | 0.16667       |
|               | 30-34     | 0.41808                 | 0.36158            | 0.22034       | 0.37500                 | 0.37500            | 0.25000       |
|               | 35-39     | 0.40000                 | 0.42581            | 0.17419       | 0.33088                 | 0.41912            | 0.25000       |
|               | 40-44     | 0.35526                 | 0.39474            | 0.25000       | 0.31081                 | 0.40541            | 0.28378       |
|               | 45-49     | 0.36301                 | 0.41781            | 0.21918       | 0.28358                 | 0.44030            | 0.27612       |
|               | 50-54     | 0.25833                 | 0.42500            | 0.31667       | 0.23333                 | 0.45833            | 0.30833       |
|               | 55-59     | 0.23762                 | 0.53465            | 0.22772       | 0.18868                 | 0.44340            | 0.36792       |
| Department 13 | 0-4       | 0.77273                 | 0.14773            | 0.07955       | 0.69159                 | 0.25234            | 0.05607       |
|               | 5-9       | 0.82927                 | 0.12195            | 0.04878       | 0.72807                 | 0.17544            | 0.09649       |
|               | 10-14     | 0.79032                 | 0.14516            | 0.06452       | 0.78226                 | 0.11290            | 0.10484       |
|               | 15-19     | 0.86364                 | 0.12500            | 0.01136       | 0.83740                 | 0.09756            | 0.06504       |
|               | 20-24     | 0.88235                 | 0.08403            | 0.03361       | 0.72269                 | 0.17647            | 0.10084       |

| Departments          | Age group | Not- overweight in 2005 | Overweight in 2005 | Obese in 2005 | Not- overweight in 2010 | Overweight in 2010 | Obese in 2010 |
|----------------------|-----------|-------------------------|--------------------|---------------|-------------------------|--------------------|---------------|
|                      | 25-29     | 0.67442                 | 0.27907            | 0.04651       | 0.49462                 | 0.37634            | 0.12903       |
|                      | 30-34     | 0.54545                 | 0.31818            | 0.13636       | 0.45882                 | 0.34118            | 0.20000       |
|                      | 35-39     | 0.50000                 | 0.35897            | 0.14103       | 0.39241                 | 0.39241            | 0.21519       |
|                      | 40-44     | 0.39130                 | 0.46377            | 0.14493       | 0.31183                 | 0.46237            | 0.22581       |
|                      | 45-49     | 0.32990                 | 0.42268            | 0.24742       | 0.26506                 | 0.48193            | 0.25301       |
|                      | 50-54     | 0.37681                 | 0.31884            | 0.30435       | 0.23913                 | 0.50000            | 0.26087       |
|                      | 55-59     | 0.28302                 | 0.39623            | 0.32075       | 0.33333                 | 0.37879            | 0.28788       |
| <b>Department 20</b> | 0-4       | 0.76923                 | 0.18462            | 0.04615       | 0.80303                 | 0.12121            | 0.07576       |
|                      | 5-9       | 0.76923                 | 0.15385            | 0.07692       | 0.67949                 | 0.16667            | 0.15385       |
|                      | 10-14     | 0.88889                 | 0.03704            | 0.07407       | 0.75962                 | 0.18269            | 0.05769       |
|                      | 15-19     | 0.86364                 | 0.12121            | 0.01515       | 0.82353                 | 0.13235            | 0.04412       |
|                      | 20-24     | 0.75000                 | 0.20833            | 0.04167       | 0.63077                 | 0.26154            | 0.10769       |
|                      | 25-29     | 0.68182                 | 0.21212            | 0.10606       | 0.47059                 | 0.39706            | 0.13235       |
|                      | 30-34     | 0.43860                 | 0.47368            | 0.08772       | 0.32203                 | 0.44068            | 0.23729       |
|                      | 35-39     | 0.28302                 | 0.45283            | 0.26415       | 0.25455                 | 0.58182            | 0.16364       |
|                      | 40-44     | 0.35593                 | 0.44068            | 0.20339       | 0.35897                 | 0.35897            | 0.28205       |
|                      | 45-49     | 0.27660                 | 0.40426            | 0.31915       | 0.30000                 | 0.48000            | 0.22000       |
|                      | 50-54     | 0.27273                 | 0.30303            | 0.42424       | 0.18605                 | 0.46512            | 0.34884       |
|                      | 55-59     | 0.15625                 | 0.53125            | 0.31250       | 0.22500                 | 0.50000            | 0.27500       |
| <b>Department 23</b> | 0-4       | 0.75000                 | 0.17857            | 0.07143       | 0.82759                 | 0.06897            | 0.10345       |
|                      | 5-9       | 0.84615                 | 0.07692            | 0.07692       | 0.68571                 | 0.25714            | 0.05714       |
|                      | 10-14     | 0.84211                 | 0.15789            | 0.00000       | 0.75000                 | 0.21875            | 0.03125       |
|                      | 15-19     | 0.78571                 | 0.19048            | 0.02381       | 0.74468                 | 0.25532            | 0.00000       |
|                      | 20-24     | 0.75439                 | 0.17544            | 0.07018       | 0.62500                 | 0.30000            | 0.07500       |
|                      | 25-29     | 0.70000                 | 0.23333            | 0.06667       | 0.50000                 | 0.29545            | 0.20455       |
|                      | 30-34     | 0.51429                 | 0.40000            | 0.08571       | 0.46429                 | 0.39286            | 0.14286       |
|                      | 35-39     | 0.34375                 | 0.37500            | 0.28125       | 0.40741                 | 0.33333            | 0.25926       |
|                      | 40-44     | 0.50000                 | 0.47059            | 0.02941       | 0.41667                 | 0.41667            | 0.16667       |
|                      | 45-49     | 0.39394                 | 0.48485            | 0.12121       | 0.17143                 | 0.62857            | 0.20000       |
|                      | 50-54     | 0.09375                 | 0.65625            | 0.25000       | 0.10714                 | 0.35714            | 0.53571       |
|                      | 55-59     | 0.30769                 | 0.34615            | 0.34615       | 0.07692                 | 0.46154            | 0.46154       |
| <b>Department 44</b> | 0-4       | 0.63077                 | 0.27692            | 0.09231       | 0.70213                 | 0.25532            | 0.04255       |
|                      | 5-9       | 0.62963                 | 0.25926            | 0.11111       | 0.67857                 | 0.21429            | 0.10714       |
|                      | 10-14     | 0.75000                 | 0.19444            | 0.05556       | 0.77966                 | 0.11864            | 0.10169       |
|                      | 15-19     | 0.90196                 | 0.09804            | 0.00000       | 0.79245                 | 0.16981            | 0.03774       |
|                      | 20-24     | 0.54412                 | 0.33824            | 0.11765       | 0.59375                 | 0.34375            | 0.06250       |
|                      | 25-29     | 0.58333                 | 0.33333            | 0.08333       | 0.40000                 | 0.35556            | 0.24444       |
|                      | 30-34     | 0.31481                 | 0.53704            | 0.14815       | 0.38710                 | 0.25806            | 0.35484       |
|                      | 35-39     | 0.52000                 | 0.32000            | 0.16000       | 0.19231                 | 0.57692            | 0.23077       |
|                      | 40-44     | 0.26471                 | 0.44118            | 0.29412       | 0.44000                 | 0.32000            | 0.24000       |
|                      | 45-49     | 0.22917                 | 0.56250            | 0.20833       | 0.24000                 | 0.60000            | 0.16000       |
|                      | 50-54     | 0.20000                 | 0.42857            | 0.37143       | 0.17857                 | 0.50000            | 0.32143       |
|                      | 55-59     | 0.17241                 | 0.44828            | 0.37931       | 0.14286                 | 0.57143            | 0.28571       |
| <b>Department 47</b> | 0-4       | 0.75926                 | 0.18519            | 0.05556       | 0.67347                 | 0.22449            | 0.10204       |
|                      | 5-9       | 0.61538                 | 0.26923            | 0.11538       | 0.58333                 | 0.18333            | 0.23333       |

| Departments   | Age group | Not- overweight in 2005 | Overweight in 2005 | Obese in 2005 | Not- overweight in 2010 | Overweight in 2010 | Obese in 2010 |
|---------------|-----------|-------------------------|--------------------|---------------|-------------------------|--------------------|---------------|
|               | 10-14     | 0.88462                 | 0.11538            | 0.00000       | 0.64063                 | 0.21875            | 0.14063       |
|               | 15-19     | 0.86047                 | 0.11628            | 0.02326       | 0.74194                 | 0.20968            | 0.04839       |
|               | 20-24     | 0.69231                 | 0.21538            | 0.09231       | 0.67568                 | 0.18919            | 0.13514       |
|               | 25-29     | 0.56410                 | 0.29487            | 0.14103       | 0.48936                 | 0.31915            | 0.19149       |
|               | 30-34     | 0.41463                 | 0.36585            | 0.21951       | 0.30556                 | 0.47222            | 0.22222       |
|               | 35-39     | 0.49123                 | 0.40351            | 0.10526       | 0.39535                 | 0.37209            | 0.23256       |
|               | 40-44     | 0.42000                 | 0.34000            | 0.24000       | 0.17778                 | 0.42222            | 0.40000       |
|               | 45-49     | 0.14286                 | 0.50000            | 0.35714       | 0.37209                 | 0.46512            | 0.16279       |
|               | 50-54     | 0.35556                 | 0.37778            | 0.26667       | 0.16279                 | 0.58140            | 0.25581       |
| 55-59         | 0.35897   | 0.33333                 | 0.30769            | 0.22581       | 0.45161                 | 0.32258            |               |
| Department 70 | 0-4       | 0.82353                 | 0.09412            | 0.08235       | 0.81250                 | 0.15625            | 0.03125       |
|               | 5-9       | 0.63333                 | 0.33333            | 0.03333       | 0.75904                 | 0.20482            | 0.03614       |
|               | 10-14     | 0.80000                 | 0.14286            | 0.05714       | 0.72826                 | 0.13043            | 0.14130       |
|               | 15-19     | 0.86364                 | 0.11364            | 0.02273       | 0.83000                 | 0.13000            | 0.04000       |
|               | 20-24     | 0.70513                 | 0.26923            | 0.02564       | 0.76364                 | 0.16364            | 0.07273       |
|               | 25-29     | 0.56522                 | 0.33333            | 0.10145       | 0.37500                 | 0.44643            | 0.17857       |
|               | 30-34     | 0.49057                 | 0.41509            | 0.09434       | 0.51724                 | 0.34483            | 0.13793       |
|               | 35-39     | 0.37681                 | 0.40580            | 0.21739       | 0.37333                 | 0.48000            | 0.14667       |
|               | 40-44     | 0.35593                 | 0.42373            | 0.22034       | 0.25424                 | 0.50847            | 0.23729       |
|               | 45-49     | 0.19565                 | 0.36957            | 0.43478       | 0.22449                 | 0.53061            | 0.24490       |
|               | 50-54     | 0.13636                 | 0.59091            | 0.27273       | 0.28333                 | 0.40000            | 0.31667       |
| 55-59         | 0.31111   | 0.48889                 | 0.20000            | 0.20930       | 0.55814                 | 0.23256            |               |
| Department 88 | 0-4       | 0.78571                 | 0.14286            | 0.07143       | 0.50000                 | 0.33333            | 0.16667       |
|               | 5-9       | 0.36364                 | 0.54545            | 0.09091       | 0.40000                 | 0.40000            | 0.20000       |
|               | 10-14     | 0.81818                 | 0.18182            | 0.00000       | 0.50000                 | 0.33333            | 0.16667       |
|               | 15-19     | 0.64286                 | 0.28571            | 0.07143       | 0.16667                 | 0.33333            | 0.50000       |
|               | 20-24     | 0.61905                 | 0.23810            | 0.14286       | 0.33333                 | 0.33333            | 0.33333       |
|               | 25-29     | 0.45833                 | 0.20833            | 0.33333       | 0.50000                 | 0.30000            | 0.20000       |
|               | 30-34     | 0.13043                 | 0.52174            | 0.34783       | 0.30769                 | 0.46154            | 0.23077       |
|               | 35-39     | 0.33333                 | 0.45833            | 0.20833       | 0.14286                 | 0.42857            | 0.42857       |
|               | 40-44     | 0.29167                 | 0.37500            | 0.33333       | 0.37500                 | 0.50000            | 0.12500       |
|               | 45-49     | 0.34615                 | 0.53846            | 0.11538       | 0.27273                 | 0.54545            | 0.18182       |
|               | 50-54     | 0.21053                 | 0.47368            | 0.31579       | 0.11111                 | 0.55556            | 0.33333       |
| 55-59         | 0.35294   | 0.41176                 | 0.23529            | 0.00000       | 0.83333                 | 0.16667            |               |

**Table 25. Mortality rates and population size by age group at the department level without segregate by socioeconomic status (Caribe region) †**

| Departments  | Age group | Mortality rates (R) (%/year) | Not- overweight population in 2005 (Number of people)1 | Overweight population in 2005 (Number of people)2 | Obese population in 2005 (Number of people)3 |
|--------------|-----------|------------------------------|--------------------------------------------------------|---------------------------------------------------|----------------------------------------------|
| Department 8 | 0-4       | 0.01938                      | 158802                                                 | 39701                                             | 8411                                         |
|              | 5-9       | 0.00050                      | 175670                                                 | 18543                                             | 11711                                        |
|              | 10-14     | 0.00045                      | 168986                                                 | 27174                                             | 8492                                         |
|              | 15-19     | 0.00144                      | 177237                                                 | 20851                                             | 3841                                         |

| Departments          | Age group  | Mortality rates (R) (%/year) | Not- overweight population in 2005 (Number of people)1 | Overweight population in 2005 (Number of people)2 | Obese population in 2005 (Number of people)3 |
|----------------------|------------|------------------------------|--------------------------------------------------------|---------------------------------------------------|----------------------------------------------|
|                      | 20-24      | 0.00314                      | 151239                                                 | 31822                                             | 10170                                        |
|                      | 25-29      | 0.00362                      | 103166                                                 | 46312                                             | 19579                                        |
|                      | 30-34      | 0.00373                      | 76965                                                  | 47160                                             | 22259                                        |
|                      | 35-39      | 0.00360                      | 74259                                                  | 51470                                             | 21217                                        |
|                      | 40-44      | 0.00450                      | 60134                                                  | 53369                                             | 27060                                        |
|                      | 45-49      | 0.00525                      | 44781                                                  | 45139                                             | 24003                                        |
|                      | 50-54      | 0.00763                      | 33602                                                  | 32284                                             | 23390                                        |
|                      | 55-59      | 0.01129                      | 25793                                                  | 28544                                             | 13756                                        |
| <b>Department 13</b> | <b>0-4</b> | <b>0.00398</b>               | <b>121669</b>                                          | <b>21534</b>                                      | <b>5384</b>                                  |
|                      | 5-9        | 0.00020                      | 131004                                                 | 15948                                             | 5696                                         |
|                      | 10-14      | 0.00024                      | 127074                                                 | 16456                                             | 6399                                         |
|                      | 15-19      | 0.00085                      | 128558                                                 | 8815                                              | 1469                                         |
|                      | 20-24      | 0.00129                      | 106653                                                 | 13566                                             | 6081                                         |
|                      | 25-29      | 0.00141                      | 79035                                                  | 27443                                             | 4940                                         |
|                      | 30-34      | 0.00144                      | 52668                                                  | 33214                                             | 12811                                        |
|                      | 35-39      | 0.00145                      | 50616                                                  | 32900                                             | 13666                                        |
|                      | 40-44      | 0.00193                      | 44329                                                  | 31081                                             | 13757                                        |
|                      | 45-49      | 0.00286                      | 29328                                                  | 30154                                             | 13218                                        |
|                      | 50-54      | 0.00338                      | 27228                                                  | 16756                                             | 12567                                        |
|                      | 55-59      | 0.00512                      | 16764                                                  | 17582                                             | 10222                                        |
| <b>Department 20</b> | <b>0-4</b> | <b>0.00407</b>               | <b>61799</b>                                           | <b>12086</b>                                      | <b>1140</b>                                  |
|                      | 5-9        | 0.00030                      | 63879                                                  | 8901                                              | 3142                                         |
|                      | 10-14      | 0.00028                      | 69382                                                  | 3679                                              | 2102                                         |
|                      | 15-19      | 0.00084                      | 58173                                                  | 8573                                              | 1225                                         |
|                      | 20-24      | 0.00215                      | 42807                                                  | 10084                                             | 2470                                         |
|                      | 25-29      | 0.00230                      | 34014                                                  | 11055                                             | 4890                                         |
|                      | 30-34      | 0.00230                      | 23088                                                  | 16711                                             | 4618                                         |
|                      | 35-39      | 0.00237                      | 17984                                                  | 16729                                             | 7946                                         |
|                      | 40-44      | 0.00281                      | 16554                                                  | 14689                                             | 6062                                         |
|                      | 45-49      | 0.00328                      | 9691                                                   | 13528                                             | 6663                                         |
|                      | 50-54      | 0.00504                      | 9930                                                   | 8164                                              | 5296                                         |
|                      | 55-59      | 0.00651                      | 6095                                                   | 7238                                              | 4952                                         |
| <b>Department 23</b> | <b>0-4</b> | <b>0.01525</b>               | <b>65180</b>                                           | <b>12393</b>                                      | <b>2295</b>                                  |
|                      | 5-9        | 0.00109                      | 67508                                                  | 7418                                              | 5193                                         |
|                      | 10-14      | 0.00110                      | 75442                                                  | 6723                                              | 1494                                         |
|                      | 15-19      | 0.00399                      | 63497                                                  | 10499                                             | 2500                                         |
|                      | 20-24      | 0.00906                      | 53375                                                  | 10543                                             | 2306                                         |
|                      | 25-29      | 0.01093                      | 40139                                                  | 12961                                             | 4181                                         |
|                      | 30-34      | 0.01080                      | 28747                                                  | 16660                                             | 4573                                         |
|                      | 35-39      | 0.01026                      | 26376                                                  | 15825                                             | 9043                                         |
|                      | 40-44      | 0.01329                      | 20481                                                  | 18466                                             | 7722                                         |
|                      | 45-49      | 0.01586                      | 17831                                                  | 15974                                             | 4086                                         |
|                      | 50-54      | 0.02344                      | 9589                                                   | 13819                                             | 6205                                         |
|                      | 55-59      | 0.03450                      | 9510                                                   | 8111                                              | 4755                                         |
| <b>Department</b>    | <b>0-4</b> | <b>0.00440</b>               | <b>34473</b>                                           | <b>12241</b>                                      | <b>2814</b>                                  |



| Departments   | Age group | Mortality rates (R) (%/year) | Not- overweight population in 2005 (Number of people)1 | Overweight population in 2005 (Number of people)2 | Obese population in 2005 (Number of people)3 |
|---------------|-----------|------------------------------|--------------------------------------------------------|---------------------------------------------------|----------------------------------------------|
| 44            | 5-9       | 0.00027                      | 38220                                                  | 4303                                              | 1266                                         |
|               | 10-14     | 0.00035                      | 32445                                                  | 6549                                              | 595                                          |
|               | 15-19     | 0.00085                      | 36989                                                  | 3144                                              | 925                                          |
|               | 20-24     | 0.00242                      | 23393                                                  | 8743                                              | 2127                                         |
|               | 25-29     | 0.00217                      | 18637                                                  | 8030                                              | 2776                                         |
|               | 30-34     | 0.00243                      | 11175                                                  | 9101                                              | 3571                                         |
|               | 35-39     | 0.00260                      | 10057                                                  | 9110                                              | 3904                                         |
|               | 40-44     | 0.00225                      | 7802                                                   | 8726                                              | 3901                                         |
|               | 45-49     | 0.00271                      | 5262                                                   | 7016                                              | 4678                                         |
|               | 50-54     | 0.00425                      | 3792                                                   | 5201                                              | 3251                                         |
| 55-59         | 0.00544   | 3523                         | 3523                                                   | 2694                                              |                                              |
| Department 47 | 0-4       | 0.00367                      | 71559                                                  | 16117                                             | 5480                                         |
|               | 5-9       | 0.00045                      | 78818                                                  | 11260                                             | 4636                                         |
|               | 10-14     | 0.00036                      | 78621                                                  | 7609                                              | 507                                          |
|               | 15-19     | 0.00077                      | 69426                                                  | 6899                                              | 1725                                         |
|               | 20-24     | 0.00126                      | 54854                                                  | 11328                                             | 2087                                         |
|               | 25-29     | 0.00154                      | 36590                                                  | 18151                                             | 6915                                         |
|               | 30-34     | 0.00157                      | 26317                                                  | 20861                                             | 7702                                         |
|               | 35-39     | 0.00173                      | 24083                                                  | 19920                                             | 8622                                         |
|               | 40-44     | 0.00215                      | 21299                                                  | 17158                                             | 8579                                         |
|               | 45-49     | 0.00280                      | 11704                                                  | 18031                                             | 9173                                         |
| 50-54         | 0.00451   | 12884                        | 10863                                                  | 7326                                              |                                              |
| 55-59         | 0.00626   | 9886                         | 7469                                                   | 6591                                              |                                              |
| Department 70 | 0-4       | 0.00295                      | 40868                                                  | 8174                                              | 2189                                         |
|               | 5-9       | 0.00022                      | 45197                                                  | 7951                                              | 1255                                         |
|               | 10-14     | 0.00029                      | 50356                                                  | 4997                                              | 769                                          |
|               | 15-19     | 0.00047                      | 44795                                                  | 4508                                              | 1409                                         |
|               | 20-24     | 0.00110                      | 33633                                                  | 7579                                              | 1421                                         |
|               | 25-29     | 0.00139                      | 24874                                                  | 10613                                             | 1990                                         |
|               | 30-34     | 0.00124                      | 16823                                                  | 12235                                             | 4129                                         |
|               | 35-39     | 0.00178                      | 15398                                                  | 13706                                             | 5076                                         |
|               | 40-44     | 0.00164                      | 12988                                                  | 12811                                             | 4626                                         |
|               | 45-49     | 0.00281                      | 8282                                                   | 9444                                              | 7556                                         |
| 50-54         | 0.00387   | 6860                         | 8861                                                   | 4431                                              |                                              |
| 55-59         | 0.00514   | 7136                         | 5769                                                   | 3644                                              |                                              |
| Department 88 | 0-4       | 0.00204                      | 2873                                                   | 1149                                              | 383                                          |
|               | 5-9       | 0.00021                      | 3082                                                   | 1110                                              | 493                                          |
|               | 10-14     | 0.00040                      | 3376                                                   | 1206                                              | 362                                          |
|               | 15-19     | 0.00084                      | 3121                                                   | 1040                                              | 578                                          |
|               | 20-24     | 0.00207                      | 2988                                                   | 934                                               | 436                                          |
|               | 25-29     | 0.00075                      | 1970                                                   | 1275                                              | 753                                          |
|               | 30-34     | 0.00086                      | 1142                                                   | 1442                                              | 901                                          |
|               | 35-39     | 0.00190                      | 1748                                                   | 1447                                              | 1025                                         |
|               | 40-44     | 0.00244                      | 1501                                                   | 1705                                              | 1296                                         |
| 45-49         | 0.00359   | 1149                         | 1666                                                   | 804                                               |                                              |

| Departments | Age group | Mortality rates (R) (%/year) | Not- overweight population in 2005 (Number of people) <sup>1</sup> | Overweight population in 2005 (Number of people) <sup>2</sup> | Obese population in 2005 (Number of people) <sup>3</sup> |
|-------------|-----------|------------------------------|--------------------------------------------------------------------|---------------------------------------------------------------|----------------------------------------------------------|
|             | 50-54     | 0.00436                      | 826                                                                | 782                                                           | 913                                                      |
|             | 55-59     | 0.00848                      | 388                                                                | 874                                                           | 388                                                      |

<sup>†</sup>Values used in this table are for the urban population

<sup>1</sup> Initial value used in the stock of not-overweight population in 2005.

<sup>2</sup> Initial value used in the stock of overweight population in 2005.

<sup>3</sup> Initial value used in the stock of obese population in 2005.

**Table 26. Mortality rates and population size by age group at the department level for the lower socioeconomic status population (Caribe region) <sup>†</sup>**

| Departments   | Age group | Mortality rates (R) (%/year) | Not- overweight population in 2005 (Number of people) <sup>1</sup> | Overweight population in 2005 (Number of people) <sup>2</sup> | Obese population in 2005 (Number of people) <sup>3</sup> |
|---------------|-----------|------------------------------|--------------------------------------------------------------------|---------------------------------------------------------------|----------------------------------------------------------|
| Department 8  | 0-4       | 0.01938                      | 67394                                                              | 16849                                                         | 3570                                                     |
|               | 5-9       | 0.00050                      | 59112                                                              | 6240                                                          | 3941                                                     |
|               | 10-14     | 0.00045                      | 53991                                                              | 8682                                                          | 2713                                                     |
|               | 15-19     | 0.00144                      | 63574                                                              | 7479                                                          | 1378                                                     |
|               | 20-24     | 0.00314                      | 48016                                                              | 10103                                                         | 3229                                                     |
|               | 25-29     | 0.00362                      | 28951                                                              | 12996                                                         | 5494                                                     |
|               | 30-34     | 0.00373                      | 21225                                                              | 13005                                                         | 6139                                                     |
|               | 35-39     | 0.00360                      | 22238                                                              | 15414                                                         | 6354                                                     |
|               | 40-44     | 0.00450                      | 18812                                                              | 16696                                                         | 8465                                                     |
|               | 45-49     | 0.00525                      | 10280                                                              | 10362                                                         | 5510                                                     |
| Department 13 | 50-54     | 0.00763                      | 10043                                                              | 9650                                                          | 6991                                                     |
|               | 55-59     | 0.01129                      | 6123                                                               | 6776                                                          | 3265                                                     |
|               | 0-4       | 0.00398                      | 52759                                                              | 6999                                                          | 1077                                                     |
|               | 5-9       | 0.00020                      | 61515                                                              | 7974                                                          | 2278                                                     |
|               | 10-14     | 0.00024                      | 56680                                                              | 5485                                                          | 1828                                                     |
|               | 15-19     | 0.00085                      | 43343                                                              | 735                                                           | 735                                                      |
|               | 20-24     | 0.00129                      | 35083                                                              | 5613                                                          | 3274                                                     |
|               | 25-29     | 0.00141                      | 28540                                                              | 7684                                                          | 2195                                                     |
|               | 30-34     | 0.00144                      | 19929                                                              | 9490                                                          | 4270                                                     |
|               | 35-39     | 0.00145                      | 18222                                                              | 11135                                                         | 2531                                                     |
| Department 20 | 40-44     | 0.00193                      | 20381                                                              | 10191                                                         | 5095                                                     |
|               | 45-49     | 0.00286                      | 10740                                                              | 8261                                                          | 2478                                                     |
|               | 50-54     | 0.00338                      | 11729                                                              | 4189                                                          | 419                                                      |
|               | 55-59     | 0.00512                      | 8586                                                               | 4907                                                          | 1227                                                     |
|               | 0-4       | 0.00407                      | 34662                                                              | 4789                                                          | 228                                                      |
|               | 5-9       | 0.00030                      | 29845                                                              | 3142                                                          | 524                                                      |
|               | 10-14     | 0.00028                      | 31537                                                              | 1051                                                          | 526                                                      |
|               | 15-19     | 0.00084                      | 21126                                                              | 2756                                                          | 612                                                      |
|               | 20-24     | 0.00215                      | 19757                                                              | 4116                                                          | 1235                                                     |
|               | 25-29     | 0.00230                      | 13606                                                              | 4039                                                          | 1913                                                     |
| 30-34         | 0.00230   | 12094                        | 4837                                                               | 1979                                                          |                                                          |
| 35-39         | 0.00237   | 8574                         | 6482                                                               | 2509                                                          |                                                          |
| 40-44         | 0.00281   | 6062                         | 3730                                                               | 933                                                           |                                                          |

| Departments   | Age group     | Mortality rates (R) (%/year) | Not- overweight population in 2005 (Number of people)1 | Overweight population in 2005 (Number of people)2 | Obese population in 2005 (Number of people)3 |
|---------------|---------------|------------------------------|--------------------------------------------------------|---------------------------------------------------|----------------------------------------------|
|               | 45-49         | 0.00328                      | 3634                                                   | 5250                                              | 1010                                         |
|               | 50-54         | 0.00504                      | 4193                                                   | 2648                                              | 662                                          |
|               | 55-59         | 0.00651                      | 2667                                                   | 952                                               | 952                                          |
| Department 23 | 0-4           | 0.01525                      | 41311                                                  | 7344                                              | 918                                          |
|               | 5-9           | 0.00109                      | 44511                                                  | 5193                                              | 2226                                         |
|               | 10-14         | 0.00110                      | 44070                                                  | 1494                                              | 747                                          |
|               | 15-19         | 0.00399                      | 33498                                                  | 4500                                              | 0                                            |
|               | 20-24         | 0.00906                      | 28005                                                  | 4613                                              | 988                                          |
|               | 25-29         | 0.01093                      | 20905                                                  | 7526                                              | 836                                          |
|               | 30-34         | 0.01080                      | 15027                                                  | 8820                                              | 2613                                         |
|               | 35-39         | 0.01026                      | 16202                                                  | 6782                                              | 4522                                         |
|               | 40-44         | 0.01329                      | 9737                                                   | 6043                                              | 5372                                         |
|               | 45-49         | 0.01586                      | 10030                                                  | 6687                                              | 1857                                         |
|               | 50-54         | 0.02344                      | 7333                                                   | 5923                                              | 3102                                         |
|               | 55-59         | 0.03450                      | 5874                                                   | 2797                                              | 839                                          |
|               | Department 44 | 0-4                          | 0.00440                                                | 19277                                             | 5910                                         |
| 5-9           |               | 0.00027                      | 24299                                                  | 1772                                              | 0                                            |
| 10-14         |               | 0.00035                      | 15478                                                  | 3274                                              | 0                                            |
| 15-19         |               | 0.00085                      | 16090                                                  | 1665                                              | 370                                          |
| 20-24         |               | 0.00242                      | 10515                                                  | 2954                                              | 709                                          |
| 25-29         |               | 0.00217                      | 9219                                                   | 3470                                              | 1090                                         |
| 30-34         |               | 0.00243                      | 5415                                                   | 2765                                              | 1843                                         |
| 35-39         |               | 0.00260                      | 3668                                                   | 3904                                              | 1420                                         |
| 40-44         |               | 0.00225                      | 3593                                                   | 2977                                              | 616                                          |
| 45-49         |               | 0.00271                      | 2456                                                   | 1403                                              | 1520                                         |
| 50-54         |               | 0.00425                      | 1842                                                   | 1517                                              | 867                                          |
| 55-59         |               | 0.00544                      | 1865                                                   | 829                                               | 725                                          |
| Department 47 |               | 0-4                          | 0.00367                                                | 39648                                             | 8703                                         |
|               | 5-9           | 0.00045                      | 45039                                                  | 3974                                              | 0                                            |
|               | 10-14         | 0.00036                      | 39057                                                  | 3551                                              | 507                                          |
|               | 15-19         | 0.00077                      | 37947                                                  | 2156                                              | 431                                          |
|               | 20-24         | 0.00126                      | 27725                                                  | 3279                                              | 0                                            |
|               | 25-29         | 0.00154                      | 15558                                                  | 8067                                              | 1152                                         |
|               | 30-34         | 0.00157                      | 13479                                                  | 8665                                              | 3209                                         |
|               | 35-39         | 0.00173                      | 9811                                                   | 7433                                              | 3865                                         |
|               | 40-44         | 0.00215                      | 7691                                                   | 5621                                              | 2071                                         |
|               | 45-49         | 0.00280                      | 7275                                                   | 6643                                              | 2214                                         |
|               | 50-54         | 0.00451                      | 7074                                                   | 5305                                              | 2779                                         |
|               | 55-59         | 0.00626                      | 4833                                                   | 2636                                              | 1977                                         |
|               | Department 70 | 0-4                          | 0.00295                                                | 23645                                             | 5692                                         |
| 5-9           |               | 0.00022                      | 25110                                                  | 1674                                              | 418                                          |
| 10-14         |               | 0.00029                      | 28061                                                  | 1153                                              | 0                                            |
| 15-19         |               | 0.00047                      | 24510                                                  | 2254                                              | 563                                          |
| 20-24         |               | 0.00110                      | 14527                                                  | 2842                                              | 1105                                         |
| 25-29         |               | 0.00139                      | 12105                                                  | 3980                                              | 332                                          |

| Departments   | Age group | Mortality rates (R) (%/year) | Not- overweight population in 2005 (Number of people) <sup>1</sup> | Overweight population in 2005 (Number of people) <sup>2</sup> | Obese population in 2005 (Number of people) <sup>3</sup> |
|---------------|-----------|------------------------------|--------------------------------------------------------------------|---------------------------------------------------------------|----------------------------------------------------------|
|               | 30-34     | 0.00124                      | 8870                                                               | 6576                                                          | 1376                                                     |
|               | 35-39     | 0.00178                      | 6938                                                               | 5415                                                          | 1523                                                     |
|               | 40-44     | 0.00164                      | 6405                                                               | 5160                                                          | 1245                                                     |
|               | 45-49     | 0.00281                      | 4214                                                               | 4940                                                          | 2325                                                     |
|               | 50-54     | 0.00387                      | 3001                                                               | 2716                                                          | 1572                                                     |
|               | 55-59     | 0.00514                      | 3492                                                               | 1974                                                          | 1518                                                     |
| Department 88 | 0-4       | 0.00204                      | 1101                                                               | 431                                                           | 48                                                       |
|               | 5-9       | 0.00021                      | 1849                                                               | 123                                                           | 123                                                      |
|               | 10-14     | 0.00040                      | 1567                                                               | 362                                                           | 121                                                      |
|               | 15-19     | 0.00084                      | 1271                                                               | 462                                                           | 0                                                        |
|               | 20-24     | 0.00207                      | 1120                                                               | 373                                                           | 124                                                      |
|               | 25-29     | 0.00075                      | 869                                                                | 174                                                           | 58                                                       |
|               | 30-34     | 0.00086                      | 481                                                                | 180                                                           | 120                                                      |
|               | 35-39     | 0.00190                      | 663                                                                | 241                                                           | 181                                                      |
|               | 40-44     | 0.00244                      | 341                                                                | 409                                                           | 409                                                      |
|               | 45-49     | 0.00359                      | 460                                                                | 287                                                           | 287                                                      |
| 50-54         | 0.00436   | 217                          | 43                                                                 | 174                                                           |                                                          |
| 55-59         | 0.00848   | 97                           | 146                                                                | 49                                                            |                                                          |

<sup>†</sup>Values used in this table are for the urban population

<sup>1</sup> Initial value used in the stock of not-overweight population in 2005 for lower SES.

<sup>2</sup> Initial value used in the stock of overweight population in 2005 for lower SES.

<sup>3</sup> Initial value used in the stock of obese population in 2005 for lower SES.

**Table 27. Mortality rates and population size by age group at the department level for the middle socioeconomic status population (Caribe region) <sup>†</sup>**

| Departments   | Age group | Mortality rates (R) (%/year) | Not- overweight population in 2005 (Number of people) <sup>1</sup> | Overweight population in 2005 (Number of people) <sup>2</sup> | Obese population in 2005 (Number of people) <sup>3</sup> |
|---------------|-----------|------------------------------|--------------------------------------------------------------------|---------------------------------------------------------------|----------------------------------------------------------|
| Department 8  | 0-4       | 0.01938                      | 45084                                                              | 9757                                                          | 2355                                                     |
|               | 5-9       | 0.00050                      | 50749                                                              | 4880                                                          | 976                                                      |
|               | 10-14     | 0.00045                      | 55196                                                              | 5095                                                          | 1698                                                     |
|               | 15-19     | 0.00144                      | 43349                                                              | 6036                                                          | 549                                                      |
|               | 20-24     | 0.00314                      | 44945                                                              | 6889                                                          | 3609                                                     |
|               | 25-29     | 0.00362                      | 33887                                                              | 13178                                                         | 6024                                                     |
|               | 30-34     | 0.00373                      | 21128                                                              | 14337                                                         | 3773                                                     |
|               | 35-39     | 0.00360                      | 23574                                                              | 12966                                                         | 5501                                                     |
|               | 40-44     | 0.00450                      | 13906                                                              | 18040                                                         | 7517                                                     |
|               | 45-49     | 0.00525                      | 13255                                                              | 16121                                                         | 6090                                                     |
|               | 50-54     | 0.00763                      | 8565                                                               | 8565                                                          | 5930                                                     |
| 55-59         | 0.01129   | 9285                         | 5502                                                               | 2407                                                          |                                                          |
| Department 13 | 0-4       | 0.00398                      | 32302                                                              | 7537                                                          | 538                                                      |
|               | 5-9       | 0.00020                      | 30757                                                              | 2278                                                          | 1139                                                     |
|               | 10-14     | 0.00024                      | 25598                                                              | 2743                                                          | 914                                                      |
|               | 15-19     | 0.00085                      | 29385                                                              | 0                                                             | 0                                                        |
|               | 20-24     | 0.00129                      | 22453                                                              | 3274                                                          | 936                                                      |

| Departments   | Age group     | Mortality rates (R) (%/year) | Not- overweight population in 2005 (Number of people)1 | Overweight population in 2005 (Number of people)2 | Obese population in 2005 (Number of people)3 |
|---------------|---------------|------------------------------|--------------------------------------------------------|---------------------------------------------------|----------------------------------------------|
|               | 25-29         | 0.00141                      | 18661                                                  | 6586                                              | 549                                          |
|               | 30-34         | 0.00144                      | 9964                                                   | 10439                                             | 2847                                         |
|               | 35-39         | 0.00145                      | 12654                                                  | 7592                                              | 5568                                         |
|               | 40-44         | 0.00193                      | 10191                                                  | 4586                                              | 3567                                         |
|               | 45-49         | 0.00286                      | 5370                                                   | 4957                                              | 826                                          |
|               | 50-54         | 0.00338                      | 4608                                                   | 3351                                              | 3351                                         |
|               | 55-59         | 0.00512                      | 2044                                                   | 4089                                              | 2044                                         |
| Department 20 | 0-4           | 0.00407                      | 15735                                                  | 4561                                              | 228                                          |
|               | 5-9           | 0.00030                      | 23562                                                  | 3665                                              | 1571                                         |
|               | 10-14         | 0.00028                      | 25230                                                  | 2102                                              | 526                                          |
|               | 15-19         | 0.00084                      | 19595                                                  | 3368                                              | 306                                          |
|               | 20-24         | 0.00215                      | 11937                                                  | 2881                                              | 617                                          |
|               | 25-29         | 0.00230                      | 10842                                                  | 4039                                              | 1488                                         |
|               | 30-34         | 0.00230                      | 5497                                                   | 5937                                              | 1539                                         |
|               | 35-39         | 0.00237                      | 6273                                                   | 5228                                              | 2509                                         |
|               | 40-44         | 0.00281                      | 5596                                                   | 4896                                              | 2332                                         |
|               | 45-49         | 0.00328                      | 3432                                                   | 4442                                              | 2625                                         |
|               | 50-54         | 0.00504                      | 3751                                                   | 3310                                              | 1545                                         |
|               | 55-59         | 0.00651                      | 2476                                                   | 3048                                              | 2095                                         |
|               | Department 23 | 0-4                          | 0.01525                                                | 14229                                             | 2754                                         |
| 5-9           |               | 0.00109                      | 14837                                                  | 1484                                              | 2226                                         |
| 10-14         |               | 0.00110                      | 19421                                                  | 2988                                              | 747                                          |
| 15-19         |               | 0.00399                      | 13499                                                  | 2000                                              | 2000                                         |
| 20-24         |               | 0.00906                      | 11202                                                  | 2636                                              | 0                                            |
| 25-29         |               | 0.01093                      | 10453                                                  | 2509                                              | 2509                                         |
| 30-34         |               | 0.01080                      | 7840                                                   | 3267                                              | 980                                          |
| 35-39         |               | 0.01026                      | 6029                                                   | 4522                                              | 1130                                         |
| 40-44         |               | 0.01329                      | 5036                                                   | 7051                                              | 2014                                         |
| 45-49         |               | 0.01586                      | 2972                                                   | 3343                                              | 743                                          |
| 50-54         |               | 0.02344                      | 1410                                                   | 1974                                              | 846                                          |
| 55-59         |               | 0.03450                      | 1399                                                   | 2797                                              | 1399                                         |
| Department 44 |               | 0-4                          | 0.00440                                                | 9427                                              | 3799                                         |
|               | 5-9           | 0.00027                      | 9618                                                   | 759                                               | 506                                          |
|               | 10-14         | 0.00035                      | 8930                                                   | 1191                                              | 0                                            |
|               | 15-19         | 0.00085                      | 12391                                                  | 555                                               | 555                                          |
|               | 20-24         | 0.00242                      | 8506                                                   | 3072                                              | 473                                          |
|               | 25-29         | 0.00217                      | 5254                                                   | 2181                                              | 1090                                         |
|               | 30-34         | 0.00243                      | 3802                                                   | 2995                                              | 806                                          |
|               | 35-39         | 0.00260                      | 3313                                                   | 3313                                              | 1538                                         |
|               | 40-44         | 0.00225                      | 2361                                                   | 2669                                              | 1232                                         |
|               | 45-49         | 0.00271                      | 1520                                                   | 2456                                              | 1988                                         |
|               | 50-54         | 0.00425                      | 1192                                                   | 2059                                              | 975                                          |
|               | 55-59         | 0.00544                      | 1140                                                   | 1347                                              | 829                                          |
|               | Department 47 | 0-4                          | 18696                                                  | 4190                                              | 2256                                         |
| 5-9           |               | 23182                        | 2649                                                   | 2649                                              | 23182                                        |

| Departments   | Age group | Mortality rates (R) (%/year) | Not- overweight population in 2005 (Number of people) <sup>1</sup> | Overweight population in 2005 (Number of people) <sup>2</sup> | Obese population in 2005 (Number of people) <sup>3</sup> |
|---------------|-----------|------------------------------|--------------------------------------------------------------------|---------------------------------------------------------------|----------------------------------------------------------|
|               | 10-14     | 27898                        | 2536                                                               | 0                                                             | 27898                                                    |
|               | 15-19     | 15524                        | 2587                                                               | 862                                                           | 15524                                                    |
|               | 20-24     | 13713                        | 3876                                                               | 298                                                           | 13713                                                    |
|               | 25-29     | 8355                         | 3457                                                               | 2593                                                          | 8355                                                     |
|               | 30-34     | 7382                         | 7382                                                               | 1605                                                          | 7382                                                     |
|               | 35-39     | 5946                         | 5649                                                               | 2973                                                          | 5946                                                     |
|               | 40-44     | 7396                         | 6508                                                               | 2958                                                          | 7396                                                     |
|               | 45-49     | 2531                         | 4745                                                               | 2214                                                          | 2531                                                     |
|               | 50-54     | 1768                         | 1263                                                               | 1516                                                          | 1768                                                     |
|               | 55-59     | 1977                         | 1977                                                               | 1977                                                          | 1977                                                     |
| Department 70 | 0-4       | 0.00295                      | 7006                                                               | 1314                                                          | 584                                                      |
|               | 5-9       | 0.00022                      | 12136                                                              | 2092                                                          | 418                                                      |
|               | 10-14     | 0.00029                      | 11532                                                              | 1922                                                          | 0                                                        |
|               | 15-19     | 0.00047                      | 9579                                                               | 845                                                           | 563                                                      |
|               | 20-24     | 0.00110                      | 10421                                                              | 1421                                                          | 0                                                        |
|               | 25-29     | 0.00139                      | 6301                                                               | 2819                                                          | 497                                                      |
|               | 30-34     | 0.00124                      | 3976                                                               | 2294                                                          | 1988                                                     |
|               | 35-39     | 0.00178                      | 4061                                                               | 3553                                                          | 1015                                                     |
|               | 40-44     | 0.00164                      | 2847                                                               | 3203                                                          | 1068                                                     |
|               | 45-49     | 0.00281                      | 2761                                                               | 2034                                                          | 2325                                                     |
| Department 88 | 0-4       | 0.00204                      | 718                                                                | 527                                                           | 239                                                      |
|               | 5-9       | 0.00021                      | 740                                                                | 247                                                           | 247                                                      |
|               | 10-14     | 0.00040                      | 723                                                                | 603                                                           | 241                                                      |
|               | 15-19     | 0.00084                      | 809                                                                | 116                                                           | 462                                                      |
|               | 20-24     | 0.00207                      | 1058                                                               | 249                                                           | 124                                                      |
|               | 25-29     | 0.00075                      | 464                                                                | 811                                                           | 232                                                      |
|               | 30-34     | 0.00086                      | 481                                                                | 541                                                           | 300                                                      |
|               | 35-39     | 0.00190                      | 603                                                                | 542                                                           | 542                                                      |
|               | 40-44     | 0.00244                      | 682                                                                | 682                                                           | 341                                                      |
|               | 45-49     | 0.00359                      | 172                                                                | 574                                                           | 345                                                      |
|               | 50-54     | 0.00436                      | 435                                                                | 348                                                           | 478                                                      |
|               | 55-59     | 0.00848                      | 0                                                                  | 388                                                           | 146                                                      |

† Values used in this table are for the urban population

1 Initial value used in the stock of not-overweight population in 2005 for middle SES.

2 Initial value used in the stock of overweight population in 2005 for middle SES.

3 Initial value used in the stock of obese population in 2005 for middle SES.

**Table 28. Mortality rates and population size by age group at the department level for the higher socioeconomic status population (Caribe region) †**

| Departments   | Age group     | Mortality rates (R) (%/year) | Not- overweight population in 2005 (Number of people)1 | Overweight population in 2005 (Number of people)2 | Obese population in 2005 (Number of people)3 |
|---------------|---------------|------------------------------|--------------------------------------------------------|---------------------------------------------------|----------------------------------------------|
| Department 8  | 0-4           | 0.01938                      | 45084                                                  | 12785                                             | 4037                                         |
|               | 5-9           | 0.00050                      | 59533                                                  | 10735                                             | 9759                                         |
|               | 10-14         | 0.00045                      | 52649                                                  | 18682                                             | 5944                                         |
|               | 15-19         | 0.00144                      | 64749                                                  | 11523                                             | 3292                                         |
|               | 20-24         | 0.00314                      | 55771                                                  | 15747                                             | 4921                                         |
|               | 25-29         | 0.00362                      | 41793                                                  | 19202                                             | 7530                                         |
|               | 30-34         | 0.00373                      | 27919                                                  | 24146                                             | 14714                                        |
|               | 35-39         | 0.00360                      | 24360                                                  | 25932                                             | 10608                                        |
|               | 40-44         | 0.00450                      | 20295                                                  | 22550                                             | 14282                                        |
|               | 45-49         | 0.00525                      | 18987                                                  | 21853                                             | 11464                                        |
|               | 50-54         | 0.00763                      | 10212                                                  | 16801                                             | 12518                                        |
| 55-59         | 0.01129       | 8254                         | 18571                                                  | 7910                                              |                                              |
| Department 13 | 0-4           | 0.00398                      | 36608                                                  | 6999                                              | 3769                                         |
|               | 5-9           | 0.00020                      | 38732                                                  | 5696                                              | 2278                                         |
|               | 10-14         | 0.00024                      | 44796                                                  | 8228                                              | 3657                                         |
|               | 15-19         | 0.00085                      | 55831                                                  | 8081                                              | 735                                          |
|               | 20-24         | 0.00129                      | 49117                                                  | 4678                                              | 1871                                         |
|               | 25-29         | 0.00141                      | 31833                                                  | 13172                                             | 2195                                         |
|               | 30-34         | 0.00144                      | 22776                                                  | 13286                                             | 5694                                         |
|               | 35-39         | 0.00145                      | 19740                                                  | 14172                                             | 5568                                         |
|               | 40-44         | 0.00193                      | 13757                                                  | 16305                                             | 5095                                         |
|               | 45-49         | 0.00286                      | 13218                                                  | 16936                                             | 9914                                         |
|               | 50-54         | 0.00338                      | 10891                                                  | 9216                                              | 8797                                         |
|               | 55-59         | 0.00512                      | 6133                                                   | 8586                                              | 6951                                         |
|               | Department 20 | 0-4                          | 0.00407                                                | 11402                                             | 2736                                         |
| 5-9           |               | 0.00030                      | 10472                                                  | 2094                                              | 1047                                         |
| 10-14         |               | 0.00028                      | 12615                                                  | 526                                               | 1051                                         |
| 15-19         |               | 0.00084                      | 17452                                                  | 2449                                              | 306                                          |
| 20-24         |               | 0.00215                      | 11113                                                  | 3087                                              | 617                                          |
| 25-29         |               | 0.00230                      | 9566                                                   | 2976                                              | 1488                                         |
| 30-34         |               | 0.00230                      | 5497                                                   | 5937                                              | 1099                                         |
| 35-39         |               | 0.00237                      | 3137                                                   | 5019                                              | 2928                                         |
| 40-44         |               | 0.00281                      | 4896                                                   | 6062                                              | 2798                                         |
| 45-49         |               | 0.00328                      | 2625                                                   | 3836                                              | 3029                                         |
| 50-54         |               | 0.00504                      | 1986                                                   | 2207                                              | 3089                                         |
| 55-59         | 0.00651       | 952                          | 3238                                                   | 1905                                              |                                              |
| Department 23 | 0-4           | 0.01525                      | 9639                                                   | 2295                                              | 918                                          |
|               | 5-9           | 0.00109                      | 8160                                                   | 742                                               | 742                                          |
|               | 10-14         | 0.00110                      | 11951                                                  | 2241                                              | 0                                            |
|               | 15-19         | 0.00399                      | 16499                                                  | 4000                                              | 500                                          |
|               | 20-24         | 0.00906                      | 14167                                                  | 3295                                              | 1318                                         |
|               | 25-29         | 0.01093                      | 8780                                                   | 2927                                              | 836                                          |
|               | 30-34         | 0.01080                      | 5880                                                   | 4573                                              | 980                                          |
|               | 35-39         | 0.01026                      | 4145                                                   | 4522                                              | 3391                                         |
|               | 40-44         | 0.01329                      | 5708                                                   | 5372                                              | 336                                          |

| Departments   | Age group     | Mortality rates (R) (%/year) | Not- overweight population in 2005 (Number of people)1 | Overweight population in 2005 (Number of people)2 | Obese population in 2005 (Number of people)3 |
|---------------|---------------|------------------------------|--------------------------------------------------------|---------------------------------------------------|----------------------------------------------|
|               | 45-49         | 0.01586                      | 4829                                                   | 5944                                              | 1486                                         |
|               | 50-54         | 0.02344                      | 846                                                    | 5923                                              | 2256                                         |
|               | 55-59         | 0.03450                      | 2238                                                   | 2517                                              | 2517                                         |
| Department 44 | 0-4           | 0.00440                      | 5769                                                   | 2533                                              | 844                                          |
|               | 5-9           | 0.00027                      | 4303                                                   | 1772                                              | 759                                          |
|               | 10-14         | 0.00035                      | 8037                                                   | 2084                                              | 595                                          |
|               | 15-19         | 0.00085                      | 8508                                                   | 925                                               | 0                                            |
|               | 20-24         | 0.00242                      | 4371                                                   | 2717                                              | 945                                          |
|               | 25-29         | 0.00217                      | 4164                                                   | 2379                                              | 595                                          |
|               | 30-34         | 0.00243                      | 1959                                                   | 3341                                              | 922                                          |
|               | 35-39         | 0.00260                      | 3076                                                   | 1893                                              | 947                                          |
|               | 40-44         | 0.00225                      | 1848                                                   | 3080                                              | 2053                                         |
|               | 45-49         | 0.00271                      | 1286                                                   | 3157                                              | 1169                                         |
|               | 50-54         | 0.00425                      | 758                                                    | 1625                                              | 1409                                         |
|               | 55-59         | 0.00544                      | 518                                                    | 1347                                              | 1140                                         |
|               | Department 47 | 0-4                          | 0.00367                                                | 13216                                             | 3223                                         |
| 5-9           |               | 0.00045                      | 10597                                                  | 4636                                              | 1987                                         |
| 10-14         |               | 0.00036                      | 11666                                                  | 1522                                              | 0                                            |
| 15-19         |               | 0.00077                      | 15955                                                  | 2156                                              | 431                                          |
| 20-24         |               | 0.00126                      | 13415                                                  | 4174                                              | 1789                                         |
| 25-29         |               | 0.00154                      | 12677                                                  | 6627                                              | 3169                                         |
| 30-34         |               | 0.00157                      | 5456                                                   | 4814                                              | 2888                                         |
| 35-39         |               | 0.00173                      | 8325                                                   | 6838                                              | 1784                                         |
| 40-44         |               | 0.00215                      | 6212                                                   | 5029                                              | 3550                                         |
| 45-49         |               | 0.00280                      | 1898                                                   | 6643                                              | 4745                                         |
| 50-54         |               | 0.00451                      | 4042                                                   | 4295                                              | 3032                                         |
| 55-59         |               | 0.00626                      | 3076                                                   | 2856                                              | 2636                                         |
| Department 70 |               | 0-4                          | 0.00295                                                | 10217                                             | 1168                                         |
|               | 5-9           | 0.00022                      | 7951                                                   | 4185                                              | 418                                          |
|               | 10-14         | 0.00029                      | 10763                                                  | 1922                                              | 769                                          |
|               | 15-19         | 0.00047                      | 10706                                                  | 1409                                              | 282                                          |
|               | 20-24         | 0.00110                      | 8685                                                   | 3316                                              | 316                                          |
|               | 25-29         | 0.00139                      | 6467                                                   | 3814                                              | 1161                                         |
|               | 30-34         | 0.00124                      | 3976                                                   | 3365                                              | 765                                          |
|               | 35-39         | 0.00178                      | 4400                                                   | 4738                                              | 2538                                         |
|               | 40-44         | 0.00164                      | 3736                                                   | 4448                                              | 2313                                         |
|               | 45-49         | 0.00281                      | 1308                                                   | 2470                                              | 2906                                         |
|               | 50-54         | 0.00387                      | 858                                                    | 3716                                              | 1715                                         |
|               | 55-59         | 0.00514                      | 2126                                                   | 3340                                              | 1366                                         |
|               | Department 88 | 0-4                          | 0.00204                                                | 1053                                              | 192                                          |
| 5-9           |               | 0.00021                      | 493                                                    | 740                                               | 123                                          |
| 10-14         |               | 0.00040                      | 1085                                                   | 241                                               | 0                                            |
| 15-19         |               | 0.00084                      | 1040                                                   | 462                                               | 116                                          |
| 20-24         |               | 0.00207                      | 809                                                    | 311                                               | 187                                          |
| 25-29         |               | 0.00075                      | 637                                                    | 290                                               | 464                                          |



| Departments | Age group | Mortality rates (R) (%/year) | Not- overweight population in 2005 (Number of people) <sup>1</sup> | Overweight population in 2005 (Number of people) <sup>2</sup> | Obese population in 2005 (Number of people) <sup>3</sup> |
|-------------|-----------|------------------------------|--------------------------------------------------------------------|---------------------------------------------------------------|----------------------------------------------------------|
|             | 30-34     | 0.00086                      | 180                                                                | 721                                                           | 481                                                      |
|             | 35-39     | 0.00190                      | 482                                                                | 663                                                           | 301                                                      |
|             | 40-44     | 0.00244                      | 477                                                                | 614                                                           | 546                                                      |
|             | 45-49     | 0.00359                      | 517                                                                | 804                                                           | 172                                                      |
|             | 50-54     | 0.00436                      | 174                                                                | 391                                                           | 261                                                      |
|             | 55-59     | 0.00848                      | 291                                                                | 340                                                           | 194                                                      |

†Values used in this table are for the urban population

<sup>1</sup> Initial value used in the stock of not-overweight population in 2005 for higher SES.

<sup>2</sup> Initial value used in the stock of overweight population in 2005 for higher SES.

<sup>3</sup> Initial value used in the stock of obese population in 2005 for higher SES.

## 1.2 Oriental region

The Oriental region of Colombia is located in the central eastern part of the national territory and consists of five departments, these are:

- Boyacá (15)
- Cundinamarca (25)
- Meta (50)
- Norte De Santander (54)
- Santander (68)

### 1.2.1 Data and model parameters used

**Table 29. Prevalent rates of entire population by age group, gender, and body mass index category in 2005 (Oriental region)**

| Age Group | Nutritional State Males |           |         | Nutritional State Females |           |         |
|-----------|-------------------------|-----------|---------|---------------------------|-----------|---------|
|           | Not-Overweigh           | Overweigh | Obese   | Not-Overweigh             | Overweigh | Obese   |
| 0-4       | 0.72968                 | 0.19471   | 0.07561 | 0.76311                   | 0.19417   | 0.04272 |
| 5-9       | 0.77491                 | 0.15867   | 0.06642 | 0.83459                   | 0.11654   | 0.04887 |
| 10-14     | 0.80695                 | 0.11969   | 0.07336 | 0.81469                   | 0.16084   | 0.02448 |
| 15-19     | 0.91923                 | 0.06538   | 0.01538 | 0.83235                   | 0.13529   | 0.03235 |
| 20-24     | 0.73981                 | 0.21317   | 0.04702 | 0.72453                   | 0.22830   | 0.04717 |
| 25-29     | 0.58462                 | 0.31923   | 0.09615 | 0.62268                   | 0.29691   | 0.08041 |
| 30-34     | 0.51639                 | 0.36885   | 0.11475 | 0.48182                   | 0.37273   | 0.14545 |
| 35-39     | 0.42424                 | 0.43290   | 0.14286 | 0.47368                   | 0.36000   | 0.16632 |
| 40-44     | 0.42553                 | 0.42553   | 0.14894 | 0.36893                   | 0.37864   | 0.25243 |
| 45-49     | 0.35593                 | 0.45198   | 0.19209 | 0.26221                   | 0.47301   | 0.26478 |
| 50-54     | 0.37805                 | 0.42683   | 0.19512 | 0.27303                   | 0.43421   | 0.29276 |
| 55-59     | 0.39716                 | 0.41135   | 0.19149 | 0.24783                   | 0.44348   | 0.30870 |

**Table 30. Prevalent rates of lower socioeconomic status population by age group, gender, and body mass index category in 2005 (Oriental region)**

| Age Group | Nutritional State Males |           |         | Nutritional State Females |           |         |
|-----------|-------------------------|-----------|---------|---------------------------|-----------|---------|
|           | Not-Overweigh           | Overweigh | Obese   | Not-Overweigh             | Overweigh | Obese   |
| 0-4       | 0.77698                 | 0.17266   | 0.05036 | 0.77344                   | 0.17188   | 0.05469 |
| 5-9       | 0.82456                 | 0.15789   | 0.01754 | 0.91071                   | 0.03571   | 0.05357 |
| 10-14     | 0.90476                 | 0.09524   | 0.00000 | 0.83333                   | 0.14583   | 0.02083 |
| 15-19     | 0.96296                 | 0.01852   | 0.01852 | 0.86885                   | 0.11475   | 0.01639 |
| 20-24     | 0.80392                 | 0.17647   | 0.01961 | 0.68182                   | 0.28409   | 0.03409 |
| 25-29     | 0.78049                 | 0.14634   | 0.07317 | 0.63542                   | 0.27083   | 0.09375 |
| 30-34     | 0.57447                 | 0.40426   | 0.02128 | 0.51429                   | 0.42857   | 0.05714 |
| 35-39     | 0.58974                 | 0.38462   | 0.02564 | 0.50000                   | 0.35294   | 0.14706 |
| 40-44     | 0.67442                 | 0.23256   | 0.09302 | 0.40278                   | 0.37500   | 0.22222 |
| 45-49     | 0.60000                 | 0.30000   | 0.10000 | 0.28889                   | 0.46667   | 0.24444 |
| 50-54     | 0.55556                 | 0.27778   | 0.16667 | 0.40909                   | 0.34091   | 0.25000 |
| 55-59     | 0.62963                 | 0.25926   | 0.11111 | 0.31707                   | 0.41463   | 0.26829 |

**Table 31. Prevalent rates of middle socioeconomic status population by age group, gender, and body mass index category in 2005 (Oriental region)**

| Age Group | Nutritional State Males |           |         | Nutritional State Females |           |         |
|-----------|-------------------------|-----------|---------|---------------------------|-----------|---------|
|           | Not-Overweigh           | Overweigh | Obese   | Not-Overweigh             | Overweigh | Obese   |
| 0-4       | 0.72826                 | 0.18478   | 0.08696 | 0.81215                   | 0.17127   | 0.01657 |
| 5-9       | 0.84337                 | 0.09639   | 0.06024 | 0.85897                   | 0.11538   | 0.02564 |
| 10-14     | 0.76667                 | 0.15556   | 0.07778 | 0.90588                   | 0.09412   | 0.00000 |
| 15-19     | 0.90123                 | 0.08642   | 0.01235 | 0.83333                   | 0.11765   | 0.04902 |
| 20-24     | 0.76596                 | 0.22340   | 0.01064 | 0.68047                   | 0.23669   | 0.08284 |
| 25-29     | 0.57143                 | 0.30952   | 0.11905 | 0.62000                   | 0.32667   | 0.05333 |
| 30-34     | 0.53425                 | 0.31507   | 0.15068 | 0.41606                   | 0.40146   | 0.18248 |
| 35-39     | 0.47761                 | 0.38806   | 0.13433 | 0.41830                   | 0.41176   | 0.16993 |
| 40-44     | 0.39189                 | 0.43243   | 0.17568 | 0.39394                   | 0.37374   | 0.23232 |
| 45-49     | 0.38182                 | 0.54545   | 0.07273 | 0.28814                   | 0.39831   | 0.31356 |
| 50-54     | 0.48000                 | 0.38000   | 0.14000 | 0.32051                   | 0.35897   | 0.32051 |
| 55-59     | 0.38462                 | 0.43590   | 0.17949 | 0.33333                   | 0.46032   | 0.20635 |

**Table 32. Prevalent rates of higher socioeconomic status population by age group, gender, and body mass index category in 2005 (Oriental region)**

| Age Group | Nutritional State Males |           |         | Nutritional State Females |           |         |
|-----------|-------------------------|-----------|---------|---------------------------|-----------|---------|
|           | Not-Overweigh           | Overweigh | Obese   | Not-Overweigh             | Overweigh | Obese   |
| 0-4       | 0.69903                 | 0.21845   | 0.08252 | 0.71359                   | 0.22816   | 0.05825 |
| 5-9       | 0.70992                 | 0.19847   | 0.09160 | 0.78788                   | 0.15152   | 0.06061 |
| 10-14     | 0.80315                 | 0.10236   | 0.09449 | 0.75817                   | 0.20261   | 0.03922 |
| 15-19     | 0.91200                 | 0.07200   | 0.01600 | 0.81921                   | 0.15254   | 0.02825 |
| 20-24     | 0.70690                 | 0.21839   | 0.07471 | 0.76557                   | 0.20513   | 0.02930 |
| 25-29     | 0.53333                 | 0.37778   | 0.08889 | 0.61925                   | 0.28870   | 0.09205 |
| 30-34     | 0.48387                 | 0.38710   | 0.12903 | 0.51073                   | 0.33906   | 0.15021 |
| 35-39     | 0.34400                 | 0.47200   | 0.18400 | 0.50000                   | 0.33071   | 0.16929 |
| 40-44     | 0.35593                 | 0.49153   | 0.15254 | 0.34855                   | 0.38174   | 0.26971 |
| 45-49     | 0.29412                 | 0.43137   | 0.27451 | 0.24336                   | 0.51327   | 0.24336 |
| 50-54     | 0.29167                 | 0.47917   | 0.22917 | 0.21978                   | 0.48901   | 0.29121 |

|       |         |         |         |         |         |         |
|-------|---------|---------|---------|---------|---------|---------|
| 55-59 | 0.32000 | 0.45333 | 0.22667 | 0.18254 | 0.44444 | 0.37302 |
|-------|---------|---------|---------|---------|---------|---------|

**Table 33. Prevalent rates of entire population by age group, gender, and body mass index category in 2010 (Oriental region)**

| Age Group | Nutritional State Males |           |         | Nutritional State Females |           |         |
|-----------|-------------------------|-----------|---------|---------------------------|-----------|---------|
|           | Not-Overweigh           | Overweigh | Obese   | Not-Overweigh             | Overweigh | Obese   |
| 0-4       | 0.75081                 | 0.19094   | 0.05825 | 0.79614                   | 0.16164   | 0.04222 |
| 5-9       | 0.75282                 | 0.16027   | 0.08691 | 0.81051                   | 0.14020   | 0.04929 |
| 10-14     | 0.75161                 | 0.16022   | 0.08817 | 0.78909                   | 0.16579   | 0.04512 |
| 15-19     | 0.83222                 | 0.12650   | 0.04128 | 0.78791                   | 0.16484   | 0.04725 |
| 20-24     | 0.71358                 | 0.21358   | 0.07285 | 0.68146                   | 0.23238   | 0.08616 |
| 25-29     | 0.51866                 | 0.34774   | 0.13360 | 0.60227                   | 0.26278   | 0.13494 |
| 30-34     | 0.45244                 | 0.35267   | 0.19490 | 0.47287                   | 0.35349   | 0.17364 |
| 35-39     | 0.41534                 | 0.40476   | 0.17989 | 0.39840                   | 0.40320   | 0.19840 |
| 40-44     | 0.37907                 | 0.43488   | 0.18605 | 0.35229                   | 0.40284   | 0.24487 |
| 45-49     | 0.34933                 | 0.47200   | 0.17867 | 0.30017                   | 0.41791   | 0.28192 |
| 50-54     | 0.34074                 | 0.45556   | 0.20370 | 0.21649                   | 0.43299   | 0.35052 |
| 55-59     | 0.36444                 | 0.42222   | 0.21333 | 0.23656                   | 0.43548   | 0.32796 |

**Table 34. Prevalent rates of lower socioeconomic status population by age group, gender, and body mass index category in 2010 (Oriental region)**

| Age Group | Nutritional State Males |           |         | Nutritional State Females |           |         |
|-----------|-------------------------|-----------|---------|---------------------------|-----------|---------|
|           | Not-Overweigh           | Overweigh | Obese   | Not-Overweigh             | Overweigh | Obese   |
| 0-4       | 0.78523                 | 0.16779   | 0.04698 | 0.81818                   | 0.14015   | 0.04167 |
| 5-9       | 0.81028                 | 0.13834   | 0.05138 | 0.87405                   | 0.09542   | 0.03053 |
| 10-14     | 0.85366                 | 0.12602   | 0.02033 | 0.86000                   | 0.10800   | 0.03200 |
| 15-19     | 0.91358                 | 0.08025   | 0.00617 | 0.81780                   | 0.13983   | 0.04237 |
| 20-24     | 0.81944                 | 0.11111   | 0.06944 | 0.66489                   | 0.25532   | 0.07979 |
| 25-29     | 0.56552                 | 0.35862   | 0.07586 | 0.59551                   | 0.25281   | 0.15169 |
| 30-34     | 0.57143                 | 0.29524   | 0.13333 | 0.45070                   | 0.35915   | 0.19014 |
| 35-39     | 0.56180                 | 0.33708   | 0.10112 | 0.44262                   | 0.37705   | 0.18033 |
| 40-44     | 0.47222                 | 0.38889   | 0.13889 | 0.40909                   | 0.35606   | 0.23485 |
| 45-49     | 0.53012                 | 0.42169   | 0.04819 | 0.39000                   | 0.35000   | 0.26000 |
| 50-54     | 0.59259                 | 0.37037   | 0.03704 | 0.25882                   | 0.42353   | 0.31765 |
| 55-59     | 0.56098                 | 0.39024   | 0.04878 | 0.30000                   | 0.41667   | 0.28333 |

**Table 35. Prevalent rates of middle socioeconomic status population by age group, gender, and body mass index category in 2010 (Oriental region)**

| Age Group | Nutritional State Males |           |         | Nutritional State Females |           |         |
|-----------|-------------------------|-----------|---------|---------------------------|-----------|---------|
|           | Not-Overweigh           | Overweigh | Obese   | Not-Overweigh             | Overweigh | Obese   |
| 0-4       | 0.74843                 | 0.19497   | 0.05660 | 0.77528                   | 0.19101   | 0.03371 |
| 5-9       | 0.80132                 | 0.12914   | 0.06954 | 0.78041                   | 0.16892   | 0.05068 |
| 10-14     | 0.76923                 | 0.15050   | 0.08027 | 0.77852                   | 0.18456   | 0.03691 |
| 15-19     | 0.82258                 | 0.12903   | 0.04839 | 0.80077                   | 0.14943   | 0.04981 |
| 20-24     | 0.75342                 | 0.19178   | 0.05479 | 0.66288                   | 0.26136   | 0.07576 |
| 25-29     | 0.54545                 | 0.33117   | 0.12338 | 0.61927                   | 0.26606   | 0.11468 |
| 30-34     | 0.46203                 | 0.35443   | 0.18354 | 0.53589                   | 0.31579   | 0.14833 |

|       |         |         |         |         |         |         |
|-------|---------|---------|---------|---------|---------|---------|
| 35-39 | 0.39716 | 0.43972 | 0.16312 | 0.39524 | 0.35238 | 0.25238 |
| 40-44 | 0.46400 | 0.36000 | 0.17600 | 0.37173 | 0.40314 | 0.22513 |
| 45-49 | 0.32759 | 0.52586 | 0.14655 | 0.30952 | 0.39524 | 0.29524 |
| 50-54 | 0.33333 | 0.44444 | 0.22222 | 0.19084 | 0.39695 | 0.41221 |
| 55-59 | 0.30357 | 0.50000 | 0.19643 | 0.26667 | 0.40000 | 0.33333 |

**Table 36. Prevalent rates of higher socioeconomic status population by age group, gender, and body mass index category in 2010 (Oriental region)**

| Age Group | Nutritional State Males |           |         | Nutritional State Females |           |         |
|-----------|-------------------------|-----------|---------|---------------------------|-----------|---------|
|           | Not-Overweigh           | Overweigh | Obese   | Not-Overweigh             | Overweigh | Obese   |
| 0-4       | 0.72026                 | 0.20900   | 0.07074 | 0.79530                   | 0.15436   | 0.05034 |
| 5-9       | 0.66465                 | 0.20544   | 0.12991 | 0.78873                   | 0.14930   | 0.06197 |
| 10-14     | 0.67273                 | 0.18961   | 0.13766 | 0.75309                   | 0.18765   | 0.05926 |
| 15-19     | 0.80059                 | 0.14663   | 0.05279 | 0.76271                   | 0.18886   | 0.04843 |
| 20-24     | 0.61411                 | 0.29461   | 0.09129 | 0.70701                   | 0.19427   | 0.09873 |
| 25-29     | 0.46667                 | 0.35238   | 0.18095 | 0.59416                   | 0.26623   | 0.13961 |
| 30-34     | 0.36905                 | 0.38690   | 0.24405 | 0.43878                   | 0.37755   | 0.18367 |
| 35-39     | 0.34459                 | 0.41216   | 0.24324 | 0.38225                   | 0.45051   | 0.16724 |
| 40-44     | 0.30472                 | 0.48927   | 0.20601 | 0.31613                   | 0.42258   | 0.26129 |
| 45-49     | 0.27841                 | 0.46023   | 0.26136 | 0.26280                   | 0.45734   | 0.27986 |
| 50-54     | 0.25000                 | 0.49306   | 0.25694 | 0.21561                   | 0.45353   | 0.33086 |
| 55-59     | 0.32813                 | 0.39844   | 0.27344 | 0.20290                   | 0.45894   | 0.33816 |

**Table 37. Fraction of births for men by body mass index category and socioeconomic status (Oriental region)<sup>†</sup>**

| Population group | Lower SES (%/year) | Middle SES (%/year) | Higher SES (%/year) | Complete Urban Population (%/year) |
|------------------|--------------------|---------------------|---------------------|------------------------------------|
| Not- overweight  | 84,62%             | 76,92%              | 72,22%              | 77,23%                             |
| Overweight       | 7,69%              | 7,69%               | 22,22%              | 12,87%                             |
| Obese            | 7,69%              | 15,38%              | 5,56%               | 9,90%                              |

<sup>†</sup> The fractions of births by each BMI category correspond to the prevalences by BMI category of children aged 0 to 12 months

**Table 38. Fraction of births for women by body mass index category and socioeconomic status (Oriental region)<sup>†</sup>**

| Population group | Lower SES (%/year) | Middle SES (%/year) | Higher SES (%/year) | Complete Urban Population (%/year) |
|------------------|--------------------|---------------------|---------------------|------------------------------------|
| Not- overweight  | 83,33%             | 84,85%              | 69,44%              | 78,49%                             |
| Overweight       | 8,33%              | 15,15%              | 27,78%              | 18,28%                             |
| Obese            | 8,33%              | 0,00%               | 2,78%               | 3,23%                              |

<sup>†</sup> The fractions of births by each BMI category correspond to the prevalences by BMI category of children aged 0 to 12 months

**Table 39. Mortality rates for men and population size by age group without segregate by socioeconomic status (Oriental region)<sup>†</sup>**

| Age group | Mortality rates (R) (%/year) | Not- overweight men in 2005 (Number of people) <sup>1</sup> | Overweight men in 2005 (Number of people) <sup>2</sup> | Obese men in 2005 (Number of people) <sup>3</sup> |
|-----------|------------------------------|-------------------------------------------------------------|--------------------------------------------------------|---------------------------------------------------|
| 0-4       | 0,00339                      | 176247                                                      | 47030                                                  | 18264                                             |
| 5-9       | 0,00029                      | 197520                                                      | 40445                                                  | 16930                                             |
| 10-14     | 0,00035                      | 210874                                                      | 31278                                                  | 19170                                             |
| 15-19     | 0,00119                      | 228039                                                      | 16220                                                  | 3817                                              |
| 20-24     | 0,00239                      | 159170                                                      | 45862                                                  | 10117                                             |
| 25-29     | 0,00273                      | 111185                                                      | 60713                                                  | 18287                                             |
| 30-34     | 0,00293                      | 86676                                                       | 61911                                                  | 19261                                             |
| 35-39     | 0,00283                      | 71920                                                       | 73388                                                  | 24218                                             |
| 40-44     | 0,00288                      | 68349                                                       | 68349                                                  | 23922                                             |
| 45-49     | 0,00380                      | 46710                                                       | 59314                                                  | 25209                                             |
| 50-54     | 0,00630                      | 39542                                                       | 44644                                                  | 20409                                             |
| 55-59     | 0,00831                      | 32484                                                       | 33644                                                  | 15662                                             |

†Values used in this table are for the urban population

<sup>1</sup> Initial value used in the stock of not-overweight population in 2005.

<sup>2</sup> Initial value used in the stock of overweight population in 2005.

<sup>3</sup> Initial value used in the stock of obese population in 2005.

**Table 40. Mortality rates for women and population size by age group without segregate by socioeconomic status (Oriental region)<sup>†</sup>**

| Age group | Mortality rates (R) (%/year) | Not- overweight men in 2005 (Number of people) <sup>1</sup> | Overweight men in 2005 (Number of people) <sup>2</sup> | Obese men in 2005 (Number of people) <sup>3</sup> |
|-----------|------------------------------|-------------------------------------------------------------|--------------------------------------------------------|---------------------------------------------------|
| 0-4       | 0,00279                      | 177602                                                      | 45191                                                  | 9942                                              |
| 5-9       | 0,00025                      | 206793                                                      | 28877                                                  | 12110                                             |
| 10-14     | 0,00022                      | 208082                                                      | 41081                                                  | 6251                                              |
| 15-19     | 0,00048                      | 209006                                                      | 33973                                                  | 8124                                              |
| 20-24     | 0,00057                      | 164005                                                      | 51679                                                  | 10677                                             |
| 25-29     | 0,00062                      | 127221                                                      | 60662                                                  | 16429                                             |
| 30-34     | 0,00074                      | 90686                                                       | 70153                                                  | 27377                                             |
| 35-39     | 0,00093                      | 92379                                                       | 70208                                                  | 32435                                             |
| 40-44     | 0,00157                      | 67232                                                       | 69001                                                  | 46001                                             |
| 45-49     | 0,00211                      | 39405                                                       | 71084                                                  | 39791                                             |
| 50-54     | 0,00362                      | 32546                                                       | 51761                                                  | 34899                                             |
| 55-59     | 0,00537                      | 23408                                                       | 41889                                                  | 29158                                             |

†Values used in this table are for the urban population

<sup>1</sup> Initial value used in the stock of not-overweight population in 2005.

<sup>2</sup> Initial value used in the stock of overweight population in 2005.

<sup>3</sup> Initial value used in the stock of obese population in 2005.

**Table 41. Man mortality rates and population size by age group for the lower socioeconomic status population (Oriental region)<sup>†</sup>**

| Age group | Mortality rates (R) (%/year) | Not- overweight men in 2005 (Number of people) <sup>1</sup> | Overweight men in 2005 (Number of people) <sup>2</sup> | Obese men in 2005 (Number of people) <sup>3</sup> |
|-----------|------------------------------|-------------------------------------------------------------|--------------------------------------------------------|---------------------------------------------------|
| 0-4       | 0,00339                      | 49313                                                       | 10958                                                  | 3196                                              |
| 5-9       | 0,00029                      | 44207                                                       | 8465                                                   | 941                                               |
| 10-14     | 0,00035                      | 38341                                                       | 4036                                                   | 0                                                 |
| 15-19     | 0,00119                      | 49615                                                       | 954                                                    | 954                                               |
| 20-24     | 0,00239                      | 27652                                                       | 6070                                                   | 674                                               |
| 25-29     | 0,00273                      | 23407                                                       | 4389                                                   | 2194                                              |
| 30-34     | 0,00293                      | 18573                                                       | 13070                                                  | 688                                               |
| 35-39     | 0,00283                      | 16879                                                       | 11008                                                  | 734                                               |

|       |         |       |      |      |
|-------|---------|-------|------|------|
| 40-44 | 0,00288 | 19821 | 6835 | 2734 |
| 45-49 | 0,00380 | 8897  | 4449 | 1483 |
| 50-54 | 0,00630 | 6378  | 3189 | 1913 |
| 55-59 | 0,00831 | 9861  | 4060 | 1740 |

†Values used in this table are for the urban population

<sup>1</sup> Initial value used in the stock of not-overweight population in 2005 for lower SES.

<sup>2</sup> Initial value used in the stock of overweight population in 2005 for lower SES.

<sup>3</sup> Initial value used in the stock of obese population in 2005 for lower SES.

**Table 42. Women mortality rates and population size by age group for the lower socioeconomic status population (Oriental region) †**

| Age group | Mortality rates (R) (%/year) | Not- overweight women in 2005 (Number of people) <sup>1</sup> | Overweight women in 2005 (Number of people) <sup>2</sup> | Obese women in 2005 (Number of people) <sup>3</sup> |
|-----------|------------------------------|---------------------------------------------------------------|----------------------------------------------------------|-----------------------------------------------------|
| 0-4       | 0,00279                      | 44740                                                         | 9942                                                     | 3163                                                |
| 5-9       | 0,00025                      | 47506                                                         | 1863                                                     | 2794                                                |
| 10-14     | 0,00022                      | 35722                                                         | 6251                                                     | 893                                                 |
| 15-19     | 0,00048                      | 39143                                                         | 5170                                                     | 739                                                 |
| 20-24     | 0,00057                      | 25626                                                         | 10677                                                    | 1281                                                |
| 25-29     | 0,00062                      | 25697                                                         | 10953                                                    | 3791                                                |
| 30-34     | 0,00074                      | 15399                                                         | 12833                                                    | 1711                                                |
| 35-39     | 0,00093                      | 13959                                                         | 9854                                                     | 4106                                                |
| 40-44     | 0,00157                      | 12827                                                         | 11943                                                    | 7077                                                |
| 45-49     | 0,00211                      | 5022                                                          | 8113                                                     | 4250                                                |
| 50-54     | 0,00362                      | 7058                                                          | 5882                                                     | 4313                                                |
| 55-59     | 0,00537                      | 5339                                                          | 6981                                                     | 4517                                                |

†Values used in this table are for the urban population

<sup>1</sup> Initial value used in the stock of not-overweight population in 2005 for lower SES.

<sup>2</sup> Initial value used in the stock of overweight population in 2005 for lower SES.

<sup>3</sup> Initial value used in the stock of obese population in 2005 for lower SES.

**Table 43. Man mortality rates and population size by age group for the middle socioeconomic status population (Oriental region) †**

| Age group | Mortality rates (R) (%/year) | Not- overweight men in 2005 (Number of people) <sup>1</sup> | Overweight men in 2005 (Number of people) <sup>2</sup> | Obese men in 2005 (Number of people) <sup>3</sup> |
|-----------|------------------------------|-------------------------------------------------------------|--------------------------------------------------------|---------------------------------------------------|
| 0-4       | 0,00339                      | 61184                                                       | 15524                                                  | 7306                                              |
| 5-9       | 0,00029                      | 65840                                                       | 7525                                                   | 4703                                              |
| 10-14     | 0,00035                      | 69619                                                       | 14126                                                  | 7063                                              |
| 15-19     | 0,00119                      | 69652                                                       | 6679                                                   | 954                                               |
| 20-24     | 0,00239                      | 48560                                                       | 14163                                                  | 674                                               |
| 25-29     | 0,00273                      | 35111                                                       | 19019                                                  | 7315                                              |
| 30-34     | 0,00293                      | 26828                                                       | 15822                                                  | 7567                                              |
| 35-39     | 0,00283                      | 23484                                                       | 19081                                                  | 6605                                              |
| 40-44     | 0,00288                      | 19821                                                       | 21872                                                  | 8885                                              |
| 45-49     | 0,00380                      | 15570                                                       | 22243                                                  | 2966                                              |
| 50-54     | 0,00630                      | 15307                                                       | 12118                                                  | 4464                                              |
| 55-59     | 0,00831                      | 8701                                                        | 9861                                                   | 4060                                              |

†Values used in this table are for the urban population

<sup>1</sup> Initial value used in the stock of not-overweight population in 2005 for middle SES.

<sup>2</sup> Initial value used in the stock of overweight population in 2005 for middle SES.

<sup>3</sup> Initial value used in the stock of obese population in 2005 for middle SES.

**Table 44. Women mortality rates and population size by age group for the middle socioeconomic status population (Oriental region) †**

| Age group | Mortality rates (R) (%/year) | Not- overweight women in 2005 (Number of people) <sup>1</sup> | Overweight women in 2005 (Number of people) <sup>2</sup> | Obese women in 2005 (Number of people) <sup>3</sup> |
|-----------|------------------------------|---------------------------------------------------------------|----------------------------------------------------------|-----------------------------------------------------|
| 0-4       | 0,00279                      | 66431                                                         | 14009                                                    | 1356                                                |
| 5-9       | 0,00025                      | 62410                                                         | 8383                                                     | 1863                                                |
| 10-14     | 0,00022                      | 68765                                                         | 7144                                                     | 0                                                   |
| 15-19     | 0,00048                      | 62776                                                         | 8862                                                     | 3693                                                |
| 20-24     | 0,00057                      | 49116                                                         | 17084                                                    | 5979                                                |
| 25-29     | 0,00062                      | 39177                                                         | 20642                                                    | 3370                                                |
| 30-34     | 0,00074                      | 24383                                                         | 23527                                                    | 10694                                               |
| 35-39     | 0,00093                      | 26277                                                         | 25866                                                    | 10675                                               |
| 40-44     | 0,00157                      | 17250                                                         | 16366                                                    | 10173                                               |
| 45-49     | 0,00211                      | 13135                                                         | 18157                                                    | 14294                                               |
| 50-54     | 0,00362                      | 9803                                                          | 10980                                                    | 9803                                                |
| 55-59     | 0,00537                      | 8624                                                          | 11910                                                    | 5339                                                |

†Values used in this table are for the urban population

<sup>1</sup> Initial value used in the stock of not-overweight population in 2005 for middle SES.

<sup>2</sup> Initial value used in the stock of overweight population in 2005 for middle SES.

<sup>3</sup> Initial value used in the stock of obese population in 2005 for middle SES.

**Table 45. Man mortality rates and population size by age group for the higher socioeconomic status population (Oriental region) †**

| Age group | Mortality rates (R) (%/year) | Not- overweight men in 2005 (Number of people) <sup>1</sup> | Overweight men in 2005 (Number of people) <sup>2</sup> | Obese men in 2005 (Number of people) <sup>3</sup> |
|-----------|------------------------------|-------------------------------------------------------------|--------------------------------------------------------|---------------------------------------------------|
| 0-4       | 0,00339                      | 65750                                                       | 20547                                                  | 7762                                              |
| 5-9       | 0,00029                      | 87473                                                       | 24455                                                  | 11287                                             |
| 10-14     | 0,00035                      | 102914                                                      | 13117                                                  | 12108                                             |
| 15-19     | 0,00119                      | 108772                                                      | 8587                                                   | 1908                                              |
| 20-24     | 0,00239                      | 82957                                                       | 25629                                                  | 8768                                              |
| 25-29     | 0,00273                      | 52667                                                       | 37306                                                  | 8778                                              |
| 30-34     | 0,00293                      | 41274                                                       | 33019                                                  | 11006                                             |
| 35-39     | 0,00283                      | 31557                                                       | 43299                                                  | 16879                                             |
| 40-44     | 0,00288                      | 28707                                                       | 39642                                                  | 12303                                             |
| 45-49     | 0,00380                      | 22243                                                       | 32623                                                  | 20760                                             |
| 50-54     | 0,00630                      | 17858                                                       | 29338                                                  | 14031                                             |
| 55-59     | 0,00831                      | 13922                                                       | 19722                                                  | 9861                                              |

†Values used in this table are for the urban population

<sup>1</sup> Initial value used in the stock of not-overweight population in 2005 for higher SES.

<sup>2</sup> Initial value used in the stock of overweight population in 2005 for higher SES.

<sup>3</sup> Initial value used in the stock of obese population in 2005 for higher SES.

**Table 46. Women mortality rates and population size by age group for the higher socioeconomic status population (Oriental region) †**

| Age group | Mortality rates (R) (%/year) | Not- overweight women in 2005 (Number of people) <sup>1</sup> | Overweight women in 2005 (Number of people) <sup>2</sup> | Obese women in 2005 (Number of people) <sup>3</sup> |
|-----------|------------------------------|---------------------------------------------------------------|----------------------------------------------------------|-----------------------------------------------------|
| 0-4       | 0,00279                      | 66431                                                         | 21240                                                    | 5423                                                |
| 5-9       | 0,00025                      | 96876                                                         | 18630                                                    | 7452                                                |
| 10-14     | 0,00022                      | 103594                                                        | 27685                                                    | 5358                                                |
| 15-19     | 0,00048                      | 107088                                                        | 19941                                                    | 3693                                                |
| 20-24     | 0,00057                      | 89263                                                         | 23917                                                    | 3417                                                |
| 25-29     | 0,00062                      | 62347                                                         | 29067                                                    | 9268                                                |

|              |         |       |       |       |
|--------------|---------|-------|-------|-------|
| <b>30-34</b> | 0,00074 | 50904 | 33793 | 14972 |
| <b>35-39</b> | 0,00093 | 52143 | 34488 | 17655 |
| <b>40-44</b> | 0,00157 | 37155 | 40693 | 28751 |
| <b>45-49</b> | 0,00211 | 21248 | 44814 | 21248 |
| <b>50-54</b> | 0,00362 | 15685 | 34899 | 20783 |
| <b>55-59</b> | 0,00537 | 9445  | 22998 | 19302 |

†Values used in this table are for the urban population

<sup>1</sup> Initial value used in the stock of not-overweight population in 2005 for higher SES.

<sup>2</sup> Initial value used in the stock of overweight population in 2005 for higher SES.

<sup>3</sup> Initial value used in the stock of obese population in 2005 for higher SES.

**Table 47. Data and projections of the Fertility rates by department and Region (Oriental region)†**

| Year | Fecundity Rate Dept 15 | Fecundity Rate Depto 25 | Fecundity Rate Depto 50 | Fecundity Rate Depto 54 | Fecundity Rate Depto 68 | Region Average Fecundity Rate |
|------|------------------------|-------------------------|-------------------------|-------------------------|-------------------------|-------------------------------|
| 2005 | 2,8421                 | 2,6459                  | 2,7668                  | 2,7249                  | 2,2912                  | 1,659                         |
| 2006 | 2,7964                 | 2,5891                  | 2,7232                  | 2,6726                  | 2,2568                  | 1,630                         |
| 2007 | 2,7507                 | 2,5323                  | 2,6796                  | 2,6203                  | 2,2224                  | 1,601                         |
| 2008 | 2,705                  | 2,4755                  | 2,636                   | 2,568                   | 2,188                   | 1,572                         |
| 2009 | 2,6708                 | 2,4432                  | 2,6051                  | 2,5373                  | 2,172                   | 1,554                         |
| 2010 | 2,6366                 | 2,4109                  | 2,5742                  | 2,5066                  | 2,156                   | 1,536                         |
| 2011 | 2,6024                 | 2,3786                  | 2,5433                  | 2,4759                  | 2,14                    | 1,518                         |
| 2012 | 2,5682                 | 2,3463                  | 2,5124                  | 2,4452                  | 2,124                   | 1,500                         |
| 2013 | 2,534                  | 2,314                   | 2,4815                  | 2,4145                  | 2,108                   | 1,482                         |
| 2014 | 2,514                  | 2,2986                  | 2,4623                  | 2,3983                  | 2,1014                  | 1,472                         |
| 2015 | 2,494                  | 2,2832                  | 2,4431                  | 2,3821                  | 2,0948                  | 1,462                         |
| 2016 | 2,474                  | 2,2678                  | 2,4239                  | 2,3659                  | 2,0882                  | 1,452                         |
| 2017 | 2,454                  | 2,2524                  | 2,4047                  | 2,3497                  | 2,0816                  | 1,443                         |
| 2018 | 2,434                  | 2,237                   | 2,3855                  | 2,3335                  | 2,075                   | 1,433                         |
| 2019 | 2,414                  | 2,2216                  | 2,3663                  | 2,3173                  | 2,0684                  | 1,423                         |
| 2020 | 2,394                  | 2,2062                  | 2,3471                  | 2,3011                  | 2,0618                  | 1,414                         |
| 2021 | 2,374                  | 2,1908                  | 2,3279                  | 2,2849                  | 2,0552                  | 1,404                         |
| 2022 | 2,354                  | 2,1754                  | 2,3087                  | 2,2687                  | 2,0486                  | 1,394                         |
| 2023 | 2,334                  | 2,16                    | 2,2895                  | 2,2525                  | 2,042                   | 1,385                         |
| 2024 | 2,314                  | 2,1446                  | 2,2703                  | 2,2363                  | 2,0354                  | 1,375                         |
| 2025 | 2,294                  | 2,1292                  | 2,2511                  | 2,2201                  | 2,0288                  | 1,365                         |
| 2026 | 2,274                  | 2,1138                  | 2,2319                  | 2,2039                  | 2,0222                  | 1,356                         |
| 2027 | 2,254                  | 2,0984                  | 2,2127                  | 2,1877                  | 2,0156                  | 1,346                         |
| 2028 | 2,234                  | 2,083                   | 2,1935                  | 2,1715                  | 2,009                   | 1,336                         |
| 2029 | 2,214                  | 2,0676                  | 2,1743                  | 2,1553                  | 2,0024                  | 1,327                         |
| 2030 | 2,194                  | 2,0522                  | 2,1551                  | 2,1391                  | 1,9958                  | 1,317                         |

† Data of Fertility rate of DANE [1] was used to forecast the department's fertility rate from 2005 to 2030. Holt-Winters no seasonal method in EViews 5 (Quantitative Micro Software, LLC) was used to forecast the fertility rate. In the SD model we used data from 2005 to 2030 and the region fertility rate was calculated as the average



of all departments' fertility rates.

**Table 48. Fraction of births by departments, body mass index category, and socioeconomic status (Oriental region) †**

| Population group |                | Lower SES<br>(%/year) | Middle SES<br>(%/year) | Higher SES<br>(%/year) | Complete<br>Urban<br>Population<br>(%/year) |
|------------------|----------------|-----------------------|------------------------|------------------------|---------------------------------------------|
| Department<br>15 | Not-overweight | 80,00%                | 71,43%                 | 77,78%                 | 76,92%                                      |
|                  | Overweight     | 0,00%                 | 14,29%                 | 11,11%                 | 7,69%                                       |
|                  | Obese          | 20,00%                | 14,29%                 | 11,11%                 | 15,38%                                      |
| Department<br>25 | Not-overweight | 71,43%                | 66,67%                 | 57,14%                 | 63,33%                                      |
|                  | Overweight     | 28,57%                | 33,33%                 | 28,57%                 | 30,00%                                      |
|                  | Obese          | 0,00%                 | 0,00%                  | 14,29%                 | 6,67%                                       |
| Department<br>50 | Not-overweight | 93,33%                | 83,33%                 | 65,00%                 | 79,25%                                      |
|                  | Overweight     | 6,67%                 | 5,56%                  | 30,00%                 | 15,09%                                      |
|                  | Obese          | 0,00%                 | 11,11%                 | 5,00%                  | 5,66%                                       |
| Department<br>54 | Not-overweight | 76,47%                | 88,89%                 | 77,78%                 | 82,26%                                      |
|                  | Overweight     | 17,65%                | 3,70%                  | 22,22%                 | 12,90%                                      |
|                  | Obese          | 5,88%                 | 7,41%                  | 0,00%                  | 4,84%                                       |
| Department<br>68 | Not-overweight | 82,14%                | 73,68%                 | 72,50%                 | 76,87%                                      |
|                  | Overweight     | 16,07%                | 18,42%                 | 25,00%                 | 19,40%                                      |
|                  | Obese          | 1,79%                 | 7,89%                  | 2,50%                  | 3,73%                                       |

† The fractions of births by each BMI category correspond to the prevalences by BMI category of children aged 0 to 12 months

**Table 49. Prevalent rates of entire population by age group, and body mass index category (Oriental region)**

| Departments      | Age group | Not- overweight<br>in 2005 | Overweight<br>in 2005 | Obese in<br>2005 | Not- overweight<br>in 2010 | Overweight<br>in 2010 | Obese in<br>2010 |
|------------------|-----------|----------------------------|-----------------------|------------------|----------------------------|-----------------------|------------------|
| Department<br>15 | 0-4       | 0.76978                    | 0.13669               | 0.09353          | 0.69362                    | 0.23404               | 0.07234          |
|                  | 5-9       | 0.80000                    | 0.20000               | 0.00000          | 0.80000                    | 0.15094               | 0.04906          |
|                  | 10-14     | 0.82667                    | 0.13333               | 0.04000          | 0.78623                    | 0.17391               | 0.03986          |
|                  | 15-19     | 0.86842                    | 0.10526               | 0.02632          | 0.82533                    | 0.14410               | 0.03057          |
|                  | 20-24     | 0.80000                    | 0.16471               | 0.03529          | 0.70000                    | 0.24706               | 0.05294          |
|                  | 25-29     | 0.70238                    | 0.23810               | 0.05952          | 0.60759                    | 0.29114               | 0.10127          |
|                  | 30-34     | 0.47436                    | 0.42308               | 0.10256          | 0.46099                    | 0.32624               | 0.21277          |
|                  | 35-39     | 0.47297                    | 0.40541               | 0.12162          | 0.45255                    | 0.36496               | 0.18248          |
|                  | 40-44     | 0.38889                    | 0.41667               | 0.19444          | 0.33333                    | 0.42963               | 0.23704          |
|                  | 45-49     | 0.26667                    | 0.41667               | 0.31667          | 0.32283                    | 0.45669               | 0.22047          |
|                  | 50-54     | 0.20000                    | 0.52000               | 0.28000          | 0.18349                    | 0.53211               | 0.28440          |
| 55-59            | 0.20755   | 0.50943                    | 0.28302               | 0.16438          | 0.53425                    | 0.30137               |                  |
| Department<br>25 | 0-4       | 0.73295                    | 0.20455               | 0.06250          | 0.70070                    | 0.25000               | 0.04930          |
|                  | 5-9       | 0.75556                    | 0.15556               | 0.08889          | 0.74257                    | 0.20792               | 0.04950          |
|                  | 10-14     | 0.75862                    | 0.18391               | 0.05747          | 0.81056                    | 0.14907               | 0.04037          |

| Departments   | Age group | Not- overweight in 2005 | Overweight in 2005 | Obese in 2005 | Not- overweight in 2010 | Overweight in 2010 | Obese in 2010 |
|---------------|-----------|-------------------------|--------------------|---------------|-------------------------|--------------------|---------------|
|               | 15-19     | 0.86585                 | 0.12195            | 0.01220       | 0.83883                 | 0.12454            | 0.03663       |
|               | 20-24     | 0.67939                 | 0.27481            | 0.04580       | 0.72381                 | 0.20476            | 0.07143       |
|               | 25-29     | 0.53175                 | 0.36508            | 0.10317       | 0.59694                 | 0.30102            | 0.10204       |
|               | 30-34     | 0.53659                 | 0.30894            | 0.15447       | 0.49045                 | 0.33758            | 0.17197       |
|               | 35-39     | 0.43119                 | 0.34862            | 0.22018       | 0.36054                 | 0.43537            | 0.20408       |
|               | 40-44     | 0.37037                 | 0.33333            | 0.29630       | 0.34091                 | 0.45455            | 0.20455       |
|               | 45-49     | 0.25581                 | 0.51163            | 0.23256       | 0.28571                 | 0.46429            | 0.25000       |
|               | 50-54     | 0.23881                 | 0.47761            | 0.28358       | 0.21014                 | 0.49275            | 0.29710       |
|               | 55-59     | 0.30303                 | 0.43939            | 0.25758       | 0.23750                 | 0.42500            | 0.33750       |
| Department 50 | 0-4       | 0.74545                 | 0.18636            | 0.06818       | 0.77429                 | 0.16286            | 0.06286       |
|               | 5-9       | 0.79661                 | 0.14407            | 0.05932       | 0.78981                 | 0.13694            | 0.07325       |
|               | 10-14     | 0.84167                 | 0.11667            | 0.04167       | 0.70056                 | 0.22034            | 0.07910       |
|               | 15-19     | 0.88618                 | 0.09756            | 0.01626       | 0.80634                 | 0.15845            | 0.03521       |
|               | 20-24     | 0.71508                 | 0.21788            | 0.06704       | 0.62295                 | 0.25000            | 0.12705       |
|               | 25-29     | 0.59649                 | 0.30994            | 0.09357       | 0.56915                 | 0.25532            | 0.17553       |
|               | 30-34     | 0.48092                 | 0.41985            | 0.09924       | 0.44920                 | 0.37433            | 0.17647       |
|               | 35-39     | 0.47059                 | 0.37908            | 0.15033       | 0.39785                 | 0.41935            | 0.18280       |
|               | 40-44     | 0.37302                 | 0.34127            | 0.28571       | 0.31844                 | 0.39106            | 0.29050       |
|               | 45-49     | 0.29167                 | 0.45833            | 0.25000       | 0.31875                 | 0.46250            | 0.21875       |
| Department 54 | 50-54     | 0.31532                 | 0.37838            | 0.30631       | 0.29245                 | 0.33962            | 0.36792       |
|               | 55-59     | 0.27632                 | 0.46053            | 0.26316       | 0.29412                 | 0.47059            | 0.23529       |
|               | 0-4       | 0.72789                 | 0.23129            | 0.04082       | 0.82582                 | 0.12090            | 0.05328       |
|               | 5-9       | 0.86093                 | 0.06623            | 0.07285       | 0.81076                 | 0.12749            | 0.06175       |
|               | 10-14     | 0.87692                 | 0.09231            | 0.03077       | 0.79412                 | 0.12395            | 0.08193       |
|               | 15-19     | 0.85714                 | 0.11310            | 0.02976       | 0.80420                 | 0.15152            | 0.04429       |
|               | 20-24     | 0.71595                 | 0.23735            | 0.04669       | 0.69333                 | 0.22400            | 0.08267       |
|               | 25-29     | 0.62687                 | 0.28358            | 0.08955       | 0.57423                 | 0.28571            | 0.14006       |
|               | 30-34     | 0.52198                 | 0.34615            | 0.13187       | 0.46926                 | 0.31715            | 0.21359       |
|               | 35-39     | 0.44059                 | 0.43069            | 0.12871       | 0.40418                 | 0.39024            | 0.20557       |
| Department 68 | 40-44     | 0.42857                 | 0.40373            | 0.16770       | 0.42529                 | 0.39847            | 0.17625       |
|               | 45-49     | 0.29630                 | 0.47531            | 0.22840       | 0.35000                 | 0.41923            | 0.23077       |
|               | 50-54     | 0.35200                 | 0.38400            | 0.26400       | 0.31156                 | 0.43719            | 0.25126       |
|               | 55-59     | 0.40566                 | 0.33019            | 0.26415       | 0.30000                 | 0.44118            | 0.25882       |
|               | 0-4       | 0.76744                 | 0.18140            | 0.05116       | 0.80201                 | 0.17293            | 0.02506       |
|               | 5-9       | 0.77670                 | 0.17476            | 0.04854       | 0.75904                 | 0.14458            | 0.09639       |
|               | 10-14     | 0.74436                 | 0.18797            | 0.06767       | 0.76264                 | 0.16264            | 0.07473       |
|               | 15-19     | 0.87417                 | 0.09272            | 0.03311       | 0.72414                 | 0.19540            | 0.08046       |
|               | 20-24     | 0.76650                 | 0.19797            | 0.03553       | 0.72776                 | 0.20755            | 0.06469       |
|               | 25-29     | 0.61350                 | 0.31288            | 0.07362       | 0.51911                 | 0.34076            | 0.14013       |
| Department 68 | 30-34     | 0.45294                 | 0.38235            | 0.16471       | 0.45745                 | 0.40071            | 0.14184       |
|               | 35-39     | 0.47619                 | 0.34524            | 0.17857       | 0.41057                 | 0.41057            | 0.17886       |
|               | 40-44     | 0.37778                 | 0.45556            | 0.16667       | 0.36218                 | 0.41667            | 0.22115       |
|               | 45-49     | 0.31884                 | 0.45652            | 0.22464       | 0.30798                 | 0.41825            | 0.27376       |
|               | 50-54     | 0.34783                 | 0.46957            | 0.18261       | 0.27094                 | 0.41379            | 0.31527       |
|               | 55-59     | 0.25714                 | 0.48571            | 0.25714       | 0.33333                 | 0.36508            | 0.30159       |

**Table 50. Prevalent rates of lower socioeconomic status population by age group, and body mass index category (Oriental region)**

| Departments   | Age group | Not- overweight in 2005 | Overweight in 2005 | Obese in 2005 | Not- overweight in 2010 | Overweight in 2010 | Obese in 2010 |
|---------------|-----------|-------------------------|--------------------|---------------|-------------------------|--------------------|---------------|
| Department 15 | 0-4       | 0.74468                 | 0.12766            | 0.12766       | 0.69697                 | 0.21212            | 0.09091       |
|               | 5-9       | 0.77778                 | 0.22222            | 0.00000       | 0.84444                 | 0.13333            | 0.02222       |
|               | 10-14     | 0.83333                 | 0.16667            | 0.00000       | 0.77778                 | 0.20000            | 0.02222       |
|               | 15-19     | 0.80000                 | 0.13333            | 0.06667       | 0.84615                 | 0.12821            | 0.02564       |
|               | 20-24     | 0.72222                 | 0.22222            | 0.05556       | 0.66667                 | 0.29630            | 0.03704       |
|               | 25-29     | 0.76471                 | 0.17647            | 0.05882       | 0.58824                 | 0.23529            | 0.17647       |
|               | 30-34     | 0.55556                 | 0.44444            | 0.00000       | 0.33333                 | 0.33333            | 0.33333       |
|               | 35-39     | 0.45455                 | 0.45455            | 0.09091       | 0.56522                 | 0.21739            | 0.21739       |
|               | 40-44     | 0.44444                 | 0.38889            | 0.16667       | 0.40000                 | 0.40000            | 0.20000       |
|               | 45-49     | 0.12500                 | 0.37500            | 0.50000       | 0.52941                 | 0.41176            | 0.05882       |
|               | 50-54     | 0.60000                 | 0.20000            | 0.20000       | 0.11111                 | 0.44444            | 0.44444       |
|               | 55-59     | 0.08333                 | 0.66667            | 0.25000       | 0.33333                 | 0.33333            | 0.33333       |
| Department 25 | 0-4       | 0.75000                 | 0.20000            | 0.05000       | 0.71642                 | 0.23881            | 0.04478       |
|               | 5-9       | 0.87500                 | 0.12500            | 0.00000       | 0.75000                 | 0.18750            | 0.06250       |
|               | 10-14     | 0.86667                 | 0.13333            | 0.00000       | 0.89091                 | 0.09091            | 0.01818       |
|               | 15-19     | 0.66667                 | 0.00000            | 0.33333       | 0.81818                 | 0.12121            | 0.06061       |
|               | 20-24     | 0.70588                 | 0.23529            | 0.05882       | 0.90909                 | 0.06061            | 0.03030       |
|               | 25-29     | 0.43478                 | 0.39130            | 0.17391       | 0.54545                 | 0.36364            | 0.09091       |
|               | 30-34     | 0.50000                 | 0.37500            | 0.12500       | 0.62963                 | 0.25926            | 0.11111       |
|               | 35-39     | 0.41176                 | 0.41176            | 0.17647       | 0.30000                 | 0.50000            | 0.20000       |
|               | 40-44     | 0.47059                 | 0.35294            | 0.17647       | 0.64706                 | 0.05882            | 0.29412       |
|               | 45-49     | 0.22222                 | 0.55556            | 0.22222       | 0.38889                 | 0.27778            | 0.33333       |
|               | 50-54     | 0.16667                 | 0.50000            | 0.33333       | 0.40000                 | 0.35000            | 0.25000       |
|               | 55-59     | 0.28571                 | 0.28571            | 0.42857       | 0.33333                 | 0.50000            | 0.16667       |
| Department 50 | 0-4       | 0.80328                 | 0.13115            | 0.06557       | 0.76866                 | 0.18657            | 0.04478       |
|               | 5-9       | 0.94737                 | 0.00000            | 0.05263       | 0.84167                 | 0.12500            | 0.03333       |
|               | 10-14     | 0.93750                 | 0.06250            | 0.00000       | 0.80672                 | 0.16807            | 0.02521       |
|               | 15-19     | 0.86364                 | 0.13636            | 0.00000       | 0.84404                 | 0.13761            | 0.01835       |
|               | 20-24     | 0.75000                 | 0.21875            | 0.03125       | 0.67647                 | 0.22059            | 0.10294       |
|               | 25-29     | 0.59459                 | 0.27027            | 0.13514       | 0.49254                 | 0.35821            | 0.14925       |
|               | 30-34     | 0.48148                 | 0.48148            | 0.03704       | 0.50000                 | 0.42593            | 0.07407       |
|               | 35-39     | 0.61905                 | 0.28571            | 0.09524       | 0.48077                 | 0.44231            | 0.07692       |
|               | 40-44     | 0.68421                 | 0.21053            | 0.10526       | 0.34000                 | 0.36000            | 0.30000       |
|               | 45-49     | 0.43750                 | 0.50000            | 0.06250       | 0.40426                 | 0.40426            | 0.19149       |
|               | 50-54     | 0.50000                 | 0.28571            | 0.21429       | 0.27273                 | 0.50000            | 0.22727       |
|               | 55-59     | 0.71429                 | 0.21429            | 0.07143       | 0.47619                 | 0.42857            | 0.09524       |
| Department 54 | 0-4       | 0.74713                 | 0.24138            | 0.01149       | 0.83544                 | 0.10970            | 0.05485       |
|               | 5-9       | 0.92857                 | 0.02381            | 0.04762       | 0.88889                 | 0.08213            | 0.02899       |
|               | 10-14     | 0.92593                 | 0.07407            | 0.00000       | 0.87879                 | 0.08081            | 0.04040       |
|               | 15-19     | 0.92857                 | 0.04762            | 0.02381       | 0.88194                 | 0.09722            | 0.02083       |
|               | 20-24     | 0.70833                 | 0.27083            | 0.02083       | 0.72603                 | 0.20548            | 0.06849       |

| Departments   | Age group | Not- overweight in 2005 | Overweight in 2005 | Obese in 2005 | Not- overweight in 2010 | Overweight in 2010 | Obese in 2010 |
|---------------|-----------|-------------------------|--------------------|---------------|-------------------------|--------------------|---------------|
|               | 25-29     | 0.77778                 | 0.20000            | 0.02222       | 0.60000                 | 0.28750            | 0.11250       |
|               | 30-34     | 0.62162                 | 0.35135            | 0.02703       | 0.47706                 | 0.30275            | 0.22018       |
|               | 35-39     | 0.50000                 | 0.42500            | 0.07500       | 0.50000                 | 0.36585            | 0.13415       |
|               | 40-44     | 0.40000                 | 0.40000            | 0.20000       | 0.47297                 | 0.36486            | 0.16216       |
|               | 45-49     | 0.43478                 | 0.30435            | 0.26087       | 0.43056                 | 0.44444            | 0.12500       |
|               | 50-54     | 0.45000                 | 0.35000            | 0.20000       | 0.46032                 | 0.44444            | 0.09524       |
|               | 55-59     | 0.46429                 | 0.32143            | 0.21429       | 0.35417                 | 0.43750            | 0.20833       |
| Department 68 | 0-4       | 0.87500                 | 0.09375            | 0.03125       | 0.85714                 | 0.14286            | 0.00000       |
|               | 5-9       | 0.72222                 | 0.22222            | 0.05556       | 0.78947                 | 0.13684            | 0.07368       |
|               | 10-14     | 0.75000                 | 0.20000            | 0.05000       | 0.89873                 | 0.10127            | 0.00000       |
|               | 15-19     | 0.96429                 | 0.03571            | 0.00000       | 0.84722                 | 0.11111            | 0.04167       |
|               | 20-24     | 0.75000                 | 0.25000            | 0.00000       | 0.74138                 | 0.15517            | 0.10345       |
|               | 25-29     | 0.86667                 | 0.06667            | 0.06667       | 0.67391                 | 0.23913            | 0.08696       |
|               | 30-34     | 0.47368                 | 0.47368            | 0.05263       | 0.53333                 | 0.33333            | 0.13333       |
|               | 35-39     | 0.66667                 | 0.22222            | 0.11111       | 0.55882                 | 0.23529            | 0.20588       |
|               | 40-44     | 0.61905                 | 0.19048            | 0.19048       | 0.39583                 | 0.47917            | 0.12500       |
|               | 45-49     | 0.55556                 | 0.44444            | 0.00000       | 0.58621                 | 0.24138            | 0.17241       |
|               | 50-54     | 0.47059                 | 0.29412            | 0.23529       | 0.40000                 | 0.24000            | 0.36000       |
|               | 55-59     | 0.57143                 | 0.28571            | 0.14286       | 0.50000                 | 0.30000            | 0.20000       |

**Table 51. Prevalent rates of middle socioeconomic status population by age group, and body mass index category (Oriental region)**

| Departments   | Age group     | Not- overweight in 2005 | Overweight in 2005 | Obese in 2005 | Not- overweight in 2010 | Overweight in 2010 | Obese in 2010 |
|---------------|---------------|-------------------------|--------------------|---------------|-------------------------|--------------------|---------------|
| Department 15 | 0-4           | 0.76190                 | 0.14286            | 0.09524       | 0.67619                 | 0.26667            | 0.05714       |
|               | 5-9           | 0.83333                 | 0.16667            | 0.00000       | 0.77778                 | 0.17094            | 0.05128       |
|               | 10-14         | 0.80952                 | 0.14286            | 0.04762       | 0.84906                 | 0.11321            | 0.03774       |
|               | 15-19         | 0.95238                 | 0.00000            | 0.04762       | 0.82143                 | 0.13095            | 0.04762       |
|               | 20-24         | 0.70000                 | 0.25000            | 0.05000       | 0.71233                 | 0.27397            | 0.01370       |
|               | 25-29         | 0.70370                 | 0.25926            | 0.03704       | 0.67164                 | 0.29851            | 0.02985       |
|               | 30-34         | 0.41667                 | 0.45833            | 0.12500       | 0.47761                 | 0.28358            | 0.23881       |
|               | 35-39         | 0.47619                 | 0.42857            | 0.09524       | 0.47619                 | 0.28571            | 0.23810       |
|               | 40-44         | 0.37500                 | 0.43750            | 0.18750       | 0.34146                 | 0.48780            | 0.17073       |
|               | 45-49         | 0.42105                 | 0.21053            | 0.36842       | 0.30000                 | 0.46000            | 0.24000       |
|               | 50-54         | 0.42857                 | 0.57143            | 0.00000       | 0.25000                 | 0.43182            | 0.31818       |
|               | 55-59         | 0.37500                 | 0.50000            | 0.12500       | 0.13636                 | 0.45455            | 0.40909       |
|               | Department 25 | 0-4                     | 0.72414            | 0.22414       | 0.05172                 | 0.70330            | 0.26374       |
| 5-9           |               | 0.78947                 | 0.15789            | 0.05263       | 0.74775                 | 0.18919            | 0.06306       |
| 10-14         |               | 0.77778                 | 0.14815            | 0.07407       | 0.78889                 | 0.18889            | 0.02222       |
| 15-19         |               | 0.95652                 | 0.04348            | 0.00000       | 0.84722                 | 0.13889            | 0.01389       |
| 20-24         |               | 0.71154                 | 0.25000            | 0.03846       | 0.69444                 | 0.20833            | 0.09722       |
| 25-29         |               | 0.58974                 | 0.35897            | 0.05128       | 0.54098                 | 0.36066            | 0.09836       |
| 30-34         |               | 0.48649                 | 0.32432            | 0.18919       | 0.52632                 | 0.31579            | 0.15789       |
| 35-39         |               | 0.40741                 | 0.37037            | 0.22222       | 0.35593                 | 0.40678            | 0.23729       |
| 40-44         | 0.40741       | 0.37037                 | 0.22222            | 0.39583       | 0.45833                 | 0.14583            |               |

| Departments   | Age group     | Not- overweight in 2005 | Overweight in 2005 | Obese in 2005 | Not- overweight in 2010 | Overweight in 2010 | Obese in 2010 |
|---------------|---------------|-------------------------|--------------------|---------------|-------------------------|--------------------|---------------|
|               | 45-49         | 0.23077                 | 0.61538            | 0.15385       | 0.33333                 | 0.42105            | 0.24561       |
|               | 50-54         | 0.48000                 | 0.36000            | 0.16000       | 0.26923                 | 0.50000            | 0.23077       |
|               | 55-59         | 0.33333                 | 0.44444            | 0.22222       | 0.22222                 | 0.44444            | 0.33333       |
| Department 50 | 0-4           | 0.77922                 | 0.15584            | 0.06494       | 0.79817                 | 0.15596            | 0.04587       |
|               | 5-9           | 0.75676                 | 0.13514            | 0.10811       | 0.81188                 | 0.11881            | 0.06931       |
|               | 10-14         | 0.84211                 | 0.10526            | 0.05263       | 0.70732                 | 0.21951            | 0.07317       |
|               | 15-19         | 0.89474                 | 0.10526            | 0.00000       | 0.84146                 | 0.10976            | 0.04878       |
|               | 20-24         | 0.62500                 | 0.25000            | 0.12500       | 0.68421                 | 0.25263            | 0.06316       |
|               | 25-29         | 0.57407                 | 0.31481            | 0.11111       | 0.63793                 | 0.18966            | 0.17241       |
|               | 30-34         | 0.41379                 | 0.44828            | 0.13793       | 0.47273                 | 0.36364            | 0.16364       |
|               | 35-39         | 0.42553                 | 0.38298            | 0.19149       | 0.40000                 | 0.41538            | 0.18462       |
|               | 40-44         | 0.36111                 | 0.33333            | 0.30556       | 0.33929                 | 0.37500            | 0.28571       |
|               | 45-49         | 0.33333                 | 0.41026            | 0.25641       | 0.31915                 | 0.48936            | 0.19149       |
|               | 50-54         | 0.20000                 | 0.43333            | 0.36667       | 0.25926                 | 0.18519            | 0.55556       |
|               | 55-59         | 0.31818                 | 0.54545            | 0.13636       | 0.27273                 | 0.50000            | 0.22727       |
|               | Department 54 | 0-4                     | 0.79091            | 0.18182       | 0.02727                 | 0.82682            | 0.11732       |
| 5-9           |               | 0.94444                 | 0.03704            | 0.01852       | 0.80645                 | 0.14516            | 0.04839       |
| 10-14         |               | 0.89286                 | 0.10714            | 0.00000       | 0.79070                 | 0.12791            | 0.08140       |
| 15-19         |               | 0.84127                 | 0.12698            | 0.03175       | 0.78363                 | 0.15789            | 0.05848       |
| 20-24         |               | 0.73118                 | 0.23656            | 0.03226       | 0.69014                 | 0.21127            | 0.09859       |
| 25-29         |               | 0.60606                 | 0.30303            | 0.09091       | 0.55738                 | 0.28689            | 0.15574       |
| 30-34         |               | 0.55882                 | 0.27941            | 0.16176       | 0.54032                 | 0.30645            | 0.15323       |
| 35-39         |               | 0.43421                 | 0.43421            | 0.13158       | 0.37879                 | 0.40152            | 0.21970       |
| 40-44         |               | 0.40000                 | 0.45455            | 0.14545       | 0.46226                 | 0.32075            | 0.21698       |
| 45-49         |               | 0.36364                 | 0.41818            | 0.21818       | 0.27184                 | 0.44660            | 0.28155       |
| 50-54         |               | 0.42105                 | 0.26316            | 0.31579       | 0.25000                 | 0.42647            | 0.32353       |
| 55-59         |               | 0.45455                 | 0.36364            | 0.18182       | 0.32308                 | 0.43077            | 0.24615       |
| Department 68 |               | 0-4                     | 0.769231           | 0.179487      | 0.051282                | 0.74257            | 0.22772       |
|               | 5-9           | 0.851852                | 0.111111           | 0.037037      | 0.80723                 | 0.10843            | 0.08434       |
|               | 10-14         | 0.787879                | 0.151515           | 0.060606      | 0.73585                 | 0.20755            | 0.05660       |
|               | 15-19         | 0.763158                | 0.157895           | 0.078947      | 0.72603                 | 0.19178            | 0.08219       |
|               | 20-24         | 0.760000                | 0.180000           | 0.060000      | 0.74257                 | 0.21782            | 0.03960       |
|               | 25-29         | 0.583333                | 0.354167           | 0.062500      | 0.56250                 | 0.32813            | 0.10938       |
|               | 30-34         | 0.346154                | 0.442308           | 0.211538      | 0.46875                 | 0.42188            | 0.10938       |
|               | 35-39         | 0.448980                | 0.387755           | 0.163265      | 0.41509                 | 0.37736            | 0.20755       |
|               | 40-44         | 0.410256                | 0.384615           | 0.205128      | 0.43077                 | 0.38462            | 0.18462       |
|               | 45-49         | 0.235294                | 0.529412           | 0.235294      | 0.37681                 | 0.40580            | 0.21739       |
|               | 50-54         | 0.428571                | 0.392857           | 0.178571      | 0.18421                 | 0.47368            | 0.34211       |
|               | 55-59         | 0.153846                | 0.461538           | 0.384615      | 0.32353                 | 0.38235            | 0.29412       |

**Table 52. Prevalent rates of higher socioeconomic status population by age group, and body mass index category (Oriental region)**

| Departments      | Age group | Not- overweight<br>in 2005 | Overweight<br>in 2005 | Obese in<br>2005 | Not- overweight<br>in 2010 | Overweight<br>in 2010 | Obese in<br>2010 |
|------------------|-----------|----------------------------|-----------------------|------------------|----------------------------|-----------------------|------------------|
| Department<br>15 | 0-4       | 0.80000                    | 0.14000               | 0.06000          | 0.71134                    | 0.20619               | 0.08247          |
|                  | 5-9       | 0.78788                    | 0.21212               | 0.00000          | 0.80583                    | 0.13592               | 0.05825          |
|                  | 10-14     | 0.83333                    | 0.11905               | 0.04762          | 0.73600                    | 0.21600               | 0.04800          |
|                  | 15-19     | 0.85000                    | 0.15000               | 0.00000          | 0.82075                    | 0.16038               | 0.01887          |
|                  | 20-24     | 0.87234                    | 0.10638               | 0.02128          | 0.70000                    | 0.20000               | 0.10000          |
|                  | 25-29     | 0.67500                    | 0.25000               | 0.07500          | 0.55405                    | 0.29730               | 0.14865          |
|                  | 30-34     | 0.47222                    | 0.38889               | 0.13889          | 0.46774                    | 0.37097               | 0.16129          |
|                  | 35-39     | 0.47619                    | 0.38095               | 0.14286          | 0.40278                    | 0.45833               | 0.13889          |
|                  | 40-44     | 0.36842                    | 0.42105               | 0.21053          | 0.31646                    | 0.40506               | 0.27848          |
|                  | 45-49     | 0.21212                    | 0.54545               | 0.24242          | 0.28333                    | 0.46667               | 0.25000          |
|                  | 50-54     | 0.10526                    | 0.55263               | 0.34211          | 0.14286                    | 0.62500               | 0.23214          |
| 55-59            | 0.16000   | 0.44000                    | 0.40000               | 0.15556          | 0.60000                    | 0.24444               |                  |
| Department<br>25 | 0-4       | 0.73077                    | 0.19231               | 0.07692          | 0.69048                    | 0.24603               | 0.06349          |
|                  | 5-9       | 0.70909                    | 0.16364               | 0.12727          | 0.73611                    | 0.22917               | 0.03472          |
|                  | 10-14     | 0.71111                    | 0.22222               | 0.06667          | 0.79661                    | 0.14689               | 0.05650          |
|                  | 15-19     | 0.80392                    | 0.17647               | 0.01961          | 0.83929                    | 0.11905               | 0.04167          |
|                  | 20-24     | 0.64516                    | 0.30645               | 0.04839          | 0.68571                    | 0.24762               | 0.06667          |
|                  | 25-29     | 0.53125                    | 0.35938               | 0.10938          | 0.64706                    | 0.24510               | 0.10784          |
|                  | 30-34     | 0.57143                    | 0.28571               | 0.14286          | 0.41096                    | 0.38356               | 0.20548          |
|                  | 35-39     | 0.44615                    | 0.32308               | 0.23077          | 0.38235                    | 0.44118               | 0.17647          |
|                  | 40-44     | 0.32813                    | 0.31250               | 0.35938          | 0.27027                    | 0.51351               | 0.21622          |
|                  | 45-49     | 0.27451                    | 0.45098               | 0.27451          | 0.23656                    | 0.52688               | 0.23656          |
|                  | 50-54     | 0.08333                    | 0.55556               | 0.36111          | 0.15217                    | 0.52174               | 0.32609          |
| 55-59            | 0.29268   | 0.46341                    | 0.24390               | 0.23214          | 0.41071                    | 0.35714               |                  |
| Department<br>50 | 0-4       | 0.67073                    | 0.25610               | 0.07317          | 0.75701                    | 0.14019               | 0.10280          |
|                  | 5-9       | 0.77419                    | 0.19355               | 0.03226          | 0.69892                    | 0.17204               | 0.12903          |
|                  | 10-14     | 0.81818                    | 0.13636               | 0.04545          | 0.58036                    | 0.27679               | 0.14286          |
|                  | 15-19     | 0.90411                    | 0.06849               | 0.02740          | 0.73118                    | 0.22581               | 0.04301          |
|                  | 20-24     | 0.74747                    | 0.20202               | 0.05051          | 0.50617                    | 0.27160               | 0.22222          |
|                  | 25-29     | 0.61250                    | 0.32500               | 0.06250          | 0.58730                    | 0.20635               | 0.20635          |
|                  | 30-34     | 0.50667                    | 0.38667               | 0.10667          | 0.39744                    | 0.34615               | 0.25641          |
|                  | 35-39     | 0.45882                    | 0.40000               | 0.14118          | 0.33333                    | 0.40580               | 0.26087          |
|                  | 40-44     | 0.29577                    | 0.38028               | 0.32394          | 0.28767                    | 0.42466               | 0.28767          |
|                  | 45-49     | 0.23077                    | 0.47692               | 0.29231          | 0.25758                    | 0.48485               | 0.25758          |
|                  | 50-54     | 0.32836                    | 0.37313               | 0.29851          | 0.31579                    | 0.35088               | 0.33333          |
| 55-59            | 0.10000   | 0.50000                    | 0.40000               | 0.21429          | 0.47619                    | 0.30952               |                  |
| Department<br>54 | 0-4       | 0.63918                    | 0.27835               | 0.08247          | 0.79167                    | 0.16667               | 0.04167          |
|                  | 5-9       | 0.72727                    | 0.12727               | 0.14545          | 0.66972                    | 0.18349               | 0.14679          |
|                  | 10-14     | 0.82979                    | 0.08511               | 0.08511          | 0.64151                    | 0.19811               | 0.16038          |
|                  | 15-19     | 0.82540                    | 0.14286               | 0.03175          | 0.73684                    | 0.21053               | 0.05263          |
|                  | 20-24     | 0.70690                    | 0.22414               | 0.06897          | 0.64368                    | 0.27586               | 0.08046          |
|                  | 25-29     | 0.56667                    | 0.31111               | 0.12222          | 0.54667                    | 0.28000               | 0.17333          |
|                  | 30-34     | 0.44156                    | 0.40260               | 0.15584          | 0.34211                    | 0.35526               | 0.30263          |
|                  | 35-39     | 0.41860                    | 0.43023               | 0.15116          | 0.34247                    | 0.39726               | 0.26027          |
| 40-44            | 0.46970   | 0.36364                    | 0.16667               | 0.33333          | 0.53086                    | 0.13580               |                  |

| Departments   | Age group | Not- overweight in 2005 | Overweight in 2005 | Obese in 2005 | Not- overweight in 2010 | Overweight in 2010 | Obese in 2010 |
|---------------|-----------|-------------------------|--------------------|---------------|-------------------------|--------------------|---------------|
|               | 45-49     | 0.21429                 | 0.55952            | 0.22619       | 0.37647                 | 0.36471            | 0.25882       |
|               | 50-54     | 0.28358                 | 0.46269            | 0.25373       | 0.23529                 | 0.44118            | 0.32353       |
|               | 55-59     | 0.33333                 | 0.31111            | 0.35556       | 0.22807                 | 0.45614            | 0.31579       |
| Department 68 | 0-4       | 0.73333                 | 0.20952            | 0.05714       | 0.80676                 | 0.15942            | 0.03382       |
|               | 5-9       | 0.75862                 | 0.18966            | 0.05172       | 0.72996                 | 0.16034            | 0.10970       |
|               | 10-14     | 0.72500                 | 0.20000            | 0.07500       | 0.73333                 | 0.16296            | 0.10370       |
|               | 15-19     | 0.89412                 | 0.08235            | 0.02353       | 0.69484                 | 0.21596            | 0.08920       |
|               | 20-24     | 0.77236                 | 0.19512            | 0.03252       | 0.71698                 | 0.21698            | 0.06604       |
|               | 25-29     | 0.59000                 | 0.33000            | 0.08000       | 0.47059                 | 0.36765            | 0.16176       |
|               | 30-34     | 0.50505                 | 0.33333            | 0.16162       | 0.43353                 | 0.41040            | 0.15607       |
|               | 35-39     | 0.45545                 | 0.34653            | 0.19802       | 0.37736                 | 0.45912            | 0.16352       |
|               | 40-44     | 0.32500                 | 0.52500            | 0.15000       | 0.33166                 | 0.41206            | 0.25628       |
|               | 45-49     | 0.32632                 | 0.43158            | 0.24211       | 0.23030                 | 0.45455            | 0.31515       |
|               | 50-54     | 0.28571                 | 0.54286            | 0.17143       | 0.27143                 | 0.42857            | 0.30000       |
|               | 55-59     | 0.24000                 | 0.52000            | 0.24000       | 0.31111                 | 0.37037            | 0.31852       |

**Table 53. Mortality rates for departments and population size by age group without segregate by socioeconomic status (Oriental region) †**

| Departments   | Age group | Mortality rates (R) (%/year) | Not- overweight population in 2005 (Number of people)1 | Overweight population in 2005 (Number of people)2 | Obese population in 2005 (Number of people)3 |
|---------------|-----------|------------------------------|--------------------------------------------------------|---------------------------------------------------|----------------------------------------------|
| Department 15 | 0-4       | 0.00348                      | 46632                                                  | 8280                                              | 5666                                         |
|               | 5-9       | 0.00037                      | 51323                                                  | 12831                                             | 0                                            |
|               | 10-14     | 0.00029                      | 54874                                                  | 8851                                              | 2655                                         |
|               | 15-19     | 0.00083                      | 53331                                                  | 6464                                              | 1616                                         |
|               | 20-24     | 0.00120                      | 42790                                                  | 8810                                              | 1888                                         |
|               | 25-29     | 0.00147                      | 33519                                                  | 11362                                             | 2841                                         |
|               | 30-34     | 0.00137                      | 21103                                                  | 18822                                             | 4563                                         |
|               | 35-39     | 0.00166                      | 21422                                                  | 18362                                             | 5509                                         |
|               | 40-44     | 0.00231                      | 16324                                                  | 17490                                             | 8162                                         |
|               | 45-49     | 0.00247                      | 9627                                                   | 15043                                             | 11433                                        |
|               | 50-54     | 0.00445                      | 6016                                                   | 15643                                             | 8423                                         |
|               | 55-59     | 0.00649                      | 4990                                                   | 12248                                             | 6805                                         |
| Department 25 | 0-4       | 0.00328                      | 99214                                                  | 27688                                             | 8460                                         |
|               | 5-9       | 0.00020                      | 106953                                                 | 22020                                             | 12583                                        |
|               | 10-14     | 0.00031                      | 112889                                                 | 27367                                             | 8552                                         |
|               | 15-19     | 0.00068                      | 128656                                                 | 18121                                             | 1812                                         |
|               | 20-24     | 0.00119                      | 83108                                                  | 33617                                             | 5603                                         |
|               | 25-29     | 0.00124                      | 57872                                                  | 39733                                             | 11229                                        |
|               | 30-34     | 0.00131                      | 53493                                                  | 30799                                             | 15400                                        |
|               | 35-39     | 0.00136                      | 46239                                                  | 37385                                             | 23611                                        |
|               | 40-44     | 0.00157                      | 38320                                                  | 34488                                             | 30656                                        |
|               | 45-49     | 0.00250                      | 21473                                                  | 42945                                             | 19520                                        |
| 50-54         | 0.00391   | 15822                        | 31643                                                  | 18788                                             |                                              |

| Departments   | Age group | Mortality rates (R) (%/year) | Not- overweight population in 2005 (Number of people) <sup>1</sup> | Overweight population in 2005 (Number of people) <sup>2</sup> | Obese population in 2005 (Number of people) <sup>3</sup> |
|---------------|-----------|------------------------------|--------------------------------------------------------------------|---------------------------------------------------------------|----------------------------------------------------------|
|               | 55-59     | 0.00605                      | 15582                                                              | 22594                                                         | 13245                                                    |
| Department 50 | 0-4       | 0.00387                      | 43508                                                              | 10877                                                         | 3979                                                     |
|               | 5-9       | 0.00043                      | 46087                                                              | 8335                                                          | 3432                                                     |
|               | 10-14     | 0.00045                      | 50731                                                              | 7032                                                          | 2511                                                     |
|               | 15-19     | 0.00087                      | 51970                                                              | 5721                                                          | 954                                                      |
|               | 20-24     | 0.00204                      | 37181                                                              | 11329                                                         | 3486                                                     |
|               | 25-29     | 0.00231                      | 28361                                                              | 14737                                                         | 4449                                                     |
|               | 30-34     | 0.00221                      | 20217                                                              | 17650                                                         | 4172                                                     |
|               | 35-39     | 0.00245                      | 19584                                                              | 15776                                                         | 6256                                                     |
|               | 40-44     | 0.00312                      | 14121                                                              | 12919                                                         | 10816                                                    |
|               | 45-49     | 0.00332                      | 8880                                                               | 13954                                                         | 7611                                                     |
|               | 50-54     | 0.00537                      | 7335                                                               | 8803                                                          | 7126                                                     |
|               | 55-59     | 0.00707                      | 4965                                                               | 8274                                                          | 4728                                                     |
| Department 54 | 0-4       | 0.00288                      | 71295                                                              | 22654                                                         | 3998                                                     |
|               | 5-9       | 0.00027                      | 89750                                                              | 6904                                                          | 7594                                                     |
|               | 10-14     | 0.00025                      | 86793                                                              | 9136                                                          | 3045                                                     |
|               | 15-19     | 0.00112                      | 79891                                                              | 10541                                                         | 2774                                                     |
|               | 20-24     | 0.00208                      | 61394                                                              | 20353                                                         | 4004                                                     |
|               | 25-29     | 0.00221                      | 46821                                                              | 21181                                                         | 6689                                                     |
|               | 30-34     | 0.00286                      | 34368                                                              | 22791                                                         | 8682                                                     |
|               | 35-39     | 0.00251                      | 28618                                                              | 27975                                                         | 8360                                                     |
|               | 40-44     | 0.00310                      | 25813                                                              | 24316                                                         | 10101                                                    |
|               | 45-49     | 0.00390                      | 14831                                                              | 23792                                                         | 11433                                                    |
|               | 50-54     | 0.00619                      | 14055                                                              | 15332                                                         | 10541                                                    |
|               | 55-59     | 0.00799                      | 12591                                                              | 10249                                                         | 8199                                                     |
| Department 68 | 0-4       | 0.00252                      | 93646                                                              | 22135                                                         | 6243                                                     |
|               | 5-9       | 0.00024                      | 104748                                                             | 23568                                                         | 6547                                                     |
|               | 10-14     | 0.00022                      | 105922                                                             | 26748                                                         | 9629                                                     |
|               | 15-19     | 0.00079                      | 120047                                                             | 12732                                                         | 4547                                                     |
|               | 20-24     | 0.00119                      | 98073                                                              | 25330                                                         | 4546                                                     |
|               | 25-29     | 0.00143                      | 70983                                                              | 36202                                                         | 8518                                                     |
|               | 30-34     | 0.00151                      | 47108                                                              | 39766                                                         | 17130                                                    |
|               | 35-39     | 0.00166                      | 50215                                                              | 36406                                                         | 18831                                                    |
|               | 40-44     | 0.00186                      | 37523                                                              | 45249                                                         | 16554                                                    |
|               | 45-49     | 0.00273                      | 25817                                                              | 36965                                                         | 18189                                                    |
|               | 50-54     | 0.00506                      | 22356                                                              | 30181                                                         | 11737                                                    |
|               | 55-59     | 0.00666                      | 13314                                                              | 25148                                                         | 13314                                                    |

†Values used in this table are for the urban population

<sup>1</sup> Initial value used in the stock of not-overweight population in 2005.

<sup>2</sup> Initial value used in the stock of overweight population in 2005.

<sup>3</sup> Initial value used in the stock of obese population in 2005.

**Table 54. Mortality rates and population size by age group at the department level for the lower socioeconomic status population (Oriental region) †**



| Departments   | Age group | Mortality rates (R) (%/year) | Not- overweight population in 2005 (Number of people)1 | Overweight population in 2005 (Number of people)2 | Obese population in 2005 (Number of people)3 |
|---------------|-----------|------------------------------|--------------------------------------------------------|---------------------------------------------------|----------------------------------------------|
| Department 15 | 0-4       | 0.00348                      | 15253                                                  | 2615                                              | 2615                                         |
|               | 5-9       | 0.00037                      | 11975                                                  | 3422                                              | 0                                            |
|               | 10-14     | 0.00029                      | 8851                                                   | 1770                                              | 0                                            |
|               | 15-19     | 0.00083                      | 9697                                                   | 1616                                              | 808                                          |
|               | 20-24     | 0.00120                      | 8180                                                   | 2517                                              | 629                                          |
|               | 25-29     | 0.00147                      | 7386                                                   | 1704                                              | 568                                          |
|               | 30-34     | 0.00137                      | 5704                                                   | 4563                                              | 0                                            |
|               | 35-39     | 0.00166                      | 3060                                                   | 3060                                              | 612                                          |
|               | 40-44     | 0.00231                      | 4664                                                   | 4081                                              | 1749                                         |
|               | 45-49     | 0.00247                      | 602                                                    | 1805                                              | 2407                                         |
|               | 50-54     | 0.00445                      | 1805                                                   | 602                                               | 602                                          |
| Department 25 | 0-4       | 0.00328                      | 23073                                                  | 6153                                              | 1538                                         |
|               | 5-9       | 0.00020                      | 22020                                                  | 3146                                              | 0                                            |
|               | 10-14     | 0.00031                      | 22236                                                  | 3421                                              | 0                                            |
|               | 15-19     | 0.00068                      | 13822                                                  | 0                                                 | 6911                                         |
|               | 20-24     | 0.00119                      | 11206                                                  | 3735                                              | 934                                          |
|               | 25-29     | 0.00124                      | 8638                                                   | 7774                                              | 3455                                         |
|               | 30-34     | 0.00131                      | 6484                                                   | 4863                                              | 1621                                         |
|               | 35-39     | 0.00136                      | 6887                                                   | 6887                                              | 2951                                         |
|               | 40-44     | 0.00157                      | 7664                                                   | 5748                                              | 2874                                         |
|               | 45-49     | 0.00250                      | 1952                                                   | 4880                                              | 1952                                         |
|               | 50-54     | 0.00391                      | 989                                                    | 2967                                              | 1978                                         |
| Department 50 | 0-4       | 0.00387                      | 12999                                                  | 2122                                              | 1061                                         |
|               | 5-9       | 0.00043                      | 8825                                                   | 0                                                 | 490                                          |
|               | 10-14     | 0.00045                      | 7534                                                   | 502                                               | 0                                            |
|               | 15-19     | 0.00087                      | 8378                                                   | 1323                                              | 0                                            |
|               | 20-24     | 0.00204                      | 6971                                                   | 2033                                              | 290                                          |
|               | 25-29     | 0.00231                      | 6117                                                   | 2781                                              | 1390                                         |
|               | 30-34     | 0.00221                      | 4172                                                   | 4172                                              | 321                                          |
|               | 35-39     | 0.00245                      | 3536                                                   | 1632                                              | 544                                          |
|               | 40-44     | 0.00312                      | 3906                                                   | 1202                                              | 601                                          |
|               | 45-49     | 0.00332                      | 1776                                                   | 2030                                              | 254                                          |
|               | 50-54     | 0.00537                      | 1467                                                   | 838                                               | 629                                          |
| Department 54 | 0-4       | 0.00288                      | 21655                                                  | 6996                                              | 333                                          |
|               | 5-9       | 0.00027                      | 26925                                                  | 690                                               | 1381                                         |
|               | 10-14     | 0.00025                      | 19034                                                  | 1523                                              | 0                                            |
|               | 15-19     | 0.00112                      | 21637                                                  | 1110                                              | 555                                          |
|               | 20-24     | 0.00208                      | 11344                                                  | 4338                                              | 334                                          |
|               | 25-29     | 0.00221                      | 13006                                                  | 3344                                              | 372                                          |
|               | 30-34     | 0.00286                      | 8321                                                   | 4703                                              | 362                                          |
|               | 35-39     | 0.00251                      | 6431                                                   | 5466                                              | 965                                          |

| Departments   | Age group | Mortality rates (R) (%/year) | Not- overweight population in 2005 (Number of people)1 | Overweight population in 2005 (Number of people)2 | Obese population in 2005 (Number of people)3 |
|---------------|-----------|------------------------------|--------------------------------------------------------|---------------------------------------------------|----------------------------------------------|
|               | 40-44     | 0.00310                      | 5986                                                   | 5986                                              | 2993                                         |
|               | 45-49     | 0.00390                      | 3090                                                   | 2163                                              | 1854                                         |
|               | 50-54     | 0.00619                      | 2875                                                   | 2236                                              | 1278                                         |
|               | 55-59     | 0.00799                      | 3807                                                   | 2635                                              | 1757                                         |
| Department 68 | 0-4       | 0.00252                      | 15891                                                  | 1703                                              | 568                                          |
|               | 5-9       | 0.00024                      | 17022                                                  | 5237                                              | 1309                                         |
|               | 10-14     | 0.00022                      | 16049                                                  | 4280                                              | 1070                                         |
|               | 15-19     | 0.00079                      | 24555                                                  | 909                                               | 0                                            |
|               | 20-24     | 0.00119                      | 11691                                                  | 3897                                              | 0                                            |
|               | 25-29     | 0.00143                      | 9228                                                   | 710                                               | 710                                          |
|               | 30-34     | 0.00151                      | 5506                                                   | 5506                                              | 612                                          |
|               | 35-39     | 0.00166                      | 7532                                                   | 2511                                              | 1255                                         |
|               | 40-44     | 0.00186                      | 7174                                                   | 2207                                              | 2207                                         |
|               | 45-49     | 0.00273                      | 2934                                                   | 2347                                              | 0                                            |
|               | 50-54     | 0.00506                      | 4471                                                   | 2795                                              | 2236                                         |
|               | 55-59     | 0.00666                      | 2959                                                   | 1479                                              | 740                                          |

†Values used in this table are for the urban population

<sup>1</sup> Initial value used in the stock of not-overweight population in 2005 for lower SES.

<sup>2</sup> Initial value used in the stock of overweight population in 2005 for lower SES.

<sup>3</sup> Initial value used in the stock of obese population in 2005 for lower SES.

**Table 55. Mortality rates and population size by age group at the department level for the middle socioeconomic status population (Oriental region) †**

| Departments   | Age group | Mortality rates (R) (%/year) | Not- overweight population in 2005 (Number of people)1 | Overweight population in 2005 (Number of people)2 | Obese population in 2005 (Number of people)3 |
|---------------|-----------|------------------------------|--------------------------------------------------------|---------------------------------------------------|----------------------------------------------|
| Department 15 | 0-4       | 0.00348                      | 13946                                                  | 2615                                              | 1743                                         |
|               | 5-9       | 0.00037                      | 17108                                                  | 3422                                              | 0                                            |
|               | 10-14     | 0.00029                      | 15046                                                  | 2655                                              | 885                                          |
|               | 15-19     | 0.00083                      | 16161                                                  | 0                                                 | 808                                          |
|               | 20-24     | 0.00120                      | 8810                                                   | 3146                                              | 629                                          |
|               | 25-29     | 0.00147                      | 10794                                                  | 3977                                              | 568                                          |
|               | 30-34     | 0.00137                      | 5704                                                   | 6274                                              | 1711                                         |
|               | 35-39     | 0.00166                      | 6121                                                   | 5509                                              | 1224                                         |
|               | 40-44     | 0.00231                      | 3498                                                   | 4081                                              | 1749                                         |
|               | 45-49     | 0.00247                      | 4814                                                   | 2407                                              | 4212                                         |
|               | 50-54     | 0.00445                      | 1805                                                   | 2407                                              | 0                                            |
| Department 25 | 55-59     | 0.00649                      | 2722                                                   | 3629                                              | 907                                          |
|               | 0-4       | 0.00328                      | 32302                                                  | 9998                                              | 2307                                         |
|               | 5-9       | 0.00020                      | 23593                                                  | 4719                                              | 1573                                         |
|               | 10-14     | 0.00031                      | 35919                                                  | 6842                                              | 3421                                         |
|               | 15-19     | 0.00068                      | 38011                                                  | 1728                                              | 0                                            |
|               | 20-24     | 0.00119                      | 34550                                                  | 12139                                             | 1868                                         |
|               | 25-29     | 0.00124                      | 19867                                                  | 12093                                             | 1728                                         |

| Departments   | Age group | Mortality rates (R) (%/year) | Not- overweight population in 2005 (Number of people)1 | Overweight population in 2005 (Number of people)2 | Obese population in 2005 (Number of people)3 |
|---------------|-----------|------------------------------|--------------------------------------------------------|---------------------------------------------------|----------------------------------------------|
|               | 30-34     | 0.00131                      | 14589                                                  | 9726                                              | 5674                                         |
|               | 35-39     | 0.00136                      | 10822                                                  | 9838                                              | 5903                                         |
|               | 40-44     | 0.00157                      | 10538                                                  | 9580                                              | 5748                                         |
|               | 45-49     | 0.00250                      | 5856                                                   | 15616                                             | 3904                                         |
|               | 50-54     | 0.00391                      | 11866                                                  | 8900                                              | 3955                                         |
|               | 55-59     | 0.00605                      | 4675                                                   | 6233                                              | 3116                                         |
| Department 50 | 0-4       | 0.00387                      | 15918                                                  | 3184                                              | 1326                                         |
|               | 5-9       | 0.00043                      | 13728                                                  | 2451                                              | 1961                                         |
|               | 10-14     | 0.00045                      | 16073                                                  | 2009                                              | 1005                                         |
|               | 15-19     | 0.00087                      | 14992                                                  | 1764                                              | 0                                            |
|               | 20-24     | 0.00204                      | 8714                                                   | 3486                                              | 1743                                         |
|               | 25-29     | 0.00231                      | 8620                                                   | 4727                                              | 1668                                         |
|               | 30-34     | 0.00221                      | 3851                                                   | 4172                                              | 1284                                         |
|               | 35-39     | 0.00245                      | 5440                                                   | 4896                                              | 2448                                         |
|               | 40-44     | 0.00312                      | 3906                                                   | 3605                                              | 3305                                         |
|               | 45-49     | 0.00332                      | 3298                                                   | 4059                                              | 2537                                         |
|               | 50-54     | 0.00537                      | 1258                                                   | 2725                                              | 2305                                         |
| 55-59         | 0.00707   | 1655                         | 2837                                                   | 709                                               |                                              |
| Department 54 | 0-4       | 0.00288                      | 28984                                                  | 6663                                              | 999                                          |
|               | 5-9       | 0.00027                      | 35210                                                  | 1381                                              | 690                                          |
|               | 10-14     | 0.00025                      | 38067                                                  | 4568                                              | 0                                            |
|               | 15-19     | 0.00112                      | 29404                                                  | 4438                                              | 1110                                         |
|               | 20-24     | 0.00208                      | 22689                                                  | 7341                                              | 1001                                         |
|               | 25-29     | 0.00221                      | 14864                                                  | 7432                                              | 2230                                         |
|               | 30-34     | 0.00286                      | 13747                                                  | 6874                                              | 3979                                         |
|               | 35-39     | 0.00251                      | 10611                                                  | 10611                                             | 3215                                         |
|               | 40-44     | 0.00310                      | 8230                                                   | 9352                                              | 2993                                         |
|               | 45-49     | 0.00390                      | 6180                                                   | 7107                                              | 3708                                         |
|               | 50-54     | 0.00619                      | 5111                                                   | 3194                                              | 3833                                         |
| 55-59         | 0.00799   | 4392                         | 3514                                                   | 1757                                              |                                              |
| Department 68 | 0-4       | 0.00252                      | 34053                                                  | 7946                                              | 2270                                         |
|               | 5-9       | 0.00024                      | 30115                                                  | 3928                                              | 1309                                         |
|               | 10-14     | 0.00022                      | 27818                                                  | 5350                                              | 2140                                         |
|               | 15-19     | 0.00079                      | 26374                                                  | 5457                                              | 2728                                         |
|               | 20-24     | 0.00119                      | 24681                                                  | 5845                                              | 1948                                         |
|               | 25-29     | 0.00143                      | 19875                                                  | 12067                                             | 2130                                         |
|               | 30-34     | 0.00151                      | 11012                                                  | 14071                                             | 6730                                         |
|               | 35-39     | 0.00166                      | 13809                                                  | 11926                                             | 5021                                         |
|               | 40-44     | 0.00186                      | 8829                                                   | 8277                                              | 4414                                         |
|               | 45-49     | 0.00273                      | 4694                                                   | 10561                                             | 4694                                         |
|               | 50-54     | 0.00506                      | 6707                                                   | 6148                                              | 2795                                         |
| 55-59         | 0.00666   | 1479                         | 4438                                                   | 3698                                              |                                              |

† Values used in this table are for the urban population

1 Initial value used in the stock of not-overweight population in 2005 for middle SES.

2 Initial value used in the stock of overweight population in 2005 for middle SES.

3 Initial value used in the stock of obese population in 2005 for middle SES.

**Table 56. Mortality rates and population size by age group at the department level for the higher socioeconomic status population (Oriental region) †**

| Departments   | Age group | Mortality rates (R) (%/year) | Not- overweight population in 2005 (Number of people) <sup>1</sup> | Overweight population in 2005 (Number of people) <sup>2</sup> | Obese population in 2005 (Number of people) <sup>3</sup> |
|---------------|-----------|------------------------------|--------------------------------------------------------------------|---------------------------------------------------------------|----------------------------------------------------------|
| Department 15 | 0-4       | 0.00348                      | 17433                                                              | 3051                                                          | 1307                                                     |
|               | 5-9       | 0.00037                      | 22240                                                              | 5988                                                          | 0                                                        |
|               | 10-14     | 0.00029                      | 30977                                                              | 4425                                                          | 1770                                                     |
|               | 15-19     | 0.00083                      | 27474                                                              | 4848                                                          | 0                                                        |
|               | 20-24     | 0.00120                      | 25800                                                              | 3146                                                          | 629                                                      |
|               | 25-29     | 0.00147                      | 15339                                                              | 5681                                                          | 1704                                                     |
|               | 30-34     | 0.00137                      | 9696                                                               | 7985                                                          | 2852                                                     |
|               | 35-39     | 0.00166                      | 12241                                                              | 9793                                                          | 3672                                                     |
|               | 40-44     | 0.00231                      | 8162                                                               | 9328                                                          | 4664                                                     |
|               | 45-49     | 0.00247                      | 4212                                                               | 10831                                                         | 4814                                                     |
|               | 50-54     | 0.00445                      | 2407                                                               | 12634                                                         | 7821                                                     |
|               | 55-59     | 0.00649                      | 1815                                                               | 4990                                                          | 4536                                                     |
| Department 25 | 0-4       | 0.00328                      | 43839                                                              | 11537                                                         | 4615                                                     |
|               | 5-9       | 0.00020                      | 61341                                                              | 14156                                                         | 11010                                                    |
|               | 10-14     | 0.00031                      | 54734                                                              | 17104                                                         | 5131                                                     |
|               | 15-19     | 0.00068                      | 70839                                                              | 15550                                                         | 1728                                                     |
|               | 20-24     | 0.00119                      | 37352                                                              | 17742                                                         | 2801                                                     |
|               | 25-29     | 0.00124                      | 29368                                                              | 19867                                                         | 6046                                                     |
|               | 30-34     | 0.00131                      | 32420                                                              | 16210                                                         | 8105                                                     |
|               | 35-39     | 0.00136                      | 28530                                                              | 20660                                                         | 14757                                                    |
|               | 40-44     | 0.00157                      | 20118                                                              | 19160                                                         | 22034                                                    |
|               | 45-49     | 0.00250                      | 13664                                                              | 22449                                                         | 13664                                                    |
|               | 50-54     | 0.00391                      | 2967                                                               | 19777                                                         | 12855                                                    |
|               | 55-59     | 0.00605                      | 9349                                                               | 14803                                                         | 7791                                                     |
| Department 50 | 0-4       | 0.00387                      | 14591                                                              | 5571                                                          | 1592                                                     |
|               | 5-9       | 0.00043                      | 23534                                                              | 5883                                                          | 981                                                      |
|               | 10-14     | 0.00045                      | 27123                                                              | 4521                                                          | 1507                                                     |
|               | 15-19     | 0.00087                      | 29102                                                              | 2205                                                          | 882                                                      |
|               | 20-24     | 0.00204                      | 21495                                                              | 5809                                                          | 1452                                                     |
|               | 25-29     | 0.00231                      | 13625                                                              | 7229                                                          | 1390                                                     |
|               | 30-34     | 0.00221                      | 12195                                                              | 9306                                                          | 2567                                                     |
|               | 35-39     | 0.00245                      | 10608                                                              | 9248                                                          | 3264                                                     |
|               | 40-44     | 0.00312                      | 6309                                                               | 8112                                                          | 6910                                                     |
|               | 45-49     | 0.00332                      | 3806                                                               | 7865                                                          | 4820                                                     |
|               | 50-54     | 0.00537                      | 4611                                                               | 5240                                                          | 4192                                                     |
|               | 55-59     | 0.00707                      | 946                                                                | 4728                                                          | 3783                                                     |
| Department 54 | 0-4       | 0.00288                      | 20655                                                              | 8995                                                          | 2665                                                     |
|               | 5-9       | 0.00027                      | 27615                                                              | 4833                                                          | 5523                                                     |
|               | 10-14     | 0.00025                      | 29693                                                              | 3045                                                          | 3045                                                     |

| Departments   | Age group | Mortality rates (R) (%/year) | Not- overweight population in 2005 (Number of people) <sup>1</sup> | Overweight population in 2005 (Number of people) <sup>2</sup> | Obese population in 2005 (Number of people) <sup>3</sup> |
|---------------|-----------|------------------------------|--------------------------------------------------------------------|---------------------------------------------------------------|----------------------------------------------------------|
|               | 15-19     | 0.00112                      | 28849                                                              | 4993                                                          | 1110                                                     |
|               | 20-24     | 0.00208                      | 27360                                                              | 8675                                                          | 2669                                                     |
|               | 25-29     | 0.00221                      | 18951                                                              | 10405                                                         | 4088                                                     |
|               | 30-34     | 0.00286                      | 12300                                                              | 11215                                                         | 4341                                                     |
|               | 35-39     | 0.00251                      | 11576                                                              | 11897                                                         | 4180                                                     |
|               | 40-44     | 0.00310                      | 11597                                                              | 8978                                                          | 4115                                                     |
|               | 45-49     | 0.00390                      | 5562                                                               | 14522                                                         | 5871                                                     |
|               | 50-54     | 0.00619                      | 6069                                                               | 9902                                                          | 5430                                                     |
|               | 55-59     | 0.00799                      | 4392                                                               | 4099                                                          | 4685                                                     |
| Department 68 | 0-4       | 0.00252                      | 43702                                                              | 12486                                                         | 3405                                                     |
|               | 5-9       | 0.00024                      | 57611                                                              | 14403                                                         | 3928                                                     |
|               | 10-14     | 0.00022                      | 62055                                                              | 17119                                                         | 6420                                                     |
|               | 15-19     | 0.00079                      | 69118                                                              | 6366                                                          | 1819                                                     |
|               | 20-24     | 0.00119                      | 61702                                                              | 15588                                                         | 2598                                                     |
|               | 25-29     | 0.00143                      | 41880                                                              | 23425                                                         | 5679                                                     |
|               | 30-34     | 0.00151                      | 30589                                                              | 20189                                                         | 9789                                                     |
|               | 35-39     | 0.00166                      | 28873                                                              | 21969                                                         | 12554                                                    |
|               | 40-44     | 0.00186                      | 21521                                                              | 34764                                                         | 9933                                                     |
|               | 45-49     | 0.00273                      | 18189                                                              | 24057                                                         | 13495                                                    |
| 50-54         | 0.00506   | 11178                        | 21238                                                              | 6707                                                          |                                                          |
| 55-59         | 0.00666   | 8876                         | 19231                                                              | 8876                                                          |                                                          |

<sup>1</sup>Values used in this table are for the urban population

<sup>2</sup> Initial value used in the stock of not-overweight population in 2005 for higher SES.

<sup>3</sup> Initial value used in the stock of overweight population in 2005 for higher SES.

<sup>3</sup> Initial value used in the stock of obese population in 2005 for higher SES.

## 1.3 Central region

The Central region of Colombia is located in the central area of the national territory and consists of seven departments, these are:

- Antioquia (5)
- Caldas (17)
- Caquetá (18)
- Huila (41)
- Quindío (63)
- Risaralda (66)
- Tolima (73)

### 1.3.1 Data and model parameters used

**Table 57. Prevalent rates of entire population by age group, gender, and body mass index category in 2005 (Central region)**

| Age Group | Nutritional State | Nutritional State |
|-----------|-------------------|-------------------|
|-----------|-------------------|-------------------|

|       | Male          |           |         | Female        |           |         |
|-------|---------------|-----------|---------|---------------|-----------|---------|
|       | Not-Overweigh | Overweigh | Obese   | Not-Overweigh | Overweigh | Obese   |
| 0-4   | 0.76770       | 0.16770   | 0.06460 | 0.78267       | 0.16933   | 0.04800 |
| 5-9   | 0.81472       | 0.13198   | 0.05330 | 0.82339       | 0.14081   | 0.03580 |
| 10-14 | 0.82791       | 0.13488   | 0.03721 | 0.82725       | 0.12652   | 0.04623 |
| 15-19 | 0.90638       | 0.07447   | 0.01915 | 0.83814       | 0.13301   | 0.02885 |
| 20-24 | 0.80000       | 0.14959   | 0.05041 | 0.77162       | 0.17295   | 0.05543 |
| 25-29 | 0.67008       | 0.26844   | 0.06148 | 0.66667       | 0.24151   | 0.09182 |
| 30-34 | 0.51111       | 0.38519   | 0.10370 | 0.55686       | 0.31895   | 0.12418 |
| 35-39 | 0.48931       | 0.39430   | 0.11639 | 0.47821       | 0.35714   | 0.16465 |
| 40-44 | 0.46599       | 0.42569   | 0.10831 | 0.44226       | 0.36745   | 0.19029 |
| 45-49 | 0.46226       | 0.42689   | 0.11085 | 0.33725       | 0.40000   | 0.26275 |
| 50-54 | 0.44126       | 0.44986   | 0.10888 | 0.28033       | 0.41967   | 0.30000 |
| 55-59 | 0.41603       | 0.41221   | 0.17176 | 0.29211       | 0.42431   | 0.28358 |

**Table 58. Prevalent rates of lower socioeconomic status population by age group, gender, and body mass index category in 2005 (Central region)**

| Age Group | Nutritional State Male |           |         | Nutritional State Female |           |         |
|-----------|------------------------|-----------|---------|--------------------------|-----------|---------|
|           | Not-Overweigh          | Overweigh | Obese   | Not-Overweigh            | Overweigh | Obese   |
| 0-4       | 0.78008                | 0.17012   | 0.04979 | 0.84038                  | 0.13615   | 0.02347 |
| 5-9       | 0.84211                | 0.13158   | 0.02632 | 0.85882                  | 0.12941   | 0.01176 |
| 10-14     | 0.87640                | 0.11236   | 0.01124 | 0.87000                  | 0.10000   | 0.03000 |
| 15-19     | 0.94681                | 0.05319   | 0.00000 | 0.81395                  | 0.17829   | 0.00775 |
| 20-24     | 0.87736                | 0.06604   | 0.05660 | 0.77326                  | 0.16279   | 0.06395 |
| 25-29     | 0.75510                | 0.22449   | 0.02041 | 0.64706                  | 0.22794   | 0.12500 |
| 30-34     | 0.63636                | 0.27273   | 0.09091 | 0.51724                  | 0.39310   | 0.08966 |
| 35-39     | 0.71212                | 0.21212   | 0.07576 | 0.38235                  | 0.41176   | 0.20588 |
| 40-44     | 0.66667                | 0.26667   | 0.06667 | 0.36538                  | 0.33654   | 0.29808 |
| 45-49     | 0.56757                | 0.39189   | 0.04054 | 0.41489                  | 0.43617   | 0.14894 |
| 50-54     | 0.58209                | 0.40299   | 0.01493 | 0.41053                  | 0.34737   | 0.24211 |
| 55-59     | 0.58182                | 0.30909   | 0.10909 | 0.43548                  | 0.29032   | 0.27419 |

**Table 59. Prevalent rates of middle socioeconomic status population by age group, gender, and body mass index category in 2005 (Central region)**

| Age Group | Nutritional State Male |           |         | Nutritional State Female |           |         |
|-----------|------------------------|-----------|---------|--------------------------|-----------|---------|
|           | Not-Overweigh          | Overweigh | Obese   | Not-Overweigh            | Overweigh | Obese   |
| 0-4       | 0.77273                | 0.15909   | 0.06818 | 0.75104                  | 0.18257   | 0.06639 |
| 5-9       | 0.82963                | 0.11852   | 0.05185 | 0.84071                  | 0.10619   | 0.05310 |
| 10-14     | 0.84932                | 0.11644   | 0.03425 | 0.84000                  | 0.12800   | 0.03200 |
| 15-19     | 0.88636                | 0.09091   | 0.02273 | 0.87135                  | 0.09942   | 0.02924 |
| 20-24     | 0.86628                | 0.08140   | 0.05233 | 0.75290                  | 0.18147   | 0.06564 |
| 25-29     | 0.72180                | 0.21053   | 0.06767 | 0.62931                  | 0.26293   | 0.10776 |
| 30-34     | 0.57480                | 0.34646   | 0.07874 | 0.46117                  | 0.36893   | 0.16990 |
| 35-39     | 0.49600                | 0.40800   | 0.09600 | 0.46875                  | 0.34375   | 0.18750 |
| 40-44     | 0.51754                | 0.40351   | 0.07895 | 0.38378                  | 0.41081   | 0.20541 |
| 45-49     | 0.53571                | 0.33929   | 0.12500 | 0.28037                  | 0.46729   | 0.25234 |
| 50-54     | 0.52564                | 0.39744   | 0.07692 | 0.24823                  | 0.38298   | 0.36879 |
| 55-59     | 0.47273                | 0.40000   | 0.12727 | 0.29293                  | 0.42424   | 0.28283 |

**Table 60. Prevalent rates of higher socioeconomic status population by age group, gender, and body mass index category in 2005 (Central region)**

| Age Group | Nutritional State Male |             |             | Nutritional State Female |            |            |
|-----------|------------------------|-------------|-------------|--------------------------|------------|------------|
|           | Not-Overweigh          | Overweigh   | Obese       | Not-Overweigh            | Overweigh  | Obese      |
| 0-4       | 0,753333333            | 0,173333333 | 0,073333333 | 0,76689189               | 0,18243243 | 0,05067568 |
| 5-9       | 0,792349727            | 0,142076503 | 0,065573770 | 0,80090498               | 0,16289593 | 0,0361991  |
| 10-14     | 0,789743590            | 0,158974359 | 0,051282051 | 0,79569892               | 0,13978495 | 0,06451613 |
| 15-19     | 0,901639344            | 0,073770492 | 0,024590164 | 0,83024691               | 0,13271605 | 0,03703704 |
| 20-24     | 0,741839763            | 0,210682493 | 0,047477745 | 0,78131635               | 0,17197452 | 0,04670913 |
| 25-29     | 0,610894942            | 0,315175097 | 0,073929961 | 0,69320843               | 0,23419204 | 0,07259953 |
| 30-34     | 0,433962264            | 0,443396226 | 0,122641509 | 0,61835749               | 0,26811594 | 0,11352657 |
| 35-39     | 0,421739130            | 0,439130435 | 0,139130435 | 0,51072961               | 0,34763948 | 0,1416309  |
| 40-44     | 0,385650224            | 0,479820628 | 0,134529148 | 0,4820296                | 0,35729387 | 0,16067653 |
| 45-49     | 0,394957983            | 0,478991597 | 0,126050420 | 0,34792123               | 0,36105033 | 0,29102845 |
| 50-54     | 0,362745098            | 0,485294118 | 0,151960784 | 0,25935829               | 0,45187166 | 0,28877005 |
| 55-59     | 0,335526316            | 0,453947368 | 0,210526316 | 0,26298701               | 0,4512987  | 0,28571429 |

**Table 61. Prevalent rates of entire population by age group, gender, and body mass index category in 2010 (Central region)**

| Age Group | Nutritional State Male |           |         | Nutritional State Female |           |         |
|-----------|------------------------|-----------|---------|--------------------------|-----------|---------|
|           | Not-Overweigh          | Overweigh | Obese   | Not-Overweigh            | Overweigh | Obese   |
| 0-4       | 0.75646                | 0.20204   | 0.04150 | 0.74368                  | 0.20573   | 0.05059 |
| 5-9       | 0.74457                | 0.15421   | 0.10122 | 0.78224                  | 0.15574   | 0.06202 |
| 10-14     | 0.77203                | 0.15971   | 0.06826 | 0.80088                  | 0.16206   | 0.03706 |
| 15-19     | 0.86534                | 0.10670   | 0.02796 | 0.80834                  | 0.14375   | 0.04792 |
| 20-24     | 0.75588                | 0.19216   | 0.05196 | 0.70886                  | 0.21296   | 0.07818 |
| 25-29     | 0.56257                | 0.33333   | 0.10410 | 0.57454                  | 0.29481   | 0.13065 |
| 30-34     | 0.44140                | 0.40274   | 0.15586 | 0.48689                  | 0.34003   | 0.17308 |
| 35-39     | 0.41395                | 0.43323   | 0.15282 | 0.40151                  | 0.39114   | 0.20735 |
| 40-44     | 0.41495                | 0.43428   | 0.15077 | 0.35678                  | 0.39365   | 0.24957 |
| 45-49     | 0.37926                | 0.44611   | 0.17462 | 0.32857                  | 0.42411   | 0.24732 |
| 50-54     | 0.36364                | 0.48963   | 0.14673 | 0.26022                  | 0.40799   | 0.33178 |
| 55-59     | 0.42214                | 0.43902   | 0.13884 | 0.26460                  | 0.38261   | 0.35280 |

**Table 62. Prevalent rates of lower socioeconomic status population by age group, gender, and body mass index category in 2010 (Central region)**

| Age Group | Nutritional State Male |           |         | Nutritional State Female |           |         |
|-----------|------------------------|-----------|---------|--------------------------|-----------|---------|
|           | Not-Overweigh          | Overweigh | Obese   | Not-Overweigh            | Overweigh | Obese   |
| 0-4       | 0.77744                | 0.18598   | 0.03659 | 0.74390                  | 0.20122   | 0.05488 |
| 5-9       | 0.82245                | 0.12010   | 0.05744 | 0.87216                  | 0.10227   | 0.02557 |
| 10-14     | 0.86006                | 0.10787   | 0.03207 | 0.86216                  | 0.10270   | 0.03514 |
| 15-19     | 0.87956                | 0.10219   | 0.01825 | 0.79630                  | 0.15432   | 0.04938 |
| 20-24     | 0.80000                | 0.13846   | 0.06154 | 0.72951                  | 0.18443   | 0.08607 |
| 25-29     | 0.65625                | 0.24375   | 0.10000 | 0.60699                  | 0.25764   | 0.13537 |
| 30-34     | 0.60843                | 0.28313   | 0.10843 | 0.40094                  | 0.36792   | 0.23113 |

|       |         |         |         |         |         |         |
|-------|---------|---------|---------|---------|---------|---------|
| 35-39 | 0.52174 | 0.36522 | 0.11304 | 0.37436 | 0.37436 | 0.25128 |
| 40-44 | 0.59016 | 0.33607 | 0.07377 | 0.29825 | 0.39766 | 0.30409 |
| 45-49 | 0.47826 | 0.38261 | 0.13913 | 0.36000 | 0.36000 | 0.28000 |
| 50-54 | 0.48598 | 0.41121 | 0.10280 | 0.25342 | 0.39726 | 0.34932 |
| 55-59 | 0.60000 | 0.35789 | 0.04211 | 0.74390 | 0.20122 | 0.05488 |

**Table 63. Prevalent rates of middle socioeconomic status population by age group, gender, and body mass index category in 2010 (Central region)**

| Age Group | Nutritional State Male |           |         | Nutritional State Female |           |         |
|-----------|------------------------|-----------|---------|--------------------------|-----------|---------|
|           | Not-Overweigh          | Overweigh | Obese   | Not-Overweigh            | Overweigh | Obese   |
| 0-4       | 0.75159                | 0.21444   | 0.03397 | 0.74641                  | 0.22249   | 0.03110 |
| 5-9       | 0.73814                | 0.16495   | 0.09691 | 0.79183                  | 0.14008   | 0.06809 |
| 10-14     | 0.78053                | 0.15076   | 0.06870 | 0.79779                  | 0.16544   | 0.03676 |
| 15-19     | 0.86019                | 0.10427   | 0.03555 | 0.82286                  | 0.13905   | 0.03810 |
| 20-24     | 0.78917                | 0.17379   | 0.03704 | 0.69167                  | 0.20833   | 0.10000 |
| 25-29     | 0.56610                | 0.34237   | 0.09153 | 0.55206                  | 0.27603   | 0.17191 |
| 30-34     | 0.42254                | 0.41549   | 0.16197 | 0.45902                  | 0.35792   | 0.18306 |
| 35-39     | 0.47210                | 0.42489   | 0.10300 | 0.36857                  | 0.40000   | 0.23143 |
| 40-44     | 0.37021                | 0.46383   | 0.16596 | 0.35150                  | 0.34877   | 0.29973 |
| 45-49     | 0.42678                | 0.43933   | 0.13389 | 0.30699                  | 0.41337   | 0.27964 |
| 50-54     | 0.39785                | 0.47312   | 0.12903 | 0.24847                  | 0.42025   | 0.33129 |
| 55-59     | 0.40506                | 0.42405   | 0.17089 | 0.27103                  | 0.35981   | 0.36916 |

**Table 64. Prevalent rates of higher socioeconomic status population by age group, gender, and body mass index category in 2010 (Central region)**

| Age Group | Nutritional State Male |           |         | Nutritional State Female |           |         |
|-----------|------------------------|-----------|---------|--------------------------|-----------|---------|
|           | Not-Overweigh          | Overweigh | Obese   | Not-Overweigh            | Overweigh | Obese   |
| 0-4       | 0.74686                | 0.20084   | 0.05230 | 0.74091                  | 0.19318   | 0.06591 |
| 5-9       | 0.70033                | 0.16722   | 0.13245 | 0.71609                  | 0.20434   | 0.07957 |
| 10-14     | 0.71807                | 0.19470   | 0.08723 | 0.76991                  | 0.19174   | 0.03835 |
| 15-19     | 0.86275                | 0.11011   | 0.02715 | 0.80343                  | 0.14248   | 0.05409 |
| 20-24     | 0.71308                | 0.22785   | 0.05907 | 0.71405                  | 0.22779   | 0.05816 |
| 25-29     | 0.52679                | 0.35938   | 0.11384 | 0.57790                  | 0.32428   | 0.09783 |
| 30-34     | 0.37784                | 0.44886   | 0.17330 | 0.53710                  | 0.31802   | 0.14488 |
| 35-39     | 0.33436                | 0.46319   | 0.20245 | 0.43411                  | 0.39147   | 0.17442 |
| 40-44     | 0.38902                | 0.44630   | 0.16468 | 0.37580                  | 0.41879   | 0.20541 |
| 45-49     | 0.31926                | 0.46966   | 0.21108 | 0.33229                  | 0.44462   | 0.22309 |
| 50-54     | 0.30539                | 0.52395   | 0.17066 | 0.26821                  | 0.40397   | 0.32781 |
| 55-59     | 0.37143                | 0.47500   | 0.15357 | 0.26122                  | 0.40000   | 0.33878 |

**Table 65 Fraction of births for men by body mass index category, gender, and socioeconomic status (Central region) †**



| Population group | Lower SES (%/year) | Middle SES (%/year) | Higher SES (%/year) | Complete Urban Population (%/year) |
|------------------|--------------------|---------------------|---------------------|------------------------------------|
| Not- overweight  | 85,48%             | 78,00%              | 85,51%              | 83,43%                             |
| Overweight       | 11,29%             | 12,00%              | 11,59%              | 11,60%                             |
| Obese            | 3,23%              | 10,00%              | 2,90%               | 4,97%                              |

† The fractions of births by each BMI category correspond to the prevalences by BMI category of children aged 0 to 12 months

**Table 66. Fraction of births for women by body mass index category and socioeconomic status (Central region) †**

| Population group | Lower SES (%/year) | Middle SES (%/year) | Higher SES (%/year) | Complete Urban Population (%/year) |
|------------------|--------------------|---------------------|---------------------|------------------------------------|
| Not- overweight  | 79,41%             | 82,22%              | 76,79%              | 79,26%                             |
| Overweight       | 17,65%             | 15,56%              | 19,64%              | 17,78%                             |
| Obese            | 2,94%              | 2,22%               | 3,57%               | 2,96%                              |

† The fractions of births by each BMI category correspond to the prevalences by BMI category of children aged 0 to 12 months

**Table 67. Mortality rates for men and population size by age group without segregate by socioeconomic status (Central region) †**

| Age group | Mortality rates (R) (%/year) | Not- overweight men in 2005 (Number of people) <sup>1</sup> | Overweight men in 2005 (Number of people) <sup>2</sup> | Obese men in 2005 (Number of people) <sup>3</sup> |
|-----------|------------------------------|-------------------------------------------------------------|--------------------------------------------------------|---------------------------------------------------|
| 0-4       | 0.00324                      | 273833                                                      | 59818                                                  | 23041                                             |
| 5-9       | 0.00036                      | 306621                                                      | 49671                                                  | 20059                                             |
| 10-14     | 0.00034                      | 328460                                                      | 53513                                                  | 14762                                             |
| 15-19     | 0.00167                      | 340495                                                      | 27975                                                  | 7194                                              |
| 20-24     | 0.00341                      | 257326                                                      | 48118                                                  | 16214                                             |
| 25-29     | 0.00337                      | 193447                                                      | 77497                                                  | 17747                                             |
| 30-34     | 0.00323                      | 130546                                                      | 98382                                                  | 26488                                             |
| 35-39     | 0.00309                      | 131476                                                      | 105947                                                 | 31273                                             |
| 40-44     | 0.00336                      | 122631                                                      | 112025                                                 | 28503                                             |
| 45-49     | 0.00443                      | 102487                                                      | 94643                                                  | 24576                                             |
| 50-54     | 0.00641                      | 79070                                                       | 80611                                                  | 19511                                             |
| 55-59     | 0.00895                      | 56890                                                       | 56368                                                  | 23487                                             |

† Values used in this table are for the urban population

<sup>1</sup> Initial value used in the stock of not-overweight population in 2005.

<sup>2</sup> Initial value used in the stock of overweight population in 2005.

<sup>3</sup> Initial value used in the stock of obese population in 2005.

**Table 68. Mortality rates for women and population size by age group without segregate by socioeconomic status (Central region) †**

| Age group | Mortality rates (R) (%/year) Female | Not- overweight women in 2005 (Number of people) <sup>1</sup> | Overweight women in 2005 (Number of people) <sup>2</sup> | Obese women in 2005 (Number of people) <sup>3</sup> |
|-----------|-------------------------------------|---------------------------------------------------------------|----------------------------------------------------------|-----------------------------------------------------|
| 0-4       | 0.00261                             | 268792                                                        | 58154                                                    | 16485                                               |
| 5-9       | 0.00024                             | 299977                                                        | 51300                                                    | 13042                                               |
| 10-14     | 0.00023                             | 319572                                                        | 48876                                                    | 17858                                               |
| 15-19     | 0.00047                             | 320020                                                        | 50787                                                    | 11014                                               |
| 20-24     | 0.00067                             | 267929                                                        | 60053                                                    | 19248                                               |
| 25-29     | 0.00058                             | 211777                                                        | 76719                                                    | 29169                                               |
| 30-34     | 0.00087                             | 161027                                                        | 92232                                                    | 35910                                               |

|       |         |        |        |       |
|-------|---------|--------|--------|-------|
| 35-39 | 0.00113 | 148473 | 110885 | 51120 |
| 40-44 | 0.00148 | 134466 | 111722 | 57856 |
| 45-49 | 0.00232 | 87754  | 104080 | 68366 |
| 50-54 | 0.00343 | 58805  | 88035  | 62932 |
| 55-59 | 0.00585 | 47432  | 68897  | 46047 |

†Values used in this table are for the urban population

<sup>1</sup> Initial value used in the stock of not-overweight population in 2005.

<sup>2</sup> Initial value used in the stock of overweight population in 2005.

<sup>3</sup> Initial value used in the stock of obese population in 2005.

**Table 69. Man mortality rates and population size by age group for the lower socioeconomic status population (Central region) †**

| Age group | Mortality rates (R) (%/year) | Not- overweight men in 2005 (Number of people) <sup>1</sup> | Overweight men in 2005 (Number of people) <sup>2</sup> | Obese men in 2005 (Number of people) <sup>3</sup> |
|-----------|------------------------------|-------------------------------------------------------------|--------------------------------------------------------|---------------------------------------------------|
| 0-4       | 0.00324                      | 83302                                                       | 18167                                                  | 5317                                              |
| 5-9       | 0.00036                      | 61133                                                       | 9552                                                   | 1910                                              |
| 10-14     | 0.00034                      | 71966                                                       | 9226                                                   | 923                                               |
| 15-19     | 0.00167                      | 71136                                                       | 3996                                                   | 0                                                 |
| 20-24     | 0.00341                      | 48641                                                       | 3661                                                   | 3138                                              |
| 25-29     | 0.00337                      | 43777                                                       | 13015                                                  | 1183                                              |
| 30-34     | 0.00323                      | 26488                                                       | 11352                                                  | 3784                                              |
| 35-39     | 0.00309                      | 29997                                                       | 8935                                                   | 3191                                              |
| 40-44     | 0.00336                      | 26515                                                       | 10606                                                  | 2651                                              |
| 45-49     | 0.00443                      | 21961                                                       | 15164                                                  | 1569                                              |
| 50-54     | 0.00641                      | 20024                                                       | 13863                                                  | 513                                               |
| 55-59     | 0.00895                      | 16702                                                       | 8873                                                   | 3132                                              |

†Values used in this table are for the urban population

<sup>1</sup> Initial value used in the stock of not-overweight population in 2005 for lower SES.

<sup>2</sup> Initial value used in the stock of overweight population in 2005 for lower SES.

<sup>3</sup> Initial value used in the stock of obese population in 2005 for lower SES.

**Table 70. Women mortality rates and population size by age group for the lower socioeconomic status population (Central region) †**

| Age group | Mortality rates (R) (%/year) | Not- overweight women in 2005 (Number of people) <sup>1</sup> | Overweight women in 2005 (Number of people) <sup>2</sup> | Obese women in 2005 (Number of people) <sup>3</sup> |
|-----------|------------------------------|---------------------------------------------------------------|----------------------------------------------------------|-----------------------------------------------------|
| 0-4       | 0.00261                      | 86404                                                         | 13998                                                    | 2414                                                |
| 5-9       | 0.00024                      | 60354                                                         | 9094                                                     | 827                                                 |
| 10-14     | 0.00023                      | 69562                                                         | 7996                                                     | 2399                                                |
| 15-19     | 0.00047                      | 62157                                                         | 13615                                                    | 592                                                 |
| 20-24     | 0.00067                      | 46278                                                         | 9743                                                     | 3827                                                |
| 25-29     | 0.00058                      | 41278                                                         | 14541                                                    | 7974                                                |
| 30-34     | 0.00087                      | 24374                                                         | 18525                                                    | 4225                                                |
| 35-39     | 0.00113                      | 18610                                                         | 20042                                                    | 10021                                               |
| 40-44     | 0.00148                      | 16790                                                         | 15464                                                    | 13697                                               |
| 45-49     | 0.00232                      | 18841                                                         | 19807                                                    | 6764                                                |
| 50-54     | 0.00343                      | 16532                                                         | 13989                                                    | 9750                                                |
| 55-59     | 0.00585                      | 14844                                                         | 9896                                                     | 9346                                                |

†Values used in this table are for the urban population

<sup>1</sup> Initial value used in the stock of not-overweight population in 2005 for lower SES.

<sup>2</sup> Initial value used in the stock of overweight population in 2005 for lower SES.

<sup>3</sup> Initial value used in the stock of obese population in 2005 for lower SES.

**Table 71. Man mortality rates and population size by age group for the middle socioeconomic status population (Central region) †**

| Age group | Mortality rates (R) (%/year) | Not- overweight men in 2005 (Number of people) <sup>1</sup> | Overweight men in 2005 (Number of people) <sup>2</sup> | Obese men in 2005 (Number of people) <sup>3</sup> |
|-----------|------------------------------|-------------------------------------------------------------|--------------------------------------------------------|---------------------------------------------------|
| 0-4       | 0.00324                      | 90392                                                       | 18610                                                  | 7976                                              |
| 5-9       | 0.00036                      | 106983                                                      | 15283                                                  | 6686                                              |
| 10-14     | 0.00034                      | 114407                                                      | 15685                                                  | 4613                                              |
| 15-19     | 0.00167                      | 93516                                                       | 9591                                                   | 2398                                              |
| 20-24     | 0.00341                      | 77930                                                       | 7322                                                   | 4707                                              |
| 25-29     | 0.00337                      | 56792                                                       | 16564                                                  | 5324                                              |
| 30-34     | 0.00323                      | 46038                                                       | 27749                                                  | 6307                                              |
| 35-39     | 0.00309                      | 39570                                                       | 32550                                                  | 7659                                              |
| 40-44     | 0.00336                      | 39109                                                       | 30492                                                  | 5966                                              |
| 45-49     | 0.00443                      | 31373                                                       | 19870                                                  | 7320                                              |
| 50-54     | 0.00641                      | 21051                                                       | 15917                                                  | 3081                                              |
| 55-59     | 0.00895                      | 13570                                                       | 11482                                                  | 3653                                              |

†Values used in this table are for the urban population

1 Initial value used in the stock of not-overweight population in 2005 for middle SES.

2 Initial value used in the stock of overweight population in 2005 for middle SES.

3 Initial value used in the stock of obese population in 2005 for middle SES.

**Table 72. Women mortality rates and population size by age group for the middle socioeconomic status population (Central region) †**

| Age group | Mortality rates (R) (%/year) | Not- overweight women in 2005 (Number of people) <sup>1</sup> | Overweight women in 2005 (Number of people) <sup>2</sup> | Obese women in 2005 (Number of people) <sup>3</sup> |
|-----------|------------------------------|---------------------------------------------------------------|----------------------------------------------------------|-----------------------------------------------------|
| 0-4       | 0.00261                      | 84588                                                         | 20563                                                    | 7477                                                |
| 5-9       | 0.00024                      | 104946                                                        | 13256                                                    | 6628                                                |
| 10-14     | 0.00023                      | 110178                                                        | 16789                                                    | 4197                                                |
| 15-19     | 0.00047                      | 93439                                                         | 10661                                                    | 3136                                                |
| 20-24     | 0.00067                      | 73115                                                         | 17623                                                    | 6374                                                |
| 25-29     | 0.00058                      | 54484                                                         | 22764                                                    | 9329                                                |
| 30-34     | 0.00087                      | 41817                                                         | 33454                                                    | 15406                                               |
| 35-39     | 0.00113                      | 43211                                                         | 31688                                                    | 17285                                               |
| 40-44     | 0.00148                      | 33507                                                         | 35867                                                    | 17933                                               |
| 45-49     | 0.00232                      | 19271                                                         | 32118                                                    | 17344                                               |
| 50-54     | 0.00343                      | 11638                                                         | 17955                                                    | 17290                                               |
| 55-59     | 0.00585                      | 9985                                                          | 14461                                                    | 9641                                                |

†Values used in this table are for the urban population

1 Initial value used in the stock of not-overweight population in 2005 for middle SES.

2 Initial value used in the stock of overweight population in 2005 for middle SES.

3 Initial value used in the stock of obese population in 2005 for middle SES.

**Table 73. Man mortality rates and population size by age group for the higher socioeconomic status population (Central region) †**

| Age group | Mortality rates (R) (%/year) | Not- overweight men in 2005 (Number of people) <sup>1</sup> | Overweight men in 2005 (Number of people) <sup>2</sup> | Obese men in 2005 (Number of people) <sup>3</sup> |
|-----------|------------------------------|-------------------------------------------------------------|--------------------------------------------------------|---------------------------------------------------|
| 0-4       | 0.00324                      | 100140                                                      | 23041                                                  | 9748                                              |
| 5-9       | 0.00036                      | 138505                                                      | 24835                                                  | 11462                                             |
| 10-14     | 0.00034                      | 142086                                                      | 28602                                                  | 9226                                              |
| 15-19     | 0.00167                      | 175843                                                      | 14387                                                  | 4796                                              |
| 20-24     | 0.00341                      | 130755                                                      | 37135                                                  | 8368                                              |
| 25-29     | 0.00337                      | 92878                                                       | 47918                                                  | 11240                                             |
| 30-34     | 0.00323                      | 58020                                                       | 59282                                                  | 16397                                             |
| 35-39     | 0.00309                      | 61909                                                       | 64462                                                  | 20423                                             |

|       |         |       |       |       |
|-------|---------|-------|-------|-------|
| 40-44 | 0.00336 | 57007 | 70927 | 19886 |
| 45-49 | 0.00443 | 49152 | 59610 | 15687 |
| 50-54 | 0.00641 | 37995 | 50831 | 15917 |
| 55-59 | 0.00895 | 26618 | 36013 | 16702 |

†Values used in this table are for the urban population

<sup>1</sup> Initial value used in the stock of not-overweight population in 2005 for higher SES.

<sup>2</sup> Initial value used in the stock of overweight population in 2005 for higher SES.

<sup>3</sup> Initial value used in the stock of obese population in 2005 for higher SES.

**Table 74. Women mortality rates and population size by age group for the higher socioeconomic status population (Central region) †**

| Age group | Mortality rates (R) (%/year) | Not- overweight women in 2005 (Number of people) <sup>1</sup> | Overweight women in 2005 (Number of people) <sup>2</sup> | Obese women in 2005 (Number of people) <sup>3</sup> |
|-----------|------------------------------|---------------------------------------------------------------|----------------------------------------------------------|-----------------------------------------------------|
| 0-4       | 0.00261                      | 98152                                                         | 23349                                                    | 6486                                                |
| 5-9       | 0.00024                      | 135525                                                        | 27564                                                    | 6125                                                |
| 10-14     | 0.00023                      | 139395                                                        | 24488                                                    | 11302                                               |
| 15-19     | 0.00047                      | 164573                                                        | 26307                                                    | 7342                                                |
| 20-24     | 0.00067                      | 148662                                                        | 32722                                                    | 8887                                                |
| 25-29     | 0.00058                      | 115971                                                        | 39179                                                    | 12146                                               |
| 30-34     | 0.00087                      | 93599                                                         | 40584                                                    | 17184                                               |
| 35-39     | 0.00113                      | 86630                                                         | 58966                                                    | 24023                                               |
| 40-44     | 0.00148                      | 82324                                                         | 61021                                                    | 27441                                               |
| 45-49     | 0.00232                      | 50816                                                         | 52733                                                    | 42506                                               |
| 50-54     | 0.00343                      | 31802                                                         | 55407                                                    | 35408                                               |
| 55-59     | 0.00585                      | 24774                                                         | 42514                                                    | 26915                                               |

†Values used in this table are for the urban population

<sup>1</sup> Initial value used in the stock of not-overweight population in 2005 for higher SES.

<sup>2</sup> Initial value used in the stock of overweight population in 2005 for higher SES.

<sup>3</sup> Initial value used in the stock of obese population in 2005 for higher SES.

**Table 75. Data and projections of the Fertility rates by department and Region (Central region) †**

| Year | Fecundity Rate Depto 05 | Fecundity Rate Depto 17 | Fecundity Rate Depto 18 | Fecundity Rate Depto 41 | Fecundity Rate Depto 63 | Fecundity Rate Depto 66 | Fecundity Rate Depto 73 | Average Fecundity Rate |
|------|-------------------------|-------------------------|-------------------------|-------------------------|-------------------------|-------------------------|-------------------------|------------------------|
| 2005 | 2,2791                  | 2,3096                  | 3,5656                  | 3,048                   | 2,2861                  | 2,2055                  | 2,7673                  | 2,637                  |
| 2006 | 2,2484                  | 2,2824                  | 3,5004                  | 2,9805                  | 2,2624                  | 2,182                   | 2,7292                  | 2,598                  |
| 2007 | 2,2177                  | 2,2552                  | 3,4352                  | 2,913                   | 2,2387                  | 2,1585                  | 2,6911                  | 2,558                  |
| 2008 | 2,187                   | 2,228                   | 3,37                    | 2,8455                  | 2,215                   | 2,135                   | 2,653                   | 2,519                  |
| 2009 | 2,1731                  | 2,2103                  | 3,3165                  | 2,8008                  | 2,2021                  | 2,125                   | 2,6222                  | 2,493                  |
| 2010 | 2,1592                  | 2,1926                  | 3,263                   | 2,7561                  | 2,1892                  | 2,115                   | 2,5914                  | 2,467                  |
| 2011 | 2,1453                  | 2,1749                  | 3,2095                  | 2,7114                  | 2,1763                  | 2,105                   | 2,5606                  | 2,440                  |
| 2012 | 2,1314                  | 2,1572                  | 3,156                   | 2,6667                  | 2,1634                  | 2,095                   | 2,5298                  | 2,414                  |
| 2013 | 2,1175                  | 2,1395                  | 3,1025                  | 2,622                   | 2,1505                  | 2,085                   | 2,499                   | 2,388                  |
| 2014 | 2,1117                  | 2,13                    | 3,0638                  | 2,5956                  | 2,1439                  | 2,0809                  | 2,478                   | 2,372                  |
| 2015 | 2,1059                  | 2,1205                  | 3,0251                  | 2,5692                  | 2,1373                  | 2,0768                  | 2,457                   | 2,356                  |
| 2016 | 2,1001                  | 2,111                   | 2,9864                  | 2,5428                  | 2,1307                  | 2,0727                  | 2,436                   | 2,340                  |
| 2017 | 2,0943                  | 2,1015                  | 2,9477                  | 2,5164                  | 2,1241                  | 2,0686                  | 2,415                   | 2,324                  |
| 2018 | 2,0885                  | 2,092                   | 2,909                   | 2,49                    | 2,1175                  | 2,0645                  | 2,394                   | 2,308                  |

| Year | Fecundity Rate Depto 05 | Fecundity Rate Depto 17 | Fecundity Rate Depto 18 | Fecundity Rate Depto 41 | Fecundity Rate Depto 63 | Fecundity Rate Depto 66 | Fecundity Rate Depto 73 | Average Fecundity Rate |
|------|-------------------------|-------------------------|-------------------------|-------------------------|-------------------------|-------------------------|-------------------------|------------------------|
| 2019 | 2,0827                  | 2,0825                  | 2,8703                  | 2,4636                  | 2,1109                  | 2,0604                  | 2,373                   | 2,292                  |
| 2020 | 2,0769                  | 2,073                   | 2,8316                  | 2,4372                  | 2,1043                  | 2,0563                  | 2,352                   | 2,276                  |
| 2021 | 2,0711                  | 2,0635                  | 2,7929                  | 2,4108                  | 2,0977                  | 2,0522                  | 2,331                   | 2,260                  |
| 2022 | 2,0653                  | 2,054                   | 2,7542                  | 2,3844                  | 2,0911                  | 2,0481                  | 2,31                    | 2,244                  |
| 2023 | 2,0595                  | 2,0445                  | 2,7155                  | 2,358                   | 2,0845                  | 2,044                   | 2,289                   | 2,228                  |
| 2024 | 2,0537                  | 2,035                   | 2,6768                  | 2,3316                  | 2,0779                  | 2,0399                  | 2,268                   | 2,212                  |
| 2025 | 2,0479                  | 2,0255                  | 2,6381                  | 2,3052                  | 2,0713                  | 2,0358                  | 2,247                   | 2,196                  |
| 2026 | 2,0421                  | 2,016                   | 2,5994                  | 2,2788                  | 2,0647                  | 2,0317                  | 2,226                   | 2,180                  |
| 2027 | 2,0363                  | 2,0065                  | 2,5607                  | 2,2524                  | 2,0581                  | 2,0276                  | 2,205                   | 2,164                  |
| 2028 | 2,0305                  | 1,997                   | 2,522                   | 2,226                   | 2,0515                  | 2,0235                  | 2,184                   | 2,148                  |
| 2029 | 2,0247                  | 1,9875                  | 2,4833                  | 2,1996                  | 2,0449                  | 2,0194                  | 2,163                   | 2,132                  |
| 2030 | 2,0189                  | 1,978                   | 2,4446                  | 2,1732                  | 2,0383                  | 2,0153                  | 2,142                   | 2,116                  |

† Data of Fertility rate of DANE [1] was used to forecast the department's fertility rate from 2005 to 2030. Holt-Winters no seasonal method in EViews 5 (Quantitative Micro Software, LLC) was used to forecast the fertility rate. In the SD model we used data from 2005 to 2030 and the region fertility rate was calculated as the average of all departments' fertility rates.

**Table 76. Fraction of births by departments, body mass index category, and socioeconomic status (Central region) †**

| Population group |                | Lower SES (%/year) | Middle SES (%/year) | Higher SES (%/year) | Complete Urban Population (%/year) |
|------------------|----------------|--------------------|---------------------|---------------------|------------------------------------|
| Department 5     | Not-overweight | 84,62%             | 76,19%              | 75,76%              | 78,75%                             |
|                  | Overweight     | 7,69%              | 19,05%              | 21,21%              | 16,25%                             |
|                  | Obese          | 7,69%              | 4,76%               | 3,03%               | 5,00%                              |
| Department 17    | Not-overweight | 83,33%             | 100,00%             | 88,89%              | 89,58%                             |
|                  | Overweight     | 16,67%             | 0,00%               | 11,11%              | 10,42%                             |
|                  | Obese          | 0,00%              | 0,00%               | 0,00%               | 0,00%                              |
| Department 18    | Not-overweight | 83,33%             | 100,00%             | 88,89%              | 89,58%                             |
|                  | Overweight     | 16,67%             | 0,00%               | 11,11%              | 10,42%                             |
|                  | Obese          | 0,00%              | 0,00%               | 0,00%               | 0,00%                              |
| Department 41    | Not-overweight | 93,33%             | 100,00%             | 100,00%             | 97,78%                             |
|                  | Overweight     | 6,67%              | 0,00%               | 0,00%               | 2,22%                              |
|                  | Obese          | 0,00%              | 0,00%               | 0,00%               | 0,00%                              |
| Department 63    | Not-overweight | 100,00%            | 86,67%              | 72,22%              | 82,50%                             |
|                  | Overweight     | 0,00%              | 13,33%              | 16,67%              | 12,50%                             |
|                  | Obese          | 0,00%              | 0,00%               | 11,11%              | 5,00%                              |
| Department 66    | Not-overweight | 84,62%             | 76,19%              | 75,76%              | 78,75%                             |
|                  | Overweight     | 7,69%              | 19,05%              | 21,21%              | 16,25%                             |
|                  | Obese          | 7,69%              | 4,76%               | 3,03%               | 5,00%                              |
| Department 73    | Not-overweight | 60,00%             | 69,57%              | 76,47%              | 69,09%                             |
|                  | Overweight     | 33,33%             | 17,39%              | 23,53%              | 23,64%                             |
|                  | Obese          | 6,67%              | 13,04%              | 0,00%               | 7,27%                              |

† The fractions of births by each BMI category correspond to the prevalences by BMI category of children aged

0 to 12 months

**Table 77. Prevalent rates of entire population by age group, and body mass index category (Central region)**

| Departments   | Age group | Not- overweight in 2005 | Overweight in 2005 | Obese in 2005 | Not- overweight in 2010 | Overweight in 2010 | Obese in 2010 |
|---------------|-----------|-------------------------|--------------------|---------------|-------------------------|--------------------|---------------|
| Department 5  | 0-4       | 0.83732                 | 0.11005            | 0.05263       | 0.74096                 | 0.22139            | 0.03765       |
|               | 5-9       | 0.83732                 | 0.11005            | 0.05263       | 0.74119                 | 0.17751            | 0.08130       |
|               | 10-14     | 0.83691                 | 0.11159            | 0.05150       | 0.79765                 | 0.14941            | 0.05294       |
|               | 15-19     | 0.86711                 | 0.11628            | 0.01661       | 0.83252                 | 0.12136            | 0.04612       |
|               | 20-24     | 0.78987                 | 0.16456            | 0.04557       | 0.75272                 | 0.18750            | 0.05978       |
|               | 25-29     | 0.69325                 | 0.23926            | 0.06748       | 0.59807                 | 0.31672            | 0.08521       |
|               | 30-34     | 0.55319                 | 0.33333            | 0.11348       | 0.46724                 | 0.38276            | 0.15000       |
|               | 35-39     | 0.46687                 | 0.40060            | 0.13253       | 0.40039                 | 0.43195            | 0.16765       |
|               | 40-44     | 0.52381                 | 0.34603            | 0.13016       | 0.37862                 | 0.42935            | 0.19203       |
|               | 45-49     | 0.43949                 | 0.38854            | 0.17197       | 0.40541                 | 0.41261            | 0.18198       |
|               | 50-54     | 0.40249                 | 0.39834            | 0.19917       | 0.30097                 | 0.45243            | 0.24660       |
| 55-59         | 0.40113   | 0.39548                 | 0.20339            | 0.36705       | 0.39306                 | 0.23988            |               |
| Department 17 | 0-4       | 0.71724                 | 0.15172            | 0.13103       | 0.77470                 | 0.18972            | 0.03557       |
|               | 5-9       | 0.87671                 | 0.10959            | 0.01370       | 0.74859                 | 0.15254            | 0.09887       |
|               | 10-14     | 0.81707                 | 0.17073            | 0.01220       | 0.80000                 | 0.15802            | 0.04198       |
|               | 15-19     | 0.88462                 | 0.07692            | 0.03846       | 0.86190                 | 0.11429            | 0.02381       |
|               | 20-24     | 0.79167                 | 0.15476            | 0.05357       | 0.74845                 | 0.21118            | 0.04037       |
|               | 25-29     | 0.75000                 | 0.16379            | 0.08621       | 0.55918                 | 0.33061            | 0.11020       |
|               | 30-34     | 0.62185                 | 0.28571            | 0.09244       | 0.47917                 | 0.35000            | 0.17083       |
|               | 35-39     | 0.53623                 | 0.33333            | 0.13043       | 0.39922                 | 0.42248            | 0.17829       |
|               | 40-44     | 0.39695                 | 0.48855            | 0.11450       | 0.45588                 | 0.33824            | 0.20588       |
|               | 45-49     | 0.41818                 | 0.40000            | 0.18182       | 0.35985                 | 0.43939            | 0.20076       |
|               | 50-54     | 0.31068                 | 0.51456            | 0.17476       | 0.32031                 | 0.45703            | 0.22266       |
| 55-59         | 0.37624   | 0.34653                 | 0.27723            | 0.39791       | 0.37696                 | 0.22513            |               |
| Department 18 | 0-4       | 0.80702                 | 0.17105            | 0.02193       | 0.76923                 | 0.20000            | 0.03077       |
|               | 5-9       | 0.81579                 | 0.14474            | 0.03947       | 0.79252                 | 0.12925            | 0.07823       |
|               | 10-14     | 0.86765                 | 0.10294            | 0.02941       | 0.79016                 | 0.15410            | 0.05574       |
|               | 15-19     | 0.81188                 | 0.14851            | 0.03960       | 0.79839                 | 0.14919            | 0.05242       |
|               | 20-24     | 0.77640                 | 0.13043            | 0.09317       | 0.63291                 | 0.28481            | 0.08228       |
|               | 25-29     | 0.66400                 | 0.22400            | 0.11200       | 0.52542                 | 0.32203            | 0.15254       |
|               | 30-34     | 0.50420                 | 0.30252            | 0.19328       | 0.36000                 | 0.40571            | 0.23429       |
|               | 35-39     | 0.37647                 | 0.34118            | 0.28235       | 0.30469                 | 0.45313            | 0.24219       |
|               | 40-44     | 0.40476                 | 0.35714            | 0.23810       | 0.25197                 | 0.49606            | 0.25197       |
|               | 45-49     | 0.31169                 | 0.36364            | 0.32468       | 0.26667                 | 0.33333            | 0.40000       |
|               | 50-54     | 0.22667                 | 0.44000            | 0.33333       | 0.17355                 | 0.43802            | 0.38843       |
| 55-59         | 0.34043   | 0.34043                 | 0.31915            | 0.26250       | 0.38750                 | 0.35000            |               |
| Department 41 | 0-4       | 0.67130                 | 0.24074            | 0.08796       | 0.77959                 | 0.17551            | 0.04490       |
|               | 5-9       | 0.78571                 | 0.15873            | 0.05556       | 0.76015                 | 0.14391            | 0.09594       |
|               | 10-14     | 0.76316                 | 0.15789            | 0.07895       | 0.73256                 | 0.17442            | 0.09302       |
|               | 15-19     | 0.78992                 | 0.18487            | 0.02521       | 0.81227                 | 0.14440            | 0.04332       |
|               | 20-24     | 0.70000                 | 0.22500            | 0.07500       | 0.67347                 | 0.20408            | 0.12245       |

| Departments      | Age group        | Not- overweight<br>in 2005 | Overweight<br>in 2005 | Obese in<br>2005 | Not- overweight<br>in 2010 | Overweight<br>in 2010 | Obese in<br>2010 |
|------------------|------------------|----------------------------|-----------------------|------------------|----------------------------|-----------------------|------------------|
|                  | 25-29            | 0.56115                    | 0.33813               | 0.10072          | 0.51445                    | 0.30636               | 0.17919          |
|                  | 30-34            | 0.48428                    | 0.40881               | 0.10692          | 0.45882                    | 0.34118               | 0.20000          |
|                  | 35-39            | 0.40816                    | 0.40816               | 0.18367          | 0.38571                    | 0.37143               | 0.24286          |
|                  | 40-44            | 0.33813                    | 0.45324               | 0.20863          | 0.25984                    | 0.39370               | 0.34646          |
|                  | 45-49            | 0.23881                    | 0.45522               | 0.30597          | 0.18978                    | 0.53285               | 0.27737          |
|                  | 50-54            | 0.26786                    | 0.43750               | 0.29464          | 0.20930                    | 0.47287               | 0.31783          |
|                  | 55-59            | 0.25000                    | 0.43750               | 0.31250          | 0.25000                    | 0.41667               | 0.33333          |
| Department<br>63 | 0-4              | 0.76531                    | 0.17347               | 0.06122          | 0.74093                    | 0.20984               | 0.04922          |
|                  | 5-9              | 0.75893                    | 0.19643               | 0.04464          | 0.78497                    | 0.13987               | 0.07516          |
|                  | 10-14            | 0.85470                    | 0.12821               | 0.01709          | 0.78261                    | 0.17202               | 0.04537          |
|                  | 15-19            | 0.90604                    | 0.06040               | 0.03356          | 0.83559                    | 0.12959               | 0.03482          |
|                  | 20-24            | 0.81702                    | 0.15319               | 0.02979          | 0.73990                    | 0.18939               | 0.07071          |
|                  | 25-29            | 0.65652                    | 0.28261               | 0.06087          | 0.54593                    | 0.33333               | 0.12073          |
|                  | 30-34            | 0.59172                    | 0.32544               | 0.08284          | 0.50000                    | 0.38050               | 0.11950          |
|                  | 35-39            | 0.51208                    | 0.35749               | 0.13043          | 0.43599                    | 0.39100               | 0.17301          |
|                  | 40-44            | 0.52404                    | 0.29327               | 0.18269          | 0.39106                    | 0.38547               | 0.22346          |
|                  | 45-49            | 0.41627                    | 0.41148               | 0.17225          | 0.36792                    | 0.43082               | 0.20126          |
|                  | 50-54            | 0.37126                    | 0.43713               | 0.19162          | 0.34516                    | 0.39677               | 0.25806          |
|                  | 55-59            | 0.30370                    | 0.47407               | 0.22222          | 0.30000                    | 0.41071               | 0.28929          |
|                  | Department<br>66 | 0-4                        | 0.76531               | 0.17347          | 0.06122                    | 0.75146               | 0.19298          |
| 5-9              |                  | 0.75893                    | 0.19643               | 0.04464          | 0.75234                    | 0.15888               | 0.08879          |
| 10-14            |                  | 0.85470                    | 0.12821               | 0.01709          | 0.78959                    | 0.16742               | 0.04299          |
| 15-19            |                  | 0.90604                    | 0.06040               | 0.03356          | 0.85412                    | 0.11529               | 0.03059          |
| 20-24            |                  | 0.81702                    | 0.15319               | 0.02979          | 0.75068                    | 0.20000               | 0.04932          |
| 25-29            |                  | 0.65652                    | 0.28261               | 0.06087          | 0.60188                    | 0.28213               | 0.11599          |
| 30-34            |                  | 0.59172                    | 0.32544               | 0.08284          | 0.53974                    | 0.30795               | 0.15232          |
| 35-39            |                  | 0.51208                    | 0.35749               | 0.13043          | 0.47101                    | 0.38406               | 0.14493          |
| 40-44            |                  | 0.52404                    | 0.29327               | 0.18269          | 0.42593                    | 0.41049               | 0.16358          |
| 45-49            |                  | 0.41627                    | 0.41148               | 0.17225          | 0.38276                    | 0.42759               | 0.18966          |
| 50-54            |                  | 0.37126                    | 0.43713               | 0.19162          | 0.36161                    | 0.41518               | 0.22321          |
| 55-59            |                  | 0.30841                    | 0.48598               | 0.20561          | 0.31579                    | 0.45175               | 0.23246          |
| Department<br>73 |                  | 0-4                        | 0.67130               | 0.24074          | 0.08796                    | 0.72204               | 0.20767          |
|                  | 5-9              | 0.78571                    | 0.15873               | 0.05556          | 0.78593                    | 0.15596               | 0.05810          |
|                  | 10-14            | 0.76316                    | 0.15789               | 0.07895          | 0.78526                    | 0.16346               | 0.05128          |
|                  | 15-19            | 0.78992                    | 0.18487               | 0.02521          | 0.81961                    | 0.13725               | 0.04314          |
|                  | 20-24            | 0.70000                    | 0.22500               | 0.07500          | 0.67895                    | 0.22632               | 0.09474          |
|                  | 25-29            | 0.56115                    | 0.33813               | 0.10072          | 0.57222                    | 0.26667               | 0.16111          |
|                  | 30-34            | 0.48428                    | 0.40881               | 0.10692          | 0.38509                    | 0.39130               | 0.22360          |
|                  | 35-39            | 0.40816                    | 0.40816               | 0.18367          | 0.36496                    | 0.36496               | 0.27007          |
|                  | 40-44            | 0.33813                    | 0.45324               | 0.20863          | 0.34066                    | 0.45604               | 0.20330          |
|                  | 45-49            | 0.23881                    | 0.45522               | 0.30597          | 0.23913                    | 0.47826               | 0.28261          |
|                  | 50-54            | 0.26786                    | 0.43750               | 0.29464          | 0.23649                    | 0.44595               | 0.31757          |
|                  | 55-59            | 0.25000                    | 0.43750               | 0.31250          | 0.28682                    | 0.38760               | 0.32558          |

**Table 78. Prevalent rates of lower socioeconomic status population by age group, and body mass index category (Central region)**

| Departments   | Age group | Not- overweight in 2005 | Overweight in 2005 | Obese in 2005 | Not- overweight in 2010 | Overweight in 2010 | Obese in 2010 |
|---------------|-----------|-------------------------|--------------------|---------------|-------------------------|--------------------|---------------|
| Department 5  | 0-4       | 0.85294                 | 0.11765            | 0.02941       | 0.75978                 | 0.18994            | 0.05028       |
|               | 5-9       | 0.85294                 | 0.11765            | 0.02941       | 0.87425                 | 0.10778            | 0.01796       |
|               | 10-14     | 0.88235                 | 0.09804            | 0.01961       | 0.87166                 | 0.09626            | 0.03209       |
|               | 15-19     | 0.88406                 | 0.11594            | 0.00000       | 0.82609                 | 0.13043            | 0.04348       |
|               | 20-24     | 0.77778                 | 0.13889            | 0.08333       | 0.80000                 | 0.13600            | 0.06400       |
|               | 25-29     | 0.61404                 | 0.33333            | 0.05263       | 0.66337                 | 0.25743            | 0.07921       |
|               | 30-34     | 0.43902                 | 0.41463            | 0.14634       | 0.45745                 | 0.35106            | 0.19149       |
|               | 35-39     | 0.46939                 | 0.42857            | 0.10204       | 0.39241                 | 0.39241            | 0.21519       |
|               | 40-44     | 0.44000                 | 0.34000            | 0.22000       | 0.38667                 | 0.42667            | 0.18667       |
|               | 45-49     | 0.46000                 | 0.42000            | 0.12000       | 0.45714                 | 0.32857            | 0.21429       |
|               | 50-54     | 0.56522                 | 0.32609            | 0.10870       | 0.39655                 | 0.41379            | 0.18966       |
| 55-59         | 0.55556   | 0.25926                 | 0.18519            | 0.54902       | 0.33333                 | 0.11765            |               |
| Department 17 | 0-4       | 0.68421                 | 0.28947            | 0.02632       | 0.81538                 | 0.15385            | 0.03077       |
|               | 5-9       | 0.91667                 | 0.08333            | 0.00000       | 0.84158                 | 0.08911            | 0.06931       |
|               | 10-14     | 0.75000                 | 0.25000            | 0.00000       | 0.86735                 | 0.10204            | 0.03061       |
|               | 15-19     | 0.93750                 | 0.06250            | 0.00000       | 0.88372                 | 0.11628            | 0.00000       |
|               | 20-24     | 0.76000                 | 0.20000            | 0.04000       | 0.80822                 | 0.15068            | 0.04110       |
|               | 25-29     | 0.84000                 | 0.12000            | 0.04000       | 0.62791                 | 0.25581            | 0.11628       |
|               | 30-34     | 0.61111                 | 0.27778            | 0.11111       | 0.58696                 | 0.30435            | 0.10870       |
|               | 35-39     | 0.63158                 | 0.26316            | 0.10526       | 0.46000                 | 0.34000            | 0.20000       |
|               | 40-44     | 0.14286                 | 0.57143            | 0.28571       | 0.51020                 | 0.28571            | 0.20408       |
|               | 45-49     | 0.56000                 | 0.40000            | 0.04000       | 0.37500                 | 0.39583            | 0.22917       |
|               | 50-54     | 0.46154                 | 0.38462            | 0.15385       | 0.43182                 | 0.38636            | 0.18182       |
| 55-59         | 0.52381   | 0.19048                 | 0.28571            | 0.38710       | 0.35484                 | 0.25806            |               |
| Department 18 | 0-4       | 0.77778                 | 0.20000            | 0.02222       | 0.75362                 | 0.21014            | 0.03623       |
|               | 5-9       | 0.77273                 | 0.18182            | 0.04545       | 0.81646                 | 0.12658            | 0.05696       |
|               | 10-14     | 0.84000                 | 0.12000            | 0.04000       | 0.81395                 | 0.12791            | 0.05814       |
|               | 15-19     | 0.74074                 | 0.22222            | 0.03704       | 0.78358                 | 0.14925            | 0.06716       |
|               | 20-24     | 0.88000                 | 0.06000            | 0.06000       | 0.69118                 | 0.22059            | 0.08824       |
|               | 25-29     | 0.70000                 | 0.23333            | 0.06667       | 0.56250                 | 0.30000            | 0.13750       |
|               | 30-34     | 0.53125                 | 0.34375            | 0.12500       | 0.38947                 | 0.38947            | 0.22105       |
|               | 35-39     | 0.20000                 | 0.48000            | 0.32000       | 0.30159                 | 0.41270            | 0.28571       |
|               | 40-44     | 0.33333                 | 0.50000            | 0.16667       | 0.26923                 | 0.48077            | 0.25000       |
|               | 45-49     | 0.53846                 | 0.30769            | 0.15385       | 0.33333                 | 0.41667            | 0.25000       |
|               | 50-54     | 0.35000                 | 0.40000            | 0.25000       | 0.22951                 | 0.40984            | 0.36066       |
| 55-59         | 0.50000   | 0.35714                 | 0.14286            | 0.27273       | 0.48485                 | 0.24242            |               |
| Department 41 | 0-4       | 0.70769                 | 0.20000            | 0.09231       | 0.72308                 | 0.24615            | 0.03077       |
|               | 5-9       | 0.82609                 | 0.17391            | 0.00000       | 0.84211                 | 0.12281            | 0.03509       |
|               | 10-14     | 0.88889                 | 0.11111            | 0.00000       | 0.91667                 | 0.08333            | 0.00000       |
|               | 15-19     | 0.80769                 | 0.19231            | 0.00000       | 0.85714                 | 0.11905            | 0.02381       |
|               | 20-24     | 0.68966                 | 0.20690            | 0.10345       | 0.72222                 | 0.11111            | 0.16667       |
|               | 25-29     | 0.70370                 | 0.25926            | 0.03704       | 0.58621                 | 0.24138            | 0.17241       |
|               | 30-34     | 0.53333                 | 0.43333            | 0.03333       | 0.51613                 | 0.25806            | 0.22581       |



| Departments   | Age group | Not- overweight in 2005 | Overweight in 2005 | Obese in 2005 | Not- overweight in 2010 | Overweight in 2010 | Obese in 2010 |
|---------------|-----------|-------------------------|--------------------|---------------|-------------------------|--------------------|---------------|
|               | 35-39     | 0.42105                 | 0.42105            | 0.15789       | 0.45000                 | 0.45000            | 0.10000       |
|               | 40-44     | 0.52941                 | 0.17647            | 0.29412       | 0.50000                 | 0.35714            | 0.14286       |
|               | 45-49     | 0.29412                 | 0.58824            | 0.11765       | 0.25000                 | 0.50000            | 0.25000       |
|               | 50-54     | 0.26667                 | 0.53333            | 0.20000       | 0.14286                 | 0.57143            | 0.28571       |
|               | 55-59     | 0.45455                 | 0.27273            | 0.27273       | 0.35714                 | 0.14286            | 0.50000       |
| Department 63 | 0-4       | 0.92405                 | 0.05063            | 0.02532       | 0.77551                 | 0.16327            | 0.06122       |
|               | 5-9       | 0.87879                 | 0.12121            | 0.00000       | 0.85185                 | 0.09877            | 0.04938       |
|               | 10-14     | 0.96552                 | 0.03448            | 0.00000       | 0.85915                 | 0.11268            | 0.02817       |
|               | 15-19     | 0.87500                 | 0.12500            | 0.00000       | 0.87097                 | 0.11290            | 0.01613       |
|               | 20-24     | 0.89655                 | 0.10345            | 0.00000       | 0.77273                 | 0.22727            | 0.00000       |
|               | 25-29     | 0.63158                 | 0.23684            | 0.13158       | 0.59184                 | 0.30612            | 0.10204       |
|               | 30-34     | 0.59459                 | 0.35135            | 0.05405       | 0.55000                 | 0.35000            | 0.10000       |
|               | 35-39     | 0.58974                 | 0.28205            | 0.12821       | 0.51429                 | 0.37143            | 0.11429       |
|               | 40-44     | 0.43478                 | 0.26087            | 0.30435       | 0.45000                 | 0.35000            | 0.20000       |
|               | 45-49     | 0.45000                 | 0.45000            | 0.10000       | 0.41176                 | 0.35294            | 0.23529       |
|               | 50-54     | 0.54545                 | 0.36364            | 0.09091       | 0.43478                 | 0.30435            | 0.26087       |
|               | 55-59     | 0.28571                 | 0.42857            | 0.28571       | 0.42308                 | 0.30769            | 0.26923       |
| Department 66 | 0-4       | 0.92405                 | 0.05063            | 0.02532       | 0.78873                 | 0.18310            | 0.02817       |
|               | 5-9       | 0.87879                 | 0.12121            | 0.00000       | 0.83750                 | 0.12500            | 0.03750       |
|               | 10-14     | 0.96552                 | 0.03448            | 0.00000       | 0.92754                 | 0.07246            | 0.00000       |
|               | 15-19     | 0.87500                 | 0.12500            | 0.00000       | 0.86207                 | 0.10345            | 0.03448       |
|               | 20-24     | 0.89655                 | 0.10345            | 0.00000       | 0.77358                 | 0.15094            | 0.07547       |
|               | 25-29     | 0.63158                 | 0.23684            | 0.13158       | 0.67442                 | 0.23256            | 0.09302       |
|               | 30-34     | 0.59459                 | 0.35135            | 0.05405       | 0.65116                 | 0.20930            | 0.13953       |
|               | 35-39     | 0.58974                 | 0.28205            | 0.12821       | 0.58065                 | 0.35484            | 0.06452       |
|               | 40-44     | 0.43478                 | 0.26087            | 0.30435       | 0.61765                 | 0.32353            | 0.05882       |
|               | 45-49     | 0.45000                 | 0.45000            | 0.10000       | 0.50000                 | 0.30000            | 0.20000       |
|               | 50-54     | 0.54545                 | 0.36364            | 0.09091       | 0.57143                 | 0.33333            | 0.09524       |
|               | 55-59     | 0.28571                 | 0.42857            | 0.28571       | 0.43478                 | 0.43478            | 0.13043       |
| Department 73 | 0-4       | 0.70769                 | 0.20000            | 0.09231       | 0.73034                 | 0.19101            | 0.07865       |
|               | 5-9       | 0.82609                 | 0.17391            | 0.00000       | 0.85714                 | 0.10989            | 0.03297       |
|               | 10-14     | 0.88889                 | 0.11111            | 0.00000       | 0.83824                 | 0.11765            | 0.04412       |
|               | 15-19     | 0.80769                 | 0.19231            | 0.00000       | 0.81818                 | 0.16364            | 0.01818       |
|               | 20-24     | 0.68966                 | 0.20690            | 0.10345       | 0.67500                 | 0.17500            | 0.15000       |
|               | 25-29     | 0.70370                 | 0.25926            | 0.03704       | 0.68182                 | 0.11364            | 0.20455       |
|               | 30-34     | 0.53333                 | 0.43333            | 0.03333       | 0.44828                 | 0.34483            | 0.20690       |
|               | 35-39     | 0.42105                 | 0.42105            | 0.15789       | 0.46875                 | 0.25000            | 0.28125       |
|               | 40-44     | 0.52941                 | 0.17647            | 0.29412       | 0.31034                 | 0.27586            | 0.41379       |
|               | 45-49     | 0.29412                 | 0.58824            | 0.11765       | 0.45161                 | 0.38710            | 0.16129       |
|               | 50-54     | 0.26667                 | 0.53333            | 0.20000       | 0.28125                 | 0.43750            | 0.28125       |
|               | 55-59     | 0.45455                 | 0.27273            | 0.27273       | 0.50000                 | 0.27778            | 0.22222       |

**Table 79. Prevalent rates of middle socioeconomic status population by age group, and body mass index category (Central region)**

| Departments      | Age group | Not- overweight<br>in 2005 | Overweight<br>in 2005 | Obese in<br>2005 | Not- overweight<br>in 2010 | Overweight<br>in 2010 | Obese in<br>2010 |
|------------------|-----------|----------------------------|-----------------------|------------------|----------------------------|-----------------------|------------------|
| Department<br>5  | 0-4       | 0.85294                    | 0.11765               | 0.02941          | 0.72464                    | 0.26570               | 0.00966          |
|                  | 5-9       | 0.85294                    | 0.11765               | 0.02941          | 0.72566                    | 0.18142               | 0.09292          |
|                  | 10-14     | 0.88235                    | 0.09804               | 0.01961          | 0.82022                    | 0.13483               | 0.04494          |
|                  | 15-19     | 0.88406                    | 0.11594               | 0.00000          | 0.85774                    | 0.09623               | 0.04603          |
|                  | 20-24     | 0.77778                    | 0.13889               | 0.08333          | 0.78509                    | 0.17544               | 0.03947          |
|                  | 25-29     | 0.61404                    | 0.33333               | 0.05263          | 0.59896                    | 0.31250               | 0.08854          |
|                  | 30-34     | 0.43902                    | 0.41463               | 0.14634          | 0.42623                    | 0.42623               | 0.14754          |
|                  | 35-39     | 0.46939                    | 0.42857               | 0.10204          | 0.47682                    | 0.37748               | 0.14570          |
|                  | 40-44     | 0.44000                    | 0.34000               | 0.22000          | 0.36306                    | 0.35032               | 0.28662          |
|                  | 45-49     | 0.46000                    | 0.42000               | 0.12000          | 0.42857                    | 0.39456               | 0.17687          |
|                  | 50-54     | 0.56522                    | 0.32609               | 0.10870          | 0.29861                    | 0.44444               | 0.25694          |
| 55-59            | 0.55556   | 0.25926                    | 0.18519               | 0.35526          | 0.39474                    | 0.25000               |                  |
| Department<br>17 | 0-4       | 0.69231                    | 0.15385               | 0.15385          | 0.73034                    | 0.22472               | 0.04494          |
|                  | 5-9       | 0.84000                    | 0.16000               | 0.00000          | 0.79439                    | 0.14019               | 0.06542          |
|                  | 10-14     | 0.82143                    | 0.17857               | 0.00000          | 0.83471                    | 0.10744               | 0.05785          |
|                  | 15-19     | 0.88000                    | 0.08000               | 0.04000          | 0.84559                    | 0.11765               | 0.03676          |
|                  | 20-24     | 0.84783                    | 0.10870               | 0.04348          | 0.71765                    | 0.20000               | 0.08235          |
|                  | 25-29     | 0.74194                    | 0.19355               | 0.06452          | 0.48684                    | 0.35526               | 0.15789          |
|                  | 30-34     | 0.63636                    | 0.30303               | 0.06061          | 0.47826                    | 0.33696               | 0.18478          |
|                  | 35-39     | 0.50000                    | 0.44444               | 0.05556          | 0.36364                    | 0.38961               | 0.24675          |
|                  | 40-44     | 0.34483                    | 0.55172               | 0.10345          | 0.43590                    | 0.38462               | 0.17949          |
|                  | 45-49     | 0.40000                    | 0.51429               | 0.08571          | 0.33766                    | 0.46753               | 0.19481          |
|                  | 50-54     | 0.26087                    | 0.43478               | 0.30435          | 0.25882                    | 0.51765               | 0.22353          |
| 55-59            | 0.45455   | 0.45455                    | 0.09091               | 0.49153          | 0.28814                    | 0.22034               |                  |
| Department<br>18 | 0-4       | 0.77778                    | 0.20000               | 0.02222          | 0.79048                    | 0.19048               | 0.01905          |
|                  | 5-9       | 0.77273                    | 0.18182               | 0.04545          | 0.77273                    | 0.14545               | 0.08182          |
|                  | 10-14     | 0.84000                    | 0.12000               | 0.04000          | 0.77679                    | 0.16964               | 0.05357          |
|                  | 15-19     | 0.74074                    | 0.22222               | 0.03704          | 0.81395                    | 0.16279               | 0.02326          |
|                  | 20-24     | 0.88000                    | 0.06000               | 0.06000          | 0.67164                    | 0.25373               | 0.07463          |
|                  | 25-29     | 0.70000                    | 0.23333               | 0.06667          | 0.47945                    | 0.34247               | 0.17808          |
|                  | 30-34     | 0.53125                    | 0.34375               | 0.12500          | 0.32258                    | 0.43548               | 0.24194          |
|                  | 35-39     | 0.20000                    | 0.48000               | 0.32000          | 0.32692                    | 0.48077               | 0.19231          |
|                  | 40-44     | 0.33333                    | 0.50000               | 0.16667          | 0.28070                    | 0.50877               | 0.21053          |
|                  | 45-49     | 0.53846                    | 0.30769               | 0.15385          | 0.24074                    | 0.31481               | 0.44444          |
|                  | 50-54     | 0.35000                    | 0.40000               | 0.25000          | 0.07143                    | 0.52381               | 0.40476          |
| 55-59            | 0.50000   | 0.35714                    | 0.14286               | 0.30303          | 0.36364                    | 0.33333               |                  |
| Department<br>41 | 0-4       | 0.70769                    | 0.20000               | 0.09231          | 0.78571                    | 0.14286               | 0.07143          |
|                  | 5-9       | 0.82609                    | 0.17391               | 0.00000          | 0.78641                    | 0.11650               | 0.09709          |
|                  | 10-14     | 0.88889                    | 0.11111               | 0.00000          | 0.70297                    | 0.18812               | 0.10891          |
|                  | 15-19     | 0.80769                    | 0.19231               | 0.00000          | 0.73636                    | 0.19091               | 0.07273          |
|                  | 20-24     | 0.68966                    | 0.20690               | 0.10345          | 0.62791                    | 0.24419               | 0.12791          |
|                  | 25-29     | 0.70370                    | 0.25926               | 0.03704          | 0.56250                    | 0.25000               | 0.18750          |
|                  | 30-34     | 0.53333                    | 0.43333               | 0.03333          | 0.44898                    | 0.32653               | 0.22449          |
|                  | 35-39     | 0.42105                    | 0.42105               | 0.15789          | 0.27660                    | 0.42553               | 0.29787          |
| 40-44            | 0.52941   | 0.17647                    | 0.29412               | 0.18000          | 0.42000                    | 0.40000               |                  |

| Departments      | Age group | Not- overweight<br>in 2005 | Overweight<br>in 2005 | Obese in<br>2005 | Not- overweight<br>in 2010 | Overweight<br>in 2010 | Obese in<br>2010 |
|------------------|-----------|----------------------------|-----------------------|------------------|----------------------------|-----------------------|------------------|
|                  | 45-49     | 0.29412                    | 0.58824               | 0.11765          | 0.19608                    | 0.52941               | 0.27451          |
|                  | 50-54     | 0.26667                    | 0.53333               | 0.20000          | 0.22222                    | 0.51111               | 0.26667          |
|                  | 55-59     | 0.45455                    | 0.27273               | 0.27273          | 0.19231                    | 0.46154               | 0.34615          |
| Department<br>63 | 0-4       | 0.92405                    | 0.05063               | 0.02532          | 0.74684                    | 0.20886               | 0.04430          |
|                  | 5-9       | 0.87879                    | 0.12121               | 0.00000          | 0.77895                    | 0.14211               | 0.07895          |
|                  | 10-14     | 0.96552                    | 0.03448               | 0.00000          | 0.78713                    | 0.17327               | 0.03960          |
|                  | 15-19     | 0.87500                    | 0.12500               | 0.00000          | 0.87647                    | 0.10588               | 0.01765          |
|                  | 20-24     | 0.89655                    | 0.10345               | 0.00000          | 0.72727                    | 0.16970               | 0.10303          |
|                  | 25-29     | 0.63158                    | 0.23684               | 0.13158          | 0.48905                    | 0.35766               | 0.15328          |
|                  | 30-34     | 0.59459                    | 0.35135               | 0.05405          | 0.44860                    | 0.40187               | 0.14953          |
|                  | 35-39     | 0.58974                    | 0.28205               | 0.12821          | 0.42718                    | 0.42718               | 0.14563          |
|                  | 40-44     | 0.43478                    | 0.26087               | 0.30435          | 0.37719                    | 0.39474               | 0.22807          |
|                  | 45-49     | 0.45000                    | 0.45000               | 0.10000          | 0.41837                    | 0.40816               | 0.17347          |
|                  | 50-54     | 0.54545                    | 0.36364               | 0.09091          | 0.42353                    | 0.38824               | 0.18824          |
| 55-59            | 0.28571   | 0.42857                    | 0.28571               | 0.25000          | 0.40278                    | 0.34722               |                  |
| Department<br>66 | 0-4       | 0.85294                    | 0.11765               | 0.02941          | 0.71901                    | 0.25620               | 0.02479          |
|                  | 5-9       | 0.85294                    | 0.11765               | 0.02941          | 0.76471                    | 0.16340               | 0.07190          |
|                  | 10-14     | 0.88235                    | 0.09804               | 0.01961          | 0.76433                    | 0.19745               | 0.03822          |
|                  | 15-19     | 0.88406                    | 0.11594               | 0.00000          | 0.85385                    | 0.11538               | 0.03077          |
|                  | 20-24     | 0.77778                    | 0.13889               | 0.08333          | 0.77692                    | 0.16154               | 0.06154          |
|                  | 25-29     | 0.61404                    | 0.33333               | 0.05263          | 0.65217                    | 0.21739               | 0.13043          |
|                  | 30-34     | 0.43902                    | 0.41463               | 0.14634          | 0.51515                    | 0.28283               | 0.20202          |
|                  | 35-39     | 0.46939                    | 0.42857               | 0.10204          | 0.48515                    | 0.38614               | 0.12871          |
|                  | 40-44     | 0.44000                    | 0.34000               | 0.22000          | 0.40230                    | 0.36782               | 0.22989          |
|                  | 45-49     | 0.46000                    | 0.42000               | 0.12000          | 0.46988                    | 0.37349               | 0.15663          |
|                  | 50-54     | 0.56522                    | 0.32609               | 0.10870          | 0.36145                    | 0.31325               | 0.32530          |
| 55-59            | 0.55556   | 0.25926                    | 0.18519               | 0.28788          | 0.48485                    | 0.22727               |                  |
| Department<br>73 | 0-4       | 0.70769                    | 0.20000               | 0.09231          | 0.77600                    | 0.18400               | 0.04000          |
|                  | 5-9       | 0.82609                    | 0.17391               | 0.00000          | 0.77273                    | 0.14545               | 0.08182          |
|                  | 10-14     | 0.88889                    | 0.11111               | 0.00000          | 0.79630                    | 0.14815               | 0.05556          |
|                  | 15-19     | 0.80769                    | 0.19231               | 0.00000          | 0.82051                    | 0.15385               | 0.02564          |
|                  | 20-24     | 0.68966                    | 0.20690               | 0.10345          | 0.70000                    | 0.24286               | 0.05714          |
|                  | 25-29     | 0.70370                    | 0.25926               | 0.03704          | 0.58824                    | 0.25490               | 0.15686          |
|                  | 30-34     | 0.53333                    | 0.43333               | 0.03333          | 0.43103                    | 0.44828               | 0.12069          |
|                  | 35-39     | 0.42105                    | 0.42105               | 0.15789          | 0.30769                    | 0.46154               | 0.23077          |
|                  | 40-44     | 0.52941                    | 0.17647               | 0.29412          | 0.37288                    | 0.42373               | 0.20339          |
|                  | 45-49     | 0.29412                    | 0.58824               | 0.11765          | 0.18966                    | 0.55172               | 0.25862          |
|                  | 50-54     | 0.26667                    | 0.53333               | 0.20000          | 0.39286                    | 0.46429               | 0.14286          |
| 55-59            | 0.45455   | 0.27273                    | 0.27273               | 0.35000          | 0.30000                    | 0.35000               |                  |

**Table 80. Prevalent rates of higher socioeconomic status population by age group, and body mass index category (Central region)**

| Departments      | Age group | Not- overweight<br>in 2005 | Overweight<br>in 2005 | Obese in<br>2005 | Not- overweight<br>in 2010 | Overweight<br>in 2010 | Obese in<br>2010 |
|------------------|-----------|----------------------------|-----------------------|------------------|----------------------------|-----------------------|------------------|
| Department<br>5  | 0-4       | 0.85294                    | 0.11765               | 0.02941          | 0.74101                    | 0.20863               | 0.05036          |
|                  | 5-9       | 0.85294                    | 0.11765               | 0.02941          | 0.68696                    | 0.20870               | 0.10435          |
|                  | 10-14     | 0.88235                    | 0.09804               | 0.01961          | 0.74747                    | 0.18434               | 0.06818          |
|                  | 15-19     | 0.88406                    | 0.11594               | 0.00000          | 0.82075                    | 0.13208               | 0.04717          |
|                  | 20-24     | 0.77778                    | 0.13889               | 0.08333          | 0.71802                    | 0.21149               | 0.07050          |
|                  | 25-29     | 0.61404                    | 0.33333               | 0.05263          | 0.57751                    | 0.33739               | 0.08511          |
|                  | 30-34     | 0.43902                    | 0.41463               | 0.14634          | 0.49505                    | 0.36634               | 0.13861          |
|                  | 35-39     | 0.46939                    | 0.42857               | 0.10204          | 0.36101                    | 0.47292               | 0.16606          |
|                  | 40-44     | 0.44000                    | 0.34000               | 0.22000          | 0.38438                    | 0.46875               | 0.14688          |
|                  | 45-49     | 0.46000                    | 0.42000               | 0.12000          | 0.38462                    | 0.43787               | 0.17751          |
|                  | 50-54     | 0.56522                    | 0.32609               | 0.10870          | 0.28435                    | 0.46326               | 0.25240          |
| 55-59            | 0.55556   | 0.25926                    | 0.18519               | 0.32877          | 0.40639                    | 0.26484               |                  |
| Department<br>17 | 0-4       | 0.76364                    | 0.05455               | 0.18182          | 0.78788                    | 0.18182               | 0.03030          |
|                  | 5-9       | 0.88889                    | 0.08333               | 0.02778          | 0.65068                    | 0.20548               | 0.14384          |
|                  | 10-14     | 0.82609                    | 0.15217               | 0.02174          | 0.74194                    | 0.22043               | 0.03763          |
|                  | 15-19     | 0.88060                    | 0.07463               | 0.04478          | 0.86364                    | 0.11111               | 0.02525          |
|                  | 20-24     | 0.77320                    | 0.16495               | 0.06186          | 0.73780                    | 0.24390               | 0.01829          |
|                  | 25-29     | 0.71667                    | 0.16667               | 0.11667          | 0.57937                    | 0.34127               | 0.07937          |
|                  | 30-34     | 0.61765                    | 0.27941               | 0.10294          | 0.43137                    | 0.38235               | 0.18627          |
|                  | 35-39     | 0.53012                    | 0.30120               | 0.16867          | 0.39695                    | 0.47328               | 0.12977          |
|                  | 40-44     | 0.43158                    | 0.46316               | 0.10526          | 0.44828                    | 0.33103               | 0.22069          |
|                  | 45-49     | 0.39048                    | 0.36190               | 0.24762          | 0.36691                    | 0.43885               | 0.19424          |
|                  | 50-54     | 0.29851                    | 0.56716               | 0.13433          | 0.32283                    | 0.44094               | 0.23622          |
| 55-59            | 0.31884   | 0.37681                    | 0.30435               | 0.34653          | 0.43564                    | 0.21782               |                  |
| Department<br>18 | 0-4       | 0.77778                    | 0.20000               | 0.02222          | 0.76471                    | 0.17647               | 0.05882          |
|                  | 5-9       | 0.77273                    | 0.18182               | 0.04545          | 0.73077                    | 0.07692               | 0.19231          |
|                  | 10-14     | 0.84000                    | 0.12000               | 0.04000          | 0.66667                    | 0.28571               | 0.04762          |
|                  | 15-19     | 0.74074                    | 0.22222               | 0.03704          | 0.82143                    | 0.10714               | 0.07143          |
|                  | 20-24     | 0.88000                    | 0.06000               | 0.06000          | 0.34783                    | 0.56522               | 0.08696          |
|                  | 25-29     | 0.70000                    | 0.23333               | 0.06667          | 0.54167                    | 0.33333               | 0.12500          |
|                  | 30-34     | 0.53125                    | 0.34375               | 0.12500          | 0.33333                    | 0.38889               | 0.27778          |
|                  | 35-39     | 0.20000                    | 0.48000               | 0.32000          | 0.23077                    | 0.53846               | 0.23077          |
|                  | 40-44     | 0.33333                    | 0.50000               | 0.16667          | 0.11111                    | 0.50000               | 0.38889          |
|                  | 45-49     | 0.53846                    | 0.30769               | 0.15385          | 0.20000                    | 0.20000               | 0.60000          |
|                  | 50-54     | 0.35000                    | 0.40000               | 0.25000          | 0.22222                    | 0.33333               | 0.44444          |
| 55-59            | 0.50000   | 0.35714                    | 0.14286               | 0.14286          | 0.21429                    | 0.64286               |                  |
| Department<br>41 | 0-4       | 0.70769                    | 0.20000               | 0.09231          | 0.81250                    | 0.15625               | 0.03125          |
|                  | 5-9       | 0.82609                    | 0.17391               | 0.00000          | 0.69369                    | 0.18018               | 0.12613          |
|                  | 10-14     | 0.88889                    | 0.11111               | 0.00000          | 0.67890                    | 0.20183               | 0.11927          |
|                  | 15-19     | 0.80769                    | 0.19231               | 0.00000          | 0.86400                    | 0.11200               | 0.02400          |
|                  | 20-24     | 0.68966                    | 0.20690               | 0.10345          | 0.70270                    | 0.20270               | 0.09459          |
|                  | 25-29     | 0.70370                    | 0.25926               | 0.03704          | 0.45000                    | 0.37500               | 0.17500          |
|                  | 30-34     | 0.53333                    | 0.43333               | 0.03333          | 0.44444                    | 0.37778               | 0.17778          |
|                  | 35-39     | 0.42105                    | 0.42105               | 0.15789          | 0.43836                    | 0.31507               | 0.24658          |
|                  | 40-44     | 0.52941                    | 0.17647               | 0.29412          | 0.26984                    | 0.38095               | 0.34921          |

| Departments   | Age group | Not- overweight in 2005 | Overweight in 2005 | Obese in 2005 | Not- overweight in 2010 | Overweight in 2010 | Obese in 2010 |
|---------------|-----------|-------------------------|--------------------|---------------|-------------------------|--------------------|---------------|
|               | 45-49     | 0.29412                 | 0.58824            | 0.11765       | 0.17143                 | 0.54286            | 0.28571       |
|               | 50-54     | 0.26667                 | 0.53333            | 0.20000       | 0.21429                 | 0.42857            | 0.35714       |
|               | 55-59     | 0.45455                 | 0.27273            | 0.27273       | 0.25000                 | 0.47727            | 0.27273       |
| Department 63 | 0-4       | 0.92405                 | 0.05063            | 0.02532       | 0.72626                 | 0.22346            | 0.05028       |
|               | 5-9       | 0.87879                 | 0.12121            | 0.00000       | 0.76442                 | 0.15385            | 0.08173       |
|               | 10-14     | 0.96552                 | 0.03448            | 0.00000       | 0.75781                 | 0.18750            | 0.05469       |
|               | 15-19     | 0.87500                 | 0.12500            | 0.00000       | 0.80351                 | 0.14737            | 0.04912       |
|               | 20-24     | 0.89655                 | 0.10345            | 0.00000       | 0.74332                 | 0.19786            | 0.05882       |
|               | 25-29     | 0.63158                 | 0.23684            | 0.13158       | 0.57436                 | 0.32308            | 0.10256       |
|               | 30-34     | 0.59459                 | 0.35135            | 0.05405       | 0.52047                 | 0.37427            | 0.10526       |
|               | 35-39     | 0.58974                 | 0.28205            | 0.12821       | 0.42384                 | 0.37086            | 0.20530       |
|               | 40-44     | 0.43478                 | 0.26087            | 0.30435       | 0.38725                 | 0.38725            | 0.22549       |
|               | 45-49     | 0.45000                 | 0.45000            | 0.10000       | 0.33333                 | 0.45699            | 0.20968       |
|               | 50-54     | 0.54545                 | 0.36364            | 0.09091       | 0.30198                 | 0.41089            | 0.28713       |
|               | 55-59     | 0.28571                 | 0.42857            | 0.28571       | 0.30220                 | 0.42857            | 0.26923       |
| Department 66 | 0-4       | 0.85294                 | 0.11765            | 0.02941       | 0.76000                 | 0.14667            | 0.09333       |
|               | 5-9       | 0.85294                 | 0.11765            | 0.02941       | 0.70769                 | 0.16923            | 0.12308       |
|               | 10-14     | 0.88235                 | 0.09804            | 0.01961       | 0.76389                 | 0.17593            | 0.06019       |
|               | 15-19     | 0.88406                 | 0.11594            | 0.00000       | 0.84519                 | 0.12552            | 0.02929       |
|               | 20-24     | 0.77778                 | 0.13889            | 0.08333       | 0.72527                 | 0.24176            | 0.03297       |
|               | 25-29     | 0.61404                 | 0.33333            | 0.05263       | 0.54658                 | 0.34161            | 0.11180       |
|               | 30-34     | 0.43902                 | 0.41463            | 0.14634       | 0.52500                 | 0.35000            | 0.12500       |
|               | 35-39     | 0.46939                 | 0.42857            | 0.10204       | 0.43750                 | 0.38889            | 0.17361       |
|               | 40-44     | 0.44000                 | 0.34000            | 0.22000       | 0.40394                 | 0.44335            | 0.15271       |
|               | 45-49     | 0.46000                 | 0.42000            | 0.12000       | 0.32203                 | 0.47458            | 0.20339       |
|               | 50-54     | 0.56522                 | 0.32609            | 0.10870       | 0.32500                 | 0.50000            | 0.17500       |
|               | 55-59     | 0.55556                 | 0.25926            | 0.18519       | 0.30935                 | 0.43885            | 0.25180       |
| Department 73 | 0-4       | 0.70769                 | 0.20000            | 0.09231       | 0.64646                 | 0.25253            | 0.10101       |
|               | 5-9       | 0.82609                 | 0.17391            | 0.00000       | 0.74603                 | 0.19841            | 0.05556       |
|               | 10-14     | 0.88889                 | 0.11111            | 0.00000       | 0.75000                 | 0.19853            | 0.05147       |
|               | 15-19     | 0.80769                 | 0.19231            | 0.00000       | 0.81967                 | 0.11475            | 0.06557       |
|               | 20-24     | 0.68966                 | 0.20690            | 0.10345       | 0.66250                 | 0.23750            | 0.10000       |
|               | 25-29     | 0.70370                 | 0.25926            | 0.03704       | 0.50588                 | 0.35294            | 0.14118       |
|               | 30-34     | 0.53333                 | 0.43333            | 0.03333       | 0.32432                 | 0.36486            | 0.31081       |
|               | 35-39     | 0.42105                 | 0.42105            | 0.15789       | 0.35849                 | 0.33962            | 0.30189       |
|               | 40-44     | 0.52941                 | 0.17647            | 0.29412       | 0.32979                 | 0.53191            | 0.13830       |
|               | 45-49     | 0.29412                 | 0.58824            | 0.11765       | 0.20000                 | 0.46316            | 0.33684       |
|               | 50-54     | 0.26667                 | 0.53333            | 0.20000       | 0.17045                 | 0.44318            | 0.38636       |
|               | 55-59     | 0.45455                 | 0.27273            | 0.27273       | 0.19718                 | 0.46479            | 0.33803       |

**Table 81. Mortality rates and population size by age group at the department level without segregate by socioeconomic status (Central region) †**

| Departments   | Age group | Mortality rates (R) (%/year) | Not-overweight population in 2005 (Number of people)1 | Overweight population in 2005 (Number of people)2 | Obese population in 2005 (Number of people)3 |
|---------------|-----------|------------------------------|-------------------------------------------------------|---------------------------------------------------|----------------------------------------------|
| Department 5  | 0-4       | 0.00274                      | 313033                                                | 41141                                             | 19676                                        |
|               | 5-9       | 0.00027                      | 330678                                                | 43461                                             | 20785                                        |
|               | 10-14     | 0.00029                      | 352571                                                | 47009                                             | 21697                                        |
|               | 15-19     | 0.00091                      | 359035                                                | 48147                                             | 6878                                         |
|               | 20-24     | 0.00172                      | 298127                                                | 62110                                             | 17200                                        |
|               | 25-29     | 0.00166                      | 237491                                                | 81966                                             | 23119                                        |
|               | 30-34     | 0.00160                      | 168734                                                | 101673                                            | 34612                                        |
|               | 35-39     | 0.00179                      | 152801                                                | 131113                                            | 43376                                        |
|               | 40-44     | 0.00203                      | 168341                                                | 111207                                            | 41830                                        |
|               | 45-49     | 0.00307                      | 118544                                                | 104800                                            | 46387                                        |
|               | 50-54     | 0.00449                      | 85783                                                 | 84899                                             | 42450                                        |
| 55-59         | 0.00687   | 65323                        | 64403                                                 | 33122                                             |                                              |
| Department 17 | 0-4       | 0.00272                      | 10355                                                 | 2190                                              | 1892                                         |
|               | 5-9       | 0.00040                      | 8204                                                  | 1026                                              | 128                                          |
|               | 10-14     | 0.00024                      | 5073                                                  | 1060                                              | 76                                           |
|               | 15-19     | 0.00143                      | 8998                                                  | 782                                               | 391                                          |
|               | 20-24     | 0.00266                      | 6387                                                  | 1249                                              | 432                                          |
|               | 25-29     | 0.00229                      | 7836                                                  | 1711                                              | 901                                          |
|               | 30-34     | 0.00277                      | 4181                                                  | 1921                                              | 621                                          |
|               | 35-39     | 0.00248                      | 3637                                                  | 2261                                              | 885                                          |
|               | 40-44     | 0.00277                      | 1027                                                  | 1264                                              | 296                                          |
|               | 45-49     | 0.00360                      | 2766                                                  | 2646                                              | 1203                                         |
|               | 50-54     | 0.00511                      | 1434                                                  | 2376                                              | 807                                          |
| 55-59         | 0.00835   | 2174                         | 2002                                                  | 1602                                              |                                              |
| Department 18 | 0-4       | 0.00441                      | 22523                                                 | 4774                                              | 612                                          |
|               | 5-9       | 0.00029                      | 22289                                                 | 3955                                              | 1079                                         |
|               | 10-14     | 0.00030                      | 22984                                                 | 2727                                              | 779                                          |
|               | 15-19     | 0.00125                      | 20161                                                 | 3688                                              | 983                                          |
|               | 20-24     | 0.00239                      | 16251                                                 | 2730                                              | 1950                                         |
|               | 25-29     | 0.00378                      | 12118                                                 | 4088                                              | 2044                                         |
|               | 30-34     | 0.00310                      | 7959                                                  | 4776                                              | 3051                                         |
|               | 35-39     | 0.00213                      | 5832                                                  | 5285                                              | 4374                                         |
|               | 40-44     | 0.00341                      | 5454                                                  | 4813                                              | 3208                                         |
|               | 45-49     | 0.00291                      | 3321                                                  | 3875                                              | 3459                                         |
|               | 50-54     | 0.00529                      | 1926                                                  | 3740                                              | 2833                                         |
| 55-59         | 0.00910   | 2170                         | 2170                                                  | 2034                                              |                                              |
| Department 41 | 0-4       | 0.00354                      | 18555                                                 | 2274                                              | 455                                          |
|               | 5-9       | 0.00027                      | 15103                                                 | 2568                                              | 604                                          |
|               | 10-14     | 0.00039                      | 12900                                                 | 1947                                              | 487                                          |
|               | 15-19     | 0.00111                      | 10406                                                 | 1076                                              | 215                                          |
|               | 20-24     | 0.00165                      | 6043                                                  | 1171                                              | 378                                          |
|               | 25-29     | 0.00183                      | 7270                                                  | 2491                                              | 1077                                         |
|               | 30-34     | 0.00200                      | 5049                                                  | 4081                                              | 1107                                         |
|               | 35-39     | 0.00232                      | 4631                                                  | 3741                                              | 1306                                         |

| Departments   | Age group | Mortality rates (R) (%/year) | Not-overweight population in 2005 (Number of people) <sup>1</sup> | Overweight population in 2005 (Number of people) <sup>2</sup> | Obese population in 2005 (Number of people) <sup>3</sup> |
|---------------|-----------|------------------------------|-------------------------------------------------------------------|---------------------------------------------------------------|----------------------------------------------------------|
|               | 40-44     | 0.00257                      | 2634                                                              | 2634                                                          | 1044                                                     |
|               | 45-49     | 0.00325                      | 1567                                                              | 2229                                                          | 906                                                      |
|               | 50-54     | 0.00462                      | 1450                                                              | 2248                                                          | 798                                                      |
|               | 55-59     | 0.00735                      | 577                                                               | 742                                                           | 350                                                      |
| Department 63 | 0-4       | 0.00254                      | 29774                                                             | 6749                                                          | 2382                                                     |
|               | 5-9       | 0.00026                      | 32091                                                             | 8306                                                          | 1888                                                     |
|               | 10-14     | 0.00020                      | 38770                                                             | 5816                                                          | 775                                                      |
|               | 15-19     | 0.00127                      | 37171                                                             | 2478                                                          | 1377                                                     |
|               | 20-24     | 0.00218                      | 29989                                                             | 5623                                                          | 1093                                                     |
|               | 25-29     | 0.00192                      | 22264                                                             | 9584                                                          | 2064                                                     |
|               | 30-34     | 0.00218                      | 18734                                                             | 10304                                                         | 2623                                                     |
|               | 35-39     | 0.00295                      | 17555                                                             | 12255                                                         | 4471                                                     |
|               | 40-44     | 0.00288                      | 17667                                                             | 9887                                                          | 6159                                                     |
|               | 45-49     | 0.00379                      | 12311                                                             | 12169                                                         | 5094                                                     |
|               | 50-54     | 0.00557                      | 9258                                                              | 10901                                                         | 4778                                                     |
|               | 55-59     | 0.00799                      | 5967                                                              | 9315                                                          | 4366                                                     |
| Department 66 | 0-4       | 0.00305                      | 43510                                                             | 10360                                                         | 3108                                                     |
|               | 5-9       | 0.00038                      | 52740                                                             | 6511                                                          | 3256                                                     |
|               | 10-14     | 0.00029                      | 54062                                                             | 9230                                                          | 3296                                                     |
|               | 15-19     | 0.00177                      | 55410                                                             | 6013                                                          | 1289                                                     |
|               | 20-24     | 0.00316                      | 46481                                                             | 9960                                                          | 3018                                                     |
|               | 25-29     | 0.00291                      | 36477                                                             | 14414                                                         | 3824                                                     |
|               | 30-34     | 0.00349                      | 25721                                                             | 15765                                                         | 6638                                                     |
|               | 35-39     | 0.00260                      | 27832                                                             | 16235                                                         | 6668                                                     |
|               | 40-44     | 0.00295                      | 19870                                                             | 22310                                                         | 7669                                                     |
|               | 45-49     | 0.00403                      | 16641                                                             | 16923                                                         | 10154                                                    |
|               | 50-54     | 0.00560                      | 12491                                                             | 12491                                                         | 11428                                                    |
|               | 55-59     | 0.00803                      | 8113                                                              | 12930                                                         | 6845                                                     |
| Department 73 | 0-4       | 0.00309                      | 56623                                                             | 20306                                                         | 7420                                                     |
|               | 5-9       | 0.00032                      | 70476                                                             | 14238                                                         | 4983                                                     |
|               | 10-14     | 0.00027                      | 71019                                                             | 14694                                                         | 7347                                                     |
|               | 15-19     | 0.00083                      | 68411                                                             | 16011                                                         | 2183                                                     |
|               | 20-24     | 0.00197                      | 47268                                                             | 15193                                                         | 5064                                                     |
|               | 25-29     | 0.00165                      | 35075                                                             | 21135                                                         | 6296                                                     |
|               | 30-34     | 0.00171                      | 28379                                                             | 23956                                                         | 6265                                                     |
|               | 35-39     | 0.00185                      | 25168                                                             | 25168                                                         | 11325                                                    |
|               | 40-44     | 0.00256                      | 21033                                                             | 28194                                                         | 12978                                                    |
|               | 45-49     | 0.00339                      | 12616                                                             | 24049                                                         | 16164                                                    |
|               | 50-54     | 0.00497                      | 11802                                                             | 19276                                                         | 12982                                                    |
|               | 55-59     | 0.00686                      | 8816                                                              | 15428                                                         | 11020                                                    |

<sup>†</sup>Values used in this table are for the urban population

<sup>1</sup> Initial value used in the stock of not-overweight population in 2005.

<sup>2</sup> Initial value used in the stock of overweight population in 2005.

<sup>3</sup> Initial value used in the stock of obese population in 2005.

**Table 82. Mortality rates and population size by age group at the department level for the lower socioeconomic status population (Central region) †**

| Departments   | Age group | Mortality rates (R) (%/year) | Not-overweight population in 2005 (Number of people) <sup>1</sup> | Overweight population in 2005 (Number of people) <sup>2</sup> | Obese population in 2005 (Number of people) <sup>3</sup> |
|---------------|-----------|------------------------------|-------------------------------------------------------------------|---------------------------------------------------------------|----------------------------------------------------------|
| Department 5  | 0-4       | 0.00274                      | 51874                                                             | 7155                                                          | 1789                                                     |
|               | 5-9       | 0.00027                      | 54798                                                             | 7558                                                          | 1890                                                     |
|               | 10-14     | 0.00029                      | 81363                                                             | 9040                                                          | 1808                                                     |
|               | 15-19     | 0.00091                      | 82005                                                             | 10755                                                         | 0                                                        |
|               | 20-24     | 0.00172                      | 53510                                                             | 9555                                                          | 5733                                                     |
|               | 25-29     | 0.00166                      | 36780                                                             | 19966                                                         | 3153                                                     |
|               | 30-34     | 0.00160                      | 19469                                                             | 18388                                                         | 6490                                                     |
|               | 35-39     | 0.00179                      | 22674                                                             | 20702                                                         | 4929                                                     |
|               | 40-44     | 0.00203                      | 22445                                                             | 17344                                                         | 11223                                                    |
|               | 45-49     | 0.00307                      | 19757                                                             | 18039                                                         | 5154                                                     |
|               | 50-54     | 0.00449                      | 22993                                                             | 13265                                                         | 4422                                                     |
|               | 55-59     | 0.00687                      | 13801                                                             | 6440                                                          | 4600                                                     |
| Department 17 | 0-4       | 0.00272                      | 9878                                                              | 4179                                                          | 380                                                      |
|               | 5-9       | 0.00040                      | 8578                                                              | 780                                                           | 0                                                        |
|               | 10-14     | 0.00024                      | 4657                                                              | 1552                                                          | 0                                                        |
|               | 15-19     | 0.00143                      | 9536                                                              | 636                                                           | 0                                                        |
|               | 20-24     | 0.00266                      | 6131                                                              | 1613                                                          | 323                                                      |
|               | 25-29     | 0.00229                      | 8776                                                              | 1254                                                          | 418                                                      |
|               | 30-34     | 0.00277                      | 4109                                                              | 1868                                                          | 747                                                      |
|               | 35-39     | 0.00248                      | 4284                                                              | 1785                                                          | 714                                                      |
|               | 40-44     | 0.00277                      | 370                                                               | 1479                                                          | 739                                                      |
|               | 45-49     | 0.00360                      | 3705                                                              | 2646                                                          | 265                                                      |
|               | 50-54     | 0.00511                      | 2131                                                              | 1776                                                          | 710                                                      |
|               | 55-59     | 0.00835                      | 2167                                                              | 2167                                                          | 1444                                                     |
| Department 18 | 0-4       | 0.00441                      | 8569                                                              | 2203                                                          | 245                                                      |
|               | 5-9       | 0.00029                      | 6112                                                              | 1438                                                          | 360                                                      |
|               | 10-14     | 0.00030                      | 8181                                                              | 1169                                                          | 390                                                      |
|               | 15-19     | 0.00125                      | 4917                                                              | 1475                                                          | 246                                                      |
|               | 20-24     | 0.00239                      | 5720                                                              | 390                                                           | 390                                                      |
|               | 25-29     | 0.00378                      | 3066                                                              | 1022                                                          | 292                                                      |
|               | 30-34     | 0.00310                      | 2255                                                              | 1459                                                          | 531                                                      |
|               | 35-39     | 0.00213                      | 911                                                               | 2187                                                          | 1458                                                     |
|               | 40-44     | 0.00341                      | 963                                                               | 1444                                                          | 481                                                      |
|               | 45-49     | 0.00291                      | 969                                                               | 554                                                           | 277                                                      |
|               | 50-54     | 0.00529                      | 793                                                               | 907                                                           | 567                                                      |
|               | 55-59     | 0.00910                      | 949                                                               | 678                                                           | 271                                                      |
| Department 41 | 0-4       | 0.00354                      | 13426                                                             | 3794                                                          | 1751                                                     |
|               | 5-9       | 0.00027                      | 10104                                                             | 2127                                                          | 0                                                        |
|               | 10-14     | 0.00039                      | 9351                                                              | 1169                                                          | 0                                                        |
|               | 15-19     | 0.00111                      | 10515                                                             | 2504                                                          | 0                                                        |



| Departments   | Age group | Mortality rates (R) (%/year) | Not-overweight population in 2005 (Number of people)1 | Overweight population in 2005 (Number of people)2 | Obese population in 2005 (Number of people)3 |
|---------------|-----------|------------------------------|-------------------------------------------------------|---------------------------------------------------|----------------------------------------------|
|               | 20-24     | 0.00165                      | 6577                                                  | 1973                                              | 987                                          |
|               | 25-29     | 0.00183                      | 6277                                                  | 2312                                              | 330                                          |
|               | 30-34     | 0.00200                      | 4120                                                  | 3348                                              | 258                                          |
|               | 35-39     | 0.00232                      | 2201                                                  | 2201                                              | 826                                          |
|               | 40-44     | 0.00257                      | 2470                                                  | 823                                               | 1372                                         |
|               | 45-49     | 0.00325                      | 1184                                                  | 2369                                              | 474                                          |
|               | 50-54     | 0.00462                      | 905                                                   | 1810                                              | 679                                          |
|               | 55-59     | 0.00735                      | 1207                                                  | 724                                               | 724                                          |
| Department 63 | 0-4       | 0.00254                      | 12137                                                 | 665                                               | 333                                          |
|               | 5-9       | 0.00026                      | 10134                                                 | 1398                                              | 0                                            |
|               | 10-14     | 0.00020                      | 10080                                                 | 360                                               | 0                                            |
|               | 15-19     | 0.00127                      | 7047                                                  | 1007                                              | 0                                            |
|               | 20-24     | 0.00218                      | 4748                                                  | 548                                               | 0                                            |
|               | 25-29     | 0.00192                      | 5055                                                  | 1896                                              | 1053                                         |
|               | 30-34     | 0.00218                      | 4706                                                  | 2781                                              | 428                                          |
|               | 35-39     | 0.00295                      | 4837                                                  | 2313                                              | 1052                                         |
|               | 40-44     | 0.00288                      | 2425                                                  | 1455                                              | 1698                                         |
|               | 45-49     | 0.00379                      | 1972                                                  | 1972                                              | 438                                          |
| Department 66 | 0-4       | 0.00305                      | 17775                                                 | 974                                               | 487                                          |
|               | 5-9       | 0.00038                      | 14981                                                 | 2066                                              | 0                                            |
|               | 10-14     | 0.00029                      | 14797                                                 | 528                                               | 0                                            |
|               | 15-19     | 0.00177                      | 10773                                                 | 1539                                              | 0                                            |
|               | 20-24     | 0.00316                      | 7691                                                  | 887                                               | 0                                            |
|               | 25-29     | 0.00291                      | 8156                                                  | 3059                                              | 1699                                         |
|               | 30-34     | 0.00349                      | 7154                                                  | 4227                                              | 650                                          |
|               | 35-39     | 0.00260                      | 7159                                                  | 3424                                              | 1556                                         |
|               | 40-44     | 0.00295                      | 3586                                                  | 2152                                              | 2510                                         |
|               | 45-49     | 0.00403                      | 2915                                                  | 2915                                              | 648                                          |
| Department 73 | 0-4       | 0.00560                      | 3524                                                  | 2349                                              | 587                                          |
|               | 5-9       | 0.00803                      | 689                                                   | 1033                                              | 689                                          |
|               | 10-14     | 0.00309                      | 17963                                                 | 5077                                              | 2343                                         |
|               | 15-19     | 0.00032                      | 13526                                                 | 2848                                              | 0                                            |
|               | 20-24     | 0.00027                      | 13061                                                 | 1633                                              | 0                                            |
|               | 25-29     | 0.00083                      | 15283                                                 | 3639                                              | 0                                            |
|               | 30-34     | 0.00197                      | 8441                                                  | 2532                                              | 1266                                         |
|               | 35-39     | 0.00165                      | 8544                                                  | 3148                                              | 450                                          |
|               | 40-44     | 0.00171                      | 5897                                                  | 4791                                              | 369                                          |
|               | 45-49     | 0.00185                      | 3356                                                  | 3356                                              | 1258                                         |
|               | 40-44     | 0.00256                      | 4028                                                  | 1343                                              | 2238                                         |
|               | 45-49     | 0.00339                      | 1971                                                  | 3942                                              | 788                                          |
|               | 50-54     | 0.00497                      | 1574                                                  | 3147                                              | 1180                                         |

| Departments | Age group | Mortality rates (R) (%/year) | Not-overweight population in 2005 (Number of people) <sup>1</sup> | Overweight population in 2005 (Number of people) <sup>2</sup> | Obese population in 2005 (Number of people) <sup>3</sup> |
|-------------|-----------|------------------------------|-------------------------------------------------------------------|---------------------------------------------------------------|----------------------------------------------------------|
|             | 55-59     | 0.00686                      | 2204                                                              | 1322                                                          | 1322                                                     |

<sup>†</sup>Values used in this table are for the urban population

<sup>1</sup> Initial value used in the stock of not-overweight population in 2005 for lower SES.

<sup>2</sup> Initial value used in the stock of overweight population in 2005 for lower SES.

<sup>3</sup> Initial value used in the stock of obese population in 2005 for lower SES.

**Table 83. Mortality rates and population size by age group at the department level for the middle socioeconomic status population (Central region) <sup>†</sup>**

| Departments   | Age group | Mortality rates (R) (%/year) | Not-overweight population in 2005 (Number of people) <sup>1</sup> | Overweight population in 2005 (Number of people) <sup>2</sup> | Obese population in 2005 (Number of people) <sup>3</sup> |
|---------------|-----------|------------------------------|-------------------------------------------------------------------|---------------------------------------------------------------|----------------------------------------------------------|
| Department 5  | 0-4       | 0.00274                      | 70183                                                             | 9680                                                          | 2420                                                     |
|               | 5-9       | 0.00027                      | 74139                                                             | 10226                                                         | 2557                                                     |
|               | 10-14     | 0.00029                      | 90935                                                             | 10104                                                         | 2021                                                     |
|               | 15-19     | 0.00091                      | 79628                                                             | 10443                                                         | 0                                                        |
|               | 20-24     | 0.00172                      | 68374                                                             | 12210                                                         | 7326                                                     |
|               | 25-29     | 0.00166                      | 44523                                                             | 24169                                                         | 3816                                                     |
|               | 30-34     | 0.00160                      | 26592                                                             | 25115                                                         | 8864                                                     |
|               | 35-39     | 0.00179                      | 31928                                                             | 29152                                                         | 6941                                                     |
|               | 40-44     | 0.00203                      | 27832                                                             | 21507                                                         | 13916                                                    |
|               | 45-49     | 0.00307                      | 26870                                                             | 24533                                                         | 7010                                                     |
| Department 17 | 50-54     | 0.00449                      | 23993                                                             | 13842                                                         | 4614                                                     |
|               | 55-59     | 0.00687                      | 15334                                                             | 7156                                                          | 5111                                                     |
|               | 0-4       | 0.00272                      | 13677                                                             | 3039                                                          | 3039                                                     |
|               | 5-9       | 0.00040                      | 16377                                                             | 3119                                                          | 0                                                        |
|               | 10-14     | 0.00024                      | 17851                                                             | 3881                                                          | 0                                                        |
|               | 15-19     | 0.00143                      | 13987                                                             | 1272                                                          | 636                                                      |
|               | 20-24     | 0.00266                      | 12585                                                             | 1613                                                          | 645                                                      |
|               | 25-29     | 0.00229                      | 9612                                                              | 2507                                                          | 836                                                      |
|               | 30-34     | 0.00277                      | 7844                                                              | 3735                                                          | 747                                                      |
|               | 35-39     | 0.00248                      | 6426                                                              | 5712                                                          | 714                                                      |
| Department 18 | 40-44     | 0.00277                      | 3697                                                              | 5916                                                          | 1109                                                     |
|               | 45-49     | 0.00360                      | 3705                                                              | 4763                                                          | 794                                                      |
|               | 50-54     | 0.00511                      | 2131                                                              | 3552                                                          | 2486                                                     |
|               | 55-59     | 0.00835                      | 1376                                                              | 1376                                                          | 275                                                      |
|               | 0-4       | 0.00441                      | 7521                                                              | 1934                                                          | 215                                                      |
|               | 5-9       | 0.00029                      | 5834                                                              | 1373                                                          | 343                                                      |
|               | 10-14     | 0.00030                      | 8835                                                              | 1262                                                          | 421                                                      |
| Department 18 | 15-19     | 0.00125                      | 8014                                                              | 2404                                                          | 401                                                      |
|               | 20-24     | 0.00239                      | 6178                                                              | 421                                                           | 421                                                      |
|               | 25-29     | 0.00378                      | 4803                                                              | 1601                                                          | 457                                                      |
|               | 30-34     | 0.00310                      | 2537                                                              | 1642                                                          | 597                                                      |

| Departments   | Age group     | Mortality rates (R) (%/year) | Not-overweight population in 2005 (Number of people)1 | Overweight population in 2005 (Number of people)2 | Obese population in 2005 (Number of people)3 |
|---------------|---------------|------------------------------|-------------------------------------------------------|---------------------------------------------------|----------------------------------------------|
|               | 35-39         | 0.00213                      | 948                                                   | 2274                                              | 1516                                         |
|               | 40-44         | 0.00341                      | 1658                                                  | 2486                                              | 829                                          |
|               | 45-49         | 0.00291                      | 2757                                                  | 1575                                              | 788                                          |
|               | 50-54         | 0.00529                      | 833                                                   | 952                                               | 595                                          |
|               | 55-59         | 0.00910                      | 1424                                                  | 1017                                              | 407                                          |
| Department 41 | 0-4           | 0.00354                      | 17557                                                 | 4962                                              | 2290                                         |
|               | 5-9           | 0.00027                      | 25481                                                 | 5364                                              | 0                                            |
|               | 10-14         | 0.00039                      | 24935                                                 | 3117                                              | 0                                            |
|               | 15-19         | 0.00111                      | 14559                                                 | 3467                                              | 0                                            |
|               | 20-24         | 0.00165                      | 13608                                                 | 4082                                              | 2041                                         |
|               | 25-29         | 0.00183                      | 13948                                                 | 5139                                              | 734                                          |
|               | 30-34         | 0.00200                      | 8378                                                  | 6807                                              | 524                                          |
|               | 35-39         | 0.00232                      | 6025                                                  | 6025                                              | 2259                                         |
|               | 40-44         | 0.00257                      | 8136                                                  | 2712                                              | 4520                                         |
|               | 45-49         | 0.00325                      | 3274                                                  | 6548                                              | 1310                                         |
|               | 50-54         | 0.00462                      | 2474                                                  | 4948                                              | 1855                                         |
|               | 55-59         | 0.00735                      | 2853                                                  | 1712                                              | 1712                                         |
|               | Department 63 | 0-4                          | 0.00254                                               | 11522                                             | 631                                          |
| 5-9           |               | 0.00026                      | 11977                                                 | 1652                                              | 0                                            |
| 10-14         |               | 0.00020                      | 17727                                                 | 633                                               | 0                                            |
| 15-19         |               | 0.00127                      | 15196                                                 | 2171                                              | 0                                            |
| 20-24         |               | 0.00218                      | 12115                                                 | 1398                                              | 0                                            |
| 25-29         |               | 0.00192                      | 6918                                                  | 2594                                              | 1441                                         |
| 30-34         |               | 0.00218                      | 6105                                                  | 3608                                              | 555                                          |
| 35-39         |               | 0.00295                      | 7566                                                  | 3618                                              | 1645                                         |
| 40-44         |               | 0.00288                      | 4324                                                  | 2594                                              | 3027                                         |
| 45-49         |               | 0.00379                      | 4239                                                  | 4239                                              | 942                                          |
| 50-54         |               | 0.00557                      | 3291                                                  | 2194                                              | 548                                          |
| 55-59         |               | 0.00799                      | 1594                                                  | 2391                                              | 1594                                         |
| Department 66 |               | 0-4                          | 0.00305                                               | 15577                                             | 2148                                         |
|               | 5-9           | 0.00038                      | 17184                                                 | 2370                                              | 593                                          |
|               | 10-14         | 0.00029                      | 23781                                                 | 2642                                              | 528                                          |
|               | 15-19         | 0.00177                      | 23469                                                 | 3078                                              | 0                                            |
|               | 20-24         | 0.00316                      | 17026                                                 | 3040                                              | 1824                                         |
|               | 25-29         | 0.00291                      | 10851                                                 | 5891                                              | 930                                          |
|               | 30-34         | 0.00349                      | 6852                                                  | 6472                                              | 2284                                         |
|               | 35-39         | 0.00260                      | 8912                                                  | 8137                                              | 1937                                         |
|               | 40-44         | 0.00295                      | 6470                                                  | 4999                                              | 3235                                         |
|               | 45-49         | 0.00403                      | 6406                                                  | 5849                                              | 1671                                         |
|               | 50-54         | 0.00560                      | 4979                                                  | 2873                                              | 958                                          |
|               | 55-59         | 0.00803                      | 4399                                                  | 2053                                              | 1466                                         |
|               | Department 73 | 0-4                          | 0.00309                                               | 23490                                             | 6639                                         |
| 5-9           |               | 0.00032                      | 34108                                                 | 7181                                              | 0                                            |
| 10-14         |               | 0.00027                      | 34829                                                 | 4354                                              | 0                                            |

| Departments | Age group | Mortality rates (R) (%/year) | Not-overweight population in 2005 (Number of people) <sup>1</sup> | Overweight population in 2005 (Number of people) <sup>2</sup> | Obese population in 2005 (Number of people) <sup>3</sup> |
|-------------|-----------|------------------------------|-------------------------------------------------------------------|---------------------------------------------------------------|----------------------------------------------------------|
|             | 15-19     | 0.00083                      | 21162                                                             | 5038                                                          | 0                                                        |
|             | 20-24     | 0.00197                      | 17463                                                             | 5239                                                          | 2620                                                     |
|             | 25-29     | 0.00165                      | 18987                                                             | 6995                                                          | 999                                                      |
|             | 30-34     | 0.00171                      | 11990                                                             | 9742                                                          | 749                                                      |
|             | 35-39     | 0.00185                      | 9184                                                              | 9184                                                          | 3444                                                     |
|             | 40-44     | 0.00256                      | 13268                                                             | 4423                                                          | 7371                                                     |
|             | 45-49     | 0.00339                      | 5450                                                              | 10900                                                         | 2180                                                     |
|             | 50-54     | 0.00497                      | 4301                                                              | 8602                                                          | 3226                                                     |
|             | 55-59     | 0.00686                      | 5209                                                              | 3126                                                          | 3126                                                     |

†Values used in this table are for the urban population

<sup>1</sup> Initial value used in the stock of not-overweight population in 2005 for middle SES.

<sup>2</sup> Initial value used in the stock of overweight population in 2005 for middle SES.

<sup>3</sup> Initial value used in the stock of obese population in 2005 for middle SES.

**Table 84. Mortality rates and population size by age group at the department level for the higher socioeconomic status population (Central region) †**

| Departments   | Age group | Mortality rates (R) (%/year) | Not-overweight population in 2005 (Number of people) <sup>1</sup> | Overweight population in 2005 (Number of people) <sup>2</sup> | Obese population in 2005 (Number of people) <sup>3</sup> |
|---------------|-----------|------------------------------|-------------------------------------------------------------------|---------------------------------------------------------------|----------------------------------------------------------|
| Department 5  | 0-4       | 0.00274                      | 196816                                                            | 27147                                                         | 6787                                                     |
|               | 5-9       | 0.00027                      | 207910                                                            | 28677                                                         | 7169                                                     |
|               | 10-14     | 0.00029                      | 199418                                                            | 22158                                                         | 4432                                                     |
|               | 15-19     | 0.00091                      | 204419                                                            | 26809                                                         | 0                                                        |
|               | 20-24     | 0.00172                      | 171678                                                            | 30657                                                         | 18394                                                    |
|               | 25-29     | 0.00166                      | 129051                                                            | 70056                                                         | 11062                                                    |
|               | 30-34     | 0.00160                      | 87850                                                             | 82969                                                         | 29283                                                    |
|               | 35-39     | 0.00179                      | 99024                                                             | 90413                                                         | 21527                                                    |
|               | 40-44     | 0.00203                      | 91129                                                             | 70417                                                         | 45564                                                    |
|               | 45-49     | 0.00307                      | 77449                                                             | 70714                                                         | 20204                                                    |
| Department 17 | 0-4       | 0.00272                      | 15957                                                             | 1140                                                          | 3799                                                     |
|               | 5-9       | 0.00040                      | 24955                                                             | 2340                                                          | 780                                                      |
|               | 10-14     | 0.00024                      | 29493                                                             | 5433                                                          | 776                                                      |
|               | 15-19     | 0.00143                      | 37510                                                             | 3179                                                          | 1907                                                     |
|               | 20-24     | 0.00266                      | 24202                                                             | 5163                                                          | 1936                                                     |
|               | 25-29     | 0.00229                      | 17970                                                             | 4179                                                          | 2925                                                     |
|               | 30-34     | 0.00277                      | 15688                                                             | 7097                                                          | 2615                                                     |
|               | 35-39     | 0.00248                      | 15708                                                             | 8925                                                          | 4998                                                     |
|               | 40-44     | 0.00277                      | 15160                                                             | 16269                                                         | 3697                                                     |
|               | 45-49     | 0.00360                      | 10849                                                             | 10055                                                         | 6880                                                     |
|               | 50-54     | 0.00511                      | 7103                                                              | 13497                                                         | 3197                                                     |
|               | 55-59     | 0.00835                      | 6053                                                              | 7153                                                          | 5778                                                     |

| Departments   | Age group | Mortality rates (R) (%/year) | Not-overweight population in 2005 (Number of people)1 | Overweight population in 2005 (Number of people)2 | Obese population in 2005 (Number of people)3 |
|---------------|-----------|------------------------------|-------------------------------------------------------|---------------------------------------------------|----------------------------------------------|
| Department 18 | 0-4       | 0.00441                      | 5617                                                  | 1444                                              | 160                                          |
|               | 5-9       | 0.00029                      | 9167                                                  | 2157                                              | 539                                          |
|               | 10-14     | 0.00030                      | 5236                                                  | 748                                               | 249                                          |
|               | 15-19     | 0.00125                      | 5464                                                  | 1639                                              | 273                                          |
|               | 20-24     | 0.00239                      | 6521                                                  | 445                                               | 445                                          |
|               | 25-29     | 0.00378                      | 4906                                                  | 1635                                              | 467                                          |
|               | 30-34     | 0.00310                      | 3594                                                  | 2326                                              | 846                                          |
|               | 35-39     | 0.00213                      | 1239                                                  | 2974                                              | 1983                                         |
|               | 40-44     | 0.00341                      | 1872                                                  | 2807                                              | 936                                          |
|               | 45-49     | 0.00291                      | 2012                                                  | 1150                                              | 575                                          |
|               | 50-54     | 0.00529                      | 1349                                                  | 1541                                              | 963                                          |
| 55-59         | 0.00910   | 814                          | 581                                                   | 232                                               |                                              |
| Department 41 | 0-4       | 0.00354                      | 13633                                                 | 3853                                              | 1778                                         |
|               | 5-9       | 0.00027                      | 19769                                                 | 4162                                              | 0                                            |
|               | 10-14     | 0.00039                      | 24935                                                 | 3117                                              | 0                                            |
|               | 15-19     | 0.00111                      | 23053                                                 | 5489                                              | 0                                            |
|               | 20-24     | 0.00165                      | 16103                                                 | 4831                                              | 2415                                         |
|               | 25-29     | 0.00183                      | 12088                                                 | 4454                                              | 636                                          |
|               | 30-34     | 0.00200                      | 9340                                                  | 7589                                              | 584                                          |
|               | 35-39     | 0.00232                      | 8805                                                  | 8805                                              | 3302                                         |
|               | 40-44     | 0.00257                      | 9588                                                  | 3196                                              | 5327                                         |
|               | 45-49     | 0.00325                      | 4876                                                  | 9753                                              | 1951                                         |
|               | 50-54     | 0.00462                      | 3379                                                  | 6758                                              | 2534                                         |
| 55-59         | 0.00735   | 4718                         | 2831                                                  | 2831                                              |                                              |
| Department 63 | 0-4       | 0.00254                      | 12291                                                 | 673                                               | 337                                          |
|               | 5-9       | 0.00026                      | 15048                                                 | 2076                                              | 0                                            |
|               | 10-14     | 0.00020                      | 15989                                                 | 571                                               | 0                                            |
|               | 15-19     | 0.00127                      | 13654                                                 | 1951                                              | 0                                            |
|               | 20-24     | 0.00218                      | 16045                                                 | 1851                                              | 0                                            |
|               | 25-29     | 0.00192                      | 9445                                                  | 3542                                              | 1968                                         |
|               | 30-34     | 0.00218                      | 8013                                                  | 4735                                              | 728                                          |
|               | 35-39     | 0.00295                      | 7814                                                  | 3737                                              | 1699                                         |
|               | 40-44     | 0.00288                      | 7909                                                  | 4745                                              | 5536                                         |
|               | 45-49     | 0.00379                      | 7098                                                  | 7098                                              | 1577                                         |
|               | 50-54     | 0.00557                      | 7898                                                  | 5265                                              | 1316                                         |
| 55-59         | 0.00799   | 3535                         | 5302                                                  | 3535                                              |                                              |
| Department 66 | 0-4       | 0.00305                      | 16615                                                 | 2292                                              | 573                                          |
|               | 5-9       | 0.00038                      | 21590                                                 | 2978                                              | 744                                          |
|               | 10-14     | 0.00029                      | 21450                                                 | 2383                                              | 477                                          |
|               | 15-19     | 0.00177                      | 21088                                                 | 2766                                              | 0                                            |
|               | 20-24     | 0.00316                      | 22548                                                 | 4026                                              | 2416                                         |
|               | 25-29     | 0.00291                      | 14816                                                 | 8043                                              | 1270                                         |
|               | 30-34     | 0.00349                      | 8994                                                  | 8494                                              | 2998                                         |
| 35-39         | 0.00260   | 9204                         | 8404                                                  | 2001                                              |                                              |

| Departments   | Age group | Mortality rates (R) (%/year) | Not-overweight population in 2005 (Number of people) <sup>1</sup> | Overweight population in 2005 (Number of people) <sup>2</sup> | Obese population in 2005 (Number of people) <sup>3</sup> |
|---------------|-----------|------------------------------|-------------------------------------------------------------------|---------------------------------------------------------------|----------------------------------------------------------|
|               | 40-44     | 0.00295                      | 11835                                                             | 9145                                                          | 5917                                                     |
|               | 45-49     | 0.00403                      | 10726                                                             | 9793                                                          | 2798                                                     |
|               | 50-54     | 0.00560                      | 11950                                                             | 6894                                                          | 2298                                                     |
|               | 55-59     | 0.00803                      | 9755                                                              | 4553                                                          | 3252                                                     |
| Department 73 | 0-4       | 0.00309                      | 18239                                                             | 5155                                                          | 2379                                                     |
|               | 5-9       | 0.00032                      | 26463                                                             | 5571                                                          | 0                                                        |
|               | 10-14     | 0.00027                      | 34829                                                             | 4354                                                          | 0                                                        |
|               | 15-19     | 0.00083                      | 33506                                                             | 7978                                                          | 0                                                        |
|               | 20-24     | 0.00197                      | 20665                                                             | 6199                                                          | 3100                                                     |
|               | 25-29     | 0.00165                      | 16455                                                             | 6062                                                          | 866                                                      |
|               | 30-34     | 0.00171                      | 13366                                                             | 10860                                                         | 835                                                      |
|               | 35-39     | 0.00185                      | 13423                                                             | 13423                                                         | 5034                                                     |
|               | 40-44     | 0.00256                      | 15637                                                             | 5212                                                          | 8687                                                     |
|               | 45-49     | 0.00339                      | 8117                                                              | 16233                                                         | 3247                                                     |
| 50-54         | 0.00497   | 5875                         | 11749                                                             | 4406                                                          |                                                          |
| 55-59         | 0.00686   | 8616                         | 5169                                                              | 5169                                                          |                                                          |

†Values used in this table are for the urban population

<sup>1</sup> Initial value used in the stock of not-overweight population in 2005 for higher SES.

<sup>2</sup> Initial value used in the stock of overweight population in 2005 for higher SES.

<sup>3</sup> Initial value used in the stock of obese population in 2005 for higher SES.

## 1.4 Pacifica Region

The Pacifica region of Colombia is located in the eastern part of the national territory and consists of four departments, these are:

- Cauca (19)
- Chocó (27)
- Nariño (52)
- Valle Del Cauca (76)

### 1.4.1 Data and model parameters used

**Table 85. Prevalent rates of entire population by age group, gender, and body mass index category in 2005 (Pacifica region)**

| Age Group | Nutritional State Male |           |         | Nutritional State Female |           |         |
|-----------|------------------------|-----------|---------|--------------------------|-----------|---------|
|           | Not-Overweigh          | Overweigh | Obese   | Not-Overweigh            | Overweigh | Obese   |
| 0-4       | 0.78558                | 0.15595   | 0.05848 | 0.75569                  | 0.19048   | 0.05383 |
| 5-9       | 0.81818                | 0.13439   | 0.04743 | 0.80658                  | 0.13169   | 0.06173 |
| 10-14     | 0.83539                | 0.12757   | 0.03704 | 0.82474                  | 0.12027   | 0.05498 |
| 15-19     | 0.89286                | 0.08631   | 0.02083 | 0.78109                  | 0.19154   | 0.02736 |
| 20-24     | 0.79104                | 0.16667   | 0.04229 | 0.76214                  | 0.19741   | 0.04045 |
| 25-29     | 0.62500                | 0.28889   | 0.08611 | 0.59848                  | 0.28598   | 0.11553 |
| 30-34     | 0.53618                | 0.34539   | 0.11842 | 0.49791                  | 0.33682   | 0.16527 |

|       |         |         |         |         |         |         |
|-------|---------|---------|---------|---------|---------|---------|
| 35-39 | 0.48454 | 0.38144 | 0.13402 | 0.42443 | 0.39130 | 0.18427 |
| 40-44 | 0.41852 | 0.43333 | 0.14815 | 0.33781 | 0.41611 | 0.24609 |
| 45-49 | 0.37500 | 0.47321 | 0.15179 | 0.25373 | 0.41791 | 0.32836 |
| 50-54 | 0.44206 | 0.42489 | 0.13305 | 0.27072 | 0.39227 | 0.33702 |
| 55-59 | 0.38194 | 0.47222 | 0.14583 | 0.23551 | 0.36957 | 0.39493 |

**Table 86. Prevalent rates of lower socioeconomic status population by age group, gender, and body mass index category in 2005 (Pacifica region)**

| Age Group | Nutritional State -Male |           |         | Nutritional State -Female |           |         |
|-----------|-------------------------|-----------|---------|---------------------------|-----------|---------|
|           | Not-Overweigh           | Overweigh | Obese   | Not-Overweigh             | Overweigh | Obese   |
| 0-4       | 0.80588                 | 0.13529   | 0.05882 | 0.80952                   | 0.13690   | 0.05357 |
| 5-9       | 0.87324                 | 0.11268   | 0.01408 | 0.90476                   | 0.06349   | 0.03175 |
| 10-14     | 0.91398                 | 0.06452   | 0.02151 | 0.87013                   | 0.12987   | 0.00000 |
| 15-19     | 1.00000                 | 0.00000   | 0.00000 | 0.74528                   | 0.21698   | 0.03774 |
| 20-24     | 0.86325                 | 0.11111   | 0.02564 | 0.73759                   | 0.20567   | 0.05674 |
| 25-29     | 0.76923                 | 0.15385   | 0.07692 | 0.53906                   | 0.31250   | 0.14844 |
| 30-34     | 0.69444                 | 0.19444   | 0.11111 | 0.49091                   | 0.34545   | 0.16364 |
| 35-39     | 0.68056                 | 0.26389   | 0.05556 | 0.44915                   | 0.35593   | 0.19492 |
| 40-44     | 0.56061                 | 0.33333   | 0.10606 | 0.38043                   | 0.36957   | 0.25000 |
| 45-49     | 0.63636                 | 0.25455   | 0.10909 | 0.22500                   | 0.46250   | 0.31250 |
| 50-54     | 0.76087                 | 0.15217   | 0.08696 | 0.27941                   | 0.41176   | 0.30882 |
| 55-59     | 0.64706                 | 0.26471   | 0.08824 | 0.21739                   | 0.43478   | 0.34783 |

**Table 87. Prevalent rates of middle socioeconomic status population by age group, gender, and body mass index category in 2005 (Pacifica region)**

| Age Group | Nutritional State Male |           |         | Nutritional State Female |           |         |
|-----------|------------------------|-----------|---------|--------------------------|-----------|---------|
|           | Not-Overweigh          | Overweigh | Obese   | Not-Overweigh            | Overweigh | Obese   |
| 0-4       | 0.77273                | 0.15152   | 0.07576 | 0.73973                  | 0.22603   | 0.03425 |
| 5-9       | 0.87013                | 0.11688   | 0.01299 | 0.85915                  | 0.11268   | 0.02817 |
| 10-14     | 0.80328                | 0.14754   | 0.04918 | 0.77477                  | 0.13514   | 0.09009 |
| 15-19     | 0.90000                | 0.07778   | 0.02222 | 0.84112                  | 0.14019   | 0.01869 |
| 20-24     | 0.74528                | 0.20755   | 0.04717 | 0.74118                  | 0.21765   | 0.04118 |
| 25-29     | 0.62281                | 0.28070   | 0.09649 | 0.58710                  | 0.30968   | 0.10323 |
| 30-34     | 0.52577                | 0.38144   | 0.09278 | 0.45522                  | 0.35821   | 0.18657 |
| 35-39     | 0.52874                | 0.36782   | 0.10345 | 0.40909                  | 0.32727   | 0.26364 |
| 40-44     | 0.53125                | 0.37500   | 0.09375 | 0.28682                  | 0.39535   | 0.31783 |
| 45-49     | 0.42857                | 0.44643   | 0.12500 | 0.24444                  | 0.36667   | 0.38889 |
| 50-54     | 0.43333                | 0.46667   | 0.10000 | 0.26667                  | 0.41333   | 0.32000 |
| 55-59     | 0.22581                | 0.54839   | 0.22581 | 0.21918                  | 0.31507   | 0.46575 |

**Table 88. Prevalent rates of higher socioeconomic status population by age group, gender, and body mass index category in 2005 (Pacifica region)**

| Age Group | Nutritional State Male |           |         | Nutritional State Female |           |         |
|-----------|------------------------|-----------|---------|--------------------------|-----------|---------|
|           | Not-Overweigh          | Overweigh | Obese   | Not-Overweigh            | Overweigh | Obese   |
| 0-4       | 0.77725                | 0.17536   | 0.04739 | 0.71598                  | 0.21302   | 0.07101 |
| 5-9       | 0.74286                | 0.16190   | 0.09524 | 0.71560                  | 0.18349   | 0.10092 |
| 10-14     | 0.77528                | 0.17978   | 0.04494 | 0.84466                  | 0.09709   | 0.05825 |
| 15-19     | 0.81379                | 0.15172   | 0.03448 | 0.76720                  | 0.20635   | 0.02646 |

|       |         |         |         |         |         |         |
|-------|---------|---------|---------|---------|---------|---------|
| 20-24 | 0.77095 | 0.17877 | 0.05028 | 0.78502 | 0.18241 | 0.03257 |
| 25-29 | 0.55952 | 0.35714 | 0.08333 | 0.63673 | 0.25714 | 0.10612 |
| 30-34 | 0.45926 | 0.40000 | 0.14074 | 0.52564 | 0.32051 | 0.15385 |
| 35-39 | 0.34848 | 0.45455 | 0.19697 | 0.41961 | 0.43529 | 0.14510 |
| 40-44 | 0.30000 | 0.50714 | 0.19286 | 0.34956 | 0.44690 | 0.20354 |
| 45-49 | 0.22124 | 0.59292 | 0.18584 | 0.26724 | 0.42241 | 0.31034 |
| 50-54 | 0.33071 | 0.50394 | 0.16535 | 0.26941 | 0.37900 | 0.35160 |
| 55-59 | 0.32911 | 0.53165 | 0.13924 | 0.24841 | 0.37580 | 0.37580 |

**Table 89. Prevalent rates of entire population by age group, gender, and body mass index category in 2010 (Pacifica region)**

| Age Group | Nutritional State Male |           |         | Nutritional State Female |           |         |
|-----------|------------------------|-----------|---------|--------------------------|-----------|---------|
|           | Not-Overweigh          | Overweigh | Obese   | Not-Overweigh            | Overweigh | Obese   |
| 0-4       | 0.72851                | 0.19236   | 0.07913 | 0.75176                  | 0.19887   | 0.04937 |
| 5-9       | 0.75553                | 0.15848   | 0.08600 | 0.76800                  | 0.16667   | 0.06533 |
| 10-14     | 0.73949                | 0.17407   | 0.08645 | 0.76089                  | 0.18883   | 0.05028 |
| 15-19     | 0.82404                | 0.14746   | 0.02850 | 0.77235                  | 0.17759   | 0.05006 |
| 20-24     | 0.73607                | 0.20000   | 0.06393 | 0.69525                  | 0.22164   | 0.08311 |
| 25-29     | 0.56920                | 0.33723   | 0.09357 | 0.55601                  | 0.30055   | 0.14344 |
| 30-34     | 0.46764                | 0.40501   | 0.12735 | 0.40194                  | 0.40357   | 0.19449 |
| 35-39     | 0.40000                | 0.41772   | 0.18228 | 0.36799                  | 0.37789   | 0.25413 |
| 40-44     | 0.35648                | 0.48148   | 0.16204 | 0.34231                  | 0.41204   | 0.24564 |
| 45-49     | 0.42746                | 0.40933   | 0.16321 | 0.26847                  | 0.39099   | 0.34054 |
| 50-54     | 0.42089                | 0.41139   | 0.16772 | 0.23314                  | 0.38728   | 0.37958 |
| 55-59     | 0.39416                | 0.43796   | 0.16788 | 0.19471                  | 0.42067   | 0.38462 |

**Table 90. Prevalent rates of lower socioeconomic status population by age group, gender, and body mass index category in 2010 (Pacifica region)**

| Age Group | Nutritional State -Male |           |         | Nutritional State -Female |           |         |
|-----------|-------------------------|-----------|---------|---------------------------|-----------|---------|
|           | Not-Overweigh           | Overweigh | Obese   | Not-Overweigh             | Overweigh | Obese   |
| 0-4       | 0.73129                 | 0.22109   | 0.04762 | 0.74747                   | 0.21212   | 0.04040 |
| 5-9       | 0.84112                 | 0.12773   | 0.03115 | 0.82540                   | 0.13016   | 0.04444 |
| 10-14     | 0.79667                 | 0.15000   | 0.05333 | 0.79751                   | 0.15888   | 0.04361 |
| 15-19     | 0.86643                 | 0.11913   | 0.01444 | 0.73958                   | 0.20833   | 0.05208 |
| 20-24     | 0.79439                 | 0.15888   | 0.04673 | 0.64015                   | 0.25379   | 0.10606 |
| 25-29     | 0.61333                 | 0.33333   | 0.05333 | 0.46479                   | 0.31925   | 0.21596 |
| 30-34     | 0.45455                 | 0.40496   | 0.14050 | 0.32927                   | 0.42683   | 0.24390 |
| 35-39     | 0.47009                 | 0.33333   | 0.19658 | 0.33333                   | 0.35948   | 0.30719 |
| 40-44     | 0.48246                 | 0.42982   | 0.08772 | 0.32000                   | 0.38667   | 0.29333 |
| 45-49     | 0.55056                 | 0.30337   | 0.14607 | 0.19697                   | 0.38636   | 0.41667 |
| 50-54     | 0.53409                 | 0.35227   | 0.11364 | 0.30435                   | 0.34783   | 0.34783 |
| 55-59     | 0.47458                 | 0.40678   | 0.11864 | 0.25000                   | 0.37500   | 0.37500 |

**Table 91. Prevalent rates of middle socioeconomic status population by age group, gender, and body mass index category in 2010 (Pacifica region)**

| Age Group | Nutritional State Male | Nutritional State Female |
|-----------|------------------------|--------------------------|
|-----------|------------------------|--------------------------|



|       | Not-Overweigh | Overweigh | Obese   | Not-Overweigh | Overweigh | Obese   |
|-------|---------------|-----------|---------|---------------|-----------|---------|
| 0-4   | 0.71226       | 0.18396   | 0.10377 | 0.73711       | 0.22165   | 0.04124 |
| 5-9   | 0.75983       | 0.17467   | 0.06550 | 0.76923       | 0.14872   | 0.08205 |
| 10-14 | 0.75000       | 0.17672   | 0.07328 | 0.75099       | 0.20158   | 0.04743 |
| 15-19 | 0.82328       | 0.15948   | 0.01724 | 0.78802       | 0.17512   | 0.03687 |
| 20-24 | 0.72185       | 0.21854   | 0.05960 | 0.70918       | 0.21939   | 0.07143 |
| 25-29 | 0.52083       | 0.34028   | 0.13889 | 0.53913       | 0.33043   | 0.13043 |
| 30-34 | 0.52448       | 0.36364   | 0.11189 | 0.41361       | 0.38743   | 0.19895 |
| 35-39 | 0.37615       | 0.49541   | 0.12844 | 0.32065       | 0.39674   | 0.28261 |
| 40-44 | 0.37398       | 0.44715   | 0.17886 | 0.38217       | 0.36943   | 0.24841 |
| 45-49 | 0.40187       | 0.46729   | 0.13084 | 0.24060       | 0.40602   | 0.35338 |
| 50-54 | 0.45588       | 0.35294   | 0.19118 | 0.19708       | 0.32847   | 0.47445 |
| 55-59 | 0.45833       | 0.36111   | 0.18056 | 0.16129       | 0.43011   | 0.40860 |

**Table 92. Prevalent rates of higher socioeconomic status population by age group, gender, and body mass index category in 2010 (Pacifica region)**

| Age Group | Nutritional State Male |           |         | Nutritional State Female |           |         |
|-----------|------------------------|-----------|---------|--------------------------|-----------|---------|
|           | Not-Overweigh          | Overweigh | Obese   | Not-Overweigh            | Overweigh | Obese   |
| 0-4       | 0.65882                | 0.16300   | 0.09692 | 0.77064                  | 0.16055   | 0.06881 |
| 5-9       | 0.66537                | 0.18182   | 0.17045 | 0.69167                  | 0.22917   | 0.07917 |
| 10-14     | 0.71895                | 0.19444   | 0.12654 | 0.73209                  | 0.20872   | 0.05919 |
| 15-19     | 0.82979                | 0.16443   | 0.05034 | 0.79042                  | 0.15269   | 0.05689 |
| 20-24     | 0.75893                | 0.22449   | 0.08163 | 0.73490                  | 0.19463   | 0.07047 |
| 25-29     | 0.64103                | 0.33790   | 0.09132 | 0.63668                  | 0.26298   | 0.10035 |
| 30-34     | 0.54971                | 0.43256   | 0.13023 | 0.43893                  | 0.40076   | 0.16031 |
| 35-39     | 0.45588                | 0.42604   | 0.20710 | 0.42007                  | 0.37546   | 0.20446 |
| 40-44     | 0.37857                | 0.53333   | 0.19487 | 0.33333                  | 0.44444   | 0.22222 |
| 45-49     | 0.53676                | 0.42632   | 0.18947 | 0.31379                  | 0.38621   | 0.30000 |
| 50-54     | 0.47414                | 0.46875   | 0.18750 | 0.22097                  | 0.43446   | 0.34457 |
| 55-59     | 0.48454                | 0.48951   | 0.18182 | 0.18723                  | 0.43404   | 0.37872 |

**Table 93. Fraction of births for men by body mass index category, and socioeconomic status (Pacifica region) †**

| Population group | Lower SES (%/year) | Middle SES (%/year) | Higher SES (%/year) | Complete Urban Population (%/year) |
|------------------|--------------------|---------------------|---------------------|------------------------------------|
| Not- overweight  | 72,41%             | 85,19%              | 76,09%              | 77,45%                             |
| Overweight       | 17,24%             | 7,41%               | 19,57%              | 15,69%                             |
| Obese            | 10,34%             | 7,41%               | 4,35%               | 6,86%                              |

† The fractions of births by each BMI category correspond to the prevalences by BMI category of children aged 0 to 12 months

**Table 94. Fraction of births for women by body mass index category and socioeconomic status (Pacifica region) †**

| Population group | Lower SES (%/year) | Middle SES (%/year) | Higher SES (%/year) | Complete Urban Population (%/year) |
|------------------|--------------------|---------------------|---------------------|------------------------------------|
| Not- overweight  | 84,09%             | 75,00%              | 72,41%              | 78,10%                             |
| Overweight       | 11,36%             | 25,00%              | 27,59%              | 20,00%                             |
| Obese            | 4,55%              | 0,00%               | 0,00%               | 1,90%                              |

† The fractions of births by each BMI category correspond to the prevalences by BMI category of children aged

0 to 12 months

**Table 95. Mortality rates for men and population size by age group without segregate by socioeconomic status (Pacifica region) †**

| Age group | Mortality rates (R) (%/year) Male | Not- overweight men in 2005 (Number of people) <sup>1</sup> | Overweight men in 2005 (Number of people) <sup>2</sup> | Obese men in 2005 (Number of people) <sup>3</sup> |
|-----------|-----------------------------------|-------------------------------------------------------------|--------------------------------------------------------|---------------------------------------------------|
| 0-4       | 0.00307                           | 184596                                                      | 36644                                                  | 13742                                             |
| 5-9       | 0.00033                           | 203636                                                      | 33447                                                  | 11805                                             |
| 10-14     | 0.00038                           | 218566                                                      | 33377                                                  | 9690                                              |
| 15-19     | 0.00275                           | 226037                                                      | 21850                                                  | 5274                                              |
| 20-24     | 0.00451                           | 176846                                                      | 37260                                                  | 9454                                              |
| 25-29     | 0.00478                           | 123731                                                      | 57191                                                  | 17047                                             |
| 30-34     | 0.00447                           | 93277                                                       | 60086                                                  | 20601                                             |
| 35-39     | 0.00378                           | 84070                                                       | 66183                                                  | 23254                                             |
| 40-44     | 0.00398                           | 68393                                                       | 70814                                                  | 24210                                             |
| 45-49     | 0.00447                           | 51185                                                       | 64590                                                  | 20718                                             |
| 50-54     | 0.00621                           | 48842                                                       | 46945                                                  | 14700                                             |
| 55-59     | 0.00823                           | 32748                                                       | 40488                                                  | 12504                                             |

†Values used in this table are for the urban population

<sup>1</sup> Initial value used in the stock of not-overweight population in 2005.<sup>2</sup> Initial value used in the stock of overweight population in 2005.<sup>3</sup> Initial value used in the stock of obese population in 2005.**Table 96. Mortality rates for women and population size by age group without segregate by socioeconomic status (Pacifica region) †**

| Age group | Mortality rates (R) (%/year) | Not- overweight women in 2005 (Number of people) <sup>1</sup> | Overweight women in 2005 (Number of people) <sup>2</sup> | Obese women in 2005 (Number of people) <sup>3</sup> |
|-----------|------------------------------|---------------------------------------------------------------|----------------------------------------------------------|-----------------------------------------------------|
| 0-4       | 0,00252                      | 171187                                                        | 43149                                                    | 12194                                               |
| 5-9       | 0,00019                      | 194155                                                        | 31699                                                    | 14859                                               |
| 10-14     | 0,00028                      | 209050                                                        | 30486                                                    | 13937                                               |
| 15-19     | 0,00059                      | 198205                                                        | 48604                                                    | 6943                                                |
| 20-24     | 0,00085                      | 181109                                                        | 46912                                                    | 9613                                                |
| 25-29     | 0,00095                      | 129444                                                        | 61855                                                    | 24988                                               |
| 30-34     | 0,00101                      | 97854                                                         | 66196                                                    | 32481                                               |
| 35-39     | 0,00132                      | 86582                                                         | 79824                                                    | 37589                                               |
| 40-44     | 0,00157                      | 65676                                                         | 80899                                                    | 47844                                               |
| 45-49     | 0,00235                      | 42021                                                         | 69211                                                    | 54380                                               |
| 50-54     | 0,00354                      | 36458                                                         | 52827                                                    | 45386                                               |
| 55-59     | 0,00526                      | 24456                                                         | 38377                                                    | 41010                                               |

†Values used in this table are for the urban population

<sup>1</sup> Initial value used in the stock of not-overweight population in 2005.<sup>2</sup> Initial value used in the stock of overweight population in 2005.<sup>3</sup> Initial value used in the stock of obese population in 2005.**Table 97. Man mortality rates and population size by age group for the lower socioeconomic status population (Pacifica region) †**

| Age group | Mortality rates (R) (%/year) | Not- overweight men in 2005 (Number of people) <sup>1</sup> | Overweight men in 2005 (Number of people) <sup>2</sup> | Obese men 2005 (Number of people) <sup>3</sup> |
|-----------|------------------------------|-------------------------------------------------------------|--------------------------------------------------------|------------------------------------------------|
| 0-4       | 0.00307                      | 62753                                                       | 10535                                                  | 4581                                           |

|       |         |       |       |      |
|-------|---------|-------|-------|------|
| 5-9   | 0.00033 | 60992 | 7870  | 984  |
| 10-14 | 0.00038 | 91518 | 6460  | 2153 |
| 15-19 | 0.00275 | 76099 | 0     | 0    |
| 20-24 | 0.00451 | 56168 | 7230  | 1668 |
| 25-29 | 0.00478 | 32995 | 6599  | 3299 |
| 30-34 | 0.00447 | 28613 | 8011  | 4578 |
| 35-39 | 0.00378 | 29216 | 11329 | 2385 |
| 40-44 | 0.00398 | 22394 | 13315 | 4237 |
| 45-49 | 0.00447 | 21327 | 8531  | 3656 |
| 50-54 | 0.00621 | 16597 | 3319  | 1897 |
| 55-59 | 0.00823 | 13099 | 5359  | 1786 |

†Values used in this table are for the urban population

<sup>1</sup> Initial value used in the stock of not-overweight population in 2005 for lower SES.

<sup>2</sup> Initial value used in the stock of overweight population in 2005 for lower SES.

<sup>3</sup> Initial value used in the stock of obese population in 2005 for lower SES.

**Table 98. Women mortality rates and population size by age group for the lower socioeconomic status population (Pacifica region) †**

| Age group | Mortality rates (R) (%/year) | Not- overweight women in 2005 (Number of people) <sup>1</sup> | Overweight women in 2005 (Number of people) <sup>2</sup> | Obese women in 2005 (Number of people) <sup>3</sup> |
|-----------|------------------------------|---------------------------------------------------------------|----------------------------------------------------------|-----------------------------------------------------|
| 0-4       | 0.00252                      | 60770                                                         | 10277                                                    | 4022                                                |
| 5-9       | 0.00019                      | 61118                                                         | 4289                                                     | 2145                                                |
| 10-14     | 0.00028                      | 84410                                                         | 12598                                                    | 0                                                   |
| 15-19     | 0.00059                      | 56848                                                         | 16551                                                    | 2878                                                |
| 20-24     | 0.00085                      | 51013                                                         | 14225                                                    | 3924                                                |
| 25-29     | 0.00095                      | 25262                                                         | 14644                                                    | 6956                                                |
| 30-34     | 0.00101                      | 22850                                                         | 16080                                                    | 7617                                                |
| 35-39     | 0.00132                      | 22670                                                         | 17965                                                    | 9838                                                |
| 40-44     | 0.00157                      | 18080                                                         | 17563                                                    | 11881                                               |
| 45-49     | 0.00235                      | 9149                                                          | 18807                                                    | 12707                                               |
| 50-54     | 0.00354                      | 7429                                                          | 10948                                                    | 8211                                                |
| 55-59     | 0.00526                      | 5330                                                          | 10660                                                    | 8528                                                |

†Values used in this table are for the urban population

<sup>1</sup> Initial value used in the stock of not-overweight population in 2005 for lower SES.

<sup>2</sup> Initial value used in the stock of overweight population in 2005 for lower SES.

<sup>3</sup> Initial value used in the stock of obese population in 2005 for lower SES.

**Table 99. Man mortality rates and population size by age group for the middle socioeconomic status population (Pacifica region) †**

| Age group | Mortality rates (R) (%/year) | Not- overweight men in 2005 (Number of people) <sup>1</sup> | Overweight men in 2005 (Number of people) <sup>2</sup> | Obese men in 2005 (Number of people) <sup>3</sup> |
|-----------|------------------------------|-------------------------------------------------------------|--------------------------------------------------------|---------------------------------------------------|
| 0-4       | 0.00307                      | 46722                                                       | 9161                                                   | 4581                                              |
| 5-9       | 0.00033                      | 65911                                                       | 8854                                                   | 984                                               |
| 10-14     | 0.00038                      | 52757                                                       | 9690                                                   | 3230                                              |
| 15-19     | 0.00275                      | 61030                                                       | 5274                                                   | 1507                                              |
| 20-24     | 0.00451                      | 43933                                                       | 12235                                                  | 2781                                              |
| 25-29     | 0.00478                      | 39044                                                       | 17597                                                  | 6049                                              |
| 30-34     | 0.00447                      | 29185                                                       | 21173                                                  | 5150                                              |
| 35-39     | 0.00378                      | 27427                                                       | 19080                                                  | 5366                                              |
| 40-44     | 0.00398                      | 20578                                                       | 14526                                                  | 3631                                              |
| 45-49     | 0.00447                      | 14624                                                       | 15234                                                  | 4265                                              |
| 50-54     | 0.00621                      | 12329                                                       | 13277                                                  | 2845                                              |
| 55-59     | 0.00823                      | 4168                                                        | 10122                                                  | 4168                                              |

†Values used in this table are for the urban population

1 Initial value used in the stock of not-overweight population in 2005 for middle SES.

2 Initial value used in the stock of overweight population in 2005 for middle SES.

3 Initial value used in the stock of obese population in 2005 for middle SES.

**Table 100. Women mortality rates and population size by age group for the middle socioeconomic status population (Pacifica region) †**

| Age group | Mortality rates (R) (%/year) | Not- overweight women in 2005 (Number of people) <sup>1</sup> | Overweight women in 2005 (Number of people) <sup>2</sup> | Obese women in 2005 (Number of people) <sup>3</sup> |
|-----------|------------------------------|---------------------------------------------------------------|----------------------------------------------------------|-----------------------------------------------------|
| 0-4       | 0.00252                      | 43117                                                         | 13175                                                    | 1996                                                |
| 5-9       | 0.00019                      | 62942                                                         | 8255                                                     | 2064                                                |
| 10-14     | 0.00028                      | 49298                                                         | 8599                                                     | 5732                                                |
| 15-19     | 0.00059                      | 57171                                                         | 9528                                                     | 1270                                                |
| 20-24     | 0.00085                      | 46442                                                         | 13638                                                    | 2580                                                |
| 25-29     | 0.00095                      | 40211                                                         | 21210                                                    | 7070                                                |
| 30-34     | 0.00101                      | 28547                                                         | 22463                                                    | 11699                                               |
| 35-39     | 0.00132                      | 24950                                                         | 19960                                                    | 16079                                               |
| 40-44     | 0.00157                      | 13218                                                         | 18219                                                    | 14647                                               |
| 45-49     | 0.00235                      | 10121                                                         | 15181                                                    | 16101                                               |
| 50-54     | 0.00354                      | 9248                                                          | 14334                                                    | 11097                                               |
| 55-59     | 0.00526                      | 4900                                                          | 7043                                                     | 10412                                               |

†Values used in this table are for the urban population

1 Initial value used in the stock of not-overweight population in 2005 for middle SES.

2 Initial value used in the stock of overweight population in 2005 for middle SES.

3 Initial value used in the stock of obese population in 2005 for middle SES.

**Table 101. Man mortality rates and population size by age group for the higher socioeconomic status population (Pacifica region) †**

| Age group | Mortality rates (R) (%/year) | Not- overweight men in 2005 (Number of people) <sup>1</sup> | Overweight men in 2005 (Number of people) <sup>2</sup> | Obese men in 2005 (Number of people) <sup>3</sup> |
|-----------|------------------------------|-------------------------------------------------------------|--------------------------------------------------------|---------------------------------------------------|
| 0-4       | 0.00307                      | 75121                                                       | 16948                                                  | 4581                                              |
| 5-9       | 0.00033                      | 76732                                                       | 16724                                                  | 9837                                              |
| 10-14     | 0.00038                      | 74291                                                       | 17227                                                  | 4307                                              |
| 15-19     | 0.00275                      | 88908                                                       | 16576                                                  | 3767                                              |
| 20-24     | 0.00451                      | 76744                                                       | 17796                                                  | 5005                                              |
| 25-29     | 0.00478                      | 51692                                                       | 32995                                                  | 7699                                              |
| 30-34     | 0.00447                      | 35480                                                       | 30902                                                  | 10873                                             |
| 35-39     | 0.00378                      | 27427                                                       | 35775                                                  | 15502                                             |
| 40-44     | 0.00398                      | 25420                                                       | 42972                                                  | 16342                                             |
| 45-49     | 0.00447                      | 15234                                                       | 40826                                                  | 12796                                             |
| 50-54     | 0.00621                      | 19916                                                       | 30348                                                  | 9958                                              |
| 55-59     | 0.00823                      | 15481                                                       | 25008                                                  | 6550                                              |

†Values used in this table are for the urban population

1 Initial value used in the stock of not-overweight population in 2005 for higher SES.

2 Initial value used in the stock of overweight population in 2005 for higher SES.

3 Initial value used in the stock of obese population in 2005 for higher SES.

**Table 102. Women mortality rates and population size by age group for the higher socioeconomic status population (Pacifica region) †**

| Age group | Mortality rates (R) (%/year) | Not- overweight women in 2005 (Number of people) <sup>1</sup> | Overweight women in 2005 (Number of people) <sup>2</sup> | Obese women in 2005 (Number of people) <sup>3</sup> |
|-----------|------------------------------|---------------------------------------------------------------|----------------------------------------------------------|-----------------------------------------------------|
|-----------|------------------------------|---------------------------------------------------------------|----------------------------------------------------------|-----------------------------------------------------|

|       |         |       |       |       |
|-------|---------|-------|-------|-------|
| 0-4   | 0.00252 | 66710 | 19848 | 6616  |
| 5-9   | 0.00019 | 71489 | 18330 | 10082 |
| 10-14 | 0.00028 | 78415 | 9013  | 5408  |
| 15-19 | 0.00059 | 84013 | 22597 | 2897  |
| 20-24 | 0.00085 | 83064 | 19301 | 3447  |
| 25-29 | 0.00095 | 64268 | 25954 | 10711 |
| 30-34 | 0.00101 | 45875 | 27973 | 13427 |
| 35-39 | 0.00132 | 38828 | 40279 | 13426 |
| 40-44 | 0.00157 | 35239 | 45052 | 20519 |
| 45-49 | 0.00235 | 22327 | 35291 | 25928 |
| 50-54 | 0.00354 | 19776 | 27820 | 25809 |
| 55-59 | 0.00526 | 14152 | 21409 | 21409 |

†Values used in this table are for the urban population

<sup>1</sup> Initial value used in the stock of not-overweight population in 2005 for higher SES.

<sup>2</sup> Initial value used in the stock of overweight population in 2005 for higher SES.

<sup>3</sup> Initial value used in the stock of obese population in 2005 for higher SES.

**Table 103. Data and projections of the Fertility rates by department and Region (Pacifica region)†**

| Year | Fecundity Rate<br>Depto 19 | Fecundity<br>Rate<br>Depto 27 | Fecundity<br>Rate<br>Depto 52 | Fecundity<br>Rate<br>Depto 76 | Average<br>Region<br>Fecundity<br>Rate |
|------|----------------------------|-------------------------------|-------------------------------|-------------------------------|----------------------------------------|
| 2005 | 2,9221                     | 4,2998                        | 2,8307                        | 2,1453                        | 3,049                                  |
| 2006 | 2,8724                     | 4,2157                        | 2,7773                        | 2,1232                        | 2,997                                  |
| 2007 | 2,8227                     | 4,1316                        | 2,7239                        | 2,1011                        | 2,945                                  |
| 2008 | 2,773                      | 4,0475                        | 2,6705                        | 2,079                         | 2,893                                  |
| 2009 | 2,7509                     | 3,9639                        | 2,6396                        | 2,0708                        | 2,856                                  |
| 2010 | 2,7288                     | 3,8803                        | 2,6087                        | 2,0626                        | 2,820                                  |
| 2011 | 2,7067                     | 3,7967                        | 2,5778                        | 2,0544                        | 2,784                                  |
| 2012 | 2,6846                     | 3,7131                        | 2,5469                        | 2,0462                        | 2,748                                  |
| 2013 | 2,6625                     | 3,6295                        | 2,516                         | 2,038                         | 2,712                                  |
| 2014 | 2,6518                     | 3,5632                        | 2,4997                        | 2,035                         | 2,687                                  |
| 2015 | 2,6411                     | 3,4969                        | 2,4834                        | 2,032                         | 2,663                                  |
| 2016 | 2,6304                     | 3,4306                        | 2,4671                        | 2,029                         | 2,639                                  |
| 2017 | 2,6197                     | 3,3643                        | 2,4508                        | 2,026                         | 2,615                                  |
| 2018 | 2,609                      | 3,298                         | 2,4345                        | 2,023                         | 2,591                                  |
| 2019 | 2,5983                     | 3,2317                        | 2,4182                        | 2,02                          | 2,567                                  |
| 2020 | 2,5876                     | 3,1654                        | 2,4019                        | 2,017                         | 2,543                                  |
| 2021 | 2,5769                     | 3,0991                        | 2,3856                        | 2,014                         | 2,519                                  |
| 2022 | 2,5662                     | 3,0328                        | 2,3693                        | 2,011                         | 2,495                                  |
| 2023 | 2,5555                     | 2,9665                        | 2,353                         | 2,008                         | 2,471                                  |
| 2024 | 2,5448                     | 2,9002                        | 2,3367                        | 2,005                         | 2,447                                  |
| 2025 | 2,5341                     | 2,8339                        | 2,3204                        | 2,002                         | 2,423                                  |

| Year | Fecundity Rate Depto 19 | Fecundity Rate Depto 27 | Fecundity Rate Depto 52 | Fecundity Rate Depto 76 | Average Region Fecundity Rate |
|------|-------------------------|-------------------------|-------------------------|-------------------------|-------------------------------|
| 2026 | 2,5234                  | 2,7676                  | 2,3041                  | 1,999                   | 2,399                         |
| 2027 | 2,5127                  | 2,7013                  | 2,2878                  | 1,996                   | 2,374                         |
| 2028 | 2,502                   | 2,635                   | 2,2715                  | 1,993                   | 2,350                         |
| 2029 | 2,4913                  | 2,5687                  | 2,2552                  | 1,99                    | 2,326                         |
| 2030 | 2,4806                  | 2,5024                  | 2,2389                  | 1,987                   | 2,302                         |

† Data of Fertility rate of DANE [1] was used to forecast the department's fertility rate from 2005 to 2030. Holt-Winters no seasonal method in EViews 5 (Quantitative Micro Software, LLC) was used to forecast the fertility rate. In the SD model we used data from 2005 to 2030 and the region fertility rate was calculated as the average of all departments' fertility rates.

**Table 104. Fraction of births by departments, body mass index category, and socioeconomic status (Pacifica region) †**

| Population group |                 | Lower SES (%/year) | Middle SES (%/year) | Higher SES (%/year) | Complete Urban Population (%/year) |
|------------------|-----------------|--------------------|---------------------|---------------------|------------------------------------|
| Department 19    | Not- overweight | 83,33%             | 75,00%              | 72,73%              | 78,05%                             |
|                  | Overweight      | 11,11%             | 25,00%              | 27,27%              | 19,51%                             |
|                  | Obese           | 5,56%              | 0,00%               | 0,00%               | 2,44%                              |
| Department 27    | Not- overweight | 75,00%             | 60,00%              | 80,00%              | 73,08%                             |
|                  | Overweight      | 18,75%             | 0,00%               | 20,00%              | 15,38%                             |
|                  | Obese           | 6,25%              | 40,00%              | 0,00%               | 11,54%                             |
| Department 52    | Not- overweight | 69,23%             | 83,33%              | 68,75%              | 73,17%                             |
|                  | Overweight      | 23,08%             | 8,33%               | 31,25%              | 21,95%                             |
|                  | Obese           | 7,69%              | 8,33%               | 0,00%               | 4,88%                              |
| Department 76    | Not- overweight | 84,38%             | 81,82%              | 80,00%              | 81,74%                             |
|                  | Overweight      | 9,38%              | 18,18%              | 16,00%              | 14,78%                             |
|                  | Obese           | 6,25%              | 0,00%               | 4,00%               | 3,48%                              |

† The fractions of births by each BMI category correspond to the prevalences by BMI category of children aged 0 to 12 months

**Table 105. Prevalent rates of entire population by age group, and body mass index category (Pacifica region)**

| Departments   | Age group | Not- overweight in 2005 | Overweight in 2005 | Obese in 2005 | Not- overweight in 2010 | Overweight in 2010 | Obese in 2010 |
|---------------|-----------|-------------------------|--------------------|---------------|-------------------------|--------------------|---------------|
| Department 19 | 0-4       | 0.75172                 | 0.19310            | 0.05517       | 0.68485                 | 0.23030            | 0.08485       |
|               | 5-9       | 0.84524                 | 0.10714            | 0.04762       | 0.73418                 | 0.19620            | 0.06962       |
|               | 10-14     | 0.82143                 | 0.16667            | 0.01190       | 0.70202                 | 0.21717            | 0.08081       |
|               | 15-19     | 0.80000                 | 0.17692            | 0.02308       | 0.76471                 | 0.20321            | 0.03209       |
|               | 20-24     | 0.80226                 | 0.19209            | 0.00565       | 0.72789                 | 0.19048            | 0.08163       |
|               | 25-29     | 0.67717                 | 0.22047            | 0.10236       | 0.56338                 | 0.29577            | 0.14085       |
|               | 30-34     | 0.59184                 | 0.29592            | 0.11224       | 0.42975                 | 0.41322            | 0.15702       |
|               | 35-39     | 0.50420                 | 0.33613            | 0.15966       | 0.38983                 | 0.40678            | 0.20339       |
|               | 40-44     | 0.51429                 | 0.35238            | 0.13333       | 0.28704                 | 0.50000            | 0.21296       |
|               | 45-49     | 0.40260                 | 0.33766            | 0.25974       | 0.36190                 | 0.34286            | 0.29524       |
|               | 50-54     | 0.40230                 | 0.33333            | 0.26437       | 0.29885                 | 0.42529            | 0.27586       |
|               | 55-59     | 0.31944                 | 0.41667            | 0.26389       | 0.26744                 | 0.45349            | 0.27907       |
| Department 27 | 0-4       | 0.78992                 | 0.16807            | 0.04202       | 0.75899                 | 0.20144            | 0.03957       |
|               | 5-9       | 0.93023                 | 0.06977            | 0.00000       | 0.85315                 | 0.10140            | 0.04545       |

| Departments   | Age group | Not- overweight in 2005 | Overweight in 2005 | Obese in 2005 | Not- overweight in 2010 | Overweight in 2010 | Obese in 2010 |
|---------------|-----------|-------------------------|--------------------|---------------|-------------------------|--------------------|---------------|
|               | 10-14     | 0.77500                 | 0.18750            | 0.03750       | 0.83730                 | 0.11508            | 0.04762       |
|               | 15-19     | 0.84071                 | 0.14159            | 0.01770       | 0.81538                 | 0.14615            | 0.03846       |
|               | 20-24     | 0.69231                 | 0.21538            | 0.09231       | 0.73077                 | 0.18803            | 0.08120       |
|               | 25-29     | 0.54128                 | 0.30275            | 0.15596       | 0.51705                 | 0.32386            | 0.15909       |
|               | 30-34     | 0.48936                 | 0.37234            | 0.13830       | 0.37903                 | 0.39516            | 0.22581       |
|               | 35-39     | 0.44048                 | 0.33333            | 0.22619       | 0.38393                 | 0.33036            | 0.28571       |
|               | 40-44     | 0.30159                 | 0.36508            | 0.33333       | 0.33600                 | 0.41600            | 0.24800       |
|               | 45-49     | 0.17105                 | 0.51316            | 0.31579       | 0.25773                 | 0.41237            | 0.32990       |
|               | 50-54     | 0.24194                 | 0.41935            | 0.33871       | 0.39796                 | 0.33673            | 0.26531       |
|               | 55-59     | 0.21277                 | 0.40426            | 0.38298       | 0.36486                 | 0.32432            | 0.31081       |
| Department 52 | 0-4       | 0.73118                 | 0.19355            | 0.07527       | 0.70051                 | 0.24365            | 0.05584       |
|               | 5-9       | 0.75556                 | 0.18889            | 0.05556       | 0.78764                 | 0.15830            | 0.05405       |
|               | 10-14     | 0.85000                 | 0.10000            | 0.05000       | 0.74161                 | 0.21812            | 0.04027       |
|               | 15-19     | 0.87200                 | 0.10400            | 0.02400       | 0.80672                 | 0.16387            | 0.02941       |
|               | 20-24     | 0.77515                 | 0.19527            | 0.02959       | 0.71642                 | 0.23881            | 0.04478       |
|               | 25-29     | 0.56395                 | 0.37209            | 0.06395       | 0.56742                 | 0.33708            | 0.09551       |
|               | 30-34     | 0.42553                 | 0.47518            | 0.09929       | 0.41860                 | 0.45349            | 0.12791       |
|               | 35-39     | 0.39735                 | 0.47682            | 0.12583       | 0.39306                 | 0.37572            | 0.23121       |
|               | 40-44     | 0.31250                 | 0.46875            | 0.21875       | 0.28571                 | 0.45455            | 0.25974       |
|               | 45-49     | 0.25191                 | 0.37405            | 0.37405       | 0.31690                 | 0.43662            | 0.24648       |
|               | 50-54     | 0.34653                 | 0.36634            | 0.28713       | 0.26471                 | 0.45098            | 0.28431       |
|               | 55-59     | 0.23596                 | 0.37079            | 0.39326       | 0.17073                 | 0.43902            | 0.39024       |
| Department 76 | 0-4       | 0.78571                 | 0.16117            | 0.05311       | 0.75436                 | 0.17456            | 0.07107       |
|               | 5-9       | 0.80287                 | 0.13262            | 0.06452       | 0.72822                 | 0.17770            | 0.09408       |
|               | 10-14     | 0.84074                 | 0.10000            | 0.05926       | 0.74078                 | 0.18046            | 0.07876       |
|               | 15-19     | 0.82703                 | 0.14595            | 0.02703       | 0.79709                 | 0.15921            | 0.04370       |
|               | 20-24     | 0.78309                 | 0.17279            | 0.04412       | 0.70483                 | 0.21628            | 0.07888       |
|               | 25-29     | 0.62292                 | 0.27083            | 0.10625       | 0.57009                 | 0.31242            | 0.11749       |
|               | 30-34     | 0.52784                 | 0.30067            | 0.17149       | 0.44330                 | 0.39175            | 0.16495       |
|               | 35-39     | 0.45000                 | 0.38095            | 0.16905       | 0.37458                 | 0.40803            | 0.21739       |
|               | 40-44     | 0.35867                 | 0.43468            | 0.20665       | 0.37426                 | 0.43195            | 0.19379       |
|               | 45-49     | 0.31871                 | 0.46784            | 0.21345       | 0.34506                 | 0.39698            | 0.25796       |
|               | 50-54     | 0.33623                 | 0.43188            | 0.23188       | 0.29562                 | 0.39234            | 0.31204       |
|               | 55-59     | 0.31132                 | 0.41509            | 0.27358       | 0.27902                 | 0.43750            | 0.28348       |

**Table 106. Prevalent rates of lower socioeconomic status population by age group, and body mass index category (Pacifica region)**

| Departments   | Age group | Not- overweight in 2005 | Overweight in 2005 | Obese in 2005 | Not- overweight in 2010 | Overweight in 2010 | Obese in 2010 |
|---------------|-----------|-------------------------|--------------------|---------------|-------------------------|--------------------|---------------|
| Department 19 | 0-4       | 0.82353                 | 0.10294            | 0.07353       | 0.71014                 | 0.21739            | 0.07246       |
|               | 5-9       | 0.93103                 | 0.06897            | 0.00000       | 0.77193                 | 0.17544            | 0.05263       |
|               | 10-14     | 0.85294                 | 0.14706            | 0.00000       | 0.70886                 | 0.18987            | 0.10127       |
|               | 15-19     | 0.87805                 | 0.12195            | 0.00000       | 0.77419                 | 0.22581            | 0.00000       |
|               | 20-24     | 0.83333                 | 0.16667            | 0.00000       | 0.68333                 | 0.23333            | 0.08333       |
|               | 25-29     | 0.59459                 | 0.21622            | 0.18919       | 0.52273                 | 0.34091            | 0.13636       |

| Departments   | Age group     | Not- overweight in 2005 | Overweight in 2005 | Obese in 2005 | Not- overweight in 2010 | Overweight in 2010 | Obese in 2010 |
|---------------|---------------|-------------------------|--------------------|---------------|-------------------------|--------------------|---------------|
|               | 30-34         | 0.58974                 | 0.20513            | 0.20513       | 0.35714                 | 0.42857            | 0.21429       |
|               | 35-39         | 0.52381                 | 0.35714            | 0.11905       | 0.39394                 | 0.36364            | 0.24242       |
|               | 40-44         | 0.62500                 | 0.18750            | 0.18750       | 0.31250                 | 0.50000            | 0.18750       |
|               | 45-49         | 0.66667                 | 0.16667            | 0.16667       | 0.41667                 | 0.29167            | 0.29167       |
|               | 50-54         | 0.57143                 | 0.17857            | 0.25000       | 0.40741                 | 0.37037            | 0.22222       |
|               | 55-59         | 0.38462                 | 0.30769            | 0.30769       | 0.33333                 | 0.40000            | 0.26667       |
| Department 27 | 0-4           | 0.80952                 | 0.15476            | 0.03571       | 0.76226                 | 0.20000            | 0.03774       |
|               | 5-9           | 0.96875                 | 0.03125            | 0.00000       | 0.85348                 | 0.09890            | 0.04762       |
|               | 10-14         | 0.83333                 | 0.14583            | 0.02083       | 0.82759                 | 0.12069            | 0.05172       |
|               | 15-19         | 0.85246                 | 0.13115            | 0.01639       | 0.81667                 | 0.15417            | 0.02917       |
|               | 20-24         | 0.74684                 | 0.17722            | 0.07595       | 0.72646                 | 0.19283            | 0.08072       |
|               | 25-29         | 0.63043                 | 0.21739            | 0.15217       | 0.49677                 | 0.33548            | 0.16774       |
|               | 30-34         | 0.57692                 | 0.34615            | 0.07692       | 0.37719                 | 0.41228            | 0.21053       |
|               | 35-39         | 0.54167                 | 0.31250            | 0.14583       | 0.39048                 | 0.31429            | 0.29524       |
|               | 40-44         | 0.41379                 | 0.31034            | 0.27586       | 0.35088                 | 0.40351            | 0.24561       |
|               | 45-49         | 0.23404                 | 0.46809            | 0.29787       | 0.24731                 | 0.43011            | 0.32258       |
|               | 50-54         | 0.28571                 | 0.50000            | 0.21429       | 0.37931                 | 0.36782            | 0.25287       |
|               | 55-59         | 0.26087                 | 0.43478            | 0.30435       | 0.38095                 | 0.31746            | 0.30159       |
|               | Department 52 | 0-4                     | 0.68852            | 0.18033       | 0.13115                 | 0.70370            | 0.24074       |
| 5-9           |               | 0.77778                 | 0.14815            | 0.07407       | 0.80986                 | 0.14789            | 0.04225       |
| 10-14         |               | 0.93750                 | 0.03125            | 0.03125       | 0.74324                 | 0.22297            | 0.03378       |
| 15-19         |               | 0.91892                 | 0.05405            | 0.02703       | 0.76471                 | 0.19118            | 0.04412       |
| 20-24         |               | 0.78125                 | 0.18750            | 0.03125       | 0.70787                 | 0.25843            | 0.03371       |
| 25-29         |               | 0.60870                 | 0.28261            | 0.10870       | 0.58904                 | 0.28767            | 0.12329       |
| 30-34         |               | 0.46429                 | 0.46429            | 0.07143       | 0.35714                 | 0.48571            | 0.15714       |
| 35-39         |               | 0.51351                 | 0.32432            | 0.16216       | 0.38806                 | 0.41791            | 0.19403       |
| 40-44         |               | 0.39286                 | 0.39286            | 0.21429       | 0.31034                 | 0.46552            | 0.22414       |
| 45-49         |               | 0.35714                 | 0.32143            | 0.32143       | 0.32558                 | 0.37209            | 0.30233       |
| 50-54         |               | 0.56250                 | 0.12500            | 0.31250       | 0.38462                 | 0.28205            | 0.33333       |
| 55-59         |               | 0.53333                 | 0.26667            | 0.20000       | 0.20690                 | 0.48276            | 0.31034       |
| Department 76 |               | 0-4                     | 0.85600            | 0.12000       | 0.02400                 | 0.73826            | 0.22819       |
|               | 5-9           | 0.86957                 | 0.10870            | 0.02174       | 0.84146                 | 0.14634            | 0.01220       |
|               | 10-14         | 0.94643                 | 0.05357            | 0.00000       | 0.84568                 | 0.12346            | 0.03086       |
|               | 15-19         | 0.85294                 | 0.11765            | 0.02941       | 0.82677                 | 0.12598            | 0.04724       |
|               | 20-24         | 0.81609                 | 0.13793            | 0.04598       | 0.68868                 | 0.19811            | 0.11321       |
|               | 25-29         | 0.64935                 | 0.27273            | 0.07792       | 0.52747                 | 0.32967            | 0.14286       |
|               | 30-34         | 0.60317                 | 0.20635            | 0.19048       | 0.42466                 | 0.35616            | 0.21918       |
|               | 35-39         | 0.55556                 | 0.30159            | 0.14286       | 0.40000                 | 0.32308            | 0.27692       |
|               | 40-44         | 0.42029                 | 0.43478            | 0.14493       | 0.58333                 | 0.30000            | 0.11667       |
|               | 45-49         | 0.47619                 | 0.40476            | 0.11905       | 0.45902                 | 0.24590            | 0.29508       |
|               | 50-54         | 0.50000                 | 0.33333            | 0.16667       | 0.46000                 | 0.36000            | 0.18000       |
|               | 55-59         | 0.44828                 | 0.37931            | 0.17241       | 0.37500                 | 0.42500            | 0.20000       |

**Table 107. Prevalent rates of middle socioeconomic status population by age group, and body mass index category (Pacifica region)**



| Departments      | Age group | Not- overweight<br>in 2005 | Overweight<br>in 2005 | Obese in<br>2005 | Not- overweight<br>in 2010 | Overweight<br>in 2010 | Obese in<br>2010 |
|------------------|-----------|----------------------------|-----------------------|------------------|----------------------------|-----------------------|------------------|
| Department<br>19 | 0-4       | 0.74359                    | 0.23077               | 0.02564          | 0.68354                    | 0.21519               | 0.10127          |
|                  | 5-9       | 0.85714                    | 0.10714               | 0.03571          | 0.69014                    | 0.25352               | 0.05634          |
|                  | 10-14     | 0.80769                    | 0.19231               | 0.00000          | 0.67500                    | 0.27500               | 0.05000          |
|                  | 15-19     | 0.77143                    | 0.20000               | 0.02857          | 0.75510                    | 0.20408               | 0.04082          |
|                  | 20-24     | 0.78378                    | 0.21622               | 0.00000          | 0.75000                    | 0.15625               | 0.09375          |
|                  | 25-29     | 0.63158                    | 0.28947               | 0.07895          | 0.52239                    | 0.28358               | 0.19403          |
|                  | 30-34     | 0.68000                    | 0.28000               | 0.04000          | 0.50769                    | 0.36923               | 0.12308          |
|                  | 35-39     | 0.50000                    | 0.26923               | 0.23077          | 0.28571                    | 0.50000               | 0.21429          |
|                  | 40-44     | 0.44000                    | 0.40000               | 0.16000          | 0.23404                    | 0.46809               | 0.29787          |
|                  | 45-49     | 0.43478                    | 0.30435               | 0.26087          | 0.31481                    | 0.33333               | 0.35185          |
|                  | 50-54     | 0.35294                    | 0.35294               | 0.29412          | 0.23529                    | 0.44118               | 0.32353          |
| 55-59            | 0.32000   | 0.40000                    | 0.28000               | 0.28947          | 0.42105                    | 0.28947               |                  |
| Department<br>27 | 0-4       | 0.73684                    | 0.15789               | 0.10526          | 0.75000                    | 0.16667               | 0.08333          |
|                  | 5-9       | 0.88889                    | 0.11111               | 0.00000          | 0.84615                    | 0.15385               | 0.00000          |
|                  | 10-14     | 0.60000                    | 0.32000               | 0.08000          | 0.94737                    | 0.05263               | 0.00000          |
|                  | 15-19     | 0.77778                    | 0.18519               | 0.03704          | 0.78947                    | 0.05263               | 0.15789          |
|                  | 20-24     | 0.55172                    | 0.27586               | 0.17241          | 0.75000                    | 0.12500               | 0.12500          |
|                  | 25-29     | 0.48571                    | 0.34286               | 0.17143          | 0.70588                    | 0.17647               | 0.11765          |
|                  | 30-34     | 0.44828                    | 0.34483               | 0.20690          | 0.44444                    | 0.11111               | 0.44444          |
|                  | 35-39     | 0.31818                    | 0.31818               | 0.36364          | 0.33333                    | 0.66667               | 0.00000          |
|                  | 40-44     | 0.17391                    | 0.47826               | 0.34783          | 0.10000                    | 0.60000               | 0.30000          |
|                  | 45-49     | 0.11111                    | 0.50000               | 0.38889          | 0.50000                    | 0.00000               | 0.50000          |
|                  | 50-54     | 0.16667                    | 0.41667               | 0.41667          | 0.54545                    | 0.09091               | 0.36364          |
| 55-59            | 0.18182   | 0.18182                    | 0.63636               | 0.30000          | 0.40000                    | 0.30000               |                  |
| Department<br>52 | 0-4       | 0.70909                    | 0.23636               | 0.05455          | 0.67143                    | 0.25714               | 0.07143          |
|                  | 5-9       | 0.80645                    | 0.19355               | 0.00000          | 0.76087                    | 0.16304               | 0.07609          |
|                  | 10-14     | 0.81579                    | 0.10526               | 0.07895          | 0.75000                    | 0.20370               | 0.04630          |
|                  | 15-19     | 0.91892                    | 0.08108               | 0.00000          | 0.84810                    | 0.13924               | 0.01266          |
|                  | 20-24     | 0.75610                    | 0.21951               | 0.02439          | 0.70423                    | 0.25352               | 0.04225          |
|                  | 25-29     | 0.54902                    | 0.43137               | 0.01961          | 0.53750                    | 0.36250               | 0.10000          |
|                  | 30-34     | 0.37255                    | 0.54902               | 0.07843          | 0.46875                    | 0.40625               | 0.12500          |
|                  | 35-39     | 0.43902                    | 0.39024               | 0.17073          | 0.38554                    | 0.38554               | 0.22892          |
|                  | 40-44     | 0.27027                    | 0.40541               | 0.32432          | 0.30159                    | 0.42857               | 0.26984          |
|                  | 45-49     | 0.25000                    | 0.32143               | 0.42857          | 0.34848                    | 0.42424               | 0.22727          |
|                  | 50-54     | 0.28000                    | 0.44000               | 0.28000          | 0.19444                    | 0.55556               | 0.25000          |
| 55-59            | 0.18519   | 0.37037                    | 0.44444               | 0.19355          | 0.35484                    | 0.45161               |                  |
| Department<br>76 | 0-4       | 0.77576                    | 0.16970               | 0.05455          | 0.75102                    | 0.18367               | 0.06531          |
|                  | 5-9       | 0.88750                    | 0.08750               | 0.02500          | 0.78226                    | 0.13710               | 0.08065          |
|                  | 10-14     | 0.81928                    | 0.08434               | 0.09639          | 0.75899                    | 0.16906               | 0.07194          |
|                  | 15-19     | 0.90816                    | 0.07143               | 0.02041          | 0.81423                    | 0.16996               | 0.01581          |
|                  | 20-24     | 0.76331                    | 0.20118               | 0.03550          | 0.70588                    | 0.23039               | 0.06373          |
|                  | 25-29     | 0.64138                    | 0.24138               | 0.11724          | 0.51905                    | 0.35238               | 0.12857          |
|                  | 30-34     | 0.50000                    | 0.31746               | 0.18254          | 0.44388                    | 0.38265               | 0.17347          |
|                  | 35-39     | 0.49074                    | 0.35185               | 0.15741          | 0.33784                    | 0.42568               | 0.23649          |
| 40-44            | 0.42593   | 0.36111                    | 0.21296               | 0.46875          | 0.36250                    | 0.16875               |                  |

| Departments | Age group | Not- overweight in 2005 | Overweight in 2005 | Obese in 2005 | Not- overweight in 2010 | Overweight in 2010 | Obese in 2010 |
|-------------|-----------|-------------------------|--------------------|---------------|-------------------------|--------------------|---------------|
|             | 45-49     | 0.35065                 | 0.42857            | 0.22078       | 0.28448                 | 0.50000            | 0.21552       |
|             | 50-54     | 0.38272                 | 0.45679            | 0.16049       | 0.29839                 | 0.26613            | 0.43548       |
|             | 55-59     | 0.19512                 | 0.43902            | 0.36585       | 0.32558                 | 0.40698            | 0.26744       |

**Table 108. Prevalent rates of higher socioeconomic status population by age group, and body mass index category (Pacifica region)**

| Departments   | Age group | Not- overweight in 2005 | Overweight in 2005 | Obese in 2005 | Not- overweight in 2010 | Overweight in 2010 | Obese in 2010 |
|---------------|-----------|-------------------------|--------------------|---------------|-------------------------|--------------------|---------------|
| Department 19 | 0-4       | 0.63158                 | 0.31579            | 0.05263       | 0.58824                 | 0.35294            | 0.05882       |
|               | 5-9       | 0.74074                 | 0.14815            | 0.11111       | 0.76667                 | 0.10000            | 0.13333       |
|               | 10-14     | 0.79167                 | 0.16667            | 0.04167       | 0.74359                 | 0.15385            | 0.10256       |
|               | 15-19     | 0.75926                 | 0.20370            | 0.03704       | 0.77778                 | 0.14815            | 0.07407       |
|               | 20-24     | 0.78750                 | 0.20000            | 0.01250       | 0.78261                 | 0.17391            | 0.04348       |
|               | 25-29     | 0.76923                 | 0.17308            | 0.05769       | 0.70968                 | 0.25806            | 0.03226       |
|               | 30-34     | 0.52941                 | 0.41176            | 0.05882       | 0.32143                 | 0.50000            | 0.17857       |
|               | 35-39     | 0.49020                 | 0.35294            | 0.15686       | 0.58621                 | 0.27586            | 0.13793       |
|               | 40-44     | 0.47917                 | 0.43750            | 0.08333       | 0.34483                 | 0.55172            | 0.10345       |
|               | 45-49     | 0.25000                 | 0.44444            | 0.30556       | 0.40741                 | 0.40741            | 0.18519       |
|               | 50-54     | 0.30952                 | 0.42857            | 0.26190       | 0.26923                 | 0.46154            | 0.26923       |
| 55-59         | 0.29412   | 0.47059                 | 0.23529            | 0.21212       | 0.51515                 | 0.27273            |               |
| Department 52 | 0-4       | 0.78571                 | 0.17143            | 0.04286       | 0.78947                 | 0.21053            | 0.00000       |
|               | 5-9       | 0.68750                 | 0.21875            | 0.09375       | 0.76000                 | 0.20000            | 0.04000       |
|               | 10-14     | 0.80000                 | 0.16667            | 0.03333       | 0.71429                 | 0.23810            | 0.04762       |
|               | 15-19     | 0.80392                 | 0.15686            | 0.03922       | 0.91304                 | 0.08696            | 0.00000       |
|               | 20-24     | 0.78125                 | 0.18750            | 0.03125       | 0.75610                 | 0.17073            | 0.07317       |
|               | 25-29     | 0.54667                 | 0.38667            | 0.06667       | 0.60000                 | 0.40000            | 0.00000       |
|               | 30-34     | 0.45161                 | 0.41935            | 0.12903       | 0.44737                 | 0.47368            | 0.07895       |
|               | 35-39     | 0.31507                 | 0.60274            | 0.08219       | 0.43478                 | 0.21739            | 0.34783       |
|               | 40-44     | 0.30159                 | 0.53968            | 0.15873       | 0.21212                 | 0.48485            | 0.30303       |
|               | 45-49     | 0.21333                 | 0.41333            | 0.37333       | 0.24242                 | 0.54545            | 0.21212       |
|               | 50-54     | 0.31667                 | 0.40000            | 0.28333       | 0.18519                 | 0.55556            | 0.25926       |
| 55-59         | 0.17021   | 0.40426                 | 0.42553            | 0.09091       | 0.50000                 | 0.40909            |               |
| Department 76 | 0-4       | 0.75781                 | 0.17578            | 0.06641       | 0.75781                 | 0.17578            | 0.06641       |
|               | 5-9       | 0.73856                 | 0.16340            | 0.09804       | 0.73856                 | 0.16340            | 0.09804       |
|               | 10-14     | 0.80916                 | 0.12977            | 0.06107       | 0.80916                 | 0.12977            | 0.06107       |
|               | 15-19     | 0.77941                 | 0.19118            | 0.02941       | 0.77941                 | 0.19118            | 0.02941       |
|               | 20-24     | 0.78472                 | 0.16667            | 0.04861       | 0.78472                 | 0.16667            | 0.04861       |
|               | 25-29     | 0.60465                 | 0.28682            | 0.10853       | 0.60465                 | 0.28682            | 0.10853       |
|               | 30-34     | 0.52308                 | 0.31538            | 0.16154       | 0.52308                 | 0.31538            | 0.16154       |
|               | 35-39     | 0.40562                 | 0.41365            | 0.18072       | 0.40562                 | 0.41365            | 0.18072       |
|               | 40-44     | 0.31148                 | 0.46721            | 0.22131       | 0.31148                 | 0.46721            | 0.22131       |
|               | 45-49     | 0.27803                 | 0.49327            | 0.22870       | 0.27803                 | 0.49327            | 0.22870       |
|               | 50-54     | 0.28829                 | 0.44144            | 0.27027       | 0.28829                 | 0.44144            | 0.27027       |
| 55-59         | 0.31690   | 0.41549                 | 0.26761            | 0.31690       | 0.41549                 | 0.26761            |               |

**Table 109. Mortality rates and population size by age group at the department level without segregate by socioeconomic status (Pacifica region) †**

| Departments   | Age group | Mortality rates (R) (%/year) | Not- overweight population in 2005 (Number of people)1 | Overweight population in 2005 (Number of people)2 | Obese population in 2005 (Number of people)3 |
|---------------|-----------|------------------------------|--------------------------------------------------------|---------------------------------------------------|----------------------------------------------|
| Department 19 | 0-4       | 0.00309                      | 36437                                                  | 9360                                              | 2674                                         |
|               | 5-9       | 0.00028                      | 44819                                                  | 5681                                              | 2525                                         |
|               | 10-14     | 0.00024                      | 44884                                                  | 9107                                              | 650                                          |
|               | 15-19     | 0.00181                      | 40556                                                  | 8969                                              | 1170                                         |
|               | 20-24     | 0.00250                      | 37846                                                  | 9062                                              | 267                                          |
|               | 25-29     | 0.00302                      | 26260                                                  | 8550                                              | 3970                                         |
|               | 30-34     | 0.00294                      | 18296                                                  | 9148                                              | 3470                                         |
|               | 35-39     | 0.00275                      | 15428                                                  | 10285                                             | 4886                                         |
|               | 40-44     | 0.00321                      | 15055                                                  | 10316                                             | 3903                                         |
|               | 45-49     | 0.00387                      | 10094                                                  | 8466                                              | 6512                                         |
|               | 50-54     | 0.00425                      | 8229                                                   | 6818                                              | 5408                                         |
| 55-59         | 0.00776   | 4814                         | 6280                                                   | 3977                                              |                                              |
| Department 27 | 0-4       | 0.00440                      | 22963                                                  | 4886                                              | 1221                                         |
|               | 5-9       | 0.00059                      | 26607                                                  | 1996                                              | 0                                            |
|               | 10-14     | 0.00065                      | 22659                                                  | 5482                                              | 1096                                         |
|               | 15-19     | 0.00136                      | 23515                                                  | 3960                                              | 495                                          |
|               | 20-24     | 0.00206                      | 13767                                                  | 4283                                              | 1836                                         |
|               | 25-29     | 0.00235                      | 8285                                                   | 4634                                              | 2387                                         |
|               | 30-34     | 0.00185                      | 5809                                                   | 4420                                              | 1642                                         |
|               | 35-39     | 0.00216                      | 4900                                                   | 3708                                              | 2516                                         |
|               | 40-44     | 0.00200                      | 3016                                                   | 3650                                              | 3333                                         |
|               | 45-49     | 0.00381                      | 1573                                                   | 4719                                              | 2904                                         |
|               | 50-54     | 0.00436                      | 1608                                                   | 2787                                              | 2251                                         |
| 55-59         | 0.00591   | 1044                         | 1983                                                   | 1879                                              |                                              |
| Department 52 | 0-4       | 0.00270                      | 52291                                                  | 13842                                             | 5383                                         |
|               | 5-9       | 0.00015                      | 55525                                                  | 13881                                             | 4083                                         |
|               | 10-14     | 0.00019                      | 62976                                                  | 7409                                              | 3704                                         |
|               | 15-19     | 0.00074                      | 63642                                                  | 7590                                              | 1752                                         |
|               | 20-24     | 0.00147                      | 53883                                                  | 13574                                             | 2057                                         |
|               | 25-29     | 0.00133                      | 33581                                                  | 22157                                             | 3808                                         |
|               | 30-34     | 0.00144                      | 20726                                                  | 23144                                             | 4836                                         |
|               | 35-39     | 0.00134                      | 19595                                                  | 23514                                             | 6205                                         |
|               | 40-44     | 0.00181                      | 13464                                                  | 20196                                             | 9425                                         |
|               | 45-49     | 0.00200                      | 8963                                                   | 13308                                             | 13308                                        |
|               | 50-54     | 0.00261                      | 10100                                                  | 10678                                             | 8369                                         |
| 55-59         | 0.00450   | 5403                         | 8491                                                   | 9006                                              |                                              |
| Department 76 | 0-4       | 0.00269                      | 240302                                                 | 49293                                             | 16244                                        |
|               | 5-9       | 0.00025                      | 265413                                                 | 43840                                             | 21328                                        |
|               | 10-14     | 0.00035                      | 292694                                                 | 34814                                             | 20630                                        |
|               | 15-19     | 0.00196                      | 278955                                                 | 49227                                             | 9116                                         |

| Departments | Age group | Mortality rates (R) (%/year) | Not- overweight population in 2005 (Number of people)1 | Overweight population in 2005 (Number of people)2 | Obese population in 2005 (Number of people)3 |
|-------------|-----------|------------------------------|--------------------------------------------------------|---------------------------------------------------|----------------------------------------------|
|             | 20-24     | 0.00299                      | 248696                                                 | 54876                                             | 14011                                        |
|             | 25-29     | 0.00317                      | 181222                                                 | 78792                                             | 30911                                        |
|             | 30-34     | 0.00298                      | 140126                                                 | 79819                                             | 45526                                        |
|             | 35-39     | 0.00280                      | 120509                                                 | 102018                                            | 45270                                        |
|             | 40-44     | 0.00298                      | 91932                                                  | 111415                                            | 52968                                        |
|             | 45-49     | 0.00373                      | 68100                                                  | 99963                                             | 45608                                        |
|             | 50-54     | 0.00562                      | 58095                                                  | 74622                                             | 40065                                        |
|             | 55-59     | 0.00749                      | 41714                                                  | 55618                                             | 36657                                        |

<sup>†</sup>Values used in this table are for the urban population

<sup>1</sup> Initial value used in the stock of not-overweight population in 2005.

<sup>2</sup> Initial value used in the stock of overweight population in 2005.

<sup>3</sup> Initial value used in the stock of obese population in 2005.

**Table 110. Mortality rates and population size by age group at the department level for the lower socioeconomic status population (Pacifica region) <sup>†</sup>**

| Departments   | Age group | Mortality rates (R) (%/year) | Not- overweight population in 2005 (Number of people)1 | Overweight population in 2005 (Number of people)2 | Obese population in 2005 (Number of people)3 |
|---------------|-----------|------------------------------|--------------------------------------------------------|---------------------------------------------------|----------------------------------------------|
| Department 19 | 0-4       | 0.00309                      | 18720                                                  | 2340                                              | 1671                                         |
|               | 5-9       | 0.00028                      | 17044                                                  | 1263                                              | 0                                            |
|               | 10-14     | 0.00024                      | 18864                                                  | 3252                                              | 0                                            |
|               | 15-19     | 0.00181                      | 14039                                                  | 1950                                              | 0                                            |
|               | 20-24     | 0.00250                      | 13326                                                  | 2665                                              | 0                                            |
|               | 25-29     | 0.00302                      | 6718                                                   | 2443                                              | 2137                                         |
|               | 30-34     | 0.00294                      | 7255                                                   | 2524                                              | 2524                                         |
|               | 35-39     | 0.00275                      | 5657                                                   | 3857                                              | 1286                                         |
|               | 40-44     | 0.00321                      | 5576                                                   | 1673                                              | 1673                                         |
|               | 45-49     | 0.00387                      | 3907                                                   | 977                                               | 977                                          |
|               | 50-54     | 0.00425                      | 3762                                                   | 1176                                              | 1646                                         |
|               | 55-59     | 0.00776                      | 1047                                                   | 837                                               | 837                                          |
| Department 27 | 0-4       | 0.00440                      | 5388                                                   | 1030                                              | 238                                          |
|               | 5-9       | 0.00059                      | 4569                                                   | 147                                               | 0                                            |
|               | 10-14     | 0.00065                      | 5053                                                   | 884                                               | 126                                          |
|               | 15-19     | 0.00136                      | 4382                                                   | 674                                               | 84                                           |
|               | 20-24     | 0.00206                      | 2375                                                   | 564                                               | 242                                          |
|               | 25-29     | 0.00235                      | 1548                                                   | 534                                               | 374                                          |
|               | 30-34     | 0.00185                      | 961                                                    | 577                                               | 128                                          |
|               | 35-39     | 0.00216                      | 904                                                    | 521                                               | 243                                          |
|               | 40-44     | 0.00200                      | 678                                                    | 509                                               | 452                                          |
|               | 45-49     | 0.00381                      | 264                                                    | 529                                               | 336                                          |
|               | 50-54     | 0.00436                      | 231                                                    | 405                                               | 173                                          |
|               | 55-59     | 0.00591                      | 175                                                    | 292                                               | 204                                          |
| Department 52 | 0-4       | 0.00270                      | 16149                                                  | 4229                                              | 3076                                         |
|               | 5-9       | 0.00015                      | 17147                                                  | 3266                                              | 1633                                         |

| Departments   | Age group | Mortality rates (R) (%/year) | Not- overweight population in 2005 (Number of people)1 | Overweight population in 2005 (Number of people)2 | Obese population in 2005 (Number of people)3 |
|---------------|-----------|------------------------------|--------------------------------------------------------|---------------------------------------------------|----------------------------------------------|
|               | 10-14     | 0.00019                      | 22227                                                  | 741                                               | 741                                          |
|               | 15-19     | 0.00074                      | 19852                                                  | 1168                                              | 584                                          |
|               | 20-24     | 0.00147                      | 10283                                                  | 2468                                              | 411                                          |
|               | 25-29     | 0.00133                      | 9694                                                   | 4501                                              | 1731                                         |
|               | 30-34     | 0.00144                      | 4491                                                   | 4491                                              | 691                                          |
|               | 35-39     | 0.00134                      | 6205                                                   | 3919                                              | 1960                                         |
|               | 40-44     | 0.00181                      | 3703                                                   | 3703                                              | 2020                                         |
|               | 45-49     | 0.00200                      | 2716                                                   | 2444                                              | 2444                                         |
|               | 50-54     | 0.00261                      | 2597                                                   | 577                                               | 1443                                         |
|               | 55-59     | 0.00450                      | 2058                                                   | 1029                                              | 772                                          |
| Department 76 | 0-4       | 0.00269                      | 59935                                                  | 8402                                              | 1680                                         |
|               | 5-9       | 0.00025                      | 47395                                                  | 5924                                              | 1185                                         |
|               | 10-14     | 0.00035                      | 68338                                                  | 3868                                              | 0                                            |
|               | 15-19     | 0.00196                      | 52874                                                  | 7293                                              | 1823                                         |
|               | 20-24     | 0.00299                      | 41449                                                  | 7006                                              | 2335                                         |
|               | 25-29     | 0.00317                      | 30305                                                  | 12728                                             | 3637                                         |
|               | 30-34     | 0.00298                      | 22467                                                  | 7686                                              | 7095                                         |
|               | 35-39     | 0.00280                      | 22316                                                  | 12115                                             | 5739                                         |
|               | 40-44     | 0.00298                      | 17656                                                  | 18265                                             | 6088                                         |
|               | 45-49     | 0.00373                      | 12495                                                  | 10621                                             | 3124                                         |
|               | 50-54     | 0.00562                      | 10517                                                  | 7011                                              | 3506                                         |
|               | 55-59     | 0.00749                      | 8216                                                   | 6952                                              | 3160                                         |

†Values used in this table are for the urban population

<sup>1</sup> Initial value used in the stock of not-overweight population in 2005 for lower SES.

<sup>2</sup> Initial value used in the stock of overweight population in 2005 for lower SES.

<sup>3</sup> Initial value used in the stock of obese population in 2005 for lower SES.

**Table 111. Mortality rates and population size by age group at the department level for the middle socioeconomic status population (Pacifica region) †**

| Departments   | Age group | Mortality rates (R) (%/year) | Not- overweight population in 2005 (Number of people)1 | Overweight population in 2005 (Number of people)2 | Obese population in 2005 (Number of people)3 |
|---------------|-----------|------------------------------|--------------------------------------------------------|---------------------------------------------------|----------------------------------------------|
| Department 19 | 0-4       | 0.00309                      | 9694                                                   | 3009                                              | 334                                          |
|               | 5-9       | 0.00028                      | 15150                                                  | 1894                                              | 631                                          |
|               | 10-14     | 0.00024                      | 13660                                                  | 3252                                              | 0                                            |
|               | 15-19     | 0.00181                      | 10529                                                  | 2730                                              | 390                                          |
|               | 20-24     | 0.00250                      | 7729                                                   | 2132                                              | 0                                            |
|               | 25-29     | 0.00302                      | 7329                                                   | 3359                                              | 916                                          |
|               | 30-34     | 0.00294                      | 5363                                                   | 2208                                              | 315                                          |
|               | 35-39     | 0.00275                      | 3343                                                   | 1800                                              | 1543                                         |
|               | 40-44     | 0.00321                      | 3067                                                   | 2788                                              | 1115                                         |
|               | 45-49     | 0.00387                      | 3256                                                   | 2279                                              | 1954                                         |
|               | 50-54     | 0.00425                      | 1411                                                   | 1411                                              | 1176                                         |
|               | 55-59     | 0.00776                      | 1675                                                   | 2093                                              | 1465                                         |

| Departments   | Age group | Mortality rates (R) (%/year) | Not- overweight population in 2005 (Number of people) <sup>1</sup> | Overweight population in 2005 (Number of people) <sup>2</sup> | Obese population in 2005 (Number of people) <sup>3</sup> |
|---------------|-----------|------------------------------|--------------------------------------------------------------------|---------------------------------------------------------------|----------------------------------------------------------|
| Department 27 | 0-4       | 0.00440                      | 6473                                                               | 1387                                                          | 925                                                      |
|               | 5-9       | 0.00059                      | 7290                                                               | 911                                                           | 0                                                        |
|               | 10-14     | 0.00065                      | 5393                                                               | 2876                                                          | 719                                                      |
|               | 15-19     | 0.00136                      | 5762                                                               | 1372                                                          | 274                                                      |
|               | 20-24     | 0.00206                      | 3408                                                               | 1704                                                          | 1065                                                     |
|               | 25-29     | 0.00235                      | 2246                                                               | 1585                                                          | 793                                                      |
|               | 30-34     | 0.00185                      | 1493                                                               | 1149                                                          | 689                                                      |
|               | 35-39     | 0.00216                      | 910                                                                | 910                                                           | 1040                                                     |
|               | 40-44     | 0.00200                      | 446                                                                | 1227                                                          | 892                                                      |
|               | 45-49     | 0.00381                      | 230                                                                | 1035                                                          | 805                                                      |
|               | 50-54     | 0.00436                      | 260                                                                | 650                                                           | 650                                                      |
| 55-59         | 0.00591   | 173                          | 173                                                                | 604                                                           |                                                          |
| Department 52 | 0-4       | 0.00270                      | 14995                                                              | 4998                                                          | 1153                                                     |
|               | 5-9       | 0.00015                      | 20414                                                              | 4899                                                          | 0                                                        |
|               | 10-14     | 0.00019                      | 22968                                                              | 2964                                                          | 2223                                                     |
|               | 15-19     | 0.00074                      | 19852                                                              | 1752                                                          | 0                                                        |
|               | 20-24     | 0.00147                      | 12751                                                              | 3702                                                          | 411                                                      |
|               | 25-29     | 0.00133                      | 9694                                                               | 7616                                                          | 346                                                      |
|               | 30-34     | 0.00144                      | 6563                                                               | 9672                                                          | 1382                                                     |
|               | 35-39     | 0.00134                      | 5879                                                               | 5225                                                          | 2286                                                     |
|               | 40-44     | 0.00181                      | 3366                                                               | 5049                                                          | 4039                                                     |
|               | 45-49     | 0.00200                      | 1901                                                               | 2444                                                          | 3259                                                     |
|               | 50-54     | 0.00261                      | 2020                                                               | 3174                                                          | 2020                                                     |
| 55-59         | 0.00450   | 1287                         | 2573                                                               | 3088                                                          |                                                          |
| Department 76 | 0-4       | 0.00269                      | 71699                                                              | 15684                                                         | 5041                                                     |
|               | 5-9       | 0.00025                      | 84126                                                              | 8294                                                          | 2370                                                     |
|               | 10-14     | 0.00035                      | 87679                                                              | 9026                                                          | 10315                                                    |
|               | 15-19     | 0.00196                      | 81134                                                              | 6381                                                          | 1823                                                     |
|               | 20-24     | 0.00299                      | 75309                                                              | 19849                                                         | 3503                                                     |
|               | 25-29     | 0.00317                      | 56367                                                              | 21213                                                         | 10304                                                    |
|               | 30-34     | 0.00298                      | 37249                                                              | 23650                                                         | 13599                                                    |
|               | 35-39     | 0.00280                      | 33793                                                              | 24229                                                         | 10839                                                    |
|               | 40-44     | 0.00298                      | 28006                                                              | 23744                                                         | 14003                                                    |
|               | 45-49     | 0.00373                      | 16869                                                              | 20617                                                         | 10621                                                    |
|               | 50-54     | 0.00562                      | 15525                                                              | 18530                                                         | 6511                                                     |
| 55-59         | 0.00749   | 5056                         | 11376                                                              | 9480                                                          |                                                          |

† Values used in this table are for the urban population

1 Initial value used in the stock of not-overweight population in 2005 for middle SES.

2 Initial value used in the stock of overweight population in 2005 for middle SES.

3 Initial value used in the stock of obese population in 2005 for middle SES.

**Table 112. Mortality rates and population size by age group at the department level for the higher socioeconomic status population (Pacifica region) <sup>†</sup>**

| Departments   | Age group | Mortality rates (R) (%/year) | Not- overweight population in 2005 (Number of people) <sup>1</sup> | Overweight population in 2005 (Number of people) <sup>2</sup> | Obese population in 2005 (Number of people) <sup>3</sup> |
|---------------|-----------|------------------------------|--------------------------------------------------------------------|---------------------------------------------------------------|----------------------------------------------------------|
| Department 19 | 0-4       | 0.00309                      | 8023                                                               | 4011                                                          | 669                                                      |
|               | 5-9       | 0.00028                      | 12625                                                              | 2525                                                          | 1894                                                     |
|               | 10-14     | 0.00024                      | 12359                                                              | 2602                                                          | 650                                                      |
|               | 15-19     | 0.00181                      | 15988                                                              | 4290                                                          | 780                                                      |
|               | 20-24     | 0.00250                      | 16791                                                              | 4264                                                          | 267                                                      |
|               | 25-29     | 0.00302                      | 12214                                                              | 2748                                                          | 916                                                      |
|               | 30-34     | 0.00294                      | 5678                                                               | 4416                                                          | 631                                                      |
|               | 35-39     | 0.00275                      | 6428                                                               | 4628                                                          | 2057                                                     |
|               | 40-44     | 0.00321                      | 6412                                                               | 5855                                                          | 1115                                                     |
|               | 45-49     | 0.00387                      | 2931                                                               | 5210                                                          | 3582                                                     |
|               | 50-54     | 0.00425                      | 3056                                                               | 4232                                                          | 2586                                                     |
| Department 52 | 55-59     | 0.00776                      | 2093                                                               | 3349                                                          | 1675                                                     |
|               | 0-4       | 0.00270                      | 21147                                                              | 4614                                                          | 1153                                                     |
|               | 5-9       | 0.00015                      | 17964                                                              | 5716                                                          | 2450                                                     |
|               | 10-14     | 0.00019                      | 17781                                                              | 3704                                                          | 741                                                      |
|               | 15-19     | 0.00074                      | 23939                                                              | 4671                                                          | 1168                                                     |
|               | 20-24     | 0.00147                      | 30849                                                              | 7404                                                          | 1234                                                     |
|               | 25-29     | 0.00133                      | 14194                                                              | 10040                                                         | 1731                                                     |
|               | 30-34     | 0.00144                      | 9672                                                               | 8981                                                          | 2763                                                     |
|               | 35-39     | 0.00134                      | 7512                                                               | 14370                                                         | 1960                                                     |
|               | 40-44     | 0.00181                      | 6395                                                               | 11444                                                         | 3366                                                     |
|               | 45-49     | 0.00200                      | 4346                                                               | 8419                                                          | 7605                                                     |
| Department 76 | 50-54     | 0.00261                      | 5483                                                               | 6926                                                          | 4906                                                     |
|               | 55-59     | 0.00450                      | 2058                                                               | 4889                                                          | 5146                                                     |
|               | 0-4       | 0.00269                      | 108668                                                             | 25207                                                         | 9522                                                     |
|               | 5-9       | 0.00025                      | 133891                                                             | 29622                                                         | 17773                                                    |
|               | 10-14     | 0.00035                      | 136676                                                             | 21920                                                         | 10315                                                    |
|               | 15-19     | 0.00196                      | 144947                                                             | 35553                                                         | 5470                                                     |
|               | 20-24     | 0.00299                      | 131937                                                             | 28022                                                         | 8173                                                     |
|               | 25-29     | 0.00317                      | 94551                                                              | 44851                                                         | 16971                                                    |
|               | 30-34     | 0.00298                      | 80410                                                              | 48482                                                         | 24832                                                    |
|               | 35-39     | 0.00280                      | 64399                                                              | 65674                                                         | 28693                                                    |
|               | 40-44     | 0.00298                      | 46271                                                              | 69406                                                         | 32877                                                    |
| 45-49         | 0.00373   | 38735                        | 68724                                                              | 31863                                                         |                                                          |
| 50-54         | 0.00562   | 32052                        | 49080                                                              | 30049                                                         |                                                          |
| 55-59         | 0.00749   | 28441                        | 37289                                                              | 24017                                                         |                                                          |

<sup>†</sup>Values used in this table are for the urban population

<sup>1</sup> Initial value used in the stock of not-overweight population in 2005 for higher SES.

<sup>2</sup> Initial value used in the stock of overweight population in 2005 for higher SES.

<sup>3</sup> Initial value used in the stock of obese population in 2005 for higher SES.

## 1.5 Bogotá

### 1.5.1 Data and model parameters used

**Table 113. Prevalent rates of entire population by age group, gender, and body mass index category in 2005 (Bogotá)**

| Age Group | Nutritional State Male |           |         | Nutritional State Female |           |         |
|-----------|------------------------|-----------|---------|--------------------------|-----------|---------|
|           | Not-Overweigh          | Overweigh | Obese   | Not-Overweigh            | Overweigh | Obese   |
| 0-4       | 0.73188                | 0.21377   | 0.05435 | 0.74203                  | 0.20580   | 0.05217 |
| 5-9       | 0.82781                | 0.13245   | 0.03974 | 0.74675                  | 0.20779   | 0.04545 |
| 10-14     | 0.81197                | 0.13675   | 0.05128 | 0.82313                  | 0.16327   | 0.01361 |
| 15-19     | 0.89051                | 0.10219   | 0.00730 | 0.77340                  | 0.20197   | 0.02463 |
| 20-24     | 0.81780                | 0.14407   | 0.03814 | 0.71429                  | 0.24490   | 0.04082 |
| 25-29     | 0.67164                | 0.29851   | 0.02985 | 0.64537                  | 0.28435   | 0.07029 |
| 30-34     | 0.58599                | 0.36306   | 0.05096 | 0.54198                  | 0.32443   | 0.13359 |
| 35-39     | 0.50365                | 0.38686   | 0.10949 | 0.43798                  | 0.36822   | 0.19380 |
| 40-44     | 0.43511                | 0.44275   | 0.12214 | 0.38956                  | 0.42169   | 0.18876 |
| 45-49     | 0.35433                | 0.52756   | 0.11811 | 0.24180                  | 0.49180   | 0.26639 |
| 50-54     | 0.35000                | 0.46000   | 0.19000 | 0.22632                  | 0.43158   | 0.34211 |
| 55-59     | 0.41026                | 0.46154   | 0.12821 | 0.24800                  | 0.37600   | 0.37600 |

**Table 114. Prevalent rates of lower socioeconomic status population by age group, gender, and body mass index category in 2005 (Bogotá)**

| Age Group | Nutritional State Male |           |         | Nutritional State Female |           |         |
|-----------|------------------------|-----------|---------|--------------------------|-----------|---------|
|           | Not-Overweigh          | Overweigh | Obese   | Not-Overweigh            | Overweigh | Obese   |
| 0-4       | 0.68519                | 0.24074   | 0.07407 | 0.72727                  | 0.22727   | 0.04545 |
| 5-9       | 1.00000                | 0.00000   | 0.00000 | 0.64706                  | 0.29412   | 0.05882 |
| 10-14     | 1.00000                | 0.00000   | 0.00000 | 1.00000                  | 0.00000   | 0.00000 |
| 15-19     | 1.00000                | 0.00000   | 0.00000 | 0.76923                  | 0.23077   | 0.00000 |
| 20-24     | 0.82759                | 0.17241   | 0.00000 | 0.78846                  | 0.21154   | 0.00000 |
| 25-29     | 0.73077                | 0.23077   | 0.03846 | 0.58621                  | 0.31034   | 0.10345 |
| 30-34     | 0.46154                | 0.53846   | 0.00000 | 0.54167                  | 0.33333   | 0.12500 |
| 35-39     | 0.57143                | 0.35714   | 0.07143 | 0.41176                  | 0.38235   | 0.20588 |
| 40-44     | 0.64286                | 0.21429   | 0.14286 | 0.25000                  | 0.58333   | 0.16667 |
| 45-49     | 0.55556                | 0.44444   | 0.00000 | 0.52632                  | 0.36842   | 0.10526 |
| 50-54     | 0.58333                | 0.33333   | 0.08333 | 0.28571                  | 0.28571   | 0.42857 |
| 55-59     | 0.50000                | 0.00000   | 0.50000 | 0.50000                  | 0.50000   | 0.00000 |

**Table 115. Prevalent rates of middle socioeconomic status population by age group, gender, and body mass index category in 2005 (Bogotá)**

| Age Group | Nutritional State Male |           |         | Nutritional State Female |           |         |
|-----------|------------------------|-----------|---------|--------------------------|-----------|---------|
|           | Not-Overweigh          | Overweigh | Obese   | Not-Overweigh            | Overweigh | Obese   |
| 0-4       | 0.76623                | 0.19481   | 0.03896 | 0.72477                  | 0.22936   | 0.04587 |
| 5-9       | 0.83333                | 0.14286   | 0.02381 | 0.73529                  | 0.23529   | 0.02941 |
| 10-14     | 0.87500                | 0.12500   | 0.00000 | 0.75000                  | 0.22500   | 0.02500 |



|       |         |         |         |         |         |         |
|-------|---------|---------|---------|---------|---------|---------|
| 15-19 | 0.93333 | 0.06667 | 0.00000 | 0.64583 | 0.29167 | 0.06250 |
| 20-24 | 0.83333 | 0.11111 | 0.05556 | 0.67073 | 0.26829 | 0.06098 |
| 25-29 | 0.68182 | 0.31818 | 0.00000 | 0.60000 | 0.33684 | 0.06316 |
| 30-34 | 0.69697 | 0.30303 | 0.00000 | 0.58929 | 0.32143 | 0.08929 |
| 35-39 | 0.51852 | 0.29630 | 0.18519 | 0.42623 | 0.40984 | 0.16393 |
| 40-44 | 0.66667 | 0.29630 | 0.03704 | 0.44444 | 0.53333 | 0.02222 |
| 45-49 | 0.30769 | 0.46154 | 0.23077 | 0.22222 | 0.46667 | 0.31111 |
| 50-54 | 0.35714 | 0.50000 | 0.14286 | 0.15385 | 0.33333 | 0.51282 |
| 55-59 | 0.38462 | 0.46154 | 0.15385 | 0.36364 | 0.36364 | 0.27273 |

**Table 116. Prevalent rates of higher socioeconomic status population by age group, gender, and body mass index category in 2005 (Bogotá)**

| Age Group | Nutritional State Male |           |         | Nutritional State Female |           |         |
|-----------|------------------------|-----------|---------|--------------------------|-----------|---------|
|           | Not-Overweigh          | Overweigh | Obese   | Not-Overweigh            | Overweigh | Obese   |
| 0-4       | 0.73103                | 0.21379   | 0.05517 | 0.75882                  | 0.18235   | 0.05882 |
| 5-9       | 0.79787                | 0.14894   | 0.05319 | 0.76699                  | 0.18447   | 0.04854 |
| 10-14     | 0.75000                | 0.16667   | 0.08333 | 0.83505                  | 0.15464   | 0.01031 |
| 15-19     | 0.85870                | 0.13043   | 0.01087 | 0.81690                  | 0.16901   | 0.01408 |
| 20-24     | 0.81046                | 0.15033   | 0.03922 | 0.71292                  | 0.24402   | 0.04306 |
| 25-29     | 0.65649                | 0.30534   | 0.03817 | 0.67725                  | 0.25397   | 0.06878 |
| 30-34     | 0.56757                | 0.36036   | 0.07207 | 0.52747                  | 0.32418   | 0.14835 |
| 35-39     | 0.48958                | 0.41667   | 0.09375 | 0.44785                  | 0.34969   | 0.20245 |
| 40-44     | 0.33333                | 0.52222   | 0.14444 | 0.38542                  | 0.38542   | 0.22917 |
| 45-49     | 0.34783                | 0.55435   | 0.09783 | 0.21667                  | 0.51111   | 0.27222 |
| 50-54     | 0.31081                | 0.47297   | 0.21622 | 0.24306                  | 0.46528   | 0.29167 |
| 55-59     | 0.41270                | 0.47619   | 0.11111 | 0.21782                  | 0.37624   | 0.40594 |

**Table 117. Prevalent rates of entire population by age group, gender, and body mass index category in 2010 (Bogotá)**

| Age Group | Nutritional State Male |           |         | Nutritional State Female |           |         |
|-----------|------------------------|-----------|---------|--------------------------|-----------|---------|
|           | Not-Overweigh          | Overweigh | Obese   | Not-Overweigh            | Overweigh | Obese   |
| 0-4       | 0.69499                | 0.23747   | 0.06754 | 0.72785                  | 0.21308   | 0.05907 |
| 5-9       | 0.72990                | 0.15876   | 0.11134 | 0.74215                  | 0.20404   | 0.05381 |
| 10-14     | 0.75618                | 0.18198   | 0.06184 | 0.75388                  | 0.21705   | 0.02907 |
| 15-19     | 0.88367                | 0.10067   | 0.01566 | 0.78835                  | 0.17476   | 0.03689 |
| 20-24     | 0.79200                | 0.17333   | 0.03467 | 0.72187                  | 0.22293   | 0.05520 |
| 25-29     | 0.61538                | 0.29808   | 0.08654 | 0.61483                  | 0.29426   | 0.09091 |
| 30-34     | 0.50996                | 0.39044   | 0.09960 | 0.53598                  | 0.36228   | 0.10174 |
| 35-39     | 0.45652                | 0.43841   | 0.10507 | 0.45340                  | 0.41310   | 0.13350 |
| 40-44     | 0.41107                | 0.45455   | 0.13439 | 0.36203                  | 0.45316   | 0.18481 |
| 45-49     | 0.33929                | 0.48214   | 0.17857 | 0.30296                  | 0.46925   | 0.22779 |
| 50-54     | 0.34197                | 0.49741   | 0.16062 | 0.27640                  | 0.48447   | 0.23913 |
| 55-59     | 0.30519                | 0.47403   | 0.22078 | 0.20248                  | 0.41322   | 0.38430 |

**Table 118. Prevalent rates of lower socioeconomic status population by age group, gender, and body mass index category in 2010 (Bogotá)**

| Age Group | Nutritional State Male |           |         | Nutritional State Female |           |         |
|-----------|------------------------|-----------|---------|--------------------------|-----------|---------|
|           | Not-Overweigh          | Overweigh | Obese   | Not-Overweigh            | Overweigh | Obese   |
| 0-4       | 0.56000                | 0.32000   | 0.12000 | 0.68966                  | 0.24138   | 0.06897 |
| 5-9       | 0.77419                | 0.19355   | 0.03226 | 0.84211                  | 0.15789   | 0.00000 |
| 10-14     | 0.94444                | 0.05556   | 0.00000 | 0.87500                  | 0.12500   | 0.00000 |
| 15-19     | 0.93750                | 0.06250   | 0.00000 | 0.84211                  | 0.10526   | 0.05263 |
| 20-24     | 0.86667                | 0.13333   | 0.00000 | 0.75000                  | 0.16667   | 0.08333 |
| 25-29     | 0.62500                | 0.37500   | 0.00000 | 0.68182                  | 0.18182   | 0.13636 |
| 30-34     | 0.90000                | 0.10000   | 0.00000 | 0.45455                  | 0.45455   | 0.09091 |
| 35-39     | 0.66667                | 0.33333   | 0.00000 | 0.54545                  | 0.18182   | 0.27273 |
| 40-44     | 0.40000                | 0.20000   | 0.40000 | 0.28571                  | 0.71429   | 0.00000 |
| 45-49     | 0.50000                | 0.37500   | 0.12500 | 0.23077                  | 0.38462   | 0.38462 |
| 50-54     | 0.71429                | 0.28571   | 0.00000 | 1.00000                  | 0.00000   | 0.00000 |
| 55-59     | 0.50000                | 0.50000   | 0.00000 | 0.00000                  | 0.40000   | 0.60000 |

**Table 119. Prevalent rates of middle socioeconomic status population by age group, gender, and body mass index category in 2010 (Bogotá)**

| Age Group | Nutritional State Male |           |         | Nutritional State Female |           |         |
|-----------|------------------------|-----------|---------|--------------------------|-----------|---------|
|           | Not- Overweigh         | Overweigh | Obese   | Not-Overweigh            | Overweigh | Obese   |
| 0-4       | 0.69925                | 0.23308   | 0.06767 | 0.81746                  | 0.11905   | 0.06349 |
| 5-9       | 0.75258                | 0.11340   | 0.13402 | 0.76724                  | 0.18966   | 0.04310 |
| 10-14     | 0.81301                | 0.16260   | 0.02439 | 0.78788                  | 0.18182   | 0.03030 |
| 15-19     | 0.94203                | 0.04348   | 0.01449 | 0.75000                  | 0.24107   | 0.00893 |
| 20-24     | 0.82278                | 0.13924   | 0.03797 | 0.71963                  | 0.22430   | 0.05607 |
| 25-29     | 0.72941                | 0.20000   | 0.07059 | 0.53846                  | 0.37363   | 0.08791 |
| 30-34     | 0.57143                | 0.38776   | 0.04082 | 0.51250                  | 0.37500   | 0.11250 |
| 35-39     | 0.51923                | 0.42308   | 0.05769 | 0.48438                  | 0.34375   | 0.17188 |
| 40-44     | 0.48980                | 0.42857   | 0.08163 | 0.32394                  | 0.43662   | 0.23944 |
| 45-49     | 0.53125                | 0.34375   | 0.12500 | 0.38806                  | 0.40299   | 0.20896 |
| 50-54     | 0.36364                | 0.48485   | 0.15152 | 0.28947                  | 0.47368   | 0.23684 |
| 55-59     | 0.33333                | 0.52381   | 0.14286 | 0.21429                  | 0.21429   | 0.57143 |

**Table 120. Prevalent rates of higher socioeconomic status population by age group, gender, and body mass index category in 2010 (Bogotá)**

| Age Group | Nutritional State Male |           |         | Nutritional State Female |           |         |
|-----------|------------------------|-----------|---------|--------------------------|-----------|---------|
|           | Not-Overweigh          | Overweigh | Obese   | Not-Overweigh            | Overweigh | Obese   |
| 0-4       | 0.70432                | 0.23256   | 0.06312 | 0.69592                  | 0.24765   | 0.05643 |
| 5-9       | 0.71989                | 0.16807   | 0.11204 | 0.72669                  | 0.21222   | 0.06109 |
| 10-14     | 0.73176                | 0.19294   | 0.07529 | 0.73333                  | 0.23611   | 0.03056 |
| 15-19     | 0.87017                | 0.11326   | 0.01657 | 0.79688                  | 0.15885   | 0.04427 |
| 20-24     | 0.77936                | 0.18505   | 0.03559 | 0.72059                  | 0.22647   | 0.05294 |
| 25-29     | 0.57078                | 0.33333   | 0.09589 | 0.63279                  | 0.27869   | 0.08852 |
| 30-34     | 0.47396                | 0.40625   | 0.11979 | 0.54487                  | 0.35577   | 0.09936 |
| 35-39     | 0.43578                | 0.44495   | 0.11927 | 0.44410                  | 0.43478   | 0.12112 |
| 40-44     | 0.39196                | 0.46734   | 0.14070 | 0.37224                  | 0.45110   | 0.17666 |
| 45-49     | 0.29891                | 0.51087   | 0.19022 | 0.28969                  | 0.48468   | 0.22563 |
| 50-54     | 0.32026                | 0.50980   | 0.16993 | 0.26950                  | 0.48936   | 0.24113 |

|       |         |         |         |         |         |         |
|-------|---------|---------|---------|---------|---------|---------|
| 55-59 | 0.29771 | 0.46565 | 0.23664 | 0.20574 | 0.44019 | 0.35407 |
|-------|---------|---------|---------|---------|---------|---------|

**Table 121. Fraction of births for men by body mass index category, and socioeconomic status (Bogotá) †**

| Population group | Lower SES (%/year) | Middle SES (%/year) | Higher SES (%/year) | Complete Urban Population (%/year) |
|------------------|--------------------|---------------------|---------------------|------------------------------------|
| Not- overweight  | 50,00%             | 77,27%              | 78,57%              | 73,33%                             |
| Overweight       | 40,00%             | 13,64%              | 14,29%              | 18,33%                             |
| Obese            | 10,00%             | 9,09%               | 7,14%               | 8,33%                              |

† The fractions of births by each BMI category correspond to the prevalences by BMI category of children aged 0 to 12 months

**Table 122. Fraction of births for women by body mass index category and socioeconomic status (Bogotá) †**

| Population group | Lower SES (%/year) | Middle SES (%/year) | Higher SES (%/year) | Complete Urban Population (%/year) |
|------------------|--------------------|---------------------|---------------------|------------------------------------|
| Not- overweight  | 63,64%             | 81,25%              | 83,72%              | 80,00%                             |
| Overweight       | 18,18%             | 18,75%              | 11,63%              | 14,29%                             |
| Obese            | 18,18%             | 0,00%               | 4,65%               | 5,71%                              |

† The fractions of births by each BMI category correspond to the prevalences by BMI category of children aged 0 to 12 months

**Table 123. Mortality rates for men and population size by age group without segregate by socioeconomic status (Bogotá) †**

| Age group | Mortality rates (R) (%/year) | Not- overweight men in 2005 (Number of people)1 | Overweight men in 2005 (Number of people)2 | Obese men in 2005 (Number of people)3 |
|-----------|------------------------------|-------------------------------------------------|--------------------------------------------|---------------------------------------|
| 0-4       | 0.00307                      | 221907                                          | 64814                                      | 16478                                 |
| 5-9       | 0.00033                      | 262469                                          | 41995                                      | 12599                                 |
| 10-14     | 0.00038                      | 263573                                          | 44391                                      | 16647                                 |
| 15-19     | 0.00275                      | 273307                                          | 31363                                      | 2240                                  |
| 20-24     | 0.00451                      | 251792                                          | 44357                                      | 11742                                 |
| 25-29     | 0.00478                      | 196181                                          | 87192                                      | 8719                                  |
| 30-34     | 0.00447                      | 150111                                          | 93004                                      | 13053                                 |
| 35-39     | 0.00378                      | 123651                                          | 94978                                      | 26881                                 |
| 40-44     | 0.00398                      | 100731                                          | 102498                                     | 28275                                 |
| 45-49     | 0.00447                      | 67880                                           | 101066                                     | 22627                                 |
| 50-54     | 0.00621                      | 52065                                           | 68428                                      | 28264                                 |
| 55-59     | 0.00823                      | 47031                                           | 52910                                      | 14697                                 |

† Values used in this table are for the urban population

<sup>1</sup> Initial value used in the stock of not-overweight population in 2005.

<sup>2</sup> Initial value used in the stock of overweight population in 2005.

<sup>3</sup> Initial value used in the stock of obese population in 2005.

**Table 124. Mortality rates for women and population size by age group without segregate by socioeconomic status (Bogotá) †**

| Age group | Mortality rates (R) (%/year) | Not- overweight women in 2005 (Number of people)1 | Overweight women in 2005 (Number of people)2 | Obese women in 2005 (Number of people)3 |
|-----------|------------------------------|---------------------------------------------------|----------------------------------------------|-----------------------------------------|
| 0-4       | 0.00252                      | 215154                                            | 59672                                        | 15128                                   |
| 5-9       | 0.00019                      | 227389                                            | 63274                                        | 13841                                   |

|       |         |        |        |       |
|-------|---------|--------|--------|-------|
| 10-14 | 0.00028 | 256595 | 50895  | 4241  |
| 15-19 | 0.00059 | 231695 | 60506  | 7379  |
| 20-24 | 0.00085 | 239490 | 82111  | 13685 |
| 25-29 | 0.00095 | 205086 | 90359  | 22336 |
| 30-34 | 0.00101 | 151898 | 90925  | 37440 |
| 35-39 | 0.00132 | 120719 | 101489 | 53415 |
| 40-44 | 0.00157 | 103922 | 112493 | 50354 |
| 45-49 | 0.00235 | 54921  | 111704 | 60506 |
| 50-54 | 0.00354 | 40398  | 77037  | 61066 |
| 55-59 | 0.00526 | 34180  | 51821  | 51821 |

†Values used in this table are for the urban population

<sup>1</sup> Initial value used in the stock of not-overweight population in 2005.

<sup>2</sup> Initial value used in the stock of overweight population in 2005.

<sup>3</sup> Initial value used in the stock of obese population in 2005.

**Table 125. Man mortality rates and population size by age group for the lower socioeconomic status population (Bogotá) †**

| Age group | Mortality rates (R) (%/year) | Not- overweight men in 2005 (Number of people) <sup>1</sup> | Overweight men in 2005 (Number of people) <sup>2</sup> | Obese men in 2005 (Number of people) <sup>3</sup> |
|-----------|------------------------------|-------------------------------------------------------------|--------------------------------------------------------|---------------------------------------------------|
| 0-4       | 0.00307                      | 40646                                                       | 14281                                                  | 4394                                              |
| 5-9       | 0.00033                      | 31496                                                       | 0                                                      | 0                                                 |
| 10-14     | 0.00038                      | 36068                                                       | 0                                                      | 0                                                 |
| 15-19     | 0.00275                      | 33603                                                       | 0                                                      | 0                                                 |
| 20-24     | 0.00451                      | 31311                                                       | 6523                                                   | 0                                                 |
| 25-29     | 0.00478                      | 27611                                                       | 8719                                                   | 1453                                              |
| 30-34     | 0.00447                      | 9790                                                        | 11422                                                  | 0                                                 |
| 35-39     | 0.00378                      | 14336                                                       | 8960                                                   | 1792                                              |
| 40-44     | 0.00398                      | 15905                                                       | 5302                                                   | 3534                                              |
| 45-49     | 0.00447                      | 7542                                                        | 6034                                                   | 0                                                 |
| 50-54     | 0.00621                      | 10413                                                       | 5950                                                   | 1488                                              |
| 55-59     | 0.00823                      | 1470                                                        | 0                                                      | 1470                                              |

†Values used in this table are for the urban population

<sup>1</sup> Initial value used in the stock of not-overweight population in 2005 for lower SES.

<sup>2</sup> Initial value used in the stock of overweight population in 2005 for lower SES.

<sup>3</sup> Initial value used in the stock of obese population in 2005 for lower SES.

**Table 126. Women mortality rates and population size by age group for the lower socioeconomic status population (Bogotá) †**

| Age group | Mortality rates (R) (%/year) | Not- overweight women in 2005 (Number of people) <sup>1</sup> | Overweight women in 2005 (Number of people) <sup>2</sup> | Obese women in 2005 (Number of people) <sup>3</sup> |
|-----------|------------------------------|---------------------------------------------------------------|----------------------------------------------------------|-----------------------------------------------------|
| 0-4       | 0.00252                      | 41258                                                         | 12893                                                    | 2579                                                |
| 5-9       | 0.00019                      | 19573                                                         | 8897                                                     | 1779                                                |
| 10-14     | 0.00028                      | 34637                                                         | 0                                                        | 0                                                   |
| 15-19     | 0.00059                      | 25231                                                         | 7569                                                     | 0                                                   |
| 20-24     | 0.00085                      | 32485                                                         | 8715                                                     | 0                                                   |
| 25-29     | 0.00095                      | 24097                                                         | 12757                                                    | 4252                                                |
| 30-34     | 0.00101                      | 12570                                                         | 7735                                                     | 2901                                                |
| 35-39     | 0.00132                      | 11598                                                         | 10769                                                    | 5799                                                |
| 40-44     | 0.00157                      | 7127                                                          | 16631                                                    | 4752                                                |
| 45-49     | 0.00235                      | 8472                                                          | 5930                                                     | 1694                                                |
| 50-54     | 0.00354                      | 6120                                                          | 6120                                                     | 9180                                                |
| 55-59     | 0.00526                      | 1767                                                          | 1767                                                     | 0                                                   |

†Values used in this table are for the urban population

<sup>1</sup> Initial value used in the stock of not-overweight population in 2005 for lower SES.

<sup>2</sup> Initial value used in the stock of overweight population in 2005 for lower SES.

<sup>3</sup> Initial value used in the stock of obese population in 2005 for lower SES.

**Table 127. Man mortality rates and population size by age group for the middle socioeconomic status population (Bogotá) †**

| Age group | Mortality rates (R) (%/year) | Not- overweight men in 2005 (Number of people) <sup>1</sup> | Overweight men in 2005 (Number of people) <sup>2</sup> | Obese men in 2005 (Number of people) <sup>3</sup> |
|-----------|------------------------------|-------------------------------------------------------------|--------------------------------------------------------|---------------------------------------------------|
| 0-4       | 0.00307                      | 64814                                                       | 16478                                                  | 3296                                              |
| 5-9       | 0.00033                      | 73491                                                       | 12599                                                  | 2100                                              |
| 10-14     | 0.00038                      | 77685                                                       | 11098                                                  | 0                                                 |
| 15-19     | 0.00275                      | 62726                                                       | 4480                                                   | 0                                                 |
| 20-24     | 0.00451                      | 58708                                                       | 7828                                                   | 3914                                              |
| 25-29     | 0.00478                      | 43596                                                       | 20345                                                  | 0                                                 |
| 30-34     | 0.00447                      | 37528                                                       | 16316                                                  | 0                                                 |
| 35-39     | 0.00378                      | 25089                                                       | 14336                                                  | 8960                                              |
| 40-44     | 0.00398                      | 31810                                                       | 14138                                                  | 1767                                              |
| 45-49     | 0.00447                      | 12068                                                       | 18101                                                  | 9051                                              |
| 50-54     | 0.00621                      | 7438                                                        | 10413                                                  | 2975                                              |
| 55-59     | 0.00823                      | 7349                                                        | 8818                                                   | 2939                                              |

†Values used in this table are for the urban population

<sup>1</sup> Initial value used in the stock of not-overweight population in 2005 for middle SES.

<sup>2</sup> Initial value used in the stock of overweight population in 2005 for middle SES.

<sup>3</sup> Initial value used in the stock of obese population in 2005 for middle SES.

**Table 128. Women mortality rates and population size by age group for the middle socioeconomic status population (Bogotá) †**

| Age group | Mortality rates (R) (%/year) | Not- overweight women in 2005 (Number of people) <sup>1</sup> | Overweight women in 2005 (Number of people) <sup>2</sup> | Obese women in 2005 (Number of people) <sup>3</sup> |
|-----------|------------------------------|---------------------------------------------------------------|----------------------------------------------------------|-----------------------------------------------------|
| 0-4       | 0.00252                      | 58629                                                         | 18553                                                    | 3711                                                |
| 5-9       | 0.00019                      | 62277                                                         | 19929                                                    | 2491                                                |
| 10-14     | 0.00028                      | 63945                                                         | 19183                                                    | 2131                                                |
| 15-19     | 0.00059                      | 42368                                                         | 19134                                                    | 4100                                                |
| 20-24     | 0.00085                      | 51457                                                         | 20583                                                    | 4678                                                |
| 25-29     | 0.00095                      | 41738                                                         | 23432                                                    | 4394                                                |
| 30-34     | 0.00101                      | 34714                                                         | 18935                                                    | 5260                                                |
| 35-39     | 0.00132                      | 23153                                                         | 22262                                                    | 8905                                                |
| 40-44     | 0.00157                      | 24437                                                         | 29324                                                    | 1222                                                |
| 45-49     | 0.00235                      | 10333                                                         | 21700                                                    | 14466                                               |
| 50-54     | 0.00354                      | 3845                                                          | 8330                                                     | 12815                                               |
| 55-59     | 0.00526                      | 8353                                                          | 8353                                                     | 6265                                                |

†Values used in this table are for the urban population

<sup>1</sup> Initial value used in the stock of not-overweight population in 2005 for middle SES.

<sup>2</sup> Initial value used in the stock of overweight population in 2005 for middle SES.

<sup>3</sup> Initial value used in the stock of obese population in 2005 for middle SES.

**Table 129. Man mortality rates and population size by age group for the higher socioeconomic status population (Bogotá) †**

| Age group | Mortality rates (R) (%/year) | Not- overweight men in 2005 (Number of people) <sup>1</sup> | Overweight men in 2005 (Number of people) <sup>2</sup> | Obese men in 2005 (Number of people) <sup>3</sup> |
|-----------|------------------------------|-------------------------------------------------------------|--------------------------------------------------------|---------------------------------------------------|
|-----------|------------------------------|-------------------------------------------------------------|--------------------------------------------------------|---------------------------------------------------|

|       |         |        |       |       |
|-------|---------|--------|-------|-------|
| 0-4   | 0.00307 | 116446 | 34055 | 8788  |
| 5-9   | 0.00033 | 157482 | 29397 | 10499 |
| 10-14 | 0.00038 | 149820 | 33293 | 16647 |
| 15-19 | 0.00275 | 176977 | 26883 | 2240  |
| 20-24 | 0.00451 | 161773 | 30006 | 7828  |
| 25-29 | 0.00478 | 124975 | 58128 | 7266  |
| 30-34 | 0.00447 | 102794 | 65266 | 13053 |
| 35-39 | 0.00378 | 84226  | 71682 | 16128 |
| 40-44 | 0.00398 | 53016  | 83059 | 22974 |
| 45-49 | 0.00447 | 48270  | 76931 | 13576 |
| 50-54 | 0.00621 | 34214  | 52065 | 23801 |
| 55-59 | 0.00823 | 38213  | 44092 | 10288 |

†Values used in this table are for the urban population

<sup>1</sup> Initial value used in the stock of not-overweight population in 2005 for higher SES.

<sup>2</sup> Initial value used in the stock of overweight population in 2005 for higher SES.

<sup>3</sup> Initial value used in the stock of obese population in 2005 for higher SES.

**Table 130. Women mortality rates and population size by age group for the higher socioeconomic status population (Bogotá) †**

| Age group | Mortality rates (R) (%/year) | Not- overweight women in 2005 (Number of people) <sup>1</sup> | Overweight women in 2005 (Number of people) <sup>2</sup> | Obese women in 2005 (Number of people) <sup>3</sup> |
|-----------|------------------------------|---------------------------------------------------------------|----------------------------------------------------------|-----------------------------------------------------|
| 0-4       | 0.00252                      | 115592                                                        | 27778                                                    | 8961                                                |
| 5-9       | 0.00019                      | 145390                                                        | 34967                                                    | 9202                                                |
| 10-14     | 0.00028                      | 160192                                                        | 29665                                                    | 1978                                                |
| 15-19     | 0.00059                      | 164342                                                        | 34002                                                    | 2833                                                |
| 20-24     | 0.00085                      | 154965                                                        | 53042                                                    | 9360                                                |
| 25-29     | 0.00095                      | 140266                                                        | 52600                                                    | 14246                                               |
| 30-34     | 0.00101                      | 104517                                                        | 64235                                                    | 29396                                               |
| 35-39     | 0.00132                      | 86497                                                         | 67539                                                    | 39101                                               |
| 40-44     | 0.00157                      | 70638                                                         | 70638                                                    | 42001                                               |
| 45-49     | 0.00235                      | 35649                                                         | 84096                                                    | 44790                                               |
| 50-54     | 0.00354                      | 32105                                                         | 61459                                                    | 38526                                               |
| 55-59     | 0.00526                      | 24247                                                         | 41882                                                    | 45188                                               |

†Values used in this table are for the urban population

<sup>1</sup> Initial value used in the stock of not-overweight population in 2005 for higher SES.

<sup>2</sup> Initial value used in the stock of overweight population in 2005 for higher SES.

<sup>3</sup> Initial value used in the stock of obese population in 2005 for higher SES.

**Table 131. Data and projections of the Fertility rates (Bogotá) †**

| Year | Average Region Fecundity Rate | Year | Average Region Fecundity Rate | Year | Average Region Fecundity Rate |
|------|-------------------------------|------|-------------------------------|------|-------------------------------|
| 2005 | 1,985                         | 2014 | 1,908                         | 2023 | 1,896                         |
| 2006 | 1,968                         | 2015 | 1,907                         | 2024 | 1,894                         |
| 2007 | 1,951                         | 2016 | 1,905                         | 2025 | 1,893                         |
| 2008 | 1,934                         | 2017 | 1,904                         | 2026 | 1,891                         |
| 2009 | 1,929                         | 2018 | 1,903                         | 2027 | 1,890                         |
| 2010 | 1,924                         | 2019 | 1,901                         | 2028 | 1,889                         |
| 2011 | 1,919                         | 2020 | 1,900                         | 2029 | 1,887                         |
| 2012 | 1,914                         | 2021 | 1,898                         | 2030 | 1,886                         |
| 2013 | 1,910                         | 2022 | 1,897                         |      |                               |

† Data of Fertility rate of DANE [1] was used to forecast the fertility rate from 2005 to 2030. Holt-Winters no seasonal method in EViews 5 (Quantitative Micro Software, LLC) was used to forecast the fertility rate. In the SD model we used data from 2005 to 2030.

## 1.6 Orinoquia y Amazonia region

The Orinoquia y Amazonia region of Colombia is located in the south of the national territory and consists of eight departments, these are:

- Arauca (81)
- Casanare (85)
- Putumayo (86)
- Amazonas (91)
- Guainía (94)
- Guaviare (95)
- Vaupés (97)
- Vichada (99)

### 1.6.1 Data and model parameters used

**Table 132. Prevalent rates of entire population by age group, gender, and body mass index category in 2005 (Orinoquia y Amazonia region)**

| Age Group | Nutritional State Male |           |         | Nutritional State Female |           |         |
|-----------|------------------------|-----------|---------|--------------------------|-----------|---------|
|           | Not-Overweigh          | Overweigh | Obese   | Not-Overweigh            | Overweigh | Obese   |
| 0-4       | 0.78618                | 0.17171   | 0.04212 | 0.79330                  | 0.17207   | 0.03464 |
| 5-9       | 0.79037                | 0.15615   | 0.05348 | 0.83559                  | 0.13007   | 0.03434 |
| 10-14     | 0.81679                | 0.13959   | 0.04362 | 0.78942                  | 0.16667   | 0.04391 |
| 15-19     | 0.86639                | 0.10127   | 0.03235 | 0.75000                  | 0.20668   | 0.04332 |
| 20-24     | 0.71508                | 0.22533   | 0.05959 | 0.68852                  | 0.21816   | 0.09332 |
| 25-29     | 0.57197                | 0.33523   | 0.09280 | 0.59781                  | 0.27770   | 0.12449 |
| 30-34     | 0.42664                | 0.43341   | 0.13995 | 0.47958                  | 0.33434   | 0.18608 |
| 35-39     | 0.37275                | 0.44473   | 0.18252 | 0.34647                  | 0.40230   | 0.25123 |
| 40-44     | 0.35529                | 0.44706   | 0.19765 | 0.32513                  | 0.42004   | 0.25483 |
| 45-49     | 0.34270                | 0.43539   | 0.22191 | 0.26588                  | 0.42118   | 0.31294 |
| 50-54     | 0.33108                | 0.47635   | 0.19257 | 0.22188                  | 0.44681   | 0.33131 |
| 55-59     | 0.33333                | 0.41243   | 0.25424 | 0.24409                  | 0.37795   | 0.37795 |

**Table 133. Prevalent rates of lower socioeconomic status population by age group, gender, and body mass index category in 2005 (Orinoquia y Amazonia region)**

**Table 134. Prevalent rates of middle socioeconomic status population by age group, gender, and body mass index category in 2005 (Orinoquia y Amazonia region)**

| Age Group | Nutritional State Male |           |         | Nutritional State Female |           |         |
|-----------|------------------------|-----------|---------|--------------------------|-----------|---------|
|           | Not-Overweigh          | Overweigh | Obese   | Not-Overweigh            | Overweigh | Obese   |
| 0-4       | 0.74672                | 0.20524   | 0.04803 | 0.83920                  | 0.13568   | 0.02513 |
| 5-9       | 0.78667                | 0.15111   | 0.06222 | 0.79079                  | 0.14644   | 0.06276 |
| 10-14     | 0.76652                | 0.17181   | 0.06167 | 0.77459                  | 0.15574   | 0.06967 |
| 15-19     | 0.84242                | 0.12727   | 0.03030 | 0.74747                  | 0.20707   | 0.04545 |

| Age Group | Nutritional State Male |           |         | Nutritional State Female |           |         |
|-----------|------------------------|-----------|---------|--------------------------|-----------|---------|
|           | Not-Overweigh          | Overweigh | Obese   | Not-Overweigh            | Overweigh | Obese   |
| 0-4       | 0.81146                | 0.14972   | 0.03882 | 0.78246                  | 0.18421   | 0.03333 |
| 5-9       | 0.82648                | 0.14132   | 0.03220 | 0.87674                  | 0.10764   | 0.01563 |
| 10-14     | 0.85199                | 0.12334   | 0.02467 | 0.82011                  | 0.15344   | 0.02646 |
| 15-19     | 0.90226                | 0.07519   | 0.02256 | 0.73933                  | 0.22472   | 0.03596 |
| 20-24     | 0.76656                | 0.18612   | 0.04732 | 0.68396                  | 0.23113   | 0.08491 |
| 25-29     | 0.64639                | 0.30038   | 0.05323 | 0.54913                  | 0.30925   | 0.14162 |
| 30-34     | 0.49558                | 0.41150   | 0.09292 | 0.48882                  | 0.31949   | 0.19169 |
| 35-39     | 0.50279                | 0.37430   | 0.12291 | 0.36364                  | 0.38462   | 0.25175 |
| 40-44     | 0.49198                | 0.42246   | 0.08556 | 0.32549                  | 0.45490   | 0.21961 |
| 45-49     | 0.39752                | 0.39130   | 0.21118 | 0.28492                  | 0.45251   | 0.26257 |
| 50-54     | 0.39189                | 0.45946   | 0.14865 | 0.27660                  | 0.41844   | 0.30496 |
| 55-59     | 0.45349                | 0.40698   | 0.13953 | 0.25926                  | 0.41667   | 0.32407 |
| 20-24     | 0.63115                | 0.30328   | 0.06557 | 0.69082                  | 0.19807   | 0.11111 |
| 25-29     | 0.46429                | 0.38571   | 0.15000 | 0.61137                  | 0.28436   | 0.10427 |
| 30-34     | 0.40541                | 0.40541   | 0.18919 | 0.38503                  | 0.40107   | 0.21390 |
| 35-39     | 0.28814                | 0.52542   | 0.18644 | 0.35616                  | 0.36301   | 0.28082 |
| 40-44     | 0.34783                | 0.41739   | 0.23478 | 0.31288                  | 0.36196   | 0.32515 |
| 45-49     | 0.35106                | 0.44681   | 0.20213 | 0.23967                  | 0.40496   | 0.35537 |
| 50-54     | 0.32895                | 0.50000   | 0.17105 | 0.17391                  | 0.45652   | 0.36957 |
| 55-59     | 0.24324                | 0.45946   | 0.29730 | 0.26087                  | 0.33333   | 0.40580 |

**Table 135. Prevalent rates of higher socioeconomic status population by age group, gender, and body mass index category in 2005 (Orinoquia y Amazonia region)**

| Age Group | Nutritional State Male |           |         | Nutritional State Female |           |         |
|-----------|------------------------|-----------|---------|--------------------------|-----------|---------|
|           | Not-Overweigh          | Overweigh | Obese   | Not-Overweigh            | Overweigh | Obese   |
| 0-4       | 0.75641                | 0.19872   | 0.04487 | 0.76984                  | 0.17460   | 0.05556 |
| 5-9       | 0.66225                | 0.21854   | 0.11921 | 0.74658                  | 0.19178   | 0.06164 |
| 10-14     | 0.77301                | 0.14724   | 0.07975 | 0.71728                  | 0.21990   | 0.06283 |
| 15-19     | 0.79592                | 0.14286   | 0.06122 | 0.78182                  | 0.15758   | 0.06061 |
| 20-24     | 0.65306                | 0.25510   | 0.09184 | 0.69753                  | 0.20988   | 0.09259 |
| 25-29     | 0.53600                | 0.35200   | 0.11200 | 0.67816                  | 0.20690   | 0.11494 |
| 30-34     | 0.30189                | 0.50943   | 0.18868 | 0.57143                  | 0.28571   | 0.14286 |
| 35-39     | 0.22826                | 0.47826   | 0.29348 | 0.31073                  | 0.46328   | 0.22599 |
| 40-44     | 0.15447                | 0.51220   | 0.33333 | 0.33775                  | 0.42384   | 0.23841 |
| 45-49     | 0.24752                | 0.49505   | 0.25743 | 0.26400                  | 0.39200   | 0.34400 |
| 50-54     | 0.20833                | 0.48611   | 0.30556 | 0.18750                  | 0.47917   | 0.33333 |
| 55-59     | 0.20370                | 0.38889   | 0.40741 | 0.20779                  | 0.36364   | 0.42857 |

**Table 136. Prevalent rates of entire population by age group, gender, and body mass index category in 2010 (Orinoquia y Amazonia region)**

| Age Group | Nutritional State Male |           |         | Nutritional State Female |           |         |
|-----------|------------------------|-----------|---------|--------------------------|-----------|---------|
|           | Not-Overweigh          | Overweigh | Obese   | Not-Overweigh            | Overweigh | Obese   |
| 0-4       | 0.69989                | 0.23068   | 0.06943 | 0.76251                  | 0.19702   | 0.04047 |



|       |         |         |         |         |         |         |
|-------|---------|---------|---------|---------|---------|---------|
| 5-9   | 0.73990 | 0.18325 | 0.07685 | 0.81022 | 0.14703 | 0.04275 |
| 10-14 | 0.79958 | 0.14376 | 0.05666 | 0.76560 | 0.18904 | 0.04537 |
| 15-19 | 0.85432 | 0.11358 | 0.03210 | 0.74685 | 0.20273 | 0.05042 |
| 20-24 | 0.66436 | 0.26471 | 0.07093 | 0.64390 | 0.26308 | 0.09302 |
| 25-29 | 0.42458 | 0.43575 | 0.13966 | 0.51935 | 0.33780 | 0.14286 |
| 30-34 | 0.36640 | 0.43117 | 0.20243 | 0.41021 | 0.39868 | 0.19110 |
| 35-39 | 0.34112 | 0.48131 | 0.17757 | 0.31979 | 0.45760 | 0.22261 |
| 40-44 | 0.27569 | 0.47870 | 0.24561 | 0.28544 | 0.40613 | 0.30843 |
| 45-49 | 0.29589 | 0.44110 | 0.26301 | 0.25285 | 0.42825 | 0.31891 |
| 50-54 | 0.26374 | 0.47985 | 0.25641 | 0.22161 | 0.43767 | 0.34072 |
| 55-59 | 0.29534 | 0.45078 | 0.25389 | 0.26033 | 0.40083 | 0.33884 |

**Table 137.**

**Prevalent rates of lower socioeconomic status population by age group, gender, and body mass index category in 2010 (Orinoquia y Amazonia region)**

| Age Group | Nutritional State Male |           |         | Nutritional State Female |           |         |
|-----------|------------------------|-----------|---------|--------------------------|-----------|---------|
|           | Not-Overweigh          | Overweigh | Obese   | Not-Overweigh            | Overweigh | Obese   |
| 0-4       | 0.69618                | 0.24275   | 0.06107 | 0.74408                  | 0.21450   | 0.04142 |
| 5-9       | 0.74402                | 0.19269   | 0.06329 | 0.82132                  | 0.13213   | 0.04655 |
| 10-14     | 0.81399                | 0.13244   | 0.05357 | 0.78691                  | 0.17409   | 0.03900 |
| 15-19     | 0.86404                | 0.10555   | 0.03041 | 0.74620                  | 0.21277   | 0.04103 |
| 20-24     | 0.69388                | 0.24745   | 0.05867 | 0.61895                  | 0.28842   | 0.09263 |
| 25-29     | 0.43526                | 0.43251   | 0.13223 | 0.47381                  | 0.36667   | 0.15952 |
| 30-34     | 0.42105                | 0.41118   | 0.16776 | 0.40970                  | 0.39892   | 0.19137 |
| 35-39     | 0.41176                | 0.42647   | 0.16176 | 0.29641                  | 0.48204   | 0.22156 |
| 40-44     | 0.32189                | 0.45494   | 0.22318 | 0.26667                  | 0.41818   | 0.31515 |
| 45-49     | 0.38462                | 0.38914   | 0.22624 | 0.28745                  | 0.40081   | 0.31174 |
| 50-54     | 0.28902                | 0.47399   | 0.23699 | 0.20737                  | 0.46544   | 0.32719 |
| 55-59     | 0.31148                | 0.45082   | 0.23770 | 0.30282                  | 0.40141   | 0.29577 |

**Table 138. Prevalent rates of middle socioeconomic status population by age group, gender, and body mass index category in 2010 (Orinoquia y Amazonia region)**

| Age Group | Nutritional State Male |           |         | Nutritional State Female |           |         |
|-----------|------------------------|-----------|---------|--------------------------|-----------|---------|
|           | Not-Overweigh          | Overweigh | Obese   | Not-Overweigh            | Overweigh | Obese   |
| 0-4       | 0.69588                | 0.20619   | 0.09794 | 0.80193                  | 0.16425   | 0.03382 |
| 5-9       | 0.72174                | 0.18261   | 0.09565 | 0.77727                  | 0.19091   | 0.03182 |
| 10-14     | 0.78404                | 0.15493   | 0.06103 | 0.73600                  | 0.20400   | 0.06000 |
| 15-19     | 0.85326                | 0.10870   | 0.03804 | 0.77578                  | 0.16143   | 0.06278 |
| 20-24     | 0.60274                | 0.29452   | 0.10274 | 0.70414                  | 0.20118   | 0.09467 |
| 25-29     | 0.41304                | 0.41304   | 0.17391 | 0.60825                  | 0.29381   | 0.09794 |
| 30-34     | 0.30282                | 0.43662   | 0.26056 | 0.40341                  | 0.38636   | 0.21023 |
| 35-39     | 0.25664                | 0.54867   | 0.19469 | 0.40120                  | 0.38922   | 0.20958 |
| 40-44     | 0.24561                | 0.45614   | 0.29825 | 0.29323                  | 0.39850   | 0.30827 |
| 45-49     | 0.18557                | 0.45361   | 0.36082 | 0.20149                  | 0.44776   | 0.35075 |
| 50-54     | 0.22581                | 0.50000   | 0.27419 | 0.22105                  | 0.35789   | 0.42105 |
| 55-59     | 0.30000                | 0.42000   | 0.28000 | 0.21739                  | 0.40580   | 0.37681 |

**Table 139. Prevalent rates of higher socioeconomic status population by age group, gender, and body mass index category in 2010 (Orinoquia y Amazonia region)**

| Age Group | Nutritional State Male |           |         | Nutritional State Female |           |         |
|-----------|------------------------|-----------|---------|--------------------------|-----------|---------|
|           | Not-Overweigh          | Overweigh | Obese   | Not-Overweigh            | Overweigh | Obese   |
| 0-4       | 0.77273                | 0.15909   | 0.06818 | 0.83929                  | 0.10714   | 0.05357 |
| 5-9       | 0.75676                | 0.09459   | 0.14865 | 0.80822                  | 0.15068   | 0.04110 |
| 10-14     | 0.70588                | 0.22059   | 0.07353 | 0.67778                  | 0.26667   | 0.05556 |
| 15-19     | 0.77612                | 0.19403   | 0.02985 | 0.66197                  | 0.23944   | 0.09859 |
| 20-24     | 0.60000                | 0.32500   | 0.07500 | 0.68182                  | 0.22727   | 0.09091 |
| 25-29     | 0.36111                | 0.55556   | 0.08333 | 0.55172                  | 0.27586   | 0.17241 |
| 30-34     | 0.20833                | 0.54167   | 0.25000 | 0.43333                  | 0.43333   | 0.13333 |
| 35-39     | 0.11628                | 0.65116   | 0.23256 | 0.23077                  | 0.50769   | 0.26154 |
| 40-44     | 0.13462                | 0.63462   | 0.23077 | 0.37288                  | 0.35593   | 0.27119 |
| 45-49     | 0.10638                | 0.65957   | 0.23404 | 0.22414                  | 0.50000   | 0.27586 |
| 50-54     | 0.21053                | 0.47368   | 0.31579 | 0.28571                  | 0.46939   | 0.24490 |
| 55-59     | 0.19048                | 0.52381   | 0.28571 | 0.16129                  | 0.38710   | 0.45161 |

**Table 140. Fraction of births for men by body mass index category, and socioeconomic status (Orinoquia y Amazonia region) †**

| Population group | Lower SES (%/year) | Middle SES (%/year) | Higher SES (%/year) | Complete Urban Population (%/year) |
|------------------|--------------------|---------------------|---------------------|------------------------------------|
| Not- overweight  | 82,17%             | 82,50%              | 74,36%              | 80,77%                             |
| Overweight       | 13,95%             | 15,00%              | 20,51%              | 15,38%                             |
| Obese            | 3,88%              | 2,50%               | 5,13%               | 3,85%                              |

† The fractions of births by each BMI category correspond to the prevalences by BMI category of children aged 0 to 12 months

**Table 141. Fraction of births for women by body mass index category and socioeconomic status (Orinoquia y Amazonia region) †**

| Population group | Lower SES (%/year) | Middle SES (%/year) | Higher SES (%/year) | Complete Urban Population (%/year) |
|------------------|--------------------|---------------------|---------------------|------------------------------------|
| Not- overweight  | 82,35%             | 86,44%              | 67,74%              | 81,34%                             |
| Overweight       | 14,29%             | 13,56%              | 25,81%              | 15,79%                             |
| Obese            | 3,36%              | 0,00%               | 6,45%               | 2,87%                              |

† The fractions of births by each BMI category correspond to the prevalences by BMI category of children aged 0 to 12 months

**Table 142. Mortality rates for men and population size by age group without segregate by socioeconomic status (Orinoquia y Amazonia region) †**

| Age group | Mortality rates (R) (%/year) | Not- overweight men in 2005 (Number of people)1 | Overweight men in 2005 (Number of people)2 | Obese men in 2005 (Number of people)3 |
|-----------|------------------------------|-------------------------------------------------|--------------------------------------------|---------------------------------------|
| 0-4       | 0.00350                      | 29652                                           | 6476                                       | 1589                                  |
| 5-9       | 0.00043                      | 29523                                           | 5833                                       | 1997                                  |
| 10-14     | 0.00022                      | 30309                                           | 5180                                       | 1619                                  |
| 15-19     | 0.00174                      | 27827                                           | 3252                                       | 1039                                  |
| 20-24     | 0.00513                      | 18532                                           | 5840                                       | 1544                                  |
| 25-29     | 0.00426                      | 12877                                           | 7547                                       | 2089                                  |
| 30-34     | 0.00426                      | 8514                                            | 8649                                       | 2793                                  |
| 35-39     | 0.00307                      | 6927                                            | 8264                                       | 3392                                  |
| 40-44     | 0.00421                      | 5822                                            | 7326                                       | 3239                                  |

| Age group | Mortality rates (R) (%/year) | Not- overweight men in 2005 (Number of people) <sup>1</sup> | Overweight men in 2005 (Number of people) <sup>2</sup> | Obese men in 2005 (Number of people) <sup>3</sup> |
|-----------|------------------------------|-------------------------------------------------------------|--------------------------------------------------------|---------------------------------------------------|
| 45-49     | 0.00342                      | 4415                                                        | 5609                                                   | 2859                                              |
| 50-54     | 0.00538                      | 3202                                                        | 4606                                                   | 1862                                              |
| 55-59     | 0.00882                      | 2380                                                        | 2945                                                   | 1815                                              |

<sup>†</sup>Values used in this table are for the urban population

<sup>1</sup> Initial value used in the stock of not-overweight population in 2005.

<sup>2</sup> Initial value used in the stock of overweight population in 2005.

<sup>3</sup> Initial value used in the stock of obese population in 2005.

**Table 143. Mortality rates for women and population size by age group without segregate by socioeconomic status (Orinoquia y Amazonia region) <sup>†</sup>**

| Age group | Mortality rates (R) (%/year) | Not- overweight women in 2005 (Number of people) <sup>1</sup> | Overweight women in 2005 (Number of people) <sup>2</sup> | Obese women in 2005 (Number of people) <sup>3</sup> |
|-----------|------------------------------|---------------------------------------------------------------|----------------------------------------------------------|-----------------------------------------------------|
| 0-4       | 0.00359                      | 29193                                                         | 6332                                                     | 1275                                                |
| 5-9       | 0.00032                      | 31109                                                         | 4843                                                     | 1278                                                |
| 10-14     | 0.00043                      | 29513                                                         | 6231                                                     | 1642                                                |
| 15-19     | 0.00089                      | 25369                                                         | 6991                                                     | 1465                                                |
| 20-24     | 0.00129                      | 18722                                                         | 5932                                                     | 2537                                                |
| 25-29     | 0.00132                      | 14483                                                         | 6728                                                     | 3016                                                |
| 30-34     | 0.00175                      | 10686                                                         | 7450                                                     | 4146                                                |
| 35-39     | 0.00126                      | 7122                                                          | 8270                                                     | 5164                                                |
| 40-44     | 0.00136                      | 5725                                                          | 7396                                                     | 4487                                                |
| 45-49     | 0.00243                      | 3613                                                          | 5724                                                     | 4253                                                |
| 50-54     | 0.00472                      | 2210                                                          | 4450                                                     | 3299                                                |
| 55-59     | 0.00699                      | 1815                                                          | 2811                                                     | 2811                                                |

<sup>†</sup>Values used in this table are for the urban population

<sup>1</sup> Initial value used in the stock of not-overweight population in 2005.

<sup>2</sup> Initial value used in the stock of overweight population in 2005.

<sup>3</sup> Initial value used in the stock of obese population in 2005.

**Table 144. Man mortality rates and population size by age group for the lower socioeconomic status population (Orinoquia y Amazonia region) <sup>†</sup>**

| Age group | Mortality rates (R) (%/year) | Not- overweight men in 2005 (Number of people) <sup>1</sup> | Overweight men in 2005 (Number of people) <sup>2</sup> | Obese men in 2005 (Number of people) <sup>3</sup> |
|-----------|------------------------------|-------------------------------------------------------------|--------------------------------------------------------|---------------------------------------------------|
| 0-4       | 0.00350                      | 17881                                                       | 3299                                                   | 855                                               |
| 5-9       | 0.00043                      | 18457                                                       | 3156                                                   | 719                                               |
| 10-14     | 0.00022                      | 18169                                                       | 2630                                                   | 526                                               |
| 15-19     | 0.00174                      | 16262                                                       | 1355                                                   | 407                                               |
| 20-24     | 0.00513                      | 11727                                                       | 2847                                                   | 724                                               |
| 25-29     | 0.00426                      | 7249                                                        | 3368                                                   | 597                                               |
| 30-34     | 0.00426                      | 5045                                                        | 4189                                                   | 946                                               |
| 35-39     | 0.00307                      | 4299                                                        | 3201                                                   | 1051                                              |
| 40-44     | 0.00421                      | 3547                                                        | 3046                                                   | 617                                               |
| 45-49     | 0.00342                      | 2316                                                        | 2280                                                   | 1230                                              |
| 50-54     | 0.00538                      | 1895                                                        | 2221                                                   | 719                                               |
| 55-59     | 0.00882                      | 1573                                                        | 1412                                                   | 484                                               |

<sup>†</sup>Values used in this table are for the urban population

<sup>1</sup> Initial value used in the stock of not-overweight population in 2005 for lower SES.

<sup>2</sup> Initial value used in the stock of overweight population in 2005 for lower SES.

<sup>3</sup> Initial value used in the stock of obese population in 2005 for lower SES.

**Table 145. Women mortality rates and population size by age group for the lower socioeconomic status population (Orinoquia y Amazonia region) †**

| Age group | Mortality rates (R) (%/year) | Not- overweight women in 2005 (Number of people) <sup>1</sup> | Overweight women in 2005 (Number of people) <sup>2</sup> | Obese women in 2005 (Number of people) <sup>3</sup> |
|-----------|------------------------------|---------------------------------------------------------------|----------------------------------------------------------|-----------------------------------------------------|
| 0-4       | 0.00359                      | 16823                                                         | 3960                                                     | 717                                                 |
| 5-9       | 0.00032                      | 19515                                                         | 2396                                                     | 348                                                 |
| 10-14     | 0.00043                      | 17621                                                         | 3297                                                     | 568                                                 |
| 15-19     | 0.00089                      | 14034                                                         | 4266                                                     | 682                                                 |
| 20-24     | 0.00129                      | 10978                                                         | 3710                                                     | 1363                                                |
| 25-29     | 0.00132                      | 6627                                                          | 3732                                                     | 1709                                                |
| 30-34     | 0.00175                      | 5557                                                          | 3632                                                     | 2179                                                |
| 35-39     | 0.00126                      | 3440                                                          | 3638                                                     | 2381                                                |
| 40-44     | 0.00136                      | 2522                                                          | 3524                                                     | 1701                                                |
| 45-49     | 0.00243                      | 1751                                                          | 2781                                                     | 1614                                                |
| 50-54     | 0.00472                      | 1377                                                          | 2084                                                     | 1519                                                |
| 55-59     | 0.00699                      | 937                                                           | 1506                                                     | 1171                                                |

†Values used in this table are for the urban population

<sup>1</sup> Initial value used in the stock of not-overweight population in 2005 for lower SES.

<sup>2</sup> Initial value used in the stock of overweight population in 2005 for lower SES.

<sup>3</sup> Initial value used in the stock of obese population in 2005 for lower SES.

**Table 146. Man mortality rates and population size by age group for the middle socioeconomic status population (Orinoquia y Amazonia region) †**

| Age group | Mortality rates (R) (%/year) | Not- overweight men in 2005 (Number of people) <sup>1</sup> | Overweight men in 2005 (Number of people) <sup>2</sup> | Obese men in 2005 (Number of people) <sup>3</sup> |
|-----------|------------------------------|-------------------------------------------------------------|--------------------------------------------------------|---------------------------------------------------|
| 0-4       | 0.00350                      | 6965                                                        | 1914                                                   | 448                                               |
| 5-9       | 0.00043                      | 7071                                                        | 1358                                                   | 559                                               |
| 10-14     | 0.00022                      | 7041                                                        | 1578                                                   | 567                                               |
| 15-19     | 0.00174                      | 6279                                                        | 949                                                    | 226                                               |
| 20-24     | 0.00513                      | 3716                                                        | 1786                                                   | 386                                               |
| 25-29     | 0.00426                      | 2771                                                        | 2302                                                   | 895                                               |
| 30-34     | 0.00426                      | 2027                                                        | 2027                                                   | 946                                               |
| 35-39     | 0.00307                      | 1624                                                        | 2962                                                   | 1051                                              |
| 40-44     | 0.00421                      | 1542                                                        | 1851                                                   | 1041                                              |
| 45-49     | 0.00342                      | 1194                                                        | 1520                                                   | 688                                               |
| 50-54     | 0.00538                      | 817                                                         | 1241                                                   | 425                                               |
| 55-59     | 0.00882                      | 363                                                         | 686                                                    | 444                                               |

†Values used in this table are for the urban population

<sup>1</sup> Initial value used in the stock of not-overweight population in 2005 for middle SES.

<sup>2</sup> Initial value used in the stock of overweight population in 2005 for middle SES.

<sup>3</sup> Initial value used in the stock of obese population in 2005 for middle SES.

**Table 147. Women mortality rates and population size by age group for the middle socioeconomic status population (Orinoquia y Amazonia region) †**

| Age group | Mortality rates (R) (%/year) | Not- overweight women in 2005 (Number of people) <sup>1</sup> | Overweight women in 2005 (Number of people) <sup>2</sup> | Obese women in 2005 (Number of people) <sup>3</sup> |
|-----------|------------------------------|---------------------------------------------------------------|----------------------------------------------------------|-----------------------------------------------------|
| 0-4       | 0.00359                      | 7637                                                          | 1235                                                     | 229                                                 |
| 5-9       | 0.00032                      | 7085                                                          | 1312                                                     | 562                                                 |
| 10-14     | 0.00043                      | 7169                                                          | 1441                                                     | 645                                                 |
| 15-19     | 0.00089                      | 5867                                                          | 1625                                                     | 357                                                 |
| 20-24     | 0.00129                      | 4268                                                          | 1224                                                     | 686                                                 |

|       |         |      |      |      |
|-------|---------|------|------|------|
| 25-29 | 0.00132 | 3927 | 1827 | 670  |
| 30-34 | 0.00175 | 2150 | 2239 | 1194 |
| 35-39 | 0.00126 | 2221 | 2264 | 1751 |
| 40-44 | 0.00136 | 1491 | 1725 | 1549 |
| 45-49 | 0.00243 | 860  | 1453 | 1275 |
| 50-54 | 0.00472 | 445  | 1167 | 945  |
| 55-59 | 0.00699 | 406  | 518  | 631  |

†Values used in this table are for the urban population

1 Initial value used in the stock of not-overweight population in 2005 for middle SES.

2 Initial value used in the stock of overweight population in 2005 for middle SES.

3 Initial value used in the stock of obese population in 2005 for middle SES.

**Table 148. Man mortality rates and population size by age group for the higher socioeconomic status population (Orinoquia y Amazonia region) †**

| Age group | Mortality rates (R) (%/year) | Not- overweight men in 2005 (Number of people) <sup>1</sup> | Overweight men in 2005 (Number of people) <sup>2</sup> | Obese men in 2005 (Number of people) <sup>3</sup> |
|-----------|------------------------------|-------------------------------------------------------------|--------------------------------------------------------|---------------------------------------------------|
| 0-4       | 0.00350                      | 4806                                                        | 1263                                                   | 285                                               |
| 5-9       | 0.00043                      | 3995                                                        | 1318                                                   | 719                                               |
| 10-14     | 0.00022                      | 5099                                                        | 971                                                    | 526                                               |
| 15-19     | 0.00174                      | 5285                                                        | 949                                                    | 407                                               |
| 20-24     | 0.00513                      | 3089                                                        | 1207                                                   | 434                                               |
| 25-29     | 0.00426                      | 2857                                                        | 1876                                                   | 597                                               |
| 30-34     | 0.00426                      | 1442                                                        | 2433                                                   | 901                                               |
| 35-39     | 0.00307                      | 1003                                                        | 2102                                                   | 1290                                              |
| 40-44     | 0.00421                      | 733                                                         | 2429                                                   | 1581                                              |
| 45-49     | 0.00342                      | 905                                                         | 1809                                                   | 941                                               |
| 50-54     | 0.00538                      | 490                                                         | 1143                                                   | 719                                               |
| 55-59     | 0.00882                      | 444                                                         | 847                                                    | 887                                               |

†Values used in this table are for the urban population

<sup>1</sup> Initial value used in the stock of not-overweight population in 2005 for higher SES.

<sup>2</sup> Initial value used in the stock of overweight population in 2005 for higher SES.

<sup>3</sup> Initial value used in the stock of obese population in 2005 for higher SES.

**Table 149. Women mortality rates and population size by age group for the higher socioeconomic status population (Orinoquia y Amazonia region) †**

| Age group | Mortality rates (R) (%/year) | Not- overweight women in 2005 (Number of people) <sup>1</sup> | Overweight women in 2005 (Number of people) <sup>2</sup> | Obese women in 2005 (Number of people) <sup>3</sup> |
|-----------|------------------------------|---------------------------------------------------------------|----------------------------------------------------------|-----------------------------------------------------|
| 0-4       | 0.00359                      | 4773                                                          | 1082                                                     | 344                                                 |
| 5-9       | 0.00032                      | 4489                                                          | 1153                                                     | 371                                                 |
| 10-14     | 0.00043                      | 4767                                                          | 1461                                                     | 418                                                 |
| 15-19     | 0.00089                      | 5468                                                          | 1102                                                     | 424                                                 |
| 20-24     | 0.00129                      | 3461                                                          | 1041                                                     | 459                                                 |
| 25-29     | 0.00132                      | 3890                                                          | 1187                                                     | 659                                                 |
| 30-34     | 0.00175                      | 3047                                                          | 1523                                                     | 762                                                 |
| 35-39     | 0.00126                      | 1511                                                          | 2252                                                     | 1099                                                |
| 40-44     | 0.00136                      | 1721                                                          | 2160                                                     | 1215                                                |
| 45-49     | 0.00243                      | 1018                                                          | 1511                                                     | 1326                                                |
| 50-54     | 0.00472                      | 454                                                           | 1161                                                     | 807                                                 |
| 55-59     | 0.00699                      | 471                                                           | 825                                                      | 972                                                 |

†Values used in this table are for the urban population

<sup>1</sup> Initial value used in the stock of not-overweight population in 2005 for higher SES.

<sup>2</sup> Initial value used in the stock of overweight population in 2005 for higher SES.

<sup>3</sup> Initial value used in the stock of obese population in 2005 for higher SES.

**Table 150. Data and projections of the Fertility rates by department and Region (Orinoquia y Amazonia region)<sup>†</sup>**

| Year | Fecundity Rate Depto 81 | Fecundity Rate Depto 85 | Fecundity Rate Depto 86 | Fecundity Rate Depto 91 | Fecundity Rate Depto 94 | Fecundity Rate Depto 95 | Fecundity Rate Depto 97 | Fecundity Rate Depto 99 | Average Region Fecundity Rate |
|------|-------------------------|-------------------------|-------------------------|-------------------------|-------------------------|-------------------------|-------------------------|-------------------------|-------------------------------|
| 2005 | 4,0058                  | 3,1197                  | 3,5644                  | 4,3448                  | 4,3448                  | 4,3448                  | 4,3448                  | 4,3448                  | 4,052                         |
| 2006 | 3,9757                  | 3,0478                  | 3,4811                  | 4,2532                  | 4,2532                  | 4,2532                  | 4,2532                  | 4,2532                  | 3,971                         |
| 2007 | 3,9456                  | 2,9759                  | 3,3978                  | 4,1616                  | 4,1616                  | 4,1616                  | 4,1616                  | 4,1616                  | 3,891                         |
| 2008 | 3,9155                  | 2,904                   | 3,3145                  | 4,07                    | 4,07                    | 4,07                    | 4,07                    | 4,07                    | 3,811                         |
| 2009 | 3,862                   | 2,8585                  | 3,262                   | 3,9922                  | 3,9922                  | 3,9922                  | 3,9922                  | 3,9922                  | 3,743                         |
| 2010 | 3,8085                  | 2,813                   | 3,2095                  | 3,9144                  | 3,9144                  | 3,9144                  | 3,9144                  | 3,9144                  | 3,675                         |
| 2011 | 3,755                   | 2,7675                  | 3,157                   | 3,8366                  | 3,8366                  | 3,8366                  | 3,8366                  | 3,8366                  | 3,608                         |
| 2012 | 3,7015                  | 2,722                   | 3,1045                  | 3,7588                  | 3,7588                  | 3,7588                  | 3,7588                  | 3,7588                  | 3,540                         |
| 2013 | 3,648                   | 2,6765                  | 3,052                   | 3,681                   | 3,681                   | 3,681                   | 3,681                   | 3,681                   | 3,473                         |
| 2014 | 3,5732                  | 2,6495                  | 3,0211                  | 3,6205                  | 3,6205                  | 3,6205                  | 3,6205                  | 3,6205                  | 3,418                         |
| 2015 | 3,4984                  | 2,6225                  | 2,9902                  | 3,56                    | 3,56                    | 3,56                    | 3,56                    | 3,56                    | 3,364                         |
| 2016 | 3,4236                  | 2,5955                  | 2,9593                  | 3,4995                  | 3,4995                  | 3,4995                  | 3,4995                  | 3,4995                  | 3,309                         |
| 2017 | 3,3488                  | 2,5685                  | 2,9284                  | 3,439                   | 3,439                   | 3,439                   | 3,439                   | 3,439                   | 3,255                         |
| 2018 | 3,274                   | 2,5415                  | 2,8975                  | 3,3785                  | 3,3785                  | 3,3785                  | 3,3785                  | 3,3785                  | 3,201                         |
| 2019 | 3,1992                  | 2,5145                  | 2,8666                  | 3,318                   | 3,318                   | 3,318                   | 3,318                   | 3,318                   | 3,146                         |
| 2020 | 3,1244                  | 2,4875                  | 2,8357                  | 3,2575                  | 3,2575                  | 3,2575                  | 3,2575                  | 3,2575                  | 3,092                         |
| 2021 | 3,0496                  | 2,4605                  | 2,8048                  | 3,197                   | 3,197                   | 3,197                   | 3,197                   | 3,197                   | 3,037                         |
| 2022 | 2,9748                  | 2,4335                  | 2,7739                  | 3,1365                  | 3,1365                  | 3,1365                  | 3,1365                  | 3,1365                  | 2,983                         |
| 2023 | 2,9                     | 2,4065                  | 2,743                   | 3,076                   | 3,076                   | 3,076                   | 3,076                   | 3,076                   | 2,929                         |
| 2024 | 2,8252                  | 2,3795                  | 2,7121                  | 3,0155                  | 3,0155                  | 3,0155                  | 3,0155                  | 3,0155                  | 2,874                         |
| 2025 | 2,7504                  | 2,3525                  | 2,6812                  | 2,955                   | 2,955                   | 2,955                   | 2,955                   | 2,955                   | 2,820                         |
| 2026 | 2,6756                  | 2,3255                  | 2,6503                  | 2,8945                  | 2,8945                  | 2,8945                  | 2,8945                  | 2,8945                  | 2,765                         |
| 2027 | 2,6008                  | 2,2985                  | 2,6194                  | 2,834                   | 2,834                   | 2,834                   | 2,834                   | 2,834                   | 2,711                         |
| 2028 | 2,526                   | 2,2715                  | 2,5885                  | 2,7735                  | 2,7735                  | 2,7735                  | 2,7735                  | 2,7735                  | 2,657                         |
| 2029 | 2,4512                  | 2,2445                  | 2,5576                  | 2,713                   | 2,713                   | 2,713                   | 2,713                   | 2,713                   | 2,602                         |
| 2030 | 2,3764                  | 2,2175                  | 2,5267                  | 2,6525                  | 2,6525                  | 2,6525                  | 2,6525                  | 2,6525                  | 2,548                         |

<sup>†</sup> Data of Fertility rate of DANE [1] was used to forecast the department's fertility rate from 2005 to 2030. Holt-Winters no seasonal method in EViews 5 (Quantitative Micro Software, LLC) was used to forecast the fertility rate. In the SD model we used data from 2005 to 2030 and the region fertility rate was calculated as the average of all departments' fertility rates.

**Table 151. Fraction of births by departments, body mass index category, and socioeconomic status (Orinoquia y Amazonia region)<sup>†</sup>**

| Population group |                 | Lower SES<br>(%/year) | Middle SES<br>(%/year) | Higher SES<br>(%/year) | Complete Urban<br>Population<br>(%/year) |
|------------------|-----------------|-----------------------|------------------------|------------------------|------------------------------------------|
| Department<br>81 | Not- overweight | 75,00%                | 75,00%                 | 88,89%                 | 79,63%                                   |
|                  | Overweight      | 25,00%                | 25,00%                 | 11,11%                 | 20,37%                                   |
|                  | Obese           | 0,00%                 | 0,00%                  | 0,00%                  | 0,00%                                    |
| Department<br>85 | Not- overweight | 68,75%                | 95,24%                 | 71,43%                 | 80,39%                                   |
|                  | Overweight      | 25,00%                | 0,00%                  | 21,43%                 | 13,73%                                   |
|                  | Obese           | 6,25%                 | 4,76%                  | 7,14%                  | 5,88%                                    |
| Department<br>86 | Not- overweight | 90,91%                | 94,44%                 | 35,71%                 | 74,42%                                   |
|                  | Overweight      | 0,00%                 | 5,56%                  | 57,14%                 | 20,93%                                   |
|                  | Obese           | 9,09%                 | 0,00%                  | 7,14%                  | 4,65%                                    |
| Department<br>91 | Not- overweight | 90,70%                | 88,24%                 | 81,82%                 | 88,73%                                   |
|                  | Overweight      | 9,30%                 | 11,76%                 | 9,09%                  | 9,86%                                    |
|                  | Obese           | 0,00%                 | 0,00%                  | 9,09%                  | 1,41%                                    |
| Department<br>94 | Not- overweight | 78,95%                | 72,73%                 | 66,67%                 | 76,36%                                   |
|                  | Overweight      | 10,53%                | 27,27%                 | 33,33%                 | 16,36%                                   |
|                  | Obese           | 10,53%                | 0,00%                  | 0,00%                  | 7,27%                                    |
| Department<br>95 | Not- overweight | 88,89%                | 92,86%                 | 80,00%                 | 89,09%                                   |
|                  | Overweight      | 11,11%                | 7,14%                  | 0,00%                  | 9,09%                                    |
|                  | Obese           | 0,00%                 | 0,00%                  | 20,00%                 | 1,82%                                    |
| Department<br>97 | Not- overweight | 79,31%                | 66,67%                 | 100,00%                | 79,03%                                   |
|                  | Overweight      | 17,24%                | 33,33%                 | 0,00%                  | 17,74%                                   |
|                  | Obese           | 3,45%                 | 0,00%                  | 0,00%                  | 3,23%                                    |
| Department<br>99 | Not- overweight | 76,19%                | 50,00%                 | 100,00%                | 76,00%                                   |
|                  | Overweight      | 19,05%                | 50,00%                 | 0,00%                  | 20,00%                                   |
|                  | Obese           | 4,76%                 | 0,00%                  | 0,00%                  | 4,00%                                    |

† The fractions of births by each BMI category correspond to the prevalences by BMI category of children aged 0 to 12 months

**Table 152. Prevalent rates of entire population by age group, and body mass index category (Orinoquia y Amazonia region)**

| Departments      | Age group | Not- overweight<br>in 2005 | Overweight<br>in 2005 | Obese in<br>2005 | Not- overweight<br>in 2010 | Overweight<br>in 2010 | Obese in<br>2010 |
|------------------|-----------|----------------------------|-----------------------|------------------|----------------------------|-----------------------|------------------|
| Department<br>81 | 0-4       | 0.76991                    | 0.21239               | 0.01770          | 0.75099                    | 0.18577               | 0.06324          |
|                  | 5-9       | 0.82266                    | 0.13793               | 0.03941          | 0.82313                    | 0.12245               | 0.05442          |
|                  | 10-14     | 0.80711                    | 0.13706               | 0.05584          | 0.79110                    | 0.16438               | 0.04452          |
|                  | 15-19     | 0.77714                    | 0.17143               | 0.05143          | 0.78295                    | 0.14729               | 0.06977          |
|                  | 20-24     | 0.73864                    | 0.18750               | 0.07386          | 0.66667                    | 0.20000               | 0.13333          |
|                  | 25-29     | 0.54651                    | 0.31977               | 0.13372          | 0.47929                    | 0.38462               | 0.13609          |
|                  | 30-34     | 0.44138                    | 0.38621               | 0.17241          | 0.37278                    | 0.41420               | 0.21302          |
|                  | 35-39     | 0.37226                    | 0.37956               | 0.24818          | 0.37821                    | 0.40385               | 0.21795          |
|                  | 40-44     | 0.27737                    | 0.40146               | 0.32117          | 0.31325                    | 0.47590               | 0.21084          |
|                  | 45-49     | 0.25714                    | 0.46667               | 0.27619          | 0.28571                    | 0.43651               | 0.27778          |
|                  | 50-54     | 0.24675                    | 0.44156               | 0.31169          | 0.30108                    | 0.37634               | 0.32258          |
| 55-59            | 0.28571   | 0.30612                    | 0.40816               | 0.30357          | 0.32143                    | 0.37500               |                  |
| Department<br>85 | 0-4       | 0.80447                    | 0.16760               | 0.02793          | 0.80370                    | 0.16296               | 0.03333          |
|                  | 5-9       | 0.84848                    | 0.10909               | 0.04242          | 0.80259                    | 0.13916               | 0.05825          |
|                  | 10-14     | 0.82353                    | 0.14379               | 0.03268          | 0.79538                    | 0.15842               | 0.04620          |
|                  | 15-19     | 0.81250                    | 0.16250               | 0.02500          | 0.81423                    | 0.15020               | 0.03557          |
|                  | 20-24     | 0.74725                    | 0.19231               | 0.06044          | 0.69849                    | 0.23116               | 0.07035          |
|                  | 25-29     | 0.60920                    | 0.28161               | 0.10920          | 0.50962                    | 0.34135               | 0.14904          |
|                  | 30-34     | 0.54867                    | 0.33628               | 0.11504          | 0.35870                    | 0.42391               | 0.21739          |
| 35-39            | 0.28846   | 0.55769                    | 0.15385               | 0.28804          | 0.50000                    | 0.21196               |                  |

| Departments   | Age group     | Not- overweight in 2005 | Overweight in 2005 | Obese in 2005 | Not- overweight in 2010 | Overweight in 2010 | Obese in 2010 |
|---------------|---------------|-------------------------|--------------------|---------------|-------------------------|--------------------|---------------|
|               | 40-44         | 0.28889                 | 0.38889            | 0.32222       | 0.31034                 | 0.38621            | 0.30345       |
|               | 45-49         | 0.27273                 | 0.50649            | 0.22078       | 0.21488                 | 0.54545            | 0.23967       |
|               | 50-54         | 0.24615                 | 0.50769            | 0.24615       | 0.23077                 | 0.45192            | 0.31731       |
|               | 55-59         | 0.24444                 | 0.40000            | 0.35556       | 0.19118                 | 0.47059            | 0.33824       |
| Department 86 | 0-4           | 0.78788                 | 0.16667            | 0.04545       | 0.76923                 | 0.18750            | 0.04327       |
|               | 5-9           | 0.75862                 | 0.18966            | 0.05172       | 0.80451                 | 0.12782            | 0.06767       |
|               | 10-14         | 0.79630                 | 0.12963            | 0.07407       | 0.83122                 | 0.15190            | 0.01688       |
|               | 15-19         | 0.68889                 | 0.15556            | 0.15556       | 0.83505                 | 0.11340            | 0.05155       |
|               | 20-24         | 0.73333                 | 0.11111            | 0.15556       | 0.66851                 | 0.27624            | 0.05525       |
|               | 25-29         | 0.59091                 | 0.34091            | 0.06818       | 0.54211                 | 0.35263            | 0.10526       |
|               | 30-34         | 0.43590                 | 0.48718            | 0.07692       | 0.43151                 | 0.41781            | 0.15068       |
|               | 35-39         | 0.44828                 | 0.41379            | 0.13793       | 0.39831                 | 0.43220            | 0.16949       |
|               | 40-44         | 0.33333                 | 0.50000            | 0.16667       | 0.37190                 | 0.39669            | 0.23140       |
|               | 45-49         | 0.36842                 | 0.42105            | 0.21053       | 0.25275                 | 0.48352            | 0.26374       |
|               | 50-54         | 0.33333                 | 0.46667            | 0.20000       | 0.25806                 | 0.51613            | 0.22581       |
|               | 55-59         | 0.00000                 | 0.33333            | 0.66667       | 0.26415                 | 0.50943            | 0.22642       |
|               | Department 91 | 0-4                     | 0.80556            | 0.14931       | 0.04514                 | 0.75000            | 0.21000       |
| 5-9           |               | 0.80756                 | 0.16151            | 0.03093       | 0.81385                 | 0.14286            | 0.04329       |
| 10-14         |               | 0.75986                 | 0.18638            | 0.05376       | 0.75000                 | 0.15761            | 0.09239       |
| 15-19         |               | 0.81356                 | 0.13983            | 0.04661       | 0.82051                 | 0.15897            | 0.02051       |
| 20-24         |               | 0.65700                 | 0.24638            | 0.09662       | 0.61146                 | 0.29936            | 0.08917       |
| 25-29         |               | 0.50955                 | 0.32484            | 0.16561       | 0.45185                 | 0.41481            | 0.13333       |
| 30-34         |               | 0.38462                 | 0.38462            | 0.23077       | 0.40580                 | 0.39855            | 0.19565       |
| 35-39         |               | 0.33846                 | 0.40000            | 0.26154       | 0.37255                 | 0.46078            | 0.16667       |
| 40-44         |               | 0.30882                 | 0.47059            | 0.22059       | 0.32000                 | 0.45000            | 0.23000       |
| 45-49         |               | 0.23232                 | 0.41414            | 0.35354       | 0.11905                 | 0.52381            | 0.35714       |
| 50-54         |               | 0.20879                 | 0.49451            | 0.29670       | 0.21333                 | 0.42667            | 0.36000       |
| 55-59         |               | 0.33784                 | 0.35135            | 0.31081       | 0.27451                 | 0.43137            | 0.29412       |
| Department 94 |               | 0-4                     | 0.79741            | 0.15948       | 0.04310                 | 0.74089            | 0.21457       |
|               | 5-9           | 0.73333                 | 0.18333            | 0.08333       | 0.71233                 | 0.20548            | 0.08219       |
|               | 10-14         | 0.79389                 | 0.17939            | 0.02672       | 0.74060                 | 0.16541            | 0.09398       |
|               | 15-19         | 0.78421                 | 0.18421            | 0.03158       | 0.72772                 | 0.22277            | 0.04950       |
|               | 20-24         | 0.63190                 | 0.26994            | 0.09816       | 0.60563                 | 0.30282            | 0.09155       |
|               | 25-29         | 0.56098                 | 0.34146            | 0.09756       | 0.37975                 | 0.41139            | 0.20886       |
|               | 30-34         | 0.52414                 | 0.33793            | 0.13793       | 0.35417                 | 0.43750            | 0.20833       |
|               | 35-39         | 0.40940                 | 0.39597            | 0.19463       | 0.32258                 | 0.41935            | 0.25806       |
|               | 40-44         | 0.36029                 | 0.46324            | 0.17647       | 0.20690                 | 0.44828            | 0.34483       |
|               | 45-49         | 0.35238                 | 0.36190            | 0.28571       | 0.30526                 | 0.35789            | 0.33684       |
|               | 50-54         | 0.28395                 | 0.54321            | 0.17284       | 0.19540                 | 0.49425            | 0.31034       |
|               | 55-59         | 0.36620                 | 0.42254            | 0.21127       | 0.30303                 | 0.42424            | 0.27273       |
|               | Department 95 | 0-4                     | 0.76494            | 0.19522       | 0.03984                 | 0.66667            | 0.25490       |
| 5-9           |               | 0.82869                 | 0.15139            | 0.01992       | 0.71498                 | 0.17391            | 0.11111       |
| 10-14         |               | 0.85294                 | 0.13725            | 0.00980       | 0.78889                 | 0.16667            | 0.04444       |
| 15-19         |               | 0.83186                 | 0.15044            | 0.01770       | 0.79574                 | 0.14894            | 0.05532       |
| 20-24         |               | 0.75325                 | 0.21429            | 0.03247       | 0.63309                 | 0.26619            | 0.10072       |



| Departments   | Age group | Not- overweight in 2005 | Overweight in 2005 | Obese in 2005 | Not- overweight in 2010 | Overweight in 2010 | Obese in 2010 |
|---------------|-----------|-------------------------|--------------------|---------------|-------------------------|--------------------|---------------|
|               | 25-29     | 0.66667                 | 0.29167            | 0.04167       | 0.45370                 | 0.38889            | 0.15741       |
|               | 30-34     | 0.42063                 | 0.42063            | 0.15873       | 0.35238                 | 0.40000            | 0.24762       |
|               | 35-39     | 0.46364                 | 0.40000            | 0.13636       | 0.27586                 | 0.50000            | 0.22414       |
|               | 40-44     | 0.48529                 | 0.41912            | 0.09559       | 0.14151                 | 0.43396            | 0.42453       |
|               | 45-49     | 0.39252                 | 0.42991            | 0.17757       | 0.31731                 | 0.31731            | 0.36538       |
|               | 50-54     | 0.35065                 | 0.51948            | 0.12987       | 0.15584                 | 0.41558            | 0.42857       |
|               | 55-59     | 0.41176                 | 0.39216            | 0.19608       | 0.26415                 | 0.35849            | 0.37736       |
| Department 97 | 0-4       | 0.76494                 | 0.19522            | 0.03984       | 0.48792                 | 0.40097            | 0.11111       |
|               | 5-9       | 0.82869                 | 0.15139            | 0.01992       | 0.71186                 | 0.25000            | 0.03814       |
|               | 10-14     | 0.85294                 | 0.13725            | 0.00980       | 0.78070                 | 0.20614            | 0.01316       |
|               | 15-19     | 0.83186                 | 0.15044            | 0.01770       | 0.78922                 | 0.20588            | 0.00490       |
|               | 20-24     | 0.75325                 | 0.21429            | 0.03247       | 0.72951                 | 0.21311            | 0.05738       |
|               | 25-29     | 0.66667                 | 0.29167            | 0.04167       | 0.49495                 | 0.39394            | 0.11111       |
|               | 30-34     | 0.42063                 | 0.42063            | 0.15873       | 0.45652                 | 0.40217            | 0.14130       |
|               | 35-39     | 0.46364                 | 0.40000            | 0.13636       | 0.33750                 | 0.50000            | 0.16250       |
|               | 40-44     | 0.48529                 | 0.41912            | 0.09559       | 0.28169                 | 0.52113            | 0.19718       |
|               | 45-49     | 0.39252                 | 0.42991            | 0.17757       | 0.37500                 | 0.41250            | 0.21250       |
|               | 50-54     | 0.35065                 | 0.51948            | 0.12987       | 0.29487                 | 0.50000            | 0.20513       |
|               | 55-59     | 0.41176                 | 0.39216            | 0.19608       | 0.26316                 | 0.44737            | 0.28947       |
| Department 99 | 0-4       | 0.76699                 | 0.19417            | 0.03883       | 0.83951                 | 0.12757            | 0.03292       |
|               | 5-9       | 0.84064                 | 0.12351            | 0.03586       | 0.77358                 | 0.19340            | 0.03302       |
|               | 10-14     | 0.80349                 | 0.14847            | 0.04803       | 0.76623                 | 0.17316            | 0.06061       |
|               | 15-19     | 0.79888                 | 0.13408            | 0.06704       | 0.80543                 | 0.15385            | 0.04072       |
|               | 20-24     | 0.73077                 | 0.19231            | 0.07692       | 0.60274                 | 0.33562            | 0.06164       |
|               | 25-29     | 0.57554                 | 0.30216            | 0.12230       | 0.47887                 | 0.39437            | 0.12676       |
|               | 30-34     | 0.45455                 | 0.37121            | 0.17424       | 0.42276                 | 0.39837            | 0.17886       |
|               | 35-39     | 0.33043                 | 0.40000            | 0.26957       | 0.27193                 | 0.54386            | 0.18421       |
|               | 40-44     | 0.28846                 | 0.38462            | 0.32692       | 0.27083                 | 0.41667            | 0.31250       |
|               | 45-49     | 0.29000                 | 0.42000            | 0.29000       | 0.31068                 | 0.38835            | 0.30097       |
|               | 50-54     | 0.34118                 | 0.36471            | 0.29412       | 0.27586                 | 0.50000            | 0.22414       |
|               | 55-59     | 0.16279                 | 0.62791            | 0.20930       | 0.36000                 | 0.42000            | 0.22000       |

**Table 153. Prevalent rates of lower socioeconomic status population by age group, and body mass index category (Orinoquia y Amazonia region)**

| Departments   | Age group | Not- overweight in 2005 | Overweight in 2005 | Obese in 2005 | Not- overweight in 2010 | Overweight in 2010 | Obese in 2010 |
|---------------|-----------|-------------------------|--------------------|---------------|-------------------------|--------------------|---------------|
| Department 81 | 0-4       | 0.74684                 | 0.25316            | 0.00000       | 0.74576                 | 0.20339            | 0.05085       |
|               | 5-9       | 0.89706                 | 0.08824            | 0.01471       | 0.87591                 | 0.09489            | 0.02920       |
|               | 10-14     | 0.83871                 | 0.14516            | 0.01613       | 0.88034                 | 0.07692            | 0.04274       |
|               | 15-19     | 0.82692                 | 0.17308            | 0.00000       | 0.79000                 | 0.12000            | 0.09000       |
|               | 20-24     | 0.79032                 | 0.11290            | 0.09677       | 0.75362                 | 0.10145            | 0.14493       |
|               | 25-29     | 0.65116                 | 0.23256            | 0.11628       | 0.50704                 | 0.38028            | 0.11268       |
|               | 30-34     | 0.56757                 | 0.32432            | 0.10811       | 0.42857                 | 0.39286            | 0.17857       |
|               | 35-39     | 0.51515                 | 0.24242            | 0.24242       | 0.42553                 | 0.27660            | 0.29787       |

| Departments   | Age group     | Not- overweight in 2005 | Overweight in 2005 | Obese in 2005 | Not- overweight in 2010 | Overweight in 2010 | Obese in 2010 |
|---------------|---------------|-------------------------|--------------------|---------------|-------------------------|--------------------|---------------|
|               | 40-44         | 0.34211                 | 0.52632            | 0.13158       | 0.40299                 | 0.38806            | 0.20896       |
|               | 45-49         | 0.50000                 | 0.25000            | 0.25000       | 0.43243                 | 0.37838            | 0.18919       |
|               | 50-54         | 0.20000                 | 0.50000            | 0.30000       | 0.35714                 | 0.35714            | 0.28571       |
|               | 55-59         | 0.42857                 | 0.28571            | 0.28571       | 0.43750                 | 0.25000            | 0.31250       |
| Department 85 | 0-4           | 0.77778                 | 0.20635            | 0.01587       | 0.80822                 | 0.17808            | 0.01370       |
|               | 5-9           | 0.95122                 | 0.04878            | 0.00000       | 0.85366                 | 0.10976            | 0.03659       |
|               | 10-14         | 0.86111                 | 0.13889            | 0.00000       | 0.89189                 | 0.08108            | 0.02703       |
|               | 15-19         | 0.78261                 | 0.17391            | 0.04348       | 0.87037                 | 0.12963            | 0.00000       |
|               | 20-24         | 0.75000                 | 0.20000            | 0.05000       | 0.71667                 | 0.25000            | 0.03333       |
|               | 25-29         | 0.77273                 | 0.13636            | 0.09091       | 0.51020                 | 0.36735            | 0.12245       |
|               | 30-34         | 0.51724                 | 0.34483            | 0.13793       | 0.33333                 | 0.41667            | 0.25000       |
|               | 35-39         | 0.39130                 | 0.47826            | 0.13043       | 0.38095                 | 0.50000            | 0.11905       |
|               | 40-44         | 0.36364                 | 0.45455            | 0.18182       | 0.40741                 | 0.40741            | 0.18519       |
|               | 45-49         | 0.50000                 | 0.50000            | 0.00000       | 0.50000                 | 0.37500            | 0.12500       |
|               | 50-54         | 0.33333                 | 0.40000            | 0.26667       | 0.21053                 | 0.47368            | 0.31579       |
|               | 55-59         | 0.33333                 | 0.33333            | 0.33333       | 0.18182                 | 0.45455            | 0.36364       |
|               | Department 86 | 0-4                     | 0.78788            | 0.16667       | 0.04545                 | 0.78125            | 0.18750       |
| 5-9           |               | 0.75862                 | 0.18966            | 0.05172       | 0.81818                 | 0.12121            | 0.06061       |
| 10-14         |               | 0.79630                 | 0.12963            | 0.07407       | 0.86667                 | 0.12000            | 0.01333       |
| 15-19         |               | 0.68889                 | 0.15556            | 0.15556       | 0.84685                 | 0.11712            | 0.03604       |
| 20-24         |               | 0.73333                 | 0.11111            | 0.15556       | 0.67593                 | 0.26852            | 0.05556       |
| 25-29         |               | 0.59091                 | 0.34091            | 0.06818       | 0.49505                 | 0.37624            | 0.12871       |
| 30-34         |               | 0.43590                 | 0.48718            | 0.07692       | 0.48684                 | 0.40789            | 0.10526       |
| 35-39         |               | 0.44828                 | 0.41379            | 0.13793       | 0.48438                 | 0.37500            | 0.14063       |
| 40-44         |               | 0.33333                 | 0.50000            | 0.16667       | 0.42105                 | 0.28070            | 0.29825       |
| 45-49         |               | 0.36842                 | 0.42105            | 0.21053       | 0.22500                 | 0.47500            | 0.30000       |
| 50-54         |               | 0.33333                 | 0.46667            | 0.20000       | 0.25806                 | 0.54839            | 0.19355       |
| 55-59         |               | 0.00000                 | 0.33333            | 0.66667       | 0.26667                 | 0.50000            | 0.23333       |
| Department 91 |               | 0-4                     | 0.76748            | 0.19187       | 0.04065                 | 0.73006            | 0.23313       |
|               | 5-9           | 0.85308                 | 0.09005            | 0.05687       | 0.85789                 | 0.10526            | 0.03684       |
|               | 10-14         | 0.82573                 | 0.13278            | 0.04149       | 0.76119                 | 0.15672            | 0.08209       |
|               | 15-19         | 0.87772                 | 0.10326            | 0.01902       | 0.83784                 | 0.14865            | 0.01351       |
|               | 20-24         | 0.78268                 | 0.16469            | 0.05263       | 0.57600                 | 0.36000            | 0.06400       |
|               | 25-29         | 0.61024                 | 0.27394            | 0.11581       | 0.44554                 | 0.40594            | 0.14851       |
|               | 30-34         | 0.52577                 | 0.32216            | 0.15206       | 0.44211                 | 0.40000            | 0.15789       |
|               | 35-39         | 0.50535                 | 0.35027            | 0.14439       | 0.38889                 | 0.47222            | 0.13889       |
|               | 40-44         | 0.42781                 | 0.37968            | 0.19251       | 0.32000                 | 0.46667            | 0.21333       |
|               | 45-49         | 0.39308                 | 0.39623            | 0.21069       | 0.13043                 | 0.56522            | 0.30435       |
|               | 50-54         | 0.37638                 | 0.36162            | 0.26199       | 0.30952                 | 0.35714            | 0.33333       |
|               | 55-59         | 0.37879                 | 0.41919            | 0.20202       | 0.32258                 | 0.41935            | 0.25806       |
|               | Department 94 | 0-4                     | 0.76748            | 0.19187       | 0.04065                 | 0.69231            | 0.30769       |
| 5-9           |               | 0.85308                 | 0.09005            | 0.05687       | 0.66667                 | 0.22222            | 0.11111       |
| 10-14         |               | 0.82573                 | 0.13278            | 0.04149       | 0.52174                 | 0.26087            | 0.21739       |
| 15-19         |               | 0.87772                 | 0.10326            | 0.01902       | 0.76923                 | 0.23077            | 0.00000       |
| 20-24         |               | 0.78268                 | 0.16469            | 0.05263       | 0.37500                 | 0.50000            | 0.12500       |

| Departments              | Age group | Not- overweight<br>in 2005 | Overweight<br>in 2005 | Obese in<br>2005 | Not- overweight<br>in 2010 | Overweight<br>in 2010 | Obese in<br>2010 |
|--------------------------|-----------|----------------------------|-----------------------|------------------|----------------------------|-----------------------|------------------|
|                          | 25-29     | 0.61024                    | 0.27394               | 0.11581          | 0.50000                    | 0.40000               | 0.10000          |
|                          | 30-34     | 0.52577                    | 0.32216               | 0.15206          | 0.46667                    | 0.26667               | 0.26667          |
|                          | 35-39     | 0.50535                    | 0.35027               | 0.14439          | 0.26316                    | 0.57895               | 0.15789          |
|                          | 40-44     | 0.42781                    | 0.37968               | 0.19251          | 0.25000                    | 0.43750               | 0.31250          |
|                          | 45-49     | 0.39308                    | 0.39623               | 0.21069          | 0.08333                    | 0.25000               | 0.66667          |
|                          | 50-54     | 0.37638                    | 0.36162               | 0.26199          | 0.27273                    | 0.27273               | 0.45455          |
|                          | 55-59     | 0.37879                    | 0.41919               | 0.20202          | 0.30000                    | 0.30000               | 0.40000          |
| <b>Department<br/>95</b> | 0-4       | 0.76748                    | 0.19187               | 0.04065          | 0.68681                    | 0.24725               | 0.06593          |
|                          | 5-9       | 0.85308                    | 0.09005               | 0.05687          | 0.71345                    | 0.16959               | 0.11696          |
|                          | 10-14     | 0.82573                    | 0.13278               | 0.04149          | 0.79237                    | 0.17373               | 0.03390          |
|                          | 15-19     | 0.87772                    | 0.10326               | 0.01902          | 0.80303                    | 0.15152               | 0.04545          |
|                          | 20-24     | 0.78268                    | 0.16469               | 0.05263          | 0.62609                    | 0.26087               | 0.11304          |
|                          | 25-29     | 0.61024                    | 0.27394               | 0.11581          | 0.44681                    | 0.39362               | 0.15957          |
|                          | 30-34     | 0.52577                    | 0.32216               | 0.15206          | 0.37079                    | 0.35955               | 0.26966          |
|                          | 35-39     | 0.50535                    | 0.35027               | 0.14439          | 0.28000                    | 0.51000               | 0.21000          |
|                          | 40-44     | 0.42781                    | 0.37968               | 0.19251          | 0.15000                    | 0.43750               | 0.41250          |
|                          | 45-49     | 0.39308                    | 0.39623               | 0.21069          | 0.36364                    | 0.29870               | 0.33766          |
|                          | 50-54     | 0.37638                    | 0.36162               | 0.26199          | 0.14286                    | 0.39683               | 0.46032          |
|                          | 55-59     | 0.37879                    | 0.41919               | 0.20202          | 0.29268                    | 0.34146               | 0.36585          |
| <b>Department<br/>97</b> | 0-4       | 0.76793                    | 0.18987               | 0.04219          | 0.49000                    | 0.40500               | 0.10500          |
|                          | 5-9       | 0.83043                    | 0.15217               | 0.01739          | 0.71739                    | 0.24348               | 0.03913          |
|                          | 10-14     | 0.86347                    | 0.12915               | 0.00738          | 0.78995                    | 0.19635               | 0.01370          |
|                          | 15-19     | 0.84264                    | 0.13706               | 0.02030          | 0.79000                    | 0.20500               | 0.00500          |
|                          | 20-24     | 0.76471                    | 0.20588               | 0.02941          | 0.73109                    | 0.21008               | 0.05882          |
|                          | 25-29     | 0.64894                    | 0.29787               | 0.05319          | 0.49451                    | 0.38462               | 0.12088          |
|                          | 30-34     | 0.44898                    | 0.38776               | 0.16327          | 0.46914                    | 0.40741               | 0.12346          |
|                          | 35-39     | 0.46237                    | 0.39785               | 0.13978          | 0.33784                    | 0.50000               | 0.16216          |
|                          | 40-44     | 0.50000                    | 0.41667               | 0.08333          | 0.27941                    | 0.54412               | 0.17647          |
|                          | 45-49     | 0.35714                    | 0.45238               | 0.19048          | 0.38961                    | 0.40260               | 0.20779          |
|                          | 50-54     | 0.36667                    | 0.48333               | 0.15000          | 0.28571                    | 0.50649               | 0.20779          |
|                          | 55-59     | 0.41463                    | 0.34146               | 0.24390          | 0.27273                    | 0.48485               | 0.24242          |
| <b>Department<br/>99</b> | 0-4       | 0.78125                    | 0.18125               | 0.03750          | 0.84120                    | 0.12876               | 0.03004          |
|                          | 5-9       | 0.85714                    | 0.11111               | 0.03175          | 0.78109                    | 0.18408               | 0.03483          |
|                          | 10-14     | 0.82635                    | 0.13772               | 0.03593          | 0.76498                    | 0.17512               | 0.05991          |
|                          | 15-19     | 0.79200                    | 0.12800               | 0.08000          | 0.81106                    | 0.14747               | 0.04147          |
|                          | 20-24     | 0.72152                    | 0.20253               | 0.07595          | 0.61314                    | 0.32117               | 0.06569          |
|                          | 25-29     | 0.55446                    | 0.32673               | 0.11881          | 0.46094                    | 0.42188               | 0.11719          |
|                          | 30-34     | 0.46429                    | 0.38095               | 0.15476          | 0.43860                    | 0.37719               | 0.18421          |
|                          | 35-39     | 0.36000                    | 0.40000               | 0.24000          | 0.27451                    | 0.54902               | 0.17647          |
|                          | 40-44     | 0.37097                    | 0.35484               | 0.27419          | 0.29213                    | 0.43820               | 0.26966          |
|                          | 45-49     | 0.25862                    | 0.41379               | 0.32759          | 0.33333                    | 0.38710               | 0.27957          |
|                          | 50-54     | 0.36667                    | 0.35000               | 0.28333          | 0.27778                    | 0.51852               | 0.20370          |
|                          | 55-59     | 0.17857                    | 0.67857               | 0.14286          | 0.34783                    | 0.43478               | 0.21739          |

**Table 154. Prevalent rates of middle socioeconomic status population by age group, and body mass index category (Orinoquia y Amazonia region)**

| Departments   | Age group | Not- overweight in 2005 | Overweight in 2005 | Obese in 2005 | Not- overweight in 2010 | Overweight in 2010 | Obese in 2010 |
|---------------|-----------|-------------------------|--------------------|---------------|-------------------------|--------------------|---------------|
| Department 81 | 0-4       | 0.74444                 | 0.24444            | 0.01111       | 0.76860                 | 0.16529            | 0.06612       |
|               | 5-9       | 0.79070                 | 0.16279            | 0.04651       | 0.80451                 | 0.13534            | 0.06015       |
|               | 10-14     | 0.77632                 | 0.17105            | 0.05263       | 0.76056                 | 0.19014            | 0.04930       |
|               | 15-19     | 0.77465                 | 0.16901            | 0.05634       | 0.80000                 | 0.14615            | 0.05385       |
|               | 20-24     | 0.71014                 | 0.21739            | 0.07246       | 0.62366                 | 0.24731            | 0.12903       |
|               | 25-29     | 0.50000                 | 0.37500            | 0.12500       | 0.45882                 | 0.38824            | 0.15294       |
|               | 30-34     | 0.35714                 | 0.48214            | 0.16071       | 0.35106                 | 0.41489            | 0.23404       |
|               | 35-39     | 0.31481                 | 0.40741            | 0.27778       | 0.40506                 | 0.40506            | 0.18987       |
|               | 40-44     | 0.33333                 | 0.30952            | 0.35714       | 0.26761                 | 0.50704            | 0.22535       |
|               | 45-49     | 0.16667                 | 0.58333            | 0.25000       | 0.23881                 | 0.43284            | 0.32836       |
|               | 50-54     | 0.30769                 | 0.50000            | 0.19231       | 0.26190                 | 0.45238            | 0.28571       |
| 55-59         | 0.40000   | 0.26667                 | 0.33333            | 0.26667       | 0.33333                 | 0.40000            |               |
| Department 85 | 0-4       | 0.84615                 | 0.13846            | 0.01538       | 0.77419                 | 0.18548            | 0.04032       |
|               | 5-9       | 0.82609                 | 0.13043            | 0.04348       | 0.75000                 | 0.20833            | 0.04167       |
|               | 10-14     | 0.81034                 | 0.12069            | 0.06897       | 0.79688                 | 0.15625            | 0.04688       |
|               | 15-19     | 0.80000                 | 0.18000            | 0.02000       | 0.82243                 | 0.13084            | 0.04673       |
|               | 20-24     | 0.66667                 | 0.24074            | 0.09259       | 0.69231                 | 0.20513            | 0.10256       |
|               | 25-29     | 0.48387                 | 0.38710            | 0.12903       | 0.52222                 | 0.31111            | 0.16667       |
|               | 30-34     | 0.68421                 | 0.21053            | 0.10526       | 0.35065                 | 0.40260            | 0.24675       |
|               | 35-39     | 0.32258                 | 0.58065            | 0.09677       | 0.33766                 | 0.46753            | 0.19481       |
|               | 40-44     | 0.36000                 | 0.36000            | 0.28000       | 0.29630                 | 0.33333            | 0.37037       |
|               | 45-49     | 0.16667                 | 0.58333            | 0.25000       | 0.19048                 | 0.52381            | 0.28571       |
|               | 50-54     | 0.22222                 | 0.44444            | 0.33333       | 0.26471                 | 0.26471            | 0.47059       |
| 55-59         | 0.29412   | 0.23529                 | 0.47059            | 0.24138       | 0.44828                 | 0.31034            |               |
| Department 86 | 0-4       | 0.76190                 | 0.15873            | 0.07937       | 0.76389                 | 0.18056            | 0.05556       |
|               | 5-9       | 0.85294                 | 0.11765            | 0.02941       | 0.75824                 | 0.15385            | 0.08791       |
|               | 10-14     | 0.72222                 | 0.19444            | 0.08333       | 0.74026                 | 0.23377            | 0.02597       |
|               | 15-19     | 0.77273                 | 0.18182            | 0.04545       | 0.83784                 | 0.10811            | 0.05405       |
|               | 20-24     | 0.60000                 | 0.28889            | 0.11111       | 0.64789                 | 0.29577            | 0.05634       |
|               | 25-29     | 0.62745                 | 0.25490            | 0.11765       | 0.59524                 | 0.33333            | 0.07143       |
|               | 30-34     | 0.31111                 | 0.44444            | 0.24444       | 0.37705                 | 0.40984            | 0.21311       |
|               | 35-39     | 0.31707                 | 0.48780            | 0.19512       | 0.29787                 | 0.48936            | 0.21277       |
|               | 40-44     | 0.33333                 | 0.40741            | 0.25926       | 0.32075                 | 0.50943            | 0.16981       |
|               | 45-49     | 0.30000                 | 0.45000            | 0.25000       | 0.25581                 | 0.48837            | 0.25581       |
|               | 50-54     | 0.17391                 | 0.39130            | 0.43478       | 0.25000                 | 0.46429            | 0.28571       |
| 55-59         | 0.11111   | 0.38889                 | 0.50000            | 0.26667       | 0.60000                 | 0.13333            |               |
| Department 91 | 0-4       | 0.78824                 | 0.17059            | 0.04118       | 0.81250                 | 0.12500            | 0.06250       |
|               | 5-9       | 0.89655                 | 0.08621            | 0.01724       | 0.66667                 | 0.25000            | 0.08333       |
|               | 10-14     | 0.89041                 | 0.08219            | 0.02740       | 0.78049                 | 0.12195            | 0.09756       |
|               | 15-19     | 0.86813                 | 0.12088            | 0.01099       | 0.85000                 | 0.12500            | 0.02500       |

| Departments              | Age group | Not- overweight<br>in 2005 | Overweight<br>in 2005 | Obese in<br>2005 | Not- overweight<br>in 2010 | Overweight<br>in 2010 | Obese in<br>2010 |
|--------------------------|-----------|----------------------------|-----------------------|------------------|----------------------------|-----------------------|------------------|
|                          | 20-24     | 0.81065                    | 0.12426               | 0.06509          | 0.77419                    | 0.06452               | 0.16129          |
|                          | 25-29     | 0.63830                    | 0.24823               | 0.11348          | 0.51724                    | 0.37931               | 0.10345          |
|                          | 30-34     | 0.53846                    | 0.36538               | 0.09615          | 0.36842                    | 0.34211               | 0.28947          |
|                          | 35-39     | 0.56075                    | 0.30841               | 0.13084          | 0.40000                    | 0.40000               | 0.20000          |
|                          | 40-44     | 0.35238                    | 0.45714               | 0.19048          | 0.38889                    | 0.33333               | 0.27778          |
|                          | 45-49     | 0.37374                    | 0.45455               | 0.17172          | 0.13793                    | 0.48276               | 0.37931          |
|                          | 50-54     | 0.37143                    | 0.37143               | 0.25714          | 0.07692                    | 0.50000               | 0.42308          |
|                          | 55-59     | 0.54000                    | 0.32000               | 0.14000          | 0.20000                    | 0.53333               | 0.26667          |
| <b>Department<br/>94</b> | 0-4       | 0.78824                    | 0.17059               | 0.04118          | 0.74359                    | 0.20940               | 0.04701          |
|                          | 5-9       | 0.89655                    | 0.08621               | 0.01724          | 0.71642                    | 0.20398               | 0.07960          |
|                          | 10-14     | 0.89041                    | 0.08219               | 0.02740          | 0.76132                    | 0.15638               | 0.08230          |
|                          | 15-19     | 0.86813                    | 0.12088               | 0.01099          | 0.72487                    | 0.22222               | 0.05291          |
|                          | 20-24     | 0.81065                    | 0.12426               | 0.06509          | 0.61940                    | 0.29104               | 0.08955          |
|                          | 25-29     | 0.63830                    | 0.24823               | 0.11348          | 0.37162                    | 0.41216               | 0.21622          |
|                          | 30-34     | 0.53846                    | 0.36538               | 0.09615          | 0.34375                    | 0.46094               | 0.19531          |
|                          | 35-39     | 0.56075                    | 0.30841               | 0.13084          | 0.33333                    | 0.39048               | 0.27619          |
|                          | 40-44     | 0.35238                    | 0.45714               | 0.19048          | 0.20000                    | 0.45000               | 0.35000          |
|                          | 45-49     | 0.37374                    | 0.45455               | 0.17172          | 0.34146                    | 0.36585               | 0.29268          |
|                          | 50-54     | 0.37143                    | 0.37143               | 0.25714          | 0.18421                    | 0.52632               | 0.28947          |
|                          | 55-59     | 0.54000                    | 0.32000               | 0.14000          | 0.30357                    | 0.44643               | 0.25000          |
| <b>Department<br/>95</b> | 0-4       | 0.78824                    | 0.17059               | 0.04118          | 0.50000                    | 0.31818               | 0.18182          |
|                          | 5-9       | 0.89655                    | 0.08621               | 0.01724          | 0.71429                    | 0.20000               | 0.08571          |
|                          | 10-14     | 0.89041                    | 0.08219               | 0.02740          | 0.77419                    | 0.12903               | 0.09677          |
|                          | 15-19     | 0.86813                    | 0.12088               | 0.01099          | 0.77778                    | 0.11111               | 0.11111          |
|                          | 20-24     | 0.81065                    | 0.12426               | 0.06509          | 0.69565                    | 0.26087               | 0.04348          |
|                          | 25-29     | 0.63830                    | 0.24823               | 0.11348          | 0.46154                    | 0.38462               | 0.15385          |
|                          | 30-34     | 0.53846                    | 0.36538               | 0.09615          | 0.28571                    | 0.57143               | 0.14286          |
|                          | 35-39     | 0.56075                    | 0.30841               | 0.13084          | 0.26667                    | 0.40000               | 0.33333          |
|                          | 40-44     | 0.35238                    | 0.45714               | 0.19048          | 0.12000                    | 0.40000               | 0.48000          |
|                          | 45-49     | 0.37374                    | 0.45455               | 0.17172          | 0.16000                    | 0.36000               | 0.48000          |
|                          | 50-54     | 0.37143                    | 0.37143               | 0.25714          | 0.08333                    | 0.58333               | 0.33333          |
|                          | 55-59     | 0.54000                    | 0.32000               | 0.14000          | 0.18182                    | 0.36364               | 0.45455          |
| <b>Department<br/>97</b> | 0-4       | 0.66667                    | 0.33333               | 0.00000          | 0.42857                    | 0.28571               | 0.28571          |
|                          | 5-9       | 0.76471                    | 0.17647               | 0.05882          | 0.50000                    | 0.50000               | 0.00000          |
|                          | 10-14     | 0.84615                    | 0.15385               | 0.00000          | 0.71429                    | 0.28571               | 0.00000          |
|                          | 15-19     | 0.75000                    | 0.25000               | 0.00000          | 0.66667                    | 0.33333               | 0.00000          |
|                          | 20-24     | 0.76923                    | 0.23077               | 0.00000          | 1.00000                    | 0.00000               | 0.00000          |
|                          | 25-29     | 0.66667                    | 0.33333               | 0.00000          | 0.57143                    | 0.42857               | 0.00000          |
|                          | 30-34     | 0.30000                    | 0.55000               | 0.15000          | 0.40000                    | 0.40000               | 0.20000          |
|                          | 35-39     | 0.50000                    | 0.35714               | 0.14286          | 0.33333                    | 0.50000               | 0.16667          |
|                          | 40-44     | 0.45000                    | 0.35000               | 0.20000          | 0.33333                    | 0.00000               | 0.66667          |
|                          | 45-49     | 0.52632                    | 0.31579               | 0.15789          | 0.00000                    | 0.66667               | 0.33333          |
|                          | 50-54     | 0.22222                    | 0.77778               | 0.00000          | 1.00000                    | 0.00000               | 0.00000          |
|                          | 55-59     | 0.37500                    | 0.62500               | 0.00000          | 0.20000                    | 0.20000               | 0.60000          |
| <b>Department</b>        | 0-4       | 0.73529                    | 0.20588               | 0.05882          | 0.80000                    | 0.10000               | 0.10000          |

| Departments | Age group | Not- overweight in 2005 | Overweight in 2005 | Obese in 2005 | Not- overweight in 2010 | Overweight in 2010 | Obese in 2010 |
|-------------|-----------|-------------------------|--------------------|---------------|-------------------------|--------------------|---------------|
| 99          | 5-9       | 0.80000                 | 0.14000            | 0.06000       | 0.63636                 | 0.36364            | 0.00000       |
|             | 10-14     | 0.75000                 | 0.15385            | 0.09615       | 0.78571                 | 0.14286            | 0.07143       |
|             | 15-19     | 0.82927                 | 0.14634            | 0.02439       | 0.50000                 | 0.50000            | 0.00000       |
|             | 20-24     | 0.80000                 | 0.15000            | 0.05000       | 0.44444                 | 0.55556            | 0.00000       |
|             | 25-29     | 0.51724                 | 0.31034            | 0.17241       | 0.64286                 | 0.14286            | 0.21429       |
|             | 30-34     | 0.39394                 | 0.39394            | 0.21212       | 0.22222                 | 0.66667            | 0.11111       |
|             | 35-39     | 0.25806                 | 0.38710            | 0.35484       | 0.25000                 | 0.50000            | 0.25000       |
|             | 40-44     | 0.14706                 | 0.38235            | 0.47059       | 0.00000                 | 0.14286            | 0.85714       |
|             | 45-49     | 0.35294                 | 0.38235            | 0.26471       | 0.10000                 | 0.40000            | 0.50000       |
|             | 50-54     | 0.27273                 | 0.40909            | 0.31818       | 0.33333                 | 0.33333            | 0.33333       |
| 55-59       | 0.20000   | 0.60000                 | 0.20000            | 0.50000       | 0.25000                 | 0.25000            |               |

**Table 155. Prevalent rates of higher socioeconomic status population by age group, and body mass index category (Orinoquia y Amazonia region)**

| Departments   | Age group | Not- overweight in 2005 | Overweight in 2005 | Obese in 2005 | Not- overweight in 2010 | Overweight in 2010 | Obese in 2010 |
|---------------|-----------|-------------------------|--------------------|---------------|-------------------------|--------------------|---------------|
| Department 81 | 0-4       | 0.84211                 | 0.10526            | 0.05263       | 0.64286                 | 0.21429            | 0.14286       |
|               | 5-9       | 0.77551                 | 0.16327            | 0.06122       | 0.62500                 | 0.20833            | 0.16667       |
|               | 10-14     | 0.81356                 | 0.08475            | 0.10169       | 0.60606                 | 0.36364            | 0.03030       |
|               | 15-19     | 0.73077                 | 0.17308            | 0.09615       | 0.67857                 | 0.25000            | 0.07143       |
|               | 20-24     | 0.71111                 | 0.24444            | 0.04444       | 0.55556                 | 0.33333            | 0.11111       |
|               | 25-29     | 0.52632                 | 0.31579            | 0.15789       | 0.46154                 | 0.38462            | 0.15385       |
|               | 30-34     | 0.44231                 | 0.32692            | 0.23077       | 0.31579                 | 0.47368            | 0.21053       |
|               | 35-39     | 0.34000                 | 0.44000            | 0.22000       | 0.23333                 | 0.60000            | 0.16667       |
|               | 40-44     | 0.19298                 | 0.38596            | 0.42105       | 0.21429                 | 0.60714            | 0.17857       |
|               | 45-49     | 0.22449                 | 0.46939            | 0.30612       | 0.18182                 | 0.54545            | 0.27273       |
|               | 50-54     | 0.22581                 | 0.35484            | 0.41935       | 0.30435                 | 0.26087            | 0.43478       |
| 55-59         | 0.10000   | 0.35000                 | 0.55000            | 0.20000       | 0.40000                 | 0.40000            |               |
| Department 85 | 0-4       | 0.78431                 | 0.15686            | 0.05882       | 0.84932                 | 0.10959            | 0.04110       |
|               | 5-9       | 0.80000                 | 0.12727            | 0.07273       | 0.82243                 | 0.08411            | 0.09346       |
|               | 10-14     | 0.81356                 | 0.16949            | 0.01695       | 0.72277                 | 0.21782            | 0.05941       |
|               | 15-19     | 0.84375                 | 0.14063            | 0.01563       | 0.77174                 | 0.18478            | 0.04348       |
|               | 20-24     | 0.80882                 | 0.14706            | 0.04412       | 0.68852                 | 0.24590            | 0.06557       |
|               | 25-29     | 0.61765                 | 0.27941            | 0.10294       | 0.49275                 | 0.36232            | 0.14493       |
|               | 30-34     | 0.45652                 | 0.43478            | 0.10870       | 0.38028                 | 0.45070            | 0.16901       |
|               | 35-39     | 0.22000                 | 0.58000            | 0.20000       | 0.16923                 | 0.53846            | 0.29231       |
|               | 40-44     | 0.20930                 | 0.37209            | 0.41860       | 0.28125                 | 0.42188            | 0.29688       |
|               | 45-49     | 0.27907                 | 0.46512            | 0.25581       | 0.15873                 | 0.60317            | 0.23810       |
|               | 50-54     | 0.21875                 | 0.59375            | 0.18750       | 0.21569                 | 0.56863            | 0.21569       |
| 55-59         | 0.18182   | 0.54545                 | 0.27273            | 0.14286       | 0.50000                 | 0.35714            |               |
| Department 91 | 0-4       | 0.72826                 | 0.20652            | 0.06522       | 1.00000                 | 0.00000            | 0.00000       |
|               | 5-9       | 0.74390                 | 0.13415            | 0.12195       | 0.20000                 | 0.80000            | 0.00000       |
|               | 10-14     | 0.68132                 | 0.24176            | 0.07692       | 0.44444                 | 0.33333            | 0.22222       |
|               | 15-19     | 0.81379                 | 0.14483            | 0.04138       | 0.28571                 | 0.57143            | 0.14286       |

| Departments | Age group | Not- overweight in 2005 | Overweight in 2005 | Obese in 2005 | Not- overweight in 2010 | Overweight in 2010 | Obese in 2010 |
|-------------|-----------|-------------------------|--------------------|---------------|-------------------------|--------------------|---------------|
|             | 20-24     | 0.72961                 | 0.20601            | 0.06438       | 0.00000                 | 0.00000            | 1.00000       |
|             | 25-29     | 0.60989                 | 0.28022            | 0.10989       | 0.20000                 | 0.80000            | 0.00000       |
|             | 30-34     | 0.41808                 | 0.36158            | 0.22034       | 0.00000                 | 0.80000            | 0.20000       |
|             | 35-39     | 0.40000                 | 0.42581            | 0.17419       | 0.00000                 | 0.60000            | 0.40000       |
|             | 40-44     | 0.35526                 | 0.39474            | 0.25000       | 0.14286                 | 0.57143            | 0.28571       |
|             | 45-49     | 0.36301                 | 0.41781            | 0.21918       | 0.00000                 | 0.44444            | 0.55556       |
|             | 50-54     | 0.25833                 | 0.42500            | 0.31667       | 0.14286                 | 0.57143            | 0.28571       |
|             | 55-59     | 0.23762                 | 0.53465            | 0.22772       | 0.20000                 | 0.20000            | 0.60000       |

**Table 156. Mortality rates and population size by age group at the department level without segregate by socioeconomic status (Orinoquia y Amazonia region) <sup>†</sup>**

| Departments   | Age group | Mortality rates (R) (%/year) | Not- overweight population in 2005 (Number of people) <sup>1</sup> | Overweight population in 2005 (Number of people) <sup>2</sup> | Obese population in 2005 (Number of people) <sup>3</sup> |
|---------------|-----------|------------------------------|--------------------------------------------------------------------|---------------------------------------------------------------|----------------------------------------------------------|
| Department 81 | 0-4       | 0.00364                      | 14605                                                              | 4029                                                          | 336                                                      |
|               | 5-9       | 0.00035                      | 14077                                                              | 2360                                                          | 674                                                      |
|               | 10-14     | 0.00038                      | 12903                                                              | 2191                                                          | 893                                                      |
|               | 15-19     | 0.00192                      | 10916                                                              | 2408                                                          | 722                                                      |
|               | 20-24     | 0.00369                      | 9600                                                               | 2437                                                          | 960                                                      |
|               | 25-29     | 0.00263                      | 6017                                                               | 3521                                                          | 1472                                                     |
|               | 30-34     | 0.00211                      | 4383                                                               | 3835                                                          | 1712                                                     |
|               | 35-39     | 0.00198                      | 3385                                                               | 3452                                                          | 2257                                                     |
|               | 40-44     | 0.00268                      | 2274                                                               | 3291                                                          | 2633                                                     |
|               | 45-49     | 0.00276                      | 1675                                                               | 3040                                                          | 1799                                                     |
|               | 50-54     | 0.00547                      | 1128                                                               | 2018                                                          | 1425                                                     |
| 55-59         | 0.00801   | 999                          | 1071                                                               | 1427                                                          |                                                          |
| Department 85 | 0-4       | 0.00325                      | 18069                                                              | 3764                                                          | 627                                                      |
|               | 5-9       | 0.00026                      | 19677                                                              | 2530                                                          | 984                                                      |
|               | 10-14     | 0.00047                      | 19071                                                              | 3330                                                          | 757                                                      |
|               | 15-19     | 0.00114                      | 17111                                                              | 3422                                                          | 527                                                      |
|               | 20-24     | 0.00246                      | 13078                                                              | 3366                                                          | 1058                                                     |
|               | 25-29     | 0.00259                      | 10354                                                              | 4786                                                          | 1856                                                     |
|               | 30-34     | 0.00271                      | 8511                                                               | 5216                                                          | 1785                                                     |
|               | 35-39     | 0.00228                      | 4173                                                               | 8068                                                          | 2226                                                     |
|               | 40-44     | 0.00230                      | 3519                                                               | 4737                                                          | 3925                                                     |
|               | 45-49     | 0.00254                      | 2577                                                               | 4786                                                          | 2086                                                     |
|               | 50-54     | 0.00430                      | 1776                                                               | 3664                                                          | 1776                                                     |
| 55-59         | 0.00946   | 1344                         | 2199                                                               | 1955                                                          |                                                          |
| Department 86 | 0-4       | 0.00300                      | 12885                                                              | 2726                                                          | 743                                                      |
|               | 5-9       | 0.00024                      | 12709                                                              | 3177                                                          | 867                                                      |
|               | 10-14     | 0.00012                      | 13359                                                              | 2175                                                          | 1243                                                     |
|               | 15-19     | 0.00175                      | 10227                                                              | 2309                                                          | 2309                                                     |

|    |                   |              |         |      |      |      |
|----|-------------------|--------------|---------|------|------|------|
| 1  |                   |              |         |      |      |      |
| 2  |                   |              |         |      |      |      |
| 3  |                   | <b>20-24</b> | 0.00407 | 9901 | 1500 | 2100 |
| 4  |                   | <b>25-29</b> | 0.00274 | 6891 | 3975 | 795  |
| 5  |                   | <b>30-34</b> | 0.00449 | 4081 | 4561 | 720  |
| 6  |                   | <b>35-39</b> | 0.00185 | 3885 | 3586 | 1195 |
| 7  |                   | <b>40-44</b> | 0.00284 | 2349 | 3524 | 1175 |
| 8  |                   | <b>45-49</b> | 0.00373 | 2073 | 2369 | 1185 |
| 9  |                   | <b>50-54</b> | 0.00636 | 1416 | 1982 | 850  |
| 10 |                   | <b>55-59</b> | 0.00633 | 0    | 1053 | 2105 |
| 11 |                   |              |         |      |      |      |
| 12 |                   |              |         |      |      |      |
| 13 | <b>Department</b> | <b>0-4</b>   | 0.01074 | 2249 | 417  | 126  |
| 14 | <b>91</b>         | <b>5-9</b>   | 0.00087 | 2795 | 559  | 107  |
| 15 |                   | <b>10-14</b> | 0.00080 | 2857 | 701  | 202  |
| 16 |                   | <b>15-19</b> | 0.00107 | 3027 | 520  | 173  |
| 17 |                   | <b>20-24</b> | 0.00129 | 1529 | 573  | 225  |
| 18 |                   | <b>25-29</b> | 0.00428 | 834  | 532  | 271  |
| 19 |                   | <b>30-34</b> | 0.00412 | 654  | 654  | 393  |
| 20 |                   | <b>35-39</b> | 0.00183 | 553  | 654  | 428  |
| 21 |                   | <b>40-44</b> | 0.00280 | 442  | 673  | 315  |
| 22 |                   | <b>45-49</b> | 0.00286 | 244  | 435  | 371  |
| 23 |                   | <b>50-54</b> | 0.00626 | 167  | 395  | 237  |
| 24 |                   | <b>55-59</b> | 0.00954 | 177  | 184  | 163  |
| 25 |                   |              |         |      |      |      |
| 26 | <b>Department</b> | <b>0-4</b>   | 0.00661 | 1086 | 217  | 59   |
| 27 | <b>94</b>         | <b>5-9</b>   | 0.00182 | 1206 | 301  | 137  |
| 28 |                   | <b>10-14</b> | 0.00000 | 1355 | 306  | 46   |
| 29 |                   | <b>15-19</b> | 0.00073 | 1070 | 251  | 43   |
| 30 |                   | <b>20-24</b> | 0.00531 | 476  | 203  | 74   |
| 31 |                   | <b>25-29</b> | 0.00139 | 403  | 245  | 70   |
| 32 |                   | <b>30-34</b> | 0.00145 | 363  | 234  | 95   |
| 33 |                   | <b>35-39</b> | 0.00151 | 271  | 262  | 129  |
| 34 |                   | <b>40-44</b> | 0.00333 | 216  | 278  | 106  |
| 35 |                   | <b>45-49</b> | 0.00437 | 161  | 166  | 131  |
| 36 |                   | <b>50-54</b> | 0.00797 | 71   | 136  | 43   |
| 37 |                   | <b>55-59</b> | 0.01266 | 87   | 100  | 50   |
| 38 |                   |              |         |      |      |      |
| 39 |                   |              |         |      |      |      |
| 40 | <b>Department</b> | <b>0-4</b>   | 0.00299 | 5634 | 1438 | 293  |
| 41 | <b>95</b>         | <b>5-9</b>   | 0.00041 | 6132 | 1120 | 147  |
| 42 |                   | <b>10-14</b> | 0.00013 | 6800 | 1094 | 78   |
| 43 |                   | <b>15-19</b> | 0.00065 | 5108 | 924  | 109  |
| 44 |                   | <b>20-24</b> | 0.00296 | 2547 | 725  | 110  |
| 45 |                   | <b>25-29</b> | 0.00424 | 1889 | 826  | 118  |
| 46 |                   | <b>30-34</b> | 0.00303 | 1248 | 1248 | 471  |
| 47 |                   | <b>35-39</b> | 0.00339 | 1230 | 1062 | 362  |
| 48 |                   | <b>40-44</b> | 0.00437 | 1333 | 1151 | 262  |
| 49 |                   | <b>45-49</b> | 0.00423 | 742  | 813  | 336  |
| 50 |                   | <b>50-54</b> | 0.00466 | 526  | 780  | 195  |
| 51 |                   | <b>55-59</b> | 0.00302 | 409  | 389  | 195  |
| 52 |                   |              |         |      |      |      |
| 53 |                   |              |         |      |      |      |
| 54 | <b>Department</b> | <b>0-4</b>   | 0.00092 | 1671 | 427  | 87   |
| 55 | <b>97</b>         | <b>5-9</b>   | 0.00100 | 1659 | 303  | 40   |
| 56 |                   | <b>10-14</b> | 0.00050 | 1697 | 273  | 20   |
| 57 |                   |              |         |      |      |      |
| 58 |                   |              |         |      |      |      |
| 59 |                   |              |         |      |      |      |
| 60 |                   |              |         |      |      |      |



|                      |              |         |      |     |     |
|----------------------|--------------|---------|------|-----|-----|
|                      | <b>15-19</b> | 0.00000 | 1512 | 274 | 32  |
|                      | <b>20-24</b> | 0.00096 | 783  | 223 | 34  |
|                      | <b>25-29</b> | 0.00000 | 486  | 213 | 30  |
|                      | <b>30-34</b> | 0.00122 | 346  | 346 | 130 |
|                      | <b>35-39</b> | 0.00127 | 364  | 314 | 107 |
|                      | <b>40-44</b> | 0.00402 | 363  | 313 | 71  |
|                      | <b>45-49</b> | 0.00000 | 236  | 258 | 107 |
|                      | <b>50-54</b> | 0.00233 | 151  | 223 | 56  |
|                      | <b>55-59</b> | 0.00424 | 97   | 93  | 46  |
| <b>Department 99</b> | <b>0-4</b>   | 0.00330 | 2322 | 588 | 118 |
|                      | <b>5-9</b>   | 0.00033 | 2540 | 373 | 108 |
|                      | <b>10-14</b> | 0.00000 | 2525 | 466 | 151 |
|                      | <b>15-19</b> | 0.00000 | 2354 | 395 | 198 |
|                      | <b>20-24</b> | 0.00249 | 1173 | 309 | 123 |
|                      | <b>25-29</b> | 0.00260 | 665  | 349 | 141 |
|                      | <b>30-34</b> | 0.00080 | 570  | 465 | 218 |
|                      | <b>35-39</b> | 0.00170 | 389  | 470 | 317 |
|                      | <b>40-44</b> | 0.00192 | 301  | 401 | 341 |
|                      | <b>45-49</b> | 0.00113 | 256  | 370 | 256 |
|                      | <b>50-54</b> | 0.00163 | 209  | 223 | 180 |
|                      | <b>55-59</b> | 0.00691 | 71   | 273 | 91  |

†Values used in this table are for the urban population

<sup>1</sup> Initial value used in the stock of not-overweight population in 2005.

<sup>2</sup> Initial value used in the stock of overweight population in 2005.

<sup>3</sup> Initial value used in the stock of obese population in 2005.

**Table 157. Mortality rates and population size by age group at the department level for the lower socioeconomic status population (Orinoquia y Amazonia region) †**

| Departments          | Age group    | Mortality rates (R) (%/year) | Not-overweight population in 2005 (Number of people) <sup>1</sup> | Overweight population in 2005 (Number of people) <sup>2</sup> | Obese population in 2005 (Number of people) <sup>3</sup> |
|----------------------|--------------|------------------------------|-------------------------------------------------------------------|---------------------------------------------------------------|----------------------------------------------------------|
| <b>Department 81</b> | <b>0-4</b>   | 0.00364                      | 4952                                                              | 1679                                                          | 0                                                        |
|                      | <b>5-9</b>   | 0.00035                      | 5142                                                              | 506                                                           | 84                                                       |
|                      | <b>10-14</b> | 0.00038                      | 4220                                                              | 730                                                           | 81                                                       |
|                      | <b>15-19</b> | 0.00192                      | 3451                                                              | 722                                                           | 0                                                        |
|                      | <b>20-24</b> | 0.00369                      | 3618                                                              | 517                                                           | 443                                                      |
|                      | <b>25-29</b> | 0.00263                      | 1792                                                              | 640                                                           | 320                                                      |
|                      | <b>30-34</b> | 0.00211                      | 1438                                                              | 822                                                           | 274                                                      |
|                      | <b>35-39</b> | 0.00198                      | 1128                                                              | 531                                                           | 531                                                      |
|                      | <b>40-44</b> | 0.00268                      | 778                                                               | 1197                                                          | 299                                                      |
|                      | <b>45-49</b> | 0.00276                      | 620                                                               | 310                                                           | 310                                                      |
|                      | <b>50-54</b> | 0.00547                      | 237                                                               | 594                                                           | 356                                                      |
|                      | <b>55-59</b> | 0.00801                      | 428                                                               | 285                                                           | 285                                                      |
| <b>Department 85</b> | <b>0-4</b>   | 0.00325                      | 6149                                                              | 1631                                                          | 125                                                      |
|                      | <b>5-9</b>   | 0.00026                      | 5482                                                              | 281                                                           | 0                                                        |
|                      | <b>10-14</b> | 0.00047                      | 4692                                                              | 757                                                           | 0                                                        |

|                      |              |         |      |      |     |
|----------------------|--------------|---------|------|------|-----|
|                      | <b>15-19</b> | 0.00114 | 4739 | 1053 | 263 |
|                      | <b>20-24</b> | 0.00246 | 4327 | 1154 | 288 |
|                      | <b>25-29</b> | 0.00259 | 3321 | 586  | 391 |
|                      | <b>30-34</b> | 0.00271 | 2059 | 1373 | 549 |
|                      | <b>35-39</b> | 0.00228 | 1252 | 1530 | 417 |
|                      | <b>40-44</b> | 0.00230 | 1083 | 1354 | 541 |
|                      | <b>45-49</b> | 0.00254 | 614  | 614  | 0   |
|                      | <b>50-54</b> | 0.00430 | 555  | 666  | 444 |
|                      | <b>55-59</b> | 0.00946 | 244  | 244  | 244 |
| <b>Department 86</b> | <b>0-4</b>   | 0.00300 | 5468 | 1157 | 315 |
|                      | <b>5-9</b>   | 0.00024 | 4277 | 1069 | 292 |
|                      | <b>10-14</b> | 0.00012 | 4268 | 695  | 397 |
|                      | <b>15-19</b> | 0.00175 | 3668 | 828  | 828 |
|                      | <b>20-24</b> | 0.00407 | 3144 | 476  | 667 |
|                      | <b>25-29</b> | 0.00274 | 1934 | 1116 | 223 |
|                      | <b>30-34</b> | 0.00449 | 1125 | 1258 | 199 |
|                      | <b>35-39</b> | 0.00185 | 1163 | 1074 | 358 |
|                      | <b>40-44</b> | 0.00284 | 735  | 1102 | 367 |
|                      | <b>45-49</b> | 0.00373 | 476  | 544  | 272 |
|                      | <b>50-54</b> | 0.00636 | 423  | 593  | 254 |
|                      | <b>55-59</b> | 0.00633 | 0    | 250  | 500 |
| <b>Department 91</b> | <b>0-4</b>   | 0.01074 | 909  | 227  | 48  |
|                      | <b>5-9</b>   | 0.00087 | 993  | 105  | 66  |
|                      | <b>10-14</b> | 0.00080 | 992  | 160  | 50  |
|                      | <b>15-19</b> | 0.00107 | 1171 | 138  | 25  |
|                      | <b>20-24</b> | 0.00129 | 578  | 122  | 39  |
|                      | <b>25-29</b> | 0.00428 | 280  | 126  | 53  |
|                      | <b>30-34</b> | 0.00412 | 247  | 151  | 71  |
|                      | <b>35-39</b> | 0.00183 | 247  | 171  | 71  |
|                      | <b>40-44</b> | 0.00280 | 191  | 170  | 86  |
|                      | <b>45-49</b> | 0.00286 | 95   | 96   | 51  |
|                      | <b>50-54</b> | 0.00626 | 90   | 86   | 63  |
|                      | <b>55-59</b> | 0.00954 | 47   | 52   | 25  |
| <b>Department 94</b> | <b>0-4</b>   | 0.00661 | 444  | 111  | 23  |
|                      | <b>5-9</b>   | 0.00182 | 472  | 50   | 31  |
|                      | <b>10-14</b> | 0.00000 | 450  | 72   | 23  |
|                      | <b>15-19</b> | 0.00073 | 430  | 51   | 9   |
|                      | <b>20-24</b> | 0.00531 | 187  | 39   | 13  |
|                      | <b>25-29</b> | 0.00139 | 123  | 55   | 23  |
|                      | <b>30-34</b> | 0.00145 | 100  | 61   | 29  |
|                      | <b>35-39</b> | 0.00151 | 100  | 69   | 29  |
|                      | <b>40-44</b> | 0.00333 | 80   | 71   | 36  |
|                      | <b>45-49</b> | 0.00437 | 41   | 42   | 22  |
|                      | <b>50-54</b> | 0.00797 | 28   | 27   | 20  |
|                      | <b>55-59</b> | 0.01266 | 21   | 24   | 11  |
| <b>Department 95</b> | <b>0-4</b>   | 0.00299 | 2399 | 600  | 127 |
|                      | <b>5-9</b>   | 0.00041 | 2124 | 224  | 142 |

|                      |              |         |      |     |     |
|----------------------|--------------|---------|------|-----|-----|
|                      | <b>10-14</b> | 0.00013 | 2103 | 338 | 106 |
|                      | <b>15-19</b> | 0.00065 | 1933 | 227 | 42  |
|                      | <b>20-24</b> | 0.00296 | 840  | 177 | 57  |
|                      | <b>25-29</b> | 0.00424 | 485  | 218 | 92  |
|                      | <b>30-34</b> | 0.00303 | 430  | 264 | 124 |
|                      | <b>35-39</b> | 0.00339 | 402  | 278 | 115 |
|                      | <b>40-44</b> | 0.00437 | 368  | 326 | 165 |
|                      | <b>45-49</b> | 0.00423 | 171  | 172 | 91  |
|                      | <b>50-54</b> | 0.00466 | 169  | 162 | 118 |
|                      | <b>55-59</b> | 0.00302 | 89   | 99  | 48  |
| <b>Department 97</b> | <b>0-4</b>   | 0.00092 | 1584 | 392 | 87  |
|                      | <b>5-9</b>   | 0.00100 | 1523 | 279 | 32  |
|                      | <b>10-14</b> | 0.00050 | 1522 | 228 | 13  |
|                      | <b>15-19</b> | 0.00000 | 1335 | 217 | 32  |
|                      | <b>20-24</b> | 0.00096 | 702  | 189 | 27  |
|                      | <b>25-29</b> | 0.00000 | 371  | 170 | 30  |
|                      | <b>30-34</b> | 0.00122 | 287  | 248 | 104 |
|                      | <b>35-39</b> | 0.00127 | 307  | 264 | 93  |
|                      | <b>40-44</b> | 0.00402 | 297  | 247 | 49  |
|                      | <b>45-49</b> | 0.00000 | 169  | 213 | 90  |
| <b>Department 99</b> | <b>0-4</b>   | 0.00233 | 123  | 162 | 50  |
|                      | <b>5-9</b>   | 0.00424 | 79   | 65  | 46  |
|                      | <b>0-4</b>   | 0.00330 | 1004 | 233 | 48  |
|                      | <b>5-9</b>   | 0.00033 | 871  | 113 | 32  |
|                      | <b>10-14</b> | 0.00000 | 830  | 138 | 36  |
|                      | <b>15-19</b> | 0.00000 | 837  | 135 | 85  |
|                      | <b>20-24</b> | 0.00249 | 368  | 103 | 39  |
|                      | <b>25-29</b> | 0.00260 | 180  | 106 | 39  |
|                      | <b>30-34</b> | 0.00080 | 160  | 132 | 53  |
|                      | <b>35-39</b> | 0.00170 | 127  | 141 | 85  |
| <b>Department 81</b> | <b>40-44</b> | 0.00192 | 121  | 116 | 89  |
|                      | <b>45-49</b> | 0.00113 | 52   | 84  | 66  |
|                      | <b>50-54</b> | 0.00163 | 67   | 64  | 52  |
|                      | <b>55-59</b> | 0.00691 | 18   | 70  | 15  |

†Values used in this table are for the urban population

<sup>1</sup> Initial value used in the stock of not-overweight population in 2005 for lower SES.

<sup>2</sup> Initial value used in the stock of overweight population in 2005 for lower SES.

<sup>3</sup> Initial value used in the stock of obese population in 2005 for lower SES.

**Table 158. Mortality rates and population size by age group at the department level for the middle socioeconomic status population (Orinoquia y Amazonia region) †**

| Departments          | Age group  | Mortality rates (R) (%/year) | Not-overweight population in 2005 (Number of people) <sup>1</sup> | Overweight population in 2005 (Number of people) <sup>2</sup> | Obese population in 2005 (Number of people) <sup>3</sup> |
|----------------------|------------|------------------------------|-------------------------------------------------------------------|---------------------------------------------------------------|----------------------------------------------------------|
| <b>Department 81</b> | <b>0-4</b> | 0.00364                      | 5624                                                              | 1847                                                          | 84                                                       |
|                      | <b>5-9</b> | 0.00035                      | 5732                                                              | 1180                                                          | 337                                                      |

|    |                   |              |         |      |      |     |
|----|-------------------|--------------|---------|------|------|-----|
| 1  |                   |              |         |      |      |     |
| 2  |                   |              |         |      |      |     |
| 3  |                   | <b>10-14</b> | 0.00038 | 4788 | 1055 | 325 |
| 4  |                   | <b>15-19</b> | 0.00192 | 4414 | 963  | 321 |
| 5  |                   | <b>20-24</b> | 0.00369 | 3618 | 1108 | 369 |
| 6  |                   | <b>25-29</b> | 0.00263 | 2304 | 1728 | 576 |
| 7  |                   | <b>30-34</b> | 0.00211 | 1370 | 1849 | 616 |
| 8  |                   | <b>35-39</b> | 0.00198 | 1128 | 1460 | 996 |
| 9  |                   | <b>40-44</b> | 0.00268 | 838  | 778  | 898 |
| 10 |                   | <b>45-49</b> | 0.00276 | 372  | 1303 | 558 |
| 11 |                   | <b>50-54</b> | 0.00547 | 475  | 772  | 297 |
| 12 |                   | <b>55-59</b> | 0.00801 | 428  | 285  | 357 |
| 13 |                   |              |         |      |      |     |
| 14 |                   |              |         |      |      |     |
| 15 | <b>Department</b> | <b>0-4</b>   | 0.00325 | 6901 | 1129 | 125 |
| 16 | <b>85</b>         | <b>5-9</b>   | 0.00026 | 8011 | 1265 | 422 |
| 17 |                   | <b>10-14</b> | 0.00047 | 7114 | 1060 | 605 |
| 18 |                   | <b>15-19</b> | 0.00114 | 5265 | 1185 | 132 |
| 19 |                   | <b>20-24</b> | 0.00246 | 3462 | 1250 | 481 |
| 20 |                   | <b>25-29</b> | 0.00259 | 2930 | 2344 | 781 |
| 21 |                   | <b>30-34</b> | 0.00271 | 3569 | 1098 | 549 |
| 22 |                   | <b>35-39</b> | 0.00228 | 1391 | 2504 | 417 |
| 23 |                   | <b>40-44</b> | 0.00230 | 1218 | 1218 | 947 |
| 24 |                   | <b>45-49</b> | 0.00254 | 491  | 1718 | 736 |
| 25 |                   | <b>50-54</b> | 0.00430 | 444  | 888  | 666 |
| 26 |                   | <b>55-59</b> | 0.00946 | 611  | 489  | 977 |
| 27 |                   |              |         |      |      |     |
| 28 |                   |              |         |      |      |     |
| 29 | <b>Department</b> | <b>0-4</b>   | 0.00300 | 3444 | 718  | 359 |
| 30 | <b>86</b>         | <b>5-9</b>   | 0.00024 | 3928 | 542  | 135 |
| 31 |                   | <b>10-14</b> | 0.00012 | 3670 | 988  | 423 |
| 32 |                   | <b>15-19</b> | 0.00175 | 2837 | 667  | 167 |
| 33 |                   | <b>20-24</b> | 0.00407 | 2324 | 1119 | 430 |
| 34 |                   | <b>25-29</b> | 0.00274 | 2298 | 933  | 431 |
| 35 |                   | <b>30-34</b> | 0.00449 | 781  | 1115 | 613 |
| 36 |                   | <b>35-39</b> | 0.00185 | 786  | 1209 | 484 |
| 37 |                   | <b>40-44</b> | 0.00284 | 660  | 806  | 513 |
| 38 |                   | <b>45-49</b> | 0.00373 | 526  | 788  | 438 |
| 39 |                   | <b>50-54</b> | 0.00636 | 191  | 429  | 477 |
| 40 |                   | <b>55-59</b> | 0.00633 | 89   | 310  | 399 |
| 41 |                   |              |         |      |      |     |
| 42 |                   |              |         |      |      |     |
| 43 | <b>Department</b> | <b>0-4</b>   | 0.01074 | 608  | 132  | 32  |
| 44 | <b>91</b>         | <b>5-9</b>   | 0.00087 | 853  | 82   | 16  |
| 45 |                   | <b>10-14</b> | 0.00080 | 1014 | 94   | 31  |
| 46 |                   | <b>15-19</b> | 0.00107 | 799  | 111  | 10  |
| 47 |                   | <b>20-24</b> | 0.00129 | 541  | 83   | 43  |
| 48 |                   | <b>25-29</b> | 0.00428 | 328  | 128  | 58  |
| 49 |                   | <b>30-34</b> | 0.00412 | 246  | 167  | 44  |
| 50 |                   | <b>35-39</b> | 0.00183 | 262  | 144  | 61  |
| 51 |                   | <b>40-44</b> | 0.00280 | 141  | 184  | 76  |
| 52 |                   | <b>45-49</b> | 0.00286 | 122  | 149  | 56  |
| 53 |                   | <b>50-54</b> | 0.00626 | 77   | 77   | 53  |
| 54 |                   | <b>55-59</b> | 0.00954 | 71   | 42   | 19  |
| 55 |                   |              |         |      |      |     |
| 56 | <b>Department</b> | <b>0-4</b>   | 0.00661 | 297  | 64   | 16  |
| 57 |                   |              |         |      |      |     |
| 58 |                   |              |         |      |      |     |
| 59 |                   |              |         |      |      |     |
| 60 |                   |              |         |      |      |     |

|    |                   |              |         |      |     |     |
|----|-------------------|--------------|---------|------|-----|-----|
| 1  |                   |              |         |      |     |     |
| 2  |                   |              |         |      |     |     |
| 3  |                   |              |         |      |     |     |
| 4  |                   |              |         |      |     |     |
| 5  |                   |              |         |      |     |     |
| 6  |                   |              |         |      |     |     |
| 7  |                   |              |         |      |     |     |
| 8  |                   |              |         |      |     |     |
| 9  |                   |              |         |      |     |     |
| 10 |                   |              |         |      |     |     |
| 11 |                   |              |         |      |     |     |
| 12 |                   |              |         |      |     |     |
| 13 |                   |              |         |      |     |     |
| 14 |                   |              |         |      |     |     |
| 15 |                   |              |         |      |     |     |
| 16 |                   |              |         |      |     |     |
| 17 |                   |              |         |      |     |     |
| 18 |                   |              |         |      |     |     |
| 19 |                   |              |         |      |     |     |
| 20 |                   |              |         |      |     |     |
| 21 |                   |              |         |      |     |     |
| 22 |                   |              |         |      |     |     |
| 23 |                   |              |         |      |     |     |
| 24 |                   |              |         |      |     |     |
| 25 |                   |              |         |      |     |     |
| 26 |                   |              |         |      |     |     |
| 27 |                   |              |         |      |     |     |
| 28 |                   |              |         |      |     |     |
| 29 |                   |              |         |      |     |     |
| 30 |                   |              |         |      |     |     |
| 31 |                   |              |         |      |     |     |
| 32 |                   |              |         |      |     |     |
| 33 |                   |              |         |      |     |     |
| 34 |                   |              |         |      |     |     |
| 35 |                   |              |         |      |     |     |
| 36 |                   |              |         |      |     |     |
| 37 |                   |              |         |      |     |     |
| 38 |                   |              |         |      |     |     |
| 39 |                   |              |         |      |     |     |
| 40 |                   |              |         |      |     |     |
| 41 |                   |              |         |      |     |     |
| 42 |                   |              |         |      |     |     |
| 43 |                   |              |         |      |     |     |
| 44 |                   |              |         |      |     |     |
| 45 |                   |              |         |      |     |     |
| 46 |                   |              |         |      |     |     |
| 47 |                   |              |         |      |     |     |
| 48 |                   |              |         |      |     |     |
| 49 |                   |              |         |      |     |     |
| 50 |                   |              |         |      |     |     |
| 51 |                   |              |         |      |     |     |
| 52 |                   |              |         |      |     |     |
| 53 |                   |              |         |      |     |     |
| 54 |                   |              |         |      |     |     |
| 55 |                   |              |         |      |     |     |
| 56 |                   |              |         |      |     |     |
| 57 |                   |              |         |      |     |     |
| 58 |                   |              |         |      |     |     |
| 59 |                   |              |         |      |     |     |
| 60 |                   |              |         |      |     |     |
|    | <b>94</b>         | <b>5-9</b>   | 0.00182 | 405  | 39  | 8   |
|    |                   | <b>10-14</b> | 0.00000 | 460  | 42  | 14  |
|    |                   | <b>15-19</b> | 0.00073 | 293  | 41  | 4   |
|    |                   | <b>20-24</b> | 0.00531 | 175  | 27  | 14  |
|    |                   | <b>25-29</b> | 0.00139 | 144  | 56  | 26  |
|    |                   | <b>30-34</b> | 0.00145 | 100  | 68  | 18  |
|    |                   | <b>35-39</b> | 0.00151 | 106  | 58  | 25  |
|    |                   | <b>40-44</b> | 0.00333 | 59   | 77  | 32  |
|    |                   | <b>45-49</b> | 0.00437 | 53   | 65  | 24  |
|    |                   | <b>50-54</b> | 0.00797 | 24   | 24  | 17  |
|    |                   | <b>55-59</b> | 0.01266 | 32   | 19  | 8   |
|    | <b>Department</b> | <b>0-4</b>   | 0.00299 | 1605 | 347 | 84  |
|    | <b>95</b>         | <b>5-9</b>   | 0.00041 | 1824 | 175 | 35  |
|    |                   | <b>10-14</b> | 0.00013 | 2150 | 198 | 66  |
|    |                   | <b>15-19</b> | 0.00065 | 1318 | 184 | 17  |
|    |                   | <b>20-24</b> | 0.00296 | 787  | 121 | 63  |
|    |                   | <b>25-29</b> | 0.00424 | 568  | 221 | 101 |
|    |                   | <b>30-34</b> | 0.00303 | 428  | 291 | 76  |
|    |                   | <b>35-39</b> | 0.00339 | 426  | 234 | 99  |
|    |                   | <b>40-44</b> | 0.00437 | 272  | 352 | 147 |
|    |                   | <b>45-49</b> | 0.00423 | 220  | 268 | 101 |
|    |                   | <b>50-54</b> | 0.00466 | 144  | 144 | 100 |
|    |                   | <b>55-59</b> | 0.00302 | 135  | 80  | 35  |
|    | <b>Department</b> | <b>0-4</b>   | 0.00092 | 52   | 26  | 0   |
|    | <b>97</b>         | <b>5-9</b>   | 0.00100 | 104  | 24  | 8   |
|    |                   | <b>10-14</b> | 0.00050 | 143  | 26  | 0   |
|    |                   | <b>15-19</b> | 0.00000 | 145  | 48  | 0   |
|    |                   | <b>20-24</b> | 0.00096 | 67   | 20  | 0   |
|    |                   | <b>25-29</b> | 0.00000 | 61   | 30  | 0   |
|    |                   | <b>30-34</b> | 0.00122 | 39   | 72  | 20  |
|    |                   | <b>35-39</b> | 0.00127 | 50   | 36  | 14  |
|    |                   | <b>40-44</b> | 0.00402 | 49   | 38  | 22  |
|    |                   | <b>45-49</b> | 0.00000 | 56   | 34  | 17  |
|    |                   | <b>50-54</b> | 0.00233 | 11   | 39  | 0   |
|    |                   | <b>55-59</b> | 0.00424 | 14   | 23  | 0   |
|    | <b>Department</b> | <b>0-4</b>   | 0.00330 | 615  | 172 | 49  |
|    | <b>99</b>         | <b>5-9</b>   | 0.00033 | 664  | 116 | 50  |
|    |                   | <b>10-14</b> | 0.00000 | 714  | 146 | 92  |
|    |                   | <b>15-19</b> | 0.00000 | 604  | 107 | 18  |
|    |                   | <b>20-24</b> | 0.00249 | 368  | 69  | 23  |
|    |                   | <b>25-29</b> | 0.00260 | 188  | 113 | 63  |
|    |                   | <b>30-34</b> | 0.00080 | 132  | 132 | 71  |
|    |                   | <b>35-39</b> | 0.00170 | 87   | 130 | 119 |
|    |                   | <b>40-44</b> | 0.00192 | 43   | 112 | 138 |
|    |                   | <b>45-49</b> | 0.00113 | 97   | 105 | 73  |
|    |                   | <b>50-54</b> | 0.00163 | 43   | 65  | 50  |
|    |                   | <b>55-59</b> | 0.00691 | 22   | 66  | 22  |

†Values used in this table are for the urban population

1 Initial value used in the stock of not-overweight population in 2005 for middle SES.

2 Initial value used in the stock of overweight population in 2005 for middle SES.

3 Initial value used in the stock of obese population in 2005 for middle SES.

**Table 159. Mortality rates and population size by age group at the department level for the higher socioeconomic status population (Orinoquia y Amazonia region) †**

| Departments   | Age group | Mortality rates (R) (%/year) | Not-overweight population in 2005 (Number of people) <sup>1</sup> | Overweight population in 2005 (Number of people) <sup>2</sup> | Obese population in 2005 (Number of people) <sup>3</sup> |
|---------------|-----------|------------------------------|-------------------------------------------------------------------|---------------------------------------------------------------|----------------------------------------------------------|
| Department 81 | 0-4       | 0.00364                      | 4029                                                              | 504                                                           | 252                                                      |
|               | 5-9       | 0.00035                      | 3203                                                              | 674                                                           | 253                                                      |
|               | 10-14     | 0.00038                      | 3895                                                              | 406                                                           | 487                                                      |
|               | 15-19     | 0.00192                      | 3050                                                              | 722                                                           | 401                                                      |
|               | 20-24     | 0.00369                      | 2363                                                              | 812                                                           | 148                                                      |
|               | 25-29     | 0.00263                      | 1920                                                              | 1152                                                          | 576                                                      |
|               | 30-34     | 0.00211                      | 1575                                                              | 1164                                                          | 822                                                      |
|               | 35-39     | 0.00198                      | 1128                                                              | 1460                                                          | 730                                                      |
|               | 40-44     | 0.00268                      | 658                                                               | 1316                                                          | 1436                                                     |
|               | 45-49     | 0.00276                      | 683                                                               | 1427                                                          | 931                                                      |
| Department 85 | 0-4       | 0.00325                      | 5019                                                              | 1004                                                          | 376                                                      |
|               | 5-9       | 0.00026                      | 6184                                                              | 984                                                           | 562                                                      |
|               | 10-14     | 0.00047                      | 7265                                                              | 1514                                                          | 151                                                      |
|               | 15-19     | 0.00114                      | 7108                                                              | 1185                                                          | 132                                                      |
|               | 20-24     | 0.00246                      | 5289                                                              | 962                                                           | 288                                                      |
|               | 25-29     | 0.00259                      | 4102                                                              | 1856                                                          | 684                                                      |
|               | 30-34     | 0.00271                      | 2883                                                              | 2745                                                          | 686                                                      |
|               | 35-39     | 0.00228                      | 1530                                                              | 4034                                                          | 1391                                                     |
|               | 40-44     | 0.00230                      | 1218                                                              | 2166                                                          | 2436                                                     |
|               | 45-49     | 0.00254                      | 1473                                                              | 2454                                                          | 1350                                                     |
| Department 91 | 0-4       | 0.01074                      | 608                                                               | 173                                                           | 54                                                       |
|               | 5-9       | 0.00087                      | 1001                                                              | 180                                                           | 164                                                      |
|               | 10-14     | 0.00080                      | 967                                                               | 343                                                           | 109                                                      |
|               | 15-19     | 0.00107                      | 1193                                                              | 212                                                           | 61                                                       |
|               | 20-24     | 0.00129                      | 672                                                               | 190                                                           | 59                                                       |
|               | 25-29     | 0.00428                      | 405                                                               | 186                                                           | 73                                                       |
|               | 30-34     | 0.00412                      | 324                                                               | 281                                                           | 171                                                      |
|               | 35-39     | 0.00183                      | 271                                                               | 289                                                           | 118                                                      |
|               | 40-44     | 0.00280                      | 206                                                               | 229                                                           | 145                                                      |
|               | 45-49     | 0.00286                      | 175                                                               | 201                                                           | 106                                                      |
| Department 91 | 50-54     | 0.00626                      | 91                                                                | 150                                                           | 112                                                      |
|               | 55-59     | 0.00954                      | 64                                                                | 143                                                           | 61                                                       |

†Values used in this table are for the urban population

1  
2  
3 <sup>1</sup> Initial value used in the stock of not-overweight population in 2005 for higher SES.

4 <sup>2</sup> Initial value used in the stock of overweight population in 2005 for higher SES.

5 <sup>3</sup> Initial value used in the stock of obese population in 2005 for higher SES.

## 6 7 **References**

- 8  
9  
10 1 Departamento Administrativo Nacional de Estadística. Series de población.  
11 <http://www.dane.gov.co/index.php/estadisticas-por-tema/demografia-y-poblacion/series-de-poblacion>  
12 (accessed 11 Jul 2017).  
13  
14  
15  
16  
17  
18  
19  
20  
21  
22  
23  
24  
25  
26  
27  
28  
29  
30  
31  
32  
33  
34  
35  
36  
37  
38  
39  
40  
41  
42  
43  
44  
45  
46  
47  
48  
49  
50  
51  
52  
53  
54  
55  
56  
57  
58  
59  
60

For peer review only

1  
2  
3  
4  
5  
6  
7  
8  
9  
10  
11  
12  
13  
14  
15  
16  
17  
18  
19  
20  
21  
22  
23  
24  
25  
26  
27  
28  
29  
30  
31  
32  
33  
34  
35  
36  
37  
38  
39  
40  
41  
42  
43  
44  
45  
46  
47  
48  
49  
50  
51  
52  
53  
54  
55  
56  
57  
58  
59  
60

**Supplementary Information 3**

**Supplement to: Using a system dynamics model to understand the obesity transition by socioeconomic status in Colombia at the country, regional, and department level.**

For peer review only



**Table of contents**

**Section 1. Model of nutritional stage dynamics** ..... 3

**Section 2. Estimation of transferences rates between nutritional stages by age group, gender, and SES group** ..... 6

**Section 3. Map of Colombia by departments** ..... 8

**References** ..... 9

For peer review only

## Section 1. Model of nutritional stage dynamics

We developed a population-level system dynamics (SD) model which was based on a validated and calibrated model [1,2]. We used the following set of mathematical forms to study the obesity dynamics by socioeconomic status (SES) and gender at the country level. Specifically, equations (1-3) which correspond to the net rate of change of the population in each body mass index (BMI) category for the age group of zero to four years and equations (4-6) which correspond to the net rate of change of the population in each BMI category for the rest of the age groups:

$$\frac{dN_{0,j,k}(t)}{dt} = B_{N,j,k}(t) + \tau_{4,0,j,k}W_{0,j,k}(t) - \tau_{1,0,j,k}N_{0,j,k}(t) - E_{0,j,k}^N(t)(1 - S_{0,j}) - E_{0,j,k}^N(t)S_{0,j} \quad (1)$$

$$\frac{dW_{0,j,k}(t)}{dt} = B_{W,j,k}(t) + \tau_{1,0,j,k}N_{0,j,k}(t) + \tau_{3,0,j,k}O_{0,j,k}(t) - W_{0,j,k}(t)(\tau_{2,0,j,k} + \tau_{4,0,j,k}) - E_{0,j,k}^W(t)(1 - S_{0,j}) - E_{0,j,k}^W(t)S_{0,j} \quad (2)$$

$$\frac{dO_{0,j,k}(t)}{dt} = B_{O,j,k}(t) + \tau_{2,0,j,k}W_{0,j,k}(t) - \tau_{3,0,j,k}O_{0,j,k}(t) - E_{0,j,k}^O(t)(1 - S_{0,j}) - E_{0,j,k}^O(t)S_{0,j} \quad (3)$$

$$\frac{dN_{i,j,k}(t)}{dt} = E_{i-1,j,k}^N(t)S_{i-1,j} + \tau_{4,i,j,k}W_{i,j,k}(t) - \tau_{1,i,j,k}N_{i,j,k}(t) - E_{i,j,k}^N(t)(1 - S_{i,j}) - E_{i,j,k}^N(t)S_{i,j} \quad (4)$$

$$\frac{dW_{i,j,k}(t)}{dt} = E_{i-1,j,k}^W(t)S_{i-1,j} + \tau_{1,i,j,k}N_{i,j,k}(t) + \tau_{3,i,j,k}O_{i,j,k}(t) - W_{i,j,k}(t)(\tau_{2,i,j,k} + \tau_{4,i,j,k}) - E_{i,j,k}^W(t)(1 - S_{i,j}) - E_{i,j,k}^W(t)S_{i,j} \quad (5)$$

$$\frac{dO_{i,j,k}(t)}{dt} = E_{i-1,j,k}^O(t)S_{i-1,j} + \tau_{2,i,j,k}W_{i,j,k}(t) - \tau_{3,i,j,k}O_{i,j,k}(t) - E_{i,j,k}^O(t)(1 - S_{i,j}) - E_{i,j,k}^O(t)S_{i,j} \quad (6)$$

where  $i \in (0, \dots, 11)$  represents the age groups, in intervals of 5 years,  $j \in (1=\text{men}, 2=\text{women})$  represents the gender, and  $k \in (1=\text{lower}, 2=\text{middle}, \text{and } 3=\text{higher SES})$  represents the SES group of the simulated population;  $N_{i,j,k}(t)$ ,  $W_{i,j,k}(t)$ , and  $O_{i,j,k}(t)$  are the populations of *not-overweight*, *overweight*, and *obese* individuals in the age group  $i$ , gender  $j$  and SES group  $k$ , respectively, at time  $t$  (unit: people);  $B_{N,j,k}(t)$ ,  $B_{W,j,k}(t)$ , and  $B_{O,j,k}(t)$  are the births for each BMI category, gender  $j$ , and SES group  $k$  at time  $t$  (unit: people per year); and  $E_{i,j,k}^N(t)$ ,  $E_{i,j,k}^W(t)$ , and  $E_{i,j,k}^O(t)$  are the exit rates, which correspond to the total number of individuals per year that leave each age group  $i$  for each gender  $j$ , SES group  $k$ , and BMI category at time  $t$  (unit: people per year).  $E_{i,j,k}^N(t)S_{i,j}$ ,  $E_{i,j,k}^W(t)S_{i,j}$ , and  $E_{i,j,k}^O(t)S_{i,j}$  are the individuals who mature into the next age group for each BMI category, age group  $i$ , gender  $j$ , and SES group  $k$ , respectively, at time  $t$  (unit: people per year), and  $E_{i,j,k}^N(t)(1-S_{i,j})$ ,  $E_{i,j,k}^W(t)(1-S_{i,j})$ , and  $E_{i,j,k}^O(t)(1-S_{i,j})$  correspond to the individuals who die for each BMI category, age group  $i$ , gender  $j$ , and SES group  $k$ , respectively, at time  $t$  (unit: people per year).  $S_{i,j}$  is the survival fraction per year for each age group  $i$  and gender  $j$  (unit: % per year). The parameters  $\tau_{1,i,j,k}$  and  $\tau_{2,i,j,k}$  are the transference rates (TRs) that correspond to the fraction of individuals per year from the *not overweight* and the *overweight*

categories that become *overweight* and *obese* for each age group  $i$ , gender  $j$ , and SES group  $k$ , respectively (unit: % per year). The parameters  $\tau_{3,i,j,k}$  and  $\tau_{4,i,j,k}$  are the TRs of individuals from the *obese* to the *overweight* category and from the *overweight* to the *not overweight* category, respectively, from each age group  $i$ , gender  $j$ , and SES group  $k$ , respectively (unit: % per year). We used a heuristic to estimate the TRs between BMI categories by age, gender, and SES group using historical data from “Encuesta Nacional de la Situación Nutricional en Colombia” (ENSIN) of 2005 and 2010. This heuristic identifies the TRs that minimize the difference between prevalence rates by BMI category from 2010 ENSIN, and the model estimated prevalence rates by age, gender, and SES group. It does this by comparing ENSIN data from at least two points in time. Figure 1 shows the global view of the SD model structure at the country-level.

The number of births per year for each BMI category, gender, and SES group was determined using the following equations:

$$B_{N,j,k}(t) = \mu_j \theta_{N,j,k} \left( \frac{f(t)}{(Y_F - Y_I + 1)} \right) \sum_{i=Y_I}^{Y_F} (N_{i,2,k}(t) + W_{i,2,k}(t) + O_{i,2,k}(t)) \quad (7)$$

$$B_{W,j,k}(t) = \mu_j \theta_{W,j,k} \left( \frac{f(t)}{(Y_F - Y_I + 1)} \right) \sum_{i=Y_I}^{Y_F} (N_{i,2,k}(t) + W_{i,2,k}(t) + O_{i,2,k}(t)) \quad (8)$$

$$B_{O,j,k}(t) = \mu_j \theta_{O,j,k} \left( \frac{f(t)}{(Y_F - Y_I + 1)} \right) \sum_{i=Y_I}^{Y_F} (N_{i,2,k}(t) + W_{i,2,k}(t) + O_{i,2,k}(t)) \quad (9)$$

where  $\mu$  is the total fraction of births by gender  $j$  (unit: % per year);  $\theta_{N,j,k}$ ,  $\theta_{W,j,k}$  and  $\theta_{O,j,k}$  are the fraction of births (percent per year) for each BMI category, gender  $j$ , and SES group  $k$ , respectively, (also assumed to be the prevalence rates of children aged 0 to 12 months, by BMI category);  $\sum_{i=Y_I}^{Y_F} (N_{i,2,k}(t) + W_{i,2,k}(t) + O_{i,2,k}(t))$  is the size of the female population of childbearing age at time  $t$ ;  $f$  is the total number of children born from each woman during the childbearing years (fertility rate) at time  $t$ ; and  $Y_I$  and  $Y_F$  are the first and last childbearing years considered, which we assumed to be 15 to 49, respectively.

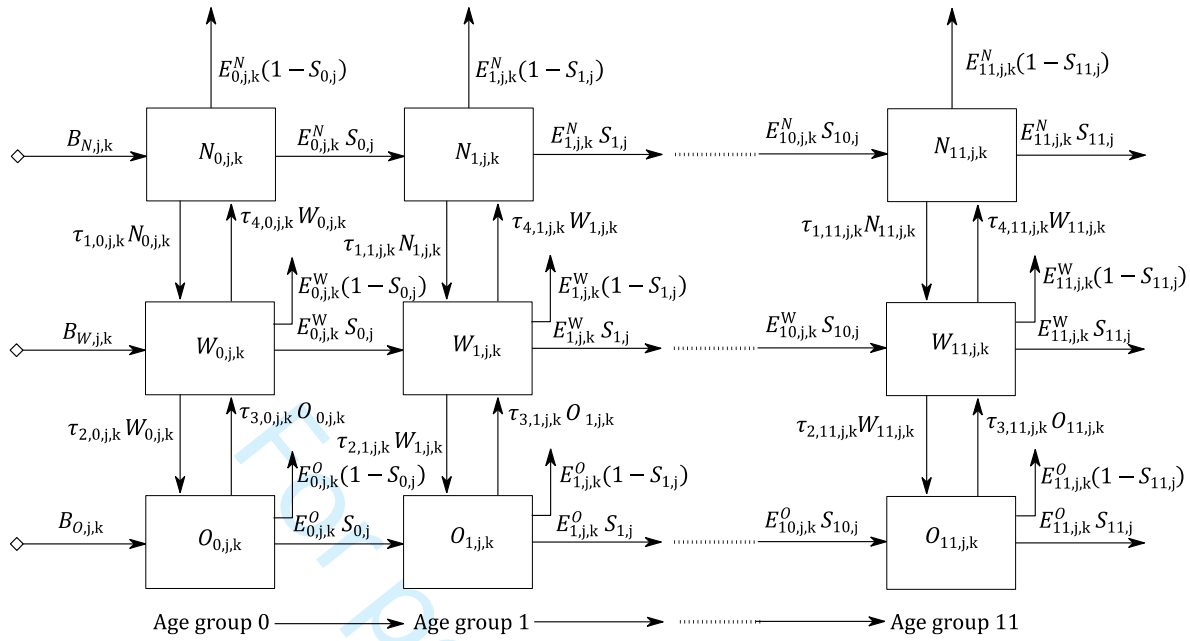

**Figure 1. Overview of the SD model structure at country level.**

The exit rates per year by BMI category, age group  $i$ , gender  $j$ , and SES group  $k$  were modelled using the following equations:

$$E_{0,j,k}^N(t) = \left( \frac{B_{N,j,k}(t) + \tau_{4,0,j,k} W_0(t) - \tau_{1,0,j,k} N_{0,j,k}(t)}{Y} \right) \quad (10)$$

$$E_{0,j,k}^W(t) = \left( \frac{B_{W,j,k}(t) + \tau_{1,0,j,k} N_{0,j,k}(t) + \tau_{3,0,j,k} O_{0,j,k}(t) - W_{0,j,k}(t)(\tau_{2,0,j,k} + \tau_{4,0,j,k})}{Y} \right) \quad (11)$$

$$E_{0,j,k}^O(t) = \left( \frac{B_{O,j,k}(t) + \tau_{2,0,j,k} W_{0,j,k}(t) - \tau_{3,0,j,k} O_{0,j,k}(t)}{Y} \right) \quad (12)$$

$$E_{i,j,k}^N(t) = \left( \frac{E_{i-1,j,k}^N(t) S_{i-1,j} + \tau_{4,i,j,k} W_{i,j,k}(t) - \tau_{1,i,j,k} N_{i,j,k}(t)}{Y} \right) \quad (13)$$

$$E_{i,j,k}^W(t) = \left( \frac{E_{i-1,j,k}^W(t) S_{i-1,j} + \tau_{1,i,j,k} N_{i,j,k}(t) + \tau_{3,i,j,k} O_{i,j,k}(t) - W_{i,j,k}(t)(\tau_{2,i,j,k} + \tau_{4,i,j,k})}{Y} \right) \quad (14)$$

$$E_{i,j,k}^O(t) = \left( \frac{E_{i-1,j,k}^O(t) S_{i-1,j} + \tau_{2,i,j,k} W_{i,j,k}(t) - \tau_{3,i,j,k} O_{i,j,k}(t)}{Y} \right) \quad (15)$$

where  $Y = 5$  years, corresponding to the average time individuals spend in a given age group before maturing into the next age group. Equations (10-12) correspond to the exit rates per year by BMI category for the age group zero to four years. Finally, the survival fraction for each age group  $i$  and gender  $j$  is determined by:

$$S_{i,j} = \exp(R_{i,j}Y) \quad (16)$$

where,  $R_{i,j}$  is the mortality rate (percent per year) for each age group  $i$  and gender  $j$ .

## Section 2. Estimation of transferences rates between nutritional stages by age group, gender, and SES group

We used a heuristic, which was based on previously published research [1,2], to estimate the TRs between nutritional stages by age, gender, and SES using historical data obtained from ENSIN of 2005 and 2010. For the purpose of the model, we assumed that the TRs are uniform within each five-year age group, but differed across age groups. The heuristic differs slightly depending on the level of analysis.

We adapted the heuristic to estimate the TRs using prevalence rates by nutritional stage grouped into age groups of 5 years. The heuristic did not use the prevalence rates by nutritional stage for each year between zero and 59 years to estimate the TRs by nutritional stage in 2010 for each age group, gender, and SES group. Instead, we adapted the heuristic to estimate the TRs by nutritional stage in 2010 using prevalence rates by nutritional stage grouped into age groups of five years. Using these estimates, the heuristic approximates the prevalence rates by nutritional stage in 2010 for each age group  $i$ , gender  $j$ , and SES group  $k$  independently using the following system of equations:

$$P'_{i+1,j,k} = A_{i,j,k} \cdot P_{j,k} \quad (1)$$

where

$$B_{i,j,k} = A_{i,j,k} \cdot (A_{i,j,k} \cdot (A_{i,j,k} \cdot (A_{i,j,k} \cdot A_{i,j,k})));$$

$$A_{i,j,k} = \begin{pmatrix} \alpha_{1,i,j,k} - \tau_{1,i,j,k} & \tau_{4,i,j,k} & 0 \\ \tau_{1,i,j,k} & \alpha_{2,i,j,k} - \tau_{2,i,j,k} - \tau_{4,i,j,k} & \tau_{3,i,j,k} \\ 0 & \tau_{2,i,j,k} & \alpha_{3,i,j,k} - \tau_{3,i,j,k} \end{pmatrix}; P'_{i+1,j,k} = \begin{pmatrix} p'_{N10,i+1,j,k} \\ p'_{W10,i+1,j,k} \\ p'_{O10,i+1,j,k} \end{pmatrix};$$

$$P_{i,j,k} = \begin{pmatrix} P_{N05,i,j,k} \\ P_{W05,i,j,k} \\ P_{O05,i,j,k} \end{pmatrix};$$

where  $i \in (0, \dots, 11)$  represents age groups of five years (0–4, 5–9, ..., 55–59);  $j \in (1, 2)$  represents gender (men and women, respectively);  $k \in (1, 2, 3)$  represents the SES groups (lower, middle, and higher SES., respectively);  $P_{N05,i,j,k}$ ,  $P_{W05,i,j,k}$ , and  $P_{O05,i,j,k}$  are the prevalence rates by nutritional stage in 2005 for age group  $i$ , gender  $j$ , and SES group  $k$ ;  $\alpha_{1,i,j,k}$ ,  $\alpha_{2,i,j,k}$ , and  $\alpha_{3,i,j,k}$  are the retention rates for individuals by nutritional stage, age group  $i$ , gender  $j$  and SES group  $k$ , corresponding to the fraction of individuals who remain in the same nutritional stage between 2005 and 2010;  $\tau_{1,i,j,k}$ ,  $\tau_{2,i,j,k}$ ,  $\tau_{3,i,j,k}$ , and  $\tau_{4,i,j,k}$  are the TRs that are used to run the SD model; and  $P'_{N10,i+1,j,k}$ ,  $P'_{W10,i+1,j,k}$ , and  $P'_{O10,i+1,j,k}$  are the estimated prevalence rates by nutritional stage in 2010 for age group  $i$ , gender  $j$ , and SES group  $k$  five years later. The matrix  $A_{i,j,k}$  represents the equations used to calculate the estimated prevalence rates by nutritional stage in the year  $t+1$  for age group  $i$ , gender  $j$ , and SES group  $k$ , where  $t$  is 2005. The heuristic estimates the TRs aggregated over five years.

Then, the heuristic calculates the TRs by nutritional stage for each age group, gender, and SES group by minimizing the difference between prevalence rates by nutritional stage reported in the 2010 ENSIN and the estimated 2010 prevalence rates informed by data from the 2005 ENSIN. Specifically, the TRs were estimated by solving the system of equations (1) for each age group  $i$ , gender  $j$ , and SES group  $k$  independently, and minimizing the following equation:

$$\begin{aligned} \text{Min } QD_{i,j,k} = & \left[ (P_{N10,i+1,j,k} - p'_{N10,i+1,j,k})^2 + (P_{W10,i+1,j,k} - p'_{W10,i+1,j,k})^2 \right. \\ & \left. + (P_{O10,i+1,j,k} - p'_{O10,i+1,j,k})^2 \right], \quad (2) \end{aligned}$$

with the restrictions

$$\alpha_{1,i,j,k} + \tau_{1,i,j,k} = 1$$

$$\alpha_{2,i,j,k} + \tau_{2,i,j,k} + \tau_{4,i,j,k} = 1$$

$$\alpha_{3,i,j,k} + \tau_{3,i,j,k} = 1 \quad (3)$$

$$0 \leq \alpha_{l,i,j,k} \leq 1, \quad (l = 1, 2, 3)$$

$$0 \leq \tau_{m,i,j,k} \leq 1, \quad (m = 1, 2, 3, 4)$$

where  $P_{N10,i+1,i,j,k}$ ,  $P_{W10,i+1,i,j,k}$ , and  $P_{O10,i+1,i,j,k}$  are the prevalence rates by nutritional stage and age  $i$  in 2010 for age group  $i+1$ , gender  $j$  and SES group  $k$ . At the department level, we did not include gender to estimate the TRs between nutritional stages; the sub index gender is therefore not included. We made these adaptations in the heuristic at the country, regional, and state levels because the ENSIN 2005 and 2010 data could not be used to generate good estimates of TRs by nutritional stage, age group, gender, and SES at the national and subnational level.

### Section 3. Map of Colombia by departments

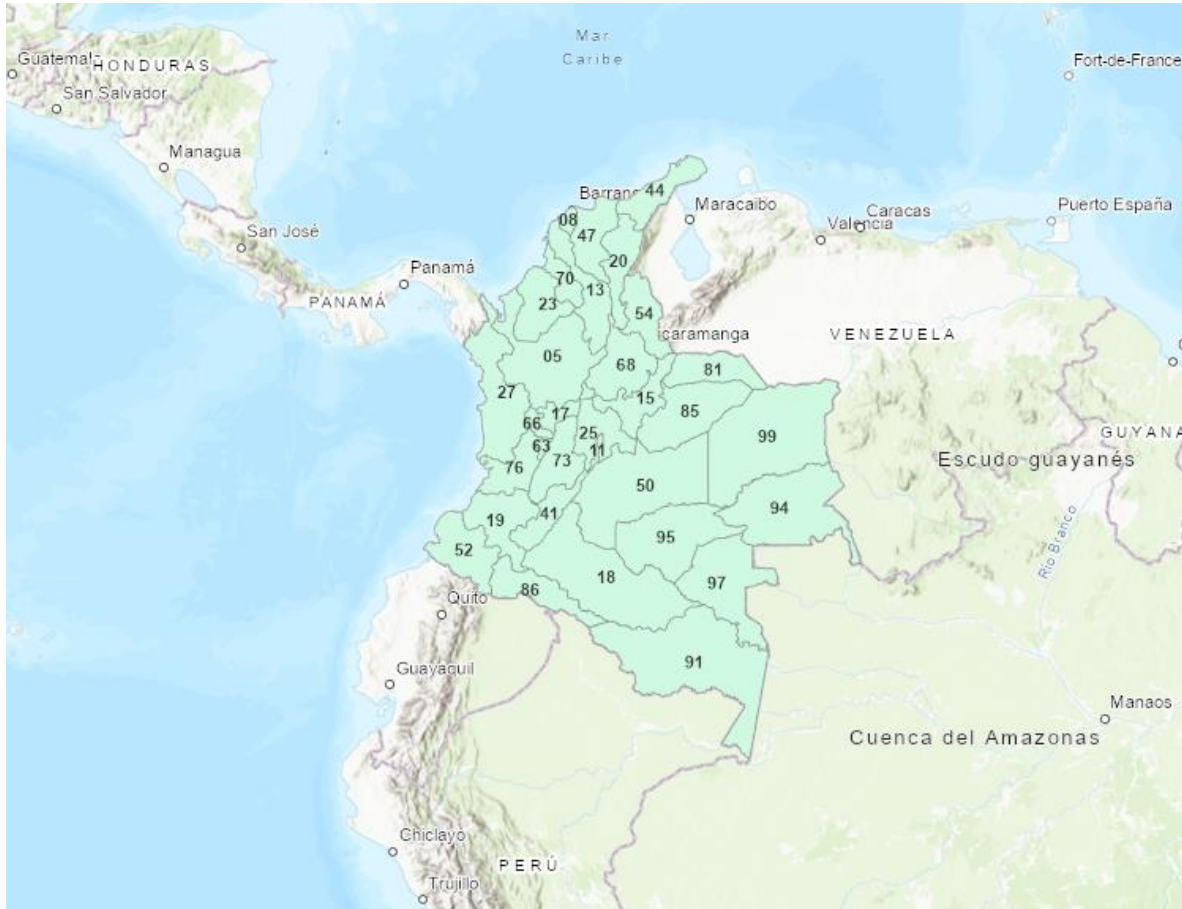

**Figure 2. Map of Colombia by departments [3]. Atlántica region:** 08=Atlántico, 13= Bolívar, 20= Cesar, 23= Córdoba, 44= La Guajira, 47= Magdalena, 70= Sucre, 88= San Andrés; **Oriental región:** 15= Boyacá, 25= Cundinamarca, 50= Meta, 54= Norte de Santander, 68= Santander; **Central región:** 05= Antioquia, 17= Caldas, 18= Caquetá, 41= Huila, 63= Quindío, 66= Risaralda, 73= Tolima; **Pacífica region:** 19= Cauca, 27= Chocó, 52= Nariño, 76= Valle; **Bogotá = 11**; **Orinoquia y Amazonía región:** 81= Arauca, 85= Casanare, 86= Putumayo, 91= Amazonas, 94= Guainía, 95= Guaviare, 97= Vaupés, 99= Vichada. The map was created using ArcGIS online.

## References

- 1 Meisel JD, Sarmiento OL, Olaya C, *et al.* Towards a novel model for studying the nutritional stage dynamics of the Colombian population by age and socioeconomic status. *PLOS ONE* 2018;**13**:e0191929. doi:10.1371/journal.pone.0191929
- 2 Meisel JD, Sarmiento OL, Olaya C, *et al.* A system dynamics model of the nutritional stages of the Colombian population. *Kybernetics* 2016;**45**:554–70. doi:http://dx.doi.org/10.1108/K-01-2015-0010
- 3 DANE - Dirección de Geoestadística - GIT. Map of the Colombia by Departaments. 2019.<https://www.arcgis.com/home/item.html?id=3b869bedc1874c9eacefd03d5beea774> (accessed 9 Mar 2020).
