# Supplementary material for: Using a system dynamics model to study the obesity transition by socioeconomic status in Colombia at the country, regional and department levels
Source: PubMed Central journal article supplement — BMJ Open. 2020 Jun 3;10(6):e036534. doi: 10.1136/bmjopen-2019-036534 (PMC7282389; doi:10.1136/bmjopen-2019-036534), 2020-06-03
Supplement: bmjopen-2019-036534supp001.pdf [file bmjopen-2019-036534supp001.pdf]

**Supplementary Information 1**

**Supplement to: Using a system dynamics model to understand the obesity transition by socioeconomic status in Colombia at the country, regional, and department level.**

**Table of contents**

|                                                                                 |          |
|---------------------------------------------------------------------------------|----------|
| <b>Section 1. Parameters and data used in the model at national level .....</b> | <b>3</b> |
| <b>References .....</b>                                                         | <b>9</b> |

## Section 1. Parameters and data used in the model at national level

The following tables describe the data and parameters used in the two system dynamics (SD) models: SD model of the entire urban population and SD model segregated by socioeconomic status (SES) and to estimate the transference rates (TRs) by age, body mass index (BMI) category, and socioeconomic status (SES) at national level.

**Table 1. Prevalent rates of entire population by age group, gender, and body mass index category in 2005**

| Age Group | Males         |           |         | Females       |           |         |
|-----------|---------------|-----------|---------|---------------|-----------|---------|
|           | Not-Overweigh | Overweigh | Obese   | Not-Overweigh | Overweigh | Obese   |
| 0-4       | 0.76105       | 0.18357   | 0.05537 | 0.76409       | 0.18858   | 0.04733 |
| 5-9       | 0.80877       | 0.13750   | 0.05373 | 0.79520       | 0.15043   | 0.05437 |
| 10-14     | 0.83260       | 0.12485   | 0.04255 | 0.78549       | 0.17204   | 0.04248 |
| 15-19     | 0.89431       | 0.08268   | 0.02301 | 0.79172       | 0.16285   | 0.04543 |
| 20-24     | 0.76938       | 0.18236   | 0.04825 | 0.69604       | 0.22307   | 0.08089 |
| 25-29     | 0.62451       | 0.29679   | 0.07870 | 0.56640       | 0.29998   | 0.13362 |
| 30-34     | 0.50047       | 0.38605   | 0.11349 | 0.45741       | 0.36278   | 0.17981 |
| 35-39     | 0.45259       | 0.40518   | 0.14223 | 0.38965       | 0.39887   | 0.21148 |
| 40-44     | 0.42614       | 0.42564   | 0.14822 | 0.34379       | 0.40650   | 0.24971 |
| 45-49     | 0.39921       | 0.43704   | 0.16375 | 0.28923       | 0.42900   | 0.28178 |
| 50-54     | 0.41231       | 0.42621   | 0.16148 | 0.25499       | 0.41586   | 0.32915 |
| 55-59     | 0.40721       | 0.41261   | 0.18018 | 0.24122       | 0.40478   | 0.35400 |

**Table 2. Prevalent rates of lower socioeconomic status population by age group, gender, and body mass index category in 2005**

| Age Group | Males         |           |         | Females       |           |         |
|-----------|---------------|-----------|---------|---------------|-----------|---------|
|           | Not-Overweigh | Overweigh | Obese   | Not-Overweigh | Overweigh | Obese   |
| 0-4       | 0.78395       | 0.17452   | 0.04153 | 0.80653       | 0.16199   | 0.03148 |
| 5-9       | 0.85783       | 0.11623   | 0.02594 | 0.88696       | 0.09565   | 0.01739 |
| 10-14     | 0.88310       | 0.09725   | 0.01965 | 0.85980       | 0.12157   | 0.01863 |
| 15-19     | 0.94111       | 0.04837   | 0.01052 | 0.81461       | 0.15890   | 0.02648 |
| 20-24     | 0.81901       | 0.14257   | 0.03842 | 0.74058       | 0.20072   | 0.05870 |
| 25-29     | 0.70429       | 0.24785   | 0.04785 | 0.60337       | 0.27862   | 0.11801 |
| 30-34     | 0.58651       | 0.33138   | 0.08211 | 0.52023       | 0.33430   | 0.14547 |
| 35-39     | 0.58167       | 0.33333   | 0.08500 | 0.43189       | 0.36529   | 0.20283 |
| 40-44     | 0.56743       | 0.34326   | 0.08932 | 0.40071       | 0.38526   | 0.21403 |
| 45-49     | 0.52083       | 0.35000   | 0.12917 | 0.33531       | 0.43175   | 0.23294 |
| 50-54     | 0.53915       | 0.35123   | 0.10962 | 0.37478       | 0.36778   | 0.25744 |
| 55-59     | 0.57049       | 0.30492   | 0.12459 | 0.37705       | 0.35597   | 0.26698 |

**Table 3. Prevalent rates of middle socioeconomic status population by age group, gender, and body mass index category in 2005**

| Age Group | Males         |           |         | Females       |           |         |
|-----------|---------------|-----------|---------|---------------|-----------|---------|
|           | Not-Overweigh | Overweigh | Obese   | Not-Overweigh | Overweigh | Obese   |
| 0-4       | 0.74688       | 0.19067   | 0.06245 | 0.77889       | 0.18121   | 0.03990 |
| 5-9       | 0.82955       | 0.12074   | 0.04972 | 0.81805       | 0.12870   | 0.05325 |
| 10-14     | 0.81556       | 0.13689   | 0.04755 | 0.82092       | 0.13725   | 0.04183 |
| 15-19     | 0.88358       | 0.08657   | 0.02985 | 0.82485       | 0.13964   | 0.03550 |
| 20-24     | 0.77792       | 0.18020   | 0.04188 | 0.73680       | 0.19760   | 0.06560 |
| 25-29     | 0.61250       | 0.29306   | 0.09444 | 0.61466       | 0.28448   | 0.10086 |
| 30-34     | 0.50252       | 0.38319   | 0.11429 | 0.46230       | 0.37004   | 0.16766 |
| 35-39     | 0.44158       | 0.41065   | 0.14777 | 0.44085       | 0.35996   | 0.19919 |
| 40-44     | 0.45601       | 0.39856   | 0.14542 | 0.35722       | 0.40728   | 0.23549 |

| Age Group | Males         |           |         | Females       |           |         |
|-----------|---------------|-----------|---------|---------------|-----------|---------|
|           | Not-Overweigh | Overweigh | Obese   | Not-Overweigh | Overweigh | Obese   |
| 45-49     | 0.41702       | 0.41489   | 0.16809 | 0.27633       | 0.43371   | 0.28996 |
| 50-54     | 0.44875       | 0.41274   | 0.13850 | 0.27040       | 0.39520   | 0.33440 |
| 55-59     | 0.38931       | 0.43130   | 0.17939 | 0.28884       | 0.38512   | 0.32604 |

**Table 4. Prevalent rates of higher socioeconomic status population by age group, gender, and body mass index category in 2005**

| Age Group | Males         |           |         | Females       |           |         |
|-----------|---------------|-----------|---------|---------------|-----------|---------|
|           | Not-Overweigh | Overweigh | Obese   | Not-Overweigh | Overweigh | Obese   |
| 0-4       | 0.74297       | 0.18935   | 0.06768 | 0.74901       | 0.19337   | 0.05762 |
| 5-9       | 0.72519       | 0.18066   | 0.09415 | 0.76679       | 0.17827   | 0.05495 |
| 10-14     | 0.78177       | 0.15019   | 0.06804 | 0.78082       | 0.16895   | 0.05023 |
| 15-19     | 0.85472       | 0.11453   | 0.03075 | 0.82160       | 0.14789   | 0.03052 |
| 20-24     | 0.72394       | 0.21580   | 0.06026 | 0.76407       | 0.18831   | 0.04762 |
| 25-29     | 0.56919       | 0.33857   | 0.09225 | 0.66329       | 0.24911   | 0.08760 |
| 30-34     | 0.43184       | 0.43070   | 0.13746 | 0.53989       | 0.31589   | 0.14422 |
| 35-39     | 0.37037       | 0.45139   | 0.17824 | 0.45560       | 0.37591   | 0.16849 |
| 40-44     | 0.31415       | 0.49712   | 0.18872 | 0.39926       | 0.38755   | 0.21319 |
| 45-49     | 0.31790       | 0.50061   | 0.18149 | 0.28693       | 0.42549   | 0.28758 |
| 50-54     | 0.31294       | 0.48080   | 0.20626 | 0.24415       | 0.44150   | 0.31435 |
| 55-59     | 0.32413       | 0.46409   | 0.21179 | 0.23613       | 0.42381   | 0.34006 |

**Table 5. Prevalent rates of entire population by age group, gender, and body mass index category in 2010**

| Age Group | Males         |           |         | Females       |           |         |
|-----------|---------------|-----------|---------|---------------|-----------|---------|
|           | Not-Overweigh | Overweigh | Obese   | Not-Overweigh | Overweigh | Obese   |
| 0-4       | 0.73680       | 0.20456   | 0.05864 | 0.76409       | 0.18858   | 0.04733 |
| 5-9       | 0.76332       | 0.15196   | 0.08472 | 0.79520       | 0.15043   | 0.05437 |
| 10-14     | 0.77794       | 0.15256   | 0.06950 | 0.78549       | 0.17204   | 0.04248 |
| 15-19     | 0.85366       | 0.11398   | 0.03236 | 0.79172       | 0.16285   | 0.04543 |
| 20-24     | 0.73185       | 0.20473   | 0.06342 | 0.69604       | 0.22307   | 0.08089 |
| 25-29     | 0.53510       | 0.34540   | 0.11950 | 0.56640       | 0.29998   | 0.13362 |
| 30-34     | 0.44255       | 0.39099   | 0.16646 | 0.45741       | 0.36278   | 0.17981 |
| 35-39     | 0.39937       | 0.42872   | 0.17191 | 0.38965       | 0.39887   | 0.21148 |
| 40-44     | 0.36702       | 0.44594   | 0.18704 | 0.34379       | 0.40650   | 0.24971 |
| 45-49     | 0.37109       | 0.44759   | 0.18132 | 0.28923       | 0.42900   | 0.28178 |
| 50-54     | 0.36376       | 0.45504   | 0.18120 | 0.25499       | 0.41586   | 0.32915 |
| 55-59     | 0.38500       | 0.43760   | 0.17739 | 0.24122       | 0.40478   | 0.35400 |

**Table 6. Prevalent rates of lower socioeconomic status population by age group, gender, and body mass index category in 2010**

| Age Group | Males         |           |         | Females       |           |         |
|-----------|---------------|-----------|---------|---------------|-----------|---------|
|           | Not-Overweigh | Overweigh | Obese   | Not-Overweigh | Overweigh | Obese   |
| 0-4       | 0.73872       | 0.21008   | 0.05120 | 0.76813       | 0.18952   | 0.04235 |
| 5-9       | 0.81081       | 0.13745   | 0.05174 | 0.84693       | 0.11389   | 0.03918 |
| 10-14     | 0.83917       | 0.11708   | 0.04375 | 0.81566       | 0.14739   | 0.03695 |
| 15-19     | 0.88342       | 0.09347   | 0.02312 | 0.78310       | 0.17442   | 0.04248 |
| 20-24     | 0.76115       | 0.17639   | 0.06246 | 0.66899       | 0.23826   | 0.09275 |
| 25-29     | 0.56088       | 0.33523   | 0.10390 | 0.52527       | 0.31441   | 0.16032 |
| 30-34     | 0.50181       | 0.35481   | 0.14338 | 0.40909       | 0.37216   | 0.21875 |
| 35-39     | 0.46410       | 0.37565   | 0.16025 | 0.36917       | 0.39763   | 0.23320 |
| 40-44     | 0.41073       | 0.42059   | 0.16867 | 0.32658       | 0.39517   | 0.27825 |
| 45-49     | 0.45012       | 0.39549   | 0.15439 | 0.29107       | 0.39097   | 0.31796 |
| 50-54     | 0.45231       | 0.39740   | 0.15029 | 0.27503       | 0.40484   | 0.32013 |
| 55-59     | 0.47929       | 0.39842   | 0.12229 | 0.28418       | 0.38556   | 0.33026 |

**Table 7. Prevalent rates of middle socioeconomic status population by age group, gender, and body mass index category in 2010**

| Age Group | Males         |           |         | Females       |           |         |
|-----------|---------------|-----------|---------|---------------|-----------|---------|
|           | Not-Overweigh | Overweigh | Obese   | Not-Overweigh | Overweigh | Obese   |
| 0-4       | 0.74826       | 0.19360   | 0.05814 | 0.77592       | 0.18416   | 0.03992 |
| 5-9       | 0.76653       | 0.15307   | 0.08041 | 0.79742       | 0.14988   | 0.05269 |
| 10-14     | 0.78466       | 0.15682   | 0.05852 | 0.78575       | 0.17370   | 0.04055 |
| 15-19     | 0.85288       | 0.11458   | 0.03254 | 0.80732       | 0.14946   | 0.04322 |
| 20-24     | 0.74719       | 0.19654   | 0.05628 | 0.69790       | 0.22132   | 0.08079 |
| 25-29     | 0.55112       | 0.32522   | 0.12366 | 0.57692       | 0.29487   | 0.12821 |
| 30-34     | 0.44526       | 0.38421   | 0.17053 | 0.45881       | 0.36490   | 0.17629 |
| 35-39     | 0.39230       | 0.45608   | 0.15162 | 0.38689       | 0.37377   | 0.23934 |
| 40-44     | 0.37437       | 0.42839   | 0.19724 | 0.35059       | 0.38285   | 0.26655 |
| 45-49     | 0.37736       | 0.45687   | 0.16577 | 0.27349       | 0.42326   | 0.30326 |
| 50-54     | 0.38679       | 0.43962   | 0.17358 | 0.25197       | 0.38583   | 0.36220 |
| 55-59     | 0.39286       | 0.42634   | 0.18080 | 0.24806       | 0.37209   | 0.37984 |

**Table 8. Prevalent rates of higher socioeconomic status population by age group, gender, and body mass index category in 2010**

| Age Group | Males         |           |         | Females       |           |         |
|-----------|---------------|-----------|---------|---------------|-----------|---------|
|           | Not-Overweigh | Overweigh | Obese   | Not-Overweigh | Overweigh | Obese   |
| 0-4       | 0.72199       | 0.20775   | 0.07026 | 0.74656       | 0.19149   | 0.06195 |
| 5-9       | 0.69791       | 0.17015   | 0.13194 | 0.72241       | 0.20088   | 0.07671 |
| 10-14     | 0.70526       | 0.18810   | 0.10664 | 0.75157       | 0.19821   | 0.05022 |
| 15-19     | 0.82515       | 0.13360   | 0.04126 | 0.78875       | 0.16144   | 0.04981 |
| 20-24     | 0.69251       | 0.23779   | 0.06971 | 0.71908       | 0.21069   | 0.07023 |
| 25-29     | 0.49887       | 0.37040   | 0.13073 | 0.59451       | 0.29121   | 0.11429 |
| 30-34     | 0.38442       | 0.43065   | 0.18493 | 0.49567       | 0.35355   | 0.15078 |
| 35-39     | 0.34673       | 0.45514   | 0.19813 | 0.40641       | 0.41729   | 0.17630 |
| 40-44     | 0.33097       | 0.47518   | 0.19385 | 0.35115       | 0.42872   | 0.22013 |
| 45-49     | 0.30837       | 0.48018   | 0.21145 | 0.29707       | 0.45293   | 0.25000 |
| 50-54     | 0.28793       | 0.50464   | 0.20743 | 0.24590       | 0.43735   | 0.31674 |
| 55-59     | 0.32332       | 0.46755   | 0.20913 | 0.21780       | 0.42909   | 0.35311 |

**Table 9. Fraction of births by body mass index category, gender, and socioeconomic status<sup>†</sup>**

| Population Group (%/year) | Males         |           |       | Females       |           |       |
|---------------------------|---------------|-----------|-------|---------------|-----------|-------|
|                           | Not-Overweigh | Overweigh | Obese | Not-Overweigh | Overweigh | Obese |
| Lower SES                 | 82.26         | 12.60     | 5.14  | 82.26         | 12.60     | 5.14  |
| Middle SES                | 77.87         | 13.11     | 9.02  | 77.87         | 13.11     | 9.02  |
| Higher SES                | 77.90         | 16.67     | 5.43  | 77.90         | 16.67     | 5.43  |
| Complete Urban Population | 79.76         | 13.97     | 6.27  | 79.76         | 13.97     | 6.27  |

<sup>†</sup> The fractions of births by each BMI category correspond to the prevalences by BMI category of children aged 0 to 12 months

**Table 10. Man mortality rates and population size by age group without segregate by socioeconomic status<sup>†</sup>**

| Age group | Mortality rates (R) (%/year) | Not- overweight men in 2005 (Number of people) <sup>1</sup> | Overweight men in 2005 (Number of people) <sup>2</sup> | Obese men in 2005 (Number of people) <sup>3</sup> |
|-----------|------------------------------|-------------------------------------------------------------|--------------------------------------------------------|---------------------------------------------------|
| 0-4       | 0,00357                      | 1165482                                                     | 281127                                                 | 84801                                             |
| 5-9       | 0,00032                      | 1289072                                                     | 219149                                                 | 85644                                             |
| 10-14     | 0,00033                      | 1359604                                                     | 203875                                                 | 69488                                             |
| 15-19     | 0,00155                      | 1374888                                                     | 127116                                                 | 35377                                             |
| 20-24     | 0,00293                      | 1058824                                                     | 250967                                                 | 66405                                             |
| 25-29     | 0,00305                      | 771818                                                      | 366795                                                 | 97264                                             |
| 30-34     | 0,00296                      | 541980                                                      | 418070                                                 | 122902                                            |
| 35-39     | 0,00284                      | 489080                                                      | 437848                                                 | 153696                                            |
| 40-44     | 0,00310                      | 436635                                                      | 436122                                                 | 151873                                            |
| 45-49     | 0,00384                      | 337634                                                      | 369630                                                 | 138492                                            |
| 50-54     | 0,00574                      | 276901                                                      | 286235                                                 | 108449                                            |
| 55-59     | 0,00798                      | 210765                                                      | 213563                                                 | 93259                                             |

<sup>†</sup>Values used in this table are for the urban population

<sup>1</sup> Initial value used in the stock of not-overweight population in 2005.

<sup>2</sup> Initial value used in the stock of overweight population in 2005.

<sup>3</sup> Initial value used in the stock of obese population in 2005.

**Table 11. Women mortality rates and population size by age group without segregate by socioeconomic status<sup>†</sup>**

| Age group | Mortality rates (R) (%/year) | Not- overweight women in 2005 (Number of people) <sup>1</sup> | Overweight women in 2005 (Number of people) <sup>2</sup> | Obese women in 2005 (Number of people) <sup>3</sup> |
|-----------|------------------------------|---------------------------------------------------------------|----------------------------------------------------------|-----------------------------------------------------|
| 0-4       | 0,00289                      | 1126474                                                       | 278023                                                   | 69772                                               |
| 5-9       | 0,00023                      | 1227412                                                       | 232199                                                   | 83921                                               |
| 10-14     | 0,00024                      | 1244635                                                       | 272604                                                   | 67304                                               |
| 15-19     | 0,00049                      | 1219614                                                       | 250871                                                   | 69976                                               |
| 20-24     | 0,00066                      | 1026858                                                       | 329092                                                   | 119328                                              |
| 25-29     | 0,00065                      | 762616                                                        | 403902                                                   | 179915                                              |
| 30-34     | 0,00085                      | 552648                                                        | 438307                                                   | 217248                                              |
| 35-39     | 0,00107                      | 480958                                                        | 492333                                                   | 261042                                              |
| 40-44     | 0,00146                      | 403077                                                        | 476607                                                   | 292781                                              |
| 45-49     | 0,00218                      | 285037                                                        | 422785                                                   | 277697                                              |
| 50-54     | 0,00337                      | 199382                                                        | 325166                                                   | 257368                                              |
| 55-59     | 0,00523                      | 146397                                                        | 245658                                                   | 214837                                              |

<sup>†</sup>Values used in this table are for the urban population

<sup>1</sup> Initial value used in the stock of not-overweight population in 2005.

<sup>2</sup> Initial value used in the stock of overweight population in 2005.

<sup>3</sup> Initial value used in the stock of obese population in 2005.

**Table 12. Man mortality rates and population size by age group for the lower socioeconomic status population<sup>†</sup>**

| Age group | Mortality rates (R) (%/year) | Not- overweight men in 2005 (Number of people) <sup>1</sup> | Overweight men in 2005 (Number of people) <sup>2</sup> | Obese men in 2005 (Number of people) <sup>3</sup> |
|-----------|------------------------------|-------------------------------------------------------------|--------------------------------------------------------|---------------------------------------------------|
| 0-4       | 0,00357                      | 497762                                                      | 110812                                                 | 26367                                             |
| 5-9       | 0,00032                      | 562355                                                      | 76198                                                  | 17003                                             |
| 10-14     | 0,00033                      | 589337                                                      | 64899                                                  | 13111                                             |
| 15-19     | 0,00155                      | 536644                                                      | 27582                                                  | 5996                                              |
| 20-24     | 0,00293                      | 370955                                                      | 64574                                                  | 17403                                             |
| 25-29     | 0,00305                      | 277758                                                      | 97748                                                  | 18872                                             |
| 30-34     | 0,00296                      | 201479                                                      | 113836                                                 | 28207                                             |
| 35-39     | 0,00284                      | 184329                                                      | 105633                                                 | 26936                                             |

|       |         |        |        |       |
|-------|---------|--------|--------|-------|
| 40-44 | 0,00310 | 166239 | 100565 | 26167 |
| 45-49 | 0,00384 | 119390 | 80230  | 29609 |
| 50-54 | 0,00574 | 107116 | 69781  | 21779 |
| 55-59 | 0,00798 | 497762 | 110812 | 26367 |

†Values used in this table are for the urban population

<sup>1</sup> Initial value used in the stock of not-overweight population in 2005 for lower SES.

<sup>2</sup> Initial value used in the stock of overweight population in 2005 for lower SES.

<sup>3</sup> Initial value used in the stock of obese population in 2005 for lower SES.

**Table 13. Women mortality rates and population size by age group for the lower socioeconomic status population<sup>†</sup>**

| Age group | Mortality rates (R) (%/year) | Not- overweight women in 2005 (Number of people) <sup>1</sup> | Overweight women in 2005 (Number of people) <sup>2</sup> | Obese women in 2005 (Number of people) <sup>3</sup> |
|-----------|------------------------------|---------------------------------------------------------------|----------------------------------------------------------|-----------------------------------------------------|
| 0-4       | 0,00289                      | 492988                                                        | 99017                                                    | 19244                                               |
| 5-9       | 0,00023                      | 563089                                                        | 60725                                                    | 11041                                               |
| 10-14     | 0,00024                      | 556772                                                        | 78723                                                    | 12062                                               |
| 15-19     | 0,00049                      | 465440                                                        | 90792                                                    | 15132                                               |
| 20-24     | 0,00066                      | 359582                                                        | 97460                                                    | 28499                                               |
| 25-29     | 0,00065                      | 259242                                                        | 119709                                                   | 50705                                               |
| 30-34     | 0,00085                      | 199380                                                        | 128120                                                   | 55753                                               |
| 35-39     | 0,00107                      | 156332                                                        | 132225                                                   | 73418                                               |
| 40-44     | 0,00146                      | 134336                                                        | 129154                                                   | 71752                                               |
| 45-49     | 0,00218                      | 89565                                                         | 115324                                                   | 62220                                               |
| 50-54     | 0,00337                      | 86692                                                         | 85072                                                    | 59550                                               |
| 55-59     | 0,00523                      | 62876                                                         | 59361                                                    | 44521                                               |

†Values used in this table are for the urban population

<sup>1</sup> Initial value used in the stock of not-overweight population in 2005 for lower SES.

<sup>2</sup> Initial value used in the stock of overweight population in 2005 for lower SES.

<sup>3</sup> Initial value used in the stock of obese population in 2005 for lower SES.

**Table 14. Man mortality rates and population size by age group for the middle socioeconomic status population<sup>†</sup>**

| Age group | Mortality rates (R) (%/year) | Not- overweight men in 2005 (Number of people) <sup>1</sup> | Overweight men in 2005 (Number of people) <sup>2</sup> | Obese men in 2005 (Number of people) <sup>3</sup> |
|-----------|------------------------------|-------------------------------------------------------------|--------------------------------------------------------|---------------------------------------------------|
| 0-4       | 0,00357                      | 319608                                                      | 81594                                                  | 26723                                             |
| 5-9       | 0,00032                      | 367767                                                      | 53528                                                  | 22041                                             |
| 10-14     | 0,00033                      | 371039                                                      | 62277                                                  | 21633                                             |
| 15-19     | 0,00155                      | 354964                                                      | 34777                                                  | 11992                                             |
| 20-24     | 0,00293                      | 280735                                                      | 65032                                                  | 15113                                             |
| 25-29     | 0,00305                      | 213399                                                      | 102103                                                 | 32905                                             |
| 30-34     | 0,00296                      | 150606                                                      | 114843                                                 | 34252                                             |
| 35-39     | 0,00284                      | 135738                                                      | 126231                                                 | 45422                                             |
| 40-44     | 0,00310                      | 130323                                                      | 113905                                                 | 41560                                             |
| 45-49     | 0,00384                      | 93601                                                       | 93124                                                  | 37727                                             |
| 50-54     | 0,00574                      | 72003                                                       | 66225                                                  | 22223                                             |
| 55-59     | 0,00798                      | 47562                                                       | 52691                                                  | 21916                                             |

†Values used in this table are for the urban population

<sup>1</sup> Initial value used in the stock of not-overweight population in 2005 for middle SES.

<sup>2</sup> Initial value used in the stock of overweight population in 2005 for middle SES.

<sup>3</sup> Initial value used in the stock of obese population in 2005 for middle SES.

**Table 15. Women mortality rates and population size by age group for the middle socioeconomic status population<sup>†</sup>**

| Age group | Mortality rates (R) (%/year) | Not- overweight women in 2005 (Number of people) <sup>1</sup> | Overweight women in 2005 (Number of people) <sup>2</sup> | Obese women in 2005 (Number of people) <sup>3</sup> |
|-----------|------------------------------|---------------------------------------------------------------|----------------------------------------------------------|-----------------------------------------------------|
| 0-4       | 0,00289                      | 320869                                                        | 74652                                                    | 16437                                               |
| 5-9       | 0,00023                      | 351216                                                        | 55255                                                    | 22864                                               |
| 10-14     | 0,00024                      | 362400                                                        | 60592                                                    | 18466                                               |
| 15-19     | 0,00049                      | 332035                                                        | 56212                                                    | 14291                                               |
| 20-24     | 0,00066                      | 285040                                                        | 76444                                                    | 25378                                               |
| 25-29     | 0,00065                      | 233307                                                        | 107982                                                   | 38285                                               |
| 30-34     | 0,00085                      | 154577                                                        | 123728                                                   | 56059                                               |
| 35-39     | 0,00107                      | 154789                                                        | 126387                                                   | 69939                                               |
| 40-44     | 0,00146                      | 116820                                                        | 133190                                                   | 77012                                               |
| 45-49     | 0,00218                      | 72273                                                         | 113433                                                   | 75838                                               |
| 50-54     | 0,00337                      | 50514                                                         | 73828                                                    | 62470                                               |
| 55-59     | 0,00523                      | 41376                                                         | 55168                                                    | 46705                                               |

<sup>†</sup>Values used in this table are for the urban population

<sup>1</sup> Initial value used in the stock of not-overweight population in 2005 for middle SES.

<sup>2</sup> Initial value used in the stock of overweight population in 2005 for middle SES.

<sup>3</sup> Initial value used in the stock of obese population in 2005 for middle SES.

**Table 16. Man mortality rates and population size by age group for the higher socioeconomic status population<sup>†</sup>**

| Age group | Mortality rates (R) (%/year) | Not- overweight men in 2005 (Number of people) <sup>1</sup> | Overweight men in 2005 (Number of people) <sup>2</sup> | Obese men in 2005 (Number of people) <sup>3</sup> |
|-----------|------------------------------|-------------------------------------------------------------|--------------------------------------------------------|---------------------------------------------------|
| 0-4       | 0,00357                      | 348113                                                      | 88721                                                  | 31711                                             |
| 5-9       | 0,00032                      | 358950                                                      | 89423                                                  | 46601                                             |
| 10-14     | 0,00033                      | 399228                                                      | 76699                                                  | 34744                                             |
| 15-19     | 0,00155                      | 483279                                                      | 64757                                                  | 17388                                             |
| 20-24     | 0,00293                      | 407134                                                      | 121362                                                 | 33890                                             |
| 25-29     | 0,00305                      | 280661                                                      | 166945                                                 | 45486                                             |
| 30-34     | 0,00296                      | 189894                                                      | 189391                                                 | 60444                                             |
| 35-39     | 0,00284                      | 169012                                                      | 205984                                                 | 81337                                             |
| 40-44     | 0,00310                      | 140072                                                      | 221653                                                 | 84146                                             |
| 45-49     | 0,00384                      | 124643                                                      | 196277                                                 | 71156                                             |
| 50-54     | 0,00574                      | 97782                                                       | 150229                                                 | 64447                                             |
| 55-59     | 0,00798                      | 82068                                                       | 117506                                                 | 53624                                             |

<sup>†</sup>Values used in this table are for the urban population

<sup>1</sup> Initial value used in the stock of not-overweight population in 2005 for higher SES.

<sup>2</sup> Initial value used in the stock of overweight population in 2005 for higher SES.

<sup>3</sup> Initial value used in the stock of obese population in 2005 for higher SES.

**Table 17. Women mortality rates and population size by age group for the higher socioeconomic status population<sup>†</sup>**

| Age group | Mortality rates (R) (%/year) | Not- overweight women in 2005 (Number of people) <sup>1</sup> | Overweight women in 2005 (Number of people) <sup>2</sup> | Obese women in 2005 (Number of people) <sup>3</sup> |
|-----------|------------------------------|---------------------------------------------------------------|----------------------------------------------------------|-----------------------------------------------------|
| 0-4       | 0,00289                      | 337851                                                        | 87222                                                    | 25989                                               |
| 5-9       | 0,00023                      | 367555                                                        | 85451                                                    | 26338                                               |
| 10-14     | 0,00024                      | 386919                                                        | 83719                                                    | 24890                                               |
| 15-19     | 0,00049                      | 465482                                                        | 83787                                                    | 17289                                               |
| 20-24     | 0,00066                      | 460639                                                        | 113529                                                   | 28708                                               |
| 25-29     | 0,00065                      | 356321                                                        | 133820                                                   | 47061                                               |



|              |         |        |        |        |
|--------------|---------|--------|--------|--------|
| <b>30-34</b> | 0,00085 | 264860 | 154972 | 70755  |
| <b>35-39</b> | 0,00107 | 237476 | 195942 | 87825  |
| <b>40-44</b> | 0,00146 | 203703 | 197731 | 108768 |
| <b>45-49</b> | 0,00218 | 131088 | 194393 | 131387 |
| <b>50-54</b> | 0,00337 | 88819  | 160613 | 114358 |
| <b>55-59</b> | 0,00523 | 70102  | 125824 | 100959 |

†Values used in this table are for the urban population

<sup>1</sup> Initial value used in the stock of not-overweight population in 2005 for higher SES.

<sup>2</sup> Initial value used in the stock of overweight population in 2005 for higher SES.

<sup>3</sup> Initial value used in the stock of obese population in 2005 for higher SES.

**Table 18. Data and projections of the Fertility rates†**

| Year | Fertility rate | Year | Fertility rate | Year | Fertility rate |
|------|----------------|------|----------------|------|----------------|
| 1960 | 6.807          | 1985 | 3.420          | 2010 | 2.010          |
| 1961 | 6.801          | 1986 | 3.320          | 2011 | 1.978          |
| 1962 | 6.779          | 1987 | 3.227          | 2012 | 1.948          |
| 1963 | 6.736          | 1988 | 3.142          | 2013 | 1.921          |
| 1964 | 6.668          | 1989 | 3.065          | 2014 | 1.897          |
| 1965 | 6.567          | 1990 | 2.994          | 2015 | 1.874          |
| 1966 | 6.425          | 1991 | 2.927          | 2016 | 1.851          |
| 1967 | 6.246          | 1992 | 2.860          | 2017 | 1.828          |
| 1968 | 6.034          | 1993 | 2.794          | 2018 | 1.805          |
| 1969 | 5.797          | 1994 | 2.727          | 2019 | 1.782          |
| 1970 | 5.548          | 1995 | 2.660          | 2020 | 1.759          |
| 1971 | 5.300          | 1996 | 2.596          | 2021 | 1.736          |
| 1972 | 5.067          | 1997 | 2.535          | 2022 | 1.713          |
| 1973 | 4.857          | 1998 | 2.481          | 2023 | 1.690          |
| 1974 | 4.675          | 1999 | 2.432          | 2024 | 1.667          |
| 1975 | 4.523          | 2000 | 2.389          | 2025 | 1.644          |
| 1976 | 4.396          | 2001 | 2.349          | 2026 | 1.621          |
| 1977 | 4.284          | 2002 | 2.311          | 2027 | 1.598          |
| 1978 | 4.177          | 2003 | 2.274          | 2028 | 1.575          |
| 1979 | 4.071          | 2004 | 2.236          | 2029 | 1.552          |
| 1980 | 3.965          | 2005 | 2.197          | 2030 | 1.529          |
| 1981 | 3.855          | 2006 | 2.157          |      |                |
| 1982 | 3.744          | 2007 | 2.118          |      |                |
| 1983 | 3.634          | 2008 | 2.080          |      |                |
| 1984 | 3.526          | 2009 | 2.044          |      |                |

†Data of Fertility rate of world Data Bank(1960–2015)[1] was used to forecast the fertility rate from 2015 to 2030. Holt-Winters no seasonal method in EVIEWS 5 (Quantitative Micro Software, LLC) was used to forecast the fertility rate. In the SD model we used data from 2005 to 2030.

## References

- 1 World Data Bank. World Development Indicators. <http://databank.worldbank.org/data/reports.aspx?source=World%20Development%20Indicators> (accessed 22 Aug 2019).
