# Supplementary material for: Using a system dynamics model to study the obesity transition by socioeconomic status in Colombia at the country, regional and department levels
Source: PubMed Central journal article supplement — BMJ Open. 2020 Jun 3;10(6):e036534. doi: 10.1136/bmjopen-2019-036534 (PMC7282389; doi:10.1136/bmjopen-2019-036534), 2020-06-03
Supplement: bmjopen-2019-036534supp002.pdf [file bmjopen-2019-036534supp002.pdf]

**Supplementary Information 2**

**Supplement to: Using a system dynamics model to Uunderstand the obesity transition by socioeconomic status in Colombia at the country, regional, and department level.**

## Table of contents

|                                                                                                |     |
|------------------------------------------------------------------------------------------------|-----|
| <b>Section 1. Parameters and data used in the model at regional and department level</b> ..... | 3   |
| <b>1.1 Caribe region</b> .....                                                                 | 3   |
| <b>1.1.1 Data and model parameters used</b> .....                                              | 3   |
| <b>1.2 Oriental region</b> .....                                                               | 30  |
| <b>1.2.1 Data and model parameters used</b> .....                                              | 30  |
| <b>1.3 Central region</b> .....                                                                | 50  |
| <b>1.3.1 Data and model parameters used</b> .....                                              | 50  |
| <b>1.4 Pacifica Region</b> .....                                                               | 75  |
| <b>1.4.1 Data and model parameters used</b> .....                                              | 75  |
| <b>1.5 Bogotá</b> .....                                                                        | 93  |
| <b>1.5.1 Data and model parameters used</b> .....                                              | 93  |
| <b>1.6 Orinoquia y Amazonia region</b> .....                                                   | 100 |
| <b>1.6.1 Data and model parameters used</b> .....                                              | 100 |
| <b>References</b> .....                                                                        | 124 |

## Section 1. Parameters and data used in the model at regional and department level

The following tables describe the data and parameters used in the two system dynamics (SD) models: SD model of the entire urban population and SD model segregated by socioeconomic status (SES) and to estimate the transference rates (TRs) by age, body mass index (BMI) category, and socioeconomic status (SES) at regional and department level.

### 1.1 Caribe region

The Caribbean region of Colombia is located in the north-western area of the national territory and consists of eight departments and the island region of San Andres, the departments are:

- Atlántico (08)
- Bolívar (13)
- Cesar (20)
- Córdoba (23)
- La Guajira (44)
- Magdalena (47)
- Sucre (70)
- San Andrés (88)

#### 1.1.1 Data and model parameters used

**Table 1. Prevalent rates of entire population by age group, gender, and body mass index category in 2005 (Caribe region)**

| Age Group | Nutritional State Males |           |         | Nutritional State Females |           |         |
|-----------|-------------------------|-----------|---------|---------------------------|-----------|---------|
|           | Not-Overweigh           | Overweigh | Obese   | Not-Overweigh             | Overweigh | Obese   |
| 0-4       | 0,74780                 | 0,20256   | 0,04964 | 0,80065                   | 0,16436   | 0,03499 |
| 5-9       | 0,83481                 | 0,10835   | 0,05684 | 0,84971                   | 0,11753   | 0,03276 |
| 10-14     | 0,87175                 | 0,09359   | 0,03466 | 0,85540                   | 0,12544   | 0,01916 |
| 15-19     | 0,90159                 | 0,07381   | 0,02460 | 0,85434                   | 0,12254   | 0,02312 |
| 20-24     | 0,76897                 | 0,18527   | 0,04576 | 0,78406                   | 0,16718   | 0,04876 |
| 25-29     | 0,63319                 | 0,28312   | 0,08368 | 0,64600                   | 0,25427   | 0,09973 |
| 30-34     | 0,50084                 | 0,38526   | 0,11390 | 0,51341                   | 0,33764   | 0,14896 |
| 35-39     | 0,46274                 | 0,39168   | 0,14558 | 0,47688                   | 0,35046   | 0,17266 |
| 40-44     | 0,45455                 | 0,40074   | 0,14471 | 0,41704                   | 0,38164   | 0,20133 |
| 45-49     | 0,42549                 | 0,39957   | 0,17495 | 0,32316                   | 0,42621   | 0,25064 |
| 50-54     | 0,46341                 | 0,35501   | 0,18157 | 0,33382                   | 0,38653   | 0,27965 |
| 55-59     | 0,45779                 | 0,37338   | 0,16883 | 0,33589                   | 0,38772   | 0,27639 |

**Table 2. Prevalent rates of lower socioeconomic status population by age group, gender, and body mass index category in 2005 (Caribe region)**

| Age Group | Nutritional State Males |           |         | Nutritional State Females |           |         |
|-----------|-------------------------|-----------|---------|---------------------------|-----------|---------|
|           | Not-Overweigh           | Overweigh | Obese   | Not-Overweigh             | Overweigh | Obese   |
| 0-4       | 0,76609                 | 0,20251   | 0,03140 | 0,83223                   | 0,14784   | 0,01993 |
| 5-9       | 0,90942                 | 0,06884   | 0,02174 | 0,90040                   | 0,08765   | 0,01195 |
| 10-14     | 0,92193                 | 0,06320   | 0,01487 | 0,90164                   | 0,08607   | 0,01230 |
| 15-19     | 0,95738                 | 0,04262   | 0,00000 | 0,86782                   | 0,10920   | 0,02299 |
| 20-24     | 0,83469                 | 0,13008   | 0,03523 | 0,78330                   | 0,17097   | 0,04573 |
| 25-29     | 0,70874                 | 0,24919   | 0,04207 | 0,65051                   | 0,25765   | 0,09184 |
| 30-34     | 0,63178                 | 0,29070   | 0,07752 | 0,55585                   | 0,30319   | 0,14096 |
| 35-39     | 0,57391                 | 0,34783   | 0,07826 | 0,48997                   | 0,33524   | 0,17479 |
| 40-44     | 0,58209                 | 0,32836   | 0,08955 | 0,48693                   | 0,34314   | 0,16993 |
| 45-49     | 0,57143                 | 0,32298   | 0,10559 | 0,36965                   | 0,40467   | 0,22568 |
| 50-54     | 0,58974                 | 0,29487   | 0,11538 | 0,44907                   | 0,33796   | 0,21296 |
| 55-59     | 0,62376                 | 0,24752   | 0,12871 | 0,48810                   | 0,30357   | 0,20833 |

**Table 3. Prevalent rates of middle socioeconomic status population by age group, gender, and body mass index category in 2005 (Caribe region)**

| Age Group | Nutritional State Males |           |         | Nutritional State Females |           |         |
|-----------|-------------------------|-----------|---------|---------------------------|-----------|---------|
|           | Not-Overweigh           | Overweigh | Obese   | Not-Overweigh             | Overweigh | Obese   |
| 0-4       | 0,72063                 | 0,22540   | 0,05397 | 0,77982                   | 0,17737   | 0,04281 |
| 5-9       | 0,86000                 | 0,09333   | 0,04667 | 0,82550                   | 0,10738   | 0,06711 |
| 10-14     | 0,87975                 | 0,08228   | 0,03797 | 0,86127                   | 0,13295   | 0,00578 |
| 15-19     | 0,88710                 | 0,05376   | 0,05914 | 0,84375                   | 0,12946   | 0,02679 |
| 20-24     | 0,79583                 | 0,17500   | 0,02917 | 0,79063                   | 0,16529   | 0,04408 |
| 25-29     | 0,63902                 | 0,27805   | 0,08293 | 0,62145                   | 0,25237   | 0,12618 |
| 30-34     | 0,44156                 | 0,44805   | 0,11039 | 0,51389                   | 0,35069   | 0,13542 |
| 35-39     | 0,43671                 | 0,37975   | 0,18354 | 0,48814                   | 0,34576   | 0,16610 |
| 40-44     | 0,45399                 | 0,39264   | 0,15337 | 0,37209                   | 0,43023   | 0,19767 |
| 45-49     | 0,39370                 | 0,37795   | 0,22835 | 0,31050                   | 0,45662   | 0,23288 |
| 50-54     | 0,49398                 | 0,31325   | 0,19277 | 0,33500                   | 0,39500   | 0,27000 |
| 55-59     | 0,45977                 | 0,39080   | 0,14943 | 0,30534                   | 0,38931   | 0,30534 |

**Table 4. Prevalent rates of higher socioeconomic status population by age group, gender, and body mass index category in 2005 (Caribe region)**

| Age Group | Nutritional State Males |           |         | Nutritional State Females |           |         |
|-----------|-------------------------|-----------|---------|---------------------------|-----------|---------|
|           | Not-Overweigh           | Overweigh | Obese   | Not-Overweigh             | Overweigh | Obese   |
| 0-4       | 0.73737                 | 0.17845   | 0.08418 | 0.76000                   | 0.18333   | 0.05667 |
| 5-9       | 0.65693                 | 0.20438   | 0.13869 | 0.77311                   | 0.19328   | 0.03361 |
| 10-14     | 0.77333                 | 0.16000   | 0.06667 | 0.77707                   | 0.17834   | 0.04459 |
| 15-19     | 0.83000                 | 0.14000   | 0.03000 | 0.84642                   | 0.13311   | 0.02048 |
| 20-24     | 0.66202                 | 0.26481   | 0.07317 | 0.77934                   | 0.16432   | 0.05634 |
| 25-29     | 0.51232                 | 0.33990   | 0.14778 | 0.66089                   | 0.25248   | 0.08663 |
| 30-34     | 0.36757                 | 0.46486   | 0.16757 | 0.46647                   | 0.36443   | 0.16910 |
| 35-39     | 0.34921                 | 0.45503   | 0.19577 | 0.45289                   | 0.37082   | 0.17629 |
| 40-44     | 0.30857                 | 0.49143   | 0.20000 | 0.38824                   | 0.37941   | 0.23235 |
| 45-49     | 0.31429                 | 0.48571   | 0.20000 | 0.29355                   | 0.42258   | 0.28387 |
| 50-54     | 0.29231                 | 0.45385   | 0.25385 | 0.23970                   | 0.41948   | 0.34082 |
| 55-59     | 0.31667                 | 0.46667   | 0.21667 | 0.23874                   | 0.45045   | 0.31081 |

**Table 5. Prevalent rates of entire population by age group, gender, and body mass index category in 2010 (Caribe region)**

| Age Group | Nutritional State Males |           |         | Nutritional State Females |           |         |
|-----------|-------------------------|-----------|---------|---------------------------|-----------|---------|
|           | Not-Overweigh           | Overweigh | Obese   | Not-Overweigh             | Overweigh | Obese   |
| 0-4       | 0.74984                 | 0.19572   | 0.05444 | 0.78199                   | 0.17084   | 0.04718 |
| 5-9       | 0.81667                 | 0.11923   | 0.06410 | 0.81776                   | 0.12989   | 0.05235 |
| 10-14     | 0.81581                 | 0.12345   | 0.06074 | 0.80601                   | 0.14958   | 0.04442 |
| 15-19     | 0.86134                 | 0.09872   | 0.03994 | 0.81877                   | 0.14296   | 0.03827 |
| 20-24     | 0.73229                 | 0.19167   | 0.07604 | 0.71296                   | 0.20463   | 0.08241 |
| 25-29     | 0.53554                 | 0.32108   | 0.14338 | 0.55194                   | 0.30804   | 0.14002 |
| 30-34     | 0.44954                 | 0.36566   | 0.18480 | 0.44521                   | 0.34834   | 0.20646 |
| 35-39     | 0.38959                 | 0.40788   | 0.20253 | 0.39918                   | 0.37769   | 0.22313 |
| 40-44     | 0.34884                 | 0.42151   | 0.22965 | 0.34736                   | 0.40215   | 0.25049 |
| 45-49     | 0.39465                 | 0.44969   | 0.15566 | 0.25573                   | 0.44725   | 0.29702 |
| 50-54     | 0.40234                 | 0.41016   | 0.18750 | 0.29475                   | 0.39569   | 0.30956 |
| 55-59     | 0.41422                 | 0.42402   | 0.16176 | 0.25291                   | 0.40266   | 0.34443 |

**Table 6. Prevalent rates of lower socioeconomic status population by age group, gender, and body mass index category in 2010 (Caribe region)**

| Age Group | Nutritional State Males |           |         | Nutritional State Females |           |         |
|-----------|-------------------------|-----------|---------|---------------------------|-----------|---------|
|           | Not-Overweigh           | Overweigh | Obese   | Not-Overweigh             | Overweigh | Obese   |
| 0-4       | 0.74797                 | 0.20209   | 0.04994 | 0.79267                   | 0.16941   | 0.03793 |
| 5-9       | 0.84961                 | 0.10213   | 0.04826 | 0.85615                   | 0.10325   | 0.04060 |
| 10-14     | 0.85993                 | 0.09501   | 0.04507 | 0.81165                   | 0.15242   | 0.03594 |
| 15-19     | 0.89886                 | 0.07407   | 0.02707 | 0.81686                   | 0.14680   | 0.03634 |
| 20-24     | 0.76459                 | 0.16298   | 0.07243 | 0.69811                   | 0.20755   | 0.09434 |
| 25-29     | 0.61330                 | 0.27586   | 0.11084 | 0.52495                   | 0.32163   | 0.15342 |
| 30-34     | 0.50505                 | 0.34848   | 0.14646 | 0.42520                   | 0.33858   | 0.23622 |
| 35-39     | 0.45580                 | 0.36464   | 0.17956 | 0.40889                   | 0.36889   | 0.22222 |

|       |         |         |         |         |         |         |
|-------|---------|---------|---------|---------|---------|---------|
| 40-44 | 0.37330 | 0.43324 | 0.19346 | 0.35700 | 0.38742 | 0.25558 |
| 45-49 | 0.43558 | 0.42331 | 0.14110 | 0.27569 | 0.40852 | 0.31579 |
| 50-54 | 0.48289 | 0.36502 | 0.15209 | 0.31686 | 0.38663 | 0.29651 |
| 55-59 | 0.51064 | 0.38298 | 0.10638 | 0.29412 | 0.38824 | 0.31765 |

**Table 7. Prevalent rates of middle socioeconomic status population by age group, gender, and body mass index category in 2010 (Caribe region)**

| Age Group | Nutritional State Males |           |         | Nutritional State Females |           |         |
|-----------|-------------------------|-----------|---------|---------------------------|-----------|---------|
|           | Not-Overweigh           | Overweigh | Obese   | Not-Overweigh             | Overweigh | Obese   |
| 0-4       | 0.80612                 | 0.15306   | 0.04082 | 0.80352                   | 0.14663   | 0.04985 |
| 5-9       | 0.81548                 | 0.13393   | 0.05060 | 0.85559                   | 0.11172   | 0.03270 |
| 10-14     | 0.81572                 | 0.15718   | 0.02710 | 0.83333                   | 0.13218   | 0.03448 |
| 15-19     | 0.86875                 | 0.10313   | 0.02813 | 0.84146                   | 0.10976   | 0.04878 |
| 20-24     | 0.76077                 | 0.17703   | 0.06220 | 0.72374                   | 0.21790   | 0.05837 |
| 25-29     | 0.57346                 | 0.27962   | 0.14692 | 0.60465                   | 0.29070   | 0.10465 |
| 30-34     | 0.48276                 | 0.33333   | 0.18391 | 0.45126                   | 0.37906   | 0.16968 |
| 35-39     | 0.34426                 | 0.43716   | 0.21858 | 0.42041                   | 0.33469   | 0.24490 |
| 40-44     | 0.36667                 | 0.39333   | 0.24000 | 0.35135                   | 0.40154   | 0.24710 |
| 45-49     | 0.41060                 | 0.45033   | 0.13907 | 0.21287                   | 0.47030   | 0.31683 |
| 50-54     | 0.45872                 | 0.38532   | 0.15596 | 0.36420                   | 0.35185   | 0.28395 |
| 55-59     | 0.43956                 | 0.41758   | 0.14286 | 0.27941                   | 0.34559   | 0.37500 |

**Table 8. Prevalent rates of higher socioeconomic status population by age group, gender, and body mass index category in 2010 (Caribe region)**

| Age Group | Nutritional State Males |           |         | Nutritional State Females |           |         |
|-----------|-------------------------|-----------|---------|---------------------------|-----------|---------|
|           | Not-Overweigh           | Overweigh | Obese   | Not-Overweigh             | Overweigh | Obese   |
| 0-4       | 0.67931                 | 0.23448   | 0.08621 | 0.72285                   | 0.20599   | 0.07116 |
| 5-9       | 0.72973                 | 0.15015   | 0.12012 | 0.65000                   | 0.23571   | 0.11429 |
| 10-14     | 0.70968                 | 0.15543   | 0.13490 | 0.76862                   | 0.15957   | 0.07181 |
| 15-19     | 0.76721                 | 0.15082   | 0.08197 | 0.80217                   | 0.16531   | 0.03252 |
| 20-24     | 0.64567                 | 0.25984   | 0.09449 | 0.73038                   | 0.18771   | 0.08191 |
| 25-29     | 0.33668                 | 0.45729   | 0.20603 | 0.55519                   | 0.29870   | 0.14610 |
| 30-34     | 0.30570                 | 0.43005   | 0.26425 | 0.48101                   | 0.33333   | 0.18565 |
| 35-39     | 0.29518                 | 0.46988   | 0.23494 | 0.36525                   | 0.42908   | 0.20567 |
| 40-44     | 0.28070                 | 0.42105   | 0.29825 | 0.32593                   | 0.42963   | 0.24444 |
| 45-49     | 0.29560                 | 0.50314   | 0.20126 | 0.25830                   | 0.48708   | 0.25461 |
| 50-54     | 0.20714                 | 0.51429   | 0.27857 | 0.21519                   | 0.43882   | 0.34599 |
| 55-59     | 0.25581                 | 0.48837   | 0.25581 | 0.18571                   | 0.45714   | 0.35714 |

**Table 9. Fraction of births for men by body mass index category, and socioeconomic status (Caribe region) †**

| Population group | Lower SES (%/year) | Middle SES (%/year) | Higher SES (%/year) | Complete Urban Population (%/year) |
|------------------|--------------------|---------------------|---------------------|------------------------------------|
| Not- overweight  | 84,96%             | 72,73%              | 75,86%              | 79,77%                             |
| Overweight       | 9,77%              | 18,18%              | 15,52%              | 13,23%                             |
| Obese            | 5,26%              | 9,09%               | 8,62%               | 7,00%                              |

† The fractions of births by each BMI category correspond to the prevalences by BMI category of children aged

0 to 12 months

**Table 10. Fraction of births for women by body mass index category and socioeconomic status (Caribe region) †**

| Population group | Lower SES (%/year) | Middle SES (%/year) | Higher SES (%/year) | Complete Urban Population (%/year) |
|------------------|--------------------|---------------------|---------------------|------------------------------------|
| Not- overweight  | 81,43%             | 75,68%              | 69,84%              | 77,26%                             |
| Overweight       | 17,86%             | 17,57%              | 22,22%              | 18,77%                             |
| Obese            | 0,71%              | 6,76%               | 7,94%               | 3,97%                              |

† The fractions of births by each BMI category correspond to the prevalences by BMI category of children aged 0 to 12 months

**Table 11. Mortality rates for men and population size by age group without segregate by socioeconomic status (Caribe region) †**

| Age group | Mortality rates (R) (%/year) | Not- overweight men in 2005 (Number of people) <sup>1</sup> | Overweight men in 2005 (Number of people) <sup>2</sup> | Obese men in 2005 (Number of people) <sup>3</sup> |
|-----------|------------------------------|-------------------------------------------------------------|--------------------------------------------------------|---------------------------------------------------|
| 0-4       | 0,00612                      | 269775                                                      | 73076                                                  | 17908                                             |
| 5-9       | 0,00046                      | 301926                                                      | 39186                                                  | 20557                                             |
| 10-14     | 0,00045                      | 310652                                                      | 33350                                                  | 12352                                             |
| 15-19     | 0,00161                      | 297832                                                      | 24381                                                  | 8127                                              |
| 20-24     | 0,00368                      | 218694                                                      | 52690                                                  | 13014                                             |
| 25-29     | 0,00423                      | 157427                                                      | 70391                                                  | 20805                                             |
| 30-34     | 0,00416                      | 108075                                                      | 83134                                                  | 24579                                             |
| 35-39     | 0,00403                      | 98567                                                       | 83431                                                  | 31010                                             |
| 40-44     | 0,00481                      | 90149                                                       | 79478                                                  | 28700                                             |
| 45-49     | 0,00574                      | 68289                                                       | 64129                                                  | 28078                                             |
| 50-54     | 0,00843                      | 58448                                                       | 44776                                                  | 22901                                             |
| 55-59     | 0,01214                      | 44561                                                       | 36344                                                  | 16434                                             |

† Values used in this table are for the urban population

<sup>1</sup> Initial value used in the stock of not-overweight population in 2005.

<sup>2</sup> Initial value used in the stock of overweight population in 2005.

<sup>3</sup> Initial value used in the stock of obese population in 2005.

**Table 12. Mortality rates for women and population size by age group without segregate by socioeconomic status (Caribe region) †**

| Age group | Mortality rates (R) (%/year) | Not- overweight men in 2005 (Number of people) <sup>1</sup> | Overweight men in 2005 (Number of people) <sup>2</sup> | Obese men in 2005 (Number of people) <sup>3</sup> |
|-----------|------------------------------|-------------------------------------------------------------|--------------------------------------------------------|---------------------------------------------------|
| 0-4       | 0,01083                      | 278590                                                      | 57190                                                  | 12174                                             |
| 5-9       | 0,00023                      | 297854                                                      | 41200                                                  | 11482                                             |
| 10-14     | 0,00022                      | 294633                                                      | 43205                                                  | 6601                                              |
| 15-19     | 0,00033                      | 281467                                                      | 40373                                                  | 7618                                              |
| 20-24     | 0,00048                      | 240108                                                      | 51198                                                  | 14933                                             |
| 25-29     | 0,00046                      | 175494                                                      | 69075                                                  | 27093                                             |
| 30-34     | 0,00060                      | 122749                                                      | 80725                                                  | 35614                                             |
| 35-39     | 0,00089                      | 114031                                                      | 83803                                                  | 41287                                             |
| 40-44     | 0,00113                      | 90818                                                       | 83110                                                  | 43843                                             |
| 45-49     | 0,00184                      | 57737                                                       | 76149                                                  | 44780                                             |
| 50-54     | 0,00239                      | 46299                                                       | 53610                                                  | 38786                                             |
| 55-59     | 0,00349                      | 36233                                                       | 41823                                                  | 29814                                             |

† Values used in this table are for the urban population

<sup>1</sup> Initial value used in the stock of not-overweight population in 2005.

<sup>2</sup> Initial value used in the stock of overweight population in 2005.

<sup>3</sup> Initial value used in the stock of obese population in 2005.

**Table 13. Man mortality rates and population size by age group for the lower socioeconomic status population (Caribe region) †**

| Age group | Mortality rates (R) (%/year) | Not- overweight men in 2005 (Number of people) <sup>1</sup> | Overweight men in 2005 (Number of people) <sup>2</sup> | Obese men in 2005 (Number of people) <sup>3</sup> |
|-----------|------------------------------|-------------------------------------------------------------|--------------------------------------------------------|---------------------------------------------------|
| 0-4       | 0,00612                      | 140953                                                      | 37260                                                  | 5777                                              |
| 5-9       | 0,00046                      | 161241                                                      | 12206                                                  | 3854                                              |
| 10-14     | 0,00045                      | 153164                                                      | 10499                                                  | 2470                                              |
| 15-19     | 0,00161                      | 139594                                                      | 6215                                                   | 0                                                 |
| 20-24     | 0,00368                      | 97762                                                       | 15236                                                  | 4126                                              |
| 25-29     | 0,00423                      | 75939                                                       | 26700                                                  | 4508                                              |
| 30-34     | 0,00416                      | 58917                                                       | 27109                                                  | 7229                                              |
| 35-39     | 0,00403                      | 48730                                                       | 29533                                                  | 6645                                              |
| 40-44     | 0,00481                      | 43051                                                       | 24285                                                  | 6623                                              |
| 45-49     | 0,00574                      | 31891                                                       | 18025                                                  | 5893                                              |
| 50-54     | 0,00843                      | 31446                                                       | 15723                                                  | 6152                                              |
| 55-59     | 0,01214                      | 19910                                                       | 7901                                                   | 4108                                              |

†Values used in this table are for the urban population

<sup>1</sup> Initial value used in the stock of not-overweight population in 2005 for lower SES.

<sup>2</sup> Initial value used in the stock of overweight population in 2005 for lower SES.

<sup>3</sup> Initial value used in the stock of obese population in 2005 for lower SES.

**Table 14. Women mortality rates and population size by age group for the lower socioeconomic status population (Caribe region) †**

| Age group | Mortality rates (R) (%/year) | Not- overweight women in 2005 (Number of people) <sup>1</sup> | Overweight women in 2005 (Number of people) <sup>2</sup> | Obese women in 2005 (Number of people) <sup>3</sup> |
|-----------|------------------------------|---------------------------------------------------------------|----------------------------------------------------------|-----------------------------------------------------|
| 0-4       | 0,01083                      | 147687                                                        | 26236                                                    | 3537                                                |
| 5-9       | 0,00023                      | 154728                                                        | 15062                                                    | 2054                                                |
| 10-14     | 0,00022                      | 144784                                                        | 13820                                                    | 1974                                                |
| 15-19     | 0,00033                      | 126197                                                        | 15879                                                    | 3343                                                |
| 20-24     | 0,00048                      | 98789                                                         | 21563                                                    | 5767                                                |
| 25-29     | 0,00046                      | 76159                                                         | 30165                                                    | 10752                                               |
| 30-34     | 0,00060                      | 57433                                                         | 31327                                                    | 14564                                               |
| 35-39     | 0,00089                      | 46702                                                         | 31954                                                    | 16660                                               |
| 40-44     | 0,00113                      | 39543                                                         | 27866                                                    | 13800                                               |
| 45-49     | 0,00184                      | 22966                                                         | 25141                                                    | 14021                                               |
| 50-54     | 0,00239                      | 26332                                                         | 19817                                                    | 12487                                               |
| 55-59     | 0,00349                      | 17265                                                         | 10738                                                    | 7369                                                |

†Values used in this table are for the urban population

<sup>1</sup> Initial value used in the stock of not-overweight population in 2005 for lower SES.

<sup>2</sup> Initial value used in the stock of overweight population in 2005 for lower SES.

<sup>3</sup> Initial value used in the stock of obese population in 2005 for lower SES.

**Table 15. Man mortality rates and population size by age group for the middle socioeconomic status population (Caribe region) †**

| Age group | Mortality rates (R) (%/year) | Not- overweight men in 2005 (Number of people) <sup>1</sup> | Overweight men in 2005 (Number of people) <sup>2</sup> | Obese men in 2005 (Number of people) <sup>3</sup> |
|-----------|------------------------------|-------------------------------------------------------------|--------------------------------------------------------|---------------------------------------------------|
| 0-4       | 0,00612                      | 65566                                                       | 20508                                                  | 4910                                              |
| 5-9       | 0,00046                      | 82869                                                       | 8994                                                   | 4497                                              |
| 10-14     | 0,00045                      | 85846                                                       | 8029                                                   | 3706                                              |



|       |         |       |       |       |
|-------|---------|-------|-------|-------|
| 15-19 | 0,00161 | 78880 | 4781  | 5259  |
| 20-24 | 0,00368 | 60625 | 13331 | 2222  |
| 25-29 | 0,00423 | 45425 | 19765 | 5895  |
| 30-34 | 0,00416 | 24579 | 24940 | 6145  |
| 35-39 | 0,00403 | 25472 | 22150 | 10706 |
| 40-44 | 0,00481 | 27229 | 23549 | 9199  |
| 45-49 | 0,00574 | 17332 | 16639 | 10053 |
| 50-54 | 0,00843 | 14014 | 8887  | 5469  |
| 55-59 | 0,01214 | 12641 | 10745 | 4108  |

†Values used in this table are for the urban population

1 Initial value used in the stock of not-overweight population in 2005 for middle SES.

2 Initial value used in the stock of overweight population in 2005 for middle SES.

3 Initial value used in the stock of obese population in 2005 for middle SES.

**Table 16. Women mortality rates and population size by age group for the middle socioeconomic status population (Caribe region) †**

| Age group | Mortality rates (R) (%/year) | Not- overweight women in 2005 (Number of people) <sup>1</sup> | Overweight women in 2005 (Number of people) <sup>2</sup> | Obese women in 2005 (Number of people) <sup>3</sup> |
|-----------|------------------------------|---------------------------------------------------------------|----------------------------------------------------------|-----------------------------------------------------|
| 0-4       | 0,01083                      | 68433                                                         | 15565                                                    | 3757                                                |
| 5-9       | 0,00023                      | 77096                                                         | 10029                                                    | 6268                                                |
| 10-14     | 0,00022                      | 81233                                                         | 12539                                                    | 545                                                 |
| 15-19     | 0,00033                      | 74825                                                         | 11481                                                    | 2375                                                |
| 20-24     | 0,00048                      | 64854                                                         | 13558                                                    | 3616                                                |
| 25-29     | 0,00046                      | 48269                                                         | 19602                                                    | 9801                                                |
| 30-34     | 0,00060                      | 31694                                                         | 21629                                                    | 8352                                                |
| 35-39     | 0,00089                      | 31962                                                         | 22640                                                    | 10876                                               |
| 40-44     | 0,00113                      | 24505                                                         | 28334                                                    | 13018                                               |
| 45-49     | 0,00184                      | 15217                                                         | 22378                                                    | 11413                                               |
| 50-54     | 0,00239                      | 10451                                                         | 12323                                                    | 8423                                                |
| 55-59     | 0,00349                      | 9304                                                          | 11862                                                    | 9304                                                |

†Values used in this table are for the urban population

1 Initial value used in the stock of not-overweight population in 2005 for middle SES.

2 Initial value used in the stock of overweight population in 2005 for middle SES.

3 Initial value used in the stock of obese population in 2005 for middle SES.

**Table 17. Man mortality rates and population size by age group for the higher socioeconomic status population (Caribe region) †**

| Age group | Mortality rates (R) (%/year) | Not- overweight men in 2005 (Number of people) <sup>1</sup> | Overweight men in 2005 (Number of people) <sup>2</sup> | Obese men in 2005 (Number of people) <sup>3</sup> |
|-----------|------------------------------|-------------------------------------------------------------|--------------------------------------------------------|---------------------------------------------------|
| 0-4       | 0,00612                      | 63256                                                       | 15308                                                  | 7221                                              |
| 5-9       | 0,00046                      | 57816                                                       | 17987                                                  | 12206                                             |
| 10-14     | 0,00045                      | 71641                                                       | 14822                                                  | 6176                                              |
| 15-19     | 0,00161                      | 79358                                                       | 13386                                                  | 2868                                              |
| 20-24     | 0,00368                      | 60308                                                       | 24123                                                  | 6666                                              |
| 25-29     | 0,00423                      | 36062                                                       | 23926                                                  | 10403                                             |
| 30-34     | 0,00416                      | 24579                                                       | 31085                                                  | 11205                                             |
| 35-39     | 0,00403                      | 24365                                                       | 31748                                                  | 13659                                             |
| 40-44     | 0,00481                      | 19869                                                       | 31644                                                  | 12878                                             |
| 45-49     | 0,00574                      | 19065                                                       | 29465                                                  | 12133                                             |
| 50-54     | 0,00843                      | 12988                                                       | 20166                                                  | 11279                                             |
| 55-59     | 0,01214                      | 12009                                                       | 17698                                                  | 8217                                              |

†Values used in this table are for the urban population

<sup>1</sup> Initial value used in the stock of not-overweight population in 2005 for higher SES.

<sup>2</sup> Initial value used in the stock of overweight population in 2005 for higher SES.

<sup>3</sup> Initial value used in the stock of obese population in 2005 for higher SES.

**Table 18. Women mortality rates and population size by age group for the higher socioeconomic status population (Caribe region) †**

| Age group | Mortality rates (R) (%/year) | Not- overweight women in 2005 (Number of people) <sup>1</sup> | Overweight women in 2005 (Number of people) <sup>2</sup> | Obese women in 2005 (Number of people) <sup>3</sup> |
|-----------|------------------------------|---------------------------------------------------------------|----------------------------------------------------------|-----------------------------------------------------|
| 0-4       | 0,01083                      | 62883                                                         | 15169                                                    | 4689                                                |
| 5-9       | 0,00023                      | 65946                                                         | 16486                                                    | 2867                                                |
| 10-14     | 0,00022                      | 69581                                                         | 15969                                                    | 3992                                                |
| 15-19     | 0,00033                      | 80711                                                         | 12693                                                    | 1953                                                |
| 20-24     | 0,00048                      | 76447                                                         | 16118                                                    | 5526                                                |
| 25-29     | 0,00046                      | 50832                                                         | 19419                                                    | 6663                                                |
| 30-34     | 0,00060                      | 34560                                                         | 27000                                                    | 12528                                               |
| 35-39     | 0,00089                      | 35473                                                         | 29045                                                    | 13808                                               |
| 40-44     | 0,00113                      | 27450                                                         | 26826                                                    | 16428                                               |
| 45-49     | 0,00184                      | 19823                                                         | 28537                                                    | 19170                                               |
| 50-54     | 0,00239                      | 11712                                                         | 20497                                                    | 16654                                               |
| 55-59     | 0,00349                      | 10034                                                         | 18931                                                    | 13063                                               |

†Values used in this table are for the urban population

<sup>1</sup> Initial value used in the stock of not-overweight population in 2005 for higher SES.

<sup>2</sup> Initial value used in the stock of overweight population in 2005 for higher SES.

<sup>3</sup> Initial value used in the stock of obese population in 2005 for higher SES.

**Table 19. Data and projections of the Fertility rates by department and Region (Caribe region) †**

| Year | Fecundity Rate Dept 08 | Fecundity Rate Dept 13 | Fecundity Rate Dept 20 | Fecundity Rate Dept 23 | Fecundity Rate Dept 44 | Fecundity Rate Dept 47 | Fecundity Rate Dept 70 | Fecundity Rate Dept 88 | Average Fecundity Rate |
|------|------------------------|------------------------|------------------------|------------------------|------------------------|------------------------|------------------------|------------------------|------------------------|
| 2005 | 2,4597                 | 2,9078                 | 3,2147                 | 3,1016                 | 4,0106                 | 3,2734                 | 2,9719                 | 2,3611                 | 3,038                  |
| 2006 | 2,4293                 | 2,8642                 | 3,1498                 | 3,0604                 | 3,9724                 | 3,2471                 | 2,9206                 | 2,3429                 | 2,998                  |
| 2007 | 2,3989                 | 2,8206                 | 3,0849                 | 3,0192                 | 3,9342                 | 3,2208                 | 2,8693                 | 2,3247                 | 2,959                  |
| 2008 | 2,3685                 | 2,777                  | 3,02                   | 2,978                  | 3,896                  | 3,1945                 | 2,818                  | 2,3065                 | 2,920                  |
| 2009 | 2,3467                 | 2,7432                 | 2,9725                 | 2,9384                 | 3,8417                 | 3,1575                 | 2,7801                 | 2,2935                 | 2,884                  |
| 2010 | 2,3249                 | 2,7094                 | 2,925                  | 2,8988                 | 3,7874                 | 3,1205                 | 2,7422                 | 2,2805                 | 2,849                  |
| 2011 | 2,3031                 | 2,6756                 | 2,8775                 | 2,8592                 | 3,7331                 | 3,0835                 | 2,7043                 | 2,2675                 | 2,813                  |
| 2012 | 2,2813                 | 2,6418                 | 2,83                   | 2,8196                 | 3,6788                 | 3,0465                 | 2,6664                 | 2,2545                 | 2,777                  |
| 2013 | 2,2595                 | 2,608                  | 2,7825                 | 2,78                   | 3,6245                 | 3,0095                 | 2,6285                 | 2,2415                 | 2,742                  |
| 2014 | 2,2456                 | 2,5863                 | 2,7528                 | 2,7494                 | 3,565                  | 2,9679                 | 2,6031                 | 2,2322                 | 2,713                  |
| 2015 | 2,2317                 | 2,5646                 | 2,7231                 | 2,7188                 | 3,5055                 | 2,9263                 | 2,5777                 | 2,2229                 | 2,684                  |
| 2016 | 2,2178                 | 2,5429                 | 2,6934                 | 2,6882                 | 3,446                  | 2,8847                 | 2,5523                 | 2,2136                 | 2,655                  |
| 2017 | 2,2039                 | 2,5212                 | 2,6637                 | 2,6576                 | 3,3865                 | 2,8431                 | 2,5269                 | 2,2043                 | 2,626                  |
| 2018 | 2,19                   | 2,4995                 | 2,634                  | 2,627                  | 3,327                  | 2,8015                 | 2,5015                 | 2,195                  | 2,597                  |
| 2019 | 2,1761                 | 2,4778                 | 2,6043                 | 2,5964                 | 3,2675                 | 2,7599                 | 2,4761                 | 2,1857                 | 2,568                  |
| 2020 | 2,1622                 | 2,4561                 | 2,5746                 | 2,5658                 | 3,208                  | 2,7183                 | 2,4507                 | 2,1764                 | 2,539                  |
| 2021 | 2,1483                 | 2,4344                 | 2,5449                 | 2,5352                 | 3,1485                 | 2,6767                 | 2,4253                 | 2,1671                 | 2,510                  |
| 2022 | 2,1344                 | 2,4127                 | 2,5152                 | 2,5046                 | 3,089                  | 2,6351                 | 2,3999                 | 2,1578                 | 2,481                  |
| 2023 | 2,1205                 | 2,391                  | 2,4855                 | 2,474                  | 3,0295                 | 2,5935                 | 2,3745                 | 2,1485                 | 2,452                  |

| Year | Fecundity Rate Dept 08 | Fecundity Rate Dept 13 | Fecundity Rate Dept 20 | Fecundity Rate Dept 23 | Fecundity Rate Dept 44 | Fecundity Rate Dept 47 | Fecundity Rate Dept 70 | Fecundity Rate Dept 88 | Average Fecundity Rate |
|------|------------------------|------------------------|------------------------|------------------------|------------------------|------------------------|------------------------|------------------------|------------------------|
| 2024 | 2,1066                 | 2,3693                 | 2,4558                 | 2,4434                 | 2,97                   | 2,5519                 | 2,3491                 | 2,1392                 | 2,423                  |
| 2025 | 2,0927                 | 2,3476                 | 2,4261                 | 2,4128                 | 2,9105                 | 2,5103                 | 2,3237                 | 2,1299                 | 2,394                  |
| 2026 | 2,0788                 | 2,3259                 | 2,3964                 | 2,3822                 | 2,851                  | 2,4687                 | 2,2983                 | 2,1206                 | 2,365                  |
| 2027 | 2,0649                 | 2,3042                 | 2,3667                 | 2,3516                 | 2,7915                 | 2,4271                 | 2,2729                 | 2,1113                 | 2,336                  |
| 2028 | 2,051                  | 2,2825                 | 2,337                  | 2,321                  | 2,732                  | 2,3855                 | 2,2475                 | 2,102                  | 2,307                  |
| 2029 | 2,0371                 | 2,2608                 | 2,3073                 | 2,2904                 | 2,6725                 | 2,3439                 | 2,2221                 | 2,0927                 | 2,278                  |
| 2030 | 2,0232                 | 2,2391                 | 2,2776                 | 2,2598                 | 2,613                  | 2,3023                 | 2,1967                 | 2,0834                 | 2,249                  |

† Data of Fertility rate of Colombian National Department of Statistics (DANE) [1] was used to forecast the department's fertility rate from 2005 to 2030. Holt-Winters no seasonal method in EViews 5 (Quantitative Micro Software, LLC) was used to forecast the fertility rate. In the SD model we used data from 2005 to 2030 and the region fertility rate was calculated as the average of all departments' fertility rates.

**Table 20. Fraction of births by departments, body mass index category, and socioeconomic status†**

| Population group |                 | Lower SES (%/year) | Middle SES (%/year) | Higher SES (%/year) | Complete Urban Population (%/year) |
|------------------|-----------------|--------------------|---------------------|---------------------|------------------------------------|
| Department 08    | Not- overweight | 82,14%             | 73,68%              | 72,50%              | 76,87%                             |
|                  | Overweight      | 16,07%             | 18,42%              | 25,00%              | 19,40%                             |
|                  | Obese           | 1,79%              | 7,89%               | 2,50%               | 3,73%                              |
| Department 13    | Not- overweight | 84,00%             | 78,57%              | 70,59%              | 78,57%                             |
|                  | Overweight      | 12,00%             | 14,29%              | 11,76%              | 12,50%                             |
|                  | Obese           | 4,00%              | 7,14%               | 17,65%              | 8,93%                              |
| Department 20    | Not- overweight | 94,59%             | 79,17%              | 73,68%              | 85,00%                             |
|                  | Overweight      | 5,41%              | 20,83%              | 15,79%              | 12,50%                             |
|                  | Obese           | 0,00%              | 0,00%               | 10,53%              | 2,50%                              |
| Department 23    | Not- overweight | 75,00%             | 75,00%              | 55,56%              | 71,11%                             |
|                  | Overweight      | 25,00%             | 25,00%              | 22,22%              | 24,44%                             |
|                  | Obese           | 0,00%              | 0,00%               | 22,22%              | 4,44%                              |
| Department 44    | Not- overweight | 91,49%             | 69,23%              | 71,43%              | 81,61%                             |
|                  | Overweight      | 8,51%              | 23,08%              | 21,43%              | 14,94%                             |
|                  | Obese           | 0,00%              | 7,69%               | 7,14%               | 3,45%                              |
| Department 47    | Not- overweight | 76,47%             | 81,25%              | 90,00%              | 80,00%                             |
|                  | Overweight      | 14,71%             | 12,50%              | 10,00%              | 13,33%                             |
|                  | Obese           | 8,82%              | 6,25%               | 0,00%               | 6,67%                              |
| Department 70    | Not- overweight | 76,00%             | 64,29%              | 84,62%              | 75,32%                             |
|                  | Overweight      | 20,00%             | 14,29%              | 7,69%               | 16,88%                             |
|                  | Obese           | 4,00%              | 21,43%              | 7,69%               | 7,79%                              |
| Department 88    | Not- overweight | 60,00%             | 57,14%              | 60,00%              | 59,09%                             |
|                  | Overweight      | 30,00%             | 28,57%              | 40,00%              | 31,82%                             |
|                  | Obese           | 10,00%             | 14,29%              | 0,00%               | 9,09%                              |

† The fractions of births by each BMI category correspond to the prevalences by BMI category of children aged 0 to 12 months

**Table 21. Prevalent rates of entire population by age group, and body mass index category (Caribe region)**

| Departments  | Age group | Not- overweight in 2005 | Overweight in 2005 | Obese in 2005 | Not- overweight in 2010 | Overweight in 2010 | Obese in 2010 |
|--------------|-----------|-------------------------|--------------------|---------------|-------------------------|--------------------|---------------|
| Department 8 | 0-4       | 0.76748                 | 0.19187            | 0.04065       | 0.71498                 | 0.21824            | 0.06678       |
|              | 5-9       | 0.85308                 | 0.09005            | 0.05687       | 0.80705                 | 0.12584            | 0.06711       |
|              | 10-14     | 0.82573                 | 0.13278            | 0.04149       | 0.78130                 | 0.15693            | 0.06177       |
|              | 15-19     | 0.87772                 | 0.10326            | 0.01902       | 0.81031                 | 0.13260            | 0.05709       |

| Departments   | Age group     | Not- overweight in 2005 | Overweight in 2005 | Obese in 2005 | Not- overweight in 2010 | Overweight in 2010 | Obese in 2010 |
|---------------|---------------|-------------------------|--------------------|---------------|-------------------------|--------------------|---------------|
|               | 20-24         | 0.78268                 | 0.16469            | 0.05263       | 0.74014                 | 0.20186            | 0.05800       |
|               | 25-29         | 0.61024                 | 0.27394            | 0.11581       | 0.54717                 | 0.30728            | 0.14555       |
|               | 30-34         | 0.52577                 | 0.32216            | 0.15206       | 0.43939                 | 0.32727            | 0.23333       |
|               | 35-39         | 0.50535                 | 0.35027            | 0.14439       | 0.34824                 | 0.40575            | 0.24601       |
|               | 40-44         | 0.42781                 | 0.37968            | 0.19251       | 0.33918                 | 0.40351            | 0.25731       |
|               | 45-49         | 0.39308                 | 0.39623            | 0.21069       | 0.33550                 | 0.39739            | 0.26710       |
|               | 50-54         | 0.37638                 | 0.36162            | 0.26199       | 0.36260                 | 0.40076            | 0.23664       |
| Department 13 | 55-59         | 0.37879                 | 0.41919            | 0.20202       | 0.29126                 | 0.38835            | 0.32039       |
|               | 0-4           | 0.81884                 | 0.14493            | 0.03623       | 0.73684                 | 0.21303            | 0.05013       |
|               | 5-9           | 0.85821                 | 0.10448            | 0.03731       | 0.82339                 | 0.12615            | 0.05046       |
|               | 10-14         | 0.84756                 | 0.10976            | 0.04268       | 0.80471                 | 0.15059            | 0.04471       |
|               | 15-19         | 0.92593                 | 0.06349            | 0.01058       | 0.86768                 | 0.09415            | 0.03817       |
|               | 20-24         | 0.84444                 | 0.10741            | 0.04815       | 0.75080                 | 0.16294            | 0.08626       |
|               | 25-29         | 0.70936                 | 0.24631            | 0.04433       | 0.57143                 | 0.31579            | 0.11278       |
|               | 30-34         | 0.53365                 | 0.33654            | 0.12981       | 0.42023                 | 0.40467            | 0.17510       |
|               | 35-39         | 0.52083                 | 0.33854            | 0.14063       | 0.42373                 | 0.36441            | 0.21186       |
|               | 40-44         | 0.49714                 | 0.34857            | 0.15429       | 0.34538                 | 0.40964            | 0.24498       |
|               | 45-49         | 0.40341                 | 0.41477            | 0.18182       | 0.32105                 | 0.43158            | 0.24737       |
|               | 50-54         | 0.48148                 | 0.29630            | 0.22222       | 0.36424                 | 0.36424            | 0.27152       |
|               | 55-59         | 0.37615                 | 0.39450            | 0.22936       | 0.39860                 | 0.32168            | 0.27972       |
| Department 20 | 0-4           | 0.82371                 | 0.16109            | 0.01520       | 0.81989                 | 0.13978            | 0.04032       |
|               | 5-9           | 0.84138                 | 0.11724            | 0.04138       | 0.85286                 | 0.08719            | 0.05995       |
|               | 10-14         | 0.92308                 | 0.04895            | 0.02797       | 0.82171                 | 0.13953            | 0.03876       |
|               | 15-19         | 0.85586                 | 0.12613            | 0.01802       | 0.86869                 | 0.10438            | 0.02694       |
|               | 20-24         | 0.77323                 | 0.18216            | 0.04461       | 0.71041                 | 0.21719            | 0.07240       |
|               | 25-29         | 0.68085                 | 0.22128            | 0.09787       | 0.53744                 | 0.33480            | 0.12775       |
|               | 30-34         | 0.51980                 | 0.37624            | 0.10396       | 0.42640                 | 0.39594            | 0.17766       |
|               | 35-39         | 0.42157                 | 0.39216            | 0.18627       | 0.36898                 | 0.43850            | 0.19251       |
|               | 40-44         | 0.44375                 | 0.39375            | 0.16250       | 0.35593                 | 0.37853            | 0.26554       |
|               | 45-49         | 0.32432                 | 0.45270            | 0.22297       | 0.33553                 | 0.44079            | 0.22368       |
|               | 50-54         | 0.42453                 | 0.34906            | 0.22642       | 0.25806                 | 0.49462            | 0.24731       |
|               | 55-59         | 0.33333                 | 0.39583            | 0.27083       | 0.25843                 | 0.49438            | 0.24719       |
|               | Department 23 | 0-4                     | 0.81609            | 0.15517       | 0.02874                 | 0.76226            | 0.17736       |
| 5-9           |               | 0.84259                 | 0.09259            | 0.06481       | 0.83667                 | 0.13000            | 0.03333       |
| 10-14         |               | 0.90179                 | 0.08036            | 0.01786       | 0.85855                 | 0.11842            | 0.02303       |
| 15-19         |               | 0.83007                 | 0.13725            | 0.03268       | 0.85430                 | 0.12252            | 0.02318       |
| 20-24         |               | 0.80597                 | 0.15920            | 0.03483       | 0.72727                 | 0.20000            | 0.07273       |
| 25-29         |               | 0.70073                 | 0.22628            | 0.07299       | 0.59574                 | 0.25000            | 0.15426       |
| 30-34         |               | 0.57516                 | 0.33333            | 0.09150       | 0.48454                 | 0.34021            | 0.17526       |
| 35-39         |               | 0.51471                 | 0.30882            | 0.17647       | 0.46465                 | 0.36364            | 0.17172       |
| 40-44         |               | 0.43885                 | 0.39568            | 0.16547       | 0.39560                 | 0.40110            | 0.20330       |
| 45-49         |               | 0.47059                 | 0.42157            | 0.10784       | 0.30573                 | 0.47134            | 0.22293       |
| 50-54         |               | 0.32381                 | 0.46667            | 0.20952       | 0.35032                 | 0.34395            | 0.30573       |
| 55-59         |               | 0.42500                 | 0.36250            | 0.21250       | 0.25000                 | 0.44167            | 0.30833       |
| Department 44 |               | 0-4                     | 0.69602            | 0.24716       | 0.05682                 | 0.80919            | 0.16254       |
|               | 5-9           | 0.87283                 | 0.09827            | 0.02890       | 0.85030                 | 0.11976            | 0.02994       |

| Departments      | Age group | Not- overweight<br>in 2005 | Overweight<br>in 2005 | Obese in<br>2005 | Not- overweight<br>in 2010 | Overweight<br>in 2010 | Obese in<br>2010 |
|------------------|-----------|----------------------------|-----------------------|------------------|----------------------------|-----------------------|------------------|
|                  | 10-14     | 0.81955                    | 0.16541               | 0.01504          | 0.87926                    | 0.09598               | 0.02477          |
|                  | 15-19     | 0.90090                    | 0.07658               | 0.02252          | 0.85490                    | 0.11765               | 0.02745          |
|                  | 20-24     | 0.68276                    | 0.25517               | 0.06207          | 0.68306                    | 0.24590               | 0.07104          |
|                  | 25-29     | 0.63300                    | 0.27273               | 0.09428          | 0.49143                    | 0.32571               | 0.18286          |
|                  | 30-34     | 0.46860                    | 0.38164               | 0.14976          | 0.41611                    | 0.28859               | 0.29530          |
|                  | 35-39     | 0.43590                    | 0.39487               | 0.16923          | 0.29167                    | 0.41667               | 0.29167          |
|                  | 40-44     | 0.38191                    | 0.42714               | 0.19095          | 0.39496                    | 0.43697               | 0.16807          |
|                  | 45-49     | 0.31034                    | 0.41379               | 0.27586          | 0.32710                    | 0.44860               | 0.22430          |
|                  | 50-54     | 0.30973                    | 0.42478               | 0.26549          | 0.33684                    | 0.37895               | 0.28421          |
|                  | 55-59     | 0.36170                    | 0.36170               | 0.27660          | 0.31818                    | 0.45455               | 0.22727          |
| Department<br>47 | 0-4       | 0.76817                    | 0.17301               | 0.05882          | 0.80978                    | 0.15217               | 0.03804          |
|                  | 5-9       | 0.83217                    | 0.11888               | 0.04895          | 0.83784                    | 0.10541               | 0.05676          |
|                  | 10-14     | 0.90643                    | 0.08772               | 0.00585          | 0.82840                    | 0.13018               | 0.04142          |
|                  | 15-19     | 0.88950                    | 0.08840               | 0.02210          | 0.83596                    | 0.14511               | 0.01893          |
|                  | 20-24     | 0.80349                    | 0.16594               | 0.03057          | 0.72059                    | 0.18627               | 0.09314          |
|                  | 25-29     | 0.59346                    | 0.29439               | 0.11215          | 0.64135                    | 0.24895               | 0.10970          |
|                  | 30-34     | 0.47953                    | 0.38012               | 0.14035          | 0.51570                    | 0.32735               | 0.15695          |
|                  | 35-39     | 0.45763                    | 0.37853               | 0.16384          | 0.48295                    | 0.32386               | 0.19318          |
|                  | 40-44     | 0.45283                    | 0.36478               | 0.18239          | 0.32222                    | 0.35556               | 0.32222          |
|                  | 45-49     | 0.30081                    | 0.46341               | 0.23577          | 0.35754                    | 0.48603               | 0.15642          |
| Department<br>70 | 0-4       | 0.41284                    | 0.31193               | 0.27523          | 0.40164                    | 0.40164               | 0.19672          |
|                  | 5-9       | 0.79772                    | 0.15954               | 0.04274          | 0.78961                    | 0.17662               | 0.03377          |
|                  | 10-14     | 0.83077                    | 0.14615               | 0.02308          | 0.86250                    | 0.10750               | 0.03000          |
|                  | 15-19     | 0.89726                    | 0.08904               | 0.01370          | 0.84510                    | 0.10023               | 0.05467          |
|                  | 20-24     | 0.88333                    | 0.08889               | 0.02778          | 0.88636                    | 0.10101               | 0.01263          |
|                  | 25-29     | 0.78889                    | 0.17778               | 0.03333          | 0.80797                    | 0.13406               | 0.05797          |
|                  | 30-34     | 0.66372                    | 0.28319               | 0.05310          | 0.54878                    | 0.32927               | 0.12195          |
|                  | 35-39     | 0.50691                    | 0.36866               | 0.12442          | 0.48927                    | 0.38197               | 0.12876          |
|                  | 40-44     | 0.45050                    | 0.40099               | 0.14851          | 0.43902                    | 0.40650               | 0.15447          |
|                  | 45-49     | 0.42690                    | 0.42105               | 0.15205          | 0.39908                    | 0.43119               | 0.16972          |
| Department<br>88 | 0-4       | 0.32759                    | 0.37356               | 0.29885          | 0.31148                    | 0.46995               | 0.21858          |
|                  | 5-9       | 0.34043                    | 0.43972               | 0.21986          | 0.38235                    | 0.37059               | 0.24706          |
|                  | 10-14     | 0.43119                    | 0.34862               | 0.22018          | 0.40909                    | 0.36364               | 0.22727          |
|                  | 15-19     | 0.65217                    | 0.26087               | 0.08696          | 0.70313                    | 0.20703               | 0.08984          |
|                  | 20-24     | 0.65789                    | 0.23684               | 0.10526          | 0.62030                    | 0.22180               | 0.15789          |
|                  | 25-29     | 0.68293                    | 0.24390               | 0.07317          | 0.64372                    | 0.20648               | 0.14980          |
|                  | 30-34     | 0.65854                    | 0.21951               | 0.12195          | 0.69856                    | 0.17225               | 0.12919          |
|                  | 35-39     | 0.68571                    | 0.21429               | 0.10000          | 0.55729                    | 0.28646               | 0.15625          |
|                  | 40-44     | 0.49275                    | 0.31884               | 0.18841          | 0.40376                    | 0.39906               | 0.19718          |
|                  | 45-49     | 0.32759                    | 0.41379               | 0.25862          | 0.37624                    | 0.36634               | 0.25743          |
|                  | 50-54     | 0.41429                    | 0.34286               | 0.24286          | 0.32979                    | 0.39894               | 0.27128          |
|                  | 55-59     | 0.33333                    | 0.37879               | 0.28788          | 0.27160                    | 0.45679               | 0.27160          |
|                  | 60-64     | 0.31746                    | 0.46032               | 0.22222          | 0.23605                    | 0.47210               | 0.29185          |
|                  | 65-69     | 0.32759                    | 0.31034               | 0.36207          | 0.27841                    | 0.42045               | 0.30114          |
|                  | 70-74     |                            |                       |                  |                            |                       |                  |

| Departments | Age group | Not- overweight in 2005 | Overweight in 2005 | Obese in 2005 | Not- overweight in 2010 | Overweight in 2010 | Obese in 2010 |
|-------------|-----------|-------------------------|--------------------|---------------|-------------------------|--------------------|---------------|
|             | 55-59     | 0.23529                 | 0.52941            | 0.23529       | 0.20611                 | 0.49618            | 0.29771       |

**Table 22. Prevalent rates of lower socioeconomic status population by age group, and body mass index category (Caribe region)**

| Departments   | Age group | Not- overweight in 2005 | Overweight in 2005 | Obese in 2005 | Not- overweight in 2010 | Overweight in 2010 | Obese in 2010 |
|---------------|-----------|-------------------------|--------------------|---------------|-------------------------|--------------------|---------------|
| Department 8  | 0-4       | 0.76748                 | 0.19187            | 0.04065       | 0.74806                 | 0.20930            | 0.04264       |
|               | 5-9       | 0.85308                 | 0.09005            | 0.05687       | 0.87868                 | 0.08824            | 0.03309       |
|               | 10-14     | 0.82573                 | 0.13278            | 0.04149       | 0.84135                 | 0.12500            | 0.03365       |
|               | 15-19     | 0.87772                 | 0.10326            | 0.01902       | 0.89418                 | 0.07937            | 0.02646       |
|               | 20-24     | 0.78268                 | 0.16469            | 0.05263       | 0.77852                 | 0.16779            | 0.05369       |
|               | 25-29     | 0.61024                 | 0.27394            | 0.11581       | 0.58824                 | 0.29412            | 0.11765       |
|               | 30-34     | 0.52577                 | 0.32216            | 0.15206       | 0.48673                 | 0.28319            | 0.23009       |
|               | 35-39     | 0.50535                 | 0.35027            | 0.14439       | 0.41414                 | 0.39394            | 0.19192       |
|               | 40-44     | 0.42781                 | 0.37968            | 0.19251       | 0.41525                 | 0.33051            | 0.25424       |
|               | 45-49     | 0.39308                 | 0.39623            | 0.21069       | 0.44000                 | 0.34000            | 0.22000       |
|               | 50-54     | 0.37638                 | 0.36162            | 0.26199       | 0.48684                 | 0.31579            | 0.19737       |
| 55-59         | 0.37879   | 0.41919                 | 0.20202            | 0.38776       | 0.30612                 | 0.30612            |               |
| Department 13 | 0-4       | 0.86726                 | 0.11504            | 0.01770       | 0.74359                 | 0.20000            | 0.05641       |
|               | 5-9       | 0.85714                 | 0.11111            | 0.03175       | 0.87719                 | 0.08333            | 0.03947       |
|               | 10-14     | 0.88571                 | 0.08571            | 0.02857       | 0.83486                 | 0.14679            | 0.01835       |
|               | 15-19     | 0.96721                 | 0.01639            | 0.01639       | 0.88108                 | 0.09189            | 0.02703       |
|               | 20-24     | 0.79787                 | 0.12766            | 0.07447       | 0.77863                 | 0.15267            | 0.06870       |
|               | 25-29     | 0.74286                 | 0.20000            | 0.05714       | 0.62712                 | 0.27119            | 0.10169       |
|               | 30-34     | 0.59155                 | 0.28169            | 0.12676       | 0.34211                 | 0.50877            | 0.14912       |
|               | 35-39     | 0.57143                 | 0.34921            | 0.07937       | 0.50000                 | 0.29167            | 0.20833       |
|               | 40-44     | 0.57143                 | 0.28571            | 0.14286       | 0.36082                 | 0.35052            | 0.28866       |
|               | 45-49     | 0.50000                 | 0.38462            | 0.11538       | 0.38356                 | 0.36986            | 0.24658       |
|               | 50-54     | 0.71795                 | 0.25641            | 0.02564       | 0.34211                 | 0.34211            | 0.31579       |
| 55-59         | 0.58333   | 0.33333                 | 0.08333            | 0.48936       | 0.21277                 | 0.29787            |               |
| Department 20 | 0-4       | 0.87356                 | 0.12069            | 0.00575       | 0.83553                 | 0.14474            | 0.01974       |
|               | 5-9       | 0.89063                 | 0.09375            | 0.01563       | 0.92994                 | 0.05732            | 0.01274       |
|               | 10-14     | 0.95238                 | 0.03175            | 0.01587       | 0.83212                 | 0.14599            | 0.02190       |
|               | 15-19     | 0.86250                 | 0.11250            | 0.02500       | 0.89899                 | 0.08081            | 0.02020       |
|               | 20-24     | 0.78689                 | 0.16393            | 0.04918       | 0.80000                 | 0.15385            | 0.04615       |
|               | 25-29     | 0.69565                 | 0.20652            | 0.09783       | 0.50000                 | 0.34375            | 0.15625       |
|               | 30-34     | 0.63953                 | 0.25581            | 0.10465       | 0.51852                 | 0.29630            | 0.18519       |
|               | 35-39     | 0.48810                 | 0.36905            | 0.14286       | 0.49123                 | 0.33333            | 0.17544       |
|               | 40-44     | 0.56522                 | 0.34783            | 0.08696       | 0.39583                 | 0.43750            | 0.16667       |
|               | 45-49     | 0.36735                 | 0.53061            | 0.10204       | 0.36957                 | 0.41304            | 0.21739       |
|               | 50-54     | 0.55882                 | 0.35294            | 0.08824       | 0.47059                 | 0.47059            | 0.05882       |
| 55-59         | 0.58333   | 0.20833                 | 0.20833            | 0.33333       | 0.51852                 | 0.14815            |               |
| Department 23 | 0-4       | 0.83333                 | 0.14815            | 0.01852       | 0.75490                 | 0.19118            | 0.05392       |
|               | 5-9       | 0.85714                 | 0.10000            | 0.04286       | 0.85652                 | 0.11304            | 0.03043       |
|               | 10-14     | 0.95161                 | 0.03226            | 0.01613       | 0.87500                 | 0.10776            | 0.01724       |

| Departments   | Age group     | Not- overweight in 2005 | Overweight in 2005 | Obese in 2005 | Not- overweight in 2010 | Overweight in 2010 | Obese in 2010 |
|---------------|---------------|-------------------------|--------------------|---------------|-------------------------|--------------------|---------------|
|               | 15-19         | 0.88158                 | 0.11842            | 0.00000       | 0.87019                 | 0.10096            | 0.02885       |
|               | 20-24         | 0.83333                 | 0.13725            | 0.02941       | 0.75862                 | 0.17241            | 0.06897       |
|               | 25-29         | 0.71429                 | 0.25714            | 0.02857       | 0.60000                 | 0.26667            | 0.13333       |
|               | 30-34         | 0.56790                 | 0.33333            | 0.09877       | 0.50000                 | 0.32394            | 0.17606       |
|               | 35-39         | 0.58904                 | 0.24658            | 0.16438       | 0.46575                 | 0.36986            | 0.16438       |
|               | 40-44         | 0.46032                 | 0.28571            | 0.25397       | 0.38281                 | 0.39844            | 0.21875       |
|               | 45-49         | 0.54000                 | 0.36000            | 0.10000       | 0.37374                 | 0.40404            | 0.22222       |
|               | 50-54         | 0.44828                 | 0.36207            | 0.18966       | 0.39048                 | 0.36190            | 0.24762       |
|               | 55-59         | 0.61765                 | 0.29412            | 0.08824       | 0.35526                 | 0.44737            | 0.19737       |
| Department 44 | 0-4           | 0.72872                 | 0.22340            | 0.04787       | 0.80392                 | 0.18301            | 0.01307       |
|               | 5-9           | 0.93204                 | 0.06796            | 0.00000       | 0.90643                 | 0.08187            | 0.01170       |
|               | 10-14         | 0.82540                 | 0.17460            | 0.00000       | 0.91824                 | 0.08176            | 0.00000       |
|               | 15-19         | 0.88776                 | 0.09184            | 0.02041       | 0.89063                 | 0.09375            | 0.01563       |
|               | 20-24         | 0.74167                 | 0.20833            | 0.05000       | 0.69663                 | 0.23596            | 0.06742       |
|               | 25-29         | 0.66906                 | 0.25180            | 0.07914       | 0.52857                 | 0.28571            | 0.18571       |
|               | 30-34         | 0.54023                 | 0.27586            | 0.18391       | 0.39706                 | 0.32353            | 0.27941       |
|               | 35-39         | 0.40789                 | 0.43421            | 0.15789       | 0.29231                 | 0.38462            | 0.32308       |
|               | 40-44         | 0.50000                 | 0.41429            | 0.08571       | 0.41176                 | 0.49020            | 0.09804       |
|               | 45-49         | 0.45652                 | 0.26087            | 0.28261       | 0.43590                 | 0.30769            | 0.25641       |
|               | 50-54         | 0.43590                 | 0.35897            | 0.20513       | 0.39024                 | 0.41463            | 0.19512       |
|               | 55-59         | 0.54545                 | 0.24242            | 0.21212       | 0.42857                 | 0.42857            | 0.14286       |
|               | Department 47 | 0-4                     | 0.78344            | 0.17197       | 0.04459                 | 0.81304            | 0.15217       |
| 5-9           |               | 0.91892                 | 0.08108            | 0.00000       | 0.89593                 | 0.07692            | 0.02715       |
| 10-14         |               | 0.90588                 | 0.08235            | 0.01176       | 0.87500                 | 0.10500            | 0.02000       |
| 15-19         |               | 0.93617                 | 0.05319            | 0.01064       | 0.84884                 | 0.13372            | 0.01744       |
| 20-24         |               | 0.89423                 | 0.10577            | 0.00000       | 0.69298                 | 0.20175            | 0.10526       |
| 25-29         |               | 0.62791                 | 0.32558            | 0.04651       | 0.70161                 | 0.19355            | 0.10484       |
| 30-34         |               | 0.53165                 | 0.34177            | 0.12658       | 0.58955                 | 0.28358            | 0.12687       |
| 35-39         |               | 0.46479                 | 0.35211            | 0.18310       | 0.50000                 | 0.32955            | 0.17045       |
| 40-44         |               | 0.50000                 | 0.36538            | 0.13462       | 0.38372                 | 0.34884            | 0.26744       |
| 45-49         |               | 0.45098                 | 0.41176            | 0.13725       | 0.38554                 | 0.43373            | 0.18072       |
| 50-54         |               | 0.46667                 | 0.35000            | 0.18333       | 0.48387                 | 0.40323            | 0.11290       |
| 55-59         |               | 0.51163                 | 0.27907            | 0.20930       | 0.52941                 | 0.35294            | 0.11765       |
| Department 70 |               | 0-4                     | 0.79024            | 0.19024       | 0.01951                 | 0.76860            | 0.19835       |
|               | 5-9           | 0.92308                 | 0.06154            | 0.01538       | 0.89362                 | 0.07660            | 0.02979       |
|               | 10-14         | 0.96053                 | 0.03947            | 0.00000       | 0.87600                 | 0.08000            | 0.04400       |
|               | 15-19         | 0.89691                 | 0.08247            | 0.02062       | 0.89545                 | 0.10455            | 0.00000       |
|               | 20-24         | 0.78632                 | 0.15385            | 0.05983       | 0.82051                 | 0.11538            | 0.06410       |
|               | 25-29         | 0.73737                 | 0.24242            | 0.02020       | 0.61029                 | 0.30882            | 0.08088       |
|               | 30-34         | 0.52727                 | 0.39091            | 0.08182       | 0.48276                 | 0.36207            | 0.15517       |
|               | 35-39         | 0.50000                 | 0.39024            | 0.10976       | 0.46465                 | 0.39394            | 0.14141       |
|               | 40-44         | 0.50000                 | 0.40278            | 0.09722       | 0.43860                 | 0.43860            | 0.12281       |
|               | 45-49         | 0.36709                 | 0.43038            | 0.20253       | 0.37500                 | 0.43182            | 0.19318       |
|               | 50-54         | 0.41176                 | 0.37255            | 0.21569       | 0.40789                 | 0.38158            | 0.21053       |
|               | 55-59         | 0.50000                 | 0.28261            | 0.21739       | 0.53448                 | 0.25862            | 0.20690       |

| Departments   | Age group | Not- overweight in 2005 | Overweight in 2005 | Obese in 2005 | Not- overweight in 2010 | Overweight in 2010 | Obese in 2010 |
|---------------|-----------|-------------------------|--------------------|---------------|-------------------------|--------------------|---------------|
| Department 88 | 0-4       | 0.69697                 | 0.27273            | 0.03030       | 0.71560                 | 0.19725            | 0.08716       |
|               | 5-9       | 0.88235                 | 0.05882            | 0.05882       | 0.62762                 | 0.22176            | 0.15063       |
|               | 10-14     | 0.76471                 | 0.17647            | 0.05882       | 0.65625                 | 0.19643            | 0.14732       |
|               | 15-19     | 0.73333                 | 0.26667            | 0.00000       | 0.70899                 | 0.17989            | 0.11111       |
|               | 20-24     | 0.69231                 | 0.23077            | 0.07692       | 0.56742                 | 0.27528            | 0.15730       |
|               | 25-29     | 0.78947                 | 0.15789            | 0.05263       | 0.37989                 | 0.41341            | 0.20670       |
|               | 30-34     | 0.61538                 | 0.23077            | 0.15385       | 0.37423                 | 0.34356            | 0.28221       |
|               | 35-39     | 0.61111                 | 0.22222            | 0.16667       | 0.33951                 | 0.40123            | 0.25926       |
|               | 40-44     | 0.29412                 | 0.35294            | 0.35294       | 0.26147                 | 0.45872            | 0.27982       |
|               | 45-49     | 0.44444                 | 0.27778            | 0.27778       | 0.22335                 | 0.48223            | 0.29442       |
|               | 50-54     | 0.50000                 | 0.10000            | 0.40000       | 0.30519                 | 0.40260            | 0.29221       |
|               | 55-59     | 0.33333                 | 0.50000            | 0.16667       | 0.21495                 | 0.49533            | 0.28972       |

**Table 23. Prevalent rates of middle socioeconomic status population by age group, and body mass index category (Caribe region)**

| Departments   | Age group | Not- overweight in 2005 | Overweight in 2005 | Obese in 2005 | Not- overweight in 2010 | Overweight in 2010 | Obese in 2010 |
|---------------|-----------|-------------------------|--------------------|---------------|-------------------------|--------------------|---------------|
| Department 8  | 0-4       | 0.78824                 | 0.17059            | 0.04118       | 0.75723                 | 0.17919            | 0.06358       |
|               | 5-9       | 0.89655                 | 0.08621            | 0.01724       | 0.80986                 | 0.13380            | 0.05634       |
|               | 10-14     | 0.89041                 | 0.08219            | 0.02740       | 0.76774                 | 0.19355            | 0.03871       |
|               | 15-19     | 0.86813                 | 0.12088            | 0.01099       | 0.76978                 | 0.14388            | 0.08633       |
|               | 20-24     | 0.81065                 | 0.12426            | 0.06509       | 0.73034                 | 0.22472            | 0.04494       |
|               | 25-29     | 0.63830                 | 0.24823            | 0.11348       | 0.57143                 | 0.27473            | 0.15385       |
|               | 30-34     | 0.53846                 | 0.36538            | 0.09615       | 0.46392                 | 0.31959            | 0.21649       |
|               | 35-39     | 0.56075                 | 0.30841            | 0.13084       | 0.29487                 | 0.39744            | 0.30769       |
|               | 40-44     | 0.35238                 | 0.45714            | 0.19048       | 0.27632                 | 0.51316            | 0.21053       |
|               | 45-49     | 0.37374                 | 0.45455            | 0.17172       | 0.28767                 | 0.39726            | 0.31507       |
|               | 50-54     | 0.37143                 | 0.37143            | 0.25714       | 0.45455                 | 0.39394            | 0.15152       |
|               | 55-59     | 0.54000                 | 0.32000            | 0.14000       | 0.41176                 | 0.35294            | 0.23529       |
| Department 13 | 0-4       | 0.80000                 | 0.18667            | 0.01333       | 0.77320                 | 0.19588            | 0.03093       |
|               | 5-9       | 0.90000                 | 0.06667            | 0.03333       | 0.80851                 | 0.17021            | 0.02128       |
|               | 10-14     | 0.87500                 | 0.09375            | 0.03125       | 0.75904                 | 0.21687            | 0.02410       |
|               | 15-19     | 1.00000                 | 0.00000            | 0.00000       | 0.88235                 | 0.09412            | 0.02353       |
|               | 20-24     | 0.84211                 | 0.12281            | 0.03509       | 0.74603                 | 0.15873            | 0.09524       |
|               | 25-29     | 0.72340                 | 0.25532            | 0.02128       | 0.58182                 | 0.30909            | 0.10909       |
|               | 30-34     | 0.42857                 | 0.44898            | 0.12245       | 0.51724                 | 0.29310            | 0.18966       |
|               | 35-39     | 0.49020                 | 0.29412            | 0.21569       | 0.34426                 | 0.44262            | 0.21311       |
|               | 40-44     | 0.55556                 | 0.25000            | 0.19444       | 0.37288                 | 0.42373            | 0.20339       |
|               | 45-49     | 0.48148                 | 0.44444            | 0.07407       | 0.32353                 | 0.44118            | 0.23529       |
|               | 50-54     | 0.40741                 | 0.29630            | 0.29630       | 0.62069                 | 0.20690            | 0.17241       |
|               | 55-59     | 0.25000                 | 0.50000            | 0.25000       | 0.40000                 | 0.36667            | 0.23333       |
| Department 20 | 0-4       | 0.76667                 | 0.22222            | 0.01111       | 0.81169                 | 0.14286            | 0.04545       |
|               | 5-9       | 0.81818                 | 0.12727            | 0.05455       | 0.86364                 | 0.07576            | 0.06061       |
|               | 10-14     | 0.90566                 | 0.07547            | 0.01887       | 0.85616                 | 0.10274            | 0.04110       |
|               | 15-19     | 0.84211                 | 0.14474            | 0.01316       | 0.86923                 | 0.10769            | 0.02308       |
|               | 20-24     | 0.77333                 | 0.18667            | 0.04000       | 0.70330                 | 0.23077            | 0.06593       |



| Departments   | Age group     | Not- overweight in 2005 | Overweight in 2005 | Obese in 2005 | Not- overweight in 2010 | Overweight in 2010 | Obese in 2010 |
|---------------|---------------|-------------------------|--------------------|---------------|-------------------------|--------------------|---------------|
|               | 25-29         | 0.66234                 | 0.24675            | 0.09091       | 0.61053                 | 0.28421            | 0.10526       |
|               | 30-34         | 0.42373                 | 0.45763            | 0.11864       | 0.44048                 | 0.42857            | 0.13095       |
|               | 35-39         | 0.44776                 | 0.37313            | 0.17910       | 0.36000                 | 0.41333            | 0.22667       |
|               | 40-44         | 0.43636                 | 0.38182            | 0.18182       | 0.33333                 | 0.35556            | 0.31111       |
|               | 45-49         | 0.32692                 | 0.42308            | 0.25000       | 0.33929                 | 0.42857            | 0.23214       |
|               | 50-54         | 0.43590                 | 0.38462            | 0.17949       | 0.24242                 | 0.54545            | 0.21212       |
|               | 55-59         | 0.32500                 | 0.40000            | 0.27500       | 0.22727                 | 0.45455            | 0.31818       |
| Department 23 | 0-4           | 0.81579                 | 0.15789            | 0.02632       | 0.75000                 | 0.18750            | 0.06250       |
|               | 5-9           | 0.80000                 | 0.08000            | 0.12000       | 0.85714                 | 0.11429            | 0.02857       |
|               | 10-14         | 0.83871                 | 0.12903            | 0.03226       | 0.85000                 | 0.10000            | 0.05000       |
|               | 15-19         | 0.77143                 | 0.11429            | 0.11429       | 0.89362                 | 0.08511            | 0.02128       |
|               | 20-24         | 0.80952                 | 0.19048            | 0.00000       | 0.71429                 | 0.20000            | 0.08571       |
|               | 25-29         | 0.67568                 | 0.16216            | 0.16216       | 0.75000                 | 0.08333            | 0.16667       |
|               | 30-34         | 0.64865                 | 0.27027            | 0.08108       | 0.41667                 | 0.37500            | 0.20833       |
|               | 35-39         | 0.51613                 | 0.38710            | 0.09677       | 0.52000                 | 0.36000            | 0.12000       |
|               | 40-44         | 0.35714                 | 0.50000            | 0.14286       | 0.43333                 | 0.40000            | 0.16667       |
|               | 45-49         | 0.42105                 | 0.47368            | 0.10526       | 0.21739                 | 0.52174            | 0.26087       |
|               | 50-54         | 0.33333                 | 0.46667            | 0.20000       | 0.45833                 | 0.25000            | 0.29167       |
|               | 55-59         | 0.25000                 | 0.50000            | 0.25000       | 0.05556                 | 0.38889            | 0.55556       |
|               | Department 44 | 0-4                     | 0.67677            | 0.27273       | 0.05051                 | 0.87952            | 0.07229       |
| 5-9           |               | 0.88372                 | 0.06977            | 0.04651       | 0.85047                 | 0.13084            | 0.01869       |
| 10-14         |               | 0.88235                 | 0.11765            | 0.00000       | 0.87619                 | 0.10476            | 0.01905       |
| 15-19         |               | 0.91781                 | 0.04110            | 0.04110       | 0.83784                 | 0.12162            | 0.04054       |
| 20-24         |               | 0.70588                 | 0.25490            | 0.03922       | 0.70968                 | 0.20968            | 0.08065       |
| 25-29         |               | 0.61628                 | 0.25581            | 0.12791       | 0.51667                 | 0.35000            | 0.13333       |
| 30-34         |               | 0.50000                 | 0.39394            | 0.10606       | 0.46000                 | 0.26000            | 0.28000       |
| 35-39         |               | 0.40580                 | 0.40580            | 0.18841       | 0.33962                 | 0.37736            | 0.28302       |
| 40-44         |               | 0.37705                 | 0.42623            | 0.19672       | 0.34884                 | 0.44186            | 0.20930       |
| 45-49         |               | 0.25490                 | 0.41176            | 0.33333       | 0.27907                 | 0.48837            | 0.23256       |
| 50-54         |               | 0.28205                 | 0.48718            | 0.23077       | 0.42308                 | 0.19231            | 0.38462       |
| 55-59         |               | 0.34375                 | 0.40625            | 0.25000       | 0.35294                 | 0.35294            | 0.29412       |
| Department 47 |               | 0-4                     | 0.74359            | 0.16667       | 0.08974                 | 0.87640            | 0.11236       |
|               | 5-9           | 0.81395                 | 0.09302            | 0.09302       | 0.86517                 | 0.12360            | 0.01124       |
|               | 10-14         | 0.91667                 | 0.08333            | 0.00000       | 0.86486                 | 0.12162            | 0.01351       |
|               | 15-19         | 0.81818                 | 0.13636            | 0.04545       | 0.87952                 | 0.12048            | 0.00000       |
|               | 20-24         | 0.76667                 | 0.21667            | 0.01667       | 0.81132                 | 0.15094            | 0.03774       |
|               | 25-29         | 0.58000                 | 0.24000            | 0.18000       | 0.63636                 | 0.30303            | 0.06061       |
|               | 30-34         | 0.45098                 | 0.45098            | 0.09804       | 0.47170                 | 0.33962            | 0.18868       |
|               | 35-39         | 0.40816                 | 0.38776            | 0.20408       | 0.53333                 | 0.26667            | 0.20000       |
|               | 40-44         | 0.43860                 | 0.38596            | 0.17544       | 0.34694                 | 0.30612            | 0.34694       |
|               | 45-49         | 0.26667                 | 0.50000            | 0.23333       | 0.30189                 | 0.58491            | 0.11321       |
|               | 50-54         | 0.38889                 | 0.27778            | 0.33333       | 0.28261                 | 0.45652            | 0.26087       |
|               | 55-59         | 0.33333                 | 0.33333            | 0.33333       | 0.37500                 | 0.42500            | 0.20000       |
|               | Department 70 | 0-4                     | 0.78689            | 0.14754       | 0.06557                 | 0.83544            | 0.12658       |
| 5-9           |               | 0.82857                 | 0.14286            | 0.02857       | 0.87805                 | 0.09756            | 0.02439       |

| Departments   | Age group | Not- overweight in 2005 | Overweight in 2005 | Obese in 2005 | Not- overweight in 2010 | Overweight in 2010 | Obese in 2010 |
|---------------|-----------|-------------------------|--------------------|---------------|-------------------------|--------------------|---------------|
|               | 10-14     | 0.85714                 | 0.14286            | 0.00000       | 0.87629                 | 0.12371            | 0.00000       |
|               | 15-19     | 0.87179                 | 0.07692            | 0.05128       | 0.93421                 | 0.05263            | 0.01316       |
|               | 20-24     | 0.88000                 | 0.12000            | 0.00000       | 0.81538                 | 0.15385            | 0.03077       |
|               | 25-29     | 0.65517                 | 0.29310            | 0.05172       | 0.57407                 | 0.25926            | 0.16667       |
|               | 30-34     | 0.48148                 | 0.27778            | 0.24074       | 0.47458                 | 0.45763            | 0.06780       |
|               | 35-39     | 0.47059                 | 0.41176            | 0.11765       | 0.47222                 | 0.34722            | 0.18056       |
|               | 40-44     | 0.40000                 | 0.45000            | 0.15000       | 0.48889                 | 0.31111            | 0.20000       |
|               | 45-49     | 0.38776                 | 0.28571            | 0.32653       | 0.28261                 | 0.47826            | 0.23913       |
|               | 50-54     | 0.45652                 | 0.36957            | 0.17391       | 0.50000                 | 0.29412            | 0.20588       |
|               | 55-59     | 0.55556                 | 0.16667            | 0.27778       | 0.45161                 | 0.29032            | 0.25806       |
| Department 88 | 0-4       | 0.48387                 | 0.35484            | 0.16129       | 0.69231                 | 0.23077            | 0.07692       |
|               | 5-9       | 0.60000                 | 0.20000            | 0.20000       | 0.59091                 | 0.18182            | 0.22727       |
|               | 10-14     | 0.46154                 | 0.38462            | 0.15385       | 0.52941                 | 0.29412            | 0.17647       |
|               | 15-19     | 0.58333                 | 0.08333            | 0.33333       | 0.78571                 | 0.00000            | 0.21429       |
|               | 20-24     | 0.73913                 | 0.17391            | 0.08696       | 0.50000                 | 0.50000            | 0.00000       |
|               | 25-29     | 0.30769                 | 0.53846            | 0.15385       | 0.54167                 | 0.33333            | 0.12500       |
|               | 30-34     | 0.36364                 | 0.40909            | 0.22727       | 0.42308                 | 0.46154            | 0.11538       |
|               | 35-39     | 0.35714                 | 0.32143            | 0.32143       | 0.31579                 | 0.36842            | 0.31579       |
|               | 40-44     | 0.40000                 | 0.40000            | 0.20000       | 0.35294                 | 0.41176            | 0.23529       |
|               | 45-49     | 0.15789                 | 0.52632            | 0.31579       | 0.32000                 | 0.36000            | 0.32000       |
|               | 50-54     | 0.34483                 | 0.27586            | 0.37931       | 0.07692                 | 0.53846            | 0.38462       |
|               | 55-59     | 0.00000                 | 0.72727            | 0.27273       | 0.22222                 | 0.38889            | 0.38889       |

**Table 24. Prevalent rates of higher socioeconomic status population by age group, and body mass index category (Caribe region)**

| Departments   | Age group | Not- overweight in 2005 | Overweight in 2005 | Obese in 2005 | Not- overweight in 2010 | Overweight in 2010 | Obese in 2010 |
|---------------|-----------|-------------------------|--------------------|---------------|-------------------------|--------------------|---------------|
| Department 8  | 0-4       | 0.72826                 | 0.20652            | 0.06522       | 0.62842                 | 0.26776            | 0.10383       |
|               | 5-9       | 0.74390                 | 0.13415            | 0.12195       | 0.69780                 | 0.17582            | 0.12637       |
|               | 10-14     | 0.68132                 | 0.24176            | 0.07692       | 0.73729                 | 0.16102            | 0.10169       |
|               | 15-19     | 0.81379                 | 0.14483            | 0.04138       | 0.76279                 | 0.17209            | 0.06512       |
|               | 20-24     | 0.72961                 | 0.20601            | 0.06438       | 0.71503                 | 0.21762            | 0.06736       |
|               | 25-29     | 0.60989                 | 0.28022            | 0.10989       | 0.49306                 | 0.34028            | 0.16667       |
|               | 30-34     | 0.41808                 | 0.36158            | 0.22034       | 0.37500                 | 0.37500            | 0.25000       |
|               | 35-39     | 0.40000                 | 0.42581            | 0.17419       | 0.33088                 | 0.41912            | 0.25000       |
|               | 40-44     | 0.35526                 | 0.39474            | 0.25000       | 0.31081                 | 0.40541            | 0.28378       |
|               | 45-49     | 0.36301                 | 0.41781            | 0.21918       | 0.28358                 | 0.44030            | 0.27612       |
|               | 50-54     | 0.25833                 | 0.42500            | 0.31667       | 0.23333                 | 0.45833            | 0.30833       |
| 55-59         | 0.23762   | 0.53465                 | 0.22772            | 0.18868       | 0.44340                 | 0.36792            |               |
| Department 13 | 0-4       | 0.77273                 | 0.14773            | 0.07955       | 0.69159                 | 0.25234            | 0.05607       |
|               | 5-9       | 0.82927                 | 0.12195            | 0.04878       | 0.72807                 | 0.17544            | 0.09649       |
|               | 10-14     | 0.79032                 | 0.14516            | 0.06452       | 0.78226                 | 0.11290            | 0.10484       |
|               | 15-19     | 0.86364                 | 0.12500            | 0.01136       | 0.83740                 | 0.09756            | 0.06504       |
|               | 20-24     | 0.88235                 | 0.08403            | 0.03361       | 0.72269                 | 0.17647            | 0.10084       |

| Departments   | Age group     | Not- overweight in 2005 | Overweight in 2005 | Obese in 2005 | Not- overweight in 2010 | Overweight in 2010 | Obese in 2010 |         |
|---------------|---------------|-------------------------|--------------------|---------------|-------------------------|--------------------|---------------|---------|
|               | 25-29         | 0.67442                 | 0.27907            | 0.04651       | 0.49462                 | 0.37634            | 0.12903       |         |
|               | 30-34         | 0.54545                 | 0.31818            | 0.13636       | 0.45882                 | 0.34118            | 0.20000       |         |
|               | 35-39         | 0.50000                 | 0.35897            | 0.14103       | 0.39241                 | 0.39241            | 0.21519       |         |
|               | 40-44         | 0.39130                 | 0.46377            | 0.14493       | 0.31183                 | 0.46237            | 0.22581       |         |
|               | 45-49         | 0.32990                 | 0.42268            | 0.24742       | 0.26506                 | 0.48193            | 0.25301       |         |
|               | 50-54         | 0.37681                 | 0.31884            | 0.30435       | 0.23913                 | 0.50000            | 0.26087       |         |
|               | 55-59         | 0.28302                 | 0.39623            | 0.32075       | 0.33333                 | 0.37879            | 0.28788       |         |
| Department 20 | 0-4           | 0.76923                 | 0.18462            | 0.04615       | 0.80303                 | 0.12121            | 0.07576       |         |
|               | 5-9           | 0.76923                 | 0.15385            | 0.07692       | 0.67949                 | 0.16667            | 0.15385       |         |
|               | 10-14         | 0.88889                 | 0.03704            | 0.07407       | 0.75962                 | 0.18269            | 0.05769       |         |
|               | 15-19         | 0.86364                 | 0.12121            | 0.01515       | 0.82353                 | 0.13235            | 0.04412       |         |
|               | 20-24         | 0.75000                 | 0.20833            | 0.04167       | 0.63077                 | 0.26154            | 0.10769       |         |
|               | 25-29         | 0.68182                 | 0.21212            | 0.10606       | 0.47059                 | 0.39706            | 0.13235       |         |
|               | 30-34         | 0.43860                 | 0.47368            | 0.08772       | 0.32203                 | 0.44068            | 0.23729       |         |
|               | 35-39         | 0.28302                 | 0.45283            | 0.26415       | 0.25455                 | 0.58182            | 0.16364       |         |
|               | 40-44         | 0.35593                 | 0.44068            | 0.20339       | 0.35897                 | 0.35897            | 0.28205       |         |
|               | 45-49         | 0.27660                 | 0.40426            | 0.31915       | 0.30000                 | 0.48000            | 0.22000       |         |
|               | 50-54         | 0.27273                 | 0.30303            | 0.42424       | 0.18605                 | 0.46512            | 0.34884       |         |
|               | 55-59         | 0.15625                 | 0.53125            | 0.31250       | 0.22500                 | 0.50000            | 0.27500       |         |
|               | Department 23 | 0-4                     | 0.75000            | 0.17857       | 0.07143                 | 0.82759            | 0.06897       | 0.10345 |
|               |               | 5-9                     | 0.84615            | 0.07692       | 0.07692                 | 0.68571            | 0.25714       | 0.05714 |
| 10-14         |               | 0.84211                 | 0.15789            | 0.00000       | 0.75000                 | 0.21875            | 0.03125       |         |
| 15-19         |               | 0.78571                 | 0.19048            | 0.02381       | 0.74468                 | 0.25532            | 0.00000       |         |
| 20-24         |               | 0.75439                 | 0.17544            | 0.07018       | 0.62500                 | 0.30000            | 0.07500       |         |
| 25-29         |               | 0.70000                 | 0.23333            | 0.06667       | 0.50000                 | 0.29545            | 0.20455       |         |
| 30-34         |               | 0.51429                 | 0.40000            | 0.08571       | 0.46429                 | 0.39286            | 0.14286       |         |
| 35-39         |               | 0.34375                 | 0.37500            | 0.28125       | 0.40741                 | 0.33333            | 0.25926       |         |
| 40-44         |               | 0.50000                 | 0.47059            | 0.02941       | 0.41667                 | 0.41667            | 0.16667       |         |
| 45-49         |               | 0.39394                 | 0.48485            | 0.12121       | 0.17143                 | 0.62857            | 0.20000       |         |
| 50-54         |               | 0.09375                 | 0.65625            | 0.25000       | 0.10714                 | 0.35714            | 0.53571       |         |
| 55-59         |               | 0.30769                 | 0.34615            | 0.34615       | 0.07692                 | 0.46154            | 0.46154       |         |
| Department 44 |               | 0-4                     | 0.63077            | 0.27692       | 0.09231                 | 0.70213            | 0.25532       | 0.04255 |
|               |               | 5-9                     | 0.62963            | 0.25926       | 0.11111                 | 0.67857            | 0.21429       | 0.10714 |
|               | 10-14         | 0.75000                 | 0.19444            | 0.05556       | 0.77966                 | 0.11864            | 0.10169       |         |
|               | 15-19         | 0.90196                 | 0.09804            | 0.00000       | 0.79245                 | 0.16981            | 0.03774       |         |
|               | 20-24         | 0.54412                 | 0.33824            | 0.11765       | 0.59375                 | 0.34375            | 0.06250       |         |
|               | 25-29         | 0.58333                 | 0.33333            | 0.08333       | 0.40000                 | 0.35556            | 0.24444       |         |
|               | 30-34         | 0.31481                 | 0.53704            | 0.14815       | 0.38710                 | 0.25806            | 0.35484       |         |
|               | 35-39         | 0.52000                 | 0.32000            | 0.16000       | 0.19231                 | 0.57692            | 0.23077       |         |
|               | 40-44         | 0.26471                 | 0.44118            | 0.29412       | 0.44000                 | 0.32000            | 0.24000       |         |
|               | 45-49         | 0.22917                 | 0.56250            | 0.20833       | 0.24000                 | 0.60000            | 0.16000       |         |
|               | 50-54         | 0.20000                 | 0.42857            | 0.37143       | 0.17857                 | 0.50000            | 0.32143       |         |
|               | 55-59         | 0.17241                 | 0.44828            | 0.37931       | 0.14286                 | 0.57143            | 0.28571       |         |
|               | Department 47 | 0-4                     | 0.75926            | 0.18519       | 0.05556                 | 0.67347            | 0.22449       | 0.10204 |
|               |               | 5-9                     | 0.61538            | 0.26923       | 0.11538                 | 0.58333            | 0.18333       | 0.23333 |

| Departments   | Age group | Not- overweight in 2005 | Overweight in 2005 | Obese in 2005 | Not- overweight in 2010 | Overweight in 2010 | Obese in 2010 |
|---------------|-----------|-------------------------|--------------------|---------------|-------------------------|--------------------|---------------|
|               | 10-14     | 0.88462                 | 0.11538            | 0.00000       | 0.64063                 | 0.21875            | 0.14063       |
|               | 15-19     | 0.86047                 | 0.11628            | 0.02326       | 0.74194                 | 0.20968            | 0.04839       |
|               | 20-24     | 0.69231                 | 0.21538            | 0.09231       | 0.67568                 | 0.18919            | 0.13514       |
|               | 25-29     | 0.56410                 | 0.29487            | 0.14103       | 0.48936                 | 0.31915            | 0.19149       |
|               | 30-34     | 0.41463                 | 0.36585            | 0.21951       | 0.30556                 | 0.47222            | 0.22222       |
|               | 35-39     | 0.49123                 | 0.40351            | 0.10526       | 0.39535                 | 0.37209            | 0.23256       |
|               | 40-44     | 0.42000                 | 0.34000            | 0.24000       | 0.17778                 | 0.42222            | 0.40000       |
|               | 45-49     | 0.14286                 | 0.50000            | 0.35714       | 0.37209                 | 0.46512            | 0.16279       |
|               | 50-54     | 0.35556                 | 0.37778            | 0.26667       | 0.16279                 | 0.58140            | 0.25581       |
|               | 55-59     | 0.35897                 | 0.33333            | 0.30769       | 0.22581                 | 0.45161            | 0.32258       |
| Department 70 | 0-4       | 0.82353                 | 0.09412            | 0.08235       | 0.81250                 | 0.15625            | 0.03125       |
|               | 5-9       | 0.63333                 | 0.33333            | 0.03333       | 0.75904                 | 0.20482            | 0.03614       |
|               | 10-14     | 0.80000                 | 0.14286            | 0.05714       | 0.72826                 | 0.13043            | 0.14130       |
|               | 15-19     | 0.86364                 | 0.11364            | 0.02273       | 0.83000                 | 0.13000            | 0.04000       |
|               | 20-24     | 0.70513                 | 0.26923            | 0.02564       | 0.76364                 | 0.16364            | 0.07273       |
|               | 25-29     | 0.56522                 | 0.33333            | 0.10145       | 0.37500                 | 0.44643            | 0.17857       |
|               | 30-34     | 0.49057                 | 0.41509            | 0.09434       | 0.51724                 | 0.34483            | 0.13793       |
|               | 35-39     | 0.37681                 | 0.40580            | 0.21739       | 0.37333                 | 0.48000            | 0.14667       |
|               | 40-44     | 0.35593                 | 0.42373            | 0.22034       | 0.25424                 | 0.50847            | 0.23729       |
|               | 45-49     | 0.19565                 | 0.36957            | 0.43478       | 0.22449                 | 0.53061            | 0.24490       |
|               | 50-54     | 0.13636                 | 0.59091            | 0.27273       | 0.28333                 | 0.40000            | 0.31667       |
| Department 88 | 0-4       | 0.31111                 | 0.48889            | 0.20000       | 0.20930                 | 0.55814            | 0.23256       |
|               | 5-9       | 0.78571                 | 0.14286            | 0.07143       | 0.50000                 | 0.33333            | 0.16667       |
|               | 10-14     | 0.36364                 | 0.54545            | 0.09091       | 0.40000                 | 0.40000            | 0.20000       |
|               | 15-19     | 0.81818                 | 0.18182            | 0.00000       | 0.50000                 | 0.33333            | 0.16667       |
|               | 20-24     | 0.64286                 | 0.28571            | 0.07143       | 0.16667                 | 0.33333            | 0.50000       |
|               | 25-29     | 0.61905                 | 0.23810            | 0.14286       | 0.33333                 | 0.33333            | 0.33333       |
|               | 30-34     | 0.45833                 | 0.20833            | 0.33333       | 0.50000                 | 0.30000            | 0.20000       |
|               | 35-39     | 0.13043                 | 0.52174            | 0.34783       | 0.30769                 | 0.46154            | 0.23077       |
|               | 40-44     | 0.33333                 | 0.45833            | 0.20833       | 0.14286                 | 0.42857            | 0.42857       |
|               | 45-49     | 0.29167                 | 0.37500            | 0.33333       | 0.37500                 | 0.50000            | 0.12500       |
|               | 50-54     | 0.34615                 | 0.53846            | 0.11538       | 0.27273                 | 0.54545            | 0.18182       |
| 55-59         | 0.21053   | 0.47368                 | 0.31579            | 0.11111       | 0.55556                 | 0.33333            |               |
|               | 55-59     | 0.35294                 | 0.41176            | 0.23529       | 0.00000                 | 0.83333            | 0.16667       |

**Table 25. Mortality rates and population size by age group at the department level without segregate by socioeconomic status (Caribe region) †**

| Departments  | Age group | Mortality rates (R) (%/year) | Not- overweight population in 2005 (Number of people)1 | Overweight population in 2005 (Number of people)2 | Obese population in 2005 (Number of people)3 |
|--------------|-----------|------------------------------|--------------------------------------------------------|---------------------------------------------------|----------------------------------------------|
| Department 8 | 0-4       | 0.01938                      | 158802                                                 | 39701                                             | 8411                                         |
|              | 5-9       | 0.00050                      | 175670                                                 | 18543                                             | 11711                                        |
|              | 10-14     | 0.00045                      | 168986                                                 | 27174                                             | 8492                                         |
|              | 15-19     | 0.00144                      | 177237                                                 | 20851                                             | 3841                                         |

| Departments   | Age group     | Mortality rates (R) (%/year) | Not- overweight population in 2005 (Number of people)1 | Overweight population in 2005 (Number of people)2 | Obese population in 2005 (Number of people)3 |
|---------------|---------------|------------------------------|--------------------------------------------------------|---------------------------------------------------|----------------------------------------------|
|               | 20-24         | 0.00314                      | 151239                                                 | 31822                                             | 10170                                        |
|               | 25-29         | 0.00362                      | 103166                                                 | 46312                                             | 19579                                        |
|               | 30-34         | 0.00373                      | 76965                                                  | 47160                                             | 22259                                        |
|               | 35-39         | 0.00360                      | 74259                                                  | 51470                                             | 21217                                        |
|               | 40-44         | 0.00450                      | 60134                                                  | 53369                                             | 27060                                        |
|               | 45-49         | 0.00525                      | 44781                                                  | 45139                                             | 24003                                        |
|               | 50-54         | 0.00763                      | 33602                                                  | 32284                                             | 23390                                        |
|               | 55-59         | 0.01129                      | 25793                                                  | 28544                                             | 13756                                        |
| Department 13 | 0-4           | 0.00398                      | 121669                                                 | 21534                                             | 5384                                         |
|               | 5-9           | 0.00020                      | 131004                                                 | 15948                                             | 5696                                         |
|               | 10-14         | 0.00024                      | 127074                                                 | 16456                                             | 6399                                         |
|               | 15-19         | 0.00085                      | 128558                                                 | 8815                                              | 1469                                         |
|               | 20-24         | 0.00129                      | 106653                                                 | 13566                                             | 6081                                         |
|               | 25-29         | 0.00141                      | 79035                                                  | 27443                                             | 4940                                         |
|               | 30-34         | 0.00144                      | 52668                                                  | 33214                                             | 12811                                        |
|               | 35-39         | 0.00145                      | 50616                                                  | 32900                                             | 13666                                        |
|               | 40-44         | 0.00193                      | 44329                                                  | 31081                                             | 13757                                        |
|               | 45-49         | 0.00286                      | 29328                                                  | 30154                                             | 13218                                        |
|               | 50-54         | 0.00338                      | 27228                                                  | 16756                                             | 12567                                        |
|               | 55-59         | 0.00512                      | 16764                                                  | 17582                                             | 10222                                        |
|               | Department 20 | 0-4                          | 0.00407                                                | 61799                                             | 12086                                        |
| 5-9           |               | 0.00030                      | 63879                                                  | 8901                                              | 3142                                         |
| 10-14         |               | 0.00028                      | 69382                                                  | 3679                                              | 2102                                         |
| 15-19         |               | 0.00084                      | 58173                                                  | 8573                                              | 1225                                         |
| 20-24         |               | 0.00215                      | 42807                                                  | 10084                                             | 2470                                         |
| 25-29         |               | 0.00230                      | 34014                                                  | 11055                                             | 4890                                         |
| 30-34         |               | 0.00230                      | 23088                                                  | 16711                                             | 4618                                         |
| 35-39         |               | 0.00237                      | 17984                                                  | 16729                                             | 7946                                         |
| 40-44         |               | 0.00281                      | 16554                                                  | 14689                                             | 6062                                         |
| 45-49         |               | 0.00328                      | 9691                                                   | 13528                                             | 6663                                         |
| 50-54         |               | 0.00504                      | 9930                                                   | 8164                                              | 5296                                         |
| 55-59         |               | 0.00651                      | 6095                                                   | 7238                                              | 4952                                         |
| Department 23 |               | 0-4                          | 0.01525                                                | 65180                                             | 12393                                        |
|               | 5-9           | 0.00109                      | 67508                                                  | 7418                                              | 5193                                         |
|               | 10-14         | 0.00110                      | 75442                                                  | 6723                                              | 1494                                         |
|               | 15-19         | 0.00399                      | 63497                                                  | 10499                                             | 2500                                         |
|               | 20-24         | 0.00906                      | 53375                                                  | 10543                                             | 2306                                         |
|               | 25-29         | 0.01093                      | 40139                                                  | 12961                                             | 4181                                         |
|               | 30-34         | 0.01080                      | 28747                                                  | 16660                                             | 4573                                         |
|               | 35-39         | 0.01026                      | 26376                                                  | 15825                                             | 9043                                         |
|               | 40-44         | 0.01329                      | 20481                                                  | 18466                                             | 7722                                         |
|               | 45-49         | 0.01586                      | 17831                                                  | 15974                                             | 4086                                         |
|               | 50-54         | 0.02344                      | 9589                                                   | 13819                                             | 6205                                         |
|               | 55-59         | 0.03450                      | 9510                                                   | 8111                                              | 4755                                         |
|               | Department    | 0-4                          | 0.00440                                                | 34473                                             | 12241                                        |

| Departments   | Age group | Mortality rates (R) (%/year) | Not- overweight population in 2005 (Number of people)1 | Overweight population in 2005 (Number of people)2 | Obese population in 2005 (Number of people)3 |
|---------------|-----------|------------------------------|--------------------------------------------------------|---------------------------------------------------|----------------------------------------------|
| 44            | 5-9       | 0.00027                      | 38220                                                  | 4303                                              | 1266                                         |
|               | 10-14     | 0.00035                      | 32445                                                  | 6549                                              | 595                                          |
|               | 15-19     | 0.00085                      | 36989                                                  | 3144                                              | 925                                          |
|               | 20-24     | 0.00242                      | 23393                                                  | 8743                                              | 2127                                         |
|               | 25-29     | 0.00217                      | 18637                                                  | 8030                                              | 2776                                         |
|               | 30-34     | 0.00243                      | 11175                                                  | 9101                                              | 3571                                         |
|               | 35-39     | 0.00260                      | 10057                                                  | 9110                                              | 3904                                         |
|               | 40-44     | 0.00225                      | 7802                                                   | 8726                                              | 3901                                         |
|               | 45-49     | 0.00271                      | 5262                                                   | 7016                                              | 4678                                         |
|               | 50-54     | 0.00425                      | 3792                                                   | 5201                                              | 3251                                         |
|               | 55-59     | 0.00544                      | 3523                                                   | 3523                                              | 2694                                         |
| Department 47 | 0-4       | 0.00367                      | 71559                                                  | 16117                                             | 5480                                         |
|               | 5-9       | 0.00045                      | 78818                                                  | 11260                                             | 4636                                         |
|               | 10-14     | 0.00036                      | 78621                                                  | 7609                                              | 507                                          |
|               | 15-19     | 0.00077                      | 69426                                                  | 6899                                              | 1725                                         |
|               | 20-24     | 0.00126                      | 54854                                                  | 11328                                             | 2087                                         |
|               | 25-29     | 0.00154                      | 36590                                                  | 18151                                             | 6915                                         |
|               | 30-34     | 0.00157                      | 26317                                                  | 20861                                             | 7702                                         |
|               | 35-39     | 0.00173                      | 24083                                                  | 19920                                             | 8622                                         |
|               | 40-44     | 0.00215                      | 21299                                                  | 17158                                             | 8579                                         |
|               | 45-49     | 0.00280                      | 11704                                                  | 18031                                             | 9173                                         |
|               | 50-54     | 0.00451                      | 12884                                                  | 10863                                             | 7326                                         |
| 55-59         | 0.00626   | 9886                         | 7469                                                   | 6591                                              |                                              |
| Department 70 | 0-4       | 0.00295                      | 40868                                                  | 8174                                              | 2189                                         |
|               | 5-9       | 0.00022                      | 45197                                                  | 7951                                              | 1255                                         |
|               | 10-14     | 0.00029                      | 50356                                                  | 4997                                              | 769                                          |
|               | 15-19     | 0.00047                      | 44795                                                  | 4508                                              | 1409                                         |
|               | 20-24     | 0.00110                      | 33633                                                  | 7579                                              | 1421                                         |
|               | 25-29     | 0.00139                      | 24874                                                  | 10613                                             | 1990                                         |
|               | 30-34     | 0.00124                      | 16823                                                  | 12235                                             | 4129                                         |
|               | 35-39     | 0.00178                      | 15398                                                  | 13706                                             | 5076                                         |
|               | 40-44     | 0.00164                      | 12988                                                  | 12811                                             | 4626                                         |
|               | 45-49     | 0.00281                      | 8282                                                   | 9444                                              | 7556                                         |
|               | 50-54     | 0.00387                      | 6860                                                   | 8861                                              | 4431                                         |
| 55-59         | 0.00514   | 7136                         | 5769                                                   | 3644                                              |                                              |
| Department 88 | 0-4       | 0.00204                      | 2873                                                   | 1149                                              | 383                                          |
|               | 5-9       | 0.00021                      | 3082                                                   | 1110                                              | 493                                          |
|               | 10-14     | 0.00040                      | 3376                                                   | 1206                                              | 362                                          |
|               | 15-19     | 0.00084                      | 3121                                                   | 1040                                              | 578                                          |
|               | 20-24     | 0.00207                      | 2988                                                   | 934                                               | 436                                          |
|               | 25-29     | 0.00075                      | 1970                                                   | 1275                                              | 753                                          |
|               | 30-34     | 0.00086                      | 1142                                                   | 1442                                              | 901                                          |
|               | 35-39     | 0.00190                      | 1748                                                   | 1447                                              | 1025                                         |
|               | 40-44     | 0.00244                      | 1501                                                   | 1705                                              | 1296                                         |
| 45-49         | 0.00359   | 1149                         | 1666                                                   | 804                                               |                                              |

| Departments | Age group | Mortality rates (R) (%/year) | Not- overweight population in 2005 (Number of people)1 | Overweight population in 2005 (Number of people)2 | Obese population in 2005 (Number of people)3 |
|-------------|-----------|------------------------------|--------------------------------------------------------|---------------------------------------------------|----------------------------------------------|
|             | 50-54     | 0.00436                      | 826                                                    | 782                                               | 913                                          |
|             | 55-59     | 0.00848                      | 388                                                    | 874                                               | 388                                          |

†Values used in this table are for the urban population

<sup>1</sup> Initial value used in the stock of not-overweight population in 2005.

<sup>2</sup> Initial value used in the stock of overweight population in 2005.

<sup>3</sup> Initial value used in the stock of obese population in 2005.

**Table 26. Mortality rates and population size by age group at the department level for the lower socioeconomic status population (Caribe region) †**

| Departments   | Age group | Mortality rates (R) (%/year) | Not- overweight population in 2005 (Number of people)1 | Overweight population in 2005 (Number of people)2 | Obese population in 2005 (Number of people)3 |
|---------------|-----------|------------------------------|--------------------------------------------------------|---------------------------------------------------|----------------------------------------------|
| Department 8  | 0-4       | 0.01938                      | 67394                                                  | 16849                                             | 3570                                         |
|               | 5-9       | 0.00050                      | 59112                                                  | 6240                                              | 3941                                         |
|               | 10-14     | 0.00045                      | 53991                                                  | 8682                                              | 2713                                         |
|               | 15-19     | 0.00144                      | 63574                                                  | 7479                                              | 1378                                         |
|               | 20-24     | 0.00314                      | 48016                                                  | 10103                                             | 3229                                         |
|               | 25-29     | 0.00362                      | 28951                                                  | 12996                                             | 5494                                         |
|               | 30-34     | 0.00373                      | 21225                                                  | 13005                                             | 6139                                         |
|               | 35-39     | 0.00360                      | 22238                                                  | 15414                                             | 6354                                         |
|               | 40-44     | 0.00450                      | 18812                                                  | 16696                                             | 8465                                         |
|               | 45-49     | 0.00525                      | 10280                                                  | 10362                                             | 5510                                         |
| Department 13 | 50-54     | 0.00763                      | 10043                                                  | 9650                                              | 6991                                         |
|               | 55-59     | 0.01129                      | 6123                                                   | 6776                                              | 3265                                         |
|               | 0-4       | 0.00398                      | 52759                                                  | 6999                                              | 1077                                         |
|               | 5-9       | 0.00020                      | 61515                                                  | 7974                                              | 2278                                         |
|               | 10-14     | 0.00024                      | 56680                                                  | 5485                                              | 1828                                         |
|               | 15-19     | 0.00085                      | 43343                                                  | 735                                               | 735                                          |
|               | 20-24     | 0.00129                      | 35083                                                  | 5613                                              | 3274                                         |
|               | 25-29     | 0.00141                      | 28540                                                  | 7684                                              | 2195                                         |
|               | 30-34     | 0.00144                      | 19929                                                  | 9490                                              | 4270                                         |
|               | 35-39     | 0.00145                      | 18222                                                  | 11135                                             | 2531                                         |
| Department 20 | 40-44     | 0.00193                      | 20381                                                  | 10191                                             | 5095                                         |
|               | 45-49     | 0.00286                      | 10740                                                  | 8261                                              | 2478                                         |
|               | 50-54     | 0.00338                      | 11729                                                  | 4189                                              | 419                                          |
|               | 55-59     | 0.00512                      | 8586                                                   | 4907                                              | 1227                                         |
|               | 0-4       | 0.00407                      | 34662                                                  | 4789                                              | 228                                          |
|               | 5-9       | 0.00030                      | 29845                                                  | 3142                                              | 524                                          |
|               | 10-14     | 0.00028                      | 31537                                                  | 1051                                              | 526                                          |
|               | 15-19     | 0.00084                      | 21126                                                  | 2756                                              | 612                                          |
|               | 20-24     | 0.00215                      | 19757                                                  | 4116                                              | 1235                                         |
| 25-29         | 0.00230   | 13606                        | 4039                                                   | 1913                                              |                                              |
| 30-34         | 0.00230   | 12094                        | 4837                                                   | 1979                                              |                                              |
| 35-39         | 0.00237   | 8574                         | 6482                                                   | 2509                                              |                                              |
| 40-44         | 0.00281   | 6062                         | 3730                                                   | 933                                               |                                              |

| Departments   | Age group | Mortality rates (R) (%/year) | Not- overweight population in 2005 (Number of people)1 | Overweight population in 2005 (Number of people)2 | Obese population in 2005 (Number of people)3 |
|---------------|-----------|------------------------------|--------------------------------------------------------|---------------------------------------------------|----------------------------------------------|
|               | 45-49     | 0.00328                      | 3634                                                   | 5250                                              | 1010                                         |
|               | 50-54     | 0.00504                      | 4193                                                   | 2648                                              | 662                                          |
|               | 55-59     | 0.00651                      | 2667                                                   | 952                                               | 952                                          |
| Department 23 | 0-4       | 0.01525                      | 41311                                                  | 7344                                              | 918                                          |
|               | 5-9       | 0.00109                      | 44511                                                  | 5193                                              | 2226                                         |
|               | 10-14     | 0.00110                      | 44070                                                  | 1494                                              | 747                                          |
|               | 15-19     | 0.00399                      | 33498                                                  | 4500                                              | 0                                            |
|               | 20-24     | 0.00906                      | 28005                                                  | 4613                                              | 988                                          |
|               | 25-29     | 0.01093                      | 20905                                                  | 7526                                              | 836                                          |
|               | 30-34     | 0.01080                      | 15027                                                  | 8820                                              | 2613                                         |
|               | 35-39     | 0.01026                      | 16202                                                  | 6782                                              | 4522                                         |
|               | 40-44     | 0.01329                      | 9737                                                   | 6043                                              | 5372                                         |
|               | 45-49     | 0.01586                      | 10030                                                  | 6687                                              | 1857                                         |
|               | 50-54     | 0.02344                      | 7333                                                   | 5923                                              | 3102                                         |
|               | 55-59     | 0.03450                      | 5874                                                   | 2797                                              | 839                                          |
| Department 44 | 0-4       | 0.00440                      | 19277                                                  | 5910                                              | 1266                                         |
|               | 5-9       | 0.00027                      | 24299                                                  | 1772                                              | 0                                            |
|               | 10-14     | 0.00035                      | 15478                                                  | 3274                                              | 0                                            |
|               | 15-19     | 0.00085                      | 16090                                                  | 1665                                              | 370                                          |
|               | 20-24     | 0.00242                      | 10515                                                  | 2954                                              | 709                                          |
|               | 25-29     | 0.00217                      | 9219                                                   | 3470                                              | 1090                                         |
|               | 30-34     | 0.00243                      | 5415                                                   | 2765                                              | 1843                                         |
|               | 35-39     | 0.00260                      | 3668                                                   | 3904                                              | 1420                                         |
|               | 40-44     | 0.00225                      | 3593                                                   | 2977                                              | 616                                          |
|               | 45-49     | 0.00271                      | 2456                                                   | 1403                                              | 1520                                         |
|               | 50-54     | 0.00425                      | 1842                                                   | 1517                                              | 867                                          |
|               | 55-59     | 0.00544                      | 1865                                                   | 829                                               | 725                                          |
| Department 47 | 0-4       | 0.00367                      | 39648                                                  | 8703                                              | 2256                                         |
|               | 5-9       | 0.00045                      | 45039                                                  | 3974                                              | 0                                            |
|               | 10-14     | 0.00036                      | 39057                                                  | 3551                                              | 507                                          |
|               | 15-19     | 0.00077                      | 37947                                                  | 2156                                              | 431                                          |
|               | 20-24     | 0.00126                      | 27725                                                  | 3279                                              | 0                                            |
|               | 25-29     | 0.00154                      | 15558                                                  | 8067                                              | 1152                                         |
|               | 30-34     | 0.00157                      | 13479                                                  | 8665                                              | 3209                                         |
|               | 35-39     | 0.00173                      | 9811                                                   | 7433                                              | 3865                                         |
|               | 40-44     | 0.00215                      | 7691                                                   | 5621                                              | 2071                                         |
|               | 45-49     | 0.00280                      | 7275                                                   | 6643                                              | 2214                                         |
|               | 50-54     | 0.00451                      | 7074                                                   | 5305                                              | 2779                                         |
|               | 55-59     | 0.00626                      | 4833                                                   | 2636                                              | 1977                                         |
| Department 70 | 0-4       | 0.00295                      | 23645                                                  | 5692                                              | 584                                          |
|               | 5-9       | 0.00022                      | 25110                                                  | 1674                                              | 418                                          |
|               | 10-14     | 0.00029                      | 28061                                                  | 1153                                              | 0                                            |
|               | 15-19     | 0.00047                      | 24510                                                  | 2254                                              | 563                                          |
|               | 20-24     | 0.00110                      | 14527                                                  | 2842                                              | 1105                                         |
|               | 25-29     | 0.00139                      | 12105                                                  | 3980                                              | 332                                          |



| Departments   | Age group | Mortality rates (R) (%/year) | Not- overweight population in 2005 (Number of people) <sup>1</sup> | Overweight population in 2005 (Number of people) <sup>2</sup> | Obese population in 2005 (Number of people) <sup>3</sup> |
|---------------|-----------|------------------------------|--------------------------------------------------------------------|---------------------------------------------------------------|----------------------------------------------------------|
|               | 30-34     | 0.00124                      | 8870                                                               | 6576                                                          | 1376                                                     |
|               | 35-39     | 0.00178                      | 6938                                                               | 5415                                                          | 1523                                                     |
|               | 40-44     | 0.00164                      | 6405                                                               | 5160                                                          | 1245                                                     |
|               | 45-49     | 0.00281                      | 4214                                                               | 4940                                                          | 2325                                                     |
|               | 50-54     | 0.00387                      | 3001                                                               | 2716                                                          | 1572                                                     |
|               | 55-59     | 0.00514                      | 3492                                                               | 1974                                                          | 1518                                                     |
| Department 88 | 0-4       | 0.00204                      | 1101                                                               | 431                                                           | 48                                                       |
|               | 5-9       | 0.00021                      | 1849                                                               | 123                                                           | 123                                                      |
|               | 10-14     | 0.00040                      | 1567                                                               | 362                                                           | 121                                                      |
|               | 15-19     | 0.00084                      | 1271                                                               | 462                                                           | 0                                                        |
|               | 20-24     | 0.00207                      | 1120                                                               | 373                                                           | 124                                                      |
|               | 25-29     | 0.00075                      | 869                                                                | 174                                                           | 58                                                       |
|               | 30-34     | 0.00086                      | 481                                                                | 180                                                           | 120                                                      |
|               | 35-39     | 0.00190                      | 663                                                                | 241                                                           | 181                                                      |
|               | 40-44     | 0.00244                      | 341                                                                | 409                                                           | 409                                                      |
|               | 45-49     | 0.00359                      | 460                                                                | 287                                                           | 287                                                      |
|               | 50-54     | 0.00436                      | 217                                                                | 43                                                            | 174                                                      |
|               | 55-59     | 0.00848                      | 97                                                                 | 146                                                           | 49                                                       |

<sup>†</sup>Values used in this table are for the urban population

<sup>1</sup> Initial value used in the stock of not-overweight population in 2005 for lower SES.

<sup>2</sup> Initial value used in the stock of overweight population in 2005 for lower SES.

<sup>3</sup> Initial value used in the stock of obese population in 2005 for lower SES.

**Table 27. Mortality rates and population size by age group at the department level for the middle socioeconomic status population (Caribe region) <sup>†</sup>**

| Departments   | Age group | Mortality rates (R) (%/year) | Not- overweight population in 2005 (Number of people) <sup>1</sup> | Overweight population in 2005 (Number of people) <sup>2</sup> | Obese population in 2005 (Number of people) <sup>3</sup> |
|---------------|-----------|------------------------------|--------------------------------------------------------------------|---------------------------------------------------------------|----------------------------------------------------------|
| Department 8  | 0-4       | 0.01938                      | 45084                                                              | 9757                                                          | 2355                                                     |
|               | 5-9       | 0.00050                      | 50749                                                              | 4880                                                          | 976                                                      |
|               | 10-14     | 0.00045                      | 55196                                                              | 5095                                                          | 1698                                                     |
|               | 15-19     | 0.00144                      | 43349                                                              | 6036                                                          | 549                                                      |
|               | 20-24     | 0.00314                      | 44945                                                              | 6889                                                          | 3609                                                     |
|               | 25-29     | 0.00362                      | 33887                                                              | 13178                                                         | 6024                                                     |
|               | 30-34     | 0.00373                      | 21128                                                              | 14337                                                         | 3773                                                     |
|               | 35-39     | 0.00360                      | 23574                                                              | 12966                                                         | 5501                                                     |
|               | 40-44     | 0.00450                      | 13906                                                              | 18040                                                         | 7517                                                     |
|               | 45-49     | 0.00525                      | 13255                                                              | 16121                                                         | 6090                                                     |
|               | 50-54     | 0.00763                      | 8565                                                               | 8565                                                          | 5930                                                     |
|               | 55-59     | 0.01129                      | 9285                                                               | 5502                                                          | 2407                                                     |
| Department 13 | 0-4       | 0.00398                      | 32302                                                              | 7537                                                          | 538                                                      |
|               | 5-9       | 0.00020                      | 30757                                                              | 2278                                                          | 1139                                                     |
|               | 10-14     | 0.00024                      | 25598                                                              | 2743                                                          | 914                                                      |
|               | 15-19     | 0.00085                      | 29385                                                              | 0                                                             | 0                                                        |
|               | 20-24     | 0.00129                      | 22453                                                              | 3274                                                          | 936                                                      |

| Departments   | Age group     | Mortality rates (R) (%/year) | Not- overweight population in 2005 (Number of people)1 | Overweight population in 2005 (Number of people)2 | Obese population in 2005 (Number of people)3 |
|---------------|---------------|------------------------------|--------------------------------------------------------|---------------------------------------------------|----------------------------------------------|
|               | 25-29         | 0.00141                      | 18661                                                  | 6586                                              | 549                                          |
|               | 30-34         | 0.00144                      | 9964                                                   | 10439                                             | 2847                                         |
|               | 35-39         | 0.00145                      | 12654                                                  | 7592                                              | 5568                                         |
|               | 40-44         | 0.00193                      | 10191                                                  | 4586                                              | 3567                                         |
|               | 45-49         | 0.00286                      | 5370                                                   | 4957                                              | 826                                          |
|               | 50-54         | 0.00338                      | 4608                                                   | 3351                                              | 3351                                         |
|               | 55-59         | 0.00512                      | 2044                                                   | 4089                                              | 2044                                         |
| Department 20 | 0-4           | 0.00407                      | 15735                                                  | 4561                                              | 228                                          |
|               | 5-9           | 0.00030                      | 23562                                                  | 3665                                              | 1571                                         |
|               | 10-14         | 0.00028                      | 25230                                                  | 2102                                              | 526                                          |
|               | 15-19         | 0.00084                      | 19595                                                  | 3368                                              | 306                                          |
|               | 20-24         | 0.00215                      | 11937                                                  | 2881                                              | 617                                          |
|               | 25-29         | 0.00230                      | 10842                                                  | 4039                                              | 1488                                         |
|               | 30-34         | 0.00230                      | 5497                                                   | 5937                                              | 1539                                         |
|               | 35-39         | 0.00237                      | 6273                                                   | 5228                                              | 2509                                         |
|               | 40-44         | 0.00281                      | 5596                                                   | 4896                                              | 2332                                         |
|               | 45-49         | 0.00328                      | 3432                                                   | 4442                                              | 2625                                         |
|               | 50-54         | 0.00504                      | 3751                                                   | 3310                                              | 1545                                         |
|               | 55-59         | 0.00651                      | 2476                                                   | 3048                                              | 2095                                         |
|               | Department 23 | 0-4                          | 0.01525                                                | 14229                                             | 2754                                         |
| 5-9           |               | 0.00109                      | 14837                                                  | 1484                                              | 2226                                         |
| 10-14         |               | 0.00110                      | 19421                                                  | 2988                                              | 747                                          |
| 15-19         |               | 0.00399                      | 13499                                                  | 2000                                              | 2000                                         |
| 20-24         |               | 0.00906                      | 11202                                                  | 2636                                              | 0                                            |
| 25-29         |               | 0.01093                      | 10453                                                  | 2509                                              | 2509                                         |
| 30-34         |               | 0.01080                      | 7840                                                   | 3267                                              | 980                                          |
| 35-39         |               | 0.01026                      | 6029                                                   | 4522                                              | 1130                                         |
| 40-44         |               | 0.01329                      | 5036                                                   | 7051                                              | 2014                                         |
| 45-49         |               | 0.01586                      | 2972                                                   | 3343                                              | 743                                          |
| 50-54         |               | 0.02344                      | 1410                                                   | 1974                                              | 846                                          |
| 55-59         |               | 0.03450                      | 1399                                                   | 2797                                              | 1399                                         |
| Department 44 |               | 0-4                          | 0.00440                                                | 9427                                              | 3799                                         |
|               | 5-9           | 0.00027                      | 9618                                                   | 759                                               | 506                                          |
|               | 10-14         | 0.00035                      | 8930                                                   | 1191                                              | 0                                            |
|               | 15-19         | 0.00085                      | 12391                                                  | 555                                               | 555                                          |
|               | 20-24         | 0.00242                      | 8506                                                   | 3072                                              | 473                                          |
|               | 25-29         | 0.00217                      | 5254                                                   | 2181                                              | 1090                                         |
|               | 30-34         | 0.00243                      | 3802                                                   | 2995                                              | 806                                          |
|               | 35-39         | 0.00260                      | 3313                                                   | 3313                                              | 1538                                         |
|               | 40-44         | 0.00225                      | 2361                                                   | 2669                                              | 1232                                         |
|               | 45-49         | 0.00271                      | 1520                                                   | 2456                                              | 1988                                         |
|               | 50-54         | 0.00425                      | 1192                                                   | 2059                                              | 975                                          |
|               | 55-59         | 0.00544                      | 1140                                                   | 1347                                              | 829                                          |
|               | Department 47 | 0-4                          | 18696                                                  | 4190                                              | 2256                                         |
| 5-9           |               | 23182                        | 2649                                                   | 2649                                              | 23182                                        |

| Departments   | Age group | Mortality rates (R) (%/year) | Not- overweight population in 2005 (Number of people)1 | Overweight population in 2005 (Number of people)2 | Obese population in 2005 (Number of people)3 |
|---------------|-----------|------------------------------|--------------------------------------------------------|---------------------------------------------------|----------------------------------------------|
|               | 10-14     | 27898                        | 2536                                                   | 0                                                 | 27898                                        |
|               | 15-19     | 15524                        | 2587                                                   | 862                                               | 15524                                        |
|               | 20-24     | 13713                        | 3876                                                   | 298                                               | 13713                                        |
|               | 25-29     | 8355                         | 3457                                                   | 2593                                              | 8355                                         |
|               | 30-34     | 7382                         | 7382                                                   | 1605                                              | 7382                                         |
|               | 35-39     | 5946                         | 5649                                                   | 2973                                              | 5946                                         |
|               | 40-44     | 7396                         | 6508                                                   | 2958                                              | 7396                                         |
|               | 45-49     | 2531                         | 4745                                                   | 2214                                              | 2531                                         |
|               | 50-54     | 1768                         | 1263                                                   | 1516                                              | 1768                                         |
|               | 55-59     | 1977                         | 1977                                                   | 1977                                              | 1977                                         |
| Department 70 | 0-4       | 0.00295                      | 7006                                                   | 1314                                              | 584                                          |
|               | 5-9       | 0.00022                      | 12136                                                  | 2092                                              | 418                                          |
|               | 10-14     | 0.00029                      | 11532                                                  | 1922                                              | 0                                            |
|               | 15-19     | 0.00047                      | 9579                                                   | 845                                               | 563                                          |
|               | 20-24     | 0.00110                      | 10421                                                  | 1421                                              | 0                                            |
|               | 25-29     | 0.00139                      | 6301                                                   | 2819                                              | 497                                          |
|               | 30-34     | 0.00124                      | 3976                                                   | 2294                                              | 1988                                         |
|               | 35-39     | 0.00178                      | 4061                                                   | 3553                                              | 1015                                         |
|               | 40-44     | 0.00164                      | 2847                                                   | 3203                                              | 1068                                         |
|               | 45-49     | 0.00281                      | 2761                                                   | 2034                                              | 2325                                         |
|               | 50-54     | 0.00387                      | 3001                                                   | 2430                                              | 1143                                         |
|               | 55-59     | 0.00514                      | 1518                                                   | 455                                               | 759                                          |
| Department 88 | 0-4       | 0.00204                      | 718                                                    | 527                                               | 239                                          |
|               | 5-9       | 0.00021                      | 740                                                    | 247                                               | 247                                          |
|               | 10-14     | 0.00040                      | 723                                                    | 603                                               | 241                                          |
|               | 15-19     | 0.00084                      | 809                                                    | 116                                               | 462                                          |
|               | 20-24     | 0.00207                      | 1058                                                   | 249                                               | 124                                          |
|               | 25-29     | 0.00075                      | 464                                                    | 811                                               | 232                                          |
|               | 30-34     | 0.00086                      | 481                                                    | 541                                               | 300                                          |
|               | 35-39     | 0.00190                      | 603                                                    | 542                                               | 542                                          |
|               | 40-44     | 0.00244                      | 682                                                    | 682                                               | 341                                          |
|               | 45-49     | 0.00359                      | 172                                                    | 574                                               | 345                                          |
|               | 50-54     | 0.00436                      | 435                                                    | 348                                               | 478                                          |
|               | 55-59     | 0.00848                      | 0                                                      | 388                                               | 146                                          |

†Values used in this table are for the urban population

1 Initial value used in the stock of not-overweight population in 2005 for middle SES.

2 Initial value used in the stock of overweight population in 2005 for middle SES.

3 Initial value used in the stock of obese population in 2005 for middle SES.

**Table 28. Mortality rates and population size by age group at the department level for the higher socioeconomic status population (Caribe region) †**

| Departments   | Age group | Mortality rates (R) (%/year) | Not- overweight population in 2005 (Number of people)1 | Overweight population in 2005 (Number of people)2 | Obese population in 2005 (Number of people)3 |
|---------------|-----------|------------------------------|--------------------------------------------------------|---------------------------------------------------|----------------------------------------------|
| Department 8  | 0-4       | 0.01938                      | 45084                                                  | 12785                                             | 4037                                         |
|               | 5-9       | 0.00050                      | 59533                                                  | 10735                                             | 9759                                         |
|               | 10-14     | 0.00045                      | 52649                                                  | 18682                                             | 5944                                         |
|               | 15-19     | 0.00144                      | 64749                                                  | 11523                                             | 3292                                         |
|               | 20-24     | 0.00314                      | 55771                                                  | 15747                                             | 4921                                         |
|               | 25-29     | 0.00362                      | 41793                                                  | 19202                                             | 7530                                         |
|               | 30-34     | 0.00373                      | 27919                                                  | 24146                                             | 14714                                        |
|               | 35-39     | 0.00360                      | 24360                                                  | 25932                                             | 10608                                        |
|               | 40-44     | 0.00450                      | 20295                                                  | 22550                                             | 14282                                        |
|               | 45-49     | 0.00525                      | 18987                                                  | 21853                                             | 11464                                        |
|               | 50-54     | 0.00763                      | 10212                                                  | 16801                                             | 12518                                        |
| 55-59         | 0.01129   | 8254                         | 18571                                                  | 7910                                              |                                              |
| Department 13 | 0-4       | 0.00398                      | 36608                                                  | 6999                                              | 3769                                         |
|               | 5-9       | 0.00020                      | 38732                                                  | 5696                                              | 2278                                         |
|               | 10-14     | 0.00024                      | 44796                                                  | 8228                                              | 3657                                         |
|               | 15-19     | 0.00085                      | 55831                                                  | 8081                                              | 735                                          |
|               | 20-24     | 0.00129                      | 49117                                                  | 4678                                              | 1871                                         |
|               | 25-29     | 0.00141                      | 31833                                                  | 13172                                             | 2195                                         |
|               | 30-34     | 0.00144                      | 22776                                                  | 13286                                             | 5694                                         |
|               | 35-39     | 0.00145                      | 19740                                                  | 14172                                             | 5568                                         |
|               | 40-44     | 0.00193                      | 13757                                                  | 16305                                             | 5095                                         |
|               | 45-49     | 0.00286                      | 13218                                                  | 16936                                             | 9914                                         |
|               | 50-54     | 0.00338                      | 10891                                                  | 9216                                              | 8797                                         |
| 55-59         | 0.00512   | 6133                         | 8586                                                   | 6951                                              |                                              |
| Department 20 | 0-4       | 0.00407                      | 11402                                                  | 2736                                              | 684                                          |
|               | 5-9       | 0.00030                      | 10472                                                  | 2094                                              | 1047                                         |
|               | 10-14     | 0.00028                      | 12615                                                  | 526                                               | 1051                                         |
|               | 15-19     | 0.00084                      | 17452                                                  | 2449                                              | 306                                          |
|               | 20-24     | 0.00215                      | 11113                                                  | 3087                                              | 617                                          |
|               | 25-29     | 0.00230                      | 9566                                                   | 2976                                              | 1488                                         |
|               | 30-34     | 0.00230                      | 5497                                                   | 5937                                              | 1099                                         |
|               | 35-39     | 0.00237                      | 3137                                                   | 5019                                              | 2928                                         |
|               | 40-44     | 0.00281                      | 4896                                                   | 6062                                              | 2798                                         |
|               | 45-49     | 0.00328                      | 2625                                                   | 3836                                              | 3029                                         |
|               | 50-54     | 0.00504                      | 1986                                                   | 2207                                              | 3089                                         |
| 55-59         | 0.00651   | 952                          | 3238                                                   | 1905                                              |                                              |
| Department 23 | 0-4       | 0.01525                      | 9639                                                   | 2295                                              | 918                                          |
|               | 5-9       | 0.00109                      | 8160                                                   | 742                                               | 742                                          |
|               | 10-14     | 0.00110                      | 11951                                                  | 2241                                              | 0                                            |
|               | 15-19     | 0.00399                      | 16499                                                  | 4000                                              | 500                                          |
|               | 20-24     | 0.00906                      | 14167                                                  | 3295                                              | 1318                                         |
|               | 25-29     | 0.01093                      | 8780                                                   | 2927                                              | 836                                          |
|               | 30-34     | 0.01080                      | 5880                                                   | 4573                                              | 980                                          |
|               | 35-39     | 0.01026                      | 4145                                                   | 4522                                              | 3391                                         |
| 40-44         | 0.01329   | 5708                         | 5372                                                   | 336                                               |                                              |

| Departments   | Age group | Mortality rates (R) (%/year) | Not- overweight population in 2005 (Number of people)1 | Overweight population in 2005 (Number of people)2 | Obese population in 2005 (Number of people)3 |
|---------------|-----------|------------------------------|--------------------------------------------------------|---------------------------------------------------|----------------------------------------------|
|               | 45-49     | 0.01586                      | 4829                                                   | 5944                                              | 1486                                         |
|               | 50-54     | 0.02344                      | 846                                                    | 5923                                              | 2256                                         |
|               | 55-59     | 0.03450                      | 2238                                                   | 2517                                              | 2517                                         |
| Department 44 | 0-4       | 0.00440                      | 5769                                                   | 2533                                              | 844                                          |
|               | 5-9       | 0.00027                      | 4303                                                   | 1772                                              | 759                                          |
|               | 10-14     | 0.00035                      | 8037                                                   | 2084                                              | 595                                          |
|               | 15-19     | 0.00085                      | 8508                                                   | 925                                               | 0                                            |
|               | 20-24     | 0.00242                      | 4371                                                   | 2717                                              | 945                                          |
|               | 25-29     | 0.00217                      | 4164                                                   | 2379                                              | 595                                          |
|               | 30-34     | 0.00243                      | 1959                                                   | 3341                                              | 922                                          |
|               | 35-39     | 0.00260                      | 3076                                                   | 1893                                              | 947                                          |
|               | 40-44     | 0.00225                      | 1848                                                   | 3080                                              | 2053                                         |
|               | 45-49     | 0.00271                      | 1286                                                   | 3157                                              | 1169                                         |
|               | 50-54     | 0.00425                      | 758                                                    | 1625                                              | 1409                                         |
|               | 55-59     | 0.00544                      | 518                                                    | 1347                                              | 1140                                         |
| Department 47 | 0-4       | 0.00367                      | 13216                                                  | 3223                                              | 967                                          |
|               | 5-9       | 0.00045                      | 10597                                                  | 4636                                              | 1987                                         |
|               | 10-14     | 0.00036                      | 11666                                                  | 1522                                              | 0                                            |
|               | 15-19     | 0.00077                      | 15955                                                  | 2156                                              | 431                                          |
|               | 20-24     | 0.00126                      | 13415                                                  | 4174                                              | 1789                                         |
|               | 25-29     | 0.00154                      | 12677                                                  | 6627                                              | 3169                                         |
|               | 30-34     | 0.00157                      | 5456                                                   | 4814                                              | 2888                                         |
|               | 35-39     | 0.00173                      | 8325                                                   | 6838                                              | 1784                                         |
|               | 40-44     | 0.00215                      | 6212                                                   | 5029                                              | 3550                                         |
|               | 45-49     | 0.00280                      | 1898                                                   | 6643                                              | 4745                                         |
|               | 50-54     | 0.00451                      | 4042                                                   | 4295                                              | 3032                                         |
|               | 55-59     | 0.00626                      | 3076                                                   | 2856                                              | 2636                                         |
| Department 70 | 0-4       | 0.00295                      | 10217                                                  | 1168                                              | 1022                                         |
|               | 5-9       | 0.00022                      | 7951                                                   | 4185                                              | 418                                          |
|               | 10-14     | 0.00029                      | 10763                                                  | 1922                                              | 769                                          |
|               | 15-19     | 0.00047                      | 10706                                                  | 1409                                              | 282                                          |
|               | 20-24     | 0.00110                      | 8685                                                   | 3316                                              | 316                                          |
|               | 25-29     | 0.00139                      | 6467                                                   | 3814                                              | 1161                                         |
|               | 30-34     | 0.00124                      | 3976                                                   | 3365                                              | 765                                          |
|               | 35-39     | 0.00178                      | 4400                                                   | 4738                                              | 2538                                         |
|               | 40-44     | 0.00164                      | 3736                                                   | 4448                                              | 2313                                         |
|               | 45-49     | 0.00281                      | 1308                                                   | 2470                                              | 2906                                         |
|               | 50-54     | 0.00387                      | 858                                                    | 3716                                              | 1715                                         |
|               | 55-59     | 0.00514                      | 2126                                                   | 3340                                              | 1366                                         |
| Department 88 | 0-4       | 0.00204                      | 1053                                                   | 192                                               | 96                                           |
|               | 5-9       | 0.00021                      | 493                                                    | 740                                               | 123                                          |
|               | 10-14     | 0.00040                      | 1085                                                   | 241                                               | 0                                            |
|               | 15-19     | 0.00084                      | 1040                                                   | 462                                               | 116                                          |
|               | 20-24     | 0.00207                      | 809                                                    | 311                                               | 187                                          |
|               | 25-29     | 0.00075                      | 637                                                    | 290                                               | 464                                          |

| Departments | Age group | Mortality rates (R) (%/year) | Not- overweight population in 2005 (Number of people) <sup>1</sup> | Overweight population in 2005 (Number of people) <sup>2</sup> | Obese population in 2005 (Number of people) <sup>3</sup> |
|-------------|-----------|------------------------------|--------------------------------------------------------------------|---------------------------------------------------------------|----------------------------------------------------------|
|             | 30-34     | 0.00086                      | 180                                                                | 721                                                           | 481                                                      |
|             | 35-39     | 0.00190                      | 482                                                                | 663                                                           | 301                                                      |
|             | 40-44     | 0.00244                      | 477                                                                | 614                                                           | 546                                                      |
|             | 45-49     | 0.00359                      | 517                                                                | 804                                                           | 172                                                      |
|             | 50-54     | 0.00436                      | 174                                                                | 391                                                           | 261                                                      |
|             | 55-59     | 0.00848                      | 291                                                                | 340                                                           | 194                                                      |

<sup>†</sup>Values used in this table are for the urban population

<sup>1</sup> Initial value used in the stock of not-overweight population in 2005 for higher SES.

<sup>2</sup> Initial value used in the stock of overweight population in 2005 for higher SES.

<sup>3</sup> Initial value used in the stock of obese population in 2005 for higher SES.

## 1.2 Oriental region

The Oriental region of Colombia is located in the central eastern part of the national territory and consists of five departments, these are:

- Boyacá (15)
- Cundinamarca (25)
- Meta (50)
- Norte De Santander (54)
- Santander (68)

### 1.2.1 Data and model parameters used

**Table 29. Prevalent rates of entire population by age group, gender, and body mass index category in 2005 (Oriental region)**

| Age Group | Nutritional State Males |           |         | Nutritional State Females |           |         |
|-----------|-------------------------|-----------|---------|---------------------------|-----------|---------|
|           | Not-Overweigh           | Overweigh | Obese   | Not-Overweigh             | Overweigh | Obese   |
| 0-4       | 0.72968                 | 0.19471   | 0.07561 | 0.76311                   | 0.19417   | 0.04272 |
| 5-9       | 0.77491                 | 0.15867   | 0.06642 | 0.83459                   | 0.11654   | 0.04887 |
| 10-14     | 0.80695                 | 0.11969   | 0.07336 | 0.81469                   | 0.16084   | 0.02448 |
| 15-19     | 0.91923                 | 0.06538   | 0.01538 | 0.83235                   | 0.13529   | 0.03235 |
| 20-24     | 0.73981                 | 0.21317   | 0.04702 | 0.72453                   | 0.22830   | 0.04717 |
| 25-29     | 0.58462                 | 0.31923   | 0.09615 | 0.62268                   | 0.29691   | 0.08041 |
| 30-34     | 0.51639                 | 0.36885   | 0.11475 | 0.48182                   | 0.37273   | 0.14545 |
| 35-39     | 0.42424                 | 0.43290   | 0.14286 | 0.47368                   | 0.36000   | 0.16632 |
| 40-44     | 0.42553                 | 0.42553   | 0.14894 | 0.36893                   | 0.37864   | 0.25243 |
| 45-49     | 0.35593                 | 0.45198   | 0.19209 | 0.26221                   | 0.47301   | 0.26478 |
| 50-54     | 0.37805                 | 0.42683   | 0.19512 | 0.27303                   | 0.43421   | 0.29276 |
| 55-59     | 0.39716                 | 0.41135   | 0.19149 | 0.24783                   | 0.44348   | 0.30870 |

**Table 30. Prevalent rates of lower socioeconomic status population by age group, gender, and body mass index category in 2005 (Oriental region)**

| Age Group | Nutritional State Males |           |         | Nutritional State Females |           |         |
|-----------|-------------------------|-----------|---------|---------------------------|-----------|---------|
|           | Not-Overweigh           | Overweigh | Obese   | Not-Overweigh             | Overweigh | Obese   |
| 0-4       | 0.77698                 | 0.17266   | 0.05036 | 0.77344                   | 0.17188   | 0.05469 |
| 5-9       | 0.82456                 | 0.15789   | 0.01754 | 0.91071                   | 0.03571   | 0.05357 |
| 10-14     | 0.90476                 | 0.09524   | 0.00000 | 0.83333                   | 0.14583   | 0.02083 |
| 15-19     | 0.96296                 | 0.01852   | 0.01852 | 0.86885                   | 0.11475   | 0.01639 |
| 20-24     | 0.80392                 | 0.17647   | 0.01961 | 0.68182                   | 0.28409   | 0.03409 |
| 25-29     | 0.78049                 | 0.14634   | 0.07317 | 0.63542                   | 0.27083   | 0.09375 |
| 30-34     | 0.57447                 | 0.40426   | 0.02128 | 0.51429                   | 0.42857   | 0.05714 |
| 35-39     | 0.58974                 | 0.38462   | 0.02564 | 0.50000                   | 0.35294   | 0.14706 |
| 40-44     | 0.67442                 | 0.23256   | 0.09302 | 0.40278                   | 0.37500   | 0.22222 |
| 45-49     | 0.60000                 | 0.30000   | 0.10000 | 0.28889                   | 0.46667   | 0.24444 |
| 50-54     | 0.55556                 | 0.27778   | 0.16667 | 0.40909                   | 0.34091   | 0.25000 |
| 55-59     | 0.62963                 | 0.25926   | 0.11111 | 0.31707                   | 0.41463   | 0.26829 |

**Table 31. Prevalent rates of middle socioeconomic status population by age group, gender, and body mass index category in 2005 (Oriental region)**

| Age Group | Nutritional State Males |           |         | Nutritional State Females |           |         |
|-----------|-------------------------|-----------|---------|---------------------------|-----------|---------|
|           | Not-Overweigh           | Overweigh | Obese   | Not-Overweigh             | Overweigh | Obese   |
| 0-4       | 0.72826                 | 0.18478   | 0.08696 | 0.81215                   | 0.17127   | 0.01657 |
| 5-9       | 0.84337                 | 0.09639   | 0.06024 | 0.85897                   | 0.11538   | 0.02564 |
| 10-14     | 0.76667                 | 0.15556   | 0.07778 | 0.90588                   | 0.09412   | 0.00000 |
| 15-19     | 0.90123                 | 0.08642   | 0.01235 | 0.83333                   | 0.11765   | 0.04902 |
| 20-24     | 0.76596                 | 0.22340   | 0.01064 | 0.68047                   | 0.23669   | 0.08284 |
| 25-29     | 0.57143                 | 0.30952   | 0.11905 | 0.62000                   | 0.32667   | 0.05333 |
| 30-34     | 0.53425                 | 0.31507   | 0.15068 | 0.41606                   | 0.40146   | 0.18248 |
| 35-39     | 0.47761                 | 0.38806   | 0.13433 | 0.41830                   | 0.41176   | 0.16993 |
| 40-44     | 0.39189                 | 0.43243   | 0.17568 | 0.39394                   | 0.37374   | 0.23232 |
| 45-49     | 0.38182                 | 0.54545   | 0.07273 | 0.28814                   | 0.39831   | 0.31356 |
| 50-54     | 0.48000                 | 0.38000   | 0.14000 | 0.32051                   | 0.35897   | 0.32051 |
| 55-59     | 0.38462                 | 0.43590   | 0.17949 | 0.33333                   | 0.46032   | 0.20635 |

**Table 32. Prevalent rates of higher socioeconomic status population by age group, gender, and body mass index category in 2005 (Oriental region)**

| Age Group | Nutritional State Males |           |         | Nutritional State Females |           |         |
|-----------|-------------------------|-----------|---------|---------------------------|-----------|---------|
|           | Not-Overweigh           | Overweigh | Obese   | Not-Overweigh             | Overweigh | Obese   |
| 0-4       | 0.69903                 | 0.21845   | 0.08252 | 0.71359                   | 0.22816   | 0.05825 |
| 5-9       | 0.70992                 | 0.19847   | 0.09160 | 0.78788                   | 0.15152   | 0.06061 |
| 10-14     | 0.80315                 | 0.10236   | 0.09449 | 0.75817                   | 0.20261   | 0.03922 |
| 15-19     | 0.91200                 | 0.07200   | 0.01600 | 0.81921                   | 0.15254   | 0.02825 |
| 20-24     | 0.70690                 | 0.21839   | 0.07471 | 0.76557                   | 0.20513   | 0.02930 |
| 25-29     | 0.53333                 | 0.37778   | 0.08889 | 0.61925                   | 0.28870   | 0.09205 |
| 30-34     | 0.48387                 | 0.38710   | 0.12903 | 0.51073                   | 0.33906   | 0.15021 |
| 35-39     | 0.34400                 | 0.47200   | 0.18400 | 0.50000                   | 0.33071   | 0.16929 |
| 40-44     | 0.35593                 | 0.49153   | 0.15254 | 0.34855                   | 0.38174   | 0.26971 |
| 45-49     | 0.29412                 | 0.43137   | 0.27451 | 0.24336                   | 0.51327   | 0.24336 |
| 50-54     | 0.29167                 | 0.47917   | 0.22917 | 0.21978                   | 0.48901   | 0.29121 |

|       |         |         |         |         |         |         |
|-------|---------|---------|---------|---------|---------|---------|
| 55-59 | 0.32000 | 0.45333 | 0.22667 | 0.18254 | 0.44444 | 0.37302 |
|-------|---------|---------|---------|---------|---------|---------|

**Table 33. Prevalent rates of entire population by age group, gender, and body mass index category in 2010 (Oriental region)**

| Age Group | Nutritional State Males |           |         | Nutritional State Females |           |         |
|-----------|-------------------------|-----------|---------|---------------------------|-----------|---------|
|           | Not-Overweigh           | Overweigh | Obese   | Not-Overweigh             | Overweigh | Obese   |
| 0-4       | 0.75081                 | 0.19094   | 0.05825 | 0.79614                   | 0.16164   | 0.04222 |
| 5-9       | 0.75282                 | 0.16027   | 0.08691 | 0.81051                   | 0.14020   | 0.04929 |
| 10-14     | 0.75161                 | 0.16022   | 0.08817 | 0.78909                   | 0.16579   | 0.04512 |
| 15-19     | 0.83222                 | 0.12650   | 0.04128 | 0.78791                   | 0.16484   | 0.04725 |
| 20-24     | 0.71358                 | 0.21358   | 0.07285 | 0.68146                   | 0.23238   | 0.08616 |
| 25-29     | 0.51866                 | 0.34774   | 0.13360 | 0.60227                   | 0.26278   | 0.13494 |
| 30-34     | 0.45244                 | 0.35267   | 0.19490 | 0.47287                   | 0.35349   | 0.17364 |
| 35-39     | 0.41534                 | 0.40476   | 0.17989 | 0.39840                   | 0.40320   | 0.19840 |
| 40-44     | 0.37907                 | 0.43488   | 0.18605 | 0.35229                   | 0.40284   | 0.24487 |
| 45-49     | 0.34933                 | 0.47200   | 0.17867 | 0.30017                   | 0.41791   | 0.28192 |
| 50-54     | 0.34074                 | 0.45556   | 0.20370 | 0.21649                   | 0.43299   | 0.35052 |
| 55-59     | 0.36444                 | 0.42222   | 0.21333 | 0.23656                   | 0.43548   | 0.32796 |

**Table 34. Prevalent rates of lower socioeconomic status population by age group, gender, and body mass index category in 2010 (Oriental region)**

| Age Group | Nutritional State Males |           |         | Nutritional State Females |           |         |
|-----------|-------------------------|-----------|---------|---------------------------|-----------|---------|
|           | Not-Overweigh           | Overweigh | Obese   | Not-Overweigh             | Overweigh | Obese   |
| 0-4       | 0.78523                 | 0.16779   | 0.04698 | 0.81818                   | 0.14015   | 0.04167 |
| 5-9       | 0.81028                 | 0.13834   | 0.05138 | 0.87405                   | 0.09542   | 0.03053 |
| 10-14     | 0.85366                 | 0.12602   | 0.02033 | 0.86000                   | 0.10800   | 0.03200 |
| 15-19     | 0.91358                 | 0.08025   | 0.00617 | 0.81780                   | 0.13983   | 0.04237 |
| 20-24     | 0.81944                 | 0.11111   | 0.06944 | 0.66489                   | 0.25532   | 0.07979 |
| 25-29     | 0.56552                 | 0.35862   | 0.07586 | 0.59551                   | 0.25281   | 0.15169 |
| 30-34     | 0.57143                 | 0.29524   | 0.13333 | 0.45070                   | 0.35915   | 0.19014 |
| 35-39     | 0.56180                 | 0.33708   | 0.10112 | 0.44262                   | 0.37705   | 0.18033 |
| 40-44     | 0.47222                 | 0.38889   | 0.13889 | 0.40909                   | 0.35606   | 0.23485 |
| 45-49     | 0.53012                 | 0.42169   | 0.04819 | 0.39000                   | 0.35000   | 0.26000 |
| 50-54     | 0.59259                 | 0.37037   | 0.03704 | 0.25882                   | 0.42353   | 0.31765 |
| 55-59     | 0.56098                 | 0.39024   | 0.04878 | 0.30000                   | 0.41667   | 0.28333 |

**Table 35. Prevalent rates of middle socioeconomic status population by age group, gender, and body mass index category in 2010 (Oriental region)**

| Age Group | Nutritional State Males |           |         | Nutritional State Females |           |         |
|-----------|-------------------------|-----------|---------|---------------------------|-----------|---------|
|           | Not-Overweigh           | Overweigh | Obese   | Not-Overweigh             | Overweigh | Obese   |
| 0-4       | 0.74843                 | 0.19497   | 0.05660 | 0.77528                   | 0.19101   | 0.03371 |
| 5-9       | 0.80132                 | 0.12914   | 0.06954 | 0.78041                   | 0.16892   | 0.05068 |
| 10-14     | 0.76923                 | 0.15050   | 0.08027 | 0.77852                   | 0.18456   | 0.03691 |
| 15-19     | 0.82258                 | 0.12903   | 0.04839 | 0.80077                   | 0.14943   | 0.04981 |
| 20-24     | 0.75342                 | 0.19178   | 0.05479 | 0.66288                   | 0.26136   | 0.07576 |
| 25-29     | 0.54545                 | 0.33117   | 0.12338 | 0.61927                   | 0.26606   | 0.11468 |
| 30-34     | 0.46203                 | 0.35443   | 0.18354 | 0.53589                   | 0.31579   | 0.14833 |



|       |         |         |         |         |         |         |
|-------|---------|---------|---------|---------|---------|---------|
| 35-39 | 0.39716 | 0.43972 | 0.16312 | 0.39524 | 0.35238 | 0.25238 |
| 40-44 | 0.46400 | 0.36000 | 0.17600 | 0.37173 | 0.40314 | 0.22513 |
| 45-49 | 0.32759 | 0.52586 | 0.14655 | 0.30952 | 0.39524 | 0.29524 |
| 50-54 | 0.33333 | 0.44444 | 0.22222 | 0.19084 | 0.39695 | 0.41221 |
| 55-59 | 0.30357 | 0.50000 | 0.19643 | 0.26667 | 0.40000 | 0.33333 |

**Table 36. Prevalent rates of higher socioeconomic status population by age group, gender, and body mass index category in 2010 (Oriental region)**

| Age Group | Nutritional State Males |           |         | Nutritional State Females |           |         |
|-----------|-------------------------|-----------|---------|---------------------------|-----------|---------|
|           | Not-Overweigh           | Overweigh | Obese   | Not-Overweigh             | Overweigh | Obese   |
| 0-4       | 0.72026                 | 0.20900   | 0.07074 | 0.79530                   | 0.15436   | 0.05034 |
| 5-9       | 0.66465                 | 0.20544   | 0.12991 | 0.78873                   | 0.14930   | 0.06197 |
| 10-14     | 0.67273                 | 0.18961   | 0.13766 | 0.75309                   | 0.18765   | 0.05926 |
| 15-19     | 0.80059                 | 0.14663   | 0.05279 | 0.76271                   | 0.18886   | 0.04843 |
| 20-24     | 0.61411                 | 0.29461   | 0.09129 | 0.70701                   | 0.19427   | 0.09873 |
| 25-29     | 0.46667                 | 0.35238   | 0.18095 | 0.59416                   | 0.26623   | 0.13961 |
| 30-34     | 0.36905                 | 0.38690   | 0.24405 | 0.43878                   | 0.37755   | 0.18367 |
| 35-39     | 0.34459                 | 0.41216   | 0.24324 | 0.38225                   | 0.45051   | 0.16724 |
| 40-44     | 0.30472                 | 0.48927   | 0.20601 | 0.31613                   | 0.42258   | 0.26129 |
| 45-49     | 0.27841                 | 0.46023   | 0.26136 | 0.26280                   | 0.45734   | 0.27986 |
| 50-54     | 0.25000                 | 0.49306   | 0.25694 | 0.21561                   | 0.45353   | 0.33086 |
| 55-59     | 0.32813                 | 0.39844   | 0.27344 | 0.20290                   | 0.45894   | 0.33816 |

**Table 37. Fraction of births for men by body mass index category and socioeconomic status (Oriental region)<sup>†</sup>**

| Population group | Lower SES (%/year) | Middle SES (%/year) | Higher SES (%/year) | Complete Urban Population (%/year) |
|------------------|--------------------|---------------------|---------------------|------------------------------------|
| Not- overweight  | 84,62%             | 76,92%              | 72,22%              | 77,23%                             |
| Overweight       | 7,69%              | 7,69%               | 22,22%              | 12,87%                             |
| Obese            | 7,69%              | 15,38%              | 5,56%               | 9,90%                              |

<sup>†</sup> The fractions of births by each BMI category correspond to the prevalences by BMI category of children aged 0 to 12 months

**Table 38. Fraction of births for women by body mass index category and socioeconomic status (Oriental region)<sup>†</sup>**

| Population group | Lower SES (%/year) | Middle SES (%/year) | Higher SES (%/year) | Complete Urban Population (%/year) |
|------------------|--------------------|---------------------|---------------------|------------------------------------|
| Not- overweight  | 83,33%             | 84,85%              | 69,44%              | 78,49%                             |
| Overweight       | 8,33%              | 15,15%              | 27,78%              | 18,28%                             |
| Obese            | 8,33%              | 0,00%               | 2,78%               | 3,23%                              |

<sup>†</sup> The fractions of births by each BMI category correspond to the prevalences by BMI category of children aged 0 to 12 months

**Table 39. Mortality rates for men and population size by age group without segregate by socioeconomic status (Oriental region)<sup>†</sup>**

| Age group | Mortality rates (R) (%/year) | Not- overweight men in 2005 (Number of people) <sup>1</sup> | Overweight men in 2005 (Number of people) <sup>2</sup> | Obese men in 2005 (Number of people) <sup>3</sup> |
|-----------|------------------------------|-------------------------------------------------------------|--------------------------------------------------------|---------------------------------------------------|
| 0-4       | 0,00339                      | 176247                                                      | 47030                                                  | 18264                                             |
| 5-9       | 0,00029                      | 197520                                                      | 40445                                                  | 16930                                             |
| 10-14     | 0,00035                      | 210874                                                      | 31278                                                  | 19170                                             |
| 15-19     | 0,00119                      | 228039                                                      | 16220                                                  | 3817                                              |
| 20-24     | 0,00239                      | 159170                                                      | 45862                                                  | 10117                                             |
| 25-29     | 0,00273                      | 111185                                                      | 60713                                                  | 18287                                             |
| 30-34     | 0,00293                      | 86676                                                       | 61911                                                  | 19261                                             |
| 35-39     | 0,00283                      | 71920                                                       | 73388                                                  | 24218                                             |
| 40-44     | 0,00288                      | 68349                                                       | 68349                                                  | 23922                                             |
| 45-49     | 0,00380                      | 46710                                                       | 59314                                                  | 25209                                             |
| 50-54     | 0,00630                      | 39542                                                       | 44644                                                  | 20409                                             |
| 55-59     | 0,00831                      | 32484                                                       | 33644                                                  | 15662                                             |

†Values used in this table are for the urban population

<sup>1</sup> Initial value used in the stock of not-overweight population in 2005.

<sup>2</sup> Initial value used in the stock of overweight population in 2005.

<sup>3</sup> Initial value used in the stock of obese population in 2005.

**Table 40. Mortality rates for women and population size by age group without segregate by socioeconomic status (Oriental region)†**

| Age group | Mortality rates (R) (%/year) | Not- overweight men in 2005 (Number of people) <sup>1</sup> | Overweight men in 2005 (Number of people) <sup>2</sup> | Obese men in 2005 (Number of people) <sup>3</sup> |
|-----------|------------------------------|-------------------------------------------------------------|--------------------------------------------------------|---------------------------------------------------|
| 0-4       | 0,00279                      | 177602                                                      | 45191                                                  | 9942                                              |
| 5-9       | 0,00025                      | 206793                                                      | 28877                                                  | 12110                                             |
| 10-14     | 0,00022                      | 208082                                                      | 41081                                                  | 6251                                              |
| 15-19     | 0,00048                      | 209006                                                      | 33973                                                  | 8124                                              |
| 20-24     | 0,00057                      | 164005                                                      | 51679                                                  | 10677                                             |
| 25-29     | 0,00062                      | 127221                                                      | 60662                                                  | 16429                                             |
| 30-34     | 0,00074                      | 90686                                                       | 70153                                                  | 27377                                             |
| 35-39     | 0,00093                      | 92379                                                       | 70208                                                  | 32435                                             |
| 40-44     | 0,00157                      | 67232                                                       | 69001                                                  | 46001                                             |
| 45-49     | 0,00211                      | 39405                                                       | 71084                                                  | 39791                                             |
| 50-54     | 0,00362                      | 32546                                                       | 51761                                                  | 34899                                             |
| 55-59     | 0,00537                      | 23408                                                       | 41889                                                  | 29158                                             |

†Values used in this table are for the urban population

<sup>1</sup> Initial value used in the stock of not-overweight population in 2005.

<sup>2</sup> Initial value used in the stock of overweight population in 2005.

<sup>3</sup> Initial value used in the stock of obese population in 2005.

**Table 41. Man mortality rates and population size by age group for the lower socioeconomic status population (Oriental region)†**

| Age group | Mortality rates (R) (%/year) | Not- overweight men in 2005 (Number of people) <sup>1</sup> | Overweight men in 2005 (Number of people) <sup>2</sup> | Obese men in 2005 (Number of people) <sup>3</sup> |
|-----------|------------------------------|-------------------------------------------------------------|--------------------------------------------------------|---------------------------------------------------|
| 0-4       | 0,00339                      | 49313                                                       | 10958                                                  | 3196                                              |
| 5-9       | 0,00029                      | 44207                                                       | 8465                                                   | 941                                               |
| 10-14     | 0,00035                      | 38341                                                       | 4036                                                   | 0                                                 |
| 15-19     | 0,00119                      | 49615                                                       | 954                                                    | 954                                               |
| 20-24     | 0,00239                      | 27652                                                       | 6070                                                   | 674                                               |
| 25-29     | 0,00273                      | 23407                                                       | 4389                                                   | 2194                                              |
| 30-34     | 0,00293                      | 18573                                                       | 13070                                                  | 688                                               |
| 35-39     | 0,00283                      | 16879                                                       | 11008                                                  | 734                                               |

|       |         |       |      |      |
|-------|---------|-------|------|------|
| 40-44 | 0,00288 | 19821 | 6835 | 2734 |
| 45-49 | 0,00380 | 8897  | 4449 | 1483 |
| 50-54 | 0,00630 | 6378  | 3189 | 1913 |
| 55-59 | 0,00831 | 9861  | 4060 | 1740 |

†Values used in this table are for the urban population

<sup>1</sup> Initial value used in the stock of not-overweight population in 2005 for lower SES.

<sup>2</sup> Initial value used in the stock of overweight population in 2005 for lower SES.

<sup>3</sup> Initial value used in the stock of obese population in 2005 for lower SES.

**Table 42. Women mortality rates and population size by age group for the lower socioeconomic status population (Oriental region) †**

| Age group | Mortality rates (R) (%/year) | Not- overweight women in 2005 (Number of people) <sup>1</sup> | Overweight women in 2005 (Number of people) <sup>2</sup> | Obese women in 2005 (Number of people) <sup>3</sup> |
|-----------|------------------------------|---------------------------------------------------------------|----------------------------------------------------------|-----------------------------------------------------|
| 0-4       | 0,00279                      | 44740                                                         | 9942                                                     | 3163                                                |
| 5-9       | 0,00025                      | 47506                                                         | 1863                                                     | 2794                                                |
| 10-14     | 0,00022                      | 35722                                                         | 6251                                                     | 893                                                 |
| 15-19     | 0,00048                      | 39143                                                         | 5170                                                     | 739                                                 |
| 20-24     | 0,00057                      | 25626                                                         | 10677                                                    | 1281                                                |
| 25-29     | 0,00062                      | 25697                                                         | 10953                                                    | 3791                                                |
| 30-34     | 0,00074                      | 15399                                                         | 12833                                                    | 1711                                                |
| 35-39     | 0,00093                      | 13959                                                         | 9854                                                     | 4106                                                |
| 40-44     | 0,00157                      | 12827                                                         | 11943                                                    | 7077                                                |
| 45-49     | 0,00211                      | 5022                                                          | 8113                                                     | 4250                                                |
| 50-54     | 0,00362                      | 7058                                                          | 5882                                                     | 4313                                                |
| 55-59     | 0,00537                      | 5339                                                          | 6981                                                     | 4517                                                |

†Values used in this table are for the urban population

<sup>1</sup> Initial value used in the stock of not-overweight population in 2005 for lower SES.

<sup>2</sup> Initial value used in the stock of overweight population in 2005 for lower SES.

<sup>3</sup> Initial value used in the stock of obese population in 2005 for lower SES.

**Table 43. Man mortality rates and population size by age group for the middle socioeconomic status population (Oriental region) †**

| Age group | Mortality rates (R) (%/year) | Not- overweight men in 2005 (Number of people) <sup>1</sup> | Overweight men in 2005 (Number of people) <sup>2</sup> | Obese men in 2005 (Number of people) <sup>3</sup> |
|-----------|------------------------------|-------------------------------------------------------------|--------------------------------------------------------|---------------------------------------------------|
| 0-4       | 0,00339                      | 61184                                                       | 15524                                                  | 7306                                              |
| 5-9       | 0,00029                      | 65840                                                       | 7525                                                   | 4703                                              |
| 10-14     | 0,00035                      | 69619                                                       | 14126                                                  | 7063                                              |
| 15-19     | 0,00119                      | 69652                                                       | 6679                                                   | 954                                               |
| 20-24     | 0,00239                      | 48560                                                       | 14163                                                  | 674                                               |
| 25-29     | 0,00273                      | 35111                                                       | 19019                                                  | 7315                                              |
| 30-34     | 0,00293                      | 26828                                                       | 15822                                                  | 7567                                              |
| 35-39     | 0,00283                      | 23484                                                       | 19081                                                  | 6605                                              |
| 40-44     | 0,00288                      | 19821                                                       | 21872                                                  | 8885                                              |
| 45-49     | 0,00380                      | 15570                                                       | 22243                                                  | 2966                                              |
| 50-54     | 0,00630                      | 15307                                                       | 12118                                                  | 4464                                              |
| 55-59     | 0,00831                      | 8701                                                        | 9861                                                   | 4060                                              |

†Values used in this table are for the urban population

<sup>1</sup> Initial value used in the stock of not-overweight population in 2005 for middle SES.

<sup>2</sup> Initial value used in the stock of overweight population in 2005 for middle SES.

<sup>3</sup> Initial value used in the stock of obese population in 2005 for middle SES.

**Table 44. Women mortality rates and population size by age group for the middle socioeconomic status population (Oriental region) †**

| Age group | Mortality rates (R) (%/year) | Not- overweight women in 2005 (Number of people) <sup>1</sup> | Overweight women in 2005 (Number of people) <sup>2</sup> | Obese women in 2005 (Number of people) <sup>3</sup> |
|-----------|------------------------------|---------------------------------------------------------------|----------------------------------------------------------|-----------------------------------------------------|
| 0-4       | 0,00279                      | 66431                                                         | 14009                                                    | 1356                                                |
| 5-9       | 0,00025                      | 62410                                                         | 8383                                                     | 1863                                                |
| 10-14     | 0,00022                      | 68765                                                         | 7144                                                     | 0                                                   |
| 15-19     | 0,00048                      | 62776                                                         | 8862                                                     | 3693                                                |
| 20-24     | 0,00057                      | 49116                                                         | 17084                                                    | 5979                                                |
| 25-29     | 0,00062                      | 39177                                                         | 20642                                                    | 3370                                                |
| 30-34     | 0,00074                      | 24383                                                         | 23527                                                    | 10694                                               |
| 35-39     | 0,00093                      | 26277                                                         | 25866                                                    | 10675                                               |
| 40-44     | 0,00157                      | 17250                                                         | 16366                                                    | 10173                                               |
| 45-49     | 0,00211                      | 13135                                                         | 18157                                                    | 14294                                               |
| 50-54     | 0,00362                      | 9803                                                          | 10980                                                    | 9803                                                |
| 55-59     | 0,00537                      | 8624                                                          | 11910                                                    | 5339                                                |

†Values used in this table are for the urban population

<sup>1</sup> Initial value used in the stock of not-overweight population in 2005 for middle SES.

<sup>2</sup> Initial value used in the stock of overweight population in 2005 for middle SES.

<sup>3</sup> Initial value used in the stock of obese population in 2005 for middle SES.

**Table 45. Man mortality rates and population size by age group for the higher socioeconomic status population (Oriental region) †**

| Age group | Mortality rates (R) (%/year) | Not- overweight men in 2005 (Number of people) <sup>1</sup> | Overweight men in 2005 (Number of people) <sup>2</sup> | Obese men in 2005 (Number of people) <sup>3</sup> |
|-----------|------------------------------|-------------------------------------------------------------|--------------------------------------------------------|---------------------------------------------------|
| 0-4       | 0,00339                      | 65750                                                       | 20547                                                  | 7762                                              |
| 5-9       | 0,00029                      | 87473                                                       | 24455                                                  | 11287                                             |
| 10-14     | 0,00035                      | 102914                                                      | 13117                                                  | 12108                                             |
| 15-19     | 0,00119                      | 108772                                                      | 8587                                                   | 1908                                              |
| 20-24     | 0,00239                      | 82957                                                       | 25629                                                  | 8768                                              |
| 25-29     | 0,00273                      | 52667                                                       | 37306                                                  | 8778                                              |
| 30-34     | 0,00293                      | 41274                                                       | 33019                                                  | 11006                                             |
| 35-39     | 0,00283                      | 31557                                                       | 43299                                                  | 16879                                             |
| 40-44     | 0,00288                      | 28707                                                       | 39642                                                  | 12303                                             |
| 45-49     | 0,00380                      | 22243                                                       | 32623                                                  | 20760                                             |
| 50-54     | 0,00630                      | 17858                                                       | 29338                                                  | 14031                                             |
| 55-59     | 0,00831                      | 13922                                                       | 19722                                                  | 9861                                              |

†Values used in this table are for the urban population

<sup>1</sup> Initial value used in the stock of not-overweight population in 2005 for higher SES.

<sup>2</sup> Initial value used in the stock of overweight population in 2005 for higher SES.

<sup>3</sup> Initial value used in the stock of obese population in 2005 for higher SES.

**Table 46. Women mortality rates and population size by age group for the higher socioeconomic status population (Oriental region) †**

| Age group | Mortality rates (R) (%/year) | Not- overweight women in 2005 (Number of people) <sup>1</sup> | Overweight women in 2005 (Number of people) <sup>2</sup> | Obese women in 2005 (Number of people) <sup>3</sup> |
|-----------|------------------------------|---------------------------------------------------------------|----------------------------------------------------------|-----------------------------------------------------|
| 0-4       | 0,00279                      | 66431                                                         | 21240                                                    | 5423                                                |
| 5-9       | 0,00025                      | 96876                                                         | 18630                                                    | 7452                                                |
| 10-14     | 0,00022                      | 103594                                                        | 27685                                                    | 5358                                                |
| 15-19     | 0,00048                      | 107088                                                        | 19941                                                    | 3693                                                |
| 20-24     | 0,00057                      | 89263                                                         | 23917                                                    | 3417                                                |
| 25-29     | 0,00062                      | 62347                                                         | 29067                                                    | 9268                                                |

|              |         |       |       |       |
|--------------|---------|-------|-------|-------|
| <b>30-34</b> | 0,00074 | 50904 | 33793 | 14972 |
| <b>35-39</b> | 0,00093 | 52143 | 34488 | 17655 |
| <b>40-44</b> | 0,00157 | 37155 | 40693 | 28751 |
| <b>45-49</b> | 0,00211 | 21248 | 44814 | 21248 |
| <b>50-54</b> | 0,00362 | 15685 | 34899 | 20783 |
| <b>55-59</b> | 0,00537 | 9445  | 22998 | 19302 |

†Values used in this table are for the urban population

<sup>1</sup> Initial value used in the stock of not-overweight population in 2005 for higher SES.

<sup>2</sup> Initial value used in the stock of overweight population in 2005 for higher SES.

<sup>3</sup> Initial value used in the stock of obese population in 2005 for higher SES.

**Table 47. Data and projections of the Fertility rates by department and Region (Oriental region)<sup>†</sup>**

| Year        | Fecundity Rate Dept 15 | Fecundity Rate Depto 25 | Fecundity Rate Depto 50 | Fecundity Rate Depto 54 | Fecundity Rate Depto 68 | Region Average Fecundity Rate |
|-------------|------------------------|-------------------------|-------------------------|-------------------------|-------------------------|-------------------------------|
| <b>2005</b> | 2,8421                 | 2,6459                  | 2,7668                  | 2,7249                  | 2,2912                  | 1,659                         |
| <b>2006</b> | 2,7964                 | 2,5891                  | 2,7232                  | 2,6726                  | 2,2568                  | 1,630                         |
| <b>2007</b> | 2,7507                 | 2,5323                  | 2,6796                  | 2,6203                  | 2,2224                  | 1,601                         |
| <b>2008</b> | 2,705                  | 2,4755                  | 2,636                   | 2,568                   | 2,188                   | 1,572                         |
| <b>2009</b> | 2,6708                 | 2,4432                  | 2,6051                  | 2,5373                  | 2,172                   | 1,554                         |
| <b>2010</b> | 2,6366                 | 2,4109                  | 2,5742                  | 2,5066                  | 2,156                   | 1,536                         |
| <b>2011</b> | 2,6024                 | 2,3786                  | 2,5433                  | 2,4759                  | 2,14                    | 1,518                         |
| <b>2012</b> | 2,5682                 | 2,3463                  | 2,5124                  | 2,4452                  | 2,124                   | 1,500                         |
| <b>2013</b> | 2,534                  | 2,314                   | 2,4815                  | 2,4145                  | 2,108                   | 1,482                         |
| <b>2014</b> | 2,514                  | 2,2986                  | 2,4623                  | 2,3983                  | 2,1014                  | 1,472                         |
| <b>2015</b> | 2,494                  | 2,2832                  | 2,4431                  | 2,3821                  | 2,0948                  | 1,462                         |
| <b>2016</b> | 2,474                  | 2,2678                  | 2,4239                  | 2,3659                  | 2,0882                  | 1,452                         |
| <b>2017</b> | 2,454                  | 2,2524                  | 2,4047                  | 2,3497                  | 2,0816                  | 1,443                         |
| <b>2018</b> | 2,434                  | 2,237                   | 2,3855                  | 2,3335                  | 2,075                   | 1,433                         |
| <b>2019</b> | 2,414                  | 2,2216                  | 2,3663                  | 2,3173                  | 2,0684                  | 1,423                         |
| <b>2020</b> | 2,394                  | 2,2062                  | 2,3471                  | 2,3011                  | 2,0618                  | 1,414                         |
| <b>2021</b> | 2,374                  | 2,1908                  | 2,3279                  | 2,2849                  | 2,0552                  | 1,404                         |
| <b>2022</b> | 2,354                  | 2,1754                  | 2,3087                  | 2,2687                  | 2,0486                  | 1,394                         |
| <b>2023</b> | 2,334                  | 2,16                    | 2,2895                  | 2,2525                  | 2,042                   | 1,385                         |
| <b>2024</b> | 2,314                  | 2,1446                  | 2,2703                  | 2,2363                  | 2,0354                  | 1,375                         |
| <b>2025</b> | 2,294                  | 2,1292                  | 2,2511                  | 2,2201                  | 2,0288                  | 1,365                         |
| <b>2026</b> | 2,274                  | 2,1138                  | 2,2319                  | 2,2039                  | 2,0222                  | 1,356                         |
| <b>2027</b> | 2,254                  | 2,0984                  | 2,2127                  | 2,1877                  | 2,0156                  | 1,346                         |
| <b>2028</b> | 2,234                  | 2,083                   | 2,1935                  | 2,1715                  | 2,009                   | 1,336                         |
| <b>2029</b> | 2,214                  | 2,0676                  | 2,1743                  | 2,1553                  | 2,0024                  | 1,327                         |
| <b>2030</b> | 2,194                  | 2,0522                  | 2,1551                  | 2,1391                  | 1,9958                  | 1,317                         |

† Data of Fertility rate of DANE [1] was used to forecast the department's fertility rate from 2005 to 2030. Holt-Winters no seasonal method in EViews 5 (Quantitative Micro Software, LLC) was used to forecast the fertility rate. In the SD model we used data from 2005 to 2030 and the region fertility rate was calculated as the average

of all departments' fertility rates.

**Table 48. Fraction of births by departments, body mass index category, and socioeconomic status (Oriental region) †**

| Population group |                | Lower SES (%/year) | Middle SES (%/year) | Higher SES (%/year) | Complete Urban Population (%/year) |
|------------------|----------------|--------------------|---------------------|---------------------|------------------------------------|
| Department 15    | Not-overweight | 80,00%             | 71,43%              | 77,78%              | 76,92%                             |
|                  | Overweight     | 0,00%              | 14,29%              | 11,11%              | 7,69%                              |
|                  | Obese          | 20,00%             | 14,29%              | 11,11%              | 15,38%                             |
| Department 25    | Not-overweight | 71,43%             | 66,67%              | 57,14%              | 63,33%                             |
|                  | Overweight     | 28,57%             | 33,33%              | 28,57%              | 30,00%                             |
|                  | Obese          | 0,00%              | 0,00%               | 14,29%              | 6,67%                              |
| Department 50    | Not-overweight | 93,33%             | 83,33%              | 65,00%              | 79,25%                             |
|                  | Overweight     | 6,67%              | 5,56%               | 30,00%              | 15,09%                             |
|                  | Obese          | 0,00%              | 11,11%              | 5,00%               | 5,66%                              |
| Department 54    | Not-overweight | 76,47%             | 88,89%              | 77,78%              | 82,26%                             |
|                  | Overweight     | 17,65%             | 3,70%               | 22,22%              | 12,90%                             |
|                  | Obese          | 5,88%              | 7,41%               | 0,00%               | 4,84%                              |
| Department 68    | Not-overweight | 82,14%             | 73,68%              | 72,50%              | 76,87%                             |
|                  | Overweight     | 16,07%             | 18,42%              | 25,00%              | 19,40%                             |
|                  | Obese          | 1,79%              | 7,89%               | 2,50%               | 3,73%                              |

† The fractions of births by each BMI category correspond to the prevalences by BMI category of children aged 0 to 12 months

**Table 49. Prevalent rates of entire population by age group, and body mass index category (Oriental region)**

| Departments   | Age group | Not- overweight in 2005 | Overweight in 2005 | Obese in 2005 | Not- overweight in 2010 | Overweight in 2010 | Obese in 2010 |
|---------------|-----------|-------------------------|--------------------|---------------|-------------------------|--------------------|---------------|
| Department 15 | 0-4       | 0.76978                 | 0.13669            | 0.09353       | 0.69362                 | 0.23404            | 0.07234       |
|               | 5-9       | 0.80000                 | 0.20000            | 0.00000       | 0.80000                 | 0.15094            | 0.04906       |
|               | 10-14     | 0.82667                 | 0.13333            | 0.04000       | 0.78623                 | 0.17391            | 0.03986       |
|               | 15-19     | 0.86842                 | 0.10526            | 0.02632       | 0.82533                 | 0.14410            | 0.03057       |
|               | 20-24     | 0.80000                 | 0.16471            | 0.03529       | 0.70000                 | 0.24706            | 0.05294       |
|               | 25-29     | 0.70238                 | 0.23810            | 0.05952       | 0.60759                 | 0.29114            | 0.10127       |
|               | 30-34     | 0.47436                 | 0.42308            | 0.10256       | 0.46099                 | 0.32624            | 0.21277       |
|               | 35-39     | 0.47297                 | 0.40541            | 0.12162       | 0.45255                 | 0.36496            | 0.18248       |
|               | 40-44     | 0.38889                 | 0.41667            | 0.19444       | 0.33333                 | 0.42963            | 0.23704       |
|               | 45-49     | 0.26667                 | 0.41667            | 0.31667       | 0.32283                 | 0.45669            | 0.22047       |
|               | 50-54     | 0.20000                 | 0.52000            | 0.28000       | 0.18349                 | 0.53211            | 0.28440       |
| 55-59         | 0.20755   | 0.50943                 | 0.28302            | 0.16438       | 0.53425                 | 0.30137            |               |
| Department 25 | 0-4       | 0.73295                 | 0.20455            | 0.06250       | 0.70070                 | 0.25000            | 0.04930       |
|               | 5-9       | 0.75556                 | 0.15556            | 0.08889       | 0.74257                 | 0.20792            | 0.04950       |
|               | 10-14     | 0.75862                 | 0.18391            | 0.05747       | 0.81056                 | 0.14907            | 0.04037       |

| Departments      | Age group        | Not- overweight<br>in 2005 | Overweight<br>in 2005 | Obese in<br>2005 | Not- overweight<br>in 2010 | Overweight<br>in 2010 | Obese in<br>2010 |
|------------------|------------------|----------------------------|-----------------------|------------------|----------------------------|-----------------------|------------------|
|                  | 15-19            | 0.86585                    | 0.12195               | 0.01220          | 0.83883                    | 0.12454               | 0.03663          |
|                  | 20-24            | 0.67939                    | 0.27481               | 0.04580          | 0.72381                    | 0.20476               | 0.07143          |
|                  | 25-29            | 0.53175                    | 0.36508               | 0.10317          | 0.59694                    | 0.30102               | 0.10204          |
|                  | 30-34            | 0.53659                    | 0.30894               | 0.15447          | 0.49045                    | 0.33758               | 0.17197          |
|                  | 35-39            | 0.43119                    | 0.34862               | 0.22018          | 0.36054                    | 0.43537               | 0.20408          |
|                  | 40-44            | 0.37037                    | 0.33333               | 0.29630          | 0.34091                    | 0.45455               | 0.20455          |
|                  | 45-49            | 0.25581                    | 0.51163               | 0.23256          | 0.28571                    | 0.46429               | 0.25000          |
|                  | 50-54            | 0.23881                    | 0.47761               | 0.28358          | 0.21014                    | 0.49275               | 0.29710          |
|                  | 55-59            | 0.30303                    | 0.43939               | 0.25758          | 0.23750                    | 0.42500               | 0.33750          |
| Department<br>50 | 0-4              | 0.74545                    | 0.18636               | 0.06818          | 0.77429                    | 0.16286               | 0.06286          |
|                  | 5-9              | 0.79661                    | 0.14407               | 0.05932          | 0.78981                    | 0.13694               | 0.07325          |
|                  | 10-14            | 0.84167                    | 0.11667               | 0.04167          | 0.70056                    | 0.22034               | 0.07910          |
|                  | 15-19            | 0.88618                    | 0.09756               | 0.01626          | 0.80634                    | 0.15845               | 0.03521          |
|                  | 20-24            | 0.71508                    | 0.21788               | 0.06704          | 0.62295                    | 0.25000               | 0.12705          |
|                  | 25-29            | 0.59649                    | 0.30994               | 0.09357          | 0.56915                    | 0.25532               | 0.17553          |
|                  | 30-34            | 0.48092                    | 0.41985               | 0.09924          | 0.44920                    | 0.37433               | 0.17647          |
|                  | 35-39            | 0.47059                    | 0.37908               | 0.15033          | 0.39785                    | 0.41935               | 0.18280          |
|                  | 40-44            | 0.37302                    | 0.34127               | 0.28571          | 0.31844                    | 0.39106               | 0.29050          |
|                  | 45-49            | 0.29167                    | 0.45833               | 0.25000          | 0.31875                    | 0.46250               | 0.21875          |
|                  | 50-54            | 0.31532                    | 0.37838               | 0.30631          | 0.29245                    | 0.33962               | 0.36792          |
|                  | 55-59            | 0.27632                    | 0.46053               | 0.26316          | 0.29412                    | 0.47059               | 0.23529          |
|                  | Department<br>54 | 0-4                        | 0.72789               | 0.23129          | 0.04082                    | 0.82582               | 0.12090          |
| 5-9              | 0.86093          | 0.06623                    | 0.07285               | 0.81076          | 0.12749                    | 0.06175               |                  |
| 10-14            | 0.87692          | 0.09231                    | 0.03077               | 0.79412          | 0.12395                    | 0.08193               |                  |
| 15-19            | 0.85714          | 0.11310                    | 0.02976               | 0.80420          | 0.15152                    | 0.04429               |                  |
| 20-24            | 0.71595          | 0.23735                    | 0.04669               | 0.69333          | 0.22400                    | 0.08267               |                  |
| 25-29            | 0.62687          | 0.28358                    | 0.08955               | 0.57423          | 0.28571                    | 0.14006               |                  |
| 30-34            | 0.52198          | 0.34615                    | 0.13187               | 0.46926          | 0.31715                    | 0.21359               |                  |
| 35-39            | 0.44059          | 0.43069                    | 0.12871               | 0.40418          | 0.39024                    | 0.20557               |                  |
| 40-44            | 0.42857          | 0.40373                    | 0.16770               | 0.42529          | 0.39847                    | 0.17625               |                  |
| 45-49            | 0.29630          | 0.47531                    | 0.22840               | 0.35000          | 0.41923                    | 0.23077               |                  |
| 50-54            | 0.35200          | 0.38400                    | 0.26400               | 0.31156          | 0.43719                    | 0.25126               |                  |
| 55-59            | 0.40566          | 0.33019                    | 0.26415               | 0.30000          | 0.44118                    | 0.25882               |                  |
| Department<br>68 | 0-4              | 0.76744                    | 0.18140               | 0.05116          | 0.80201                    | 0.17293               | 0.02506          |
|                  | 5-9              | 0.77670                    | 0.17476               | 0.04854          | 0.75904                    | 0.14458               | 0.09639          |
|                  | 10-14            | 0.74436                    | 0.18797               | 0.06767          | 0.76264                    | 0.16264               | 0.07473          |
|                  | 15-19            | 0.87417                    | 0.09272               | 0.03311          | 0.72414                    | 0.19540               | 0.08046          |
|                  | 20-24            | 0.76650                    | 0.19797               | 0.03553          | 0.72776                    | 0.20755               | 0.06469          |
|                  | 25-29            | 0.61350                    | 0.31288               | 0.07362          | 0.51911                    | 0.34076               | 0.14013          |
|                  | 30-34            | 0.45294                    | 0.38235               | 0.16471          | 0.45745                    | 0.40071               | 0.14184          |
|                  | 35-39            | 0.47619                    | 0.34524               | 0.17857          | 0.41057                    | 0.41057               | 0.17886          |
|                  | 40-44            | 0.37778                    | 0.45556               | 0.16667          | 0.36218                    | 0.41667               | 0.22115          |
|                  | 45-49            | 0.31884                    | 0.45652               | 0.22464          | 0.30798                    | 0.41825               | 0.27376          |
|                  | 50-54            | 0.34783                    | 0.46957               | 0.18261          | 0.27094                    | 0.41379               | 0.31527          |
|                  | 55-59            | 0.25714                    | 0.48571               | 0.25714          | 0.33333                    | 0.36508               | 0.30159          |

**Table 50. Prevalent rates of lower socioeconomic status population by age group, and body mass index category (Oriental region)**

| Departments   | Age group | Not- overweight in 2005 | Overweight in 2005 | Obese in 2005 | Not- overweight in 2010 | Overweight in 2010 | Obese in 2010 |
|---------------|-----------|-------------------------|--------------------|---------------|-------------------------|--------------------|---------------|
| Department 15 | 0-4       | 0.74468                 | 0.12766            | 0.12766       | 0.69697                 | 0.21212            | 0.09091       |
|               | 5-9       | 0.77778                 | 0.22222            | 0.00000       | 0.84444                 | 0.13333            | 0.02222       |
|               | 10-14     | 0.83333                 | 0.16667            | 0.00000       | 0.77778                 | 0.20000            | 0.02222       |
|               | 15-19     | 0.80000                 | 0.13333            | 0.06667       | 0.84615                 | 0.12821            | 0.02564       |
|               | 20-24     | 0.72222                 | 0.22222            | 0.05556       | 0.66667                 | 0.29630            | 0.03704       |
|               | 25-29     | 0.76471                 | 0.17647            | 0.05882       | 0.58824                 | 0.23529            | 0.17647       |
|               | 30-34     | 0.55556                 | 0.44444            | 0.00000       | 0.33333                 | 0.33333            | 0.33333       |
|               | 35-39     | 0.45455                 | 0.45455            | 0.09091       | 0.56522                 | 0.21739            | 0.21739       |
|               | 40-44     | 0.44444                 | 0.38889            | 0.16667       | 0.40000                 | 0.40000            | 0.20000       |
|               | 45-49     | 0.12500                 | 0.37500            | 0.50000       | 0.52941                 | 0.41176            | 0.05882       |
|               | 50-54     | 0.60000                 | 0.20000            | 0.20000       | 0.11111                 | 0.44444            | 0.44444       |
| 55-59         | 0.08333   | 0.66667                 | 0.25000            | 0.33333       | 0.33333                 | 0.33333            |               |
| Department 25 | 0-4       | 0.75000                 | 0.20000            | 0.05000       | 0.71642                 | 0.23881            | 0.04478       |
|               | 5-9       | 0.87500                 | 0.12500            | 0.00000       | 0.75000                 | 0.18750            | 0.06250       |
|               | 10-14     | 0.86667                 | 0.13333            | 0.00000       | 0.89091                 | 0.09091            | 0.01818       |
|               | 15-19     | 0.66667                 | 0.00000            | 0.33333       | 0.81818                 | 0.12121            | 0.06061       |
|               | 20-24     | 0.70588                 | 0.23529            | 0.05882       | 0.90909                 | 0.06061            | 0.03030       |
|               | 25-29     | 0.43478                 | 0.39130            | 0.17391       | 0.54545                 | 0.36364            | 0.09091       |
|               | 30-34     | 0.50000                 | 0.37500            | 0.12500       | 0.62963                 | 0.25926            | 0.11111       |
|               | 35-39     | 0.41176                 | 0.41176            | 0.17647       | 0.30000                 | 0.50000            | 0.20000       |
|               | 40-44     | 0.47059                 | 0.35294            | 0.17647       | 0.64706                 | 0.05882            | 0.29412       |
|               | 45-49     | 0.22222                 | 0.55556            | 0.22222       | 0.38889                 | 0.27778            | 0.33333       |
|               | 50-54     | 0.16667                 | 0.50000            | 0.33333       | 0.40000                 | 0.35000            | 0.25000       |
| 55-59         | 0.28571   | 0.28571                 | 0.42857            | 0.33333       | 0.50000                 | 0.16667            |               |
| Department 50 | 0-4       | 0.80328                 | 0.13115            | 0.06557       | 0.76866                 | 0.18657            | 0.04478       |
|               | 5-9       | 0.94737                 | 0.00000            | 0.05263       | 0.84167                 | 0.12500            | 0.03333       |
|               | 10-14     | 0.93750                 | 0.06250            | 0.00000       | 0.80672                 | 0.16807            | 0.02521       |
|               | 15-19     | 0.86364                 | 0.13636            | 0.00000       | 0.84404                 | 0.13761            | 0.01835       |
|               | 20-24     | 0.75000                 | 0.21875            | 0.03125       | 0.67647                 | 0.22059            | 0.10294       |
|               | 25-29     | 0.59459                 | 0.27027            | 0.13514       | 0.49254                 | 0.35821            | 0.14925       |
|               | 30-34     | 0.48148                 | 0.48148            | 0.03704       | 0.50000                 | 0.42593            | 0.07407       |
|               | 35-39     | 0.61905                 | 0.28571            | 0.09524       | 0.48077                 | 0.44231            | 0.07692       |
|               | 40-44     | 0.68421                 | 0.21053            | 0.10526       | 0.34000                 | 0.36000            | 0.30000       |
|               | 45-49     | 0.43750                 | 0.50000            | 0.06250       | 0.40426                 | 0.40426            | 0.19149       |
|               | 50-54     | 0.50000                 | 0.28571            | 0.21429       | 0.27273                 | 0.50000            | 0.22727       |
| 55-59         | 0.71429   | 0.21429                 | 0.07143            | 0.47619       | 0.42857                 | 0.09524            |               |
| Department 54 | 0-4       | 0.74713                 | 0.24138            | 0.01149       | 0.83544                 | 0.10970            | 0.05485       |
|               | 5-9       | 0.92857                 | 0.02381            | 0.04762       | 0.88889                 | 0.08213            | 0.02899       |
|               | 10-14     | 0.92593                 | 0.07407            | 0.00000       | 0.87879                 | 0.08081            | 0.04040       |
|               | 15-19     | 0.92857                 | 0.04762            | 0.02381       | 0.88194                 | 0.09722            | 0.02083       |
|               | 20-24     | 0.70833                 | 0.27083            | 0.02083       | 0.72603                 | 0.20548            | 0.06849       |



| Departments   | Age group | Not- overweight in 2005 | Overweight in 2005 | Obese in 2005 | Not- overweight in 2010 | Overweight in 2010 | Obese in 2010 |
|---------------|-----------|-------------------------|--------------------|---------------|-------------------------|--------------------|---------------|
|               | 25-29     | 0.77778                 | 0.20000            | 0.02222       | 0.60000                 | 0.28750            | 0.11250       |
|               | 30-34     | 0.62162                 | 0.35135            | 0.02703       | 0.47706                 | 0.30275            | 0.22018       |
|               | 35-39     | 0.50000                 | 0.42500            | 0.07500       | 0.50000                 | 0.36585            | 0.13415       |
|               | 40-44     | 0.40000                 | 0.40000            | 0.20000       | 0.47297                 | 0.36486            | 0.16216       |
|               | 45-49     | 0.43478                 | 0.30435            | 0.26087       | 0.43056                 | 0.44444            | 0.12500       |
|               | 50-54     | 0.45000                 | 0.35000            | 0.20000       | 0.46032                 | 0.44444            | 0.09524       |
|               | 55-59     | 0.46429                 | 0.32143            | 0.21429       | 0.35417                 | 0.43750            | 0.20833       |
| Department 68 | 0-4       | 0.87500                 | 0.09375            | 0.03125       | 0.85714                 | 0.14286            | 0.00000       |
|               | 5-9       | 0.72222                 | 0.22222            | 0.05556       | 0.78947                 | 0.13684            | 0.07368       |
|               | 10-14     | 0.75000                 | 0.20000            | 0.05000       | 0.89873                 | 0.10127            | 0.00000       |
|               | 15-19     | 0.96429                 | 0.03571            | 0.00000       | 0.84722                 | 0.11111            | 0.04167       |
|               | 20-24     | 0.75000                 | 0.25000            | 0.00000       | 0.74138                 | 0.15517            | 0.10345       |
|               | 25-29     | 0.86667                 | 0.06667            | 0.06667       | 0.67391                 | 0.23913            | 0.08696       |
|               | 30-34     | 0.47368                 | 0.47368            | 0.05263       | 0.53333                 | 0.33333            | 0.13333       |
|               | 35-39     | 0.66667                 | 0.22222            | 0.11111       | 0.55882                 | 0.23529            | 0.20588       |
|               | 40-44     | 0.61905                 | 0.19048            | 0.19048       | 0.39583                 | 0.47917            | 0.12500       |
|               | 45-49     | 0.55556                 | 0.44444            | 0.00000       | 0.58621                 | 0.24138            | 0.17241       |
|               | 50-54     | 0.47059                 | 0.29412            | 0.23529       | 0.40000                 | 0.24000            | 0.36000       |
|               | 55-59     | 0.57143                 | 0.28571            | 0.14286       | 0.50000                 | 0.30000            | 0.20000       |

**Table 51. Prevalent rates of middle socioeconomic status population by age group, and body mass index category (Oriental region)**

| Departments   | Age group | Not- overweight in 2005 | Overweight in 2005 | Obese in 2005 | Not- overweight in 2010 | Overweight in 2010 | Obese in 2010 |
|---------------|-----------|-------------------------|--------------------|---------------|-------------------------|--------------------|---------------|
| Department 15 | 0-4       | 0.76190                 | 0.14286            | 0.09524       | 0.67619                 | 0.26667            | 0.05714       |
|               | 5-9       | 0.83333                 | 0.16667            | 0.00000       | 0.77778                 | 0.17094            | 0.05128       |
|               | 10-14     | 0.80952                 | 0.14286            | 0.04762       | 0.84906                 | 0.11321            | 0.03774       |
|               | 15-19     | 0.95238                 | 0.00000            | 0.04762       | 0.82143                 | 0.13095            | 0.04762       |
|               | 20-24     | 0.70000                 | 0.25000            | 0.05000       | 0.71233                 | 0.27397            | 0.01370       |
|               | 25-29     | 0.70370                 | 0.25926            | 0.03704       | 0.67164                 | 0.29851            | 0.02985       |
|               | 30-34     | 0.41667                 | 0.45833            | 0.12500       | 0.47761                 | 0.28358            | 0.23881       |
|               | 35-39     | 0.47619                 | 0.42857            | 0.09524       | 0.47619                 | 0.28571            | 0.23810       |
|               | 40-44     | 0.37500                 | 0.43750            | 0.18750       | 0.34146                 | 0.48780            | 0.17073       |
|               | 45-49     | 0.42105                 | 0.21053            | 0.36842       | 0.30000                 | 0.46000            | 0.24000       |
|               | 50-54     | 0.42857                 | 0.57143            | 0.00000       | 0.25000                 | 0.43182            | 0.31818       |
|               | 55-59     | 0.37500                 | 0.50000            | 0.12500       | 0.13636                 | 0.45455            | 0.40909       |
| Department 25 | 0-4       | 0.72414                 | 0.22414            | 0.05172       | 0.70330                 | 0.26374            | 0.03297       |
|               | 5-9       | 0.78947                 | 0.15789            | 0.05263       | 0.74775                 | 0.18919            | 0.06306       |
|               | 10-14     | 0.77778                 | 0.14815            | 0.07407       | 0.78889                 | 0.18889            | 0.02222       |
|               | 15-19     | 0.95652                 | 0.04348            | 0.00000       | 0.84722                 | 0.13889            | 0.01389       |
|               | 20-24     | 0.71154                 | 0.25000            | 0.03846       | 0.69444                 | 0.20833            | 0.09722       |
|               | 25-29     | 0.58974                 | 0.35897            | 0.05128       | 0.54098                 | 0.36066            | 0.09836       |
|               | 30-34     | 0.48649                 | 0.32432            | 0.18919       | 0.52632                 | 0.31579            | 0.15789       |
|               | 35-39     | 0.40741                 | 0.37037            | 0.22222       | 0.35593                 | 0.40678            | 0.23729       |
| 40-44         | 0.40741   | 0.37037                 | 0.22222            | 0.39583       | 0.45833                 | 0.14583            |               |

| Departments   | Age group | Not- overweight in 2005 | Overweight in 2005 | Obese in 2005 | Not- overweight in 2010 | Overweight in 2010 | Obese in 2010 |
|---------------|-----------|-------------------------|--------------------|---------------|-------------------------|--------------------|---------------|
|               | 45-49     | 0.23077                 | 0.61538            | 0.15385       | 0.33333                 | 0.42105            | 0.24561       |
|               | 50-54     | 0.48000                 | 0.36000            | 0.16000       | 0.26923                 | 0.50000            | 0.23077       |
|               | 55-59     | 0.33333                 | 0.44444            | 0.22222       | 0.22222                 | 0.44444            | 0.33333       |
| Department 50 | 0-4       | 0.77922                 | 0.15584            | 0.06494       | 0.79817                 | 0.15596            | 0.04587       |
|               | 5-9       | 0.75676                 | 0.13514            | 0.10811       | 0.81188                 | 0.11881            | 0.06931       |
|               | 10-14     | 0.84211                 | 0.10526            | 0.05263       | 0.70732                 | 0.21951            | 0.07317       |
|               | 15-19     | 0.89474                 | 0.10526            | 0.00000       | 0.84146                 | 0.10976            | 0.04878       |
|               | 20-24     | 0.62500                 | 0.25000            | 0.12500       | 0.68421                 | 0.25263            | 0.06316       |
|               | 25-29     | 0.57407                 | 0.31481            | 0.11111       | 0.63793                 | 0.18966            | 0.17241       |
|               | 30-34     | 0.41379                 | 0.44828            | 0.13793       | 0.47273                 | 0.36364            | 0.16364       |
|               | 35-39     | 0.42553                 | 0.38298            | 0.19149       | 0.40000                 | 0.41538            | 0.18462       |
|               | 40-44     | 0.36111                 | 0.33333            | 0.30556       | 0.33929                 | 0.37500            | 0.28571       |
|               | 45-49     | 0.33333                 | 0.41026            | 0.25641       | 0.31915                 | 0.48936            | 0.19149       |
|               | 50-54     | 0.20000                 | 0.43333            | 0.36667       | 0.25926                 | 0.18519            | 0.55556       |
|               | 55-59     | 0.31818                 | 0.54545            | 0.13636       | 0.27273                 | 0.50000            | 0.22727       |
| Department 54 | 0-4       | 0.79091                 | 0.18182            | 0.02727       | 0.82682                 | 0.11732            | 0.05587       |
|               | 5-9       | 0.94444                 | 0.03704            | 0.01852       | 0.80645                 | 0.14516            | 0.04839       |
|               | 10-14     | 0.89286                 | 0.10714            | 0.00000       | 0.79070                 | 0.12791            | 0.08140       |
|               | 15-19     | 0.84127                 | 0.12698            | 0.03175       | 0.78363                 | 0.15789            | 0.05848       |
|               | 20-24     | 0.73118                 | 0.23656            | 0.03226       | 0.69014                 | 0.21127            | 0.09859       |
|               | 25-29     | 0.60606                 | 0.30303            | 0.09091       | 0.55738                 | 0.28689            | 0.15574       |
|               | 30-34     | 0.55882                 | 0.27941            | 0.16176       | 0.54032                 | 0.30645            | 0.15323       |
|               | 35-39     | 0.43421                 | 0.43421            | 0.13158       | 0.37879                 | 0.40152            | 0.21970       |
|               | 40-44     | 0.40000                 | 0.45455            | 0.14545       | 0.46226                 | 0.32075            | 0.21698       |
|               | 45-49     | 0.36364                 | 0.41818            | 0.21818       | 0.27184                 | 0.44660            | 0.28155       |
|               | 50-54     | 0.42105                 | 0.26316            | 0.31579       | 0.25000                 | 0.42647            | 0.32353       |
|               | 55-59     | 0.45455                 | 0.36364            | 0.18182       | 0.32308                 | 0.43077            | 0.24615       |
| Department 68 | 0-4       | 0.769231                | 0.179487           | 0.051282      | 0.74257                 | 0.22772            | 0.02970       |
|               | 5-9       | 0.851852                | 0.111111           | 0.037037      | 0.80723                 | 0.10843            | 0.08434       |
|               | 10-14     | 0.787879                | 0.151515           | 0.060606      | 0.73585                 | 0.20755            | 0.05660       |
|               | 15-19     | 0.763158                | 0.157895           | 0.078947      | 0.72603                 | 0.19178            | 0.08219       |
|               | 20-24     | 0.760000                | 0.180000           | 0.060000      | 0.74257                 | 0.21782            | 0.03960       |
|               | 25-29     | 0.583333                | 0.354167           | 0.062500      | 0.56250                 | 0.32813            | 0.10938       |
|               | 30-34     | 0.346154                | 0.442308           | 0.211538      | 0.46875                 | 0.42188            | 0.10938       |
|               | 35-39     | 0.448980                | 0.387755           | 0.163265      | 0.41509                 | 0.37736            | 0.20755       |
|               | 40-44     | 0.410256                | 0.384615           | 0.205128      | 0.43077                 | 0.38462            | 0.18462       |
|               | 45-49     | 0.235294                | 0.529412           | 0.235294      | 0.37681                 | 0.40580            | 0.21739       |
|               | 50-54     | 0.428571                | 0.392857           | 0.178571      | 0.18421                 | 0.47368            | 0.34211       |
|               | 55-59     | 0.153846                | 0.461538           | 0.384615      | 0.32353                 | 0.38235            | 0.29412       |

**Table 52. Prevalent rates of higher socioeconomic status population by age group, and body mass index category (Oriental region)**

| Departments   | Age group | Not- overweight in 2005 | Overweight in 2005 | Obese in 2005 | Not- overweight in 2010 | Overweight in 2010 | Obese in 2010 |
|---------------|-----------|-------------------------|--------------------|---------------|-------------------------|--------------------|---------------|
| Department 15 | 0-4       | 0.80000                 | 0.14000            | 0.06000       | 0.71134                 | 0.20619            | 0.08247       |
|               | 5-9       | 0.78788                 | 0.21212            | 0.00000       | 0.80583                 | 0.13592            | 0.05825       |
|               | 10-14     | 0.83333                 | 0.11905            | 0.04762       | 0.73600                 | 0.21600            | 0.04800       |
|               | 15-19     | 0.85000                 | 0.15000            | 0.00000       | 0.82075                 | 0.16038            | 0.01887       |
|               | 20-24     | 0.87234                 | 0.10638            | 0.02128       | 0.70000                 | 0.20000            | 0.10000       |
|               | 25-29     | 0.67500                 | 0.25000            | 0.07500       | 0.55405                 | 0.29730            | 0.14865       |
|               | 30-34     | 0.47222                 | 0.38889            | 0.13889       | 0.46774                 | 0.37097            | 0.16129       |
|               | 35-39     | 0.47619                 | 0.38095            | 0.14286       | 0.40278                 | 0.45833            | 0.13889       |
|               | 40-44     | 0.36842                 | 0.42105            | 0.21053       | 0.31646                 | 0.40506            | 0.27848       |
|               | 45-49     | 0.21212                 | 0.54545            | 0.24242       | 0.28333                 | 0.46667            | 0.25000       |
|               | 50-54     | 0.10526                 | 0.55263            | 0.34211       | 0.14286                 | 0.62500            | 0.23214       |
|               | 55-59     | 0.16000                 | 0.44000            | 0.40000       | 0.15556                 | 0.60000            | 0.24444       |
| Department 25 | 0-4       | 0.73077                 | 0.19231            | 0.07692       | 0.69048                 | 0.24603            | 0.06349       |
|               | 5-9       | 0.70909                 | 0.16364            | 0.12727       | 0.73611                 | 0.22917            | 0.03472       |
|               | 10-14     | 0.71111                 | 0.22222            | 0.06667       | 0.79661                 | 0.14689            | 0.05650       |
|               | 15-19     | 0.80392                 | 0.17647            | 0.01961       | 0.83929                 | 0.11905            | 0.04167       |
|               | 20-24     | 0.64516                 | 0.30645            | 0.04839       | 0.68571                 | 0.24762            | 0.06667       |
|               | 25-29     | 0.53125                 | 0.35938            | 0.10938       | 0.64706                 | 0.24510            | 0.10784       |
|               | 30-34     | 0.57143                 | 0.28571            | 0.14286       | 0.41096                 | 0.38356            | 0.20548       |
|               | 35-39     | 0.44615                 | 0.32308            | 0.23077       | 0.38235                 | 0.44118            | 0.17647       |
|               | 40-44     | 0.32813                 | 0.31250            | 0.35938       | 0.27027                 | 0.51351            | 0.21622       |
|               | 45-49     | 0.27451                 | 0.45098            | 0.27451       | 0.23656                 | 0.52688            | 0.23656       |
|               | 50-54     | 0.08333                 | 0.55556            | 0.36111       | 0.15217                 | 0.52174            | 0.32609       |
|               | 55-59     | 0.29268                 | 0.46341            | 0.24390       | 0.23214                 | 0.41071            | 0.35714       |
| Department 50 | 0-4       | 0.67073                 | 0.25610            | 0.07317       | 0.75701                 | 0.14019            | 0.10280       |
|               | 5-9       | 0.77419                 | 0.19355            | 0.03226       | 0.69892                 | 0.17204            | 0.12903       |
|               | 10-14     | 0.81818                 | 0.13636            | 0.04545       | 0.58036                 | 0.27679            | 0.14286       |
|               | 15-19     | 0.90411                 | 0.06849            | 0.02740       | 0.73118                 | 0.22581            | 0.04301       |
|               | 20-24     | 0.74747                 | 0.20202            | 0.05051       | 0.50617                 | 0.27160            | 0.22222       |
|               | 25-29     | 0.61250                 | 0.32500            | 0.06250       | 0.58730                 | 0.20635            | 0.20635       |
|               | 30-34     | 0.50667                 | 0.38667            | 0.10667       | 0.39744                 | 0.34615            | 0.25641       |
|               | 35-39     | 0.45882                 | 0.40000            | 0.14118       | 0.33333                 | 0.40580            | 0.26087       |
|               | 40-44     | 0.29577                 | 0.38028            | 0.32394       | 0.28767                 | 0.42466            | 0.28767       |
|               | 45-49     | 0.23077                 | 0.47692            | 0.29231       | 0.25758                 | 0.48485            | 0.25758       |
|               | 50-54     | 0.32836                 | 0.37313            | 0.29851       | 0.31579                 | 0.35088            | 0.33333       |
|               | 55-59     | 0.10000                 | 0.50000            | 0.40000       | 0.21429                 | 0.47619            | 0.30952       |
| Department 54 | 0-4       | 0.63918                 | 0.27835            | 0.08247       | 0.79167                 | 0.16667            | 0.04167       |
|               | 5-9       | 0.72727                 | 0.12727            | 0.14545       | 0.66972                 | 0.18349            | 0.14679       |
|               | 10-14     | 0.82979                 | 0.08511            | 0.08511       | 0.64151                 | 0.19811            | 0.16038       |
|               | 15-19     | 0.82540                 | 0.14286            | 0.03175       | 0.73684                 | 0.21053            | 0.05263       |
|               | 20-24     | 0.70690                 | 0.22414            | 0.06897       | 0.64368                 | 0.27586            | 0.08046       |
|               | 25-29     | 0.56667                 | 0.31111            | 0.12222       | 0.54667                 | 0.28000            | 0.17333       |
|               | 30-34     | 0.44156                 | 0.40260            | 0.15584       | 0.34211                 | 0.35526            | 0.30263       |
|               | 35-39     | 0.41860                 | 0.43023            | 0.15116       | 0.34247                 | 0.39726            | 0.26027       |
| 40-44         | 0.46970   | 0.36364                 | 0.16667            | 0.33333       | 0.53086                 | 0.13580            |               |

| Departments   | Age group | Not- overweight in 2005 | Overweight in 2005 | Obese in 2005 | Not- overweight in 2010 | Overweight in 2010 | Obese in 2010 |
|---------------|-----------|-------------------------|--------------------|---------------|-------------------------|--------------------|---------------|
|               | 45-49     | 0.21429                 | 0.55952            | 0.22619       | 0.37647                 | 0.36471            | 0.25882       |
|               | 50-54     | 0.28358                 | 0.46269            | 0.25373       | 0.23529                 | 0.44118            | 0.32353       |
|               | 55-59     | 0.33333                 | 0.31111            | 0.35556       | 0.22807                 | 0.45614            | 0.31579       |
| Department 68 | 0-4       | 0.73333                 | 0.20952            | 0.05714       | 0.80676                 | 0.15942            | 0.03382       |
|               | 5-9       | 0.75862                 | 0.18966            | 0.05172       | 0.72996                 | 0.16034            | 0.10970       |
|               | 10-14     | 0.72500                 | 0.20000            | 0.07500       | 0.73333                 | 0.16296            | 0.10370       |
|               | 15-19     | 0.89412                 | 0.08235            | 0.02353       | 0.69484                 | 0.21596            | 0.08920       |
|               | 20-24     | 0.77236                 | 0.19512            | 0.03252       | 0.71698                 | 0.21698            | 0.06604       |
|               | 25-29     | 0.59000                 | 0.33000            | 0.08000       | 0.47059                 | 0.36765            | 0.16176       |
|               | 30-34     | 0.50505                 | 0.33333            | 0.16162       | 0.43353                 | 0.41040            | 0.15607       |
|               | 35-39     | 0.45545                 | 0.34653            | 0.19802       | 0.37736                 | 0.45912            | 0.16352       |
|               | 40-44     | 0.32500                 | 0.52500            | 0.15000       | 0.33166                 | 0.41206            | 0.25628       |
|               | 45-49     | 0.32632                 | 0.43158            | 0.24211       | 0.23030                 | 0.45455            | 0.31515       |
|               | 50-54     | 0.28571                 | 0.54286            | 0.17143       | 0.27143                 | 0.42857            | 0.30000       |
|               | 55-59     | 0.24000                 | 0.52000            | 0.24000       | 0.31111                 | 0.37037            | 0.31852       |

**Table 53. Mortality rates for departments and population size by age group without segregate by socioeconomic status (Oriental region) †**

| Departments   | Age group | Mortality rates (R) (%/year) | Not- overweight population in 2005 (Number of people)1 | Overweight population in 2005 (Number of people)2 | Obese population in 2005 (Number of people)3 |
|---------------|-----------|------------------------------|--------------------------------------------------------|---------------------------------------------------|----------------------------------------------|
| Department 15 | 0-4       | 0.00348                      | 46632                                                  | 8280                                              | 5666                                         |
|               | 5-9       | 0.00037                      | 51323                                                  | 12831                                             | 0                                            |
|               | 10-14     | 0.00029                      | 54874                                                  | 8851                                              | 2655                                         |
|               | 15-19     | 0.00083                      | 53331                                                  | 6464                                              | 1616                                         |
|               | 20-24     | 0.00120                      | 42790                                                  | 8810                                              | 1888                                         |
|               | 25-29     | 0.00147                      | 33519                                                  | 11362                                             | 2841                                         |
|               | 30-34     | 0.00137                      | 21103                                                  | 18822                                             | 4563                                         |
|               | 35-39     | 0.00166                      | 21422                                                  | 18362                                             | 5509                                         |
|               | 40-44     | 0.00231                      | 16324                                                  | 17490                                             | 8162                                         |
|               | 45-49     | 0.00247                      | 9627                                                   | 15043                                             | 11433                                        |
|               | 50-54     | 0.00445                      | 6016                                                   | 15643                                             | 8423                                         |
| 55-59         | 0.00649   | 4990                         | 12248                                                  | 6805                                              |                                              |
| Department 25 | 0-4       | 0.00328                      | 99214                                                  | 27688                                             | 8460                                         |
|               | 5-9       | 0.00020                      | 106953                                                 | 22020                                             | 12583                                        |
|               | 10-14     | 0.00031                      | 112889                                                 | 27367                                             | 8552                                         |
|               | 15-19     | 0.00068                      | 128656                                                 | 18121                                             | 1812                                         |
|               | 20-24     | 0.00119                      | 83108                                                  | 33617                                             | 5603                                         |
|               | 25-29     | 0.00124                      | 57872                                                  | 39733                                             | 11229                                        |
|               | 30-34     | 0.00131                      | 53493                                                  | 30799                                             | 15400                                        |
|               | 35-39     | 0.00136                      | 46239                                                  | 37385                                             | 23611                                        |
|               | 40-44     | 0.00157                      | 38320                                                  | 34488                                             | 30656                                        |
|               | 45-49     | 0.00250                      | 21473                                                  | 42945                                             | 19520                                        |
| 50-54         | 0.00391   | 15822                        | 31643                                                  | 18788                                             |                                              |

| Departments   | Age group | Mortality rates (R) (%/year) | Not- overweight population in 2005 (Number of people) <sup>1</sup> | Overweight population in 2005 (Number of people) <sup>2</sup> | Obese population in 2005 (Number of people) <sup>3</sup> |
|---------------|-----------|------------------------------|--------------------------------------------------------------------|---------------------------------------------------------------|----------------------------------------------------------|
|               | 55-59     | 0.00605                      | 15582                                                              | 22594                                                         | 13245                                                    |
| Department 50 | 0-4       | 0.00387                      | 43508                                                              | 10877                                                         | 3979                                                     |
|               | 5-9       | 0.00043                      | 46087                                                              | 8335                                                          | 3432                                                     |
|               | 10-14     | 0.00045                      | 50731                                                              | 7032                                                          | 2511                                                     |
|               | 15-19     | 0.00087                      | 51970                                                              | 5721                                                          | 954                                                      |
|               | 20-24     | 0.00204                      | 37181                                                              | 11329                                                         | 3486                                                     |
|               | 25-29     | 0.00231                      | 28361                                                              | 14737                                                         | 4449                                                     |
|               | 30-34     | 0.00221                      | 20217                                                              | 17650                                                         | 4172                                                     |
|               | 35-39     | 0.00245                      | 19584                                                              | 15776                                                         | 6256                                                     |
|               | 40-44     | 0.00312                      | 14121                                                              | 12919                                                         | 10816                                                    |
|               | 45-49     | 0.00332                      | 8880                                                               | 13954                                                         | 7611                                                     |
|               | 50-54     | 0.00537                      | 7335                                                               | 8803                                                          | 7126                                                     |
|               | 55-59     | 0.00707                      | 4965                                                               | 8274                                                          | 4728                                                     |
| Department 54 | 0-4       | 0.00288                      | 71295                                                              | 22654                                                         | 3998                                                     |
|               | 5-9       | 0.00027                      | 89750                                                              | 6904                                                          | 7594                                                     |
|               | 10-14     | 0.00025                      | 86793                                                              | 9136                                                          | 3045                                                     |
|               | 15-19     | 0.00112                      | 79891                                                              | 10541                                                         | 2774                                                     |
|               | 20-24     | 0.00208                      | 61394                                                              | 20353                                                         | 4004                                                     |
|               | 25-29     | 0.00221                      | 46821                                                              | 21181                                                         | 6689                                                     |
|               | 30-34     | 0.00286                      | 34368                                                              | 22791                                                         | 8682                                                     |
|               | 35-39     | 0.00251                      | 28618                                                              | 27975                                                         | 8360                                                     |
|               | 40-44     | 0.00310                      | 25813                                                              | 24316                                                         | 10101                                                    |
|               | 45-49     | 0.00390                      | 14831                                                              | 23792                                                         | 11433                                                    |
|               | 50-54     | 0.00619                      | 14055                                                              | 15332                                                         | 10541                                                    |
|               | 55-59     | 0.00799                      | 12591                                                              | 10249                                                         | 8199                                                     |
| Department 68 | 0-4       | 0.00252                      | 93646                                                              | 22135                                                         | 6243                                                     |
|               | 5-9       | 0.00024                      | 104748                                                             | 23568                                                         | 6547                                                     |
|               | 10-14     | 0.00022                      | 105922                                                             | 26748                                                         | 9629                                                     |
|               | 15-19     | 0.00079                      | 120047                                                             | 12732                                                         | 4547                                                     |
|               | 20-24     | 0.00119                      | 98073                                                              | 25330                                                         | 4546                                                     |
|               | 25-29     | 0.00143                      | 70983                                                              | 36202                                                         | 8518                                                     |
|               | 30-34     | 0.00151                      | 47108                                                              | 39766                                                         | 17130                                                    |
|               | 35-39     | 0.00166                      | 50215                                                              | 36406                                                         | 18831                                                    |
|               | 40-44     | 0.00186                      | 37523                                                              | 45249                                                         | 16554                                                    |
|               | 45-49     | 0.00273                      | 25817                                                              | 36965                                                         | 18189                                                    |
|               | 50-54     | 0.00506                      | 22356                                                              | 30181                                                         | 11737                                                    |
|               | 55-59     | 0.00666                      | 13314                                                              | 25148                                                         | 13314                                                    |

<sup>†</sup>Values used in this table are for the urban population

<sup>1</sup> Initial value used in the stock of not-overweight population in 2005.

<sup>2</sup> Initial value used in the stock of overweight population in 2005.

<sup>3</sup> Initial value used in the stock of obese population in 2005.

**Table 54. Mortality rates and population size by age group at the department level for the lower socioeconomic status population (Oriental region) <sup>†</sup>**

| Departments   | Age group | Mortality rates (R) (%/year) | Not- overweight population in 2005 (Number of people) <sup>1</sup> | Overweight population in 2005 (Number of people) <sup>2</sup> | Obese population in 2005 (Number of people) <sup>3</sup> |
|---------------|-----------|------------------------------|--------------------------------------------------------------------|---------------------------------------------------------------|----------------------------------------------------------|
| Department 15 | 0-4       | 0.00348                      | 15253                                                              | 2615                                                          | 2615                                                     |
|               | 5-9       | 0.00037                      | 11975                                                              | 3422                                                          | 0                                                        |
|               | 10-14     | 0.00029                      | 8851                                                               | 1770                                                          | 0                                                        |
|               | 15-19     | 0.00083                      | 9697                                                               | 1616                                                          | 808                                                      |
|               | 20-24     | 0.00120                      | 8180                                                               | 2517                                                          | 629                                                      |
|               | 25-29     | 0.00147                      | 7386                                                               | 1704                                                          | 568                                                      |
|               | 30-34     | 0.00137                      | 5704                                                               | 4563                                                          | 0                                                        |
|               | 35-39     | 0.00166                      | 3060                                                               | 3060                                                          | 612                                                      |
|               | 40-44     | 0.00231                      | 4664                                                               | 4081                                                          | 1749                                                     |
|               | 45-49     | 0.00247                      | 602                                                                | 1805                                                          | 2407                                                     |
|               | 50-54     | 0.00445                      | 1805                                                               | 602                                                           | 602                                                      |
|               | 55-59     | 0.00649                      | 454                                                                | 3629                                                          | 1361                                                     |
| Department 25 | 0-4       | 0.00328                      | 23073                                                              | 6153                                                          | 1538                                                     |
|               | 5-9       | 0.00020                      | 22020                                                              | 3146                                                          | 0                                                        |
|               | 10-14     | 0.00031                      | 22236                                                              | 3421                                                          | 0                                                        |
|               | 15-19     | 0.00068                      | 13822                                                              | 0                                                             | 6911                                                     |
|               | 20-24     | 0.00119                      | 11206                                                              | 3735                                                          | 934                                                      |
|               | 25-29     | 0.00124                      | 8638                                                               | 7774                                                          | 3455                                                     |
|               | 30-34     | 0.00131                      | 6484                                                               | 4863                                                          | 1621                                                     |
|               | 35-39     | 0.00136                      | 6887                                                               | 6887                                                          | 2951                                                     |
|               | 40-44     | 0.00157                      | 7664                                                               | 5748                                                          | 2874                                                     |
|               | 45-49     | 0.00250                      | 1952                                                               | 4880                                                          | 1952                                                     |
|               | 50-54     | 0.00391                      | 989                                                                | 2967                                                          | 1978                                                     |
|               | 55-59     | 0.00605                      | 1558                                                               | 1558                                                          | 2337                                                     |
| Department 50 | 0-4       | 0.00387                      | 12999                                                              | 2122                                                          | 1061                                                     |
|               | 5-9       | 0.00043                      | 8825                                                               | 0                                                             | 490                                                      |
|               | 10-14     | 0.00045                      | 7534                                                               | 502                                                           | 0                                                        |
|               | 15-19     | 0.00087                      | 8378                                                               | 1323                                                          | 0                                                        |
|               | 20-24     | 0.00204                      | 6971                                                               | 2033                                                          | 290                                                      |
|               | 25-29     | 0.00231                      | 6117                                                               | 2781                                                          | 1390                                                     |
|               | 30-34     | 0.00221                      | 4172                                                               | 4172                                                          | 321                                                      |
|               | 35-39     | 0.00245                      | 3536                                                               | 1632                                                          | 544                                                      |
|               | 40-44     | 0.00312                      | 3906                                                               | 1202                                                          | 601                                                      |
|               | 45-49     | 0.00332                      | 1776                                                               | 2030                                                          | 254                                                      |
|               | 50-54     | 0.00537                      | 1467                                                               | 838                                                           | 629                                                      |
|               | 55-59     | 0.00707                      | 2364                                                               | 709                                                           | 236                                                      |
| Department 54 | 0-4       | 0.00288                      | 21655                                                              | 6996                                                          | 333                                                      |
|               | 5-9       | 0.00027                      | 26925                                                              | 690                                                           | 1381                                                     |
|               | 10-14     | 0.00025                      | 19034                                                              | 1523                                                          | 0                                                        |
|               | 15-19     | 0.00112                      | 21637                                                              | 1110                                                          | 555                                                      |
|               | 20-24     | 0.00208                      | 11344                                                              | 4338                                                          | 334                                                      |
|               | 25-29     | 0.00221                      | 13006                                                              | 3344                                                          | 372                                                      |
|               | 30-34     | 0.00286                      | 8321                                                               | 4703                                                          | 362                                                      |
|               | 35-39     | 0.00251                      | 6431                                                               | 5466                                                          | 965                                                      |

| Departments   | Age group | Mortality rates (R) (%/year) | Not- overweight population in 2005 (Number of people) <sup>1</sup> | Overweight population in 2005 (Number of people) <sup>2</sup> | Obese population in 2005 (Number of people) <sup>3</sup> |
|---------------|-----------|------------------------------|--------------------------------------------------------------------|---------------------------------------------------------------|----------------------------------------------------------|
|               | 40-44     | 0.00310                      | 5986                                                               | 5986                                                          | 2993                                                     |
|               | 45-49     | 0.00390                      | 3090                                                               | 2163                                                          | 1854                                                     |
|               | 50-54     | 0.00619                      | 2875                                                               | 2236                                                          | 1278                                                     |
|               | 55-59     | 0.00799                      | 3807                                                               | 2635                                                          | 1757                                                     |
| Department 68 | 0-4       | 0.00252                      | 15891                                                              | 1703                                                          | 568                                                      |
|               | 5-9       | 0.00024                      | 17022                                                              | 5237                                                          | 1309                                                     |
|               | 10-14     | 0.00022                      | 16049                                                              | 4280                                                          | 1070                                                     |
|               | 15-19     | 0.00079                      | 24555                                                              | 909                                                           | 0                                                        |
|               | 20-24     | 0.00119                      | 11691                                                              | 3897                                                          | 0                                                        |
|               | 25-29     | 0.00143                      | 9228                                                               | 710                                                           | 710                                                      |
|               | 30-34     | 0.00151                      | 5506                                                               | 5506                                                          | 612                                                      |
|               | 35-39     | 0.00166                      | 7532                                                               | 2511                                                          | 1255                                                     |
|               | 40-44     | 0.00186                      | 7174                                                               | 2207                                                          | 2207                                                     |
|               | 45-49     | 0.00273                      | 2934                                                               | 2347                                                          | 0                                                        |
|               | 50-54     | 0.00506                      | 4471                                                               | 2795                                                          | 2236                                                     |
|               | 55-59     | 0.00666                      | 2959                                                               | 1479                                                          | 740                                                      |

<sup>†</sup>Values used in this table are for the urban population

<sup>1</sup> Initial value used in the stock of not-overweight population in 2005 for lower SES.

<sup>2</sup> Initial value used in the stock of overweight population in 2005 for lower SES.

<sup>3</sup> Initial value used in the stock of obese population in 2005 for lower SES.

**Table 55. Mortality rates and population size by age group at the department level for the middle socioeconomic status population (Oriental region) <sup>†</sup>**

| Departments   | Age group | Mortality rates (R) (%/year) | Not- overweight population in 2005 (Number of people) <sup>1</sup> | Overweight population in 2005 (Number of people) <sup>2</sup> | Obese population in 2005 (Number of people) <sup>3</sup> |
|---------------|-----------|------------------------------|--------------------------------------------------------------------|---------------------------------------------------------------|----------------------------------------------------------|
| Department 15 | 0-4       | 0.00348                      | 13946                                                              | 2615                                                          | 1743                                                     |
|               | 5-9       | 0.00037                      | 17108                                                              | 3422                                                          | 0                                                        |
|               | 10-14     | 0.00029                      | 15046                                                              | 2655                                                          | 885                                                      |
|               | 15-19     | 0.00083                      | 16161                                                              | 0                                                             | 808                                                      |
|               | 20-24     | 0.00120                      | 8810                                                               | 3146                                                          | 629                                                      |
|               | 25-29     | 0.00147                      | 10794                                                              | 3977                                                          | 568                                                      |
|               | 30-34     | 0.00137                      | 5704                                                               | 6274                                                          | 1711                                                     |
|               | 35-39     | 0.00166                      | 6121                                                               | 5509                                                          | 1224                                                     |
|               | 40-44     | 0.00231                      | 3498                                                               | 4081                                                          | 1749                                                     |
|               | 45-49     | 0.00247                      | 4814                                                               | 2407                                                          | 4212                                                     |
|               | 50-54     | 0.00445                      | 1805                                                               | 2407                                                          | 0                                                        |
|               | 55-59     | 0.00649                      | 2722                                                               | 3629                                                          | 907                                                      |
| Department 25 | 0-4       | 0.00328                      | 32302                                                              | 9998                                                          | 2307                                                     |
|               | 5-9       | 0.00020                      | 23593                                                              | 4719                                                          | 1573                                                     |
|               | 10-14     | 0.00031                      | 35919                                                              | 6842                                                          | 3421                                                     |
|               | 15-19     | 0.00068                      | 38011                                                              | 1728                                                          | 0                                                        |
|               | 20-24     | 0.00119                      | 34550                                                              | 12139                                                         | 1868                                                     |
|               | 25-29     | 0.00124                      | 19867                                                              | 12093                                                         | 1728                                                     |

| Departments   | Age group | Mortality rates (R) (%/year) | Not- overweight population in 2005 (Number of people) <sup>1</sup> | Overweight population in 2005 (Number of people) <sup>2</sup> | Obese population in 2005 (Number of people) <sup>3</sup> |
|---------------|-----------|------------------------------|--------------------------------------------------------------------|---------------------------------------------------------------|----------------------------------------------------------|
|               | 30-34     | 0.00131                      | 14589                                                              | 9726                                                          | 5674                                                     |
|               | 35-39     | 0.00136                      | 10822                                                              | 9838                                                          | 5903                                                     |
|               | 40-44     | 0.00157                      | 10538                                                              | 9580                                                          | 5748                                                     |
|               | 45-49     | 0.00250                      | 5856                                                               | 15616                                                         | 3904                                                     |
|               | 50-54     | 0.00391                      | 11866                                                              | 8900                                                          | 3955                                                     |
|               | 55-59     | 0.00605                      | 4675                                                               | 6233                                                          | 3116                                                     |
| Department 50 | 0-4       | 0.00387                      | 15918                                                              | 3184                                                          | 1326                                                     |
|               | 5-9       | 0.00043                      | 13728                                                              | 2451                                                          | 1961                                                     |
|               | 10-14     | 0.00045                      | 16073                                                              | 2009                                                          | 1005                                                     |
|               | 15-19     | 0.00087                      | 14992                                                              | 1764                                                          | 0                                                        |
|               | 20-24     | 0.00204                      | 8714                                                               | 3486                                                          | 1743                                                     |
|               | 25-29     | 0.00231                      | 8620                                                               | 4727                                                          | 1668                                                     |
|               | 30-34     | 0.00221                      | 3851                                                               | 4172                                                          | 1284                                                     |
|               | 35-39     | 0.00245                      | 5440                                                               | 4896                                                          | 2448                                                     |
|               | 40-44     | 0.00312                      | 3906                                                               | 3605                                                          | 3305                                                     |
|               | 45-49     | 0.00332                      | 3298                                                               | 4059                                                          | 2537                                                     |
|               | 50-54     | 0.00537                      | 1258                                                               | 2725                                                          | 2305                                                     |
|               | 55-59     | 0.00707                      | 1655                                                               | 2837                                                          | 709                                                      |
|               | 0-4       | 0.00288                      | 28984                                                              | 6663                                                          | 999                                                      |
|               | 5-9       | 0.00027                      | 35210                                                              | 1381                                                          | 690                                                      |
| Department 54 | 10-14     | 0.00025                      | 38067                                                              | 4568                                                          | 0                                                        |
|               | 15-19     | 0.00112                      | 29404                                                              | 4438                                                          | 1110                                                     |
|               | 20-24     | 0.00208                      | 22689                                                              | 7341                                                          | 1001                                                     |
|               | 25-29     | 0.00221                      | 14864                                                              | 7432                                                          | 2230                                                     |
|               | 30-34     | 0.00286                      | 13747                                                              | 6874                                                          | 3979                                                     |
|               | 35-39     | 0.00251                      | 10611                                                              | 10611                                                         | 3215                                                     |
|               | 40-44     | 0.00310                      | 8230                                                               | 9352                                                          | 2993                                                     |
|               | 45-49     | 0.00390                      | 6180                                                               | 7107                                                          | 3708                                                     |
|               | 50-54     | 0.00619                      | 5111                                                               | 3194                                                          | 3833                                                     |
|               | 55-59     | 0.00799                      | 4392                                                               | 3514                                                          | 1757                                                     |
|               | 0-4       | 0.00252                      | 34053                                                              | 7946                                                          | 2270                                                     |
|               | 5-9       | 0.00024                      | 30115                                                              | 3928                                                          | 1309                                                     |
|               | 10-14     | 0.00022                      | 27818                                                              | 5350                                                          | 2140                                                     |
|               | 15-19     | 0.00079                      | 26374                                                              | 5457                                                          | 2728                                                     |
| 20-24         | 0.00119   | 24681                        | 5845                                                               | 1948                                                          |                                                          |
| 25-29         | 0.00143   | 19875                        | 12067                                                              | 2130                                                          |                                                          |
| 30-34         | 0.00151   | 11012                        | 14071                                                              | 6730                                                          |                                                          |
| 35-39         | 0.00166   | 13809                        | 11926                                                              | 5021                                                          |                                                          |
| 40-44         | 0.00186   | 8829                         | 8277                                                               | 4414                                                          |                                                          |
| 45-49         | 0.00273   | 4694                         | 10561                                                              | 4694                                                          |                                                          |
| 50-54         | 0.00506   | 6707                         | 6148                                                               | 2795                                                          |                                                          |
| 55-59         | 0.00666   | 1479                         | 4438                                                               | 3698                                                          |                                                          |

†Values used in this table are for the urban population

<sup>1</sup> Initial value used in the stock of not-overweight population in 2005 for middle SES.



2 Initial value used in the stock of overweight population in 2005 for middle SES.

3 Initial value used in the stock of obese population in 2005 for middle SES.

**Table 56. Mortality rates and population size by age group at the department level for the higher socioeconomic status population (Oriental region) †**

| Departments   | Age group | Mortality rates (R) (%/year) | Not- overweight population in 2005 (Number of people) <sup>1</sup> | Overweight population in 2005 (Number of people) <sup>2</sup> | Obese population in 2005 (Number of people) <sup>3</sup> |
|---------------|-----------|------------------------------|--------------------------------------------------------------------|---------------------------------------------------------------|----------------------------------------------------------|
| Department 15 | 0-4       | 0.00348                      | 17433                                                              | 3051                                                          | 1307                                                     |
|               | 5-9       | 0.00037                      | 22240                                                              | 5988                                                          | 0                                                        |
|               | 10-14     | 0.00029                      | 30977                                                              | 4425                                                          | 1770                                                     |
|               | 15-19     | 0.00083                      | 27474                                                              | 4848                                                          | 0                                                        |
|               | 20-24     | 0.00120                      | 25800                                                              | 3146                                                          | 629                                                      |
|               | 25-29     | 0.00147                      | 15339                                                              | 5681                                                          | 1704                                                     |
|               | 30-34     | 0.00137                      | 9696                                                               | 7985                                                          | 2852                                                     |
|               | 35-39     | 0.00166                      | 12241                                                              | 9793                                                          | 3672                                                     |
|               | 40-44     | 0.00231                      | 8162                                                               | 9328                                                          | 4664                                                     |
|               | 45-49     | 0.00247                      | 4212                                                               | 10831                                                         | 4814                                                     |
|               | 50-54     | 0.00445                      | 2407                                                               | 12634                                                         | 7821                                                     |
| 55-59         | 0.00649   | 1815                         | 4990                                                               | 4536                                                          |                                                          |
| Department 25 | 0-4       | 0.00328                      | 43839                                                              | 11537                                                         | 4615                                                     |
|               | 5-9       | 0.00020                      | 61341                                                              | 14156                                                         | 11010                                                    |
|               | 10-14     | 0.00031                      | 54734                                                              | 17104                                                         | 5131                                                     |
|               | 15-19     | 0.00068                      | 70839                                                              | 15550                                                         | 1728                                                     |
|               | 20-24     | 0.00119                      | 37352                                                              | 17742                                                         | 2801                                                     |
|               | 25-29     | 0.00124                      | 29368                                                              | 19867                                                         | 6046                                                     |
|               | 30-34     | 0.00131                      | 32420                                                              | 16210                                                         | 8105                                                     |
|               | 35-39     | 0.00136                      | 28530                                                              | 20660                                                         | 14757                                                    |
|               | 40-44     | 0.00157                      | 20118                                                              | 19160                                                         | 22034                                                    |
|               | 45-49     | 0.00250                      | 13664                                                              | 22449                                                         | 13664                                                    |
|               | 50-54     | 0.00391                      | 2967                                                               | 19777                                                         | 12855                                                    |
| 55-59         | 0.00605   | 9349                         | 14803                                                              | 7791                                                          |                                                          |
| Department 50 | 0-4       | 0.00387                      | 14591                                                              | 5571                                                          | 1592                                                     |
|               | 5-9       | 0.00043                      | 23534                                                              | 5883                                                          | 981                                                      |
|               | 10-14     | 0.00045                      | 27123                                                              | 4521                                                          | 1507                                                     |
|               | 15-19     | 0.00087                      | 29102                                                              | 2205                                                          | 882                                                      |
|               | 20-24     | 0.00204                      | 21495                                                              | 5809                                                          | 1452                                                     |
|               | 25-29     | 0.00231                      | 13625                                                              | 7229                                                          | 1390                                                     |
|               | 30-34     | 0.00221                      | 12195                                                              | 9306                                                          | 2567                                                     |
|               | 35-39     | 0.00245                      | 10608                                                              | 9248                                                          | 3264                                                     |
|               | 40-44     | 0.00312                      | 6309                                                               | 8112                                                          | 6910                                                     |
|               | 45-49     | 0.00332                      | 3806                                                               | 7865                                                          | 4820                                                     |
|               | 50-54     | 0.00537                      | 4611                                                               | 5240                                                          | 4192                                                     |
| 55-59         | 0.00707   | 946                          | 4728                                                               | 3783                                                          |                                                          |
| Department 54 | 0-4       | 0.00288                      | 20655                                                              | 8995                                                          | 2665                                                     |
|               | 5-9       | 0.00027                      | 27615                                                              | 4833                                                          | 5523                                                     |
|               | 10-14     | 0.00025                      | 29693                                                              | 3045                                                          | 3045                                                     |

| Departments   | Age group | Mortality rates (R) (%/year) | Not- overweight population in 2005 (Number of people) <sup>1</sup> | Overweight population in 2005 (Number of people) <sup>2</sup> | Obese population in 2005 (Number of people) <sup>3</sup> |
|---------------|-----------|------------------------------|--------------------------------------------------------------------|---------------------------------------------------------------|----------------------------------------------------------|
|               | 15-19     | 0.00112                      | 28849                                                              | 4993                                                          | 1110                                                     |
|               | 20-24     | 0.00208                      | 27360                                                              | 8675                                                          | 2669                                                     |
|               | 25-29     | 0.00221                      | 18951                                                              | 10405                                                         | 4088                                                     |
|               | 30-34     | 0.00286                      | 12300                                                              | 11215                                                         | 4341                                                     |
|               | 35-39     | 0.00251                      | 11576                                                              | 11897                                                         | 4180                                                     |
|               | 40-44     | 0.00310                      | 11597                                                              | 8978                                                          | 4115                                                     |
|               | 45-49     | 0.00390                      | 5562                                                               | 14522                                                         | 5871                                                     |
|               | 50-54     | 0.00619                      | 6069                                                               | 9902                                                          | 5430                                                     |
|               | 55-59     | 0.00799                      | 4392                                                               | 4099                                                          | 4685                                                     |
| Department 68 | 0-4       | 0.00252                      | 43702                                                              | 12486                                                         | 3405                                                     |
|               | 5-9       | 0.00024                      | 57611                                                              | 14403                                                         | 3928                                                     |
|               | 10-14     | 0.00022                      | 62055                                                              | 17119                                                         | 6420                                                     |
|               | 15-19     | 0.00079                      | 69118                                                              | 6366                                                          | 1819                                                     |
|               | 20-24     | 0.00119                      | 61702                                                              | 15588                                                         | 2598                                                     |
|               | 25-29     | 0.00143                      | 41880                                                              | 23425                                                         | 5679                                                     |
|               | 30-34     | 0.00151                      | 30589                                                              | 20189                                                         | 9789                                                     |
|               | 35-39     | 0.00166                      | 28873                                                              | 21969                                                         | 12554                                                    |
|               | 40-44     | 0.00186                      | 21521                                                              | 34764                                                         | 9933                                                     |
|               | 45-49     | 0.00273                      | 18189                                                              | 24057                                                         | 13495                                                    |
|               | 50-54     | 0.00506                      | 11178                                                              | 21238                                                         | 6707                                                     |
| 55-59         | 0.00666   | 8876                         | 19231                                                              | 8876                                                          |                                                          |

<sup>1</sup>Values used in this table are for the urban population

<sup>2</sup>Initial value used in the stock of not-overweight population in 2005 for higher SES.

<sup>3</sup>Initial value used in the stock of overweight population in 2005 for higher SES.

<sup>3</sup>Initial value used in the stock of obese population in 2005 for higher SES.

## 1.3 Central region

The Central region of Colombia is located in the central area of the national territory and consists of seven departments, these are:

- Antioquia (5)
- Caldas (17)
- Caquetá (18)
- Huila (41)
- Quindío (63)
- Risaralda (66)
- Tolima (73)

### 1.3.1 Data and model parameters used

**Table 57. Prevalent rates of entire population by age group, gender, and body mass index category in 2005 (Central region)**

| Age Group | Nutritional State | Nutritional State |
|-----------|-------------------|-------------------|
|-----------|-------------------|-------------------|

|       | Male          |           |         | Female        |           |         |
|-------|---------------|-----------|---------|---------------|-----------|---------|
|       | Not-Overweigh | Overweigh | Obese   | Not-Overweigh | Overweigh | Obese   |
| 0-4   | 0.76770       | 0.16770   | 0.06460 | 0.78267       | 0.16933   | 0.04800 |
| 5-9   | 0.81472       | 0.13198   | 0.05330 | 0.82339       | 0.14081   | 0.03580 |
| 10-14 | 0.82791       | 0.13488   | 0.03721 | 0.82725       | 0.12652   | 0.04623 |
| 15-19 | 0.90638       | 0.07447   | 0.01915 | 0.83814       | 0.13301   | 0.02885 |
| 20-24 | 0.80000       | 0.14959   | 0.05041 | 0.77162       | 0.17295   | 0.05543 |
| 25-29 | 0.67008       | 0.26844   | 0.06148 | 0.66667       | 0.24151   | 0.09182 |
| 30-34 | 0.51111       | 0.38519   | 0.10370 | 0.55686       | 0.31895   | 0.12418 |
| 35-39 | 0.48931       | 0.39430   | 0.11639 | 0.47821       | 0.35714   | 0.16465 |
| 40-44 | 0.46599       | 0.42569   | 0.10831 | 0.44226       | 0.36745   | 0.19029 |
| 45-49 | 0.46226       | 0.42689   | 0.11085 | 0.33725       | 0.40000   | 0.26275 |
| 50-54 | 0.44126       | 0.44986   | 0.10888 | 0.28033       | 0.41967   | 0.30000 |
| 55-59 | 0.41603       | 0.41221   | 0.17176 | 0.29211       | 0.42431   | 0.28358 |

**Table 58. Prevalent rates of lower socioeconomic status population by age group, gender, and body mass index category in 2005 (Central region)**

| Age Group | Nutritional State Male |           |         | Nutritional State Female |           |         |
|-----------|------------------------|-----------|---------|--------------------------|-----------|---------|
|           | Not-Overweigh          | Overweigh | Obese   | Not-Overweigh            | Overweigh | Obese   |
| 0-4       | 0.78008                | 0.17012   | 0.04979 | 0.84038                  | 0.13615   | 0.02347 |
| 5-9       | 0.84211                | 0.13158   | 0.02632 | 0.85882                  | 0.12941   | 0.01176 |
| 10-14     | 0.87640                | 0.11236   | 0.01124 | 0.87000                  | 0.10000   | 0.03000 |
| 15-19     | 0.94681                | 0.05319   | 0.00000 | 0.81395                  | 0.17829   | 0.00775 |
| 20-24     | 0.87736                | 0.06604   | 0.05660 | 0.77326                  | 0.16279   | 0.06395 |
| 25-29     | 0.75510                | 0.22449   | 0.02041 | 0.64706                  | 0.22794   | 0.12500 |
| 30-34     | 0.63636                | 0.27273   | 0.09091 | 0.51724                  | 0.39310   | 0.08966 |
| 35-39     | 0.71212                | 0.21212   | 0.07576 | 0.38235                  | 0.41176   | 0.20588 |
| 40-44     | 0.66667                | 0.26667   | 0.06667 | 0.36538                  | 0.33654   | 0.29808 |
| 45-49     | 0.56757                | 0.39189   | 0.04054 | 0.41489                  | 0.43617   | 0.14894 |
| 50-54     | 0.58209                | 0.40299   | 0.01493 | 0.41053                  | 0.34737   | 0.24211 |
| 55-59     | 0.58182                | 0.30909   | 0.10909 | 0.43548                  | 0.29032   | 0.27419 |

**Table 59. Prevalent rates of middle socioeconomic status population by age group, gender, and body mass index category in 2005 (Central region)**

| Age Group | Nutritional State Male |           |         | Nutritional State Female |           |         |
|-----------|------------------------|-----------|---------|--------------------------|-----------|---------|
|           | Not-Overweigh          | Overweigh | Obese   | Not-Overweigh            | Overweigh | Obese   |
| 0-4       | 0.77273                | 0.15909   | 0.06818 | 0.75104                  | 0.18257   | 0.06639 |
| 5-9       | 0.82963                | 0.11852   | 0.05185 | 0.84071                  | 0.10619   | 0.05310 |
| 10-14     | 0.84932                | 0.11644   | 0.03425 | 0.84000                  | 0.12800   | 0.03200 |
| 15-19     | 0.88636                | 0.09091   | 0.02273 | 0.87135                  | 0.09942   | 0.02924 |
| 20-24     | 0.86628                | 0.08140   | 0.05233 | 0.75290                  | 0.18147   | 0.06564 |
| 25-29     | 0.72180                | 0.21053   | 0.06767 | 0.62931                  | 0.26293   | 0.10776 |
| 30-34     | 0.57480                | 0.34646   | 0.07874 | 0.46117                  | 0.36893   | 0.16990 |
| 35-39     | 0.49600                | 0.40800   | 0.09600 | 0.46875                  | 0.34375   | 0.18750 |
| 40-44     | 0.51754                | 0.40351   | 0.07895 | 0.38378                  | 0.41081   | 0.20541 |
| 45-49     | 0.53571                | 0.33929   | 0.12500 | 0.28037                  | 0.46729   | 0.25234 |
| 50-54     | 0.52564                | 0.39744   | 0.07692 | 0.24823                  | 0.38298   | 0.36879 |
| 55-59     | 0.47273                | 0.40000   | 0.12727 | 0.29293                  | 0.42424   | 0.28283 |

**Table 60. Prevalent rates of higher socioeconomic status population by age group, gender, and body mass index category in 2005 (Central region)**

| Age Group | Nutritional State Male |             |             | Nutritional State Female |            |            |
|-----------|------------------------|-------------|-------------|--------------------------|------------|------------|
|           | Not-Overweigh          | Overweigh   | Obese       | Not-Overweigh            | Overweigh  | Obese      |
| 0-4       | 0,753333333            | 0,173333333 | 0,073333333 | 0,76689189               | 0,18243243 | 0,05067568 |
| 5-9       | 0,792349727            | 0,142076503 | 0,065573770 | 0,80090498               | 0,16289593 | 0,0361991  |
| 10-14     | 0,789743590            | 0,158974359 | 0,051282051 | 0,79569892               | 0,13978495 | 0,06451613 |
| 15-19     | 0,901639344            | 0,073770492 | 0,024590164 | 0,83024691               | 0,13271605 | 0,03703704 |
| 20-24     | 0,741839763            | 0,210682493 | 0,047477745 | 0,78131635               | 0,17197452 | 0,04670913 |
| 25-29     | 0,610894942            | 0,315175097 | 0,073929961 | 0,69320843               | 0,23419204 | 0,07259953 |
| 30-34     | 0,433962264            | 0,443396226 | 0,122641509 | 0,61835749               | 0,26811594 | 0,11352657 |
| 35-39     | 0,421739130            | 0,439130435 | 0,139130435 | 0,51072961               | 0,34763948 | 0,1416309  |
| 40-44     | 0,385650224            | 0,479820628 | 0,134529148 | 0,4820296                | 0,35729387 | 0,16067653 |
| 45-49     | 0,394957983            | 0,478991597 | 0,126050420 | 0,34792123               | 0,36105033 | 0,29102845 |
| 50-54     | 0,362745098            | 0,485294118 | 0,151960784 | 0,25935829               | 0,45187166 | 0,28877005 |
| 55-59     | 0,335526316            | 0,453947368 | 0,210526316 | 0,26298701               | 0,4512987  | 0,28571429 |

**Table 61. Prevalent rates of entire population by age group, gender, and body mass index category in 2010 (Central region)**

| Age Group | Nutritional State Male |           |         | Nutritional State Female |           |         |
|-----------|------------------------|-----------|---------|--------------------------|-----------|---------|
|           | Not-Overweigh          | Overweigh | Obese   | Not-Overweigh            | Overweigh | Obese   |
| 0-4       | 0.75646                | 0.20204   | 0.04150 | 0.74368                  | 0.20573   | 0.05059 |
| 5-9       | 0.74457                | 0.15421   | 0.10122 | 0.78224                  | 0.15574   | 0.06202 |
| 10-14     | 0.77203                | 0.15971   | 0.06826 | 0.80088                  | 0.16206   | 0.03706 |
| 15-19     | 0.86534                | 0.10670   | 0.02796 | 0.80834                  | 0.14375   | 0.04792 |
| 20-24     | 0.75588                | 0.19216   | 0.05196 | 0.70886                  | 0.21296   | 0.07818 |
| 25-29     | 0.56257                | 0.33333   | 0.10410 | 0.57454                  | 0.29481   | 0.13065 |
| 30-34     | 0.44140                | 0.40274   | 0.15586 | 0.48689                  | 0.34003   | 0.17308 |
| 35-39     | 0.41395                | 0.43323   | 0.15282 | 0.40151                  | 0.39114   | 0.20735 |
| 40-44     | 0.41495                | 0.43428   | 0.15077 | 0.35678                  | 0.39365   | 0.24957 |
| 45-49     | 0.37926                | 0.44611   | 0.17462 | 0.32857                  | 0.42411   | 0.24732 |
| 50-54     | 0.36364                | 0.48963   | 0.14673 | 0.26022                  | 0.40799   | 0.33178 |
| 55-59     | 0.42214                | 0.43902   | 0.13884 | 0.26460                  | 0.38261   | 0.35280 |

**Table 62. Prevalent rates of lower socioeconomic status population by age group, gender, and body mass index category in 2010 (Central region)**

| Age Group | Nutritional State Male |           |         | Nutritional State Female |           |         |
|-----------|------------------------|-----------|---------|--------------------------|-----------|---------|
|           | Not-Overweigh          | Overweigh | Obese   | Not-Overweigh            | Overweigh | Obese   |
| 0-4       | 0.77744                | 0.18598   | 0.03659 | 0.74390                  | 0.20122   | 0.05488 |
| 5-9       | 0.82245                | 0.12010   | 0.05744 | 0.87216                  | 0.10227   | 0.02557 |
| 10-14     | 0.86006                | 0.10787   | 0.03207 | 0.86216                  | 0.10270   | 0.03514 |
| 15-19     | 0.87956                | 0.10219   | 0.01825 | 0.79630                  | 0.15432   | 0.04938 |
| 20-24     | 0.80000                | 0.13846   | 0.06154 | 0.72951                  | 0.18443   | 0.08607 |
| 25-29     | 0.65625                | 0.24375   | 0.10000 | 0.60699                  | 0.25764   | 0.13537 |
| 30-34     | 0.60843                | 0.28313   | 0.10843 | 0.40094                  | 0.36792   | 0.23113 |

|       |         |         |         |         |         |         |
|-------|---------|---------|---------|---------|---------|---------|
| 35-39 | 0.52174 | 0.36522 | 0.11304 | 0.37436 | 0.37436 | 0.25128 |
| 40-44 | 0.59016 | 0.33607 | 0.07377 | 0.29825 | 0.39766 | 0.30409 |
| 45-49 | 0.47826 | 0.38261 | 0.13913 | 0.36000 | 0.36000 | 0.28000 |
| 50-54 | 0.48598 | 0.41121 | 0.10280 | 0.25342 | 0.39726 | 0.34932 |
| 55-59 | 0.60000 | 0.35789 | 0.04211 | 0.74390 | 0.20122 | 0.05488 |

**Table 63. Prevalent rates of middle socioeconomic status population by age group, gender, and body mass index category in 2010 (Central region)**

| Age Group | Nutritional State Male |           |         | Nutritional State Female |           |         |
|-----------|------------------------|-----------|---------|--------------------------|-----------|---------|
|           | Not-Overweigh          | Overweigh | Obese   | Not-Overweigh            | Overweigh | Obese   |
| 0-4       | 0.75159                | 0.21444   | 0.03397 | 0.74641                  | 0.22249   | 0.03110 |
| 5-9       | 0.73814                | 0.16495   | 0.09691 | 0.79183                  | 0.14008   | 0.06809 |
| 10-14     | 0.78053                | 0.15076   | 0.06870 | 0.79779                  | 0.16544   | 0.03676 |
| 15-19     | 0.86019                | 0.10427   | 0.03555 | 0.82286                  | 0.13905   | 0.03810 |
| 20-24     | 0.78917                | 0.17379   | 0.03704 | 0.69167                  | 0.20833   | 0.10000 |
| 25-29     | 0.56610                | 0.34237   | 0.09153 | 0.55206                  | 0.27603   | 0.17191 |
| 30-34     | 0.42254                | 0.41549   | 0.16197 | 0.45902                  | 0.35792   | 0.18306 |
| 35-39     | 0.47210                | 0.42489   | 0.10300 | 0.36857                  | 0.40000   | 0.23143 |
| 40-44     | 0.37021                | 0.46383   | 0.16596 | 0.35150                  | 0.34877   | 0.29973 |
| 45-49     | 0.42678                | 0.43933   | 0.13389 | 0.30699                  | 0.41337   | 0.27964 |
| 50-54     | 0.39785                | 0.47312   | 0.12903 | 0.24847                  | 0.42025   | 0.33129 |
| 55-59     | 0.40506                | 0.42405   | 0.17089 | 0.27103                  | 0.35981   | 0.36916 |

**Table 64. Prevalent rates of higher socioeconomic status population by age group, gender, and body mass index category in 2010 (Central region)**

| Age Group | Nutritional State Male |           |         | Nutritional State Female |           |         |
|-----------|------------------------|-----------|---------|--------------------------|-----------|---------|
|           | Not-Overweigh          | Overweigh | Obese   | Not-Overweigh            | Overweigh | Obese   |
| 0-4       | 0.74686                | 0.20084   | 0.05230 | 0.74091                  | 0.19318   | 0.06591 |
| 5-9       | 0.70033                | 0.16722   | 0.13245 | 0.71609                  | 0.20434   | 0.07957 |
| 10-14     | 0.71807                | 0.19470   | 0.08723 | 0.76991                  | 0.19174   | 0.03835 |
| 15-19     | 0.86275                | 0.11011   | 0.02715 | 0.80343                  | 0.14248   | 0.05409 |
| 20-24     | 0.71308                | 0.22785   | 0.05907 | 0.71405                  | 0.22779   | 0.05816 |
| 25-29     | 0.52679                | 0.35938   | 0.11384 | 0.57790                  | 0.32428   | 0.09783 |
| 30-34     | 0.37784                | 0.44886   | 0.17330 | 0.53710                  | 0.31802   | 0.14488 |
| 35-39     | 0.33436                | 0.46319   | 0.20245 | 0.43411                  | 0.39147   | 0.17442 |
| 40-44     | 0.38902                | 0.44630   | 0.16468 | 0.37580                  | 0.41879   | 0.20541 |
| 45-49     | 0.31926                | 0.46966   | 0.21108 | 0.33229                  | 0.44462   | 0.22309 |
| 50-54     | 0.30539                | 0.52395   | 0.17066 | 0.26821                  | 0.40397   | 0.32781 |
| 55-59     | 0.37143                | 0.47500   | 0.15357 | 0.26122                  | 0.40000   | 0.33878 |

**Table 65 Fraction of births for men by body mass index category, gender, and socioeconomic status (Central region) †**

| Population group | Lower SES (%/year) | Middle SES (%/year) | Higher SES (%/year) | Complete Urban Population (%/year) |
|------------------|--------------------|---------------------|---------------------|------------------------------------|
| Not- overweight  | 85,48%             | 78,00%              | 85,51%              | 83,43%                             |
| Overweight       | 11,29%             | 12,00%              | 11,59%              | 11,60%                             |
| Obese            | 3,23%              | 10,00%              | 2,90%               | 4,97%                              |

† The fractions of births by each BMI category correspond to the prevalences by BMI category of children aged 0 to 12 months

**Table 66. Fraction of births for women by body mass index category and socioeconomic status (Central region) †**

| Population group | Lower SES (%/year) | Middle SES (%/year) | Higher SES (%/year) | Complete Urban Population (%/year) |
|------------------|--------------------|---------------------|---------------------|------------------------------------|
| Not- overweight  | 79,41%             | 82,22%              | 76,79%              | 79,26%                             |
| Overweight       | 17,65%             | 15,56%              | 19,64%              | 17,78%                             |
| Obese            | 2,94%              | 2,22%               | 3,57%               | 2,96%                              |

† The fractions of births by each BMI category correspond to the prevalences by BMI category of children aged 0 to 12 months

**Table 67. Mortality rates for men and population size by age group without segregate by socioeconomic status (Central region) †**

| Age group | Mortality rates (R) (%/year) | Not- overweight men in 2005 (Number of people) <sup>1</sup> | Overweight men in 2005 (Number of people) <sup>2</sup> | Obese men in 2005 (Number of people) <sup>3</sup> |
|-----------|------------------------------|-------------------------------------------------------------|--------------------------------------------------------|---------------------------------------------------|
| 0-4       | 0.00324                      | 273833                                                      | 59818                                                  | 23041                                             |
| 5-9       | 0.00036                      | 306621                                                      | 49671                                                  | 20059                                             |
| 10-14     | 0.00034                      | 328460                                                      | 53513                                                  | 14762                                             |
| 15-19     | 0.00167                      | 340495                                                      | 27975                                                  | 7194                                              |
| 20-24     | 0.00341                      | 257326                                                      | 48118                                                  | 16214                                             |
| 25-29     | 0.00337                      | 193447                                                      | 77497                                                  | 17747                                             |
| 30-34     | 0.00323                      | 130546                                                      | 98382                                                  | 26488                                             |
| 35-39     | 0.00309                      | 131476                                                      | 105947                                                 | 31273                                             |
| 40-44     | 0.00336                      | 122631                                                      | 112025                                                 | 28503                                             |
| 45-49     | 0.00443                      | 102487                                                      | 94643                                                  | 24576                                             |
| 50-54     | 0.00641                      | 79070                                                       | 80611                                                  | 19511                                             |
| 55-59     | 0.00895                      | 56890                                                       | 56368                                                  | 23487                                             |

† Values used in this table are for the urban population

<sup>1</sup> Initial value used in the stock of not-overweight population in 2005.

<sup>2</sup> Initial value used in the stock of overweight population in 2005.

<sup>3</sup> Initial value used in the stock of obese population in 2005.

**Table 68. Mortality rates for women and population size by age group without segregate by socioeconomic status (Central region) †**

| Age group | Mortality rates (R) (%/year) Female | Not- overweight women in 2005 (Number of people) <sup>1</sup> | Overweight women in 2005 (Number of people) <sup>2</sup> | Obese women in 2005 (Number of people) <sup>3</sup> |
|-----------|-------------------------------------|---------------------------------------------------------------|----------------------------------------------------------|-----------------------------------------------------|
| 0-4       | 0.00261                             | 268792                                                        | 58154                                                    | 16485                                               |
| 5-9       | 0.00024                             | 299977                                                        | 51300                                                    | 13042                                               |
| 10-14     | 0.00023                             | 319572                                                        | 48876                                                    | 17858                                               |
| 15-19     | 0.00047                             | 320020                                                        | 50787                                                    | 11014                                               |
| 20-24     | 0.00067                             | 267929                                                        | 60053                                                    | 19248                                               |
| 25-29     | 0.00058                             | 211777                                                        | 76719                                                    | 29169                                               |
| 30-34     | 0.00087                             | 161027                                                        | 92232                                                    | 35910                                               |

|       |         |        |        |       |
|-------|---------|--------|--------|-------|
| 35-39 | 0.00113 | 148473 | 110885 | 51120 |
| 40-44 | 0.00148 | 134466 | 111722 | 57856 |
| 45-49 | 0.00232 | 87754  | 104080 | 68366 |
| 50-54 | 0.00343 | 58805  | 88035  | 62932 |
| 55-59 | 0.00585 | 47432  | 68897  | 46047 |

†Values used in this table are for the urban population

<sup>1</sup> Initial value used in the stock of not-overweight population in 2005.

<sup>2</sup> Initial value used in the stock of overweight population in 2005.

<sup>3</sup> Initial value used in the stock of obese population in 2005.

**Table 69. Man mortality rates and population size by age group for the lower socioeconomic status population (Central region) †**

| Age group | Mortality rates (R) (%/year) | Not- overweight men in 2005 (Number of people) <sup>1</sup> | Overweight men in 2005 (Number of people) <sup>2</sup> | Obese men in 2005 (Number of people) <sup>3</sup> |
|-----------|------------------------------|-------------------------------------------------------------|--------------------------------------------------------|---------------------------------------------------|
| 0-4       | 0.00324                      | 83302                                                       | 18167                                                  | 5317                                              |
| 5-9       | 0.00036                      | 61133                                                       | 9552                                                   | 1910                                              |
| 10-14     | 0.00034                      | 71966                                                       | 9226                                                   | 923                                               |
| 15-19     | 0.00167                      | 71136                                                       | 3996                                                   | 0                                                 |
| 20-24     | 0.00341                      | 48641                                                       | 3661                                                   | 3138                                              |
| 25-29     | 0.00337                      | 43777                                                       | 13015                                                  | 1183                                              |
| 30-34     | 0.00323                      | 26488                                                       | 11352                                                  | 3784                                              |
| 35-39     | 0.00309                      | 29997                                                       | 8935                                                   | 3191                                              |
| 40-44     | 0.00336                      | 26515                                                       | 10606                                                  | 2651                                              |
| 45-49     | 0.00443                      | 21961                                                       | 15164                                                  | 1569                                              |
| 50-54     | 0.00641                      | 20024                                                       | 13863                                                  | 513                                               |
| 55-59     | 0.00895                      | 16702                                                       | 8873                                                   | 3132                                              |

†Values used in this table are for the urban population

<sup>1</sup> Initial value used in the stock of not-overweight population in 2005 for lower SES.

<sup>2</sup> Initial value used in the stock of overweight population in 2005 for lower SES.

<sup>3</sup> Initial value used in the stock of obese population in 2005 for lower SES.

**Table 70. Women mortality rates and population size by age group for the lower socioeconomic status population (Central region) †**

| Age group | Mortality rates (R) (%/year) | Not- overweight women in 2005 (Number of people) <sup>1</sup> | Overweight women in 2005 (Number of people) <sup>2</sup> | Obese women in 2005 (Number of people) <sup>3</sup> |
|-----------|------------------------------|---------------------------------------------------------------|----------------------------------------------------------|-----------------------------------------------------|
| 0-4       | 0.00261                      | 86404                                                         | 13998                                                    | 2414                                                |
| 5-9       | 0.00024                      | 60354                                                         | 9094                                                     | 827                                                 |
| 10-14     | 0.00023                      | 69562                                                         | 7996                                                     | 2399                                                |
| 15-19     | 0.00047                      | 62157                                                         | 13615                                                    | 592                                                 |
| 20-24     | 0.00067                      | 46278                                                         | 9743                                                     | 3827                                                |
| 25-29     | 0.00058                      | 41278                                                         | 14541                                                    | 7974                                                |
| 30-34     | 0.00087                      | 24374                                                         | 18525                                                    | 4225                                                |
| 35-39     | 0.00113                      | 18610                                                         | 20042                                                    | 10021                                               |
| 40-44     | 0.00148                      | 16790                                                         | 15464                                                    | 13697                                               |
| 45-49     | 0.00232                      | 18841                                                         | 19807                                                    | 6764                                                |
| 50-54     | 0.00343                      | 16532                                                         | 13989                                                    | 9750                                                |
| 55-59     | 0.00585                      | 14844                                                         | 9896                                                     | 9346                                                |

†Values used in this table are for the urban population

<sup>1</sup> Initial value used in the stock of not-overweight population in 2005 for lower SES.

<sup>2</sup> Initial value used in the stock of overweight population in 2005 for lower SES.

<sup>3</sup> Initial value used in the stock of obese population in 2005 for lower SES.

**Table 71. Man mortality rates and population size by age group for the middle socioeconomic status population (Central region) †**

| Age group | Mortality rates (R) (%/year) | Not- overweight men in 2005 (Number of people) <sup>1</sup> | Overweight men in 2005 (Number of people) <sup>2</sup> | Obese men in 2005 (Number of people) <sup>3</sup> |
|-----------|------------------------------|-------------------------------------------------------------|--------------------------------------------------------|---------------------------------------------------|
| 0-4       | 0.00324                      | 90392                                                       | 18610                                                  | 7976                                              |
| 5-9       | 0.00036                      | 106983                                                      | 15283                                                  | 6686                                              |
| 10-14     | 0.00034                      | 114407                                                      | 15685                                                  | 4613                                              |
| 15-19     | 0.00167                      | 93516                                                       | 9591                                                   | 2398                                              |
| 20-24     | 0.00341                      | 77930                                                       | 7322                                                   | 4707                                              |
| 25-29     | 0.00337                      | 56792                                                       | 16564                                                  | 5324                                              |
| 30-34     | 0.00323                      | 46038                                                       | 27749                                                  | 6307                                              |
| 35-39     | 0.00309                      | 39570                                                       | 32550                                                  | 7659                                              |
| 40-44     | 0.00336                      | 39109                                                       | 30492                                                  | 5966                                              |
| 45-49     | 0.00443                      | 31373                                                       | 19870                                                  | 7320                                              |
| 50-54     | 0.00641                      | 21051                                                       | 15917                                                  | 3081                                              |
| 55-59     | 0.00895                      | 13570                                                       | 11482                                                  | 3653                                              |

†Values used in this table are for the urban population

1 Initial value used in the stock of not-overweight population in 2005 for middle SES.

2 Initial value used in the stock of overweight population in 2005 for middle SES.

3 Initial value used in the stock of obese population in 2005 for middle SES.

**Table 72. Women mortality rates and population size by age group for the middle socioeconomic status population (Central region) †**

| Age group | Mortality rates (R) (%/year) | Not- overweight women in 2005 (Number of people) <sup>1</sup> | Overweight women in 2005 (Number of people) <sup>2</sup> | Obese women in 2005 (Number of people) <sup>3</sup> |
|-----------|------------------------------|---------------------------------------------------------------|----------------------------------------------------------|-----------------------------------------------------|
| 0-4       | 0.00261                      | 84588                                                         | 20563                                                    | 7477                                                |
| 5-9       | 0.00024                      | 104946                                                        | 13256                                                    | 6628                                                |
| 10-14     | 0.00023                      | 110178                                                        | 16789                                                    | 4197                                                |
| 15-19     | 0.00047                      | 93439                                                         | 10661                                                    | 3136                                                |
| 20-24     | 0.00067                      | 73115                                                         | 17623                                                    | 6374                                                |
| 25-29     | 0.00058                      | 54484                                                         | 22764                                                    | 9329                                                |
| 30-34     | 0.00087                      | 41817                                                         | 33454                                                    | 15406                                               |
| 35-39     | 0.00113                      | 43211                                                         | 31688                                                    | 17285                                               |
| 40-44     | 0.00148                      | 33507                                                         | 35867                                                    | 17933                                               |
| 45-49     | 0.00232                      | 19271                                                         | 32118                                                    | 17344                                               |
| 50-54     | 0.00343                      | 11638                                                         | 17955                                                    | 17290                                               |
| 55-59     | 0.00585                      | 9985                                                          | 14461                                                    | 9641                                                |

†Values used in this table are for the urban population

1 Initial value used in the stock of not-overweight population in 2005 for middle SES.

2 Initial value used in the stock of overweight population in 2005 for middle SES.

3 Initial value used in the stock of obese population in 2005 for middle SES.

**Table 73. Man mortality rates and population size by age group for the higher socioeconomic status population (Central region) †**

| Age group | Mortality rates (R) (%/year) | Not- overweight men in 2005 (Number of people) <sup>1</sup> | Overweight men in 2005 (Number of people) <sup>2</sup> | Obese men in 2005 (Number of people) <sup>3</sup> |
|-----------|------------------------------|-------------------------------------------------------------|--------------------------------------------------------|---------------------------------------------------|
| 0-4       | 0.00324                      | 100140                                                      | 23041                                                  | 9748                                              |
| 5-9       | 0.00036                      | 138505                                                      | 24835                                                  | 11462                                             |
| 10-14     | 0.00034                      | 142086                                                      | 28602                                                  | 9226                                              |
| 15-19     | 0.00167                      | 175843                                                      | 14387                                                  | 4796                                              |
| 20-24     | 0.00341                      | 130755                                                      | 37135                                                  | 8368                                              |
| 25-29     | 0.00337                      | 92878                                                       | 47918                                                  | 11240                                             |
| 30-34     | 0.00323                      | 58020                                                       | 59282                                                  | 16397                                             |
| 35-39     | 0.00309                      | 61909                                                       | 64462                                                  | 20423                                             |



|       |         |       |       |       |
|-------|---------|-------|-------|-------|
| 40-44 | 0.00336 | 57007 | 70927 | 19886 |
| 45-49 | 0.00443 | 49152 | 59610 | 15687 |
| 50-54 | 0.00641 | 37995 | 50831 | 15917 |
| 55-59 | 0.00895 | 26618 | 36013 | 16702 |

†Values used in this table are for the urban population

<sup>1</sup> Initial value used in the stock of not-overweight population in 2005 for higher SES.

<sup>2</sup> Initial value used in the stock of overweight population in 2005 for higher SES.

<sup>3</sup> Initial value used in the stock of obese population in 2005 for higher SES.

**Table 74. Women mortality rates and population size by age group for the higher socioeconomic status population (Central region) †**

| Age group | Mortality rates (R) (%/year) | Not- overweight women in 2005 (Number of people) <sup>1</sup> | Overweight women in 2005 (Number of people) <sup>2</sup> | Obese women in 2005 (Number of people) <sup>3</sup> |
|-----------|------------------------------|---------------------------------------------------------------|----------------------------------------------------------|-----------------------------------------------------|
| 0-4       | 0.00261                      | 98152                                                         | 23349                                                    | 6486                                                |
| 5-9       | 0.00024                      | 135525                                                        | 27564                                                    | 6125                                                |
| 10-14     | 0.00023                      | 139395                                                        | 24488                                                    | 11302                                               |
| 15-19     | 0.00047                      | 164573                                                        | 26307                                                    | 7342                                                |
| 20-24     | 0.00067                      | 148662                                                        | 32722                                                    | 8887                                                |
| 25-29     | 0.00058                      | 115971                                                        | 39179                                                    | 12146                                               |
| 30-34     | 0.00087                      | 93599                                                         | 40584                                                    | 17184                                               |
| 35-39     | 0.00113                      | 86630                                                         | 58966                                                    | 24023                                               |
| 40-44     | 0.00148                      | 82324                                                         | 61021                                                    | 27441                                               |
| 45-49     | 0.00232                      | 50816                                                         | 52733                                                    | 42506                                               |
| 50-54     | 0.00343                      | 31802                                                         | 55407                                                    | 35408                                               |
| 55-59     | 0.00585                      | 24774                                                         | 42514                                                    | 26915                                               |

†Values used in this table are for the urban population

<sup>1</sup> Initial value used in the stock of not-overweight population in 2005 for higher SES.

<sup>2</sup> Initial value used in the stock of overweight population in 2005 for higher SES.

<sup>3</sup> Initial value used in the stock of obese population in 2005 for higher SES.

**Table 75. Data and projections of the Fertility rates by department and Region (Central region) †**

| Year | Fecundity Rate Depto 05 | Fecundity Rate Depto 17 | Fecundity Rate Depto 18 | Fecundity Rate Depto 41 | Fecundity Rate Depto 63 | Fecundity Rate Depto 66 | Fecundity Rate Depto 73 | Average Fecundity Rate |
|------|-------------------------|-------------------------|-------------------------|-------------------------|-------------------------|-------------------------|-------------------------|------------------------|
| 2005 | 2,2791                  | 2,3096                  | 3,5656                  | 3,048                   | 2,2861                  | 2,2055                  | 2,7673                  | 2,637                  |
| 2006 | 2,2484                  | 2,2824                  | 3,5004                  | 2,9805                  | 2,2624                  | 2,182                   | 2,7292                  | 2,598                  |
| 2007 | 2,2177                  | 2,2552                  | 3,4352                  | 2,913                   | 2,2387                  | 2,1585                  | 2,6911                  | 2,558                  |
| 2008 | 2,187                   | 2,228                   | 3,37                    | 2,8455                  | 2,215                   | 2,135                   | 2,653                   | 2,519                  |
| 2009 | 2,1731                  | 2,2103                  | 3,3165                  | 2,8008                  | 2,2021                  | 2,125                   | 2,6222                  | 2,493                  |
| 2010 | 2,1592                  | 2,1926                  | 3,263                   | 2,7561                  | 2,1892                  | 2,115                   | 2,5914                  | 2,467                  |
| 2011 | 2,1453                  | 2,1749                  | 3,2095                  | 2,7114                  | 2,1763                  | 2,105                   | 2,5606                  | 2,440                  |
| 2012 | 2,1314                  | 2,1572                  | 3,156                   | 2,6667                  | 2,1634                  | 2,095                   | 2,5298                  | 2,414                  |
| 2013 | 2,1175                  | 2,1395                  | 3,1025                  | 2,622                   | 2,1505                  | 2,085                   | 2,499                   | 2,388                  |
| 2014 | 2,1117                  | 2,13                    | 3,0638                  | 2,5956                  | 2,1439                  | 2,0809                  | 2,478                   | 2,372                  |
| 2015 | 2,1059                  | 2,1205                  | 3,0251                  | 2,5692                  | 2,1373                  | 2,0768                  | 2,457                   | 2,356                  |
| 2016 | 2,1001                  | 2,111                   | 2,9864                  | 2,5428                  | 2,1307                  | 2,0727                  | 2,436                   | 2,340                  |
| 2017 | 2,0943                  | 2,1015                  | 2,9477                  | 2,5164                  | 2,1241                  | 2,0686                  | 2,415                   | 2,324                  |
| 2018 | 2,0885                  | 2,092                   | 2,909                   | 2,49                    | 2,1175                  | 2,0645                  | 2,394                   | 2,308                  |

| Year | Fecundity Rate Depto 05 | Fecundity Rate Depto 17 | Fecundity Rate Depto 18 | Fecundity Rate Depto 41 | Fecundity Rate Depto 63 | Fecundity Rate Depto 66 | Fecundity Rate Depto 73 | Average Fecundity Rate |
|------|-------------------------|-------------------------|-------------------------|-------------------------|-------------------------|-------------------------|-------------------------|------------------------|
| 2019 | 2,0827                  | 2,0825                  | 2,8703                  | 2,4636                  | 2,1109                  | 2,0604                  | 2,373                   | 2,292                  |
| 2020 | 2,0769                  | 2,073                   | 2,8316                  | 2,4372                  | 2,1043                  | 2,0563                  | 2,352                   | 2,276                  |
| 2021 | 2,0711                  | 2,0635                  | 2,7929                  | 2,4108                  | 2,0977                  | 2,0522                  | 2,331                   | 2,260                  |
| 2022 | 2,0653                  | 2,054                   | 2,7542                  | 2,3844                  | 2,0911                  | 2,0481                  | 2,31                    | 2,244                  |
| 2023 | 2,0595                  | 2,0445                  | 2,7155                  | 2,358                   | 2,0845                  | 2,044                   | 2,289                   | 2,228                  |
| 2024 | 2,0537                  | 2,035                   | 2,6768                  | 2,3316                  | 2,0779                  | 2,0399                  | 2,268                   | 2,212                  |
| 2025 | 2,0479                  | 2,0255                  | 2,6381                  | 2,3052                  | 2,0713                  | 2,0358                  | 2,247                   | 2,196                  |
| 2026 | 2,0421                  | 2,016                   | 2,5994                  | 2,2788                  | 2,0647                  | 2,0317                  | 2,226                   | 2,180                  |
| 2027 | 2,0363                  | 2,0065                  | 2,5607                  | 2,2524                  | 2,0581                  | 2,0276                  | 2,205                   | 2,164                  |
| 2028 | 2,0305                  | 1,997                   | 2,522                   | 2,226                   | 2,0515                  | 2,0235                  | 2,184                   | 2,148                  |
| 2029 | 2,0247                  | 1,9875                  | 2,4833                  | 2,1996                  | 2,0449                  | 2,0194                  | 2,163                   | 2,132                  |
| 2030 | 2,0189                  | 1,978                   | 2,4446                  | 2,1732                  | 2,0383                  | 2,0153                  | 2,142                   | 2,116                  |

† Data of Fertility rate of DANE [1] was used to forecast the department's fertility rate from 2005 to 2030. Holt-Winters no seasonal method in EViews 5 (Quantitative Micro Software, LLC) was used to forecast the fertility rate. In the SD model we used data from 2005 to 2030 and the region fertility rate was calculated as the average of all departments' fertility rates.

**Table 76. Fraction of births by departments, body mass index category, and socioeconomic status (Central region) †**

| Population group |                | Lower SES (%/year) | Middle SES (%/year) | Higher SES (%/year) | Complete Urban Population (%/year) |
|------------------|----------------|--------------------|---------------------|---------------------|------------------------------------|
| Department 5     | Not-overweight | 84,62%             | 76,19%              | 75,76%              | 78,75%                             |
|                  | Overweight     | 7,69%              | 19,05%              | 21,21%              | 16,25%                             |
|                  | Obese          | 7,69%              | 4,76%               | 3,03%               | 5,00%                              |
| Department 17    | Not-overweight | 83,33%             | 100,00%             | 88,89%              | 89,58%                             |
|                  | Overweight     | 16,67%             | 0,00%               | 11,11%              | 10,42%                             |
|                  | Obese          | 0,00%              | 0,00%               | 0,00%               | 0,00%                              |
| Department 18    | Not-overweight | 83,33%             | 100,00%             | 88,89%              | 89,58%                             |
|                  | Overweight     | 16,67%             | 0,00%               | 11,11%              | 10,42%                             |
|                  | Obese          | 0,00%              | 0,00%               | 0,00%               | 0,00%                              |
| Department 41    | Not-overweight | 93,33%             | 100,00%             | 100,00%             | 97,78%                             |
|                  | Overweight     | 6,67%              | 0,00%               | 0,00%               | 2,22%                              |
|                  | Obese          | 0,00%              | 0,00%               | 0,00%               | 0,00%                              |
| Department 63    | Not-overweight | 100,00%            | 86,67%              | 72,22%              | 82,50%                             |
|                  | Overweight     | 0,00%              | 13,33%              | 16,67%              | 12,50%                             |
|                  | Obese          | 0,00%              | 0,00%               | 11,11%              | 5,00%                              |
| Department 66    | Not-overweight | 84,62%             | 76,19%              | 75,76%              | 78,75%                             |
|                  | Overweight     | 7,69%              | 19,05%              | 21,21%              | 16,25%                             |
|                  | Obese          | 7,69%              | 4,76%               | 3,03%               | 5,00%                              |
| Department 73    | Not-overweight | 60,00%             | 69,57%              | 76,47%              | 69,09%                             |
|                  | Overweight     | 33,33%             | 17,39%              | 23,53%              | 23,64%                             |
|                  | Obese          | 6,67%              | 13,04%              | 0,00%               | 7,27%                              |

† The fractions of births by each BMI category correspond to the prevalences by BMI category of children aged

0 to 12 months

**Table 77. Prevalent rates of entire population by age group, and body mass index category (Central region)**

| Departments   | Age group | Not- overweight in 2005 | Overweight in 2005 | Obese in 2005 | Not- overweight in 2010 | Overweight in 2010 | Obese in 2010 |
|---------------|-----------|-------------------------|--------------------|---------------|-------------------------|--------------------|---------------|
| Department 5  | 0-4       | 0.83732                 | 0.11005            | 0.05263       | 0.74096                 | 0.22139            | 0.03765       |
|               | 5-9       | 0.83732                 | 0.11005            | 0.05263       | 0.74119                 | 0.17751            | 0.08130       |
|               | 10-14     | 0.83691                 | 0.11159            | 0.05150       | 0.79765                 | 0.14941            | 0.05294       |
|               | 15-19     | 0.86711                 | 0.11628            | 0.01661       | 0.83252                 | 0.12136            | 0.04612       |
|               | 20-24     | 0.78987                 | 0.16456            | 0.04557       | 0.75272                 | 0.18750            | 0.05978       |
|               | 25-29     | 0.69325                 | 0.23926            | 0.06748       | 0.59807                 | 0.31672            | 0.08521       |
|               | 30-34     | 0.55319                 | 0.33333            | 0.11348       | 0.46724                 | 0.38276            | 0.15000       |
|               | 35-39     | 0.46687                 | 0.40060            | 0.13253       | 0.40039                 | 0.43195            | 0.16765       |
|               | 40-44     | 0.52381                 | 0.34603            | 0.13016       | 0.37862                 | 0.42935            | 0.19203       |
|               | 45-49     | 0.43949                 | 0.38854            | 0.17197       | 0.40541                 | 0.41261            | 0.18198       |
|               | 50-54     | 0.40249                 | 0.39834            | 0.19917       | 0.30097                 | 0.45243            | 0.24660       |
| Department 17 | 55-59     | 0.40113                 | 0.39548            | 0.20339       | 0.36705                 | 0.39306            | 0.23988       |
|               | 0-4       | 0.71724                 | 0.15172            | 0.13103       | 0.77470                 | 0.18972            | 0.03557       |
|               | 5-9       | 0.87671                 | 0.10959            | 0.01370       | 0.74859                 | 0.15254            | 0.09887       |
|               | 10-14     | 0.81707                 | 0.17073            | 0.01220       | 0.80000                 | 0.15802            | 0.04198       |
|               | 15-19     | 0.88462                 | 0.07692            | 0.03846       | 0.86190                 | 0.11429            | 0.02381       |
|               | 20-24     | 0.79167                 | 0.15476            | 0.05357       | 0.74845                 | 0.21118            | 0.04037       |
|               | 25-29     | 0.75000                 | 0.16379            | 0.08621       | 0.55918                 | 0.33061            | 0.11020       |
|               | 30-34     | 0.62185                 | 0.28571            | 0.09244       | 0.47917                 | 0.35000            | 0.17083       |
|               | 35-39     | 0.53623                 | 0.33333            | 0.13043       | 0.39922                 | 0.42248            | 0.17829       |
|               | 40-44     | 0.39695                 | 0.48855            | 0.11450       | 0.45588                 | 0.33824            | 0.20588       |
|               | 45-49     | 0.41818                 | 0.40000            | 0.18182       | 0.35985                 | 0.43939            | 0.20076       |
| Department 18 | 50-54     | 0.31068                 | 0.51456            | 0.17476       | 0.32031                 | 0.45703            | 0.22266       |
|               | 55-59     | 0.37624                 | 0.34653            | 0.27723       | 0.39791                 | 0.37696            | 0.22513       |
|               | 0-4       | 0.80702                 | 0.17105            | 0.02193       | 0.76923                 | 0.20000            | 0.03077       |
|               | 5-9       | 0.81579                 | 0.14474            | 0.03947       | 0.79252                 | 0.12925            | 0.07823       |
|               | 10-14     | 0.86765                 | 0.10294            | 0.02941       | 0.79016                 | 0.15410            | 0.05574       |
|               | 15-19     | 0.81188                 | 0.14851            | 0.03960       | 0.79839                 | 0.14919            | 0.05242       |
|               | 20-24     | 0.77640                 | 0.13043            | 0.09317       | 0.63291                 | 0.28481            | 0.08228       |
|               | 25-29     | 0.66400                 | 0.22400            | 0.11200       | 0.52542                 | 0.32203            | 0.15254       |
|               | 30-34     | 0.50420                 | 0.30252            | 0.19328       | 0.36000                 | 0.40571            | 0.23429       |
|               | 35-39     | 0.37647                 | 0.34118            | 0.28235       | 0.30469                 | 0.45313            | 0.24219       |
|               | 40-44     | 0.40476                 | 0.35714            | 0.23810       | 0.25197                 | 0.49606            | 0.25197       |
| Department 41 | 45-49     | 0.31169                 | 0.36364            | 0.32468       | 0.26667                 | 0.33333            | 0.40000       |
|               | 50-54     | 0.22667                 | 0.44000            | 0.33333       | 0.17355                 | 0.43802            | 0.38843       |
|               | 55-59     | 0.34043                 | 0.34043            | 0.31915       | 0.26250                 | 0.38750            | 0.35000       |
|               | 0-4       | 0.67130                 | 0.24074            | 0.08796       | 0.77959                 | 0.17551            | 0.04490       |
|               | 5-9       | 0.78571                 | 0.15873            | 0.05556       | 0.76015                 | 0.14391            | 0.09594       |
|               | 10-14     | 0.76316                 | 0.15789            | 0.07895       | 0.73256                 | 0.17442            | 0.09302       |
| Department 41 | 15-19     | 0.78992                 | 0.18487            | 0.02521       | 0.81227                 | 0.14440            | 0.04332       |
|               | 20-24     | 0.70000                 | 0.22500            | 0.07500       | 0.67347                 | 0.20408            | 0.12245       |

| Departments   | Age group     | Not- overweight in 2005 | Overweight in 2005 | Obese in 2005 | Not- overweight in 2010 | Overweight in 2010 | Obese in 2010 |
|---------------|---------------|-------------------------|--------------------|---------------|-------------------------|--------------------|---------------|
|               | 25-29         | 0.56115                 | 0.33813            | 0.10072       | 0.51445                 | 0.30636            | 0.17919       |
|               | 30-34         | 0.48428                 | 0.40881            | 0.10692       | 0.45882                 | 0.34118            | 0.20000       |
|               | 35-39         | 0.40816                 | 0.40816            | 0.18367       | 0.38571                 | 0.37143            | 0.24286       |
|               | 40-44         | 0.33813                 | 0.45324            | 0.20863       | 0.25984                 | 0.39370            | 0.34646       |
|               | 45-49         | 0.23881                 | 0.45522            | 0.30597       | 0.18978                 | 0.53285            | 0.27737       |
|               | 50-54         | 0.26786                 | 0.43750            | 0.29464       | 0.20930                 | 0.47287            | 0.31783       |
|               | 55-59         | 0.25000                 | 0.43750            | 0.31250       | 0.25000                 | 0.41667            | 0.33333       |
| Department 63 | 0-4           | 0.76531                 | 0.17347            | 0.06122       | 0.74093                 | 0.20984            | 0.04922       |
|               | 5-9           | 0.75893                 | 0.19643            | 0.04464       | 0.78497                 | 0.13987            | 0.07516       |
|               | 10-14         | 0.85470                 | 0.12821            | 0.01709       | 0.78261                 | 0.17202            | 0.04537       |
|               | 15-19         | 0.90604                 | 0.06040            | 0.03356       | 0.83559                 | 0.12959            | 0.03482       |
|               | 20-24         | 0.81702                 | 0.15319            | 0.02979       | 0.73990                 | 0.18939            | 0.07071       |
|               | 25-29         | 0.65652                 | 0.28261            | 0.06087       | 0.54593                 | 0.33333            | 0.12073       |
|               | 30-34         | 0.59172                 | 0.32544            | 0.08284       | 0.50000                 | 0.38050            | 0.11950       |
|               | 35-39         | 0.51208                 | 0.35749            | 0.13043       | 0.43599                 | 0.39100            | 0.17301       |
|               | 40-44         | 0.52404                 | 0.29327            | 0.18269       | 0.39106                 | 0.38547            | 0.22346       |
|               | 45-49         | 0.41627                 | 0.41148            | 0.17225       | 0.36792                 | 0.43082            | 0.20126       |
|               | 50-54         | 0.37126                 | 0.43713            | 0.19162       | 0.34516                 | 0.39677            | 0.25806       |
|               | 55-59         | 0.30370                 | 0.47407            | 0.22222       | 0.30000                 | 0.41071            | 0.28929       |
|               | Department 66 | 0-4                     | 0.76531            | 0.17347       | 0.06122                 | 0.75146            | 0.19298       |
| 5-9           |               | 0.75893                 | 0.19643            | 0.04464       | 0.75234                 | 0.15888            | 0.08879       |
| 10-14         |               | 0.85470                 | 0.12821            | 0.01709       | 0.78959                 | 0.16742            | 0.04299       |
| 15-19         |               | 0.90604                 | 0.06040            | 0.03356       | 0.85412                 | 0.11529            | 0.03059       |
| 20-24         |               | 0.81702                 | 0.15319            | 0.02979       | 0.75068                 | 0.20000            | 0.04932       |
| 25-29         |               | 0.65652                 | 0.28261            | 0.06087       | 0.60188                 | 0.28213            | 0.11599       |
| 30-34         |               | 0.59172                 | 0.32544            | 0.08284       | 0.53974                 | 0.30795            | 0.15232       |
| 35-39         |               | 0.51208                 | 0.35749            | 0.13043       | 0.47101                 | 0.38406            | 0.14493       |
| 40-44         |               | 0.52404                 | 0.29327            | 0.18269       | 0.42593                 | 0.41049            | 0.16358       |
| 45-49         |               | 0.41627                 | 0.41148            | 0.17225       | 0.38276                 | 0.42759            | 0.18966       |
| 50-54         |               | 0.37126                 | 0.43713            | 0.19162       | 0.36161                 | 0.41518            | 0.22321       |
| 55-59         |               | 0.30841                 | 0.48598            | 0.20561       | 0.31579                 | 0.45175            | 0.23246       |
| Department 73 |               | 0-4                     | 0.67130            | 0.24074       | 0.08796                 | 0.72204            | 0.20767       |
|               | 5-9           | 0.78571                 | 0.15873            | 0.05556       | 0.78593                 | 0.15596            | 0.05810       |
|               | 10-14         | 0.76316                 | 0.15789            | 0.07895       | 0.78526                 | 0.16346            | 0.05128       |
|               | 15-19         | 0.78992                 | 0.18487            | 0.02521       | 0.81961                 | 0.13725            | 0.04314       |
|               | 20-24         | 0.70000                 | 0.22500            | 0.07500       | 0.67895                 | 0.22632            | 0.09474       |
|               | 25-29         | 0.56115                 | 0.33813            | 0.10072       | 0.57222                 | 0.26667            | 0.16111       |
|               | 30-34         | 0.48428                 | 0.40881            | 0.10692       | 0.38509                 | 0.39130            | 0.22360       |
|               | 35-39         | 0.40816                 | 0.40816            | 0.18367       | 0.36496                 | 0.36496            | 0.27007       |
|               | 40-44         | 0.33813                 | 0.45324            | 0.20863       | 0.34066                 | 0.45604            | 0.20330       |
|               | 45-49         | 0.23881                 | 0.45522            | 0.30597       | 0.23913                 | 0.47826            | 0.28261       |
|               | 50-54         | 0.26786                 | 0.43750            | 0.29464       | 0.23649                 | 0.44595            | 0.31757       |
|               | 55-59         | 0.25000                 | 0.43750            | 0.31250       | 0.28682                 | 0.38760            | 0.32558       |

**Table 78. Prevalent rates of lower socioeconomic status population by age group, and body mass index category (Central region)**

| Departments   | Age group | Not- overweight in 2005 | Overweight in 2005 | Obese in 2005 | Not- overweight in 2010 | Overweight in 2010 | Obese in 2010 |
|---------------|-----------|-------------------------|--------------------|---------------|-------------------------|--------------------|---------------|
| Department 5  | 0-4       | 0.85294                 | 0.11765            | 0.02941       | 0.75978                 | 0.18994            | 0.05028       |
|               | 5-9       | 0.85294                 | 0.11765            | 0.02941       | 0.87425                 | 0.10778            | 0.01796       |
|               | 10-14     | 0.88235                 | 0.09804            | 0.01961       | 0.87166                 | 0.09626            | 0.03209       |
|               | 15-19     | 0.88406                 | 0.11594            | 0.00000       | 0.82609                 | 0.13043            | 0.04348       |
|               | 20-24     | 0.77778                 | 0.13889            | 0.08333       | 0.80000                 | 0.13600            | 0.06400       |
|               | 25-29     | 0.61404                 | 0.33333            | 0.05263       | 0.66337                 | 0.25743            | 0.07921       |
|               | 30-34     | 0.43902                 | 0.41463            | 0.14634       | 0.45745                 | 0.35106            | 0.19149       |
|               | 35-39     | 0.46939                 | 0.42857            | 0.10204       | 0.39241                 | 0.39241            | 0.21519       |
|               | 40-44     | 0.44000                 | 0.34000            | 0.22000       | 0.38667                 | 0.42667            | 0.18667       |
|               | 45-49     | 0.46000                 | 0.42000            | 0.12000       | 0.45714                 | 0.32857            | 0.21429       |
|               | 50-54     | 0.56522                 | 0.32609            | 0.10870       | 0.39655                 | 0.41379            | 0.18966       |
|               | 55-59     | 0.55556                 | 0.25926            | 0.18519       | 0.54902                 | 0.33333            | 0.11765       |
| Department 17 | 0-4       | 0.68421                 | 0.28947            | 0.02632       | 0.81538                 | 0.15385            | 0.03077       |
|               | 5-9       | 0.91667                 | 0.08333            | 0.00000       | 0.84158                 | 0.08911            | 0.06931       |
|               | 10-14     | 0.75000                 | 0.25000            | 0.00000       | 0.86735                 | 0.10204            | 0.03061       |
|               | 15-19     | 0.93750                 | 0.06250            | 0.00000       | 0.88372                 | 0.11628            | 0.00000       |
|               | 20-24     | 0.76000                 | 0.20000            | 0.04000       | 0.80822                 | 0.15068            | 0.04110       |
|               | 25-29     | 0.84000                 | 0.12000            | 0.04000       | 0.62791                 | 0.25581            | 0.11628       |
|               | 30-34     | 0.61111                 | 0.27778            | 0.11111       | 0.58696                 | 0.30435            | 0.10870       |
|               | 35-39     | 0.63158                 | 0.26316            | 0.10526       | 0.46000                 | 0.34000            | 0.20000       |
|               | 40-44     | 0.14286                 | 0.57143            | 0.28571       | 0.51020                 | 0.28571            | 0.20408       |
|               | 45-49     | 0.56000                 | 0.40000            | 0.04000       | 0.37500                 | 0.39583            | 0.22917       |
|               | 50-54     | 0.46154                 | 0.38462            | 0.15385       | 0.43182                 | 0.38636            | 0.18182       |
|               | 55-59     | 0.52381                 | 0.19048            | 0.28571       | 0.38710                 | 0.35484            | 0.25806       |
| Department 18 | 0-4       | 0.77778                 | 0.20000            | 0.02222       | 0.75362                 | 0.21014            | 0.03623       |
|               | 5-9       | 0.77273                 | 0.18182            | 0.04545       | 0.81646                 | 0.12658            | 0.05696       |
|               | 10-14     | 0.84000                 | 0.12000            | 0.04000       | 0.81395                 | 0.12791            | 0.05814       |
|               | 15-19     | 0.74074                 | 0.22222            | 0.03704       | 0.78358                 | 0.14925            | 0.06716       |
|               | 20-24     | 0.88000                 | 0.06000            | 0.06000       | 0.69118                 | 0.22059            | 0.08824       |
|               | 25-29     | 0.70000                 | 0.23333            | 0.06667       | 0.56250                 | 0.30000            | 0.13750       |
|               | 30-34     | 0.53125                 | 0.34375            | 0.12500       | 0.38947                 | 0.38947            | 0.22105       |
|               | 35-39     | 0.20000                 | 0.48000            | 0.32000       | 0.30159                 | 0.41270            | 0.28571       |
|               | 40-44     | 0.33333                 | 0.50000            | 0.16667       | 0.26923                 | 0.48077            | 0.25000       |
|               | 45-49     | 0.53846                 | 0.30769            | 0.15385       | 0.33333                 | 0.41667            | 0.25000       |
|               | 50-54     | 0.35000                 | 0.40000            | 0.25000       | 0.22951                 | 0.40984            | 0.36066       |
|               | 55-59     | 0.50000                 | 0.35714            | 0.14286       | 0.27273                 | 0.48485            | 0.24242       |
| Department 41 | 0-4       | 0.70769                 | 0.20000            | 0.09231       | 0.72308                 | 0.24615            | 0.03077       |
|               | 5-9       | 0.82609                 | 0.17391            | 0.00000       | 0.84211                 | 0.12281            | 0.03509       |
|               | 10-14     | 0.88889                 | 0.11111            | 0.00000       | 0.91667                 | 0.08333            | 0.00000       |
|               | 15-19     | 0.80769                 | 0.19231            | 0.00000       | 0.85714                 | 0.11905            | 0.02381       |
|               | 20-24     | 0.68966                 | 0.20690            | 0.10345       | 0.72222                 | 0.11111            | 0.16667       |
|               | 25-29     | 0.70370                 | 0.25926            | 0.03704       | 0.58621                 | 0.24138            | 0.17241       |
|               | 30-34     | 0.53333                 | 0.43333            | 0.03333       | 0.51613                 | 0.25806            | 0.22581       |

| Departments   | Age group     | Not- overweight in 2005 | Overweight in 2005 | Obese in 2005 | Not- overweight in 2010 | Overweight in 2010 | Obese in 2010 |
|---------------|---------------|-------------------------|--------------------|---------------|-------------------------|--------------------|---------------|
|               | 35-39         | 0.42105                 | 0.42105            | 0.15789       | 0.45000                 | 0.45000            | 0.10000       |
|               | 40-44         | 0.52941                 | 0.17647            | 0.29412       | 0.50000                 | 0.35714            | 0.14286       |
|               | 45-49         | 0.29412                 | 0.58824            | 0.11765       | 0.25000                 | 0.50000            | 0.25000       |
|               | 50-54         | 0.26667                 | 0.53333            | 0.20000       | 0.14286                 | 0.57143            | 0.28571       |
|               | 55-59         | 0.45455                 | 0.27273            | 0.27273       | 0.35714                 | 0.14286            | 0.50000       |
| Department 63 | 0-4           | 0.92405                 | 0.05063            | 0.02532       | 0.77551                 | 0.16327            | 0.06122       |
|               | 5-9           | 0.87879                 | 0.12121            | 0.00000       | 0.85185                 | 0.09877            | 0.04938       |
|               | 10-14         | 0.96552                 | 0.03448            | 0.00000       | 0.85915                 | 0.11268            | 0.02817       |
|               | 15-19         | 0.87500                 | 0.12500            | 0.00000       | 0.87097                 | 0.11290            | 0.01613       |
|               | 20-24         | 0.89655                 | 0.10345            | 0.00000       | 0.77273                 | 0.22727            | 0.00000       |
|               | 25-29         | 0.63158                 | 0.23684            | 0.13158       | 0.59184                 | 0.30612            | 0.10204       |
|               | 30-34         | 0.59459                 | 0.35135            | 0.05405       | 0.55000                 | 0.35000            | 0.10000       |
|               | 35-39         | 0.58974                 | 0.28205            | 0.12821       | 0.51429                 | 0.37143            | 0.11429       |
|               | 40-44         | 0.43478                 | 0.26087            | 0.30435       | 0.45000                 | 0.35000            | 0.20000       |
|               | 45-49         | 0.45000                 | 0.45000            | 0.10000       | 0.41176                 | 0.35294            | 0.23529       |
|               | 50-54         | 0.54545                 | 0.36364            | 0.09091       | 0.43478                 | 0.30435            | 0.26087       |
|               | 55-59         | 0.28571                 | 0.42857            | 0.28571       | 0.42308                 | 0.30769            | 0.26923       |
|               | Department 66 | 0-4                     | 0.92405            | 0.05063       | 0.02532                 | 0.78873            | 0.18310       |
| 5-9           |               | 0.87879                 | 0.12121            | 0.00000       | 0.83750                 | 0.12500            | 0.03750       |
| 10-14         |               | 0.96552                 | 0.03448            | 0.00000       | 0.92754                 | 0.07246            | 0.00000       |
| 15-19         |               | 0.87500                 | 0.12500            | 0.00000       | 0.86207                 | 0.10345            | 0.03448       |
| 20-24         |               | 0.89655                 | 0.10345            | 0.00000       | 0.77358                 | 0.15094            | 0.07547       |
| 25-29         |               | 0.63158                 | 0.23684            | 0.13158       | 0.67442                 | 0.23256            | 0.09302       |
| 30-34         |               | 0.59459                 | 0.35135            | 0.05405       | 0.65116                 | 0.20930            | 0.13953       |
| 35-39         |               | 0.58974                 | 0.28205            | 0.12821       | 0.58065                 | 0.35484            | 0.06452       |
| 40-44         |               | 0.43478                 | 0.26087            | 0.30435       | 0.61765                 | 0.32353            | 0.05882       |
| 45-49         |               | 0.45000                 | 0.45000            | 0.10000       | 0.50000                 | 0.30000            | 0.20000       |
| 50-54         |               | 0.54545                 | 0.36364            | 0.09091       | 0.57143                 | 0.33333            | 0.09524       |
| 55-59         |               | 0.28571                 | 0.42857            | 0.28571       | 0.43478                 | 0.43478            | 0.13043       |
| Department 73 |               | 0-4                     | 0.70769            | 0.20000       | 0.09231                 | 0.73034            | 0.19101       |
|               | 5-9           | 0.82609                 | 0.17391            | 0.00000       | 0.85714                 | 0.10989            | 0.03297       |
|               | 10-14         | 0.88889                 | 0.11111            | 0.00000       | 0.83824                 | 0.11765            | 0.04412       |
|               | 15-19         | 0.80769                 | 0.19231            | 0.00000       | 0.81818                 | 0.16364            | 0.01818       |
|               | 20-24         | 0.68966                 | 0.20690            | 0.10345       | 0.67500                 | 0.17500            | 0.15000       |
|               | 25-29         | 0.70370                 | 0.25926            | 0.03704       | 0.68182                 | 0.11364            | 0.20455       |
|               | 30-34         | 0.53333                 | 0.43333            | 0.03333       | 0.44828                 | 0.34483            | 0.20690       |
|               | 35-39         | 0.42105                 | 0.42105            | 0.15789       | 0.46875                 | 0.25000            | 0.28125       |
|               | 40-44         | 0.52941                 | 0.17647            | 0.29412       | 0.31034                 | 0.27586            | 0.41379       |
|               | 45-49         | 0.29412                 | 0.58824            | 0.11765       | 0.45161                 | 0.38710            | 0.16129       |
|               | 50-54         | 0.26667                 | 0.53333            | 0.20000       | 0.28125                 | 0.43750            | 0.28125       |
|               | 55-59         | 0.45455                 | 0.27273            | 0.27273       | 0.50000                 | 0.27778            | 0.22222       |

**Table 79. Prevalent rates of middle socioeconomic status population by age group, and body mass index category (Central region)**

| Departments   | Age group | Not- overweight in 2005 | Overweight in 2005 | Obese in 2005 | Not- overweight in 2010 | Overweight in 2010 | Obese in 2010 |
|---------------|-----------|-------------------------|--------------------|---------------|-------------------------|--------------------|---------------|
| Department 5  | 0-4       | 0.85294                 | 0.11765            | 0.02941       | 0.72464                 | 0.26570            | 0.00966       |
|               | 5-9       | 0.85294                 | 0.11765            | 0.02941       | 0.72566                 | 0.18142            | 0.09292       |
|               | 10-14     | 0.88235                 | 0.09804            | 0.01961       | 0.82022                 | 0.13483            | 0.04494       |
|               | 15-19     | 0.88406                 | 0.11594            | 0.00000       | 0.85774                 | 0.09623            | 0.04603       |
|               | 20-24     | 0.77778                 | 0.13889            | 0.08333       | 0.78509                 | 0.17544            | 0.03947       |
|               | 25-29     | 0.61404                 | 0.33333            | 0.05263       | 0.59896                 | 0.31250            | 0.08854       |
|               | 30-34     | 0.43902                 | 0.41463            | 0.14634       | 0.42623                 | 0.42623            | 0.14754       |
|               | 35-39     | 0.46939                 | 0.42857            | 0.10204       | 0.47682                 | 0.37748            | 0.14570       |
|               | 40-44     | 0.44000                 | 0.34000            | 0.22000       | 0.36306                 | 0.35032            | 0.28662       |
|               | 45-49     | 0.46000                 | 0.42000            | 0.12000       | 0.42857                 | 0.39456            | 0.17687       |
|               | 50-54     | 0.56522                 | 0.32609            | 0.10870       | 0.29861                 | 0.44444            | 0.25694       |
| 55-59         | 0.55556   | 0.25926                 | 0.18519            | 0.35526       | 0.39474                 | 0.25000            |               |
| Department 17 | 0-4       | 0.69231                 | 0.15385            | 0.15385       | 0.73034                 | 0.22472            | 0.04494       |
|               | 5-9       | 0.84000                 | 0.16000            | 0.00000       | 0.79439                 | 0.14019            | 0.06542       |
|               | 10-14     | 0.82143                 | 0.17857            | 0.00000       | 0.83471                 | 0.10744            | 0.05785       |
|               | 15-19     | 0.88000                 | 0.08000            | 0.04000       | 0.84559                 | 0.11765            | 0.03676       |
|               | 20-24     | 0.84783                 | 0.10870            | 0.04348       | 0.71765                 | 0.20000            | 0.08235       |
|               | 25-29     | 0.74194                 | 0.19355            | 0.06452       | 0.48684                 | 0.35526            | 0.15789       |
|               | 30-34     | 0.63636                 | 0.30303            | 0.06061       | 0.47826                 | 0.33696            | 0.18478       |
|               | 35-39     | 0.50000                 | 0.44444            | 0.05556       | 0.36364                 | 0.38961            | 0.24675       |
|               | 40-44     | 0.34483                 | 0.55172            | 0.10345       | 0.43590                 | 0.38462            | 0.17949       |
|               | 45-49     | 0.40000                 | 0.51429            | 0.08571       | 0.33766                 | 0.46753            | 0.19481       |
|               | 50-54     | 0.26087                 | 0.43478            | 0.30435       | 0.25882                 | 0.51765            | 0.22353       |
| 55-59         | 0.45455   | 0.45455                 | 0.09091            | 0.49153       | 0.28814                 | 0.22034            |               |
| Department 18 | 0-4       | 0.77778                 | 0.20000            | 0.02222       | 0.79048                 | 0.19048            | 0.01905       |
|               | 5-9       | 0.77273                 | 0.18182            | 0.04545       | 0.77273                 | 0.14545            | 0.08182       |
|               | 10-14     | 0.84000                 | 0.12000            | 0.04000       | 0.77679                 | 0.16964            | 0.05357       |
|               | 15-19     | 0.74074                 | 0.22222            | 0.03704       | 0.81395                 | 0.16279            | 0.02326       |
|               | 20-24     | 0.88000                 | 0.06000            | 0.06000       | 0.67164                 | 0.25373            | 0.07463       |
|               | 25-29     | 0.70000                 | 0.23333            | 0.06667       | 0.47945                 | 0.34247            | 0.17808       |
|               | 30-34     | 0.53125                 | 0.34375            | 0.12500       | 0.32258                 | 0.43548            | 0.24194       |
|               | 35-39     | 0.20000                 | 0.48000            | 0.32000       | 0.32692                 | 0.48077            | 0.19231       |
|               | 40-44     | 0.33333                 | 0.50000            | 0.16667       | 0.28070                 | 0.50877            | 0.21053       |
|               | 45-49     | 0.53846                 | 0.30769            | 0.15385       | 0.24074                 | 0.31481            | 0.44444       |
|               | 50-54     | 0.35000                 | 0.40000            | 0.25000       | 0.07143                 | 0.52381            | 0.40476       |
| 55-59         | 0.50000   | 0.35714                 | 0.14286            | 0.30303       | 0.36364                 | 0.33333            |               |
| Department 41 | 0-4       | 0.70769                 | 0.20000            | 0.09231       | 0.78571                 | 0.14286            | 0.07143       |
|               | 5-9       | 0.82609                 | 0.17391            | 0.00000       | 0.78641                 | 0.11650            | 0.09709       |
|               | 10-14     | 0.88889                 | 0.11111            | 0.00000       | 0.70297                 | 0.18812            | 0.10891       |
|               | 15-19     | 0.80769                 | 0.19231            | 0.00000       | 0.73636                 | 0.19091            | 0.07273       |
|               | 20-24     | 0.68966                 | 0.20690            | 0.10345       | 0.62791                 | 0.24419            | 0.12791       |
|               | 25-29     | 0.70370                 | 0.25926            | 0.03704       | 0.56250                 | 0.25000            | 0.18750       |
|               | 30-34     | 0.53333                 | 0.43333            | 0.03333       | 0.44898                 | 0.32653            | 0.22449       |
|               | 35-39     | 0.42105                 | 0.42105            | 0.15789       | 0.27660                 | 0.42553            | 0.29787       |
| 40-44         | 0.52941   | 0.17647                 | 0.29412            | 0.18000       | 0.42000                 | 0.40000            |               |

| Departments   | Age group     | Not- overweight in 2005 | Overweight in 2005 | Obese in 2005 | Not- overweight in 2010 | Overweight in 2010 | Obese in 2010 |
|---------------|---------------|-------------------------|--------------------|---------------|-------------------------|--------------------|---------------|
|               | 45-49         | 0.29412                 | 0.58824            | 0.11765       | 0.19608                 | 0.52941            | 0.27451       |
|               | 50-54         | 0.26667                 | 0.53333            | 0.20000       | 0.22222                 | 0.51111            | 0.26667       |
|               | 55-59         | 0.45455                 | 0.27273            | 0.27273       | 0.19231                 | 0.46154            | 0.34615       |
| Department 63 | 0-4           | 0.92405                 | 0.05063            | 0.02532       | 0.74684                 | 0.20886            | 0.04430       |
|               | 5-9           | 0.87879                 | 0.12121            | 0.00000       | 0.77895                 | 0.14211            | 0.07895       |
|               | 10-14         | 0.96552                 | 0.03448            | 0.00000       | 0.78713                 | 0.17327            | 0.03960       |
|               | 15-19         | 0.87500                 | 0.12500            | 0.00000       | 0.87647                 | 0.10588            | 0.01765       |
|               | 20-24         | 0.89655                 | 0.10345            | 0.00000       | 0.72727                 | 0.16970            | 0.10303       |
|               | 25-29         | 0.63158                 | 0.23684            | 0.13158       | 0.48905                 | 0.35766            | 0.15328       |
|               | 30-34         | 0.59459                 | 0.35135            | 0.05405       | 0.44860                 | 0.40187            | 0.14953       |
|               | 35-39         | 0.58974                 | 0.28205            | 0.12821       | 0.42718                 | 0.42718            | 0.14563       |
|               | 40-44         | 0.43478                 | 0.26087            | 0.30435       | 0.37719                 | 0.39474            | 0.22807       |
|               | 45-49         | 0.45000                 | 0.45000            | 0.10000       | 0.41837                 | 0.40816            | 0.17347       |
|               | 50-54         | 0.54545                 | 0.36364            | 0.09091       | 0.42353                 | 0.38824            | 0.18824       |
|               | 55-59         | 0.28571                 | 0.42857            | 0.28571       | 0.25000                 | 0.40278            | 0.34722       |
|               | Department 66 | 0-4                     | 0.85294            | 0.11765       | 0.02941                 | 0.71901            | 0.25620       |
| 5-9           |               | 0.85294                 | 0.11765            | 0.02941       | 0.76471                 | 0.16340            | 0.07190       |
| 10-14         |               | 0.88235                 | 0.09804            | 0.01961       | 0.76433                 | 0.19745            | 0.03822       |
| 15-19         |               | 0.88406                 | 0.11594            | 0.00000       | 0.85385                 | 0.11538            | 0.03077       |
| 20-24         |               | 0.77778                 | 0.13889            | 0.08333       | 0.77692                 | 0.16154            | 0.06154       |
| 25-29         |               | 0.61404                 | 0.33333            | 0.05263       | 0.65217                 | 0.21739            | 0.13043       |
| 30-34         |               | 0.43902                 | 0.41463            | 0.14634       | 0.51515                 | 0.28283            | 0.20202       |
| 35-39         |               | 0.46939                 | 0.42857            | 0.10204       | 0.48515                 | 0.38614            | 0.12871       |
| 40-44         |               | 0.44000                 | 0.34000            | 0.22000       | 0.40230                 | 0.36782            | 0.22989       |
| 45-49         |               | 0.46000                 | 0.42000            | 0.12000       | 0.46988                 | 0.37349            | 0.15663       |
| 50-54         |               | 0.56522                 | 0.32609            | 0.10870       | 0.36145                 | 0.31325            | 0.32530       |
| 55-59         |               | 0.55556                 | 0.25926            | 0.18519       | 0.28788                 | 0.48485            | 0.22727       |
| Department 73 |               | 0-4                     | 0.70769            | 0.20000       | 0.09231                 | 0.77600            | 0.18400       |
|               | 5-9           | 0.82609                 | 0.17391            | 0.00000       | 0.77273                 | 0.14545            | 0.08182       |
|               | 10-14         | 0.88889                 | 0.11111            | 0.00000       | 0.79630                 | 0.14815            | 0.05556       |
|               | 15-19         | 0.80769                 | 0.19231            | 0.00000       | 0.82051                 | 0.15385            | 0.02564       |
|               | 20-24         | 0.68966                 | 0.20690            | 0.10345       | 0.70000                 | 0.24286            | 0.05714       |
|               | 25-29         | 0.70370                 | 0.25926            | 0.03704       | 0.58824                 | 0.25490            | 0.15686       |
|               | 30-34         | 0.53333                 | 0.43333            | 0.03333       | 0.43103                 | 0.44828            | 0.12069       |
|               | 35-39         | 0.42105                 | 0.42105            | 0.15789       | 0.30769                 | 0.46154            | 0.23077       |
|               | 40-44         | 0.52941                 | 0.17647            | 0.29412       | 0.37288                 | 0.42373            | 0.20339       |
|               | 45-49         | 0.29412                 | 0.58824            | 0.11765       | 0.18966                 | 0.55172            | 0.25862       |
|               | 50-54         | 0.26667                 | 0.53333            | 0.20000       | 0.39286                 | 0.46429            | 0.14286       |
|               | 55-59         | 0.45455                 | 0.27273            | 0.27273       | 0.35000                 | 0.30000            | 0.35000       |

**Table 80. Prevalent rates of higher socioeconomic status population by age group, and body mass index category (Central region)**



| Departments   | Age group | Not- overweight in 2005 | Overweight in 2005 | Obese in 2005 | Not- overweight in 2010 | Overweight in 2010 | Obese in 2010 |
|---------------|-----------|-------------------------|--------------------|---------------|-------------------------|--------------------|---------------|
| Department 5  | 0-4       | 0.85294                 | 0.11765            | 0.02941       | 0.74101                 | 0.20863            | 0.05036       |
|               | 5-9       | 0.85294                 | 0.11765            | 0.02941       | 0.68696                 | 0.20870            | 0.10435       |
|               | 10-14     | 0.88235                 | 0.09804            | 0.01961       | 0.74747                 | 0.18434            | 0.06818       |
|               | 15-19     | 0.88406                 | 0.11594            | 0.00000       | 0.82075                 | 0.13208            | 0.04717       |
|               | 20-24     | 0.77778                 | 0.13889            | 0.08333       | 0.71802                 | 0.21149            | 0.07050       |
|               | 25-29     | 0.61404                 | 0.33333            | 0.05263       | 0.57751                 | 0.33739            | 0.08511       |
|               | 30-34     | 0.43902                 | 0.41463            | 0.14634       | 0.49505                 | 0.36634            | 0.13861       |
|               | 35-39     | 0.46939                 | 0.42857            | 0.10204       | 0.36101                 | 0.47292            | 0.16606       |
|               | 40-44     | 0.44000                 | 0.34000            | 0.22000       | 0.38438                 | 0.46875            | 0.14688       |
|               | 45-49     | 0.46000                 | 0.42000            | 0.12000       | 0.38462                 | 0.43787            | 0.17751       |
|               | 50-54     | 0.56522                 | 0.32609            | 0.10870       | 0.28435                 | 0.46326            | 0.25240       |
| Department 17 | 0-4       | 0.55556                 | 0.25926            | 0.18519       | 0.32877                 | 0.40639            | 0.26484       |
|               | 5-9       | 0.76364                 | 0.05455            | 0.18182       | 0.78788                 | 0.18182            | 0.03030       |
|               | 10-14     | 0.88889                 | 0.08333            | 0.02778       | 0.65068                 | 0.20548            | 0.14384       |
|               | 15-19     | 0.82609                 | 0.15217            | 0.02174       | 0.74194                 | 0.22043            | 0.03763       |
|               | 20-24     | 0.88060                 | 0.07463            | 0.04478       | 0.86364                 | 0.11111            | 0.02525       |
|               | 25-29     | 0.77320                 | 0.16495            | 0.06186       | 0.73780                 | 0.24390            | 0.01829       |
|               | 30-34     | 0.71667                 | 0.16667            | 0.11667       | 0.57937                 | 0.34127            | 0.07937       |
|               | 35-39     | 0.61765                 | 0.27941            | 0.10294       | 0.43137                 | 0.38235            | 0.18627       |
|               | 40-44     | 0.53012                 | 0.30120            | 0.16867       | 0.39695                 | 0.47328            | 0.12977       |
|               | 45-49     | 0.43158                 | 0.46316            | 0.10526       | 0.44828                 | 0.33103            | 0.22069       |
|               | 50-54     | 0.39048                 | 0.36190            | 0.24762       | 0.36691                 | 0.43885            | 0.19424       |
| Department 18 | 55-59     | 0.29851                 | 0.56716            | 0.13433       | 0.32283                 | 0.44094            | 0.23622       |
|               | 0-4       | 0.31884                 | 0.37681            | 0.30435       | 0.34653                 | 0.43564            | 0.21782       |
|               | 5-9       | 0.77778                 | 0.20000            | 0.02222       | 0.76471                 | 0.17647            | 0.05882       |
|               | 10-14     | 0.77273                 | 0.18182            | 0.04545       | 0.73077                 | 0.07692            | 0.19231       |
|               | 15-19     | 0.84000                 | 0.12000            | 0.04000       | 0.66667                 | 0.28571            | 0.04762       |
|               | 20-24     | 0.74074                 | 0.22222            | 0.03704       | 0.82143                 | 0.10714            | 0.07143       |
|               | 25-29     | 0.88000                 | 0.06000            | 0.06000       | 0.34783                 | 0.56522            | 0.08696       |
|               | 30-34     | 0.70000                 | 0.23333            | 0.06667       | 0.54167                 | 0.33333            | 0.12500       |
|               | 35-39     | 0.53125                 | 0.34375            | 0.12500       | 0.33333                 | 0.38889            | 0.27778       |
|               | 40-44     | 0.20000                 | 0.48000            | 0.32000       | 0.23077                 | 0.53846            | 0.23077       |
|               | 45-49     | 0.33333                 | 0.50000            | 0.16667       | 0.11111                 | 0.50000            | 0.38889       |
| Department 41 | 50-54     | 0.53846                 | 0.30769            | 0.15385       | 0.20000                 | 0.20000            | 0.60000       |
|               | 55-59     | 0.35000                 | 0.40000            | 0.25000       | 0.22222                 | 0.33333            | 0.44444       |
|               | 0-4       | 0.50000                 | 0.35714            | 0.14286       | 0.14286                 | 0.21429            | 0.64286       |
|               | 5-9       | 0.70769                 | 0.20000            | 0.09231       | 0.81250                 | 0.15625            | 0.03125       |
|               | 10-14     | 0.82609                 | 0.17391            | 0.00000       | 0.69369                 | 0.18018            | 0.12613       |
|               | 15-19     | 0.88889                 | 0.11111            | 0.00000       | 0.67890                 | 0.20183            | 0.11927       |
|               | 20-24     | 0.80769                 | 0.19231            | 0.00000       | 0.86400                 | 0.11200            | 0.02400       |
|               | 25-29     | 0.68966                 | 0.20690            | 0.10345       | 0.70270                 | 0.20270            | 0.09459       |
|               | 30-34     | 0.70370                 | 0.25926            | 0.03704       | 0.45000                 | 0.37500            | 0.17500       |
|               | 35-39     | 0.53333                 | 0.43333            | 0.03333       | 0.44444                 | 0.37778            | 0.17778       |
|               | 40-44     | 0.42105                 | 0.42105            | 0.15789       | 0.43836                 | 0.31507            | 0.24658       |
| 50-54         | 0.52941   | 0.17647                 | 0.29412            | 0.26984       | 0.38095                 | 0.34921            |               |

| Departments   | Age group     | Not- overweight in 2005 | Overweight in 2005 | Obese in 2005 | Not- overweight in 2010 | Overweight in 2010 | Obese in 2010 |
|---------------|---------------|-------------------------|--------------------|---------------|-------------------------|--------------------|---------------|
|               | 45-49         | 0.29412                 | 0.58824            | 0.11765       | 0.17143                 | 0.54286            | 0.28571       |
|               | 50-54         | 0.26667                 | 0.53333            | 0.20000       | 0.21429                 | 0.42857            | 0.35714       |
|               | 55-59         | 0.45455                 | 0.27273            | 0.27273       | 0.25000                 | 0.47727            | 0.27273       |
| Department 63 | 0-4           | 0.92405                 | 0.05063            | 0.02532       | 0.72626                 | 0.22346            | 0.05028       |
|               | 5-9           | 0.87879                 | 0.12121            | 0.00000       | 0.76442                 | 0.15385            | 0.08173       |
|               | 10-14         | 0.96552                 | 0.03448            | 0.00000       | 0.75781                 | 0.18750            | 0.05469       |
|               | 15-19         | 0.87500                 | 0.12500            | 0.00000       | 0.80351                 | 0.14737            | 0.04912       |
|               | 20-24         | 0.89655                 | 0.10345            | 0.00000       | 0.74332                 | 0.19786            | 0.05882       |
|               | 25-29         | 0.63158                 | 0.23684            | 0.13158       | 0.57436                 | 0.32308            | 0.10256       |
|               | 30-34         | 0.59459                 | 0.35135            | 0.05405       | 0.52047                 | 0.37427            | 0.10526       |
|               | 35-39         | 0.58974                 | 0.28205            | 0.12821       | 0.42384                 | 0.37086            | 0.20530       |
|               | 40-44         | 0.43478                 | 0.26087            | 0.30435       | 0.38725                 | 0.38725            | 0.22549       |
|               | 45-49         | 0.45000                 | 0.45000            | 0.10000       | 0.33333                 | 0.45699            | 0.20968       |
|               | 50-54         | 0.54545                 | 0.36364            | 0.09091       | 0.30198                 | 0.41089            | 0.28713       |
|               | 55-59         | 0.28571                 | 0.42857            | 0.28571       | 0.30220                 | 0.42857            | 0.26923       |
|               | Department 66 | 0-4                     | 0.85294            | 0.11765       | 0.02941                 | 0.76000            | 0.14667       |
| 5-9           |               | 0.85294                 | 0.11765            | 0.02941       | 0.70769                 | 0.16923            | 0.12308       |
| 10-14         |               | 0.88235                 | 0.09804            | 0.01961       | 0.76389                 | 0.17593            | 0.06019       |
| 15-19         |               | 0.88406                 | 0.11594            | 0.00000       | 0.84519                 | 0.12552            | 0.02929       |
| 20-24         |               | 0.77778                 | 0.13889            | 0.08333       | 0.72527                 | 0.24176            | 0.03297       |
| 25-29         |               | 0.61404                 | 0.33333            | 0.05263       | 0.54658                 | 0.34161            | 0.11180       |
| 30-34         |               | 0.43902                 | 0.41463            | 0.14634       | 0.52500                 | 0.35000            | 0.12500       |
| 35-39         |               | 0.46939                 | 0.42857            | 0.10204       | 0.43750                 | 0.38889            | 0.17361       |
| 40-44         |               | 0.44000                 | 0.34000            | 0.22000       | 0.40394                 | 0.44335            | 0.15271       |
| 45-49         |               | 0.46000                 | 0.42000            | 0.12000       | 0.32203                 | 0.47458            | 0.20339       |
| 50-54         |               | 0.56522                 | 0.32609            | 0.10870       | 0.32500                 | 0.50000            | 0.17500       |
| 55-59         |               | 0.55556                 | 0.25926            | 0.18519       | 0.30935                 | 0.43885            | 0.25180       |
| Department 73 |               | 0-4                     | 0.70769            | 0.20000       | 0.09231                 | 0.64646            | 0.25253       |
|               | 5-9           | 0.82609                 | 0.17391            | 0.00000       | 0.74603                 | 0.19841            | 0.05556       |
|               | 10-14         | 0.88889                 | 0.11111            | 0.00000       | 0.75000                 | 0.19853            | 0.05147       |
|               | 15-19         | 0.80769                 | 0.19231            | 0.00000       | 0.81967                 | 0.11475            | 0.06557       |
|               | 20-24         | 0.68966                 | 0.20690            | 0.10345       | 0.66250                 | 0.23750            | 0.10000       |
|               | 25-29         | 0.70370                 | 0.25926            | 0.03704       | 0.50588                 | 0.35294            | 0.14118       |
|               | 30-34         | 0.53333                 | 0.43333            | 0.03333       | 0.32432                 | 0.36486            | 0.31081       |
|               | 35-39         | 0.42105                 | 0.42105            | 0.15789       | 0.35849                 | 0.33962            | 0.30189       |
|               | 40-44         | 0.52941                 | 0.17647            | 0.29412       | 0.32979                 | 0.53191            | 0.13830       |
|               | 45-49         | 0.29412                 | 0.58824            | 0.11765       | 0.20000                 | 0.46316            | 0.33684       |
|               | 50-54         | 0.26667                 | 0.53333            | 0.20000       | 0.17045                 | 0.44318            | 0.38636       |
|               | 55-59         | 0.45455                 | 0.27273            | 0.27273       | 0.19718                 | 0.46479            | 0.33803       |

**Table 81. Mortality rates and population size by age group at the department level without segregate by socioeconomic status (Central region) †**

| Departments   | Age group | Mortality rates (R) (%/year) | Not-overweight population in 2005 (Number of people)1 | Overweight population in 2005 (Number of people)2 | Obese population in 2005 (Number of people)3 |
|---------------|-----------|------------------------------|-------------------------------------------------------|---------------------------------------------------|----------------------------------------------|
| Department 5  | 0-4       | 0.00274                      | 313033                                                | 41141                                             | 19676                                        |
|               | 5-9       | 0.00027                      | 330678                                                | 43461                                             | 20785                                        |
|               | 10-14     | 0.00029                      | 352571                                                | 47009                                             | 21697                                        |
|               | 15-19     | 0.00091                      | 359035                                                | 48147                                             | 6878                                         |
|               | 20-24     | 0.00172                      | 298127                                                | 62110                                             | 17200                                        |
|               | 25-29     | 0.00166                      | 237491                                                | 81966                                             | 23119                                        |
|               | 30-34     | 0.00160                      | 168734                                                | 101673                                            | 34612                                        |
|               | 35-39     | 0.00179                      | 152801                                                | 131113                                            | 43376                                        |
|               | 40-44     | 0.00203                      | 168341                                                | 111207                                            | 41830                                        |
|               | 45-49     | 0.00307                      | 118544                                                | 104800                                            | 46387                                        |
|               | 50-54     | 0.00449                      | 85783                                                 | 84899                                             | 42450                                        |
|               | 55-59     | 0.00687                      | 65323                                                 | 64403                                             | 33122                                        |
| Department 17 | 0-4       | 0.00272                      | 10355                                                 | 2190                                              | 1892                                         |
|               | 5-9       | 0.00040                      | 8204                                                  | 1026                                              | 128                                          |
|               | 10-14     | 0.00024                      | 5073                                                  | 1060                                              | 76                                           |
|               | 15-19     | 0.00143                      | 8998                                                  | 782                                               | 391                                          |
|               | 20-24     | 0.00266                      | 6387                                                  | 1249                                              | 432                                          |
|               | 25-29     | 0.00229                      | 7836                                                  | 1711                                              | 901                                          |
|               | 30-34     | 0.00277                      | 4181                                                  | 1921                                              | 621                                          |
|               | 35-39     | 0.00248                      | 3637                                                  | 2261                                              | 885                                          |
|               | 40-44     | 0.00277                      | 1027                                                  | 1264                                              | 296                                          |
|               | 45-49     | 0.00360                      | 2766                                                  | 2646                                              | 1203                                         |
|               | 50-54     | 0.00511                      | 1434                                                  | 2376                                              | 807                                          |
|               | 55-59     | 0.00835                      | 2174                                                  | 2002                                              | 1602                                         |
| Department 18 | 0-4       | 0.00441                      | 22523                                                 | 4774                                              | 612                                          |
|               | 5-9       | 0.00029                      | 22289                                                 | 3955                                              | 1079                                         |
|               | 10-14     | 0.00030                      | 22984                                                 | 2727                                              | 779                                          |
|               | 15-19     | 0.00125                      | 20161                                                 | 3688                                              | 983                                          |
|               | 20-24     | 0.00239                      | 16251                                                 | 2730                                              | 1950                                         |
|               | 25-29     | 0.00378                      | 12118                                                 | 4088                                              | 2044                                         |
|               | 30-34     | 0.00310                      | 7959                                                  | 4776                                              | 3051                                         |
|               | 35-39     | 0.00213                      | 5832                                                  | 5285                                              | 4374                                         |
|               | 40-44     | 0.00341                      | 5454                                                  | 4813                                              | 3208                                         |
|               | 45-49     | 0.00291                      | 3321                                                  | 3875                                              | 3459                                         |
|               | 50-54     | 0.00529                      | 1926                                                  | 3740                                              | 2833                                         |
|               | 55-59     | 0.00910                      | 2170                                                  | 2170                                              | 2034                                         |
| Department 41 | 0-4       | 0.00354                      | 18555                                                 | 2274                                              | 455                                          |
|               | 5-9       | 0.00027                      | 15103                                                 | 2568                                              | 604                                          |
|               | 10-14     | 0.00039                      | 12900                                                 | 1947                                              | 487                                          |
|               | 15-19     | 0.00111                      | 10406                                                 | 1076                                              | 215                                          |
|               | 20-24     | 0.00165                      | 6043                                                  | 1171                                              | 378                                          |
|               | 25-29     | 0.00183                      | 7270                                                  | 2491                                              | 1077                                         |
|               | 30-34     | 0.00200                      | 5049                                                  | 4081                                              | 1107                                         |
|               | 35-39     | 0.00232                      | 4631                                                  | 3741                                              | 1306                                         |

| Departments   | Age group     | Mortality rates (R) (%/year) | Not-overweight population in 2005 (Number of people) <sup>1</sup> | Overweight population in 2005 (Number of people) <sup>2</sup> | Obese population in 2005 (Number of people) <sup>3</sup> |
|---------------|---------------|------------------------------|-------------------------------------------------------------------|---------------------------------------------------------------|----------------------------------------------------------|
|               | 40-44         | 0.00257                      | 2634                                                              | 2634                                                          | 1044                                                     |
|               | 45-49         | 0.00325                      | 1567                                                              | 2229                                                          | 906                                                      |
|               | 50-54         | 0.00462                      | 1450                                                              | 2248                                                          | 798                                                      |
|               | 55-59         | 0.00735                      | 577                                                               | 742                                                           | 350                                                      |
| Department 63 | 0-4           | 0.00254                      | 29774                                                             | 6749                                                          | 2382                                                     |
|               | 5-9           | 0.00026                      | 32091                                                             | 8306                                                          | 1888                                                     |
|               | 10-14         | 0.00020                      | 38770                                                             | 5816                                                          | 775                                                      |
|               | 15-19         | 0.00127                      | 37171                                                             | 2478                                                          | 1377                                                     |
|               | 20-24         | 0.00218                      | 29989                                                             | 5623                                                          | 1093                                                     |
|               | 25-29         | 0.00192                      | 22264                                                             | 9584                                                          | 2064                                                     |
|               | 30-34         | 0.00218                      | 18734                                                             | 10304                                                         | 2623                                                     |
|               | 35-39         | 0.00295                      | 17555                                                             | 12255                                                         | 4471                                                     |
|               | 40-44         | 0.00288                      | 17667                                                             | 9887                                                          | 6159                                                     |
|               | 45-49         | 0.00379                      | 12311                                                             | 12169                                                         | 5094                                                     |
|               | 50-54         | 0.00557                      | 9258                                                              | 10901                                                         | 4778                                                     |
|               | 55-59         | 0.00799                      | 5967                                                              | 9315                                                          | 4366                                                     |
|               | Department 66 | 0-4                          | 0.00305                                                           | 43510                                                         | 10360                                                    |
| 5-9           |               | 0.00038                      | 52740                                                             | 6511                                                          | 3256                                                     |
| 10-14         |               | 0.00029                      | 54062                                                             | 9230                                                          | 3296                                                     |
| 15-19         |               | 0.00177                      | 55410                                                             | 6013                                                          | 1289                                                     |
| 20-24         |               | 0.00316                      | 46481                                                             | 9960                                                          | 3018                                                     |
| 25-29         |               | 0.00291                      | 36477                                                             | 14414                                                         | 3824                                                     |
| 30-34         |               | 0.00349                      | 25721                                                             | 15765                                                         | 6638                                                     |
| 35-39         |               | 0.00260                      | 27832                                                             | 16235                                                         | 6668                                                     |
| 40-44         |               | 0.00295                      | 19870                                                             | 22310                                                         | 7669                                                     |
| 45-49         |               | 0.00403                      | 16641                                                             | 16923                                                         | 10154                                                    |
| 50-54         |               | 0.00560                      | 12491                                                             | 12491                                                         | 11428                                                    |
| 55-59         |               | 0.00803                      | 8113                                                              | 12930                                                         | 6845                                                     |
| Department 73 |               | 0-4                          | 0.00309                                                           | 56623                                                         | 20306                                                    |
|               | 5-9           | 0.00032                      | 70476                                                             | 14238                                                         | 4983                                                     |
|               | 10-14         | 0.00027                      | 71019                                                             | 14694                                                         | 7347                                                     |
|               | 15-19         | 0.00083                      | 68411                                                             | 16011                                                         | 2183                                                     |
|               | 20-24         | 0.00197                      | 47268                                                             | 15193                                                         | 5064                                                     |
|               | 25-29         | 0.00165                      | 35075                                                             | 21135                                                         | 6296                                                     |
|               | 30-34         | 0.00171                      | 28379                                                             | 23956                                                         | 6265                                                     |
|               | 35-39         | 0.00185                      | 25168                                                             | 25168                                                         | 11325                                                    |
|               | 40-44         | 0.00256                      | 21033                                                             | 28194                                                         | 12978                                                    |
|               | 45-49         | 0.00339                      | 12616                                                             | 24049                                                         | 16164                                                    |
|               | 50-54         | 0.00497                      | 11802                                                             | 19276                                                         | 12982                                                    |
|               | 55-59         | 0.00686                      | 8816                                                              | 15428                                                         | 11020                                                    |

<sup>†</sup>Values used in this table are for the urban population

<sup>1</sup> Initial value used in the stock of not-overweight population in 2005.

<sup>2</sup> Initial value used in the stock of overweight population in 2005.

<sup>3</sup> Initial value used in the stock of obese population in 2005.

**Table 82. Mortality rates and population size by age group at the department level for the lower socioeconomic status population (Central region) <sup>†</sup>**

| Departments   | Age group | Mortality rates (R) (%/year) | Not-overweight population in 2005 (Number of people)1 | Overweight population in 2005 (Number of people)2 | Obese population in 2005 (Number of people)3 |
|---------------|-----------|------------------------------|-------------------------------------------------------|---------------------------------------------------|----------------------------------------------|
| Department 5  | 0-4       | 0.00274                      | 51874                                                 | 7155                                              | 1789                                         |
|               | 5-9       | 0.00027                      | 54798                                                 | 7558                                              | 1890                                         |
|               | 10-14     | 0.00029                      | 81363                                                 | 9040                                              | 1808                                         |
|               | 15-19     | 0.00091                      | 82005                                                 | 10755                                             | 0                                            |
|               | 20-24     | 0.00172                      | 53510                                                 | 9555                                              | 5733                                         |
|               | 25-29     | 0.00166                      | 36780                                                 | 19966                                             | 3153                                         |
|               | 30-34     | 0.00160                      | 19469                                                 | 18388                                             | 6490                                         |
|               | 35-39     | 0.00179                      | 22674                                                 | 20702                                             | 4929                                         |
|               | 40-44     | 0.00203                      | 22445                                                 | 17344                                             | 11223                                        |
|               | 45-49     | 0.00307                      | 19757                                                 | 18039                                             | 5154                                         |
|               | 50-54     | 0.00449                      | 22993                                                 | 13265                                             | 4422                                         |
| Department 17 | 0-4       | 0.00272                      | 9878                                                  | 4179                                              | 380                                          |
|               | 5-9       | 0.00040                      | 8578                                                  | 780                                               | 0                                            |
|               | 10-14     | 0.00024                      | 4657                                                  | 1552                                              | 0                                            |
|               | 15-19     | 0.00143                      | 9536                                                  | 636                                               | 0                                            |
|               | 20-24     | 0.00266                      | 6131                                                  | 1613                                              | 323                                          |
|               | 25-29     | 0.00229                      | 8776                                                  | 1254                                              | 418                                          |
|               | 30-34     | 0.00277                      | 4109                                                  | 1868                                              | 747                                          |
|               | 35-39     | 0.00248                      | 4284                                                  | 1785                                              | 714                                          |
|               | 40-44     | 0.00277                      | 370                                                   | 1479                                              | 739                                          |
|               | 45-49     | 0.00360                      | 3705                                                  | 2646                                              | 265                                          |
|               | 50-54     | 0.00511                      | 2131                                                  | 1776                                              | 710                                          |
| Department 18 | 0-4       | 0.00835                      | 2167                                                  | 2167                                              | 1444                                         |
|               | 5-9       | 0.00441                      | 8569                                                  | 2203                                              | 245                                          |
|               | 10-14     | 0.00029                      | 6112                                                  | 1438                                              | 360                                          |
|               | 15-19     | 0.00030                      | 8181                                                  | 1169                                              | 390                                          |
|               | 20-24     | 0.00125                      | 4917                                                  | 1475                                              | 246                                          |
|               | 25-29     | 0.00239                      | 5720                                                  | 390                                               | 390                                          |
|               | 30-34     | 0.00378                      | 3066                                                  | 1022                                              | 292                                          |
|               | 35-39     | 0.00310                      | 2255                                                  | 1459                                              | 531                                          |
|               | 40-44     | 0.00213                      | 911                                                   | 2187                                              | 1458                                         |
|               | 45-49     | 0.00341                      | 963                                                   | 1444                                              | 481                                          |
|               | 50-54     | 0.00291                      | 969                                                   | 554                                               | 277                                          |
| Department 41 | 0-4       | 0.00529                      | 793                                                   | 907                                               | 567                                          |
|               | 5-9       | 0.00910                      | 949                                                   | 678                                               | 271                                          |
|               | 10-14     | 0.00354                      | 13426                                                 | 3794                                              | 1751                                         |
|               | 15-19     | 0.00027                      | 10104                                                 | 2127                                              | 0                                            |
| Department 41 | 10-14     | 0.00039                      | 9351                                                  | 1169                                              | 0                                            |
|               | 15-19     | 0.00111                      | 10515                                                 | 2504                                              | 0                                            |

| Departments   | Age group     | Mortality rates (R) (%/year) | Not-overweight population in 2005 (Number of people)1 | Overweight population in 2005 (Number of people)2 | Obese population in 2005 (Number of people)3 |
|---------------|---------------|------------------------------|-------------------------------------------------------|---------------------------------------------------|----------------------------------------------|
|               | 20-24         | 0.00165                      | 6577                                                  | 1973                                              | 987                                          |
|               | 25-29         | 0.00183                      | 6277                                                  | 2312                                              | 330                                          |
|               | 30-34         | 0.00200                      | 4120                                                  | 3348                                              | 258                                          |
|               | 35-39         | 0.00232                      | 2201                                                  | 2201                                              | 826                                          |
|               | 40-44         | 0.00257                      | 2470                                                  | 823                                               | 1372                                         |
|               | 45-49         | 0.00325                      | 1184                                                  | 2369                                              | 474                                          |
|               | 50-54         | 0.00462                      | 905                                                   | 1810                                              | 679                                          |
|               | 55-59         | 0.00735                      | 1207                                                  | 724                                               | 724                                          |
| Department 63 | 0-4           | 0.00254                      | 12137                                                 | 665                                               | 333                                          |
|               | 5-9           | 0.00026                      | 10134                                                 | 1398                                              | 0                                            |
|               | 10-14         | 0.00020                      | 10080                                                 | 360                                               | 0                                            |
|               | 15-19         | 0.00127                      | 7047                                                  | 1007                                              | 0                                            |
|               | 20-24         | 0.00218                      | 4748                                                  | 548                                               | 0                                            |
|               | 25-29         | 0.00192                      | 5055                                                  | 1896                                              | 1053                                         |
|               | 30-34         | 0.00218                      | 4706                                                  | 2781                                              | 428                                          |
|               | 35-39         | 0.00295                      | 4837                                                  | 2313                                              | 1052                                         |
|               | 40-44         | 0.00288                      | 2425                                                  | 1455                                              | 1698                                         |
|               | 45-49         | 0.00379                      | 1972                                                  | 1972                                              | 438                                          |
|               | 50-54         | 0.00557                      | 2413                                                  | 1609                                              | 402                                          |
|               | 55-59         | 0.00799                      | 485                                                   | 728                                               | 485                                          |
|               | Department 66 | 0-4                          | 0.00305                                               | 17775                                             | 974                                          |
| 5-9           |               | 0.00038                      | 14981                                                 | 2066                                              | 0                                            |
| 10-14         |               | 0.00029                      | 14797                                                 | 528                                               | 0                                            |
| 15-19         |               | 0.00177                      | 10773                                                 | 1539                                              | 0                                            |
| 20-24         |               | 0.00316                      | 7691                                                  | 887                                               | 0                                            |
| 25-29         |               | 0.00291                      | 8156                                                  | 3059                                              | 1699                                         |
| 30-34         |               | 0.00349                      | 7154                                                  | 4227                                              | 650                                          |
| 35-39         |               | 0.00260                      | 7159                                                  | 3424                                              | 1556                                         |
| 40-44         |               | 0.00295                      | 3586                                                  | 2152                                              | 2510                                         |
| 45-49         |               | 0.00403                      | 2915                                                  | 2915                                              | 648                                          |
| 50-54         |               | 0.00560                      | 3524                                                  | 2349                                              | 587                                          |
| 55-59         |               | 0.00803                      | 689                                                   | 1033                                              | 689                                          |
| Department 73 |               | 0-4                          | 0.00309                                               | 17963                                             | 5077                                         |
|               | 5-9           | 0.00032                      | 13526                                                 | 2848                                              | 0                                            |
|               | 10-14         | 0.00027                      | 13061                                                 | 1633                                              | 0                                            |
|               | 15-19         | 0.00083                      | 15283                                                 | 3639                                              | 0                                            |
|               | 20-24         | 0.00197                      | 8441                                                  | 2532                                              | 1266                                         |
|               | 25-29         | 0.00165                      | 8544                                                  | 3148                                              | 450                                          |
|               | 30-34         | 0.00171                      | 5897                                                  | 4791                                              | 369                                          |
|               | 35-39         | 0.00185                      | 3356                                                  | 3356                                              | 1258                                         |
|               | 40-44         | 0.00256                      | 4028                                                  | 1343                                              | 2238                                         |
|               | 45-49         | 0.00339                      | 1971                                                  | 3942                                              | 788                                          |
|               | 50-54         | 0.00497                      | 1574                                                  | 3147                                              | 1180                                         |

| Departments | Age group | Mortality rates (R) (%/year) | Not-overweight population in 2005 (Number of people)1 | Overweight population in 2005 (Number of people)2 | Obese population in 2005 (Number of people)3 |
|-------------|-----------|------------------------------|-------------------------------------------------------|---------------------------------------------------|----------------------------------------------|
|             | 55-59     | 0.00686                      | 2204                                                  | 1322                                              | 1322                                         |

†Values used in this table are for the urban population

<sup>1</sup> Initial value used in the stock of not-overweight population in 2005 for lower SES.

<sup>2</sup> Initial value used in the stock of overweight population in 2005 for lower SES.

<sup>3</sup> Initial value used in the stock of obese population in 2005 for lower SES.

**Table 83. Mortality rates and population size by age group at the department level for the middle socioeconomic status population (Central region) †**

| Departments   | Age group | Mortality rates (R) (%/year) | Not-overweight population in 2005 (Number of people)1 | Overweight population in 2005 (Number of people)2 | Obese population in 2005 (Number of people)3 |
|---------------|-----------|------------------------------|-------------------------------------------------------|---------------------------------------------------|----------------------------------------------|
| Department 5  | 0-4       | 0.00274                      | 70183                                                 | 9680                                              | 2420                                         |
|               | 5-9       | 0.00027                      | 74139                                                 | 10226                                             | 2557                                         |
|               | 10-14     | 0.00029                      | 90935                                                 | 10104                                             | 2021                                         |
|               | 15-19     | 0.00091                      | 79628                                                 | 10443                                             | 0                                            |
|               | 20-24     | 0.00172                      | 68374                                                 | 12210                                             | 7326                                         |
|               | 25-29     | 0.00166                      | 44523                                                 | 24169                                             | 3816                                         |
|               | 30-34     | 0.00160                      | 26592                                                 | 25115                                             | 8864                                         |
|               | 35-39     | 0.00179                      | 31928                                                 | 29152                                             | 6941                                         |
|               | 40-44     | 0.00203                      | 27832                                                 | 21507                                             | 13916                                        |
|               | 45-49     | 0.00307                      | 26870                                                 | 24533                                             | 7010                                         |
|               | 50-54     | 0.00449                      | 23993                                                 | 13842                                             | 4614                                         |
|               | 55-59     | 0.00687                      | 15334                                                 | 7156                                              | 5111                                         |
| Department 17 | 0-4       | 0.00272                      | 13677                                                 | 3039                                              | 3039                                         |
|               | 5-9       | 0.00040                      | 16377                                                 | 3119                                              | 0                                            |
|               | 10-14     | 0.00024                      | 17851                                                 | 3881                                              | 0                                            |
|               | 15-19     | 0.00143                      | 13987                                                 | 1272                                              | 636                                          |
|               | 20-24     | 0.00266                      | 12585                                                 | 1613                                              | 645                                          |
|               | 25-29     | 0.00229                      | 9612                                                  | 2507                                              | 836                                          |
|               | 30-34     | 0.00277                      | 7844                                                  | 3735                                              | 747                                          |
|               | 35-39     | 0.00248                      | 6426                                                  | 5712                                              | 714                                          |
|               | 40-44     | 0.00277                      | 3697                                                  | 5916                                              | 1109                                         |
|               | 45-49     | 0.00360                      | 3705                                                  | 4763                                              | 794                                          |
|               | 50-54     | 0.00511                      | 2131                                                  | 3552                                              | 2486                                         |
|               | 55-59     | 0.00835                      | 1376                                                  | 1376                                              | 275                                          |
| Department 18 | 0-4       | 0.00441                      | 7521                                                  | 1934                                              | 215                                          |
|               | 5-9       | 0.00029                      | 5834                                                  | 1373                                              | 343                                          |
|               | 10-14     | 0.00030                      | 8835                                                  | 1262                                              | 421                                          |
|               | 15-19     | 0.00125                      | 8014                                                  | 2404                                              | 401                                          |
|               | 20-24     | 0.00239                      | 6178                                                  | 421                                               | 421                                          |
|               | 25-29     | 0.00378                      | 4803                                                  | 1601                                              | 457                                          |
|               | 30-34     | 0.00310                      | 2537                                                  | 1642                                              | 597                                          |

| Departments   | Age group     | Mortality rates (R) (%/year) | Not-overweight population in 2005 (Number of people)1 | Overweight population in 2005 (Number of people)2 | Obese population in 2005 (Number of people)3 |
|---------------|---------------|------------------------------|-------------------------------------------------------|---------------------------------------------------|----------------------------------------------|
|               | 35-39         | 0.00213                      | 948                                                   | 2274                                              | 1516                                         |
|               | 40-44         | 0.00341                      | 1658                                                  | 2486                                              | 829                                          |
|               | 45-49         | 0.00291                      | 2757                                                  | 1575                                              | 788                                          |
|               | 50-54         | 0.00529                      | 833                                                   | 952                                               | 595                                          |
|               | 55-59         | 0.00910                      | 1424                                                  | 1017                                              | 407                                          |
| Department 41 | 0-4           | 0.00354                      | 17557                                                 | 4962                                              | 2290                                         |
|               | 5-9           | 0.00027                      | 25481                                                 | 5364                                              | 0                                            |
|               | 10-14         | 0.00039                      | 24935                                                 | 3117                                              | 0                                            |
|               | 15-19         | 0.00111                      | 14559                                                 | 3467                                              | 0                                            |
|               | 20-24         | 0.00165                      | 13608                                                 | 4082                                              | 2041                                         |
|               | 25-29         | 0.00183                      | 13948                                                 | 5139                                              | 734                                          |
|               | 30-34         | 0.00200                      | 8378                                                  | 6807                                              | 524                                          |
|               | 35-39         | 0.00232                      | 6025                                                  | 6025                                              | 2259                                         |
|               | 40-44         | 0.00257                      | 8136                                                  | 2712                                              | 4520                                         |
|               | 45-49         | 0.00325                      | 3274                                                  | 6548                                              | 1310                                         |
|               | 50-54         | 0.00462                      | 2474                                                  | 4948                                              | 1855                                         |
|               | 55-59         | 0.00735                      | 2853                                                  | 1712                                              | 1712                                         |
|               | Department 63 | 0-4                          | 0.00254                                               | 11522                                             | 631                                          |
| 5-9           |               | 0.00026                      | 11977                                                 | 1652                                              | 0                                            |
| 10-14         |               | 0.00020                      | 17727                                                 | 633                                               | 0                                            |
| 15-19         |               | 0.00127                      | 15196                                                 | 2171                                              | 0                                            |
| 20-24         |               | 0.00218                      | 12115                                                 | 1398                                              | 0                                            |
| 25-29         |               | 0.00192                      | 6918                                                  | 2594                                              | 1441                                         |
| 30-34         |               | 0.00218                      | 6105                                                  | 3608                                              | 555                                          |
| 35-39         |               | 0.00295                      | 7566                                                  | 3618                                              | 1645                                         |
| 40-44         |               | 0.00288                      | 4324                                                  | 2594                                              | 3027                                         |
| 45-49         |               | 0.00379                      | 4239                                                  | 4239                                              | 942                                          |
| 50-54         |               | 0.00557                      | 3291                                                  | 2194                                              | 548                                          |
| 55-59         |               | 0.00799                      | 1594                                                  | 2391                                              | 1594                                         |
| Department 66 |               | 0-4                          | 0.00305                                               | 15577                                             | 2148                                         |
|               | 5-9           | 0.00038                      | 17184                                                 | 2370                                              | 593                                          |
|               | 10-14         | 0.00029                      | 23781                                                 | 2642                                              | 528                                          |
|               | 15-19         | 0.00177                      | 23469                                                 | 3078                                              | 0                                            |
|               | 20-24         | 0.00316                      | 17026                                                 | 3040                                              | 1824                                         |
|               | 25-29         | 0.00291                      | 10851                                                 | 5891                                              | 930                                          |
|               | 30-34         | 0.00349                      | 6852                                                  | 6472                                              | 2284                                         |
|               | 35-39         | 0.00260                      | 8912                                                  | 8137                                              | 1937                                         |
|               | 40-44         | 0.00295                      | 6470                                                  | 4999                                              | 3235                                         |
|               | 45-49         | 0.00403                      | 6406                                                  | 5849                                              | 1671                                         |
|               | 50-54         | 0.00560                      | 4979                                                  | 2873                                              | 958                                          |
|               | 55-59         | 0.00803                      | 4399                                                  | 2053                                              | 1466                                         |
|               | Department 73 | 0-4                          | 0.00309                                               | 23490                                             | 6639                                         |
| 5-9           |               | 0.00032                      | 34108                                                 | 7181                                              | 0                                            |
| 10-14         |               | 0.00027                      | 34829                                                 | 4354                                              | 0                                            |



| Departments | Age group | Mortality rates (R) (%/year) | Not-overweight population in 2005 (Number of people) <sup>1</sup> | Overweight population in 2005 (Number of people) <sup>2</sup> | Obese population in 2005 (Number of people) <sup>3</sup> |
|-------------|-----------|------------------------------|-------------------------------------------------------------------|---------------------------------------------------------------|----------------------------------------------------------|
|             | 15-19     | 0.00083                      | 21162                                                             | 5038                                                          | 0                                                        |
|             | 20-24     | 0.00197                      | 17463                                                             | 5239                                                          | 2620                                                     |
|             | 25-29     | 0.00165                      | 18987                                                             | 6995                                                          | 999                                                      |
|             | 30-34     | 0.00171                      | 11990                                                             | 9742                                                          | 749                                                      |
|             | 35-39     | 0.00185                      | 9184                                                              | 9184                                                          | 3444                                                     |
|             | 40-44     | 0.00256                      | 13268                                                             | 4423                                                          | 7371                                                     |
|             | 45-49     | 0.00339                      | 5450                                                              | 10900                                                         | 2180                                                     |
|             | 50-54     | 0.00497                      | 4301                                                              | 8602                                                          | 3226                                                     |
|             | 55-59     | 0.00686                      | 5209                                                              | 3126                                                          | 3126                                                     |

†Values used in this table are for the urban population

1 Initial value used in the stock of not-overweight population in 2005 for middle SES.

2 Initial value used in the stock of overweight population in 2005 for middle SES.

3 Initial value used in the stock of obese population in 2005 for middle SES.

**Table 84. Mortality rates and population size by age group at the department level for the higher socioeconomic status population (Central region) †**

| Departments   | Age group | Mortality rates (R) (%/year) | Not-overweight population in 2005 (Number of people) <sup>1</sup> | Overweight population in 2005 (Number of people) <sup>2</sup> | Obese population in 2005 (Number of people) <sup>3</sup> |
|---------------|-----------|------------------------------|-------------------------------------------------------------------|---------------------------------------------------------------|----------------------------------------------------------|
| Department 5  | 0-4       | 0.00274                      | 196816                                                            | 27147                                                         | 6787                                                     |
|               | 5-9       | 0.00027                      | 207910                                                            | 28677                                                         | 7169                                                     |
|               | 10-14     | 0.00029                      | 199418                                                            | 22158                                                         | 4432                                                     |
|               | 15-19     | 0.00091                      | 204419                                                            | 26809                                                         | 0                                                        |
|               | 20-24     | 0.00172                      | 171678                                                            | 30657                                                         | 18394                                                    |
|               | 25-29     | 0.00166                      | 129051                                                            | 70056                                                         | 11062                                                    |
|               | 30-34     | 0.00160                      | 87850                                                             | 82969                                                         | 29283                                                    |
|               | 35-39     | 0.00179                      | 99024                                                             | 90413                                                         | 21527                                                    |
|               | 40-44     | 0.00203                      | 91129                                                             | 70417                                                         | 45564                                                    |
|               | 45-49     | 0.00307                      | 77449                                                             | 70714                                                         | 20204                                                    |
|               | 50-54     | 0.00449                      | 73479                                                             | 42392                                                         | 14131                                                    |
|               | 55-59     | 0.00687                      | 61336                                                             | 28624                                                         | 20445                                                    |
| Department 17 | 0-4       | 0.00272                      | 15957                                                             | 1140                                                          | 3799                                                     |
|               | 5-9       | 0.00040                      | 24955                                                             | 2340                                                          | 780                                                      |
|               | 10-14     | 0.00024                      | 29493                                                             | 5433                                                          | 776                                                      |
|               | 15-19     | 0.00143                      | 37510                                                             | 3179                                                          | 1907                                                     |
|               | 20-24     | 0.00266                      | 24202                                                             | 5163                                                          | 1936                                                     |
|               | 25-29     | 0.00229                      | 17970                                                             | 4179                                                          | 2925                                                     |
|               | 30-34     | 0.00277                      | 15688                                                             | 7097                                                          | 2615                                                     |
|               | 35-39     | 0.00248                      | 15708                                                             | 8925                                                          | 4998                                                     |
|               | 40-44     | 0.00277                      | 15160                                                             | 16269                                                         | 3697                                                     |
|               | 45-49     | 0.00360                      | 10849                                                             | 10055                                                         | 6880                                                     |
|               | 50-54     | 0.00511                      | 7103                                                              | 13497                                                         | 3197                                                     |
|               | 55-59     | 0.00835                      | 6053                                                              | 7153                                                          | 5778                                                     |

| Departments   | Age group | Mortality rates (R) (%/year) | Not-overweight population in 2005 (Number of people) <sup>1</sup> | Overweight population in 2005 (Number of people) <sup>2</sup> | Obese population in 2005 (Number of people) <sup>3</sup> |
|---------------|-----------|------------------------------|-------------------------------------------------------------------|---------------------------------------------------------------|----------------------------------------------------------|
| Department 18 | 0-4       | 0.00441                      | 5617                                                              | 1444                                                          | 160                                                      |
|               | 5-9       | 0.00029                      | 9167                                                              | 2157                                                          | 539                                                      |
|               | 10-14     | 0.00030                      | 5236                                                              | 748                                                           | 249                                                      |
|               | 15-19     | 0.00125                      | 5464                                                              | 1639                                                          | 273                                                      |
|               | 20-24     | 0.00239                      | 6521                                                              | 445                                                           | 445                                                      |
|               | 25-29     | 0.00378                      | 4906                                                              | 1635                                                          | 467                                                      |
|               | 30-34     | 0.00310                      | 3594                                                              | 2326                                                          | 846                                                      |
|               | 35-39     | 0.00213                      | 1239                                                              | 2974                                                          | 1983                                                     |
|               | 40-44     | 0.00341                      | 1872                                                              | 2807                                                          | 936                                                      |
|               | 45-49     | 0.00291                      | 2012                                                              | 1150                                                          | 575                                                      |
|               | 50-54     | 0.00529                      | 1349                                                              | 1541                                                          | 963                                                      |
|               | 55-59     | 0.00910                      | 814                                                               | 581                                                           | 232                                                      |
| Department 41 | 0-4       | 0.00354                      | 13633                                                             | 3853                                                          | 1778                                                     |
|               | 5-9       | 0.00027                      | 19769                                                             | 4162                                                          | 0                                                        |
|               | 10-14     | 0.00039                      | 24935                                                             | 3117                                                          | 0                                                        |
|               | 15-19     | 0.00111                      | 23053                                                             | 5489                                                          | 0                                                        |
|               | 20-24     | 0.00165                      | 16103                                                             | 4831                                                          | 2415                                                     |
|               | 25-29     | 0.00183                      | 12088                                                             | 4454                                                          | 636                                                      |
|               | 30-34     | 0.00200                      | 9340                                                              | 7589                                                          | 584                                                      |
|               | 35-39     | 0.00232                      | 8805                                                              | 8805                                                          | 3302                                                     |
|               | 40-44     | 0.00257                      | 9588                                                              | 3196                                                          | 5327                                                     |
|               | 45-49     | 0.00325                      | 4876                                                              | 9753                                                          | 1951                                                     |
|               | 50-54     | 0.00462                      | 3379                                                              | 6758                                                          | 2534                                                     |
|               | 55-59     | 0.00735                      | 4718                                                              | 2831                                                          | 2831                                                     |
| Department 63 | 0-4       | 0.00254                      | 12291                                                             | 673                                                           | 337                                                      |
|               | 5-9       | 0.00026                      | 15048                                                             | 2076                                                          | 0                                                        |
|               | 10-14     | 0.00020                      | 15989                                                             | 571                                                           | 0                                                        |
|               | 15-19     | 0.00127                      | 13654                                                             | 1951                                                          | 0                                                        |
|               | 20-24     | 0.00218                      | 16045                                                             | 1851                                                          | 0                                                        |
|               | 25-29     | 0.00192                      | 9445                                                              | 3542                                                          | 1968                                                     |
|               | 30-34     | 0.00218                      | 8013                                                              | 4735                                                          | 728                                                      |
|               | 35-39     | 0.00295                      | 7814                                                              | 3737                                                          | 1699                                                     |
|               | 40-44     | 0.00288                      | 7909                                                              | 4745                                                          | 5536                                                     |
|               | 45-49     | 0.00379                      | 7098                                                              | 7098                                                          | 1577                                                     |
|               | 50-54     | 0.00557                      | 7898                                                              | 5265                                                          | 1316                                                     |
|               | 55-59     | 0.00799                      | 3535                                                              | 5302                                                          | 3535                                                     |
| Department 66 | 0-4       | 0.00305                      | 16615                                                             | 2292                                                          | 573                                                      |
|               | 5-9       | 0.00038                      | 21590                                                             | 2978                                                          | 744                                                      |
|               | 10-14     | 0.00029                      | 21450                                                             | 2383                                                          | 477                                                      |
|               | 15-19     | 0.00177                      | 21088                                                             | 2766                                                          | 0                                                        |
|               | 20-24     | 0.00316                      | 22548                                                             | 4026                                                          | 2416                                                     |
|               | 25-29     | 0.00291                      | 14816                                                             | 8043                                                          | 1270                                                     |
|               | 30-34     | 0.00349                      | 8994                                                              | 8494                                                          | 2998                                                     |
|               | 35-39     | 0.00260                      | 9204                                                              | 8404                                                          | 2001                                                     |

| Departments   | Age group | Mortality rates (R) (%/year) | Not-overweight population in 2005 (Number of people) <sup>1</sup> | Overweight population in 2005 (Number of people) <sup>2</sup> | Obese population in 2005 (Number of people) <sup>3</sup> |
|---------------|-----------|------------------------------|-------------------------------------------------------------------|---------------------------------------------------------------|----------------------------------------------------------|
|               | 40-44     | 0.00295                      | 11835                                                             | 9145                                                          | 5917                                                     |
|               | 45-49     | 0.00403                      | 10726                                                             | 9793                                                          | 2798                                                     |
|               | 50-54     | 0.00560                      | 11950                                                             | 6894                                                          | 2298                                                     |
|               | 55-59     | 0.00803                      | 9755                                                              | 4553                                                          | 3252                                                     |
| Department 73 | 0-4       | 0.00309                      | 18239                                                             | 5155                                                          | 2379                                                     |
|               | 5-9       | 0.00032                      | 26463                                                             | 5571                                                          | 0                                                        |
|               | 10-14     | 0.00027                      | 34829                                                             | 4354                                                          | 0                                                        |
|               | 15-19     | 0.00083                      | 33506                                                             | 7978                                                          | 0                                                        |
|               | 20-24     | 0.00197                      | 20665                                                             | 6199                                                          | 3100                                                     |
|               | 25-29     | 0.00165                      | 16455                                                             | 6062                                                          | 866                                                      |
|               | 30-34     | 0.00171                      | 13366                                                             | 10860                                                         | 835                                                      |
|               | 35-39     | 0.00185                      | 13423                                                             | 13423                                                         | 5034                                                     |
|               | 40-44     | 0.00256                      | 15637                                                             | 5212                                                          | 8687                                                     |
|               | 45-49     | 0.00339                      | 8117                                                              | 16233                                                         | 3247                                                     |
|               | 50-54     | 0.00497                      | 5875                                                              | 11749                                                         | 4406                                                     |
|               | 55-59     | 0.00686                      | 8616                                                              | 5169                                                          | 5169                                                     |

<sup>†</sup>Values used in this table are for the urban population

<sup>1</sup> Initial value used in the stock of not-overweight population in 2005 for higher SES.

<sup>2</sup> Initial value used in the stock of overweight population in 2005 for higher SES.

<sup>3</sup> Initial value used in the stock of obese population in 2005 for higher SES.

## 1.4 Pacifica Region

The Pacifica region of Colombia is located in the eastern part of the national territory and consists of four departments, these are:

- Cauca (19)
- Chocó (27)
- Nariño (52)
- Valle Del Cauca (76)

### 1.4.1 Data and model parameters used

**Table 85. Prevalent rates of entire population by age group, gender, and body mass index category in 2005 (Pacifica region)**

| Age Group | Nutritional State Male |           |         | Nutritional State Female |           |         |
|-----------|------------------------|-----------|---------|--------------------------|-----------|---------|
|           | Not-Overweigh          | Overweigh | Obese   | Not-Overweigh            | Overweigh | Obese   |
| 0-4       | 0.78558                | 0.15595   | 0.05848 | 0.75569                  | 0.19048   | 0.05383 |
| 5-9       | 0.81818                | 0.13439   | 0.04743 | 0.80658                  | 0.13169   | 0.06173 |
| 10-14     | 0.83539                | 0.12757   | 0.03704 | 0.82474                  | 0.12027   | 0.05498 |
| 15-19     | 0.89286                | 0.08631   | 0.02083 | 0.78109                  | 0.19154   | 0.02736 |
| 20-24     | 0.79104                | 0.16667   | 0.04229 | 0.76214                  | 0.19741   | 0.04045 |
| 25-29     | 0.62500                | 0.28889   | 0.08611 | 0.59848                  | 0.28598   | 0.11553 |
| 30-34     | 0.53618                | 0.34539   | 0.11842 | 0.49791                  | 0.33682   | 0.16527 |

|       |         |         |         |         |         |         |
|-------|---------|---------|---------|---------|---------|---------|
| 35-39 | 0.48454 | 0.38144 | 0.13402 | 0.42443 | 0.39130 | 0.18427 |
| 40-44 | 0.41852 | 0.43333 | 0.14815 | 0.33781 | 0.41611 | 0.24609 |
| 45-49 | 0.37500 | 0.47321 | 0.15179 | 0.25373 | 0.41791 | 0.32836 |
| 50-54 | 0.44206 | 0.42489 | 0.13305 | 0.27072 | 0.39227 | 0.33702 |
| 55-59 | 0.38194 | 0.47222 | 0.14583 | 0.23551 | 0.36957 | 0.39493 |

**Table 86. Prevalent rates of lower socioeconomic status population by age group, gender, and body mass index category in 2005 (Pacifica region)**

| Age Group | Nutritional State -Male |           |         | Nutritional State -Female |           |         |
|-----------|-------------------------|-----------|---------|---------------------------|-----------|---------|
|           | Not-Overweigh           | Overweigh | Obese   | Not-Overweigh             | Overweigh | Obese   |
| 0-4       | 0.80588                 | 0.13529   | 0.05882 | 0.80952                   | 0.13690   | 0.05357 |
| 5-9       | 0.87324                 | 0.11268   | 0.01408 | 0.90476                   | 0.06349   | 0.03175 |
| 10-14     | 0.91398                 | 0.06452   | 0.02151 | 0.87013                   | 0.12987   | 0.00000 |
| 15-19     | 1.00000                 | 0.00000   | 0.00000 | 0.74528                   | 0.21698   | 0.03774 |
| 20-24     | 0.86325                 | 0.11111   | 0.02564 | 0.73759                   | 0.20567   | 0.05674 |
| 25-29     | 0.76923                 | 0.15385   | 0.07692 | 0.53906                   | 0.31250   | 0.14844 |
| 30-34     | 0.69444                 | 0.19444   | 0.11111 | 0.49091                   | 0.34545   | 0.16364 |
| 35-39     | 0.68056                 | 0.26389   | 0.05556 | 0.44915                   | 0.35593   | 0.19492 |
| 40-44     | 0.56061                 | 0.33333   | 0.10606 | 0.38043                   | 0.36957   | 0.25000 |
| 45-49     | 0.63636                 | 0.25455   | 0.10909 | 0.22500                   | 0.46250   | 0.31250 |
| 50-54     | 0.76087                 | 0.15217   | 0.08696 | 0.27941                   | 0.41176   | 0.30882 |
| 55-59     | 0.64706                 | 0.26471   | 0.08824 | 0.21739                   | 0.43478   | 0.34783 |

**Table 87. Prevalent rates of middle socioeconomic status population by age group, gender, and body mass index category in 2005 (Pacifica region)**

| Age Group | Nutritional State Male |           |         | Nutritional State Female |           |         |
|-----------|------------------------|-----------|---------|--------------------------|-----------|---------|
|           | Not-Overweigh          | Overweigh | Obese   | Not-Overweigh            | Overweigh | Obese   |
| 0-4       | 0.77273                | 0.15152   | 0.07576 | 0.73973                  | 0.22603   | 0.03425 |
| 5-9       | 0.87013                | 0.11688   | 0.01299 | 0.85915                  | 0.11268   | 0.02817 |
| 10-14     | 0.80328                | 0.14754   | 0.04918 | 0.77477                  | 0.13514   | 0.09009 |
| 15-19     | 0.90000                | 0.07778   | 0.02222 | 0.84112                  | 0.14019   | 0.01869 |
| 20-24     | 0.74528                | 0.20755   | 0.04717 | 0.74118                  | 0.21765   | 0.04118 |
| 25-29     | 0.62281                | 0.28070   | 0.09649 | 0.58710                  | 0.30968   | 0.10323 |
| 30-34     | 0.52577                | 0.38144   | 0.09278 | 0.45522                  | 0.35821   | 0.18657 |
| 35-39     | 0.52874                | 0.36782   | 0.10345 | 0.40909                  | 0.32727   | 0.26364 |
| 40-44     | 0.53125                | 0.37500   | 0.09375 | 0.28682                  | 0.39535   | 0.31783 |
| 45-49     | 0.42857                | 0.44643   | 0.12500 | 0.24444                  | 0.36667   | 0.38889 |
| 50-54     | 0.43333                | 0.46667   | 0.10000 | 0.26667                  | 0.41333   | 0.32000 |
| 55-59     | 0.22581                | 0.54839   | 0.22581 | 0.21918                  | 0.31507   | 0.46575 |

**Table 88. Prevalent rates of higher socioeconomic status population by age group, gender, and body mass index category in 2005 (Pacifica region)**

| Age Group | Nutritional State Male |           |         | Nutritional State Female |           |         |
|-----------|------------------------|-----------|---------|--------------------------|-----------|---------|
|           | Not-Overweigh          | Overweigh | Obese   | Not-Overweigh            | Overweigh | Obese   |
| 0-4       | 0.77725                | 0.17536   | 0.04739 | 0.71598                  | 0.21302   | 0.07101 |
| 5-9       | 0.74286                | 0.16190   | 0.09524 | 0.71560                  | 0.18349   | 0.10092 |
| 10-14     | 0.77528                | 0.17978   | 0.04494 | 0.84466                  | 0.09709   | 0.05825 |
| 15-19     | 0.81379                | 0.15172   | 0.03448 | 0.76720                  | 0.20635   | 0.02646 |

|       |         |         |         |         |         |         |
|-------|---------|---------|---------|---------|---------|---------|
| 20-24 | 0.77095 | 0.17877 | 0.05028 | 0.78502 | 0.18241 | 0.03257 |
| 25-29 | 0.55952 | 0.35714 | 0.08333 | 0.63673 | 0.25714 | 0.10612 |
| 30-34 | 0.45926 | 0.40000 | 0.14074 | 0.52564 | 0.32051 | 0.15385 |
| 35-39 | 0.34848 | 0.45455 | 0.19697 | 0.41961 | 0.43529 | 0.14510 |
| 40-44 | 0.30000 | 0.50714 | 0.19286 | 0.34956 | 0.44690 | 0.20354 |
| 45-49 | 0.22124 | 0.59292 | 0.18584 | 0.26724 | 0.42241 | 0.31034 |
| 50-54 | 0.33071 | 0.50394 | 0.16535 | 0.26941 | 0.37900 | 0.35160 |
| 55-59 | 0.32911 | 0.53165 | 0.13924 | 0.24841 | 0.37580 | 0.37580 |

**Table 89. Prevalent rates of entire population by age group, gender, and body mass index category in 2010 (Pacifica region)**

| Age Group | Nutritional State Male |           |         | Nutritional State Female |           |         |
|-----------|------------------------|-----------|---------|--------------------------|-----------|---------|
|           | Not-Overweigh          | Overweigh | Obese   | Not-Overweigh            | Overweigh | Obese   |
| 0-4       | 0.72851                | 0.19236   | 0.07913 | 0.75176                  | 0.19887   | 0.04937 |
| 5-9       | 0.75553                | 0.15848   | 0.08600 | 0.76800                  | 0.16667   | 0.06533 |
| 10-14     | 0.73949                | 0.17407   | 0.08645 | 0.76089                  | 0.18883   | 0.05028 |
| 15-19     | 0.82404                | 0.14746   | 0.02850 | 0.77235                  | 0.17759   | 0.05006 |
| 20-24     | 0.73607                | 0.20000   | 0.06393 | 0.69525                  | 0.22164   | 0.08311 |
| 25-29     | 0.56920                | 0.33723   | 0.09357 | 0.55601                  | 0.30055   | 0.14344 |
| 30-34     | 0.46764                | 0.40501   | 0.12735 | 0.40194                  | 0.40357   | 0.19449 |
| 35-39     | 0.40000                | 0.41772   | 0.18228 | 0.36799                  | 0.37789   | 0.25413 |
| 40-44     | 0.35648                | 0.48148   | 0.16204 | 0.34231                  | 0.41204   | 0.24564 |
| 45-49     | 0.42746                | 0.40933   | 0.16321 | 0.26847                  | 0.39099   | 0.34054 |
| 50-54     | 0.42089                | 0.41139   | 0.16772 | 0.23314                  | 0.38728   | 0.37958 |
| 55-59     | 0.39416                | 0.43796   | 0.16788 | 0.19471                  | 0.42067   | 0.38462 |

**Table 90. Prevalent rates of lower socioeconomic status population by age group, gender, and body mass index category in 2010 (Pacifica region)**

| Age Group | Nutritional State -Male |           |         | Nutritional State -Female |           |         |
|-----------|-------------------------|-----------|---------|---------------------------|-----------|---------|
|           | Not-Overweigh           | Overweigh | Obese   | Not-Overweigh             | Overweigh | Obese   |
| 0-4       | 0.73129                 | 0.22109   | 0.04762 | 0.74747                   | 0.21212   | 0.04040 |
| 5-9       | 0.84112                 | 0.12773   | 0.03115 | 0.82540                   | 0.13016   | 0.04444 |
| 10-14     | 0.79667                 | 0.15000   | 0.05333 | 0.79751                   | 0.15888   | 0.04361 |
| 15-19     | 0.86643                 | 0.11913   | 0.01444 | 0.73958                   | 0.20833   | 0.05208 |
| 20-24     | 0.79439                 | 0.15888   | 0.04673 | 0.64015                   | 0.25379   | 0.10606 |
| 25-29     | 0.61333                 | 0.33333   | 0.05333 | 0.46479                   | 0.31925   | 0.21596 |
| 30-34     | 0.45455                 | 0.40496   | 0.14050 | 0.32927                   | 0.42683   | 0.24390 |
| 35-39     | 0.47009                 | 0.33333   | 0.19658 | 0.33333                   | 0.35948   | 0.30719 |
| 40-44     | 0.48246                 | 0.42982   | 0.08772 | 0.32000                   | 0.38667   | 0.29333 |
| 45-49     | 0.55056                 | 0.30337   | 0.14607 | 0.19697                   | 0.38636   | 0.41667 |
| 50-54     | 0.53409                 | 0.35227   | 0.11364 | 0.30435                   | 0.34783   | 0.34783 |
| 55-59     | 0.47458                 | 0.40678   | 0.11864 | 0.25000                   | 0.37500   | 0.37500 |

**Table 91. Prevalent rates of middle socioeconomic status population by age group, gender, and body mass index category in 2010 (Pacifica region)**

| Age Group | Nutritional State Male | Nutritional State Female |
|-----------|------------------------|--------------------------|
|-----------|------------------------|--------------------------|

|       | Not-Overweigh | Overweigh | Obese   | Not-Overweigh | Overweigh | Obese   |
|-------|---------------|-----------|---------|---------------|-----------|---------|
| 0-4   | 0.71226       | 0.18396   | 0.10377 | 0.73711       | 0.22165   | 0.04124 |
| 5-9   | 0.75983       | 0.17467   | 0.06550 | 0.76923       | 0.14872   | 0.08205 |
| 10-14 | 0.75000       | 0.17672   | 0.07328 | 0.75099       | 0.20158   | 0.04743 |
| 15-19 | 0.82328       | 0.15948   | 0.01724 | 0.78802       | 0.17512   | 0.03687 |
| 20-24 | 0.72185       | 0.21854   | 0.05960 | 0.70918       | 0.21939   | 0.07143 |
| 25-29 | 0.52083       | 0.34028   | 0.13889 | 0.53913       | 0.33043   | 0.13043 |
| 30-34 | 0.52448       | 0.36364   | 0.11189 | 0.41361       | 0.38743   | 0.19895 |
| 35-39 | 0.37615       | 0.49541   | 0.12844 | 0.32065       | 0.39674   | 0.28261 |
| 40-44 | 0.37398       | 0.44715   | 0.17886 | 0.38217       | 0.36943   | 0.24841 |
| 45-49 | 0.40187       | 0.46729   | 0.13084 | 0.24060       | 0.40602   | 0.35338 |
| 50-54 | 0.45588       | 0.35294   | 0.19118 | 0.19708       | 0.32847   | 0.47445 |
| 55-59 | 0.45833       | 0.36111   | 0.18056 | 0.16129       | 0.43011   | 0.40860 |

**Table 92. Prevalent rates of higher socioeconomic status population by age group, gender, and body mass index category in 2010 (Pacifica region)**

| Age Group | Nutritional State Male |           |         | Nutritional State Female |           |         |
|-----------|------------------------|-----------|---------|--------------------------|-----------|---------|
|           | Not-Overweigh          | Overweigh | Obese   | Not-Overweigh            | Overweigh | Obese   |
| 0-4       | 0.65882                | 0.16300   | 0.09692 | 0.77064                  | 0.16055   | 0.06881 |
| 5-9       | 0.66537                | 0.18182   | 0.17045 | 0.69167                  | 0.22917   | 0.07917 |
| 10-14     | 0.71895                | 0.19444   | 0.12654 | 0.73209                  | 0.20872   | 0.05919 |
| 15-19     | 0.82979                | 0.16443   | 0.05034 | 0.79042                  | 0.15269   | 0.05689 |
| 20-24     | 0.75893                | 0.22449   | 0.08163 | 0.73490                  | 0.19463   | 0.07047 |
| 25-29     | 0.64103                | 0.33790   | 0.09132 | 0.63668                  | 0.26298   | 0.10035 |
| 30-34     | 0.54971                | 0.43256   | 0.13023 | 0.43893                  | 0.40076   | 0.16031 |
| 35-39     | 0.45588                | 0.42604   | 0.20710 | 0.42007                  | 0.37546   | 0.20446 |
| 40-44     | 0.37857                | 0.53333   | 0.19487 | 0.33333                  | 0.44444   | 0.22222 |
| 45-49     | 0.53676                | 0.42632   | 0.18947 | 0.31379                  | 0.38621   | 0.30000 |
| 50-54     | 0.47414                | 0.46875   | 0.18750 | 0.22097                  | 0.43446   | 0.34457 |
| 55-59     | 0.48454                | 0.48951   | 0.18182 | 0.18723                  | 0.43404   | 0.37872 |

**Table 93. Fraction of births for men by body mass index category, and socioeconomic status (Pacifica region) †**

| Population group | Lower SES (%/year) | Middle SES (%/year) | Higher SES (%/year) | Complete Urban Population (%/year) |
|------------------|--------------------|---------------------|---------------------|------------------------------------|
| Not-overweight   | 72,41%             | 85,19%              | 76,09%              | 77,45%                             |
| Overweight       | 17,24%             | 7,41%               | 19,57%              | 15,69%                             |
| Obese            | 10,34%             | 7,41%               | 4,35%               | 6,86%                              |

† The fractions of births by each BMI category correspond to the prevalences by BMI category of children aged 0 to 12 months

**Table 94. Fraction of births for women by body mass index category and socioeconomic status (Pacifica region) †**

| Population group | Lower SES (%/year) | Middle SES (%/year) | Higher SES (%/year) | Complete Urban Population (%/year) |
|------------------|--------------------|---------------------|---------------------|------------------------------------|
| Not-overweight   | 84,09%             | 75,00%              | 72,41%              | 78,10%                             |
| Overweight       | 11,36%             | 25,00%              | 27,59%              | 20,00%                             |
| Obese            | 4,55%              | 0,00%               | 0,00%               | 1,90%                              |

† The fractions of births by each BMI category correspond to the prevalences by BMI category of children aged

0 to 12 months

**Table 95. Mortality rates for men and population size by age group without segregate by socioeconomic status (Pacifica region) †**

| Age group | Mortality rates (R) (%/year) Male | Not- overweight men in 2005 (Number of people)1 | Overweight men in 2005 (Number of people)2 | Obese men in 2005 (Number of people)3 |
|-----------|-----------------------------------|-------------------------------------------------|--------------------------------------------|---------------------------------------|
| 0-4       | 0.00307                           | 184596                                          | 36644                                      | 13742                                 |
| 5-9       | 0.00033                           | 203636                                          | 33447                                      | 11805                                 |
| 10-14     | 0.00038                           | 218566                                          | 33377                                      | 9690                                  |
| 15-19     | 0.00275                           | 226037                                          | 21850                                      | 5274                                  |
| 20-24     | 0.00451                           | 176846                                          | 37260                                      | 9454                                  |
| 25-29     | 0.00478                           | 123731                                          | 57191                                      | 17047                                 |
| 30-34     | 0.00447                           | 93277                                           | 60086                                      | 20601                                 |
| 35-39     | 0.00378                           | 84070                                           | 66183                                      | 23254                                 |
| 40-44     | 0.00398                           | 68393                                           | 70814                                      | 24210                                 |
| 45-49     | 0.00447                           | 51185                                           | 64590                                      | 20718                                 |
| 50-54     | 0.00621                           | 48842                                           | 46945                                      | 14700                                 |
| 55-59     | 0.00823                           | 32748                                           | 40488                                      | 12504                                 |

†Values used in this table are for the urban population

1 Initial value used in the stock of not-overweight population in 2005.

2 Initial value used in the stock of overweight population in 2005.

3 Initial value used in the stock of obese population in 2005.

**Table 96. Mortality rates for women and population size by age group without segregate by socioeconomic status (Pacifica region) †**

| Age group | Mortality rates (R) (%/year) | Not- overweight women in 2005 (Number of people)1 | Overweight women in 2005 (Number of people)2 | Obese women in 2005 (Number of people)3 |
|-----------|------------------------------|---------------------------------------------------|----------------------------------------------|-----------------------------------------|
| 0-4       | 0.00252                      | 171187                                            | 43149                                        | 12194                                   |
| 5-9       | 0.00019                      | 194155                                            | 31699                                        | 14859                                   |
| 10-14     | 0.00028                      | 209050                                            | 30486                                        | 13937                                   |
| 15-19     | 0.00059                      | 198205                                            | 48604                                        | 6943                                    |
| 20-24     | 0.00085                      | 181109                                            | 46912                                        | 9613                                    |
| 25-29     | 0.00095                      | 129444                                            | 61855                                        | 24988                                   |
| 30-34     | 0.00101                      | 97854                                             | 66196                                        | 32481                                   |
| 35-39     | 0.00132                      | 86582                                             | 79824                                        | 37589                                   |
| 40-44     | 0.00157                      | 65676                                             | 80899                                        | 47844                                   |
| 45-49     | 0.00235                      | 42021                                             | 69211                                        | 54380                                   |
| 50-54     | 0.00354                      | 36458                                             | 52827                                        | 45386                                   |
| 55-59     | 0.00526                      | 24456                                             | 38377                                        | 41010                                   |

†Values used in this table are for the urban population

1 Initial value used in the stock of not-overweight population in 2005.

2 Initial value used in the stock of overweight population in 2005.

3 Initial value used in the stock of obese population in 2005.

**Table 97. Man mortality rates and population size by age group for the lower socioeconomic status population (Pacifica region) †**

| Age group | Mortality rates (R) (%/year) | Not- overweight men in 2005 (Number of people)1 | Overweight men in 2005 (Number of people)2 | Obese men 2005 (Number of people)3 |
|-----------|------------------------------|-------------------------------------------------|--------------------------------------------|------------------------------------|
| 0-4       | 0.00307                      | 62753                                           | 10535                                      | 4581                               |

|       |         |       |       |      |
|-------|---------|-------|-------|------|
| 5-9   | 0.00033 | 60992 | 7870  | 984  |
| 10-14 | 0.00038 | 91518 | 6460  | 2153 |
| 15-19 | 0.00275 | 76099 | 0     | 0    |
| 20-24 | 0.00451 | 56168 | 7230  | 1668 |
| 25-29 | 0.00478 | 32995 | 6599  | 3299 |
| 30-34 | 0.00447 | 28613 | 8011  | 4578 |
| 35-39 | 0.00378 | 29216 | 11329 | 2385 |
| 40-44 | 0.00398 | 22394 | 13315 | 4237 |
| 45-49 | 0.00447 | 21327 | 8531  | 3656 |
| 50-54 | 0.00621 | 16597 | 3319  | 1897 |
| 55-59 | 0.00823 | 13099 | 5359  | 1786 |

†Values used in this table are for the urban population

<sup>1</sup> Initial value used in the stock of not-overweight population in 2005 for lower SES.

<sup>2</sup> Initial value used in the stock of overweight population in 2005 for lower SES.

<sup>3</sup> Initial value used in the stock of obese population in 2005 for lower SES.

**Table 98. Women mortality rates and population size by age group for the lower socioeconomic status population (Pacifica region) †**

| Age group | Mortality rates (R) (%/year) | Not- overweight women in 2005 (Number of people) <sup>1</sup> | Overweight women in 2005 (Number of people) <sup>2</sup> | Obese women in 2005 (Number of people) <sup>3</sup> |
|-----------|------------------------------|---------------------------------------------------------------|----------------------------------------------------------|-----------------------------------------------------|
| 0-4       | 0.00252                      | 60770                                                         | 10277                                                    | 4022                                                |
| 5-9       | 0.00019                      | 61118                                                         | 4289                                                     | 2145                                                |
| 10-14     | 0.00028                      | 84410                                                         | 12598                                                    | 0                                                   |
| 15-19     | 0.00059                      | 56848                                                         | 16551                                                    | 2878                                                |
| 20-24     | 0.00085                      | 51013                                                         | 14225                                                    | 3924                                                |
| 25-29     | 0.00095                      | 25262                                                         | 14644                                                    | 6956                                                |
| 30-34     | 0.00101                      | 22850                                                         | 16080                                                    | 7617                                                |
| 35-39     | 0.00132                      | 22670                                                         | 17965                                                    | 9838                                                |
| 40-44     | 0.00157                      | 18080                                                         | 17563                                                    | 11881                                               |
| 45-49     | 0.00235                      | 9149                                                          | 18807                                                    | 12707                                               |
| 50-54     | 0.00354                      | 7429                                                          | 10948                                                    | 8211                                                |
| 55-59     | 0.00526                      | 5330                                                          | 10660                                                    | 8528                                                |

†Values used in this table are for the urban population

<sup>1</sup> Initial value used in the stock of not-overweight population in 2005 for lower SES.

<sup>2</sup> Initial value used in the stock of overweight population in 2005 for lower SES.

<sup>3</sup> Initial value used in the stock of obese population in 2005 for lower SES.

**Table 99. Man mortality rates and population size by age group for the middle socioeconomic status population (Pacifica region) †**

| Age group | Mortality rates (R) (%/year) | Not- overweight men in 2005 (Number of people) <sup>1</sup> | Overweight men in 2005 (Number of people) <sup>2</sup> | Obese men in 2005 (Number of people) <sup>3</sup> |
|-----------|------------------------------|-------------------------------------------------------------|--------------------------------------------------------|---------------------------------------------------|
| 0-4       | 0.00307                      | 46722                                                       | 9161                                                   | 4581                                              |
| 5-9       | 0.00033                      | 65911                                                       | 8854                                                   | 984                                               |
| 10-14     | 0.00038                      | 52757                                                       | 9690                                                   | 3230                                              |
| 15-19     | 0.00275                      | 61030                                                       | 5274                                                   | 1507                                              |
| 20-24     | 0.00451                      | 43933                                                       | 12235                                                  | 2781                                              |
| 25-29     | 0.00478                      | 39044                                                       | 17597                                                  | 6049                                              |
| 30-34     | 0.00447                      | 29185                                                       | 21173                                                  | 5150                                              |
| 35-39     | 0.00378                      | 27427                                                       | 19080                                                  | 5366                                              |
| 40-44     | 0.00398                      | 20578                                                       | 14526                                                  | 3631                                              |
| 45-49     | 0.00447                      | 14624                                                       | 15234                                                  | 4265                                              |
| 50-54     | 0.00621                      | 12329                                                       | 13277                                                  | 2845                                              |
| 55-59     | 0.00823                      | 4168                                                        | 10122                                                  | 4168                                              |



†Values used in this table are for the urban population

1 Initial value used in the stock of not-overweight population in 2005 for middle SES.

2 Initial value used in the stock of overweight population in 2005 for middle SES.

3 Initial value used in the stock of obese population in 2005 for middle SES.

**Table 100. Women mortality rates and population size by age group for the middle socioeconomic status population (Pacifica region) †**

| Age group | Mortality rates (R) (%/year) | Not- overweight women in 2005 (Number of people) <sup>1</sup> | Overweight women in 2005 (Number of people) <sup>2</sup> | Obese women in 2005 (Number of people) <sup>3</sup> |
|-----------|------------------------------|---------------------------------------------------------------|----------------------------------------------------------|-----------------------------------------------------|
| 0-4       | 0.00252                      | 43117                                                         | 13175                                                    | 1996                                                |
| 5-9       | 0.00019                      | 62942                                                         | 8255                                                     | 2064                                                |
| 10-14     | 0.00028                      | 49298                                                         | 8599                                                     | 5732                                                |
| 15-19     | 0.00059                      | 57171                                                         | 9528                                                     | 1270                                                |
| 20-24     | 0.00085                      | 46442                                                         | 13638                                                    | 2580                                                |
| 25-29     | 0.00095                      | 40211                                                         | 21210                                                    | 7070                                                |
| 30-34     | 0.00101                      | 28547                                                         | 22463                                                    | 11699                                               |
| 35-39     | 0.00132                      | 24950                                                         | 19960                                                    | 16079                                               |
| 40-44     | 0.00157                      | 13218                                                         | 18219                                                    | 14647                                               |
| 45-49     | 0.00235                      | 10121                                                         | 15181                                                    | 16101                                               |
| 50-54     | 0.00354                      | 9248                                                          | 14334                                                    | 11097                                               |
| 55-59     | 0.00526                      | 4900                                                          | 7043                                                     | 10412                                               |

†Values used in this table are for the urban population

1 Initial value used in the stock of not-overweight population in 2005 for middle SES.

2 Initial value used in the stock of overweight population in 2005 for middle SES.

3 Initial value used in the stock of obese population in 2005 for middle SES.

**Table 101. Man mortality rates and population size by age group for the higher socioeconomic status population (Pacifica region) †**

| Age group | Mortality rates (R) (%/year) | Not- overweight men in 2005 (Number of people) <sup>1</sup> | Overweight men in 2005 (Number of people) <sup>2</sup> | Obese men in 2005 (Number of people) <sup>3</sup> |
|-----------|------------------------------|-------------------------------------------------------------|--------------------------------------------------------|---------------------------------------------------|
| 0-4       | 0.00307                      | 75121                                                       | 16948                                                  | 4581                                              |
| 5-9       | 0.00033                      | 76732                                                       | 16724                                                  | 9837                                              |
| 10-14     | 0.00038                      | 74291                                                       | 17227                                                  | 4307                                              |
| 15-19     | 0.00275                      | 88908                                                       | 16576                                                  | 3767                                              |
| 20-24     | 0.00451                      | 76744                                                       | 17796                                                  | 5005                                              |
| 25-29     | 0.00478                      | 51692                                                       | 32995                                                  | 7699                                              |
| 30-34     | 0.00447                      | 35480                                                       | 30902                                                  | 10873                                             |
| 35-39     | 0.00378                      | 27427                                                       | 35775                                                  | 15502                                             |
| 40-44     | 0.00398                      | 25420                                                       | 42972                                                  | 16342                                             |
| 45-49     | 0.00447                      | 15234                                                       | 40826                                                  | 12796                                             |
| 50-54     | 0.00621                      | 19916                                                       | 30348                                                  | 9958                                              |
| 55-59     | 0.00823                      | 15481                                                       | 25008                                                  | 6550                                              |

†Values used in this table are for the urban population

<sup>1</sup> Initial value used in the stock of not-overweight population in 2005 for higher SES.

<sup>2</sup> Initial value used in the stock of overweight population in 2005 for higher SES.

<sup>3</sup> Initial value used in the stock of obese population in 2005 for higher SES.

**Table 102. Women mortality rates and population size by age group for the higher socioeconomic status population (Pacifica region) †**

| Age group | Mortality rates (R) (%/year) | Not- overweight women in 2005 (Number of people) <sup>1</sup> | Overweight women in 2005 (Number of people) <sup>2</sup> | Obese women in 2005 (Number of people) <sup>3</sup> |
|-----------|------------------------------|---------------------------------------------------------------|----------------------------------------------------------|-----------------------------------------------------|
|-----------|------------------------------|---------------------------------------------------------------|----------------------------------------------------------|-----------------------------------------------------|

|              |         |       |       |       |
|--------------|---------|-------|-------|-------|
| <b>0-4</b>   | 0.00252 | 66710 | 19848 | 6616  |
| <b>5-9</b>   | 0.00019 | 71489 | 18330 | 10082 |
| <b>10-14</b> | 0.00028 | 78415 | 9013  | 5408  |
| <b>15-19</b> | 0.00059 | 84013 | 22597 | 2897  |
| <b>20-24</b> | 0.00085 | 83064 | 19301 | 3447  |
| <b>25-29</b> | 0.00095 | 64268 | 25954 | 10711 |
| <b>30-34</b> | 0.00101 | 45875 | 27973 | 13427 |
| <b>35-39</b> | 0.00132 | 38828 | 40279 | 13426 |
| <b>40-44</b> | 0.00157 | 35239 | 45052 | 20519 |
| <b>45-49</b> | 0.00235 | 22327 | 35291 | 25928 |
| <b>50-54</b> | 0.00354 | 19776 | 27820 | 25809 |
| <b>55-59</b> | 0.00526 | 14152 | 21409 | 21409 |

<sup>†</sup>Values used in this table are for the urban population

<sup>1</sup> Initial value used in the stock of not-overweight population in 2005 for higher SES.

<sup>2</sup> Initial value used in the stock of overweight population in 2005 for higher SES.

<sup>3</sup> Initial value used in the stock of obese population in 2005 for higher SES.

**Table 103. Data and projections of the Fertility rates by department and Region (Pacifica region)<sup>†</sup>**

| Year        | Fecundity Rate<br>Depto 19 | Fecundity<br>Rate<br>Depto 27 | Fecundity<br>Rate<br>Depto 52 | Fecundity<br>Rate<br>Depto 76 | Average<br>Region<br>Fecundity<br>Rate |
|-------------|----------------------------|-------------------------------|-------------------------------|-------------------------------|----------------------------------------|
| <b>2005</b> | 2,9221                     | 4,2998                        | 2,8307                        | 2,1453                        | 3,049                                  |
| <b>2006</b> | 2,8724                     | 4,2157                        | 2,7773                        | 2,1232                        | 2,997                                  |
| <b>2007</b> | 2,8227                     | 4,1316                        | 2,7239                        | 2,1011                        | 2,945                                  |
| <b>2008</b> | 2,773                      | 4,0475                        | 2,6705                        | 2,079                         | 2,893                                  |
| <b>2009</b> | 2,7509                     | 3,9639                        | 2,6396                        | 2,0708                        | 2,856                                  |
| <b>2010</b> | 2,7288                     | 3,8803                        | 2,6087                        | 2,0626                        | 2,820                                  |
| <b>2011</b> | 2,7067                     | 3,7967                        | 2,5778                        | 2,0544                        | 2,784                                  |
| <b>2012</b> | 2,6846                     | 3,7131                        | 2,5469                        | 2,0462                        | 2,748                                  |
| <b>2013</b> | 2,6625                     | 3,6295                        | 2,516                         | 2,038                         | 2,712                                  |
| <b>2014</b> | 2,6518                     | 3,5632                        | 2,4997                        | 2,035                         | 2,687                                  |
| <b>2015</b> | 2,6411                     | 3,4969                        | 2,4834                        | 2,032                         | 2,663                                  |
| <b>2016</b> | 2,6304                     | 3,4306                        | 2,4671                        | 2,029                         | 2,639                                  |
| <b>2017</b> | 2,6197                     | 3,3643                        | 2,4508                        | 2,026                         | 2,615                                  |
| <b>2018</b> | 2,609                      | 3,298                         | 2,4345                        | 2,023                         | 2,591                                  |
| <b>2019</b> | 2,5983                     | 3,2317                        | 2,4182                        | 2,02                          | 2,567                                  |
| <b>2020</b> | 2,5876                     | 3,1654                        | 2,4019                        | 2,017                         | 2,543                                  |
| <b>2021</b> | 2,5769                     | 3,0991                        | 2,3856                        | 2,014                         | 2,519                                  |
| <b>2022</b> | 2,5662                     | 3,0328                        | 2,3693                        | 2,011                         | 2,495                                  |
| <b>2023</b> | 2,5555                     | 2,9665                        | 2,353                         | 2,008                         | 2,471                                  |
| <b>2024</b> | 2,5448                     | 2,9002                        | 2,3367                        | 2,005                         | 2,447                                  |
| <b>2025</b> | 2,5341                     | 2,8339                        | 2,3204                        | 2,002                         | 2,423                                  |

| Year | Fecundity Rate Depto 19 | Fecundity Rate Depto 27 | Fecundity Rate Depto 52 | Fecundity Rate Depto 76 | Average Region Fecundity Rate |
|------|-------------------------|-------------------------|-------------------------|-------------------------|-------------------------------|
| 2026 | 2,5234                  | 2,7676                  | 2,3041                  | 1,999                   | 2,399                         |
| 2027 | 2,5127                  | 2,7013                  | 2,2878                  | 1,996                   | 2,374                         |
| 2028 | 2,502                   | 2,635                   | 2,2715                  | 1,993                   | 2,350                         |
| 2029 | 2,4913                  | 2,5687                  | 2,2552                  | 1,99                    | 2,326                         |
| 2030 | 2,4806                  | 2,5024                  | 2,2389                  | 1,987                   | 2,302                         |

† Data of Fertility rate of DANE [1] was used to forecast the department's fertility rate from 2005 to 2030. Holt-Winters no seasonal method in EViews 5 (Quantitative Micro Software, LLC) was used to forecast the fertility rate. In the SD model we used data from 2005 to 2030 and the region fertility rate was calculated as the average of all departments' fertility rates.

**Table 104. Fraction of births by departments, body mass index category, and socioeconomic status (Pacifica region) †**

| Population group |                 | Lower SES (%/year) | Middle SES (%/year) | Higher SES (%/year) | Complete Urban Population (%/year) |
|------------------|-----------------|--------------------|---------------------|---------------------|------------------------------------|
| Department 19    | Not- overweight | 83,33%             | 75,00%              | 72,73%              | 78,05%                             |
|                  | Overweight      | 11,11%             | 25,00%              | 27,27%              | 19,51%                             |
|                  | Obese           | 5,56%              | 0,00%               | 0,00%               | 2,44%                              |
| Department 27    | Not- overweight | 75,00%             | 60,00%              | 80,00%              | 73,08%                             |
|                  | Overweight      | 18,75%             | 0,00%               | 20,00%              | 15,38%                             |
|                  | Obese           | 6,25%              | 40,00%              | 0,00%               | 11,54%                             |
| Department 52    | Not- overweight | 69,23%             | 83,33%              | 68,75%              | 73,17%                             |
|                  | Overweight      | 23,08%             | 8,33%               | 31,25%              | 21,95%                             |
|                  | Obese           | 7,69%              | 8,33%               | 0,00%               | 4,88%                              |
| Department 76    | Not- overweight | 84,38%             | 81,82%              | 80,00%              | 81,74%                             |
|                  | Overweight      | 9,38%              | 18,18%              | 16,00%              | 14,78%                             |
|                  | Obese           | 6,25%              | 0,00%               | 4,00%               | 3,48%                              |

† The fractions of births by each BMI category correspond to the prevalences by BMI category of children aged 0 to 12 months

**Table 105. Prevalent rates of entire population by age group, and body mass index category (Pacifica region)**

| Departments   | Age group | Not- overweight in 2005 | Overweight in 2005 | Obese in 2005 | Not- overweight in 2010 | Overweight in 2010 | Obese in 2010 |
|---------------|-----------|-------------------------|--------------------|---------------|-------------------------|--------------------|---------------|
| Department 19 | 0-4       | 0.75172                 | 0.19310            | 0.05517       | 0.68485                 | 0.23030            | 0.08485       |
|               | 5-9       | 0.84524                 | 0.10714            | 0.04762       | 0.73418                 | 0.19620            | 0.06962       |
|               | 10-14     | 0.82143                 | 0.16667            | 0.01190       | 0.70202                 | 0.21717            | 0.08081       |
|               | 15-19     | 0.80000                 | 0.17692            | 0.02308       | 0.76471                 | 0.20321            | 0.03209       |
|               | 20-24     | 0.80226                 | 0.19209            | 0.00565       | 0.72789                 | 0.19048            | 0.08163       |
|               | 25-29     | 0.67717                 | 0.22047            | 0.10236       | 0.56338                 | 0.29577            | 0.14085       |
|               | 30-34     | 0.59184                 | 0.29592            | 0.11224       | 0.42975                 | 0.41322            | 0.15702       |
|               | 35-39     | 0.50420                 | 0.33613            | 0.15966       | 0.38983                 | 0.40678            | 0.20339       |
|               | 40-44     | 0.51429                 | 0.35238            | 0.13333       | 0.28704                 | 0.50000            | 0.21296       |
|               | 45-49     | 0.40260                 | 0.33766            | 0.25974       | 0.36190                 | 0.34286            | 0.29524       |
|               | 50-54     | 0.40230                 | 0.33333            | 0.26437       | 0.29885                 | 0.42529            | 0.27586       |
| 55-59         | 0.31944   | 0.41667                 | 0.26389            | 0.26744       | 0.45349                 | 0.27907            |               |
| Department 27 | 0-4       | 0.78992                 | 0.16807            | 0.04202       | 0.75899                 | 0.20144            | 0.03957       |
|               | 5-9       | 0.93023                 | 0.06977            | 0.00000       | 0.85315                 | 0.10140            | 0.04545       |

| Departments   | Age group | Not- overweight in 2005 | Overweight in 2005 | Obese in 2005 | Not- overweight in 2010 | Overweight in 2010 | Obese in 2010 |
|---------------|-----------|-------------------------|--------------------|---------------|-------------------------|--------------------|---------------|
|               | 10-14     | 0.77500                 | 0.18750            | 0.03750       | 0.83730                 | 0.11508            | 0.04762       |
|               | 15-19     | 0.84071                 | 0.14159            | 0.01770       | 0.81538                 | 0.14615            | 0.03846       |
|               | 20-24     | 0.69231                 | 0.21538            | 0.09231       | 0.73077                 | 0.18803            | 0.08120       |
|               | 25-29     | 0.54128                 | 0.30275            | 0.15596       | 0.51705                 | 0.32386            | 0.15909       |
|               | 30-34     | 0.48936                 | 0.37234            | 0.13830       | 0.37903                 | 0.39516            | 0.22581       |
|               | 35-39     | 0.44048                 | 0.33333            | 0.22619       | 0.38393                 | 0.33036            | 0.28571       |
|               | 40-44     | 0.30159                 | 0.36508            | 0.33333       | 0.33600                 | 0.41600            | 0.24800       |
|               | 45-49     | 0.17105                 | 0.51316            | 0.31579       | 0.25773                 | 0.41237            | 0.32990       |
|               | 50-54     | 0.24194                 | 0.41935            | 0.33871       | 0.39796                 | 0.33673            | 0.26531       |
|               | 55-59     | 0.21277                 | 0.40426            | 0.38298       | 0.36486                 | 0.32432            | 0.31081       |
| Department 52 | 0-4       | 0.73118                 | 0.19355            | 0.07527       | 0.70051                 | 0.24365            | 0.05584       |
|               | 5-9       | 0.75556                 | 0.18889            | 0.05556       | 0.78764                 | 0.15830            | 0.05405       |
|               | 10-14     | 0.85000                 | 0.10000            | 0.05000       | 0.74161                 | 0.21812            | 0.04027       |
|               | 15-19     | 0.87200                 | 0.10400            | 0.02400       | 0.80672                 | 0.16387            | 0.02941       |
|               | 20-24     | 0.77515                 | 0.19527            | 0.02959       | 0.71642                 | 0.23881            | 0.04478       |
|               | 25-29     | 0.56395                 | 0.37209            | 0.06395       | 0.56742                 | 0.33708            | 0.09551       |
|               | 30-34     | 0.42553                 | 0.47518            | 0.09929       | 0.41860                 | 0.45349            | 0.12791       |
|               | 35-39     | 0.39735                 | 0.47682            | 0.12583       | 0.39306                 | 0.37572            | 0.23121       |
|               | 40-44     | 0.31250                 | 0.46875            | 0.21875       | 0.28571                 | 0.45455            | 0.25974       |
|               | 45-49     | 0.25191                 | 0.37405            | 0.37405       | 0.31690                 | 0.43662            | 0.24648       |
|               | 50-54     | 0.34653                 | 0.36634            | 0.28713       | 0.26471                 | 0.45098            | 0.28431       |
| 55-59         | 0.23596   | 0.37079                 | 0.39326            | 0.17073       | 0.43902                 | 0.39024            |               |
| Department 76 | 0-4       | 0.78571                 | 0.16117            | 0.05311       | 0.75436                 | 0.17456            | 0.07107       |
|               | 5-9       | 0.80287                 | 0.13262            | 0.06452       | 0.72822                 | 0.17770            | 0.09408       |
|               | 10-14     | 0.84074                 | 0.10000            | 0.05926       | 0.74078                 | 0.18046            | 0.07876       |
|               | 15-19     | 0.82703                 | 0.14595            | 0.02703       | 0.79709                 | 0.15921            | 0.04370       |
|               | 20-24     | 0.78309                 | 0.17279            | 0.04412       | 0.70483                 | 0.21628            | 0.07888       |
|               | 25-29     | 0.62292                 | 0.27083            | 0.10625       | 0.57009                 | 0.31242            | 0.11749       |
|               | 30-34     | 0.52784                 | 0.30067            | 0.17149       | 0.44330                 | 0.39175            | 0.16495       |
|               | 35-39     | 0.45000                 | 0.38095            | 0.16905       | 0.37458                 | 0.40803            | 0.21739       |
|               | 40-44     | 0.35867                 | 0.43468            | 0.20665       | 0.37426                 | 0.43195            | 0.19379       |
|               | 45-49     | 0.31871                 | 0.46784            | 0.21345       | 0.34506                 | 0.39698            | 0.25796       |
|               | 50-54     | 0.33623                 | 0.43188            | 0.23188       | 0.29562                 | 0.39234            | 0.31204       |
| 55-59         | 0.31132   | 0.41509                 | 0.27358            | 0.27902       | 0.43750                 | 0.28348            |               |

**Table 106. Prevalent rates of lower socioeconomic status population by age group, and body mass index category (Pacifica region)**

| Departments   | Age group | Not- overweight in 2005 | Overweight in 2005 | Obese in 2005 | Not- overweight in 2010 | Overweight in 2010 | Obese in 2010 |
|---------------|-----------|-------------------------|--------------------|---------------|-------------------------|--------------------|---------------|
| Department 19 | 0-4       | 0.82353                 | 0.10294            | 0.07353       | 0.71014                 | 0.21739            | 0.07246       |
|               | 5-9       | 0.93103                 | 0.06897            | 0.00000       | 0.77193                 | 0.17544            | 0.05263       |
|               | 10-14     | 0.85294                 | 0.14706            | 0.00000       | 0.70886                 | 0.18987            | 0.10127       |
|               | 15-19     | 0.87805                 | 0.12195            | 0.00000       | 0.77419                 | 0.22581            | 0.00000       |
|               | 20-24     | 0.83333                 | 0.16667            | 0.00000       | 0.68333                 | 0.23333            | 0.08333       |
|               | 25-29     | 0.59459                 | 0.21622            | 0.18919       | 0.52273                 | 0.34091            | 0.13636       |

| Departments   | Age group | Not- overweight in 2005 | Overweight in 2005 | Obese in 2005 | Not- overweight in 2010 | Overweight in 2010 | Obese in 2010 |
|---------------|-----------|-------------------------|--------------------|---------------|-------------------------|--------------------|---------------|
|               | 30-34     | 0.58974                 | 0.20513            | 0.20513       | 0.35714                 | 0.42857            | 0.21429       |
|               | 35-39     | 0.52381                 | 0.35714            | 0.11905       | 0.39394                 | 0.36364            | 0.24242       |
|               | 40-44     | 0.62500                 | 0.18750            | 0.18750       | 0.31250                 | 0.50000            | 0.18750       |
|               | 45-49     | 0.66667                 | 0.16667            | 0.16667       | 0.41667                 | 0.29167            | 0.29167       |
|               | 50-54     | 0.57143                 | 0.17857            | 0.25000       | 0.40741                 | 0.37037            | 0.22222       |
|               | 55-59     | 0.38462                 | 0.30769            | 0.30769       | 0.33333                 | 0.40000            | 0.26667       |
| Department 27 | 0-4       | 0.80952                 | 0.15476            | 0.03571       | 0.76226                 | 0.20000            | 0.03774       |
|               | 5-9       | 0.96875                 | 0.03125            | 0.00000       | 0.85348                 | 0.09890            | 0.04762       |
|               | 10-14     | 0.83333                 | 0.14583            | 0.02083       | 0.82759                 | 0.12069            | 0.05172       |
|               | 15-19     | 0.85246                 | 0.13115            | 0.01639       | 0.81667                 | 0.15417            | 0.02917       |
|               | 20-24     | 0.74684                 | 0.17722            | 0.07595       | 0.72646                 | 0.19283            | 0.08072       |
|               | 25-29     | 0.63043                 | 0.21739            | 0.15217       | 0.49677                 | 0.33548            | 0.16774       |
|               | 30-34     | 0.57692                 | 0.34615            | 0.07692       | 0.37719                 | 0.41228            | 0.21053       |
|               | 35-39     | 0.54167                 | 0.31250            | 0.14583       | 0.39048                 | 0.31429            | 0.29524       |
|               | 40-44     | 0.41379                 | 0.31034            | 0.27586       | 0.35088                 | 0.40351            | 0.24561       |
|               | 45-49     | 0.23404                 | 0.46809            | 0.29787       | 0.24731                 | 0.43011            | 0.32258       |
|               | 50-54     | 0.28571                 | 0.50000            | 0.21429       | 0.37931                 | 0.36782            | 0.25287       |
|               | 55-59     | 0.26087                 | 0.43478            | 0.30435       | 0.38095                 | 0.31746            | 0.30159       |
| Department 52 | 0-4       | 0.68852                 | 0.18033            | 0.13115       | 0.70370                 | 0.24074            | 0.05556       |
|               | 5-9       | 0.77778                 | 0.14815            | 0.07407       | 0.80986                 | 0.14789            | 0.04225       |
|               | 10-14     | 0.93750                 | 0.03125            | 0.03125       | 0.74324                 | 0.22297            | 0.03378       |
|               | 15-19     | 0.91892                 | 0.05405            | 0.02703       | 0.76471                 | 0.19118            | 0.04412       |
|               | 20-24     | 0.78125                 | 0.18750            | 0.03125       | 0.70787                 | 0.25843            | 0.03371       |
|               | 25-29     | 0.60870                 | 0.28261            | 0.10870       | 0.58904                 | 0.28767            | 0.12329       |
|               | 30-34     | 0.46429                 | 0.46429            | 0.07143       | 0.35714                 | 0.48571            | 0.15714       |
|               | 35-39     | 0.51351                 | 0.32432            | 0.16216       | 0.38806                 | 0.41791            | 0.19403       |
|               | 40-44     | 0.39286                 | 0.39286            | 0.21429       | 0.31034                 | 0.46552            | 0.22414       |
|               | 45-49     | 0.35714                 | 0.32143            | 0.32143       | 0.32558                 | 0.37209            | 0.30233       |
|               | 50-54     | 0.56250                 | 0.12500            | 0.31250       | 0.38462                 | 0.28205            | 0.33333       |
|               | 55-59     | 0.53333                 | 0.26667            | 0.20000       | 0.20690                 | 0.48276            | 0.31034       |
| Department 76 | 0-4       | 0.85600                 | 0.12000            | 0.02400       | 0.73826                 | 0.22819            | 0.03356       |
|               | 5-9       | 0.86957                 | 0.10870            | 0.02174       | 0.84146                 | 0.14634            | 0.01220       |
|               | 10-14     | 0.94643                 | 0.05357            | 0.00000       | 0.84568                 | 0.12346            | 0.03086       |
|               | 15-19     | 0.85294                 | 0.11765            | 0.02941       | 0.82677                 | 0.12598            | 0.04724       |
|               | 20-24     | 0.81609                 | 0.13793            | 0.04598       | 0.68868                 | 0.19811            | 0.11321       |
|               | 25-29     | 0.64935                 | 0.27273            | 0.07792       | 0.52747                 | 0.32967            | 0.14286       |
|               | 30-34     | 0.60317                 | 0.20635            | 0.19048       | 0.42466                 | 0.35616            | 0.21918       |
|               | 35-39     | 0.55556                 | 0.30159            | 0.14286       | 0.40000                 | 0.32308            | 0.27692       |
|               | 40-44     | 0.42029                 | 0.43478            | 0.14493       | 0.58333                 | 0.30000            | 0.11667       |
|               | 45-49     | 0.47619                 | 0.40476            | 0.11905       | 0.45902                 | 0.24590            | 0.29508       |
|               | 50-54     | 0.50000                 | 0.33333            | 0.16667       | 0.46000                 | 0.36000            | 0.18000       |
|               | 55-59     | 0.44828                 | 0.37931            | 0.17241       | 0.37500                 | 0.42500            | 0.20000       |

**Table 107. Prevalent rates of middle socioeconomic status population by age group, and body mass index category (Pacifica region)**

| Departments   | Age group | Not- overweight in 2005 | Overweight in 2005 | Obese in 2005 | Not- overweight in 2010 | Overweight in 2010 | Obese in 2010 |
|---------------|-----------|-------------------------|--------------------|---------------|-------------------------|--------------------|---------------|
| Department 19 | 0-4       | 0.74359                 | 0.23077            | 0.02564       | 0.68354                 | 0.21519            | 0.10127       |
|               | 5-9       | 0.85714                 | 0.10714            | 0.03571       | 0.69014                 | 0.25352            | 0.05634       |
|               | 10-14     | 0.80769                 | 0.19231            | 0.00000       | 0.67500                 | 0.27500            | 0.05000       |
|               | 15-19     | 0.77143                 | 0.20000            | 0.02857       | 0.75510                 | 0.20408            | 0.04082       |
|               | 20-24     | 0.78378                 | 0.21622            | 0.00000       | 0.75000                 | 0.15625            | 0.09375       |
|               | 25-29     | 0.63158                 | 0.28947            | 0.07895       | 0.52239                 | 0.28358            | 0.19403       |
|               | 30-34     | 0.68000                 | 0.28000            | 0.04000       | 0.50769                 | 0.36923            | 0.12308       |
|               | 35-39     | 0.50000                 | 0.26923            | 0.23077       | 0.28571                 | 0.50000            | 0.21429       |
|               | 40-44     | 0.44000                 | 0.40000            | 0.16000       | 0.23404                 | 0.46809            | 0.29787       |
|               | 45-49     | 0.43478                 | 0.30435            | 0.26087       | 0.31481                 | 0.33333            | 0.35185       |
|               | 50-54     | 0.35294                 | 0.35294            | 0.29412       | 0.23529                 | 0.44118            | 0.32353       |
|               | 55-59     | 0.32000                 | 0.40000            | 0.28000       | 0.28947                 | 0.42105            | 0.28947       |
| Department 27 | 0-4       | 0.73684                 | 0.15789            | 0.10526       | 0.75000                 | 0.16667            | 0.08333       |
|               | 5-9       | 0.88889                 | 0.11111            | 0.00000       | 0.84615                 | 0.15385            | 0.00000       |
|               | 10-14     | 0.60000                 | 0.32000            | 0.08000       | 0.94737                 | 0.05263            | 0.00000       |
|               | 15-19     | 0.77778                 | 0.18519            | 0.03704       | 0.78947                 | 0.05263            | 0.15789       |
|               | 20-24     | 0.55172                 | 0.27586            | 0.17241       | 0.75000                 | 0.12500            | 0.12500       |
|               | 25-29     | 0.48571                 | 0.34286            | 0.17143       | 0.70588                 | 0.17647            | 0.11765       |
|               | 30-34     | 0.44828                 | 0.34483            | 0.20690       | 0.44444                 | 0.11111            | 0.44444       |
|               | 35-39     | 0.31818                 | 0.31818            | 0.36364       | 0.33333                 | 0.66667            | 0.00000       |
|               | 40-44     | 0.17391                 | 0.47826            | 0.34783       | 0.10000                 | 0.60000            | 0.30000       |
|               | 45-49     | 0.11111                 | 0.50000            | 0.38889       | 0.50000                 | 0.00000            | 0.50000       |
|               | 50-54     | 0.16667                 | 0.41667            | 0.41667       | 0.54545                 | 0.09091            | 0.36364       |
|               | 55-59     | 0.18182                 | 0.18182            | 0.63636       | 0.30000                 | 0.40000            | 0.30000       |
| Department 52 | 0-4       | 0.70909                 | 0.23636            | 0.05455       | 0.67143                 | 0.25714            | 0.07143       |
|               | 5-9       | 0.80645                 | 0.19355            | 0.00000       | 0.76087                 | 0.16304            | 0.07609       |
|               | 10-14     | 0.81579                 | 0.10526            | 0.07895       | 0.75000                 | 0.20370            | 0.04630       |
|               | 15-19     | 0.91892                 | 0.08108            | 0.00000       | 0.84810                 | 0.13924            | 0.01266       |
|               | 20-24     | 0.75610                 | 0.21951            | 0.02439       | 0.70423                 | 0.25352            | 0.04225       |
|               | 25-29     | 0.54902                 | 0.43137            | 0.01961       | 0.53750                 | 0.36250            | 0.10000       |
|               | 30-34     | 0.37255                 | 0.54902            | 0.07843       | 0.46875                 | 0.40625            | 0.12500       |
|               | 35-39     | 0.43902                 | 0.39024            | 0.17073       | 0.38554                 | 0.38554            | 0.22892       |
|               | 40-44     | 0.27027                 | 0.40541            | 0.32432       | 0.30159                 | 0.42857            | 0.26984       |
|               | 45-49     | 0.25000                 | 0.32143            | 0.42857       | 0.34848                 | 0.42424            | 0.22727       |
|               | 50-54     | 0.28000                 | 0.44000            | 0.28000       | 0.19444                 | 0.55556            | 0.25000       |
|               | 55-59     | 0.18519                 | 0.37037            | 0.44444       | 0.19355                 | 0.35484            | 0.45161       |
| Department 76 | 0-4       | 0.77576                 | 0.16970            | 0.05455       | 0.75102                 | 0.18367            | 0.06531       |
|               | 5-9       | 0.88750                 | 0.08750            | 0.02500       | 0.78226                 | 0.13710            | 0.08065       |
|               | 10-14     | 0.81928                 | 0.08434            | 0.09639       | 0.75899                 | 0.16906            | 0.07194       |
|               | 15-19     | 0.90816                 | 0.07143            | 0.02041       | 0.81423                 | 0.16996            | 0.01581       |
|               | 20-24     | 0.76331                 | 0.20118            | 0.03550       | 0.70588                 | 0.23039            | 0.06373       |
|               | 25-29     | 0.64138                 | 0.24138            | 0.11724       | 0.51905                 | 0.35238            | 0.12857       |
|               | 30-34     | 0.50000                 | 0.31746            | 0.18254       | 0.44388                 | 0.38265            | 0.17347       |
|               | 35-39     | 0.49074                 | 0.35185            | 0.15741       | 0.33784                 | 0.42568            | 0.23649       |
| 40-44         | 0.42593   | 0.36111                 | 0.21296            | 0.46875       | 0.36250                 | 0.16875            |               |

| Departments | Age group | Not- overweight in 2005 | Overweight in 2005 | Obese in 2005 | Not- overweight in 2010 | Overweight in 2010 | Obese in 2010 |
|-------------|-----------|-------------------------|--------------------|---------------|-------------------------|--------------------|---------------|
|             | 45-49     | 0.35065                 | 0.42857            | 0.22078       | 0.28448                 | 0.50000            | 0.21552       |
|             | 50-54     | 0.38272                 | 0.45679            | 0.16049       | 0.29839                 | 0.26613            | 0.43548       |
|             | 55-59     | 0.19512                 | 0.43902            | 0.36585       | 0.32558                 | 0.40698            | 0.26744       |

**Table 108. Prevalent rates of higher socioeconomic status population by age group, and body mass index category (Pacifica region)**

| Departments   | Age group | Not- overweight in 2005 | Overweight in 2005 | Obese in 2005 | Not- overweight in 2010 | Overweight in 2010 | Obese in 2010 |
|---------------|-----------|-------------------------|--------------------|---------------|-------------------------|--------------------|---------------|
| Department 19 | 0-4       | 0.63158                 | 0.31579            | 0.05263       | 0.58824                 | 0.35294            | 0.05882       |
|               | 5-9       | 0.74074                 | 0.14815            | 0.11111       | 0.76667                 | 0.10000            | 0.13333       |
|               | 10-14     | 0.79167                 | 0.16667            | 0.04167       | 0.74359                 | 0.15385            | 0.10256       |
|               | 15-19     | 0.75926                 | 0.20370            | 0.03704       | 0.77778                 | 0.14815            | 0.07407       |
|               | 20-24     | 0.78750                 | 0.20000            | 0.01250       | 0.78261                 | 0.17391            | 0.04348       |
|               | 25-29     | 0.76923                 | 0.17308            | 0.05769       | 0.70968                 | 0.25806            | 0.03226       |
|               | 30-34     | 0.52941                 | 0.41176            | 0.05882       | 0.32143                 | 0.50000            | 0.17857       |
|               | 35-39     | 0.49020                 | 0.35294            | 0.15686       | 0.58621                 | 0.27586            | 0.13793       |
|               | 40-44     | 0.47917                 | 0.43750            | 0.08333       | 0.34483                 | 0.55172            | 0.10345       |
|               | 45-49     | 0.25000                 | 0.44444            | 0.30556       | 0.40741                 | 0.40741            | 0.18519       |
|               | 50-54     | 0.30952                 | 0.42857            | 0.26190       | 0.26923                 | 0.46154            | 0.26923       |
|               | 55-59     | 0.29412                 | 0.47059            | 0.23529       | 0.21212                 | 0.51515            | 0.27273       |
| Department 52 | 0-4       | 0.78571                 | 0.17143            | 0.04286       | 0.78947                 | 0.21053            | 0.00000       |
|               | 5-9       | 0.68750                 | 0.21875            | 0.09375       | 0.76000                 | 0.20000            | 0.04000       |
|               | 10-14     | 0.80000                 | 0.16667            | 0.03333       | 0.71429                 | 0.23810            | 0.04762       |
|               | 15-19     | 0.80392                 | 0.15686            | 0.03922       | 0.91304                 | 0.08696            | 0.00000       |
|               | 20-24     | 0.78125                 | 0.18750            | 0.03125       | 0.75610                 | 0.17073            | 0.07317       |
|               | 25-29     | 0.54667                 | 0.38667            | 0.06667       | 0.60000                 | 0.40000            | 0.00000       |
|               | 30-34     | 0.45161                 | 0.41935            | 0.12903       | 0.44737                 | 0.47368            | 0.07895       |
|               | 35-39     | 0.31507                 | 0.60274            | 0.08219       | 0.43478                 | 0.21739            | 0.34783       |
|               | 40-44     | 0.30159                 | 0.53968            | 0.15873       | 0.21212                 | 0.48485            | 0.30303       |
|               | 45-49     | 0.21333                 | 0.41333            | 0.37333       | 0.24242                 | 0.54545            | 0.21212       |
|               | 50-54     | 0.31667                 | 0.40000            | 0.28333       | 0.18519                 | 0.55556            | 0.25926       |
|               | 55-59     | 0.17021                 | 0.40426            | 0.42553       | 0.09091                 | 0.50000            | 0.40909       |
| Department 76 | 0-4       | 0.75781                 | 0.17578            | 0.06641       | 0.75781                 | 0.17578            | 0.06641       |
|               | 5-9       | 0.73856                 | 0.16340            | 0.09804       | 0.73856                 | 0.16340            | 0.09804       |
|               | 10-14     | 0.80916                 | 0.12977            | 0.06107       | 0.80916                 | 0.12977            | 0.06107       |
|               | 15-19     | 0.77941                 | 0.19118            | 0.02941       | 0.77941                 | 0.19118            | 0.02941       |
|               | 20-24     | 0.78472                 | 0.16667            | 0.04861       | 0.78472                 | 0.16667            | 0.04861       |
|               | 25-29     | 0.60465                 | 0.28682            | 0.10853       | 0.60465                 | 0.28682            | 0.10853       |
|               | 30-34     | 0.52308                 | 0.31538            | 0.16154       | 0.52308                 | 0.31538            | 0.16154       |
|               | 35-39     | 0.40562                 | 0.41365            | 0.18072       | 0.40562                 | 0.41365            | 0.18072       |
|               | 40-44     | 0.31148                 | 0.46721            | 0.22131       | 0.31148                 | 0.46721            | 0.22131       |
|               | 45-49     | 0.27803                 | 0.49327            | 0.22870       | 0.27803                 | 0.49327            | 0.22870       |
|               | 50-54     | 0.28829                 | 0.44144            | 0.27027       | 0.28829                 | 0.44144            | 0.27027       |
|               | 55-59     | 0.31690                 | 0.41549            | 0.26761       | 0.31690                 | 0.41549            | 0.26761       |

**Table 109. Mortality rates and population size by age group at the department level without segregate by socioeconomic status (Pacifica region) †**

| Departments   | Age group | Mortality rates (R) (%/year) | Not- overweight population in 2005 (Number of people)1 | Overweight population in 2005 (Number of people)2 | Obese population in 2005 (Number of people)3 |
|---------------|-----------|------------------------------|--------------------------------------------------------|---------------------------------------------------|----------------------------------------------|
| Department 19 | 0-4       | 0.00309                      | 36437                                                  | 9360                                              | 2674                                         |
|               | 5-9       | 0.00028                      | 44819                                                  | 5681                                              | 2525                                         |
|               | 10-14     | 0.00024                      | 44884                                                  | 9107                                              | 650                                          |
|               | 15-19     | 0.00181                      | 40556                                                  | 8969                                              | 1170                                         |
|               | 20-24     | 0.00250                      | 37846                                                  | 9062                                              | 267                                          |
|               | 25-29     | 0.00302                      | 26260                                                  | 8550                                              | 3970                                         |
|               | 30-34     | 0.00294                      | 18296                                                  | 9148                                              | 3470                                         |
|               | 35-39     | 0.00275                      | 15428                                                  | 10285                                             | 4886                                         |
|               | 40-44     | 0.00321                      | 15055                                                  | 10316                                             | 3903                                         |
|               | 45-49     | 0.00387                      | 10094                                                  | 8466                                              | 6512                                         |
|               | 50-54     | 0.00425                      | 8229                                                   | 6818                                              | 5408                                         |
| 55-59         | 0.00776   | 4814                         | 6280                                                   | 3977                                              |                                              |
| Department 27 | 0-4       | 0.00440                      | 22963                                                  | 4886                                              | 1221                                         |
|               | 5-9       | 0.00059                      | 26607                                                  | 1996                                              | 0                                            |
|               | 10-14     | 0.00065                      | 22659                                                  | 5482                                              | 1096                                         |
|               | 15-19     | 0.00136                      | 23515                                                  | 3960                                              | 495                                          |
|               | 20-24     | 0.00206                      | 13767                                                  | 4283                                              | 1836                                         |
|               | 25-29     | 0.00235                      | 8285                                                   | 4634                                              | 2387                                         |
|               | 30-34     | 0.00185                      | 5809                                                   | 4420                                              | 1642                                         |
|               | 35-39     | 0.00216                      | 4900                                                   | 3708                                              | 2516                                         |
|               | 40-44     | 0.00200                      | 3016                                                   | 3650                                              | 3333                                         |
|               | 45-49     | 0.00381                      | 1573                                                   | 4719                                              | 2904                                         |
|               | 50-54     | 0.00436                      | 1608                                                   | 2787                                              | 2251                                         |
| 55-59         | 0.00591   | 1044                         | 1983                                                   | 1879                                              |                                              |
| Department 52 | 0-4       | 0.00270                      | 52291                                                  | 13842                                             | 5383                                         |
|               | 5-9       | 0.00015                      | 55525                                                  | 13881                                             | 4083                                         |
|               | 10-14     | 0.00019                      | 62976                                                  | 7409                                              | 3704                                         |
|               | 15-19     | 0.00074                      | 63642                                                  | 7590                                              | 1752                                         |
|               | 20-24     | 0.00147                      | 53883                                                  | 13574                                             | 2057                                         |
|               | 25-29     | 0.00133                      | 33581                                                  | 22157                                             | 3808                                         |
|               | 30-34     | 0.00144                      | 20726                                                  | 23144                                             | 4836                                         |
|               | 35-39     | 0.00134                      | 19595                                                  | 23514                                             | 6205                                         |
|               | 40-44     | 0.00181                      | 13464                                                  | 20196                                             | 9425                                         |
|               | 45-49     | 0.00200                      | 8963                                                   | 13308                                             | 13308                                        |
|               | 50-54     | 0.00261                      | 10100                                                  | 10678                                             | 8369                                         |
| 55-59         | 0.00450   | 5403                         | 8491                                                   | 9006                                              |                                              |
| Department 76 | 0-4       | 0.00269                      | 240302                                                 | 49293                                             | 16244                                        |
|               | 5-9       | 0.00025                      | 265413                                                 | 43840                                             | 21328                                        |
|               | 10-14     | 0.00035                      | 292694                                                 | 34814                                             | 20630                                        |
|               | 15-19     | 0.00196                      | 278955                                                 | 49227                                             | 9116                                         |



| Departments | Age group | Mortality rates (R) (%/year) | Not- overweight population in 2005 (Number of people)1 | Overweight population in 2005 (Number of people)2 | Obese population in 2005 (Number of people)3 |
|-------------|-----------|------------------------------|--------------------------------------------------------|---------------------------------------------------|----------------------------------------------|
|             | 20-24     | 0.00299                      | 248696                                                 | 54876                                             | 14011                                        |
|             | 25-29     | 0.00317                      | 181222                                                 | 78792                                             | 30911                                        |
|             | 30-34     | 0.00298                      | 140126                                                 | 79819                                             | 45526                                        |
|             | 35-39     | 0.00280                      | 120509                                                 | 102018                                            | 45270                                        |
|             | 40-44     | 0.00298                      | 91932                                                  | 111415                                            | 52968                                        |
|             | 45-49     | 0.00373                      | 68100                                                  | 99963                                             | 45608                                        |
|             | 50-54     | 0.00562                      | 58095                                                  | 74622                                             | 40065                                        |
|             | 55-59     | 0.00749                      | 41714                                                  | 55618                                             | 36657                                        |

<sup>†</sup>Values used in this table are for the urban population

<sup>1</sup> Initial value used in the stock of not-overweight population in 2005.

<sup>2</sup> Initial value used in the stock of overweight population in 2005.

<sup>3</sup> Initial value used in the stock of obese population in 2005.

**Table 110. Mortality rates and population size by age group at the department level for the lower socioeconomic status population (Pacifica region) <sup>†</sup>**

| Departments   | Age group | Mortality rates (R) (%/year) | Not- overweight population in 2005 (Number of people)1 | Overweight population in 2005 (Number of people)2 | Obese population in 2005 (Number of people)3 |
|---------------|-----------|------------------------------|--------------------------------------------------------|---------------------------------------------------|----------------------------------------------|
| Department 19 | 0-4       | 0.00309                      | 18720                                                  | 2340                                              | 1671                                         |
|               | 5-9       | 0.00028                      | 17044                                                  | 1263                                              | 0                                            |
|               | 10-14     | 0.00024                      | 18864                                                  | 3252                                              | 0                                            |
|               | 15-19     | 0.00181                      | 14039                                                  | 1950                                              | 0                                            |
|               | 20-24     | 0.00250                      | 13326                                                  | 2665                                              | 0                                            |
|               | 25-29     | 0.00302                      | 6718                                                   | 2443                                              | 2137                                         |
|               | 30-34     | 0.00294                      | 7255                                                   | 2524                                              | 2524                                         |
|               | 35-39     | 0.00275                      | 5657                                                   | 3857                                              | 1286                                         |
|               | 40-44     | 0.00321                      | 5576                                                   | 1673                                              | 1673                                         |
|               | 45-49     | 0.00387                      | 3907                                                   | 977                                               | 977                                          |
|               | 50-54     | 0.00425                      | 3762                                                   | 1176                                              | 1646                                         |
|               | 55-59     | 0.00776                      | 1047                                                   | 837                                               | 837                                          |
| Department 27 | 0-4       | 0.00440                      | 5388                                                   | 1030                                              | 238                                          |
|               | 5-9       | 0.00059                      | 4569                                                   | 147                                               | 0                                            |
|               | 10-14     | 0.00065                      | 5053                                                   | 884                                               | 126                                          |
|               | 15-19     | 0.00136                      | 4382                                                   | 674                                               | 84                                           |
|               | 20-24     | 0.00206                      | 2375                                                   | 564                                               | 242                                          |
|               | 25-29     | 0.00235                      | 1548                                                   | 534                                               | 374                                          |
|               | 30-34     | 0.00185                      | 961                                                    | 577                                               | 128                                          |
|               | 35-39     | 0.00216                      | 904                                                    | 521                                               | 243                                          |
|               | 40-44     | 0.00200                      | 678                                                    | 509                                               | 452                                          |
|               | 45-49     | 0.00381                      | 264                                                    | 529                                               | 336                                          |
|               | 50-54     | 0.00436                      | 231                                                    | 405                                               | 173                                          |
|               | 55-59     | 0.00591                      | 175                                                    | 292                                               | 204                                          |
| Department 52 | 0-4       | 0.00270                      | 16149                                                  | 4229                                              | 3076                                         |
|               | 5-9       | 0.00015                      | 17147                                                  | 3266                                              | 1633                                         |

| Departments   | Age group | Mortality rates (R) (%/year) | Not- overweight population in 2005 (Number of people) <sup>1</sup> | Overweight population in 2005 (Number of people) <sup>2</sup> | Obese population in 2005 (Number of people) <sup>3</sup> |
|---------------|-----------|------------------------------|--------------------------------------------------------------------|---------------------------------------------------------------|----------------------------------------------------------|
|               | 10-14     | 0.00019                      | 22227                                                              | 741                                                           | 741                                                      |
|               | 15-19     | 0.00074                      | 19852                                                              | 1168                                                          | 584                                                      |
|               | 20-24     | 0.00147                      | 10283                                                              | 2468                                                          | 411                                                      |
|               | 25-29     | 0.00133                      | 9694                                                               | 4501                                                          | 1731                                                     |
|               | 30-34     | 0.00144                      | 4491                                                               | 4491                                                          | 691                                                      |
|               | 35-39     | 0.00134                      | 6205                                                               | 3919                                                          | 1960                                                     |
|               | 40-44     | 0.00181                      | 3703                                                               | 3703                                                          | 2020                                                     |
|               | 45-49     | 0.00200                      | 2716                                                               | 2444                                                          | 2444                                                     |
|               | 50-54     | 0.00261                      | 2597                                                               | 577                                                           | 1443                                                     |
|               | 55-59     | 0.00450                      | 2058                                                               | 1029                                                          | 772                                                      |
| Department 76 | 0-4       | 0.00269                      | 59935                                                              | 8402                                                          | 1680                                                     |
|               | 5-9       | 0.00025                      | 47395                                                              | 5924                                                          | 1185                                                     |
|               | 10-14     | 0.00035                      | 68338                                                              | 3868                                                          | 0                                                        |
|               | 15-19     | 0.00196                      | 52874                                                              | 7293                                                          | 1823                                                     |
|               | 20-24     | 0.00299                      | 41449                                                              | 7006                                                          | 2335                                                     |
|               | 25-29     | 0.00317                      | 30305                                                              | 12728                                                         | 3637                                                     |
|               | 30-34     | 0.00298                      | 22467                                                              | 7686                                                          | 7095                                                     |
|               | 35-39     | 0.00280                      | 22316                                                              | 12115                                                         | 5739                                                     |
|               | 40-44     | 0.00298                      | 17656                                                              | 18265                                                         | 6088                                                     |
|               | 45-49     | 0.00373                      | 12495                                                              | 10621                                                         | 3124                                                     |
| 50-54         | 0.00562   | 10517                        | 7011                                                               | 3506                                                          |                                                          |
| 55-59         | 0.00749   | 8216                         | 6952                                                               | 3160                                                          |                                                          |

<sup>†</sup>Values used in this table are for the urban population

<sup>1</sup> Initial value used in the stock of not-overweight population in 2005 for lower SES.

<sup>2</sup> Initial value used in the stock of overweight population in 2005 for lower SES.

<sup>3</sup> Initial value used in the stock of obese population in 2005 for lower SES.

**Table 111. Mortality rates and population size by age group at the department level for the middle socioeconomic status population (Pacifica region) <sup>†</sup>**

| Departments   | Age group | Mortality rates (R) (%/year) | Not- overweight population in 2005 (Number of people) <sup>1</sup> | Overweight population in 2005 (Number of people) <sup>2</sup> | Obese population in 2005 (Number of people) <sup>3</sup> |
|---------------|-----------|------------------------------|--------------------------------------------------------------------|---------------------------------------------------------------|----------------------------------------------------------|
| Department 19 | 0-4       | 0.00309                      | 9694                                                               | 3009                                                          | 334                                                      |
|               | 5-9       | 0.00028                      | 15150                                                              | 1894                                                          | 631                                                      |
|               | 10-14     | 0.00024                      | 13660                                                              | 3252                                                          | 0                                                        |
|               | 15-19     | 0.00181                      | 10529                                                              | 2730                                                          | 390                                                      |
|               | 20-24     | 0.00250                      | 7729                                                               | 2132                                                          | 0                                                        |
|               | 25-29     | 0.00302                      | 7329                                                               | 3359                                                          | 916                                                      |
|               | 30-34     | 0.00294                      | 5363                                                               | 2208                                                          | 315                                                      |
|               | 35-39     | 0.00275                      | 3343                                                               | 1800                                                          | 1543                                                     |
|               | 40-44     | 0.00321                      | 3067                                                               | 2788                                                          | 1115                                                     |
|               | 45-49     | 0.00387                      | 3256                                                               | 2279                                                          | 1954                                                     |
|               | 50-54     | 0.00425                      | 1411                                                               | 1411                                                          | 1176                                                     |
| 55-59         | 0.00776   | 1675                         | 2093                                                               | 1465                                                          |                                                          |

| Departments   | Age group | Mortality rates (R) (%/year) | Not- overweight population in 2005 (Number of people) <sup>1</sup> | Overweight population in 2005 (Number of people) <sup>2</sup> | Obese population in 2005 (Number of people) <sup>3</sup> |
|---------------|-----------|------------------------------|--------------------------------------------------------------------|---------------------------------------------------------------|----------------------------------------------------------|
| Department 27 | 0-4       | 0.00440                      | 6473                                                               | 1387                                                          | 925                                                      |
|               | 5-9       | 0.00059                      | 7290                                                               | 911                                                           | 0                                                        |
|               | 10-14     | 0.00065                      | 5393                                                               | 2876                                                          | 719                                                      |
|               | 15-19     | 0.00136                      | 5762                                                               | 1372                                                          | 274                                                      |
|               | 20-24     | 0.00206                      | 3408                                                               | 1704                                                          | 1065                                                     |
|               | 25-29     | 0.00235                      | 2246                                                               | 1585                                                          | 793                                                      |
|               | 30-34     | 0.00185                      | 1493                                                               | 1149                                                          | 689                                                      |
|               | 35-39     | 0.00216                      | 910                                                                | 910                                                           | 1040                                                     |
|               | 40-44     | 0.00200                      | 446                                                                | 1227                                                          | 892                                                      |
|               | 45-49     | 0.00381                      | 230                                                                | 1035                                                          | 805                                                      |
|               | 50-54     | 0.00436                      | 260                                                                | 650                                                           | 650                                                      |
| 55-59         | 0.00591   | 173                          | 173                                                                | 604                                                           |                                                          |
| Department 52 | 0-4       | 0.00270                      | 14995                                                              | 4998                                                          | 1153                                                     |
|               | 5-9       | 0.00015                      | 20414                                                              | 4899                                                          | 0                                                        |
|               | 10-14     | 0.00019                      | 22968                                                              | 2964                                                          | 2223                                                     |
|               | 15-19     | 0.00074                      | 19852                                                              | 1752                                                          | 0                                                        |
|               | 20-24     | 0.00147                      | 12751                                                              | 3702                                                          | 411                                                      |
|               | 25-29     | 0.00133                      | 9694                                                               | 7616                                                          | 346                                                      |
|               | 30-34     | 0.00144                      | 6563                                                               | 9672                                                          | 1382                                                     |
|               | 35-39     | 0.00134                      | 5879                                                               | 5225                                                          | 2286                                                     |
|               | 40-44     | 0.00181                      | 3366                                                               | 5049                                                          | 4039                                                     |
|               | 45-49     | 0.00200                      | 1901                                                               | 2444                                                          | 3259                                                     |
|               | 50-54     | 0.00261                      | 2020                                                               | 3174                                                          | 2020                                                     |
| 55-59         | 0.00450   | 1287                         | 2573                                                               | 3088                                                          |                                                          |
| Department 76 | 0-4       | 0.00269                      | 71699                                                              | 15684                                                         | 5041                                                     |
|               | 5-9       | 0.00025                      | 84126                                                              | 8294                                                          | 2370                                                     |
|               | 10-14     | 0.00035                      | 87679                                                              | 9026                                                          | 10315                                                    |
|               | 15-19     | 0.00196                      | 81134                                                              | 6381                                                          | 1823                                                     |
|               | 20-24     | 0.00299                      | 75309                                                              | 19849                                                         | 3503                                                     |
|               | 25-29     | 0.00317                      | 56367                                                              | 21213                                                         | 10304                                                    |
|               | 30-34     | 0.00298                      | 37249                                                              | 23650                                                         | 13599                                                    |
|               | 35-39     | 0.00280                      | 33793                                                              | 24229                                                         | 10839                                                    |
|               | 40-44     | 0.00298                      | 28006                                                              | 23744                                                         | 14003                                                    |
|               | 45-49     | 0.00373                      | 16869                                                              | 20617                                                         | 10621                                                    |
|               | 50-54     | 0.00562                      | 15525                                                              | 18530                                                         | 6511                                                     |
| 55-59         | 0.00749   | 5056                         | 11376                                                              | 9480                                                          |                                                          |

† Values used in this table are for the urban population

1 Initial value used in the stock of not-overweight population in 2005 for middle SES.

2 Initial value used in the stock of overweight population in 2005 for middle SES.

3 Initial value used in the stock of obese population in 2005 for middle SES.

**Table 112. Mortality rates and population size by age group at the department level for the higher socioeconomic status population (Pacifica region) †**

| Departments   | Age group | Mortality rates (R) (%/year) | Not- overweight population in 2005 (Number of people) <sup>1</sup> | Overweight population in 2005 (Number of people) <sup>2</sup> | Obese population in 2005 (Number of people) <sup>3</sup> |
|---------------|-----------|------------------------------|--------------------------------------------------------------------|---------------------------------------------------------------|----------------------------------------------------------|
| Department 19 | 0-4       | 0.00309                      | 8023                                                               | 4011                                                          | 669                                                      |
|               | 5-9       | 0.00028                      | 12625                                                              | 2525                                                          | 1894                                                     |
|               | 10-14     | 0.00024                      | 12359                                                              | 2602                                                          | 650                                                      |
|               | 15-19     | 0.00181                      | 15988                                                              | 4290                                                          | 780                                                      |
|               | 20-24     | 0.00250                      | 16791                                                              | 4264                                                          | 267                                                      |
|               | 25-29     | 0.00302                      | 12214                                                              | 2748                                                          | 916                                                      |
|               | 30-34     | 0.00294                      | 5678                                                               | 4416                                                          | 631                                                      |
|               | 35-39     | 0.00275                      | 6428                                                               | 4628                                                          | 2057                                                     |
|               | 40-44     | 0.00321                      | 6412                                                               | 5855                                                          | 1115                                                     |
|               | 45-49     | 0.00387                      | 2931                                                               | 5210                                                          | 3582                                                     |
|               | 50-54     | 0.00425                      | 3056                                                               | 4232                                                          | 2586                                                     |
| 55-59         | 0.00776   | 2093                         | 3349                                                               | 1675                                                          |                                                          |
| Department 52 | 0-4       | 0.00270                      | 21147                                                              | 4614                                                          | 1153                                                     |
|               | 5-9       | 0.00015                      | 17964                                                              | 5716                                                          | 2450                                                     |
|               | 10-14     | 0.00019                      | 17781                                                              | 3704                                                          | 741                                                      |
|               | 15-19     | 0.00074                      | 23939                                                              | 4671                                                          | 1168                                                     |
|               | 20-24     | 0.00147                      | 30849                                                              | 7404                                                          | 1234                                                     |
|               | 25-29     | 0.00133                      | 14194                                                              | 10040                                                         | 1731                                                     |
|               | 30-34     | 0.00144                      | 9672                                                               | 8981                                                          | 2763                                                     |
|               | 35-39     | 0.00134                      | 7512                                                               | 14370                                                         | 1960                                                     |
|               | 40-44     | 0.00181                      | 6395                                                               | 11444                                                         | 3366                                                     |
|               | 45-49     | 0.00200                      | 4346                                                               | 8419                                                          | 7605                                                     |
|               | 50-54     | 0.00261                      | 5483                                                               | 6926                                                          | 4906                                                     |
| 55-59         | 0.00450   | 2058                         | 4889                                                               | 5146                                                          |                                                          |
| Department 76 | 0-4       | 0.00269                      | 108668                                                             | 25207                                                         | 9522                                                     |
|               | 5-9       | 0.00025                      | 133891                                                             | 29622                                                         | 17773                                                    |
|               | 10-14     | 0.00035                      | 136676                                                             | 21920                                                         | 10315                                                    |
|               | 15-19     | 0.00196                      | 144947                                                             | 35553                                                         | 5470                                                     |
|               | 20-24     | 0.00299                      | 131937                                                             | 28022                                                         | 8173                                                     |
|               | 25-29     | 0.00317                      | 94551                                                              | 44851                                                         | 16971                                                    |
|               | 30-34     | 0.00298                      | 80410                                                              | 48482                                                         | 24832                                                    |
|               | 35-39     | 0.00280                      | 64399                                                              | 65674                                                         | 28693                                                    |
|               | 40-44     | 0.00298                      | 46271                                                              | 69406                                                         | 32877                                                    |
|               | 45-49     | 0.00373                      | 38735                                                              | 68724                                                         | 31863                                                    |
|               | 50-54     | 0.00562                      | 32052                                                              | 49080                                                         | 30049                                                    |
| 55-59         | 0.00749   | 28441                        | 37289                                                              | 24017                                                         |                                                          |

†Values used in this table are for the urban population

<sup>1</sup> Initial value used in the stock of not-overweight population in 2005 for higher SES.

<sup>2</sup> Initial value used in the stock of overweight population in 2005 for higher SES.

<sup>3</sup> Initial value used in the stock of obese population in 2005 for higher SES.

## 1.5 Bogotá

### 1.5.1 Data and model parameters used

**Table 113. Prevalent rates of entire population by age group, gender, and body mass index category in 2005 (Bogotá)**

| Age Group | Nutritional State Male |           |         | Nutritional State Female |           |         |
|-----------|------------------------|-----------|---------|--------------------------|-----------|---------|
|           | Not-Overweigh          | Overweigh | Obese   | Not-Overweigh            | Overweigh | Obese   |
| 0-4       | 0.73188                | 0.21377   | 0.05435 | 0.74203                  | 0.20580   | 0.05217 |
| 5-9       | 0.82781                | 0.13245   | 0.03974 | 0.74675                  | 0.20779   | 0.04545 |
| 10-14     | 0.81197                | 0.13675   | 0.05128 | 0.82313                  | 0.16327   | 0.01361 |
| 15-19     | 0.89051                | 0.10219   | 0.00730 | 0.77340                  | 0.20197   | 0.02463 |
| 20-24     | 0.81780                | 0.14407   | 0.03814 | 0.71429                  | 0.24490   | 0.04082 |
| 25-29     | 0.67164                | 0.29851   | 0.02985 | 0.64537                  | 0.28435   | 0.07029 |
| 30-34     | 0.58599                | 0.36306   | 0.05096 | 0.54198                  | 0.32443   | 0.13359 |
| 35-39     | 0.50365                | 0.38686   | 0.10949 | 0.43798                  | 0.36822   | 0.19380 |
| 40-44     | 0.43511                | 0.44275   | 0.12214 | 0.38956                  | 0.42169   | 0.18876 |
| 45-49     | 0.35433                | 0.52756   | 0.11811 | 0.24180                  | 0.49180   | 0.26639 |
| 50-54     | 0.35000                | 0.46000   | 0.19000 | 0.22632                  | 0.43158   | 0.34211 |
| 55-59     | 0.41026                | 0.46154   | 0.12821 | 0.24800                  | 0.37600   | 0.37600 |

**Table 114. Prevalent rates of lower socioeconomic status population by age group, gender, and body mass index category in 2005 (Bogotá)**

| Age Group | Nutritional State Male |           |         | Nutritional State Female |           |         |
|-----------|------------------------|-----------|---------|--------------------------|-----------|---------|
|           | Not-Overweigh          | Overweigh | Obese   | Not-Overweigh            | Overweigh | Obese   |
| 0-4       | 0.68519                | 0.24074   | 0.07407 | 0.72727                  | 0.22727   | 0.04545 |
| 5-9       | 1.00000                | 0.00000   | 0.00000 | 0.64706                  | 0.29412   | 0.05882 |
| 10-14     | 1.00000                | 0.00000   | 0.00000 | 1.00000                  | 0.00000   | 0.00000 |
| 15-19     | 1.00000                | 0.00000   | 0.00000 | 0.76923                  | 0.23077   | 0.00000 |
| 20-24     | 0.82759                | 0.17241   | 0.00000 | 0.78846                  | 0.21154   | 0.00000 |
| 25-29     | 0.73077                | 0.23077   | 0.03846 | 0.58621                  | 0.31034   | 0.10345 |
| 30-34     | 0.46154                | 0.53846   | 0.00000 | 0.54167                  | 0.33333   | 0.12500 |
| 35-39     | 0.57143                | 0.35714   | 0.07143 | 0.41176                  | 0.38235   | 0.20588 |
| 40-44     | 0.64286                | 0.21429   | 0.14286 | 0.25000                  | 0.58333   | 0.16667 |
| 45-49     | 0.55556                | 0.44444   | 0.00000 | 0.52632                  | 0.36842   | 0.10526 |
| 50-54     | 0.58333                | 0.33333   | 0.08333 | 0.28571                  | 0.28571   | 0.42857 |
| 55-59     | 0.50000                | 0.00000   | 0.50000 | 0.50000                  | 0.50000   | 0.00000 |

**Table 115. Prevalent rates of middle socioeconomic status population by age group, gender, and body mass index category in 2005 (Bogotá)**

| Age Group | Nutritional State Male |           |         | Nutritional State Female |           |         |
|-----------|------------------------|-----------|---------|--------------------------|-----------|---------|
|           | Not-Overweigh          | Overweigh | Obese   | Not-Overweigh            | Overweigh | Obese   |
| 0-4       | 0.76623                | 0.19481   | 0.03896 | 0.72477                  | 0.22936   | 0.04587 |
| 5-9       | 0.83333                | 0.14286   | 0.02381 | 0.73529                  | 0.23529   | 0.02941 |
| 10-14     | 0.87500                | 0.12500   | 0.00000 | 0.75000                  | 0.22500   | 0.02500 |

|       |         |         |         |         |         |         |
|-------|---------|---------|---------|---------|---------|---------|
| 15-19 | 0.93333 | 0.06667 | 0.00000 | 0.64583 | 0.29167 | 0.06250 |
| 20-24 | 0.83333 | 0.11111 | 0.05556 | 0.67073 | 0.26829 | 0.06098 |
| 25-29 | 0.68182 | 0.31818 | 0.00000 | 0.60000 | 0.33684 | 0.06316 |
| 30-34 | 0.69697 | 0.30303 | 0.00000 | 0.58929 | 0.32143 | 0.08929 |
| 35-39 | 0.51852 | 0.29630 | 0.18519 | 0.42623 | 0.40984 | 0.16393 |
| 40-44 | 0.66667 | 0.29630 | 0.03704 | 0.44444 | 0.53333 | 0.02222 |
| 45-49 | 0.30769 | 0.46154 | 0.23077 | 0.22222 | 0.46667 | 0.31111 |
| 50-54 | 0.35714 | 0.50000 | 0.14286 | 0.15385 | 0.33333 | 0.51282 |
| 55-59 | 0.38462 | 0.46154 | 0.15385 | 0.36364 | 0.36364 | 0.27273 |

**Table 116. Prevalent rates of higher socioeconomic status population by age group, gender, and body mass index category in 2005 (Bogotá)**

| Age Group | Nutritional State Male |           |         | Nutritional State Female |           |         |
|-----------|------------------------|-----------|---------|--------------------------|-----------|---------|
|           | Not-Overweigh          | Overweigh | Obese   | Not-Overweigh            | Overweigh | Obese   |
| 0-4       | 0.73103                | 0.21379   | 0.05517 | 0.75882                  | 0.18235   | 0.05882 |
| 5-9       | 0.79787                | 0.14894   | 0.05319 | 0.76699                  | 0.18447   | 0.04854 |
| 10-14     | 0.75000                | 0.16667   | 0.08333 | 0.83505                  | 0.15464   | 0.01031 |
| 15-19     | 0.85870                | 0.13043   | 0.01087 | 0.81690                  | 0.16901   | 0.01408 |
| 20-24     | 0.81046                | 0.15033   | 0.03922 | 0.71292                  | 0.24402   | 0.04306 |
| 25-29     | 0.65649                | 0.30534   | 0.03817 | 0.67725                  | 0.25397   | 0.06878 |
| 30-34     | 0.56757                | 0.36036   | 0.07207 | 0.52747                  | 0.32418   | 0.14835 |
| 35-39     | 0.48958                | 0.41667   | 0.09375 | 0.44785                  | 0.34969   | 0.20245 |
| 40-44     | 0.33333                | 0.52222   | 0.14444 | 0.38542                  | 0.38542   | 0.22917 |
| 45-49     | 0.34783                | 0.55435   | 0.09783 | 0.21667                  | 0.51111   | 0.27222 |
| 50-54     | 0.31081                | 0.47297   | 0.21622 | 0.24306                  | 0.46528   | 0.29167 |
| 55-59     | 0.41270                | 0.47619   | 0.11111 | 0.21782                  | 0.37624   | 0.40594 |

**Table 117. Prevalent rates of entire population by age group, gender, and body mass index category in 2010 (Bogotá)**

| Age Group | Nutritional State Male |           |         | Nutritional State Female |           |         |
|-----------|------------------------|-----------|---------|--------------------------|-----------|---------|
|           | Not-Overweigh          | Overweigh | Obese   | Not-Overweigh            | Overweigh | Obese   |
| 0-4       | 0.69499                | 0.23747   | 0.06754 | 0.72785                  | 0.21308   | 0.05907 |
| 5-9       | 0.72990                | 0.15876   | 0.11134 | 0.74215                  | 0.20404   | 0.05381 |
| 10-14     | 0.75618                | 0.18198   | 0.06184 | 0.75388                  | 0.21705   | 0.02907 |
| 15-19     | 0.88367                | 0.10067   | 0.01566 | 0.78835                  | 0.17476   | 0.03689 |
| 20-24     | 0.79200                | 0.17333   | 0.03467 | 0.72187                  | 0.22293   | 0.05520 |
| 25-29     | 0.61538                | 0.29808   | 0.08654 | 0.61483                  | 0.29426   | 0.09091 |
| 30-34     | 0.50996                | 0.39044   | 0.09960 | 0.53598                  | 0.36228   | 0.10174 |
| 35-39     | 0.45652                | 0.43841   | 0.10507 | 0.45340                  | 0.41310   | 0.13350 |
| 40-44     | 0.41107                | 0.45455   | 0.13439 | 0.36203                  | 0.45316   | 0.18481 |
| 45-49     | 0.33929                | 0.48214   | 0.17857 | 0.30296                  | 0.46925   | 0.22779 |
| 50-54     | 0.34197                | 0.49741   | 0.16062 | 0.27640                  | 0.48447   | 0.23913 |
| 55-59     | 0.30519                | 0.47403   | 0.22078 | 0.20248                  | 0.41322   | 0.38430 |

**Table 118. Prevalent rates of lower socioeconomic status population by age group, gender, and body mass index category in 2010 (Bogotá)**

| Age Group | Nutritional State Male |           |         | Nutritional State Female |           |         |
|-----------|------------------------|-----------|---------|--------------------------|-----------|---------|
|           | Not-Overweigh          | Overweigh | Obese   | Not-Overweigh            | Overweigh | Obese   |
| 0-4       | 0.56000                | 0.32000   | 0.12000 | 0.68966                  | 0.24138   | 0.06897 |
| 5-9       | 0.77419                | 0.19355   | 0.03226 | 0.84211                  | 0.15789   | 0.00000 |
| 10-14     | 0.94444                | 0.05556   | 0.00000 | 0.87500                  | 0.12500   | 0.00000 |
| 15-19     | 0.93750                | 0.06250   | 0.00000 | 0.84211                  | 0.10526   | 0.05263 |
| 20-24     | 0.86667                | 0.13333   | 0.00000 | 0.75000                  | 0.16667   | 0.08333 |
| 25-29     | 0.62500                | 0.37500   | 0.00000 | 0.68182                  | 0.18182   | 0.13636 |
| 30-34     | 0.90000                | 0.10000   | 0.00000 | 0.45455                  | 0.45455   | 0.09091 |
| 35-39     | 0.66667                | 0.33333   | 0.00000 | 0.54545                  | 0.18182   | 0.27273 |
| 40-44     | 0.40000                | 0.20000   | 0.40000 | 0.28571                  | 0.71429   | 0.00000 |
| 45-49     | 0.50000                | 0.37500   | 0.12500 | 0.23077                  | 0.38462   | 0.38462 |
| 50-54     | 0.71429                | 0.28571   | 0.00000 | 1.00000                  | 0.00000   | 0.00000 |
| 55-59     | 0.50000                | 0.50000   | 0.00000 | 0.00000                  | 0.40000   | 0.60000 |

**Table 119. Prevalent rates of middle socioeconomic status population by age group, gender, and body mass index category in 2010 (Bogotá)**

| Age Group | Nutritional State Male |           |         | Nutritional State Female |           |         |
|-----------|------------------------|-----------|---------|--------------------------|-----------|---------|
|           | Not-Overweigh          | Overweigh | Obese   | Not-Overweigh            | Overweigh | Obese   |
| 0-4       | 0.69925                | 0.23308   | 0.06767 | 0.81746                  | 0.11905   | 0.06349 |
| 5-9       | 0.75258                | 0.11340   | 0.13402 | 0.76724                  | 0.18966   | 0.04310 |
| 10-14     | 0.81301                | 0.16260   | 0.02439 | 0.78788                  | 0.18182   | 0.03030 |
| 15-19     | 0.94203                | 0.04348   | 0.01449 | 0.75000                  | 0.24107   | 0.00893 |
| 20-24     | 0.82278                | 0.13924   | 0.03797 | 0.71963                  | 0.22430   | 0.05607 |
| 25-29     | 0.72941                | 0.20000   | 0.07059 | 0.53846                  | 0.37363   | 0.08791 |
| 30-34     | 0.57143                | 0.38776   | 0.04082 | 0.51250                  | 0.37500   | 0.11250 |
| 35-39     | 0.51923                | 0.42308   | 0.05769 | 0.48438                  | 0.34375   | 0.17188 |
| 40-44     | 0.48980                | 0.42857   | 0.08163 | 0.32394                  | 0.43662   | 0.23944 |
| 45-49     | 0.53125                | 0.34375   | 0.12500 | 0.38806                  | 0.40299   | 0.20896 |
| 50-54     | 0.36364                | 0.48485   | 0.15152 | 0.28947                  | 0.47368   | 0.23684 |
| 55-59     | 0.33333                | 0.52381   | 0.14286 | 0.21429                  | 0.21429   | 0.57143 |

**Table 120. Prevalent rates of higher socioeconomic status population by age group, gender, and body mass index category in 2010 (Bogotá)**

| Age Group | Nutritional State Male |           |         | Nutritional State Female |           |         |
|-----------|------------------------|-----------|---------|--------------------------|-----------|---------|
|           | Not-Overweigh          | Overweigh | Obese   | Not-Overweigh            | Overweigh | Obese   |
| 0-4       | 0.70432                | 0.23256   | 0.06312 | 0.69592                  | 0.24765   | 0.05643 |
| 5-9       | 0.71989                | 0.16807   | 0.11204 | 0.72669                  | 0.21222   | 0.06109 |
| 10-14     | 0.73176                | 0.19294   | 0.07529 | 0.73333                  | 0.23611   | 0.03056 |
| 15-19     | 0.87017                | 0.11326   | 0.01657 | 0.79688                  | 0.15885   | 0.04427 |
| 20-24     | 0.77936                | 0.18505   | 0.03559 | 0.72059                  | 0.22647   | 0.05294 |
| 25-29     | 0.57078                | 0.33333   | 0.09589 | 0.63279                  | 0.27869   | 0.08852 |
| 30-34     | 0.47396                | 0.40625   | 0.11979 | 0.54487                  | 0.35577   | 0.09936 |
| 35-39     | 0.43578                | 0.44495   | 0.11927 | 0.44410                  | 0.43478   | 0.12112 |
| 40-44     | 0.39196                | 0.46734   | 0.14070 | 0.37224                  | 0.45110   | 0.17666 |
| 45-49     | 0.29891                | 0.51087   | 0.19022 | 0.28969                  | 0.48468   | 0.22563 |
| 50-54     | 0.32026                | 0.50980   | 0.16993 | 0.26950                  | 0.48936   | 0.24113 |

|       |         |         |         |         |         |         |
|-------|---------|---------|---------|---------|---------|---------|
| 55-59 | 0.29771 | 0.46565 | 0.23664 | 0.20574 | 0.44019 | 0.35407 |
|-------|---------|---------|---------|---------|---------|---------|

**Table 121. Fraction of births for men by body mass index category, and socioeconomic status (Bogotá) †**

| Population group | Lower SES (%/year) | Middle SES (%/year) | Higher SES (%/year) | Complete Urban Population (%/year) |
|------------------|--------------------|---------------------|---------------------|------------------------------------|
| Not- overweight  | 50,00%             | 77,27%              | 78,57%              | 73,33%                             |
| Overweight       | 40,00%             | 13,64%              | 14,29%              | 18,33%                             |
| Obese            | 10,00%             | 9,09%               | 7,14%               | 8,33%                              |

† The fractions of births by each BMI category correspond to the prevalences by BMI category of children aged 0 to 12 months

**Table 122. Fraction of births for women by body mass index category and socioeconomic status (Bogotá) †**

| Population group | Lower SES (%/year) | Middle SES (%/year) | Higher SES (%/year) | Complete Urban Population (%/year) |
|------------------|--------------------|---------------------|---------------------|------------------------------------|
| Not- overweight  | 63,64%             | 81,25%              | 83,72%              | 80,00%                             |
| Overweight       | 18,18%             | 18,75%              | 11,63%              | 14,29%                             |
| Obese            | 18,18%             | 0,00%               | 4,65%               | 5,71%                              |

† The fractions of births by each BMI category correspond to the prevalences by BMI category of children aged 0 to 12 months

**Table 123. Mortality rates for men and population size by age group without segregate by socioeconomic status (Bogotá) †**

| Age group | Mortality rates (R) (%/year) | Not- overweight men in 2005 (Number of people) <sup>1</sup> | Overweight men in 2005 (Number of people) <sup>2</sup> | Obese men in 2005 (Number of people) <sup>3</sup> |
|-----------|------------------------------|-------------------------------------------------------------|--------------------------------------------------------|---------------------------------------------------|
| 0-4       | 0.00307                      | 221907                                                      | 64814                                                  | 16478                                             |
| 5-9       | 0.00033                      | 262469                                                      | 41995                                                  | 12599                                             |
| 10-14     | 0.00038                      | 263573                                                      | 44391                                                  | 16647                                             |
| 15-19     | 0.00275                      | 273307                                                      | 31363                                                  | 2240                                              |
| 20-24     | 0.00451                      | 251792                                                      | 44357                                                  | 11742                                             |
| 25-29     | 0.00478                      | 196181                                                      | 87192                                                  | 8719                                              |
| 30-34     | 0.00447                      | 150111                                                      | 93004                                                  | 13053                                             |
| 35-39     | 0.00378                      | 123651                                                      | 94978                                                  | 26881                                             |
| 40-44     | 0.00398                      | 100731                                                      | 102498                                                 | 28275                                             |
| 45-49     | 0.00447                      | 67880                                                       | 101066                                                 | 22627                                             |
| 50-54     | 0.00621                      | 52065                                                       | 68428                                                  | 28264                                             |
| 55-59     | 0.00823                      | 47031                                                       | 52910                                                  | 14697                                             |

† Values used in this table are for the urban population

<sup>1</sup> Initial value used in the stock of not-overweight population in 2005.

<sup>2</sup> Initial value used in the stock of overweight population in 2005.

<sup>3</sup> Initial value used in the stock of obese population in 2005.

**Table 124. Mortality rates for women and population size by age group without segregate by socioeconomic status (Bogotá) †**

| Age group | Mortality rates (R) (%/year) | Not- overweight women in 2005 (Number of people) <sup>1</sup> | Overweight women in 2005 (Number of people) <sup>2</sup> | Obese women in 2005 (Number of people) <sup>3</sup> |
|-----------|------------------------------|---------------------------------------------------------------|----------------------------------------------------------|-----------------------------------------------------|
| 0-4       | 0.00252                      | 215154                                                        | 59672                                                    | 15128                                               |
| 5-9       | 0.00019                      | 227389                                                        | 63274                                                    | 13841                                               |



|              |         |        |        |       |
|--------------|---------|--------|--------|-------|
| <b>10-14</b> | 0.00028 | 256595 | 50895  | 4241  |
| <b>15-19</b> | 0.00059 | 231695 | 60506  | 7379  |
| <b>20-24</b> | 0.00085 | 239490 | 82111  | 13685 |
| <b>25-29</b> | 0.00095 | 205086 | 90359  | 22336 |
| <b>30-34</b> | 0.00101 | 151898 | 90925  | 37440 |
| <b>35-39</b> | 0.00132 | 120719 | 101489 | 53415 |
| <b>40-44</b> | 0.00157 | 103922 | 112493 | 50354 |
| <b>45-49</b> | 0.00235 | 54921  | 111704 | 60506 |
| <b>50-54</b> | 0.00354 | 40398  | 77037  | 61066 |
| <b>55-59</b> | 0.00526 | 34180  | 51821  | 51821 |

<sup>†</sup>Values used in this table are for the urban population

<sup>1</sup> Initial value used in the stock of not-overweight population in 2005.

<sup>2</sup> Initial value used in the stock of overweight population in 2005.

<sup>3</sup> Initial value used in the stock of obese population in 2005.

**Table 125. Man mortality rates and population size by age group for the lower socioeconomic status population (Bogotá) <sup>†</sup>**

| Age group | Mortality rates (R) (%/year) | Not- overweight men in 2005 (Number of people) <sup>1</sup> | Overweight men in 2005 (Number of people) <sup>2</sup> | Obese men in 2005 (Number of people) <sup>3</sup> |
|-----------|------------------------------|-------------------------------------------------------------|--------------------------------------------------------|---------------------------------------------------|
| 0-4       | 0.00307                      | 40646                                                       | 14281                                                  | 4394                                              |
| 5-9       | 0.00033                      | 31496                                                       | 0                                                      | 0                                                 |
| 10-14     | 0.00038                      | 36068                                                       | 0                                                      | 0                                                 |
| 15-19     | 0.00275                      | 33603                                                       | 0                                                      | 0                                                 |
| 20-24     | 0.00451                      | 31311                                                       | 6523                                                   | 0                                                 |
| 25-29     | 0.00478                      | 27611                                                       | 8719                                                   | 1453                                              |
| 30-34     | 0.00447                      | 9790                                                        | 11422                                                  | 0                                                 |
| 35-39     | 0.00378                      | 14336                                                       | 8960                                                   | 1792                                              |
| 40-44     | 0.00398                      | 15905                                                       | 5302                                                   | 3534                                              |
| 45-49     | 0.00447                      | 7542                                                        | 6034                                                   | 0                                                 |
| 50-54     | 0.00621                      | 10413                                                       | 5950                                                   | 1488                                              |
| 55-59     | 0.00823                      | 1470                                                        | 0                                                      | 1470                                              |

<sup>†</sup>Values used in this table are for the urban population

<sup>1</sup> Initial value used in the stock of not-overweight population in 2005 for lower SES.

<sup>2</sup> Initial value used in the stock of overweight population in 2005 for lower SES.

<sup>3</sup> Initial value used in the stock of obese population in 2005 for lower SES.

**Table 126. Women mortality rates and population size by age group for the lower socioeconomic status population (Bogotá) <sup>†</sup>**

| Age group    | Mortality rates (R) (%/year) | Not- overweight women in 2005 (Number of people) <sup>1</sup> | Overweight women in 2005 (Number of people) <sup>2</sup> | Obese women in 2005 (Number of people) <sup>3</sup> |
|--------------|------------------------------|---------------------------------------------------------------|----------------------------------------------------------|-----------------------------------------------------|
| <b>0-4</b>   | 0.00252                      | 41258                                                         | 12893                                                    | 2579                                                |
| <b>5-9</b>   | 0.00019                      | 19573                                                         | 8897                                                     | 1779                                                |
| <b>10-14</b> | 0.00028                      | 34637                                                         | 0                                                        | 0                                                   |
| <b>15-19</b> | 0.00059                      | 25231                                                         | 7569                                                     | 0                                                   |
| <b>20-24</b> | 0.00085                      | 32485                                                         | 8715                                                     | 0                                                   |
| <b>25-29</b> | 0.00095                      | 24097                                                         | 12757                                                    | 4252                                                |
| <b>30-34</b> | 0.00101                      | 12570                                                         | 7735                                                     | 2901                                                |
| <b>35-39</b> | 0.00132                      | 11598                                                         | 10769                                                    | 5799                                                |
| <b>40-44</b> | 0.00157                      | 7127                                                          | 16631                                                    | 4752                                                |
| <b>45-49</b> | 0.00235                      | 8472                                                          | 5930                                                     | 1694                                                |
| <b>50-54</b> | 0.00354                      | 6120                                                          | 6120                                                     | 9180                                                |
| <b>55-59</b> | 0.00526                      | 1767                                                          | 1767                                                     | 0                                                   |

†Values used in this table are for the urban population

<sup>1</sup> Initial value used in the stock of not-overweight population in 2005 for lower SES.

<sup>2</sup> Initial value used in the stock of overweight population in 2005 for lower SES.

<sup>3</sup> Initial value used in the stock of obese population in 2005 for lower SES.

**Table 127. Man mortality rates and population size by age group for the middle socioeconomic status population (Bogotá) †**

| Age group | Mortality rates (R) (%/year) | Not- overweight men in 2005 (Number of people) <sup>1</sup> | Overweight men in 2005 (Number of people) <sup>2</sup> | Obese men in 2005 (Number of people) <sup>3</sup> |
|-----------|------------------------------|-------------------------------------------------------------|--------------------------------------------------------|---------------------------------------------------|
| 0-4       | 0.00307                      | 64814                                                       | 16478                                                  | 3296                                              |
| 5-9       | 0.00033                      | 73491                                                       | 12599                                                  | 2100                                              |
| 10-14     | 0.00038                      | 77685                                                       | 11098                                                  | 0                                                 |
| 15-19     | 0.00275                      | 62726                                                       | 4480                                                   | 0                                                 |
| 20-24     | 0.00451                      | 58708                                                       | 7828                                                   | 3914                                              |
| 25-29     | 0.00478                      | 43596                                                       | 20345                                                  | 0                                                 |
| 30-34     | 0.00447                      | 37528                                                       | 16316                                                  | 0                                                 |
| 35-39     | 0.00378                      | 25089                                                       | 14336                                                  | 8960                                              |
| 40-44     | 0.00398                      | 31810                                                       | 14138                                                  | 1767                                              |
| 45-49     | 0.00447                      | 12068                                                       | 18101                                                  | 9051                                              |
| 50-54     | 0.00621                      | 7438                                                        | 10413                                                  | 2975                                              |
| 55-59     | 0.00823                      | 7349                                                        | 8818                                                   | 2939                                              |

†Values used in this table are for the urban population

<sup>1</sup> Initial value used in the stock of not-overweight population in 2005 for middle SES.

<sup>2</sup> Initial value used in the stock of overweight population in 2005 for middle SES.

<sup>3</sup> Initial value used in the stock of obese population in 2005 for middle SES.

**Table 128. Women mortality rates and population size by age group for the middle socioeconomic status population (Bogotá) †**

| Age group | Mortality rates (R) (%/year) | Not- overweight women in 2005 (Number of people) <sup>1</sup> | Overweight women in 2005 (Number of people) <sup>2</sup> | Obese women in 2005 (Number of people) <sup>3</sup> |
|-----------|------------------------------|---------------------------------------------------------------|----------------------------------------------------------|-----------------------------------------------------|
| 0-4       | 0.00252                      | 58629                                                         | 18553                                                    | 3711                                                |
| 5-9       | 0.00019                      | 62277                                                         | 19929                                                    | 2491                                                |
| 10-14     | 0.00028                      | 63945                                                         | 19183                                                    | 2131                                                |
| 15-19     | 0.00059                      | 42368                                                         | 19134                                                    | 4100                                                |
| 20-24     | 0.00085                      | 51457                                                         | 20583                                                    | 4678                                                |
| 25-29     | 0.00095                      | 41738                                                         | 23432                                                    | 4394                                                |
| 30-34     | 0.00101                      | 34714                                                         | 18935                                                    | 5260                                                |
| 35-39     | 0.00132                      | 23153                                                         | 22262                                                    | 8905                                                |
| 40-44     | 0.00157                      | 24437                                                         | 29324                                                    | 1222                                                |
| 45-49     | 0.00235                      | 10333                                                         | 21700                                                    | 14466                                               |
| 50-54     | 0.00354                      | 3845                                                          | 8330                                                     | 12815                                               |
| 55-59     | 0.00526                      | 8353                                                          | 8353                                                     | 6265                                                |

†Values used in this table are for the urban population

<sup>1</sup> Initial value used in the stock of not-overweight population in 2005 for middle SES.

<sup>2</sup> Initial value used in the stock of overweight population in 2005 for middle SES.

<sup>3</sup> Initial value used in the stock of obese population in 2005 for middle SES.

**Table 129. Man mortality rates and population size by age group for the higher socioeconomic status population (Bogotá) †**

| Age group | Mortality rates (R) (%/year) | Not- overweight men in 2005 (Number of people) <sup>1</sup> | Overweight men in 2005 (Number of people) <sup>2</sup> | Obese men in 2005 (Number of people) <sup>3</sup> |
|-----------|------------------------------|-------------------------------------------------------------|--------------------------------------------------------|---------------------------------------------------|
|-----------|------------------------------|-------------------------------------------------------------|--------------------------------------------------------|---------------------------------------------------|

|       |         |        |       |       |
|-------|---------|--------|-------|-------|
| 0-4   | 0.00307 | 116446 | 34055 | 8788  |
| 5-9   | 0.00033 | 157482 | 29397 | 10499 |
| 10-14 | 0.00038 | 149820 | 33293 | 16647 |
| 15-19 | 0.00275 | 176977 | 26883 | 2240  |
| 20-24 | 0.00451 | 161773 | 30006 | 7828  |
| 25-29 | 0.00478 | 124975 | 58128 | 7266  |
| 30-34 | 0.00447 | 102794 | 65266 | 13053 |
| 35-39 | 0.00378 | 84226  | 71682 | 16128 |
| 40-44 | 0.00398 | 53016  | 83059 | 22974 |
| 45-49 | 0.00447 | 48270  | 76931 | 13576 |
| 50-54 | 0.00621 | 34214  | 52065 | 23801 |
| 55-59 | 0.00823 | 38213  | 44092 | 10288 |

†Values used in this table are for the urban population

<sup>1</sup> Initial value used in the stock of not-overweight population in 2005 for higher SES.

<sup>2</sup> Initial value used in the stock of overweight population in 2005 for higher SES.

<sup>3</sup> Initial value used in the stock of obese population in 2005 for higher SES.

**Table 130. Women mortality rates and population size by age group for the higher socioeconomic status population (Bogotá) †**

| Age group | Mortality rates (R) (%/year) | Not- overweight women in 2005 (Number of people) <sup>1</sup> | Overweight women in 2005 (Number of people) <sup>2</sup> | Obese women in 2005 (Number of people) <sup>3</sup> |
|-----------|------------------------------|---------------------------------------------------------------|----------------------------------------------------------|-----------------------------------------------------|
| 0-4       | 0.00252                      | 115592                                                        | 27778                                                    | 8961                                                |
| 5-9       | 0.00019                      | 145390                                                        | 34967                                                    | 9202                                                |
| 10-14     | 0.00028                      | 160192                                                        | 29665                                                    | 1978                                                |
| 15-19     | 0.00059                      | 164342                                                        | 34002                                                    | 2833                                                |
| 20-24     | 0.00085                      | 154965                                                        | 53042                                                    | 9360                                                |
| 25-29     | 0.00095                      | 140266                                                        | 52600                                                    | 14246                                               |
| 30-34     | 0.00101                      | 104517                                                        | 64235                                                    | 29396                                               |
| 35-39     | 0.00132                      | 86497                                                         | 67539                                                    | 39101                                               |
| 40-44     | 0.00157                      | 70638                                                         | 70638                                                    | 42001                                               |
| 45-49     | 0.00235                      | 35649                                                         | 84096                                                    | 44790                                               |
| 50-54     | 0.00354                      | 32105                                                         | 61459                                                    | 38526                                               |
| 55-59     | 0.00526                      | 24247                                                         | 41882                                                    | 45188                                               |

†Values used in this table are for the urban population

<sup>1</sup> Initial value used in the stock of not-overweight population in 2005 for higher SES.

<sup>2</sup> Initial value used in the stock of overweight population in 2005 for higher SES.

<sup>3</sup> Initial value used in the stock of obese population in 2005 for higher SES.

**Table 131. Data and projections of the Fertility rates (Bogotá) †**

| Year | Average Region Fecundity Rate | Year | Average Region Fecundity Rate | Year | Average Region Fecundity Rate |
|------|-------------------------------|------|-------------------------------|------|-------------------------------|
| 2005 | 1,985                         | 2014 | 1,908                         | 2023 | 1,896                         |
| 2006 | 1,968                         | 2015 | 1,907                         | 2024 | 1,894                         |
| 2007 | 1,951                         | 2016 | 1,905                         | 2025 | 1,893                         |
| 2008 | 1,934                         | 2017 | 1,904                         | 2026 | 1,891                         |
| 2009 | 1,929                         | 2018 | 1,903                         | 2027 | 1,890                         |
| 2010 | 1,924                         | 2019 | 1,901                         | 2028 | 1,889                         |
| 2011 | 1,919                         | 2020 | 1,900                         | 2029 | 1,887                         |
| 2012 | 1,914                         | 2021 | 1,898                         | 2030 | 1,886                         |
| 2013 | 1,910                         | 2022 | 1,897                         |      |                               |

† Data of Fertility rate of DANE [1] was used to forecast the fertility rate from 2005 to 2030. Holt-Winters no seasonal method in EViews 5 (Quantitative Micro Software, LLC) was used to forecast the fertility rate. In the SD model we used data from 2005 to 2030.

## 1.6 Orinoquia y Amazonia region

The Orinoquia y Amazonia region of Colombia is located in the south of the national territory and consists of eight departments, these are:

- Arauca (81)
- Casanare (85)
- Putumayo (86)
- Amazonas (91)
- Guainía (94)
- Guaviare (95)
- Vaupés (97)
- Vichada (99)

### 1.6.1 Data and model parameters used

**Table 132. Prevalent rates of entire population by age group, gender, and body mass index category in 2005 (Orinoquia y Amazonia region)**

| Age Group | Nutritional State Male |           |         | Nutritional State Female |           |         |
|-----------|------------------------|-----------|---------|--------------------------|-----------|---------|
|           | Not-Overweigh          | Overweigh | Obese   | Not-Overweigh            | Overweigh | Obese   |
| 0-4       | 0.78618                | 0.17171   | 0.04212 | 0.79330                  | 0.17207   | 0.03464 |
| 5-9       | 0.79037                | 0.15615   | 0.05348 | 0.83559                  | 0.13007   | 0.03434 |
| 10-14     | 0.81679                | 0.13959   | 0.04362 | 0.78942                  | 0.16667   | 0.04391 |
| 15-19     | 0.86639                | 0.10127   | 0.03235 | 0.75000                  | 0.20668   | 0.04332 |
| 20-24     | 0.71508                | 0.22533   | 0.05959 | 0.68852                  | 0.21816   | 0.09332 |
| 25-29     | 0.57197                | 0.33523   | 0.09280 | 0.59781                  | 0.27770   | 0.12449 |
| 30-34     | 0.42664                | 0.43341   | 0.13995 | 0.47958                  | 0.33434   | 0.18608 |
| 35-39     | 0.37275                | 0.44473   | 0.18252 | 0.34647                  | 0.40230   | 0.25123 |
| 40-44     | 0.35529                | 0.44706   | 0.19765 | 0.32513                  | 0.42004   | 0.25483 |
| 45-49     | 0.34270                | 0.43539   | 0.22191 | 0.26588                  | 0.42118   | 0.31294 |
| 50-54     | 0.33108                | 0.47635   | 0.19257 | 0.22188                  | 0.44681   | 0.33131 |
| 55-59     | 0.33333                | 0.41243   | 0.25424 | 0.24409                  | 0.37795   | 0.37795 |

**Table 133. Prevalent rates of lower socioeconomic status population by age group, gender, and body mass index category in 2005 (Orinoquia y Amazonia region)**

**Table 134. Prevalent rates of middle socioeconomic status population by age group, gender, and body mass index category in 2005 (Orinoquia y Amazonia region)**

| Age Group | Nutritional State Male |           |         | Nutritional State Female |           |         |
|-----------|------------------------|-----------|---------|--------------------------|-----------|---------|
|           | Not-Overweigh          | Overweigh | Obese   | Not-Overweigh            | Overweigh | Obese   |
| 0-4       | 0.74672                | 0.20524   | 0.04803 | 0.83920                  | 0.13568   | 0.02513 |
| 5-9       | 0.78667                | 0.15111   | 0.06222 | 0.79079                  | 0.14644   | 0.06276 |
| 10-14     | 0.76652                | 0.17181   | 0.06167 | 0.77459                  | 0.15574   | 0.06967 |
| 15-19     | 0.84242                | 0.12727   | 0.03030 | 0.74747                  | 0.20707   | 0.04545 |

| Age Group | Nutritional State Male |           |         | Nutritional State Female |           |         |
|-----------|------------------------|-----------|---------|--------------------------|-----------|---------|
|           | Not-Overweigh          | Overweigh | Obese   | Not-Overweigh            | Overweigh | Obese   |
| 0-4       | 0.81146                | 0.14972   | 0.03882 | 0.78246                  | 0.18421   | 0.03333 |
| 5-9       | 0.82648                | 0.14132   | 0.03220 | 0.87674                  | 0.10764   | 0.01563 |
| 10-14     | 0.85199                | 0.12334   | 0.02467 | 0.82011                  | 0.15344   | 0.02646 |
| 15-19     | 0.90226                | 0.07519   | 0.02256 | 0.73933                  | 0.22472   | 0.03596 |
| 20-24     | 0.76656                | 0.18612   | 0.04732 | 0.68396                  | 0.23113   | 0.08491 |
| 25-29     | 0.64639                | 0.30038   | 0.05323 | 0.54913                  | 0.30925   | 0.14162 |
| 30-34     | 0.49558                | 0.41150   | 0.09292 | 0.48882                  | 0.31949   | 0.19169 |
| 35-39     | 0.50279                | 0.37430   | 0.12291 | 0.36364                  | 0.38462   | 0.25175 |
| 40-44     | 0.49198                | 0.42246   | 0.08556 | 0.32549                  | 0.45490   | 0.21961 |
| 45-49     | 0.39752                | 0.39130   | 0.21118 | 0.28492                  | 0.45251   | 0.26257 |
| 50-54     | 0.39189                | 0.45946   | 0.14865 | 0.27660                  | 0.41844   | 0.30496 |
| 55-59     | 0.45349                | 0.40698   | 0.13953 | 0.25926                  | 0.41667   | 0.32407 |
| 20-24     | 0.63115                | 0.30328   | 0.06557 | 0.69082                  | 0.19807   | 0.11111 |
| 25-29     | 0.46429                | 0.38571   | 0.15000 | 0.61137                  | 0.28436   | 0.10427 |
| 30-34     | 0.40541                | 0.40541   | 0.18919 | 0.38503                  | 0.40107   | 0.21390 |
| 35-39     | 0.28814                | 0.52542   | 0.18644 | 0.35616                  | 0.36301   | 0.28082 |
| 40-44     | 0.34783                | 0.41739   | 0.23478 | 0.31288                  | 0.36196   | 0.32515 |
| 45-49     | 0.35106                | 0.44681   | 0.20213 | 0.23967                  | 0.40496   | 0.35537 |
| 50-54     | 0.32895                | 0.50000   | 0.17105 | 0.17391                  | 0.45652   | 0.36957 |
| 55-59     | 0.24324                | 0.45946   | 0.29730 | 0.26087                  | 0.33333   | 0.40580 |

**Table 135. Prevalent rates of higher socioeconomic status population by age group, gender, and body mass index category in 2005 (Orinoquia y Amazonia region)**

| Age Group | Nutritional State Male |           |         | Nutritional State Female |           |         |
|-----------|------------------------|-----------|---------|--------------------------|-----------|---------|
|           | Not-Overweigh          | Overweigh | Obese   | Not-Overweigh            | Overweigh | Obese   |
| 0-4       | 0.75641                | 0.19872   | 0.04487 | 0.76984                  | 0.17460   | 0.05556 |
| 5-9       | 0.66225                | 0.21854   | 0.11921 | 0.74658                  | 0.19178   | 0.06164 |
| 10-14     | 0.77301                | 0.14724   | 0.07975 | 0.71728                  | 0.21990   | 0.06283 |
| 15-19     | 0.79592                | 0.14286   | 0.06122 | 0.78182                  | 0.15758   | 0.06061 |
| 20-24     | 0.65306                | 0.25510   | 0.09184 | 0.69753                  | 0.20988   | 0.09259 |
| 25-29     | 0.53600                | 0.35200   | 0.11200 | 0.67816                  | 0.20690   | 0.11494 |
| 30-34     | 0.30189                | 0.50943   | 0.18868 | 0.57143                  | 0.28571   | 0.14286 |
| 35-39     | 0.22826                | 0.47826   | 0.29348 | 0.31073                  | 0.46328   | 0.22599 |
| 40-44     | 0.15447                | 0.51220   | 0.33333 | 0.33775                  | 0.42384   | 0.23841 |
| 45-49     | 0.24752                | 0.49505   | 0.25743 | 0.26400                  | 0.39200   | 0.34400 |
| 50-54     | 0.20833                | 0.48611   | 0.30556 | 0.18750                  | 0.47917   | 0.33333 |
| 55-59     | 0.20370                | 0.38889   | 0.40741 | 0.20779                  | 0.36364   | 0.42857 |

**Table 136. Prevalent rates of entire population by age group, gender, and body mass index category in 2010 (Orinoquia y Amazonia region)**

| Age Group | Nutritional State Male |           |         | Nutritional State Female |           |         |
|-----------|------------------------|-----------|---------|--------------------------|-----------|---------|
|           | Not-Overweigh          | Overweigh | Obese   | Not-Overweigh            | Overweigh | Obese   |
| 0-4       | 0.69989                | 0.23068   | 0.06943 | 0.76251                  | 0.19702   | 0.04047 |

|       |         |         |         |         |         |         |
|-------|---------|---------|---------|---------|---------|---------|
| 5-9   | 0.73990 | 0.18325 | 0.07685 | 0.81022 | 0.14703 | 0.04275 |
| 10-14 | 0.79958 | 0.14376 | 0.05666 | 0.76560 | 0.18904 | 0.04537 |
| 15-19 | 0.85432 | 0.11358 | 0.03210 | 0.74685 | 0.20273 | 0.05042 |
| 20-24 | 0.66436 | 0.26471 | 0.07093 | 0.64390 | 0.26308 | 0.09302 |
| 25-29 | 0.42458 | 0.43575 | 0.13966 | 0.51935 | 0.33780 | 0.14286 |
| 30-34 | 0.36640 | 0.43117 | 0.20243 | 0.41021 | 0.39868 | 0.19110 |
| 35-39 | 0.34112 | 0.48131 | 0.17757 | 0.31979 | 0.45760 | 0.22261 |
| 40-44 | 0.27569 | 0.47870 | 0.24561 | 0.28544 | 0.40613 | 0.30843 |
| 45-49 | 0.29589 | 0.44110 | 0.26301 | 0.25285 | 0.42825 | 0.31891 |
| 50-54 | 0.26374 | 0.47985 | 0.25641 | 0.22161 | 0.43767 | 0.34072 |
| 55-59 | 0.29534 | 0.45078 | 0.25389 | 0.26033 | 0.40083 | 0.33884 |

Table 137.

Prevalent rates of lower socioeconomic status population by age group, gender, and body mass index category in 2010 (Orinoquia y Amazonia region)

| Age Group | Nutritional State Male |           |         | Nutritional State Female |           |         |
|-----------|------------------------|-----------|---------|--------------------------|-----------|---------|
|           | Not-Overweigh          | Overweigh | Obese   | Not-Overweigh            | Overweigh | Obese   |
| 0-4       | 0.69618                | 0.24275   | 0.06107 | 0.74408                  | 0.21450   | 0.04142 |
| 5-9       | 0.74402                | 0.19269   | 0.06329 | 0.82132                  | 0.13213   | 0.04655 |
| 10-14     | 0.81399                | 0.13244   | 0.05357 | 0.78691                  | 0.17409   | 0.03900 |
| 15-19     | 0.86404                | 0.10555   | 0.03041 | 0.74620                  | 0.21277   | 0.04103 |
| 20-24     | 0.69388                | 0.24745   | 0.05867 | 0.61895                  | 0.28842   | 0.09263 |
| 25-29     | 0.43526                | 0.43251   | 0.13223 | 0.47381                  | 0.36667   | 0.15952 |
| 30-34     | 0.42105                | 0.41118   | 0.16776 | 0.40970                  | 0.39892   | 0.19137 |
| 35-39     | 0.41176                | 0.42647   | 0.16176 | 0.29641                  | 0.48204   | 0.22156 |
| 40-44     | 0.32189                | 0.45494   | 0.22318 | 0.26667                  | 0.41818   | 0.31515 |
| 45-49     | 0.38462                | 0.38914   | 0.22624 | 0.28745                  | 0.40081   | 0.31174 |
| 50-54     | 0.28902                | 0.47399   | 0.23699 | 0.20737                  | 0.46544   | 0.32719 |
| 55-59     | 0.31148                | 0.45082   | 0.23770 | 0.30282                  | 0.40141   | 0.29577 |

Table 138. Prevalent rates of middle socioeconomic status population by age group, gender, and body mass index category in 2010 (Orinoquia y Amazonia region)

| Age Group | Nutritional State Male |           |         | Nutritional State Female |           |         |
|-----------|------------------------|-----------|---------|--------------------------|-----------|---------|
|           | Not-Overweigh          | Overweigh | Obese   | Not-Overweigh            | Overweigh | Obese   |
| 0-4       | 0.69588                | 0.20619   | 0.09794 | 0.80193                  | 0.16425   | 0.03382 |
| 5-9       | 0.72174                | 0.18261   | 0.09565 | 0.77727                  | 0.19091   | 0.03182 |
| 10-14     | 0.78404                | 0.15493   | 0.06103 | 0.73600                  | 0.20400   | 0.06000 |
| 15-19     | 0.85326                | 0.10870   | 0.03804 | 0.77578                  | 0.16143   | 0.06278 |
| 20-24     | 0.60274                | 0.29452   | 0.10274 | 0.70414                  | 0.20118   | 0.09467 |
| 25-29     | 0.41304                | 0.41304   | 0.17391 | 0.60825                  | 0.29381   | 0.09794 |
| 30-34     | 0.30282                | 0.43662   | 0.26056 | 0.40341                  | 0.38636   | 0.21023 |
| 35-39     | 0.25664                | 0.54867   | 0.19469 | 0.40120                  | 0.38922   | 0.20958 |
| 40-44     | 0.24561                | 0.45614   | 0.29825 | 0.29323                  | 0.39850   | 0.30827 |
| 45-49     | 0.18557                | 0.45361   | 0.36082 | 0.20149                  | 0.44776   | 0.35075 |
| 50-54     | 0.22581                | 0.50000   | 0.27419 | 0.22105                  | 0.35789   | 0.42105 |
| 55-59     | 0.30000                | 0.42000   | 0.28000 | 0.21739                  | 0.40580   | 0.37681 |

Table 139. Prevalent rates of higher socioeconomic status population by age group, gender, and body mass index category in 2010 (Orinoquia y Amazonia region)

| Age Group | Nutritional State Male |           |         | Nutritional State Female |           |         |
|-----------|------------------------|-----------|---------|--------------------------|-----------|---------|
|           | Not-Overweigh          | Overweigh | Obese   | Not-Overweigh            | Overweigh | Obese   |
| 0-4       | 0.77273                | 0.15909   | 0.06818 | 0.83929                  | 0.10714   | 0.05357 |
| 5-9       | 0.75676                | 0.09459   | 0.14865 | 0.80822                  | 0.15068   | 0.04110 |
| 10-14     | 0.70588                | 0.22059   | 0.07353 | 0.67778                  | 0.26667   | 0.05556 |
| 15-19     | 0.77612                | 0.19403   | 0.02985 | 0.66197                  | 0.23944   | 0.09859 |
| 20-24     | 0.60000                | 0.32500   | 0.07500 | 0.68182                  | 0.22727   | 0.09091 |
| 25-29     | 0.36111                | 0.55556   | 0.08333 | 0.55172                  | 0.27586   | 0.17241 |
| 30-34     | 0.20833                | 0.54167   | 0.25000 | 0.43333                  | 0.43333   | 0.13333 |
| 35-39     | 0.11628                | 0.65116   | 0.23256 | 0.23077                  | 0.50769   | 0.26154 |
| 40-44     | 0.13462                | 0.63462   | 0.23077 | 0.37288                  | 0.35593   | 0.27119 |
| 45-49     | 0.10638                | 0.65957   | 0.23404 | 0.22414                  | 0.50000   | 0.27586 |
| 50-54     | 0.21053                | 0.47368   | 0.31579 | 0.28571                  | 0.46939   | 0.24490 |
| 55-59     | 0.19048                | 0.52381   | 0.28571 | 0.16129                  | 0.38710   | 0.45161 |

**Table 140. Fraction of births for men by body mass index category, and socioeconomic status (Orinoquia y Amazonia region) †**

| Population group | Lower SES (%/year) | Middle SES (%/year) | Higher SES (%/year) | Complete Urban Population (%/year) |
|------------------|--------------------|---------------------|---------------------|------------------------------------|
| Not- overweight  | 82,17%             | 82,50%              | 74,36%              | 80,77%                             |
| Overweight       | 13,95%             | 15,00%              | 20,51%              | 15,38%                             |
| Obese            | 3,88%              | 2,50%               | 5,13%               | 3,85%                              |

† The fractions of births by each BMI category correspond to the prevalences by BMI category of children aged 0 to 12 months

**Table 141. Fraction of births for women by body mass index category and socioeconomic status (Orinoquia y Amazonia region) †**

| Population group | Lower SES (%/year) | Middle SES (%/year) | Higher SES (%/year) | Complete Urban Population (%/year) |
|------------------|--------------------|---------------------|---------------------|------------------------------------|
| Not- overweight  | 82,35%             | 86,44%              | 67,74%              | 81,34%                             |
| Overweight       | 14,29%             | 13,56%              | 25,81%              | 15,79%                             |
| Obese            | 3,36%              | 0,00%               | 6,45%               | 2,87%                              |

† The fractions of births by each BMI category correspond to the prevalences by BMI category of children aged 0 to 12 months

**Table 142. Mortality rates for men and population size by age group without segregate by socioeconomic status (Orinoquia y Amazonia region) †**

| Age group | Mortality rates (R) (%/year) | Not- overweight men in 2005 (Number of people)1 | Overweight men in 2005 (Number of people)2 | Obese men in 2005 (Number of people)3 |
|-----------|------------------------------|-------------------------------------------------|--------------------------------------------|---------------------------------------|
| 0-4       | 0.00350                      | 29652                                           | 6476                                       | 1589                                  |
| 5-9       | 0.00043                      | 29523                                           | 5833                                       | 1997                                  |
| 10-14     | 0.00022                      | 30309                                           | 5180                                       | 1619                                  |
| 15-19     | 0.00174                      | 27827                                           | 3252                                       | 1039                                  |
| 20-24     | 0.00513                      | 18532                                           | 5840                                       | 1544                                  |
| 25-29     | 0.00426                      | 12877                                           | 7547                                       | 2089                                  |
| 30-34     | 0.00426                      | 8514                                            | 8649                                       | 2793                                  |
| 35-39     | 0.00307                      | 6927                                            | 8264                                       | 3392                                  |
| 40-44     | 0.00421                      | 5822                                            | 7326                                       | 3239                                  |

| Age group | Mortality rates (R) (%/year) | Not- overweight men in 2005 (Number of people) <sup>1</sup> | Overweight men in 2005 (Number of people) <sup>2</sup> | Obese men in 2005 (Number of people) <sup>3</sup> |
|-----------|------------------------------|-------------------------------------------------------------|--------------------------------------------------------|---------------------------------------------------|
| 45-49     | 0.00342                      | 4415                                                        | 5609                                                   | 2859                                              |
| 50-54     | 0.00538                      | 3202                                                        | 4606                                                   | 1862                                              |
| 55-59     | 0.00882                      | 2380                                                        | 2945                                                   | 1815                                              |

<sup>†</sup>Values used in this table are for the urban population

<sup>1</sup> Initial value used in the stock of not-overweight population in 2005.

<sup>2</sup> Initial value used in the stock of overweight population in 2005.

<sup>3</sup> Initial value used in the stock of obese population in 2005.

**Table 143. Mortality rates for women and population size by age group without segregate by socioeconomic status (Orinoquia y Amazonia region) <sup>†</sup>**

| Age group | Mortality rates (R) (%/year) | Not- overweight women in 2005 (Number of people) <sup>1</sup> | Overweight women in 2005 (Number of people) <sup>2</sup> | Obese women in 2005 (Number of people) <sup>3</sup> |
|-----------|------------------------------|---------------------------------------------------------------|----------------------------------------------------------|-----------------------------------------------------|
| 0-4       | 0.00359                      | 29193                                                         | 6332                                                     | 1275                                                |
| 5-9       | 0.00032                      | 31109                                                         | 4843                                                     | 1278                                                |
| 10-14     | 0.00043                      | 29513                                                         | 6231                                                     | 1642                                                |
| 15-19     | 0.00089                      | 25369                                                         | 6991                                                     | 1465                                                |
| 20-24     | 0.00129                      | 18722                                                         | 5932                                                     | 2537                                                |
| 25-29     | 0.00132                      | 14483                                                         | 6728                                                     | 3016                                                |
| 30-34     | 0.00175                      | 10686                                                         | 7450                                                     | 4146                                                |
| 35-39     | 0.00126                      | 7122                                                          | 8270                                                     | 5164                                                |
| 40-44     | 0.00136                      | 5725                                                          | 7396                                                     | 4487                                                |
| 45-49     | 0.00243                      | 3613                                                          | 5724                                                     | 4253                                                |
| 50-54     | 0.00472                      | 2210                                                          | 4450                                                     | 3299                                                |
| 55-59     | 0.00699                      | 1815                                                          | 2811                                                     | 2811                                                |

<sup>†</sup>Values used in this table are for the urban population

<sup>1</sup> Initial value used in the stock of not-overweight population in 2005.

<sup>2</sup> Initial value used in the stock of overweight population in 2005.

<sup>3</sup> Initial value used in the stock of obese population in 2005.

**Table 144. Man mortality rates and population size by age group for the lower socioeconomic status population (Orinoquia y Amazonia region) <sup>†</sup>**

| Age group | Mortality rates (R) (%/year) | Not- overweight men in 2005 (Number of people) <sup>1</sup> | Overweight men in 2005 (Number of people) <sup>2</sup> | Obese men in 2005 (Number of people) <sup>3</sup> |
|-----------|------------------------------|-------------------------------------------------------------|--------------------------------------------------------|---------------------------------------------------|
| 0-4       | 0.00350                      | 17881                                                       | 3299                                                   | 855                                               |
| 5-9       | 0.00043                      | 18457                                                       | 3156                                                   | 719                                               |
| 10-14     | 0.00022                      | 18169                                                       | 2630                                                   | 526                                               |
| 15-19     | 0.00174                      | 16262                                                       | 1355                                                   | 407                                               |
| 20-24     | 0.00513                      | 11727                                                       | 2847                                                   | 724                                               |
| 25-29     | 0.00426                      | 7249                                                        | 3368                                                   | 597                                               |
| 30-34     | 0.00426                      | 5045                                                        | 4189                                                   | 946                                               |
| 35-39     | 0.00307                      | 4299                                                        | 3201                                                   | 1051                                              |
| 40-44     | 0.00421                      | 3547                                                        | 3046                                                   | 617                                               |
| 45-49     | 0.00342                      | 2316                                                        | 2280                                                   | 1230                                              |
| 50-54     | 0.00538                      | 1895                                                        | 2221                                                   | 719                                               |
| 55-59     | 0.00882                      | 1573                                                        | 1412                                                   | 484                                               |

<sup>†</sup>Values used in this table are for the urban population

<sup>1</sup> Initial value used in the stock of not-overweight population in 2005 for lower SES.

<sup>2</sup> Initial value used in the stock of overweight population in 2005 for lower SES.

<sup>3</sup> Initial value used in the stock of obese population in 2005 for lower SES.



**Table 145. Women mortality rates and population size by age group for the lower socioeconomic status population (Orinoquia y Amazonia region) †**

| Age group | Mortality rates (R) (%/year) | Not- overweight women in 2005 (Number of people) <sup>1</sup> | Overweight women in 2005 (Number of people) <sup>2</sup> | Obese women in 2005 (Number of people) <sup>3</sup> |
|-----------|------------------------------|---------------------------------------------------------------|----------------------------------------------------------|-----------------------------------------------------|
| 0-4       | 0.00359                      | 16823                                                         | 3960                                                     | 717                                                 |
| 5-9       | 0.00032                      | 19515                                                         | 2396                                                     | 348                                                 |
| 10-14     | 0.00043                      | 17621                                                         | 3297                                                     | 568                                                 |
| 15-19     | 0.00089                      | 14034                                                         | 4266                                                     | 682                                                 |
| 20-24     | 0.00129                      | 10978                                                         | 3710                                                     | 1363                                                |
| 25-29     | 0.00132                      | 6627                                                          | 3732                                                     | 1709                                                |
| 30-34     | 0.00175                      | 5557                                                          | 3632                                                     | 2179                                                |
| 35-39     | 0.00126                      | 3440                                                          | 3638                                                     | 2381                                                |
| 40-44     | 0.00136                      | 2522                                                          | 3524                                                     | 1701                                                |
| 45-49     | 0.00243                      | 1751                                                          | 2781                                                     | 1614                                                |
| 50-54     | 0.00472                      | 1377                                                          | 2084                                                     | 1519                                                |
| 55-59     | 0.00699                      | 937                                                           | 1506                                                     | 1171                                                |

†Values used in this table are for the urban population

<sup>1</sup> Initial value used in the stock of not-overweight population in 2005 for lower SES.

<sup>2</sup> Initial value used in the stock of overweight population in 2005 for lower SES.

<sup>3</sup> Initial value used in the stock of obese population in 2005 for lower SES.

**Table 146. Man mortality rates and population size by age group for the middle socioeconomic status population (Orinoquia y Amazonia region) †**

| Age group | Mortality rates (R) (%/year) | Not- overweight men in 2005 (Number of people) <sup>1</sup> | Overweight men in 2005 (Number of people) <sup>2</sup> | Obese men in 2005 (Number of people) <sup>3</sup> |
|-----------|------------------------------|-------------------------------------------------------------|--------------------------------------------------------|---------------------------------------------------|
| 0-4       | 0.00350                      | 6965                                                        | 1914                                                   | 448                                               |
| 5-9       | 0.00043                      | 7071                                                        | 1358                                                   | 559                                               |
| 10-14     | 0.00022                      | 7041                                                        | 1578                                                   | 567                                               |
| 15-19     | 0.00174                      | 6279                                                        | 949                                                    | 226                                               |
| 20-24     | 0.00513                      | 3716                                                        | 1786                                                   | 386                                               |
| 25-29     | 0.00426                      | 2771                                                        | 2302                                                   | 895                                               |
| 30-34     | 0.00426                      | 2027                                                        | 2027                                                   | 946                                               |
| 35-39     | 0.00307                      | 1624                                                        | 2962                                                   | 1051                                              |
| 40-44     | 0.00421                      | 1542                                                        | 1851                                                   | 1041                                              |
| 45-49     | 0.00342                      | 1194                                                        | 1520                                                   | 688                                               |
| 50-54     | 0.00538                      | 817                                                         | 1241                                                   | 425                                               |
| 55-59     | 0.00882                      | 363                                                         | 686                                                    | 444                                               |

†Values used in this table are for the urban population

<sup>1</sup> Initial value used in the stock of not-overweight population in 2005 for middle SES.

<sup>2</sup> Initial value used in the stock of overweight population in 2005 for middle SES.

<sup>3</sup> Initial value used in the stock of obese population in 2005 for middle SES.

**Table 147. Women mortality rates and population size by age group for the middle socioeconomic status population (Orinoquia y Amazonia region) †**

| Age group | Mortality rates (R) (%/year) | Not- overweight women in 2005 (Number of people) <sup>1</sup> | Overweight women in 2005 (Number of people) <sup>2</sup> | Obese women in 2005 (Number of people) <sup>3</sup> |
|-----------|------------------------------|---------------------------------------------------------------|----------------------------------------------------------|-----------------------------------------------------|
| 0-4       | 0.00359                      | 7637                                                          | 1235                                                     | 229                                                 |
| 5-9       | 0.00032                      | 7085                                                          | 1312                                                     | 562                                                 |
| 10-14     | 0.00043                      | 7169                                                          | 1441                                                     | 645                                                 |
| 15-19     | 0.00089                      | 5867                                                          | 1625                                                     | 357                                                 |
| 20-24     | 0.00129                      | 4268                                                          | 1224                                                     | 686                                                 |

|       |         |      |      |      |
|-------|---------|------|------|------|
| 25-29 | 0.00132 | 3927 | 1827 | 670  |
| 30-34 | 0.00175 | 2150 | 2239 | 1194 |
| 35-39 | 0.00126 | 2221 | 2264 | 1751 |
| 40-44 | 0.00136 | 1491 | 1725 | 1549 |
| 45-49 | 0.00243 | 860  | 1453 | 1275 |
| 50-54 | 0.00472 | 445  | 1167 | 945  |
| 55-59 | 0.00699 | 406  | 518  | 631  |

†Values used in this table are for the urban population

1 Initial value used in the stock of not-overweight population in 2005 for middle SES.

2 Initial value used in the stock of overweight population in 2005 for middle SES.

3 Initial value used in the stock of obese population in 2005 for middle SES.

**Table 148. Man mortality rates and population size by age group for the higher socioeconomic status population (Orinoquia y Amazonia region) †**

| Age group | Mortality rates (R) (%/year) | Not- overweight men in 2005 (Number of people) <sup>1</sup> | Overweight men in 2005 (Number of people) <sup>2</sup> | Obese men in 2005 (Number of people) <sup>3</sup> |
|-----------|------------------------------|-------------------------------------------------------------|--------------------------------------------------------|---------------------------------------------------|
| 0-4       | 0.00350                      | 4806                                                        | 1263                                                   | 285                                               |
| 5-9       | 0.00043                      | 3995                                                        | 1318                                                   | 719                                               |
| 10-14     | 0.00022                      | 5099                                                        | 971                                                    | 526                                               |
| 15-19     | 0.00174                      | 5285                                                        | 949                                                    | 407                                               |
| 20-24     | 0.00513                      | 3089                                                        | 1207                                                   | 434                                               |
| 25-29     | 0.00426                      | 2857                                                        | 1876                                                   | 597                                               |
| 30-34     | 0.00426                      | 1442                                                        | 2433                                                   | 901                                               |
| 35-39     | 0.00307                      | 1003                                                        | 2102                                                   | 1290                                              |
| 40-44     | 0.00421                      | 733                                                         | 2429                                                   | 1581                                              |
| 45-49     | 0.00342                      | 905                                                         | 1809                                                   | 941                                               |
| 50-54     | 0.00538                      | 490                                                         | 1143                                                   | 719                                               |
| 55-59     | 0.00882                      | 444                                                         | 847                                                    | 887                                               |

†Values used in this table are for the urban population

<sup>1</sup> Initial value used in the stock of not-overweight population in 2005 for higher SES.

<sup>2</sup> Initial value used in the stock of overweight population in 2005 for higher SES.

<sup>3</sup> Initial value used in the stock of obese population in 2005 for higher SES.

**Table 149. Women mortality rates and population size by age group for the higher socioeconomic status population (Orinoquia y Amazonia region) †**

| Age group | Mortality rates (R) (%/year) | Not- overweight women in 2005 (Number of people) <sup>1</sup> | Overweight women in 2005 (Number of people) <sup>2</sup> | Obese women in 2005 (Number of people) <sup>3</sup> |
|-----------|------------------------------|---------------------------------------------------------------|----------------------------------------------------------|-----------------------------------------------------|
| 0-4       | 0.00359                      | 4773                                                          | 1082                                                     | 344                                                 |
| 5-9       | 0.00032                      | 4489                                                          | 1153                                                     | 371                                                 |
| 10-14     | 0.00043                      | 4767                                                          | 1461                                                     | 418                                                 |
| 15-19     | 0.00089                      | 5468                                                          | 1102                                                     | 424                                                 |
| 20-24     | 0.00129                      | 3461                                                          | 1041                                                     | 459                                                 |
| 25-29     | 0.00132                      | 3890                                                          | 1187                                                     | 659                                                 |
| 30-34     | 0.00175                      | 3047                                                          | 1523                                                     | 762                                                 |
| 35-39     | 0.00126                      | 1511                                                          | 2252                                                     | 1099                                                |
| 40-44     | 0.00136                      | 1721                                                          | 2160                                                     | 1215                                                |
| 45-49     | 0.00243                      | 1018                                                          | 1511                                                     | 1326                                                |
| 50-54     | 0.00472                      | 454                                                           | 1161                                                     | 807                                                 |
| 55-59     | 0.00699                      | 471                                                           | 825                                                      | 972                                                 |

†Values used in this table are for the urban population

<sup>1</sup> Initial value used in the stock of not-overweight population in 2005 for higher SES.

<sup>2</sup> Initial value used in the stock of overweight population in 2005 for higher SES.

<sup>3</sup> Initial value used in the stock of obese population in 2005 for higher SES.

**Table 150. Data and projections of the Fertility rates by department and Region (Orinoquia y Amazonia region)<sup>†</sup>**

| Year | Fecundity Rate Depto 81 | Fecundity Rate Depto 85 | Fecundity Rate Depto 86 | Fecundity Rate Depto 91 | Fecundity Rate Depto 94 | Fecundity Rate Depto 95 | Fecundity Rate Depto 97 | Fecundity Rate Depto 99 | Average Region Fecundity Rate |
|------|-------------------------|-------------------------|-------------------------|-------------------------|-------------------------|-------------------------|-------------------------|-------------------------|-------------------------------|
| 2005 | 4,0058                  | 3,1197                  | 3,5644                  | 4,3448                  | 4,3448                  | 4,3448                  | 4,3448                  | 4,3448                  | 4,052                         |
| 2006 | 3,9757                  | 3,0478                  | 3,4811                  | 4,2532                  | 4,2532                  | 4,2532                  | 4,2532                  | 4,2532                  | 3,971                         |
| 2007 | 3,9456                  | 2,9759                  | 3,3978                  | 4,1616                  | 4,1616                  | 4,1616                  | 4,1616                  | 4,1616                  | 3,891                         |
| 2008 | 3,9155                  | 2,904                   | 3,3145                  | 4,07                    | 4,07                    | 4,07                    | 4,07                    | 4,07                    | 3,811                         |
| 2009 | 3,862                   | 2,8585                  | 3,262                   | 3,9922                  | 3,9922                  | 3,9922                  | 3,9922                  | 3,9922                  | 3,743                         |
| 2010 | 3,8085                  | 2,813                   | 3,2095                  | 3,9144                  | 3,9144                  | 3,9144                  | 3,9144                  | 3,9144                  | 3,675                         |
| 2011 | 3,755                   | 2,7675                  | 3,157                   | 3,8366                  | 3,8366                  | 3,8366                  | 3,8366                  | 3,8366                  | 3,608                         |
| 2012 | 3,7015                  | 2,722                   | 3,1045                  | 3,7588                  | 3,7588                  | 3,7588                  | 3,7588                  | 3,7588                  | 3,540                         |
| 2013 | 3,648                   | 2,6765                  | 3,052                   | 3,681                   | 3,681                   | 3,681                   | 3,681                   | 3,681                   | 3,473                         |
| 2014 | 3,5732                  | 2,6495                  | 3,0211                  | 3,6205                  | 3,6205                  | 3,6205                  | 3,6205                  | 3,6205                  | 3,418                         |
| 2015 | 3,4984                  | 2,6225                  | 2,9902                  | 3,56                    | 3,56                    | 3,56                    | 3,56                    | 3,56                    | 3,364                         |
| 2016 | 3,4236                  | 2,5955                  | 2,9593                  | 3,4995                  | 3,4995                  | 3,4995                  | 3,4995                  | 3,4995                  | 3,309                         |
| 2017 | 3,3488                  | 2,5685                  | 2,9284                  | 3,439                   | 3,439                   | 3,439                   | 3,439                   | 3,439                   | 3,255                         |
| 2018 | 3,274                   | 2,5415                  | 2,8975                  | 3,3785                  | 3,3785                  | 3,3785                  | 3,3785                  | 3,3785                  | 3,201                         |
| 2019 | 3,1992                  | 2,5145                  | 2,8666                  | 3,318                   | 3,318                   | 3,318                   | 3,318                   | 3,318                   | 3,146                         |
| 2020 | 3,1244                  | 2,4875                  | 2,8357                  | 3,2575                  | 3,2575                  | 3,2575                  | 3,2575                  | 3,2575                  | 3,092                         |
| 2021 | 3,0496                  | 2,4605                  | 2,8048                  | 3,197                   | 3,197                   | 3,197                   | 3,197                   | 3,197                   | 3,037                         |
| 2022 | 2,9748                  | 2,4335                  | 2,7739                  | 3,1365                  | 3,1365                  | 3,1365                  | 3,1365                  | 3,1365                  | 2,983                         |
| 2023 | 2,9                     | 2,4065                  | 2,743                   | 3,076                   | 3,076                   | 3,076                   | 3,076                   | 3,076                   | 2,929                         |
| 2024 | 2,8252                  | 2,3795                  | 2,7121                  | 3,0155                  | 3,0155                  | 3,0155                  | 3,0155                  | 3,0155                  | 2,874                         |
| 2025 | 2,7504                  | 2,3525                  | 2,6812                  | 2,955                   | 2,955                   | 2,955                   | 2,955                   | 2,955                   | 2,820                         |
| 2026 | 2,6756                  | 2,3255                  | 2,6503                  | 2,8945                  | 2,8945                  | 2,8945                  | 2,8945                  | 2,8945                  | 2,765                         |
| 2027 | 2,6008                  | 2,2985                  | 2,6194                  | 2,834                   | 2,834                   | 2,834                   | 2,834                   | 2,834                   | 2,711                         |
| 2028 | 2,526                   | 2,2715                  | 2,5885                  | 2,7735                  | 2,7735                  | 2,7735                  | 2,7735                  | 2,7735                  | 2,657                         |
| 2029 | 2,4512                  | 2,2445                  | 2,5576                  | 2,713                   | 2,713                   | 2,713                   | 2,713                   | 2,713                   | 2,602                         |
| 2030 | 2,3764                  | 2,2175                  | 2,5267                  | 2,6525                  | 2,6525                  | 2,6525                  | 2,6525                  | 2,6525                  | 2,548                         |

<sup>†</sup> Data of Fertility rate of DANE [1] was used to forecast the department's fertility rate from 2005 to 2030. Holt-Winters no seasonal method in EViews 5 (Quantitative Micro Software, LLC) was used to forecast the fertility rate. In the SD model we used data from 2005 to 2030 and the region fertility rate was calculated as the average of all departments' fertility rates.

**Table 151. Fraction of births by departments, body mass index category, and socioeconomic status (Orinoquia y Amazonia region)<sup>†</sup>**

| Population group |                 | Lower SES (%/year) | Middle SES (%/year) | Higher SES (%/year) | Complete Urban Population (%/year) |
|------------------|-----------------|--------------------|---------------------|---------------------|------------------------------------|
| Department 81    | Not- overweight | 75,00%             | 75,00%              | 88,89%              | 79,63%                             |
|                  | Overweight      | 25,00%             | 25,00%              | 11,11%              | 20,37%                             |
|                  | Obese           | 0,00%              | 0,00%               | 0,00%               | 0,00%                              |
| Department 85    | Not- overweight | 68,75%             | 95,24%              | 71,43%              | 80,39%                             |
|                  | Overweight      | 25,00%             | 0,00%               | 21,43%              | 13,73%                             |
|                  | Obese           | 6,25%              | 4,76%               | 7,14%               | 5,88%                              |
| Department 86    | Not- overweight | 90,91%             | 94,44%              | 35,71%              | 74,42%                             |
|                  | Overweight      | 0,00%              | 5,56%               | 57,14%              | 20,93%                             |
|                  | Obese           | 9,09%              | 0,00%               | 7,14%               | 4,65%                              |
| Department 91    | Not- overweight | 90,70%             | 88,24%              | 81,82%              | 88,73%                             |
|                  | Overweight      | 9,30%              | 11,76%              | 9,09%               | 9,86%                              |
|                  | Obese           | 0,00%              | 0,00%               | 9,09%               | 1,41%                              |
| Department 94    | Not- overweight | 78,95%             | 72,73%              | 66,67%              | 76,36%                             |
|                  | Overweight      | 10,53%             | 27,27%              | 33,33%              | 16,36%                             |
|                  | Obese           | 10,53%             | 0,00%               | 0,00%               | 7,27%                              |
| Department 95    | Not- overweight | 88,89%             | 92,86%              | 80,00%              | 89,09%                             |
|                  | Overweight      | 11,11%             | 7,14%               | 0,00%               | 9,09%                              |
|                  | Obese           | 0,00%              | 0,00%               | 20,00%              | 1,82%                              |
| Department 97    | Not- overweight | 79,31%             | 66,67%              | 100,00%             | 79,03%                             |
|                  | Overweight      | 17,24%             | 33,33%              | 0,00%               | 17,74%                             |
|                  | Obese           | 3,45%              | 0,00%               | 0,00%               | 3,23%                              |
| Department 99    | Not- overweight | 76,19%             | 50,00%              | 100,00%             | 76,00%                             |
|                  | Overweight      | 19,05%             | 50,00%              | 0,00%               | 20,00%                             |
|                  | Obese           | 4,76%              | 0,00%               | 0,00%               | 4,00%                              |

† The fractions of births by each BMI category correspond to the prevalences by BMI category of children aged 0 to 12 months

**Table 152. Prevalent rates of entire population by age group, and body mass index category (Orinoquia y Amazonia region)**

| Departments   | Age group | Not- overweight in 2005 | Overweight in 2005 | Obese in 2005 | Not- overweight in 2010 | Overweight in 2010 | Obese in 2010 |
|---------------|-----------|-------------------------|--------------------|---------------|-------------------------|--------------------|---------------|
| Department 81 | 0-4       | 0.76991                 | 0.21239            | 0.01770       | 0.75099                 | 0.18577            | 0.06324       |
|               | 5-9       | 0.82266                 | 0.13793            | 0.03941       | 0.82313                 | 0.12245            | 0.05442       |
|               | 10-14     | 0.80711                 | 0.13706            | 0.05584       | 0.79110                 | 0.16438            | 0.04452       |
|               | 15-19     | 0.77714                 | 0.17143            | 0.05143       | 0.78295                 | 0.14729            | 0.06977       |
|               | 20-24     | 0.73864                 | 0.18750            | 0.07386       | 0.66667                 | 0.20000            | 0.13333       |
|               | 25-29     | 0.54651                 | 0.31977            | 0.13372       | 0.47929                 | 0.38462            | 0.13609       |
|               | 30-34     | 0.44138                 | 0.38621            | 0.17241       | 0.37278                 | 0.41420            | 0.21302       |
|               | 35-39     | 0.37226                 | 0.37956            | 0.24818       | 0.37821                 | 0.40385            | 0.21795       |
|               | 40-44     | 0.27737                 | 0.40146            | 0.32117       | 0.31325                 | 0.47590            | 0.21084       |
|               | 45-49     | 0.25714                 | 0.46667            | 0.27619       | 0.28571                 | 0.43651            | 0.27778       |
|               | 50-54     | 0.24675                 | 0.44156            | 0.31169       | 0.30108                 | 0.37634            | 0.32258       |
| 55-59         | 0.28571   | 0.30612                 | 0.40816            | 0.30357       | 0.32143                 | 0.37500            |               |
| Department 85 | 0-4       | 0.80447                 | 0.16760            | 0.02793       | 0.80370                 | 0.16296            | 0.03333       |
|               | 5-9       | 0.84848                 | 0.10909            | 0.04242       | 0.80259                 | 0.13916            | 0.05825       |
|               | 10-14     | 0.82353                 | 0.14379            | 0.03268       | 0.79538                 | 0.15842            | 0.04620       |
|               | 15-19     | 0.81250                 | 0.16250            | 0.02500       | 0.81423                 | 0.15020            | 0.03557       |
|               | 20-24     | 0.74725                 | 0.19231            | 0.06044       | 0.69849                 | 0.23116            | 0.07035       |
|               | 25-29     | 0.60920                 | 0.28161            | 0.10920       | 0.50962                 | 0.34135            | 0.14904       |
|               | 30-34     | 0.54867                 | 0.33628            | 0.11504       | 0.35870                 | 0.42391            | 0.21739       |
|               | 35-39     | 0.28846                 | 0.55769            | 0.15385       | 0.28804                 | 0.50000            | 0.21196       |

| Departments   | Age group     | Not- overweight in 2005 | Overweight in 2005 | Obese in 2005 | Not- overweight in 2010 | Overweight in 2010 | Obese in 2010 |
|---------------|---------------|-------------------------|--------------------|---------------|-------------------------|--------------------|---------------|
|               | 40-44         | 0.28889                 | 0.38889            | 0.32222       | 0.31034                 | 0.38621            | 0.30345       |
|               | 45-49         | 0.27273                 | 0.50649            | 0.22078       | 0.21488                 | 0.54545            | 0.23967       |
|               | 50-54         | 0.24615                 | 0.50769            | 0.24615       | 0.23077                 | 0.45192            | 0.31731       |
|               | 55-59         | 0.24444                 | 0.40000            | 0.35556       | 0.19118                 | 0.47059            | 0.33824       |
| Department 86 | 0-4           | 0.78788                 | 0.16667            | 0.04545       | 0.76923                 | 0.18750            | 0.04327       |
|               | 5-9           | 0.75862                 | 0.18966            | 0.05172       | 0.80451                 | 0.12782            | 0.06767       |
|               | 10-14         | 0.79630                 | 0.12963            | 0.07407       | 0.83122                 | 0.15190            | 0.01688       |
|               | 15-19         | 0.68889                 | 0.15556            | 0.15556       | 0.83505                 | 0.11340            | 0.05155       |
|               | 20-24         | 0.73333                 | 0.11111            | 0.15556       | 0.66851                 | 0.27624            | 0.05525       |
|               | 25-29         | 0.59091                 | 0.34091            | 0.06818       | 0.54211                 | 0.35263            | 0.10526       |
|               | 30-34         | 0.43590                 | 0.48718            | 0.07692       | 0.43151                 | 0.41781            | 0.15068       |
|               | 35-39         | 0.44828                 | 0.41379            | 0.13793       | 0.39831                 | 0.43220            | 0.16949       |
|               | 40-44         | 0.33333                 | 0.50000            | 0.16667       | 0.37190                 | 0.39669            | 0.23140       |
|               | 45-49         | 0.36842                 | 0.42105            | 0.21053       | 0.25275                 | 0.48352            | 0.26374       |
|               | 50-54         | 0.33333                 | 0.46667            | 0.20000       | 0.25806                 | 0.51613            | 0.22581       |
|               | 55-59         | 0.00000                 | 0.33333            | 0.66667       | 0.26415                 | 0.50943            | 0.22642       |
|               | Department 91 | 0-4                     | 0.80556            | 0.14931       | 0.04514                 | 0.75000            | 0.21000       |
| 5-9           |               | 0.80756                 | 0.16151            | 0.03093       | 0.81385                 | 0.14286            | 0.04329       |
| 10-14         |               | 0.75986                 | 0.18638            | 0.05376       | 0.75000                 | 0.15761            | 0.09239       |
| 15-19         |               | 0.81356                 | 0.13983            | 0.04661       | 0.82051                 | 0.15897            | 0.02051       |
| 20-24         |               | 0.65700                 | 0.24638            | 0.09662       | 0.61146                 | 0.29936            | 0.08917       |
| 25-29         |               | 0.50955                 | 0.32484            | 0.16561       | 0.45185                 | 0.41481            | 0.13333       |
| 30-34         |               | 0.38462                 | 0.38462            | 0.23077       | 0.40580                 | 0.39855            | 0.19565       |
| 35-39         |               | 0.33846                 | 0.40000            | 0.26154       | 0.37255                 | 0.46078            | 0.16667       |
| 40-44         |               | 0.30882                 | 0.47059            | 0.22059       | 0.32000                 | 0.45000            | 0.23000       |
| 45-49         |               | 0.23232                 | 0.41414            | 0.35354       | 0.11905                 | 0.52381            | 0.35714       |
| 50-54         |               | 0.20879                 | 0.49451            | 0.29670       | 0.21333                 | 0.42667            | 0.36000       |
| 55-59         |               | 0.33784                 | 0.35135            | 0.31081       | 0.27451                 | 0.43137            | 0.29412       |
| Department 94 |               | 0-4                     | 0.79741            | 0.15948       | 0.04310                 | 0.74089            | 0.21457       |
|               | 5-9           | 0.73333                 | 0.18333            | 0.08333       | 0.71233                 | 0.20548            | 0.08219       |
|               | 10-14         | 0.79389                 | 0.17939            | 0.02672       | 0.74060                 | 0.16541            | 0.09398       |
|               | 15-19         | 0.78421                 | 0.18421            | 0.03158       | 0.72772                 | 0.22277            | 0.04950       |
|               | 20-24         | 0.63190                 | 0.26994            | 0.09816       | 0.60563                 | 0.30282            | 0.09155       |
|               | 25-29         | 0.56098                 | 0.34146            | 0.09756       | 0.37975                 | 0.41139            | 0.20886       |
|               | 30-34         | 0.52414                 | 0.33793            | 0.13793       | 0.35417                 | 0.43750            | 0.20833       |
|               | 35-39         | 0.40940                 | 0.39597            | 0.19463       | 0.32258                 | 0.41935            | 0.25806       |
|               | 40-44         | 0.36029                 | 0.46324            | 0.17647       | 0.20690                 | 0.44828            | 0.34483       |
|               | 45-49         | 0.35238                 | 0.36190            | 0.28571       | 0.30526                 | 0.35789            | 0.33684       |
|               | 50-54         | 0.28395                 | 0.54321            | 0.17284       | 0.19540                 | 0.49425            | 0.31034       |
|               | 55-59         | 0.36620                 | 0.42254            | 0.21127       | 0.30303                 | 0.42424            | 0.27273       |
|               | Department 95 | 0-4                     | 0.76494            | 0.19522       | 0.03984                 | 0.66667            | 0.25490       |
| 5-9           |               | 0.82869                 | 0.15139            | 0.01992       | 0.71498                 | 0.17391            | 0.11111       |
| 10-14         |               | 0.85294                 | 0.13725            | 0.00980       | 0.78889                 | 0.16667            | 0.04444       |
| 15-19         |               | 0.83186                 | 0.15044            | 0.01770       | 0.79574                 | 0.14894            | 0.05532       |
| 20-24         |               | 0.75325                 | 0.21429            | 0.03247       | 0.63309                 | 0.26619            | 0.10072       |

| Departments   | Age group | Not- overweight in 2005 | Overweight in 2005 | Obese in 2005 | Not- overweight in 2010 | Overweight in 2010 | Obese in 2010 |
|---------------|-----------|-------------------------|--------------------|---------------|-------------------------|--------------------|---------------|
|               | 25-29     | 0.66667                 | 0.29167            | 0.04167       | 0.45370                 | 0.38889            | 0.15741       |
|               | 30-34     | 0.42063                 | 0.42063            | 0.15873       | 0.35238                 | 0.40000            | 0.24762       |
|               | 35-39     | 0.46364                 | 0.40000            | 0.13636       | 0.27586                 | 0.50000            | 0.22414       |
|               | 40-44     | 0.48529                 | 0.41912            | 0.09559       | 0.14151                 | 0.43396            | 0.42453       |
|               | 45-49     | 0.39252                 | 0.42991            | 0.17757       | 0.31731                 | 0.31731            | 0.36538       |
|               | 50-54     | 0.35065                 | 0.51948            | 0.12987       | 0.15584                 | 0.41558            | 0.42857       |
|               | 55-59     | 0.41176                 | 0.39216            | 0.19608       | 0.26415                 | 0.35849            | 0.37736       |
| Department 97 | 0-4       | 0.76494                 | 0.19522            | 0.03984       | 0.48792                 | 0.40097            | 0.11111       |
|               | 5-9       | 0.82869                 | 0.15139            | 0.01992       | 0.71186                 | 0.25000            | 0.03814       |
|               | 10-14     | 0.85294                 | 0.13725            | 0.00980       | 0.78070                 | 0.20614            | 0.01316       |
|               | 15-19     | 0.83186                 | 0.15044            | 0.01770       | 0.78922                 | 0.20588            | 0.00490       |
|               | 20-24     | 0.75325                 | 0.21429            | 0.03247       | 0.72951                 | 0.21311            | 0.05738       |
|               | 25-29     | 0.66667                 | 0.29167            | 0.04167       | 0.49495                 | 0.39394            | 0.11111       |
|               | 30-34     | 0.42063                 | 0.42063            | 0.15873       | 0.45652                 | 0.40217            | 0.14130       |
|               | 35-39     | 0.46364                 | 0.40000            | 0.13636       | 0.33750                 | 0.50000            | 0.16250       |
|               | 40-44     | 0.48529                 | 0.41912            | 0.09559       | 0.28169                 | 0.52113            | 0.19718       |
|               | 45-49     | 0.39252                 | 0.42991            | 0.17757       | 0.37500                 | 0.41250            | 0.21250       |
|               | 50-54     | 0.35065                 | 0.51948            | 0.12987       | 0.29487                 | 0.50000            | 0.20513       |
|               | 55-59     | 0.41176                 | 0.39216            | 0.19608       | 0.26316                 | 0.44737            | 0.28947       |
| Department 99 | 0-4       | 0.76699                 | 0.19417            | 0.03883       | 0.83951                 | 0.12757            | 0.03292       |
|               | 5-9       | 0.84064                 | 0.12351            | 0.03586       | 0.77358                 | 0.19340            | 0.03302       |
|               | 10-14     | 0.80349                 | 0.14847            | 0.04803       | 0.76623                 | 0.17316            | 0.06061       |
|               | 15-19     | 0.79888                 | 0.13408            | 0.06704       | 0.80543                 | 0.15385            | 0.04072       |
|               | 20-24     | 0.73077                 | 0.19231            | 0.07692       | 0.60274                 | 0.33562            | 0.06164       |
|               | 25-29     | 0.57554                 | 0.30216            | 0.12230       | 0.47887                 | 0.39437            | 0.12676       |
|               | 30-34     | 0.45455                 | 0.37121            | 0.17424       | 0.42276                 | 0.39837            | 0.17886       |
|               | 35-39     | 0.33043                 | 0.40000            | 0.26957       | 0.27193                 | 0.54386            | 0.18421       |
|               | 40-44     | 0.28846                 | 0.38462            | 0.32692       | 0.27083                 | 0.41667            | 0.31250       |
|               | 45-49     | 0.29000                 | 0.42000            | 0.29000       | 0.31068                 | 0.38835            | 0.30097       |
|               | 50-54     | 0.34118                 | 0.36471            | 0.29412       | 0.27586                 | 0.50000            | 0.22414       |
|               | 55-59     | 0.16279                 | 0.62791            | 0.20930       | 0.36000                 | 0.42000            | 0.22000       |

**Table 153. Prevalent rates of lower socioeconomic status population by age group, and body mass index category (Orinoquia y Amazonia region)**

| Departments   | Age group | Not- overweight in 2005 | Overweight in 2005 | Obese in 2005 | Not- overweight in 2010 | Overweight in 2010 | Obese in 2010 |
|---------------|-----------|-------------------------|--------------------|---------------|-------------------------|--------------------|---------------|
| Department 81 | 0-4       | 0.74684                 | 0.25316            | 0.00000       | 0.74576                 | 0.20339            | 0.05085       |
|               | 5-9       | 0.89706                 | 0.08824            | 0.01471       | 0.87591                 | 0.09489            | 0.02920       |
|               | 10-14     | 0.83871                 | 0.14516            | 0.01613       | 0.88034                 | 0.07692            | 0.04274       |
|               | 15-19     | 0.82692                 | 0.17308            | 0.00000       | 0.79000                 | 0.12000            | 0.09000       |
|               | 20-24     | 0.79032                 | 0.11290            | 0.09677       | 0.75362                 | 0.10145            | 0.14493       |
|               | 25-29     | 0.65116                 | 0.23256            | 0.11628       | 0.50704                 | 0.38028            | 0.11268       |
|               | 30-34     | 0.56757                 | 0.32432            | 0.10811       | 0.42857                 | 0.39286            | 0.17857       |
|               | 35-39     | 0.51515                 | 0.24242            | 0.24242       | 0.42553                 | 0.27660            | 0.29787       |

| Departments   | Age group     | Not- overweight in 2005 | Overweight in 2005 | Obese in 2005 | Not- overweight in 2010 | Overweight in 2010 | Obese in 2010 |         |
|---------------|---------------|-------------------------|--------------------|---------------|-------------------------|--------------------|---------------|---------|
|               | 40-44         | 0.34211                 | 0.52632            | 0.13158       | 0.40299                 | 0.38806            | 0.20896       |         |
|               | 45-49         | 0.50000                 | 0.25000            | 0.25000       | 0.43243                 | 0.37838            | 0.18919       |         |
|               | 50-54         | 0.20000                 | 0.50000            | 0.30000       | 0.35714                 | 0.35714            | 0.28571       |         |
|               | 55-59         | 0.42857                 | 0.28571            | 0.28571       | 0.43750                 | 0.25000            | 0.31250       |         |
| Department 85 | 0-4           | 0.77778                 | 0.20635            | 0.01587       | 0.80822                 | 0.17808            | 0.01370       |         |
|               | 5-9           | 0.95122                 | 0.04878            | 0.00000       | 0.85366                 | 0.10976            | 0.03659       |         |
|               | 10-14         | 0.86111                 | 0.13889            | 0.00000       | 0.89189                 | 0.08108            | 0.02703       |         |
|               | 15-19         | 0.78261                 | 0.17391            | 0.04348       | 0.87037                 | 0.12963            | 0.00000       |         |
|               | 20-24         | 0.75000                 | 0.20000            | 0.05000       | 0.71667                 | 0.25000            | 0.03333       |         |
|               | 25-29         | 0.77273                 | 0.13636            | 0.09091       | 0.51020                 | 0.36735            | 0.12245       |         |
|               | 30-34         | 0.51724                 | 0.34483            | 0.13793       | 0.33333                 | 0.41667            | 0.25000       |         |
|               | 35-39         | 0.39130                 | 0.47826            | 0.13043       | 0.38095                 | 0.50000            | 0.11905       |         |
|               | 40-44         | 0.36364                 | 0.45455            | 0.18182       | 0.40741                 | 0.40741            | 0.18519       |         |
|               | 45-49         | 0.50000                 | 0.50000            | 0.00000       | 0.50000                 | 0.37500            | 0.12500       |         |
|               | 50-54         | 0.33333                 | 0.40000            | 0.26667       | 0.21053                 | 0.47368            | 0.31579       |         |
|               | 55-59         | 0.33333                 | 0.33333            | 0.33333       | 0.18182                 | 0.45455            | 0.36364       |         |
|               | Department 86 | 0-4                     | 0.78788            | 0.16667       | 0.04545                 | 0.78125            | 0.18750       | 0.03125 |
|               |               | 5-9                     | 0.75862            | 0.18966       | 0.05172                 | 0.81818            | 0.12121       | 0.06061 |
| 10-14         |               | 0.79630                 | 0.12963            | 0.07407       | 0.86667                 | 0.12000            | 0.01333       |         |
| 15-19         |               | 0.68889                 | 0.15556            | 0.15556       | 0.84685                 | 0.11712            | 0.03604       |         |
| 20-24         |               | 0.73333                 | 0.11111            | 0.15556       | 0.67593                 | 0.26852            | 0.05556       |         |
| 25-29         |               | 0.59091                 | 0.34091            | 0.06818       | 0.49505                 | 0.37624            | 0.12871       |         |
| 30-34         |               | 0.43590                 | 0.48718            | 0.07692       | 0.48684                 | 0.40789            | 0.10526       |         |
| 35-39         |               | 0.44828                 | 0.41379            | 0.13793       | 0.48438                 | 0.37500            | 0.14063       |         |
| 40-44         |               | 0.33333                 | 0.50000            | 0.16667       | 0.42105                 | 0.28070            | 0.29825       |         |
| 45-49         |               | 0.36842                 | 0.42105            | 0.21053       | 0.22500                 | 0.47500            | 0.30000       |         |
| 50-54         |               | 0.33333                 | 0.46667            | 0.20000       | 0.25806                 | 0.54839            | 0.19355       |         |
| 55-59         |               | 0.00000                 | 0.33333            | 0.66667       | 0.26667                 | 0.50000            | 0.23333       |         |
| Department 91 |               | 0-4                     | 0.76748            | 0.19187       | 0.04065                 | 0.73006            | 0.23313       | 0.03681 |
|               |               | 5-9                     | 0.85308            | 0.09005       | 0.05687                 | 0.85789            | 0.10526       | 0.03684 |
|               | 10-14         | 0.82573                 | 0.13278            | 0.04149       | 0.76119                 | 0.15672            | 0.08209       |         |
|               | 15-19         | 0.87772                 | 0.10326            | 0.01902       | 0.83784                 | 0.14865            | 0.01351       |         |
|               | 20-24         | 0.78268                 | 0.16469            | 0.05263       | 0.57600                 | 0.36000            | 0.06400       |         |
|               | 25-29         | 0.61024                 | 0.27394            | 0.11581       | 0.44554                 | 0.40594            | 0.14851       |         |
|               | 30-34         | 0.52577                 | 0.32216            | 0.15206       | 0.44211                 | 0.40000            | 0.15789       |         |
|               | 35-39         | 0.50535                 | 0.35027            | 0.14439       | 0.38889                 | 0.47222            | 0.13889       |         |
|               | 40-44         | 0.42781                 | 0.37968            | 0.19251       | 0.32000                 | 0.46667            | 0.21333       |         |
|               | 45-49         | 0.39308                 | 0.39623            | 0.21069       | 0.13043                 | 0.56522            | 0.30435       |         |
|               | 50-54         | 0.37638                 | 0.36162            | 0.26199       | 0.30952                 | 0.35714            | 0.33333       |         |
|               | 55-59         | 0.37879                 | 0.41919            | 0.20202       | 0.32258                 | 0.41935            | 0.25806       |         |
|               | Department 94 | 0-4                     | 0.76748            | 0.19187       | 0.04065                 | 0.69231            | 0.30769       | 0.00000 |
|               |               | 5-9                     | 0.85308            | 0.09005       | 0.05687                 | 0.66667            | 0.22222       | 0.11111 |
| 10-14         |               | 0.82573                 | 0.13278            | 0.04149       | 0.52174                 | 0.26087            | 0.21739       |         |
| 15-19         |               | 0.87772                 | 0.10326            | 0.01902       | 0.76923                 | 0.23077            | 0.00000       |         |
| 20-24         |               | 0.78268                 | 0.16469            | 0.05263       | 0.37500                 | 0.50000            | 0.12500       |         |

| Departments   | Age group     | Not- overweight in 2005 | Overweight in 2005 | Obese in 2005 | Not- overweight in 2010 | Overweight in 2010 | Obese in 2010 |
|---------------|---------------|-------------------------|--------------------|---------------|-------------------------|--------------------|---------------|
|               | 25-29         | 0.61024                 | 0.27394            | 0.11581       | 0.50000                 | 0.40000            | 0.10000       |
|               | 30-34         | 0.52577                 | 0.32216            | 0.15206       | 0.46667                 | 0.26667            | 0.26667       |
|               | 35-39         | 0.50535                 | 0.35027            | 0.14439       | 0.26316                 | 0.57895            | 0.15789       |
|               | 40-44         | 0.42781                 | 0.37968            | 0.19251       | 0.25000                 | 0.43750            | 0.31250       |
|               | 45-49         | 0.39308                 | 0.39623            | 0.21069       | 0.08333                 | 0.25000            | 0.66667       |
|               | 50-54         | 0.37638                 | 0.36162            | 0.26199       | 0.27273                 | 0.27273            | 0.45455       |
|               | 55-59         | 0.37879                 | 0.41919            | 0.20202       | 0.30000                 | 0.30000            | 0.40000       |
| Department 95 | 0-4           | 0.76748                 | 0.19187            | 0.04065       | 0.68681                 | 0.24725            | 0.06593       |
|               | 5-9           | 0.85308                 | 0.09005            | 0.05687       | 0.71345                 | 0.16959            | 0.11696       |
|               | 10-14         | 0.82573                 | 0.13278            | 0.04149       | 0.79237                 | 0.17373            | 0.03390       |
|               | 15-19         | 0.87772                 | 0.10326            | 0.01902       | 0.80303                 | 0.15152            | 0.04545       |
|               | 20-24         | 0.78268                 | 0.16469            | 0.05263       | 0.62609                 | 0.26087            | 0.11304       |
|               | 25-29         | 0.61024                 | 0.27394            | 0.11581       | 0.44681                 | 0.39362            | 0.15957       |
|               | 30-34         | 0.52577                 | 0.32216            | 0.15206       | 0.37079                 | 0.35955            | 0.26966       |
|               | 35-39         | 0.50535                 | 0.35027            | 0.14439       | 0.28000                 | 0.51000            | 0.21000       |
|               | 40-44         | 0.42781                 | 0.37968            | 0.19251       | 0.15000                 | 0.43750            | 0.41250       |
|               | 45-49         | 0.39308                 | 0.39623            | 0.21069       | 0.36364                 | 0.29870            | 0.33766       |
|               | 50-54         | 0.37638                 | 0.36162            | 0.26199       | 0.14286                 | 0.39683            | 0.46032       |
|               | 55-59         | 0.37879                 | 0.41919            | 0.20202       | 0.29268                 | 0.34146            | 0.36585       |
|               | Department 97 | 0-4                     | 0.76793            | 0.18987       | 0.04219                 | 0.49000            | 0.40500       |
| 5-9           |               | 0.83043                 | 0.15217            | 0.01739       | 0.71739                 | 0.24348            | 0.03913       |
| 10-14         |               | 0.86347                 | 0.12915            | 0.00738       | 0.78995                 | 0.19635            | 0.01370       |
| 15-19         |               | 0.84264                 | 0.13706            | 0.02030       | 0.79000                 | 0.20500            | 0.00500       |
| 20-24         |               | 0.76471                 | 0.20588            | 0.02941       | 0.73109                 | 0.21008            | 0.05882       |
| 25-29         |               | 0.64894                 | 0.29787            | 0.05319       | 0.49451                 | 0.38462            | 0.12088       |
| 30-34         |               | 0.44898                 | 0.38776            | 0.16327       | 0.46914                 | 0.40741            | 0.12346       |
| 35-39         |               | 0.46237                 | 0.39785            | 0.13978       | 0.33784                 | 0.50000            | 0.16216       |
| 40-44         |               | 0.50000                 | 0.41667            | 0.08333       | 0.27941                 | 0.54412            | 0.17647       |
| 45-49         |               | 0.35714                 | 0.45238            | 0.19048       | 0.38961                 | 0.40260            | 0.20779       |
| 50-54         |               | 0.36667                 | 0.48333            | 0.15000       | 0.28571                 | 0.50649            | 0.20779       |
| 55-59         |               | 0.41463                 | 0.34146            | 0.24390       | 0.27273                 | 0.48485            | 0.24242       |
| Department 99 |               | 0-4                     | 0.78125            | 0.18125       | 0.03750                 | 0.84120            | 0.12876       |
|               | 5-9           | 0.85714                 | 0.11111            | 0.03175       | 0.78109                 | 0.18408            | 0.03483       |
|               | 10-14         | 0.82635                 | 0.13772            | 0.03593       | 0.76498                 | 0.17512            | 0.05991       |
|               | 15-19         | 0.79200                 | 0.12800            | 0.08000       | 0.81106                 | 0.14747            | 0.04147       |
|               | 20-24         | 0.72152                 | 0.20253            | 0.07595       | 0.61314                 | 0.32117            | 0.06569       |
|               | 25-29         | 0.55446                 | 0.32673            | 0.11881       | 0.46094                 | 0.42188            | 0.11719       |
|               | 30-34         | 0.46429                 | 0.38095            | 0.15476       | 0.43860                 | 0.37719            | 0.18421       |
|               | 35-39         | 0.36000                 | 0.40000            | 0.24000       | 0.27451                 | 0.54902            | 0.17647       |
|               | 40-44         | 0.37097                 | 0.35484            | 0.27419       | 0.29213                 | 0.43820            | 0.26966       |
|               | 45-49         | 0.25862                 | 0.41379            | 0.32759       | 0.33333                 | 0.38710            | 0.27957       |
|               | 50-54         | 0.36667                 | 0.35000            | 0.28333       | 0.27778                 | 0.51852            | 0.20370       |
|               | 55-59         | 0.17857                 | 0.67857            | 0.14286       | 0.34783                 | 0.43478            | 0.21739       |



**Table 154. Prevalent rates of middle socioeconomic status population by age group, and body mass index category (Orinoquia y Amazonia region)**

| Departments   | Age group | Not- overweight in 2005 | Overweight in 2005 | Obese in 2005 | Not- overweight in 2010 | Overweight in 2010 | Obese in 2010 |
|---------------|-----------|-------------------------|--------------------|---------------|-------------------------|--------------------|---------------|
| Department 81 | 0-4       | 0.74444                 | 0.24444            | 0.01111       | 0.76860                 | 0.16529            | 0.06612       |
|               | 5-9       | 0.79070                 | 0.16279            | 0.04651       | 0.80451                 | 0.13534            | 0.06015       |
|               | 10-14     | 0.77632                 | 0.17105            | 0.05263       | 0.76056                 | 0.19014            | 0.04930       |
|               | 15-19     | 0.77465                 | 0.16901            | 0.05634       | 0.80000                 | 0.14615            | 0.05385       |
|               | 20-24     | 0.71014                 | 0.21739            | 0.07246       | 0.62366                 | 0.24731            | 0.12903       |
|               | 25-29     | 0.50000                 | 0.37500            | 0.12500       | 0.45882                 | 0.38824            | 0.15294       |
|               | 30-34     | 0.35714                 | 0.48214            | 0.16071       | 0.35106                 | 0.41489            | 0.23404       |
|               | 35-39     | 0.31481                 | 0.40741            | 0.27778       | 0.40506                 | 0.40506            | 0.18987       |
|               | 40-44     | 0.33333                 | 0.30952            | 0.35714       | 0.26761                 | 0.50704            | 0.22535       |
|               | 45-49     | 0.16667                 | 0.58333            | 0.25000       | 0.23881                 | 0.43284            | 0.32836       |
|               | 50-54     | 0.30769                 | 0.50000            | 0.19231       | 0.26190                 | 0.45238            | 0.28571       |
| 55-59         | 0.40000   | 0.26667                 | 0.33333            | 0.26667       | 0.33333                 | 0.40000            |               |
| Department 85 | 0-4       | 0.84615                 | 0.13846            | 0.01538       | 0.77419                 | 0.18548            | 0.04032       |
|               | 5-9       | 0.82609                 | 0.13043            | 0.04348       | 0.75000                 | 0.20833            | 0.04167       |
|               | 10-14     | 0.81034                 | 0.12069            | 0.06897       | 0.79688                 | 0.15625            | 0.04688       |
|               | 15-19     | 0.80000                 | 0.18000            | 0.02000       | 0.82243                 | 0.13084            | 0.04673       |
|               | 20-24     | 0.66667                 | 0.24074            | 0.09259       | 0.69231                 | 0.20513            | 0.10256       |
|               | 25-29     | 0.48387                 | 0.38710            | 0.12903       | 0.52222                 | 0.31111            | 0.16667       |
|               | 30-34     | 0.68421                 | 0.21053            | 0.10526       | 0.35065                 | 0.40260            | 0.24675       |
|               | 35-39     | 0.32258                 | 0.58065            | 0.09677       | 0.33766                 | 0.46753            | 0.19481       |
|               | 40-44     | 0.36000                 | 0.36000            | 0.28000       | 0.29630                 | 0.33333            | 0.37037       |
|               | 45-49     | 0.16667                 | 0.58333            | 0.25000       | 0.19048                 | 0.52381            | 0.28571       |
|               | 50-54     | 0.22222                 | 0.44444            | 0.33333       | 0.26471                 | 0.26471            | 0.47059       |
| 55-59         | 0.29412   | 0.23529                 | 0.47059            | 0.24138       | 0.44828                 | 0.31034            |               |
| Department 86 | 0-4       | 0.76190                 | 0.15873            | 0.07937       | 0.76389                 | 0.18056            | 0.05556       |
|               | 5-9       | 0.85294                 | 0.11765            | 0.02941       | 0.75824                 | 0.15385            | 0.08791       |
|               | 10-14     | 0.72222                 | 0.19444            | 0.08333       | 0.74026                 | 0.23377            | 0.02597       |
|               | 15-19     | 0.77273                 | 0.18182            | 0.04545       | 0.83784                 | 0.10811            | 0.05405       |
|               | 20-24     | 0.60000                 | 0.28889            | 0.11111       | 0.64789                 | 0.29577            | 0.05634       |
|               | 25-29     | 0.62745                 | 0.25490            | 0.11765       | 0.59524                 | 0.33333            | 0.07143       |
|               | 30-34     | 0.31111                 | 0.44444            | 0.24444       | 0.37705                 | 0.40984            | 0.21311       |
|               | 35-39     | 0.31707                 | 0.48780            | 0.19512       | 0.29787                 | 0.48936            | 0.21277       |
|               | 40-44     | 0.33333                 | 0.40741            | 0.25926       | 0.32075                 | 0.50943            | 0.16981       |
|               | 45-49     | 0.30000                 | 0.45000            | 0.25000       | 0.25581                 | 0.48837            | 0.25581       |
|               | 50-54     | 0.17391                 | 0.39130            | 0.43478       | 0.25000                 | 0.46429            | 0.28571       |
| 55-59         | 0.11111   | 0.38889                 | 0.50000            | 0.26667       | 0.60000                 | 0.13333            |               |
| Department 91 | 0-4       | 0.78824                 | 0.17059            | 0.04118       | 0.81250                 | 0.12500            | 0.06250       |
|               | 5-9       | 0.89655                 | 0.08621            | 0.01724       | 0.66667                 | 0.25000            | 0.08333       |
|               | 10-14     | 0.89041                 | 0.08219            | 0.02740       | 0.78049                 | 0.12195            | 0.09756       |
|               | 15-19     | 0.86813                 | 0.12088            | 0.01099       | 0.85000                 | 0.12500            | 0.02500       |

| Departments   | Age group | Not- overweight in 2005 | Overweight in 2005 | Obese in 2005 | Not- overweight in 2010 | Overweight in 2010 | Obese in 2010 |
|---------------|-----------|-------------------------|--------------------|---------------|-------------------------|--------------------|---------------|
|               | 20-24     | 0.81065                 | 0.12426            | 0.06509       | 0.77419                 | 0.06452            | 0.16129       |
|               | 25-29     | 0.63830                 | 0.24823            | 0.11348       | 0.51724                 | 0.37931            | 0.10345       |
|               | 30-34     | 0.53846                 | 0.36538            | 0.09615       | 0.36842                 | 0.34211            | 0.28947       |
|               | 35-39     | 0.56075                 | 0.30841            | 0.13084       | 0.40000                 | 0.40000            | 0.20000       |
|               | 40-44     | 0.35238                 | 0.45714            | 0.19048       | 0.38889                 | 0.33333            | 0.27778       |
|               | 45-49     | 0.37374                 | 0.45455            | 0.17172       | 0.13793                 | 0.48276            | 0.37931       |
|               | 50-54     | 0.37143                 | 0.37143            | 0.25714       | 0.07692                 | 0.50000            | 0.42308       |
|               | 55-59     | 0.54000                 | 0.32000            | 0.14000       | 0.20000                 | 0.53333            | 0.26667       |
| Department 94 | 0-4       | 0.78824                 | 0.17059            | 0.04118       | 0.74359                 | 0.20940            | 0.04701       |
|               | 5-9       | 0.89655                 | 0.08621            | 0.01724       | 0.71642                 | 0.20398            | 0.07960       |
|               | 10-14     | 0.89041                 | 0.08219            | 0.02740       | 0.76132                 | 0.15638            | 0.08230       |
|               | 15-19     | 0.86813                 | 0.12088            | 0.01099       | 0.72487                 | 0.22222            | 0.05291       |
|               | 20-24     | 0.81065                 | 0.12426            | 0.06509       | 0.61940                 | 0.29104            | 0.08955       |
|               | 25-29     | 0.63830                 | 0.24823            | 0.11348       | 0.37162                 | 0.41216            | 0.21622       |
|               | 30-34     | 0.53846                 | 0.36538            | 0.09615       | 0.34375                 | 0.46094            | 0.19531       |
|               | 35-39     | 0.56075                 | 0.30841            | 0.13084       | 0.33333                 | 0.39048            | 0.27619       |
|               | 40-44     | 0.35238                 | 0.45714            | 0.19048       | 0.20000                 | 0.45000            | 0.35000       |
|               | 45-49     | 0.37374                 | 0.45455            | 0.17172       | 0.34146                 | 0.36585            | 0.29268       |
|               | 50-54     | 0.37143                 | 0.37143            | 0.25714       | 0.18421                 | 0.52632            | 0.28947       |
|               | 55-59     | 0.54000                 | 0.32000            | 0.14000       | 0.30357                 | 0.44643            | 0.25000       |
| Department 95 | 0-4       | 0.78824                 | 0.17059            | 0.04118       | 0.50000                 | 0.31818            | 0.18182       |
|               | 5-9       | 0.89655                 | 0.08621            | 0.01724       | 0.71429                 | 0.20000            | 0.08571       |
|               | 10-14     | 0.89041                 | 0.08219            | 0.02740       | 0.77419                 | 0.12903            | 0.09677       |
|               | 15-19     | 0.86813                 | 0.12088            | 0.01099       | 0.77778                 | 0.11111            | 0.11111       |
|               | 20-24     | 0.81065                 | 0.12426            | 0.06509       | 0.69565                 | 0.26087            | 0.04348       |
|               | 25-29     | 0.63830                 | 0.24823            | 0.11348       | 0.46154                 | 0.38462            | 0.15385       |
|               | 30-34     | 0.53846                 | 0.36538            | 0.09615       | 0.28571                 | 0.57143            | 0.14286       |
|               | 35-39     | 0.56075                 | 0.30841            | 0.13084       | 0.26667                 | 0.40000            | 0.33333       |
|               | 40-44     | 0.35238                 | 0.45714            | 0.19048       | 0.12000                 | 0.40000            | 0.48000       |
|               | 45-49     | 0.37374                 | 0.45455            | 0.17172       | 0.16000                 | 0.36000            | 0.48000       |
|               | 50-54     | 0.37143                 | 0.37143            | 0.25714       | 0.08333                 | 0.58333            | 0.33333       |
|               | 55-59     | 0.54000                 | 0.32000            | 0.14000       | 0.18182                 | 0.36364            | 0.45455       |
| Department 97 | 0-4       | 0.66667                 | 0.33333            | 0.00000       | 0.42857                 | 0.28571            | 0.28571       |
|               | 5-9       | 0.76471                 | 0.17647            | 0.05882       | 0.50000                 | 0.50000            | 0.00000       |
|               | 10-14     | 0.84615                 | 0.15385            | 0.00000       | 0.71429                 | 0.28571            | 0.00000       |
|               | 15-19     | 0.75000                 | 0.25000            | 0.00000       | 0.66667                 | 0.33333            | 0.00000       |
|               | 20-24     | 0.76923                 | 0.23077            | 0.00000       | 1.00000                 | 0.00000            | 0.00000       |
|               | 25-29     | 0.66667                 | 0.33333            | 0.00000       | 0.57143                 | 0.42857            | 0.00000       |
|               | 30-34     | 0.30000                 | 0.55000            | 0.15000       | 0.40000                 | 0.40000            | 0.20000       |
|               | 35-39     | 0.50000                 | 0.35714            | 0.14286       | 0.33333                 | 0.50000            | 0.16667       |
|               | 40-44     | 0.45000                 | 0.35000            | 0.20000       | 0.33333                 | 0.00000            | 0.66667       |
|               | 45-49     | 0.52632                 | 0.31579            | 0.15789       | 0.00000                 | 0.66667            | 0.33333       |
|               | 50-54     | 0.22222                 | 0.77778            | 0.00000       | 1.00000                 | 0.00000            | 0.00000       |
|               | 55-59     | 0.37500                 | 0.62500            | 0.00000       | 0.20000                 | 0.20000            | 0.60000       |
| Department    | 0-4       | 0.73529                 | 0.20588            | 0.05882       | 0.80000                 | 0.10000            | 0.10000       |

| Departments | Age group | Not- overweight in 2005 | Overweight in 2005 | Obese in 2005 | Not- overweight in 2010 | Overweight in 2010 | Obese in 2010 |
|-------------|-----------|-------------------------|--------------------|---------------|-------------------------|--------------------|---------------|
| 99          | 5-9       | 0.80000                 | 0.14000            | 0.06000       | 0.63636                 | 0.36364            | 0.00000       |
|             | 10-14     | 0.75000                 | 0.15385            | 0.09615       | 0.78571                 | 0.14286            | 0.07143       |
|             | 15-19     | 0.82927                 | 0.14634            | 0.02439       | 0.50000                 | 0.50000            | 0.00000       |
|             | 20-24     | 0.80000                 | 0.15000            | 0.05000       | 0.44444                 | 0.55556            | 0.00000       |
|             | 25-29     | 0.51724                 | 0.31034            | 0.17241       | 0.64286                 | 0.14286            | 0.21429       |
|             | 30-34     | 0.39394                 | 0.39394            | 0.21212       | 0.22222                 | 0.66667            | 0.11111       |
|             | 35-39     | 0.25806                 | 0.38710            | 0.35484       | 0.25000                 | 0.50000            | 0.25000       |
|             | 40-44     | 0.14706                 | 0.38235            | 0.47059       | 0.00000                 | 0.14286            | 0.85714       |
|             | 45-49     | 0.35294                 | 0.38235            | 0.26471       | 0.10000                 | 0.40000            | 0.50000       |
|             | 50-54     | 0.27273                 | 0.40909            | 0.31818       | 0.33333                 | 0.33333            | 0.33333       |
|             | 55-59     | 0.20000                 | 0.60000            | 0.20000       | 0.50000                 | 0.25000            | 0.25000       |

**Table 155. Prevalent rates of higher socioeconomic status population by age group, and body mass index category (Orinoquia y Amazonia region)**

| Departments   | Age group | Not- overweight in 2005 | Overweight in 2005 | Obese in 2005 | Not- overweight in 2010 | Overweight in 2010 | Obese in 2010 |
|---------------|-----------|-------------------------|--------------------|---------------|-------------------------|--------------------|---------------|
| Department 81 | 0-4       | 0.84211                 | 0.10526            | 0.05263       | 0.64286                 | 0.21429            | 0.14286       |
|               | 5-9       | 0.77551                 | 0.16327            | 0.06122       | 0.62500                 | 0.20833            | 0.16667       |
|               | 10-14     | 0.81356                 | 0.08475            | 0.10169       | 0.60606                 | 0.36364            | 0.03030       |
|               | 15-19     | 0.73077                 | 0.17308            | 0.09615       | 0.67857                 | 0.25000            | 0.07143       |
|               | 20-24     | 0.71111                 | 0.24444            | 0.04444       | 0.55556                 | 0.33333            | 0.11111       |
|               | 25-29     | 0.52632                 | 0.31579            | 0.15789       | 0.46154                 | 0.38462            | 0.15385       |
|               | 30-34     | 0.44231                 | 0.32692            | 0.23077       | 0.31579                 | 0.47368            | 0.21053       |
|               | 35-39     | 0.34000                 | 0.44000            | 0.22000       | 0.23333                 | 0.60000            | 0.16667       |
|               | 40-44     | 0.19298                 | 0.38596            | 0.42105       | 0.21429                 | 0.60714            | 0.17857       |
|               | 45-49     | 0.22449                 | 0.46939            | 0.30612       | 0.18182                 | 0.54545            | 0.27273       |
|               | 50-54     | 0.22581                 | 0.35484            | 0.41935       | 0.30435                 | 0.26087            | 0.43478       |
| 55-59         | 0.10000   | 0.35000                 | 0.55000            | 0.20000       | 0.40000                 | 0.40000            |               |
| Department 85 | 0-4       | 0.78431                 | 0.15686            | 0.05882       | 0.84932                 | 0.10959            | 0.04110       |
|               | 5-9       | 0.80000                 | 0.12727            | 0.07273       | 0.82243                 | 0.08411            | 0.09346       |
|               | 10-14     | 0.81356                 | 0.16949            | 0.01695       | 0.72277                 | 0.21782            | 0.05941       |
|               | 15-19     | 0.84375                 | 0.14063            | 0.01563       | 0.77174                 | 0.18478            | 0.04348       |
|               | 20-24     | 0.80882                 | 0.14706            | 0.04412       | 0.68852                 | 0.24590            | 0.06557       |
|               | 25-29     | 0.61765                 | 0.27941            | 0.10294       | 0.49275                 | 0.36232            | 0.14493       |
|               | 30-34     | 0.45652                 | 0.43478            | 0.10870       | 0.38028                 | 0.45070            | 0.16901       |
|               | 35-39     | 0.22000                 | 0.58000            | 0.20000       | 0.16923                 | 0.53846            | 0.29231       |
|               | 40-44     | 0.20930                 | 0.37209            | 0.41860       | 0.28125                 | 0.42188            | 0.29688       |
|               | 45-49     | 0.27907                 | 0.46512            | 0.25581       | 0.15873                 | 0.60317            | 0.23810       |
|               | 50-54     | 0.21875                 | 0.59375            | 0.18750       | 0.21569                 | 0.56863            | 0.21569       |
| 55-59         | 0.18182   | 0.54545                 | 0.27273            | 0.14286       | 0.50000                 | 0.35714            |               |
| Department 91 | 0-4       | 0.72826                 | 0.20652            | 0.06522       | 1.00000                 | 0.00000            | 0.00000       |
|               | 5-9       | 0.74390                 | 0.13415            | 0.12195       | 0.20000                 | 0.80000            | 0.00000       |
|               | 10-14     | 0.68132                 | 0.24176            | 0.07692       | 0.44444                 | 0.33333            | 0.22222       |
|               | 15-19     | 0.81379                 | 0.14483            | 0.04138       | 0.28571                 | 0.57143            | 0.14286       |

| Departments | Age group | Not- overweight in 2005 | Overweight in 2005 | Obese in 2005 | Not- overweight in 2010 | Overweight in 2010 | Obese in 2010 |
|-------------|-----------|-------------------------|--------------------|---------------|-------------------------|--------------------|---------------|
|             | 20-24     | 0.72961                 | 0.20601            | 0.06438       | 0.00000                 | 0.00000            | 1.00000       |
|             | 25-29     | 0.60989                 | 0.28022            | 0.10989       | 0.20000                 | 0.80000            | 0.00000       |
|             | 30-34     | 0.41808                 | 0.36158            | 0.22034       | 0.00000                 | 0.80000            | 0.20000       |
|             | 35-39     | 0.40000                 | 0.42581            | 0.17419       | 0.00000                 | 0.60000            | 0.40000       |
|             | 40-44     | 0.35526                 | 0.39474            | 0.25000       | 0.14286                 | 0.57143            | 0.28571       |
|             | 45-49     | 0.36301                 | 0.41781            | 0.21918       | 0.00000                 | 0.44444            | 0.55556       |
|             | 50-54     | 0.25833                 | 0.42500            | 0.31667       | 0.14286                 | 0.57143            | 0.28571       |
|             | 55-59     | 0.23762                 | 0.53465            | 0.22772       | 0.20000                 | 0.20000            | 0.60000       |

**Table 156. Mortality rates and population size by age group at the department level without segregate by socioeconomic status (Orinoquia y Amazonia region) †**

| Departments   | Age group | Mortality rates (R) (%/year) | Not- overweight population in 2005 (Number of people)1 | Overweight population in 2005 (Number of people)2 | Obese population in 2005 (Number of people)3 |
|---------------|-----------|------------------------------|--------------------------------------------------------|---------------------------------------------------|----------------------------------------------|
| Department 81 | 0-4       | 0.00364                      | 14605                                                  | 4029                                              | 336                                          |
|               | 5-9       | 0.00035                      | 14077                                                  | 2360                                              | 674                                          |
|               | 10-14     | 0.00038                      | 12903                                                  | 2191                                              | 893                                          |
|               | 15-19     | 0.00192                      | 10916                                                  | 2408                                              | 722                                          |
|               | 20-24     | 0.00369                      | 9600                                                   | 2437                                              | 960                                          |
|               | 25-29     | 0.00263                      | 6017                                                   | 3521                                              | 1472                                         |
|               | 30-34     | 0.00211                      | 4383                                                   | 3835                                              | 1712                                         |
|               | 35-39     | 0.00198                      | 3385                                                   | 3452                                              | 2257                                         |
|               | 40-44     | 0.00268                      | 2274                                                   | 3291                                              | 2633                                         |
|               | 45-49     | 0.00276                      | 1675                                                   | 3040                                              | 1799                                         |
|               | 50-54     | 0.00547                      | 1128                                                   | 2018                                              | 1425                                         |
| 55-59         | 0.00801   | 999                          | 1071                                                   | 1427                                              |                                              |
| Department 85 | 0-4       | 0.00325                      | 18069                                                  | 3764                                              | 627                                          |
|               | 5-9       | 0.00026                      | 19677                                                  | 2530                                              | 984                                          |
|               | 10-14     | 0.00047                      | 19071                                                  | 3330                                              | 757                                          |
|               | 15-19     | 0.00114                      | 17111                                                  | 3422                                              | 527                                          |
|               | 20-24     | 0.00246                      | 13078                                                  | 3366                                              | 1058                                         |
|               | 25-29     | 0.00259                      | 10354                                                  | 4786                                              | 1856                                         |
|               | 30-34     | 0.00271                      | 8511                                                   | 5216                                              | 1785                                         |
|               | 35-39     | 0.00228                      | 4173                                                   | 8068                                              | 2226                                         |
|               | 40-44     | 0.00230                      | 3519                                                   | 4737                                              | 3925                                         |
|               | 45-49     | 0.00254                      | 2577                                                   | 4786                                              | 2086                                         |
|               | 50-54     | 0.00430                      | 1776                                                   | 3664                                              | 1776                                         |
| 55-59         | 0.00946   | 1344                         | 2199                                                   | 1955                                              |                                              |
| Department 86 | 0-4       | 0.00300                      | 12885                                                  | 2726                                              | 743                                          |
|               | 5-9       | 0.00024                      | 12709                                                  | 3177                                              | 867                                          |
|               | 10-14     | 0.00012                      | 13359                                                  | 2175                                              | 1243                                         |
|               | 15-19     | 0.00175                      | 10227                                                  | 2309                                              | 2309                                         |

|                      |              |         |      |      |      |
|----------------------|--------------|---------|------|------|------|
|                      | <b>20-24</b> | 0.00407 | 9901 | 1500 | 2100 |
|                      | <b>25-29</b> | 0.00274 | 6891 | 3975 | 795  |
|                      | <b>30-34</b> | 0.00449 | 4081 | 4561 | 720  |
|                      | <b>35-39</b> | 0.00185 | 3885 | 3586 | 1195 |
|                      | <b>40-44</b> | 0.00284 | 2349 | 3524 | 1175 |
|                      | <b>45-49</b> | 0.00373 | 2073 | 2369 | 1185 |
|                      | <b>50-54</b> | 0.00636 | 1416 | 1982 | 850  |
|                      | <b>55-59</b> | 0.00633 | 0    | 1053 | 2105 |
| <b>Department 91</b> | <b>0-4</b>   | 0.01074 | 2249 | 417  | 126  |
|                      | <b>5-9</b>   | 0.00087 | 2795 | 559  | 107  |
|                      | <b>10-14</b> | 0.00080 | 2857 | 701  | 202  |
|                      | <b>15-19</b> | 0.00107 | 3027 | 520  | 173  |
|                      | <b>20-24</b> | 0.00129 | 1529 | 573  | 225  |
|                      | <b>25-29</b> | 0.00428 | 834  | 532  | 271  |
|                      | <b>30-34</b> | 0.00412 | 654  | 654  | 393  |
|                      | <b>35-39</b> | 0.00183 | 553  | 654  | 428  |
|                      | <b>40-44</b> | 0.00280 | 442  | 673  | 315  |
|                      | <b>45-49</b> | 0.00286 | 244  | 435  | 371  |
|                      | <b>50-54</b> | 0.00626 | 167  | 395  | 237  |
|                      | <b>55-59</b> | 0.00954 | 177  | 184  | 163  |
| <b>Department 94</b> | <b>0-4</b>   | 0.00661 | 1086 | 217  | 59   |
|                      | <b>5-9</b>   | 0.00182 | 1206 | 301  | 137  |
|                      | <b>10-14</b> | 0.00000 | 1355 | 306  | 46   |
|                      | <b>15-19</b> | 0.00073 | 1070 | 251  | 43   |
|                      | <b>20-24</b> | 0.00531 | 476  | 203  | 74   |
|                      | <b>25-29</b> | 0.00139 | 403  | 245  | 70   |
|                      | <b>30-34</b> | 0.00145 | 363  | 234  | 95   |
|                      | <b>35-39</b> | 0.00151 | 271  | 262  | 129  |
|                      | <b>40-44</b> | 0.00333 | 216  | 278  | 106  |
|                      | <b>45-49</b> | 0.00437 | 161  | 166  | 131  |
|                      | <b>50-54</b> | 0.00797 | 71   | 136  | 43   |
|                      | <b>55-59</b> | 0.01266 | 87   | 100  | 50   |
| <b>Department 95</b> | <b>0-4</b>   | 0.00299 | 5634 | 1438 | 293  |
|                      | <b>5-9</b>   | 0.00041 | 6132 | 1120 | 147  |
|                      | <b>10-14</b> | 0.00013 | 6800 | 1094 | 78   |
|                      | <b>15-19</b> | 0.00065 | 5108 | 924  | 109  |
|                      | <b>20-24</b> | 0.00296 | 2547 | 725  | 110  |
|                      | <b>25-29</b> | 0.00424 | 1889 | 826  | 118  |
|                      | <b>30-34</b> | 0.00303 | 1248 | 1248 | 471  |
|                      | <b>35-39</b> | 0.00339 | 1230 | 1062 | 362  |
|                      | <b>40-44</b> | 0.00437 | 1333 | 1151 | 262  |
|                      | <b>45-49</b> | 0.00423 | 742  | 813  | 336  |
|                      | <b>50-54</b> | 0.00466 | 526  | 780  | 195  |
|                      | <b>55-59</b> | 0.00302 | 409  | 389  | 195  |
| <b>Department 97</b> | <b>0-4</b>   | 0.00092 | 1671 | 427  | 87   |
|                      | <b>5-9</b>   | 0.00100 | 1659 | 303  | 40   |
|                      | <b>10-14</b> | 0.00050 | 1697 | 273  | 20   |

|               |       |         |      |     |     |
|---------------|-------|---------|------|-----|-----|
|               | 15-19 | 0.00000 | 1512 | 274 | 32  |
|               | 20-24 | 0.00096 | 783  | 223 | 34  |
|               | 25-29 | 0.00000 | 486  | 213 | 30  |
|               | 30-34 | 0.00122 | 346  | 346 | 130 |
|               | 35-39 | 0.00127 | 364  | 314 | 107 |
|               | 40-44 | 0.00402 | 363  | 313 | 71  |
|               | 45-49 | 0.00000 | 236  | 258 | 107 |
|               | 50-54 | 0.00233 | 151  | 223 | 56  |
|               | 55-59 | 0.00424 | 97   | 93  | 46  |
| Department 99 | 0-4   | 0.00330 | 2322 | 588 | 118 |
|               | 5-9   | 0.00033 | 2540 | 373 | 108 |
|               | 10-14 | 0.00000 | 2525 | 466 | 151 |
|               | 15-19 | 0.00000 | 2354 | 395 | 198 |
|               | 20-24 | 0.00249 | 1173 | 309 | 123 |
|               | 25-29 | 0.00260 | 665  | 349 | 141 |
|               | 30-34 | 0.00080 | 570  | 465 | 218 |
|               | 35-39 | 0.00170 | 389  | 470 | 317 |
|               | 40-44 | 0.00192 | 301  | 401 | 341 |
|               | 45-49 | 0.00113 | 256  | 370 | 256 |
|               | 50-54 | 0.00163 | 209  | 223 | 180 |
|               | 55-59 | 0.00691 | 71   | 273 | 91  |

†Values used in this table are for the urban population

<sup>1</sup> Initial value used in the stock of not-overweight population in 2005.

<sup>2</sup> Initial value used in the stock of overweight population in 2005.

<sup>3</sup> Initial value used in the stock of obese population in 2005.

**Table 157. Mortality rates and population size by age group at the department level for the lower socioeconomic status population (Orinoquia y Amazonia region) †**

| Departments   | Age group | Mortality rates (R) (%/year) | Not-overweight population in 2005 (Number of people) <sup>1</sup> | Overweight population in 2005 (Number of people) <sup>2</sup> | Obese population in 2005 (Number of people) <sup>3</sup> |
|---------------|-----------|------------------------------|-------------------------------------------------------------------|---------------------------------------------------------------|----------------------------------------------------------|
| Department 81 | 0-4       | 0.00364                      | 4952                                                              | 1679                                                          | 0                                                        |
|               | 5-9       | 0.00035                      | 5142                                                              | 506                                                           | 84                                                       |
|               | 10-14     | 0.00038                      | 4220                                                              | 730                                                           | 81                                                       |
|               | 15-19     | 0.00192                      | 3451                                                              | 722                                                           | 0                                                        |
|               | 20-24     | 0.00369                      | 3618                                                              | 517                                                           | 443                                                      |
|               | 25-29     | 0.00263                      | 1792                                                              | 640                                                           | 320                                                      |
|               | 30-34     | 0.00211                      | 1438                                                              | 822                                                           | 274                                                      |
|               | 35-39     | 0.00198                      | 1128                                                              | 531                                                           | 531                                                      |
|               | 40-44     | 0.00268                      | 778                                                               | 1197                                                          | 299                                                      |
|               | 45-49     | 0.00276                      | 620                                                               | 310                                                           | 310                                                      |
|               | 50-54     | 0.00547                      | 237                                                               | 594                                                           | 356                                                      |
|               | 55-59     | 0.00801                      | 428                                                               | 285                                                           | 285                                                      |
| Department 85 | 0-4       | 0.00325                      | 6149                                                              | 1631                                                          | 125                                                      |
|               | 5-9       | 0.00026                      | 5482                                                              | 281                                                           | 0                                                        |
|               | 10-14     | 0.00047                      | 4692                                                              | 757                                                           | 0                                                        |

|                  |                  |         |         |      |     |
|------------------|------------------|---------|---------|------|-----|
|                  | 15-19            | 0.00114 | 4739    | 1053 | 263 |
|                  | 20-24            | 0.00246 | 4327    | 1154 | 288 |
|                  | 25-29            | 0.00259 | 3321    | 586  | 391 |
|                  | 30-34            | 0.00271 | 2059    | 1373 | 549 |
|                  | 35-39            | 0.00228 | 1252    | 1530 | 417 |
|                  | 40-44            | 0.00230 | 1083    | 1354 | 541 |
|                  | 45-49            | 0.00254 | 614     | 614  | 0   |
|                  | 50-54            | 0.00430 | 555     | 666  | 444 |
|                  | 55-59            | 0.00946 | 244     | 244  | 244 |
| Department<br>86 | 0-4              | 0.00300 | 5468    | 1157 | 315 |
|                  | 5-9              | 0.00024 | 4277    | 1069 | 292 |
|                  | 10-14            | 0.00012 | 4268    | 695  | 397 |
|                  | 15-19            | 0.00175 | 3668    | 828  | 828 |
|                  | 20-24            | 0.00407 | 3144    | 476  | 667 |
|                  | 25-29            | 0.00274 | 1934    | 1116 | 223 |
|                  | 30-34            | 0.00449 | 1125    | 1258 | 199 |
|                  | 35-39            | 0.00185 | 1163    | 1074 | 358 |
|                  | 40-44            | 0.00284 | 735     | 1102 | 367 |
|                  | 45-49            | 0.00373 | 476     | 544  | 272 |
|                  | 50-54            | 0.00636 | 423     | 593  | 254 |
|                  | 55-59            | 0.00633 | 0       | 250  | 500 |
|                  | Department<br>91 | 0-4     | 0.01074 | 909  | 227 |
| 5-9              |                  | 0.00087 | 993     | 105  | 66  |
| 10-14            |                  | 0.00080 | 992     | 160  | 50  |
| 15-19            |                  | 0.00107 | 1171    | 138  | 25  |
| 20-24            |                  | 0.00129 | 578     | 122  | 39  |
| 25-29            |                  | 0.00428 | 280     | 126  | 53  |
| 30-34            |                  | 0.00412 | 247     | 151  | 71  |
| 35-39            |                  | 0.00183 | 247     | 171  | 71  |
| 40-44            |                  | 0.00280 | 191     | 170  | 86  |
| 45-49            |                  | 0.00286 | 95      | 96   | 51  |
| 50-54            |                  | 0.00626 | 90      | 86   | 63  |
| 55-59            |                  | 0.00954 | 47      | 52   | 25  |
| Department<br>94 |                  | 0-4     | 0.00661 | 444  | 111 |
|                  | 5-9              | 0.00182 | 472     | 50   | 31  |
|                  | 10-14            | 0.00000 | 450     | 72   | 23  |
|                  | 15-19            | 0.00073 | 430     | 51   | 9   |
|                  | 20-24            | 0.00531 | 187     | 39   | 13  |
|                  | 25-29            | 0.00139 | 123     | 55   | 23  |
|                  | 30-34            | 0.00145 | 100     | 61   | 29  |
|                  | 35-39            | 0.00151 | 100     | 69   | 29  |
|                  | 40-44            | 0.00333 | 80      | 71   | 36  |
|                  | 45-49            | 0.00437 | 41      | 42   | 22  |
|                  | 50-54            | 0.00797 | 28      | 27   | 20  |
|                  | 55-59            | 0.01266 | 21      | 24   | 11  |
|                  | Department<br>95 | 0-4     | 0.00299 | 2399 | 600 |
| 5-9              |                  | 0.00041 | 2124    | 224  | 142 |

|                  |       |         |      |     |     |
|------------------|-------|---------|------|-----|-----|
|                  | 10-14 | 0.00013 | 2103 | 338 | 106 |
|                  | 15-19 | 0.00065 | 1933 | 227 | 42  |
|                  | 20-24 | 0.00296 | 840  | 177 | 57  |
|                  | 25-29 | 0.00424 | 485  | 218 | 92  |
|                  | 30-34 | 0.00303 | 430  | 264 | 124 |
|                  | 35-39 | 0.00339 | 402  | 278 | 115 |
|                  | 40-44 | 0.00437 | 368  | 326 | 165 |
|                  | 45-49 | 0.00423 | 171  | 172 | 91  |
|                  | 50-54 | 0.00466 | 169  | 162 | 118 |
|                  | 55-59 | 0.00302 | 89   | 99  | 48  |
| Department<br>97 | 0-4   | 0.00092 | 1584 | 392 | 87  |
|                  | 5-9   | 0.00100 | 1523 | 279 | 32  |
|                  | 10-14 | 0.00050 | 1522 | 228 | 13  |
|                  | 15-19 | 0.00000 | 1335 | 217 | 32  |
|                  | 20-24 | 0.00096 | 702  | 189 | 27  |
|                  | 25-29 | 0.00000 | 371  | 170 | 30  |
|                  | 30-34 | 0.00122 | 287  | 248 | 104 |
|                  | 35-39 | 0.00127 | 307  | 264 | 93  |
|                  | 40-44 | 0.00402 | 297  | 247 | 49  |
|                  | 45-49 | 0.00000 | 169  | 213 | 90  |
| Department<br>99 | 50-54 | 0.00233 | 123  | 162 | 50  |
|                  | 55-59 | 0.00424 | 79   | 65  | 46  |
|                  | 0-4   | 0.00330 | 1004 | 233 | 48  |
|                  | 5-9   | 0.00033 | 871  | 113 | 32  |
|                  | 10-14 | 0.00000 | 830  | 138 | 36  |
|                  | 15-19 | 0.00000 | 837  | 135 | 85  |
|                  | 20-24 | 0.00249 | 368  | 103 | 39  |
|                  | 25-29 | 0.00260 | 180  | 106 | 39  |
|                  | 30-34 | 0.00080 | 160  | 132 | 53  |
|                  | 35-39 | 0.00170 | 127  | 141 | 85  |
| Department<br>81 | 40-44 | 0.00192 | 121  | 116 | 89  |
|                  | 45-49 | 0.00113 | 52   | 84  | 66  |
|                  | 50-54 | 0.00163 | 67   | 64  | 52  |
|                  | 55-59 | 0.00691 | 18   | 70  | 15  |

†Values used in this table are for the urban population

<sup>1</sup> Initial value used in the stock of not-overweight population in 2005 for lower SES.

<sup>2</sup> Initial value used in the stock of overweight population in 2005 for lower SES.

<sup>3</sup> Initial value used in the stock of obese population in 2005 for lower SES.

**Table 158. Mortality rates and population size by age group at the department level for the middle socioeconomic status population (Orinoquia y Amazonia region) †**

| Departments      | Age group | Mortality rates (R) (%/year) | Not-overweight population in 2005 (Number of people)1 | Overweight population in 2005 (Number of people)2 | Obese population in 2005 (Number of people)3 |
|------------------|-----------|------------------------------|-------------------------------------------------------|---------------------------------------------------|----------------------------------------------|
| Department<br>81 | 0-4       | 0.00364                      | 5624                                                  | 1847                                              | 84                                           |
|                  | 5-9       | 0.00035                      | 5732                                                  | 1180                                              | 337                                          |



|                      |                      |            |         |      |     |
|----------------------|----------------------|------------|---------|------|-----|
|                      | <b>10-14</b>         | 0.00038    | 4788    | 1055 | 325 |
|                      | <b>15-19</b>         | 0.00192    | 4414    | 963  | 321 |
|                      | <b>20-24</b>         | 0.00369    | 3618    | 1108 | 369 |
|                      | <b>25-29</b>         | 0.00263    | 2304    | 1728 | 576 |
|                      | <b>30-34</b>         | 0.00211    | 1370    | 1849 | 616 |
|                      | <b>35-39</b>         | 0.00198    | 1128    | 1460 | 996 |
|                      | <b>40-44</b>         | 0.00268    | 838     | 778  | 898 |
|                      | <b>45-49</b>         | 0.00276    | 372     | 1303 | 558 |
|                      | <b>50-54</b>         | 0.00547    | 475     | 772  | 297 |
|                      | <b>55-59</b>         | 0.00801    | 428     | 285  | 357 |
| <b>Department 85</b> | <b>0-4</b>           | 0.00325    | 6901    | 1129 | 125 |
|                      | <b>5-9</b>           | 0.00026    | 8011    | 1265 | 422 |
|                      | <b>10-14</b>         | 0.00047    | 7114    | 1060 | 605 |
|                      | <b>15-19</b>         | 0.00114    | 5265    | 1185 | 132 |
|                      | <b>20-24</b>         | 0.00246    | 3462    | 1250 | 481 |
|                      | <b>25-29</b>         | 0.00259    | 2930    | 2344 | 781 |
|                      | <b>30-34</b>         | 0.00271    | 3569    | 1098 | 549 |
|                      | <b>35-39</b>         | 0.00228    | 1391    | 2504 | 417 |
|                      | <b>40-44</b>         | 0.00230    | 1218    | 1218 | 947 |
|                      | <b>45-49</b>         | 0.00254    | 491     | 1718 | 736 |
|                      | <b>50-54</b>         | 0.00430    | 444     | 888  | 666 |
|                      | <b>55-59</b>         | 0.00946    | 611     | 489  | 977 |
|                      | <b>Department 86</b> | <b>0-4</b> | 0.00300 | 3444 | 718 |
| <b>5-9</b>           |                      | 0.00024    | 3928    | 542  | 135 |
| <b>10-14</b>         |                      | 0.00012    | 3670    | 988  | 423 |
| <b>15-19</b>         |                      | 0.00175    | 2837    | 667  | 167 |
| <b>20-24</b>         |                      | 0.00407    | 2324    | 1119 | 430 |
| <b>25-29</b>         |                      | 0.00274    | 2298    | 933  | 431 |
| <b>30-34</b>         |                      | 0.00449    | 781     | 1115 | 613 |
| <b>35-39</b>         |                      | 0.00185    | 786     | 1209 | 484 |
| <b>40-44</b>         |                      | 0.00284    | 660     | 806  | 513 |
| <b>45-49</b>         |                      | 0.00373    | 526     | 788  | 438 |
| <b>50-54</b>         |                      | 0.00636    | 191     | 429  | 477 |
| <b>55-59</b>         |                      | 0.00633    | 89      | 310  | 399 |
| <b>Department 91</b> |                      | <b>0-4</b> | 0.01074 | 608  | 132 |
|                      | <b>5-9</b>           | 0.00087    | 853     | 82   | 16  |
|                      | <b>10-14</b>         | 0.00080    | 1014    | 94   | 31  |
|                      | <b>15-19</b>         | 0.00107    | 799     | 111  | 10  |
|                      | <b>20-24</b>         | 0.00129    | 541     | 83   | 43  |
|                      | <b>25-29</b>         | 0.00428    | 328     | 128  | 58  |
|                      | <b>30-34</b>         | 0.00412    | 246     | 167  | 44  |
|                      | <b>35-39</b>         | 0.00183    | 262     | 144  | 61  |
|                      | <b>40-44</b>         | 0.00280    | 141     | 184  | 76  |
|                      | <b>45-49</b>         | 0.00286    | 122     | 149  | 56  |
|                      | <b>50-54</b>         | 0.00626    | 77      | 77   | 53  |
|                      | <b>55-59</b>         | 0.00954    | 71      | 42   | 19  |
|                      | <b>Department</b>    | <b>0-4</b> | 0.00661 | 297  | 64  |

|                      |              |         |      |     |     |
|----------------------|--------------|---------|------|-----|-----|
| <b>94</b>            | <b>5-9</b>   | 0.00182 | 405  | 39  | 8   |
|                      | <b>10-14</b> | 0.00000 | 460  | 42  | 14  |
|                      | <b>15-19</b> | 0.00073 | 293  | 41  | 4   |
|                      | <b>20-24</b> | 0.00531 | 175  | 27  | 14  |
|                      | <b>25-29</b> | 0.00139 | 144  | 56  | 26  |
|                      | <b>30-34</b> | 0.00145 | 100  | 68  | 18  |
|                      | <b>35-39</b> | 0.00151 | 106  | 58  | 25  |
|                      | <b>40-44</b> | 0.00333 | 59   | 77  | 32  |
|                      | <b>45-49</b> | 0.00437 | 53   | 65  | 24  |
|                      | <b>50-54</b> | 0.00797 | 24   | 24  | 17  |
| <b>55-59</b>         | 0.01266      | 32      | 19   | 8   |     |
| <b>Department 95</b> | <b>0-4</b>   | 0.00299 | 1605 | 347 | 84  |
|                      | <b>5-9</b>   | 0.00041 | 1824 | 175 | 35  |
|                      | <b>10-14</b> | 0.00013 | 2150 | 198 | 66  |
|                      | <b>15-19</b> | 0.00065 | 1318 | 184 | 17  |
|                      | <b>20-24</b> | 0.00296 | 787  | 121 | 63  |
|                      | <b>25-29</b> | 0.00424 | 568  | 221 | 101 |
|                      | <b>30-34</b> | 0.00303 | 428  | 291 | 76  |
|                      | <b>35-39</b> | 0.00339 | 426  | 234 | 99  |
|                      | <b>40-44</b> | 0.00437 | 272  | 352 | 147 |
|                      | <b>45-49</b> | 0.00423 | 220  | 268 | 101 |
|                      | <b>50-54</b> | 0.00466 | 144  | 144 | 100 |
|                      | <b>55-59</b> | 0.00302 | 135  | 80  | 35  |
| <b>Department 97</b> | <b>0-4</b>   | 0.00092 | 52   | 26  | 0   |
|                      | <b>5-9</b>   | 0.00100 | 104  | 24  | 8   |
|                      | <b>10-14</b> | 0.00050 | 143  | 26  | 0   |
|                      | <b>15-19</b> | 0.00000 | 145  | 48  | 0   |
|                      | <b>20-24</b> | 0.00096 | 67   | 20  | 0   |
|                      | <b>25-29</b> | 0.00000 | 61   | 30  | 0   |
|                      | <b>30-34</b> | 0.00122 | 39   | 72  | 20  |
|                      | <b>35-39</b> | 0.00127 | 50   | 36  | 14  |
|                      | <b>40-44</b> | 0.00402 | 49   | 38  | 22  |
|                      | <b>45-49</b> | 0.00000 | 56   | 34  | 17  |
|                      | <b>50-54</b> | 0.00233 | 11   | 39  | 0   |
|                      | <b>55-59</b> | 0.00424 | 14   | 23  | 0   |
| <b>Department 99</b> | <b>0-4</b>   | 0.00330 | 615  | 172 | 49  |
|                      | <b>5-9</b>   | 0.00033 | 664  | 116 | 50  |
|                      | <b>10-14</b> | 0.00000 | 714  | 146 | 92  |
|                      | <b>15-19</b> | 0.00000 | 604  | 107 | 18  |
|                      | <b>20-24</b> | 0.00249 | 368  | 69  | 23  |
|                      | <b>25-29</b> | 0.00260 | 188  | 113 | 63  |
|                      | <b>30-34</b> | 0.00080 | 132  | 132 | 71  |
|                      | <b>35-39</b> | 0.00170 | 87   | 130 | 119 |
|                      | <b>40-44</b> | 0.00192 | 43   | 112 | 138 |
|                      | <b>45-49</b> | 0.00113 | 97   | 105 | 73  |
|                      | <b>50-54</b> | 0.00163 | 43   | 65  | 50  |
|                      | <b>55-59</b> | 0.00691 | 22   | 66  | 22  |

†Values used in this table are for the urban population

1 Initial value used in the stock of not-overweight population in 2005 for middle SES.

2 Initial value used in the stock of overweight population in 2005 for middle SES.

3 Initial value used in the stock of obese population in 2005 for middle SES.

**Table 159. Mortality rates and population size by age group at the department level for the higher socioeconomic status population (Orinoquia y Amazonia region) †**

| Departments   | Age group | Mortality rates (R) (%/year) | Not-overweight population in 2005 (Number of people)1 | Overweight population in 2005 (Number of people)2 | Obese population in 2005 (Number of people)3 |
|---------------|-----------|------------------------------|-------------------------------------------------------|---------------------------------------------------|----------------------------------------------|
| Department 81 | 0-4       | 0.00364                      | 4029                                                  | 504                                               | 252                                          |
|               | 5-9       | 0.00035                      | 3203                                                  | 674                                               | 253                                          |
|               | 10-14     | 0.00038                      | 3895                                                  | 406                                               | 487                                          |
|               | 15-19     | 0.00192                      | 3050                                                  | 722                                               | 401                                          |
|               | 20-24     | 0.00369                      | 2363                                                  | 812                                               | 148                                          |
|               | 25-29     | 0.00263                      | 1920                                                  | 1152                                              | 576                                          |
|               | 30-34     | 0.00211                      | 1575                                                  | 1164                                              | 822                                          |
|               | 35-39     | 0.00198                      | 1128                                                  | 1460                                              | 730                                          |
|               | 40-44     | 0.00268                      | 658                                                   | 1316                                              | 1436                                         |
|               | 45-49     | 0.00276                      | 683                                                   | 1427                                              | 931                                          |
|               | 50-54     | 0.00547                      | 416                                                   | 653                                               | 772                                          |
| 55-59         | 0.00801   | 143                          | 500                                                   | 785                                               |                                              |
| Department 85 | 0-4       | 0.00325                      | 5019                                                  | 1004                                              | 376                                          |
|               | 5-9       | 0.00026                      | 6184                                                  | 984                                               | 562                                          |
|               | 10-14     | 0.00047                      | 7265                                                  | 1514                                              | 151                                          |
|               | 15-19     | 0.00114                      | 7108                                                  | 1185                                              | 132                                          |
|               | 20-24     | 0.00246                      | 5289                                                  | 962                                               | 288                                          |
|               | 25-29     | 0.00259                      | 4102                                                  | 1856                                              | 684                                          |
|               | 30-34     | 0.00271                      | 2883                                                  | 2745                                              | 686                                          |
|               | 35-39     | 0.00228                      | 1530                                                  | 4034                                              | 1391                                         |
|               | 40-44     | 0.00230                      | 1218                                                  | 2166                                              | 2436                                         |
|               | 45-49     | 0.00254                      | 1473                                                  | 2454                                              | 1350                                         |
|               | 50-54     | 0.00430                      | 777                                                   | 2110                                              | 666                                          |
| 55-59         | 0.00946   | 489                          | 1466                                                  | 733                                               |                                              |
| Department 91 | 0-4       | 0.01074                      | 608                                                   | 173                                               | 54                                           |
|               | 5-9       | 0.00087                      | 1001                                                  | 180                                               | 164                                          |
|               | 10-14     | 0.00080                      | 967                                                   | 343                                               | 109                                          |
|               | 15-19     | 0.00107                      | 1193                                                  | 212                                               | 61                                           |
|               | 20-24     | 0.00129                      | 672                                                   | 190                                               | 59                                           |
|               | 25-29     | 0.00428                      | 405                                                   | 186                                               | 73                                           |
|               | 30-34     | 0.00412                      | 324                                                   | 281                                               | 171                                          |
|               | 35-39     | 0.00183                      | 271                                                   | 289                                               | 118                                          |
|               | 40-44     | 0.00280                      | 206                                                   | 229                                               | 145                                          |
|               | 45-49     | 0.00286                      | 175                                                   | 201                                               | 106                                          |
|               | 50-54     | 0.00626                      | 91                                                    | 150                                               | 112                                          |
| 55-59         | 0.00954   | 64                           | 143                                                   | 61                                                |                                              |

†Values used in this table are for the urban population

<sup>1</sup> Initial value used in the stock of not-overweight population in 2005 for higher SES.

<sup>2</sup> Initial value used in the stock of overweight population in 2005 for higher SES.

<sup>3</sup> Initial value used in the stock of obese population in 2005 for higher SES.

## References

- 1 Departamento Administrativo Nacional de Estadística. Series de población. <http://www.dane.gov.co/index.php/estadisticas-por-tema/demografia-y-poblacion/series-de-poblacion> (accessed 11 Jul 2017).
